# Supplementary material for: Directional Ionic Bonds
Source: PubMed Central journal article supplement (PMC10119990; doi:10.1021/jacs.3c01030), 2023-04-07
Supplement: ja3c01030_si_001.pdf [file ja3c01030_si_001.pdf]

## Supporting Information

# Directional Ionic Bonds

Illia Hutskalov, Anthony Linden, and Ilija Čorić\*

Department of Chemistry, University of Zurich, Winterthurerstrasse 190, CH-8057 Zurich, Switzerland.

### Table of Contents

|        |                                                                                                                        |     |
|--------|------------------------------------------------------------------------------------------------------------------------|-----|
| 1      | Figures S1-S8.....                                                                                                     | 3   |
| 2      | Materials and Methods .....                                                                                            | 10  |
| 2.1    | General information .....                                                                                              | 10  |
| 2.2    | Synthesis of cations <b>C2<sup>+</sup></b> and <b>C3<sup>+</sup></b> .....                                             | 13  |
| 2.3    | Synthesis of anions <b>A2<sup>-</sup></b> and <b>A3<sup>-</sup></b> .....                                              | 16  |
| 2.4    | Synthesis of cations present in <b>1-6</b> .....                                                                       | 21  |
| 2.5    | Synthesis of anions present in <b>1-6</b> .....                                                                        | 32  |
| 2.6    | Synthesis of cations present in <b>7-10</b> .....                                                                      | 45  |
| 2.7    | Synthesis of anions present in <b>9-10</b> .....                                                                       | 51  |
| 2.8    | Synthesis and characterization of the ion pairs .....                                                                  | 57  |
| 2.9    | Analysis of the directionality of the ionic bonds in solution .....                                                    | 67  |
| 2.9.1  | Analysis of <b>C3<sup>+</sup>A3<sup>-</sup></b> by ROESY.....                                                          | 67  |
| 2.9.2  | Analysis of <b>3</b> by ROESY.....                                                                                     | 70  |
| 2.9.3  | Analysis of <b>7</b> by ROESY.....                                                                                     | 78  |
| 2.9.4  | Analysis of <b>8</b> by ROESY.....                                                                                     | 82  |
| 2.9.5  | Analysis of <b>3</b> in the presence of <sup>n</sup> Bu <sub>4</sub> N <sup>+</sup> BF <sub>4</sub> <sup>-</sup> ..... | 85  |
| 2.10   | <sup>1</sup> H- <sup>1</sup> H DOSY NMR experiments .....                                                              | 88  |
| 2.11   | Thermal stability analysis .....                                                                                       | 96  |
| 2.11.1 | Thermogravimetric analysis (TGA) and melting points .....                                                              | 96  |
| 2.11.2 | NMR studies of thermal stability of <b>10</b> .....                                                                    | 97  |
| 2.12   | Computational studies .....                                                                                            | 98  |
| 3      | Supplementary Data.....                                                                                                | 104 |
| 3.1    | NMR spectra .....                                                                                                      | 104 |

|       |                                                                     |     |
|-------|---------------------------------------------------------------------|-----|
| 3.2   | Cartesian coordinates of DFT and PM6 optimized structures.....      | 199 |
| 3.2.1 | Structures optimized at the M06-2X/6-31+G(d,p) level of theory..... | 199 |
| 3.2.2 | Structures optimized at the M06-2X/6-31G(d) level of theory.....    | 215 |
| 3.2.3 | Structure optimized with the PM6 semi-empirical method.....         | 219 |
| 3.3   | Crystallographic data.....                                          | 222 |
| 4     | Supplementary References .....                                      | 277 |

# 1 Figures S1-S8

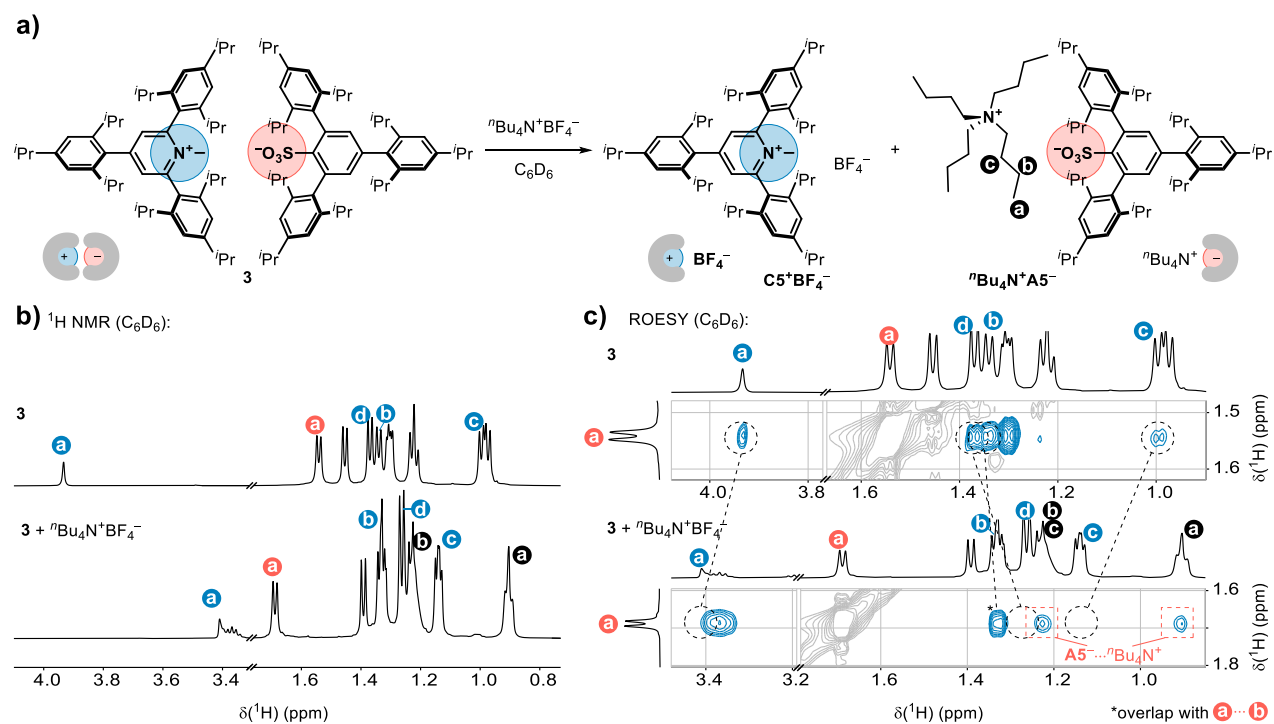

**Figure S1.** (a) The cleavage of the directional ionic bond. (b)-(c) Comparisons of the selected regions of the  $^1\text{H NMR}$  and ROESY spectra of **3** before and after the addition of  $n\text{Bu}_4\text{N}^+\text{BF}_4^-$ .

**a) Analysis of **3** and the truncated structures**

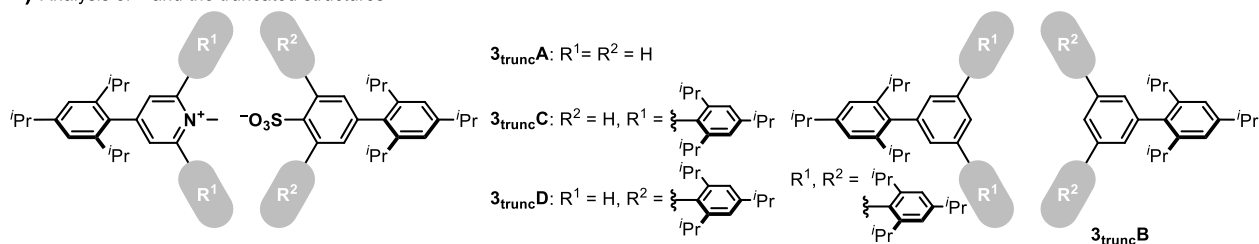

Color code for energy contributions: Total energy (blue), Electrostatic (red), Dispersion (grey), Exchange (black), Induction (white)

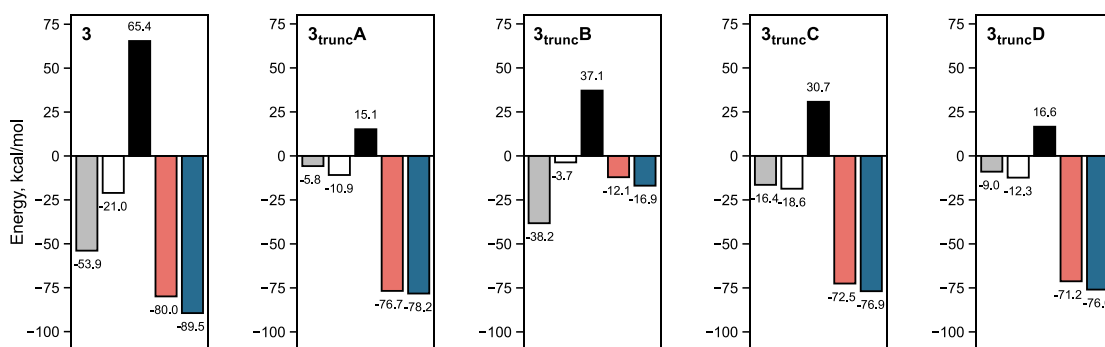

Structural contributors: all, cation-anion (no shielding groups), shield<sub>N</sub>-shield<sub>S</sub> (no ionic groups), shield<sub>N</sub>-anion (+ anion-cation), shield<sub>S</sub>-cation (+ anion-cation)

**b) Comparison with different shielding groups<sup>a</sup>**

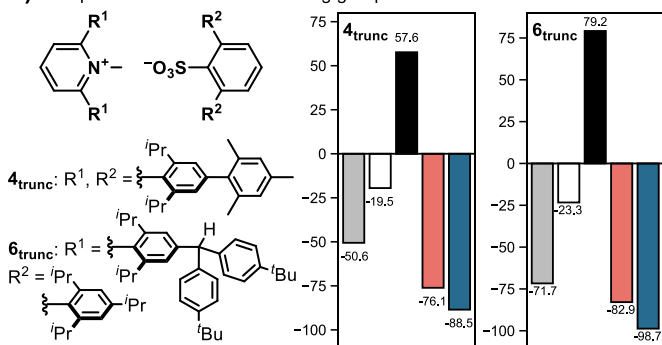

**c) Distance-dependent analysis of a directional ionic bond<sup>b</sup>**

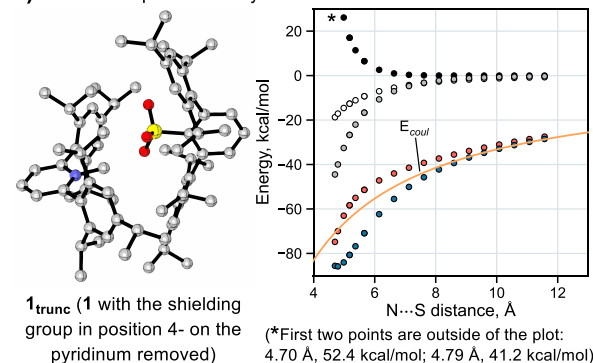

**d) Comparison with simpler ion pair and hydrogen- and halogen-bonded systems<sup>b</sup>**

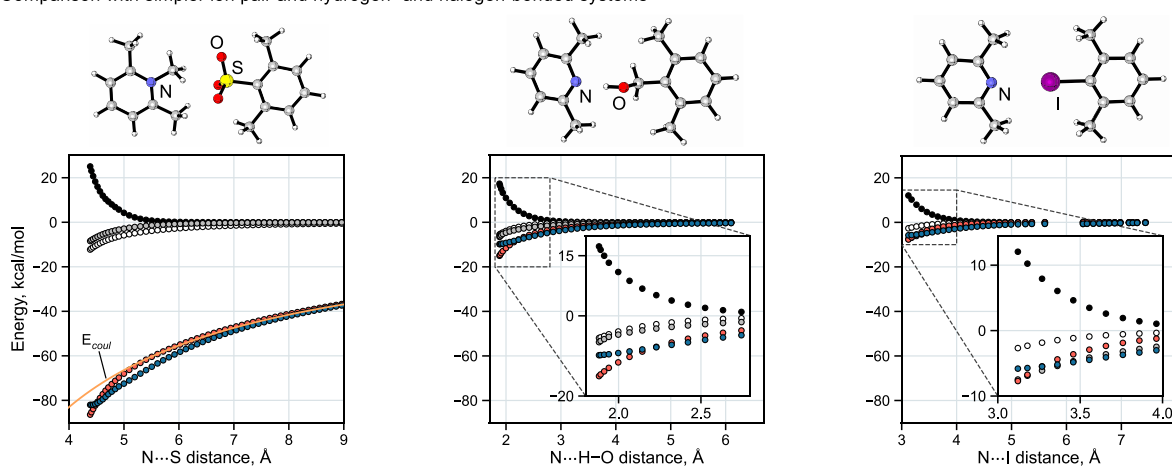

**Figure S2.** Symmetry-Adapted Perturbation Theory (SAPT) analysis of energy components of the interaction energy for directional ionic bonds. For the details of the calculations, see Section 2.12. <sup>a</sup> For comparison with the corresponding structures without the shielding groups, see Section 2.12. <sup>b</sup>  $E_{\text{coul}}$  = electrostatic energy between two point charges at the same distance (given for comparison).

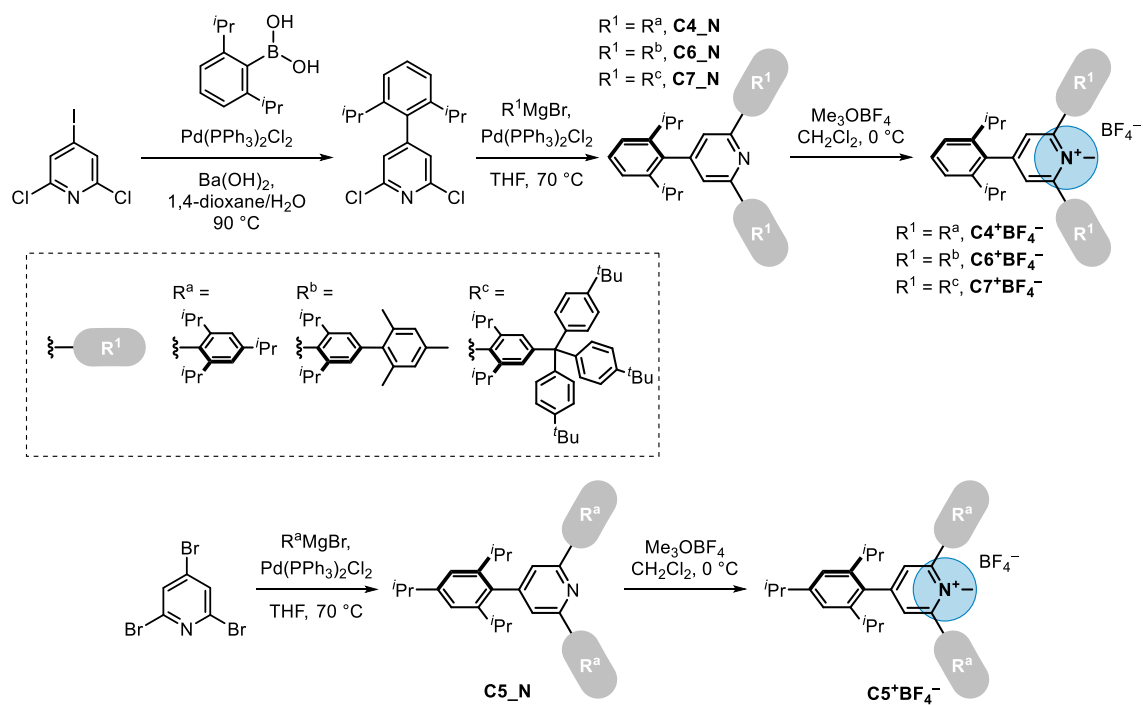

Figure S3. Synthesis of cations present in 1-6.

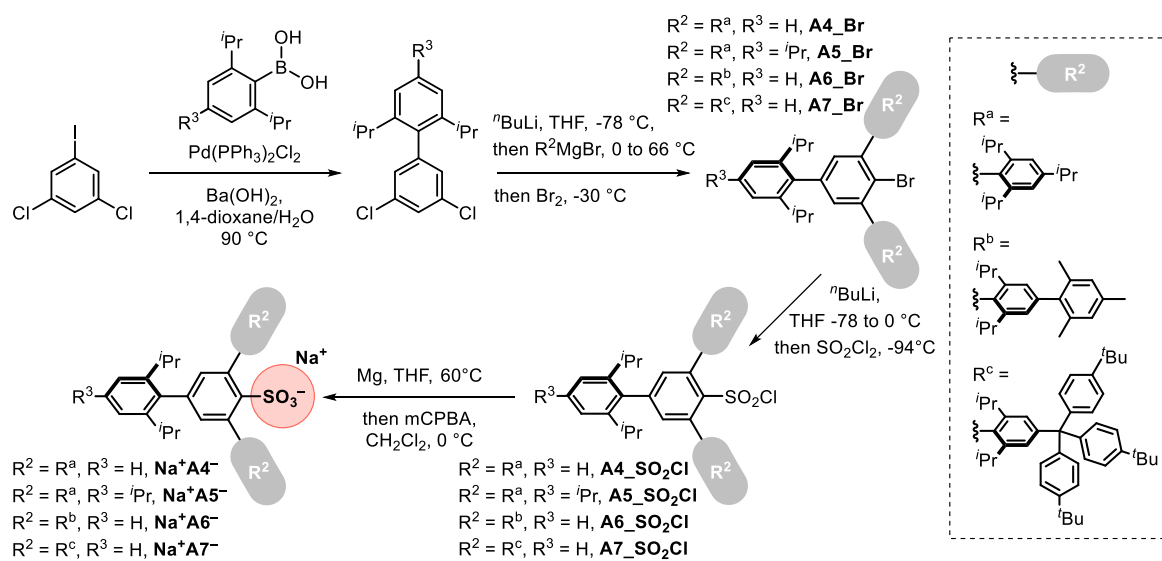

Figure S4. Synthesis of anions present in 1-6.

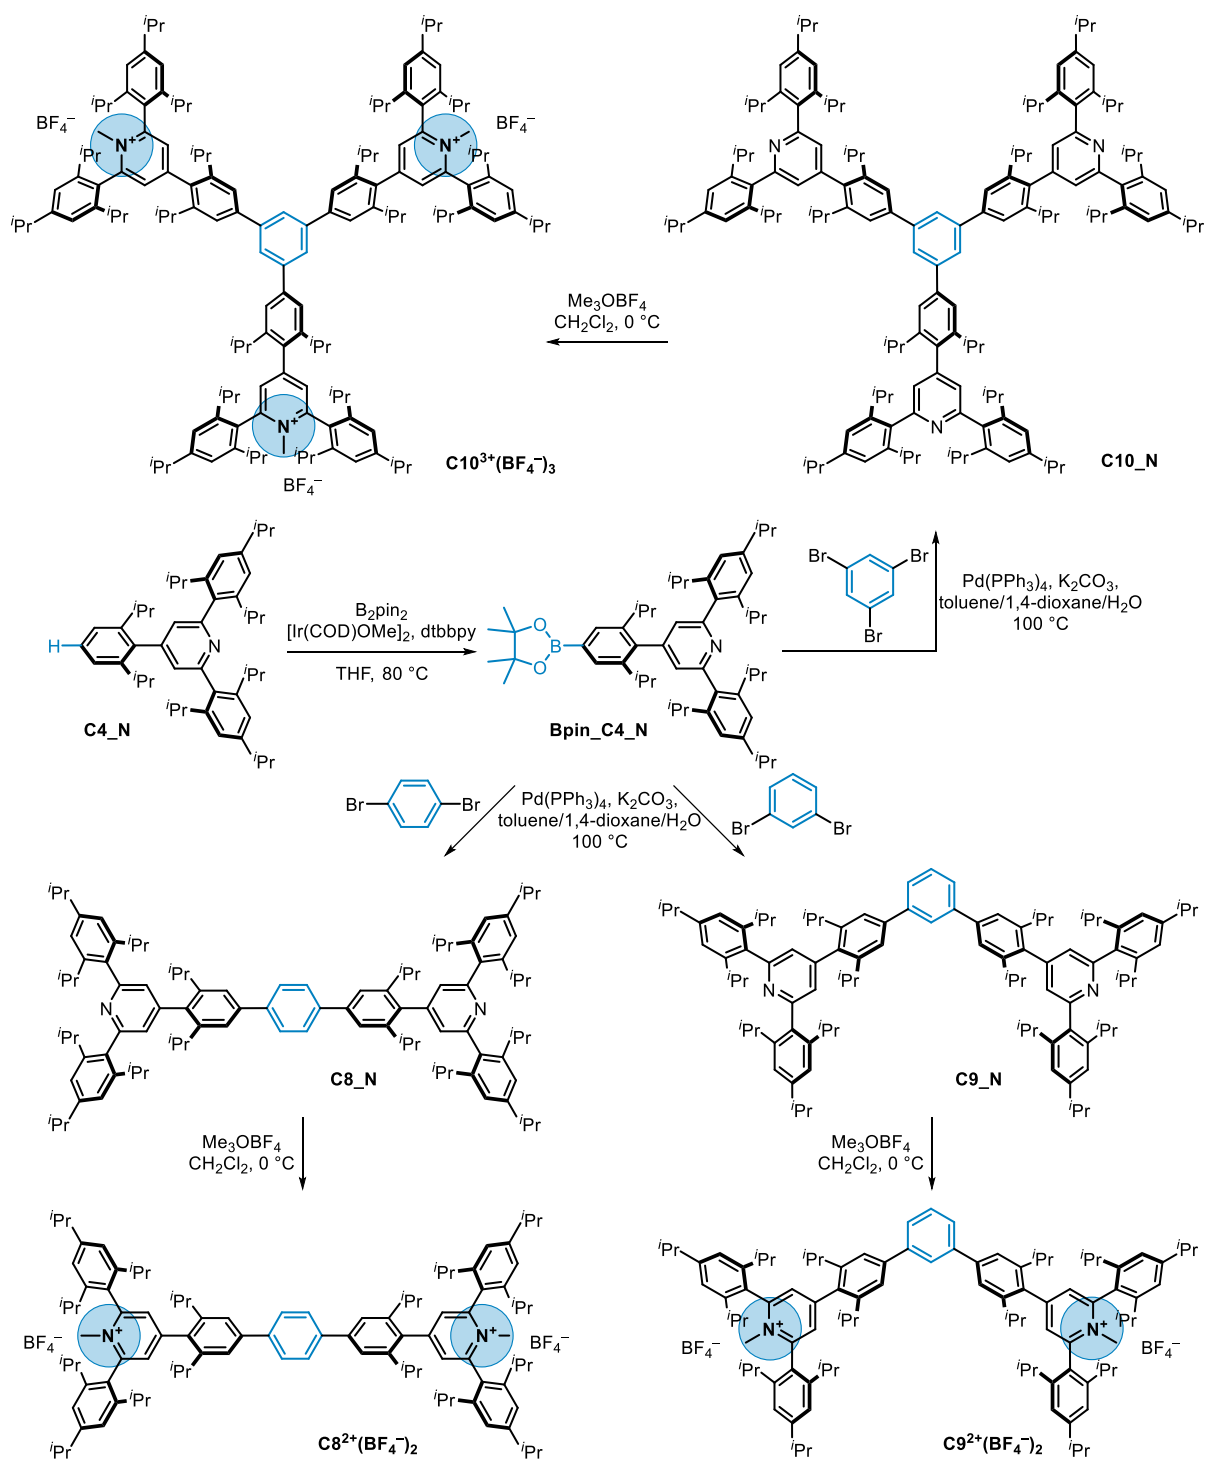

Figure S5. Synthesis of cations present in 7-10.

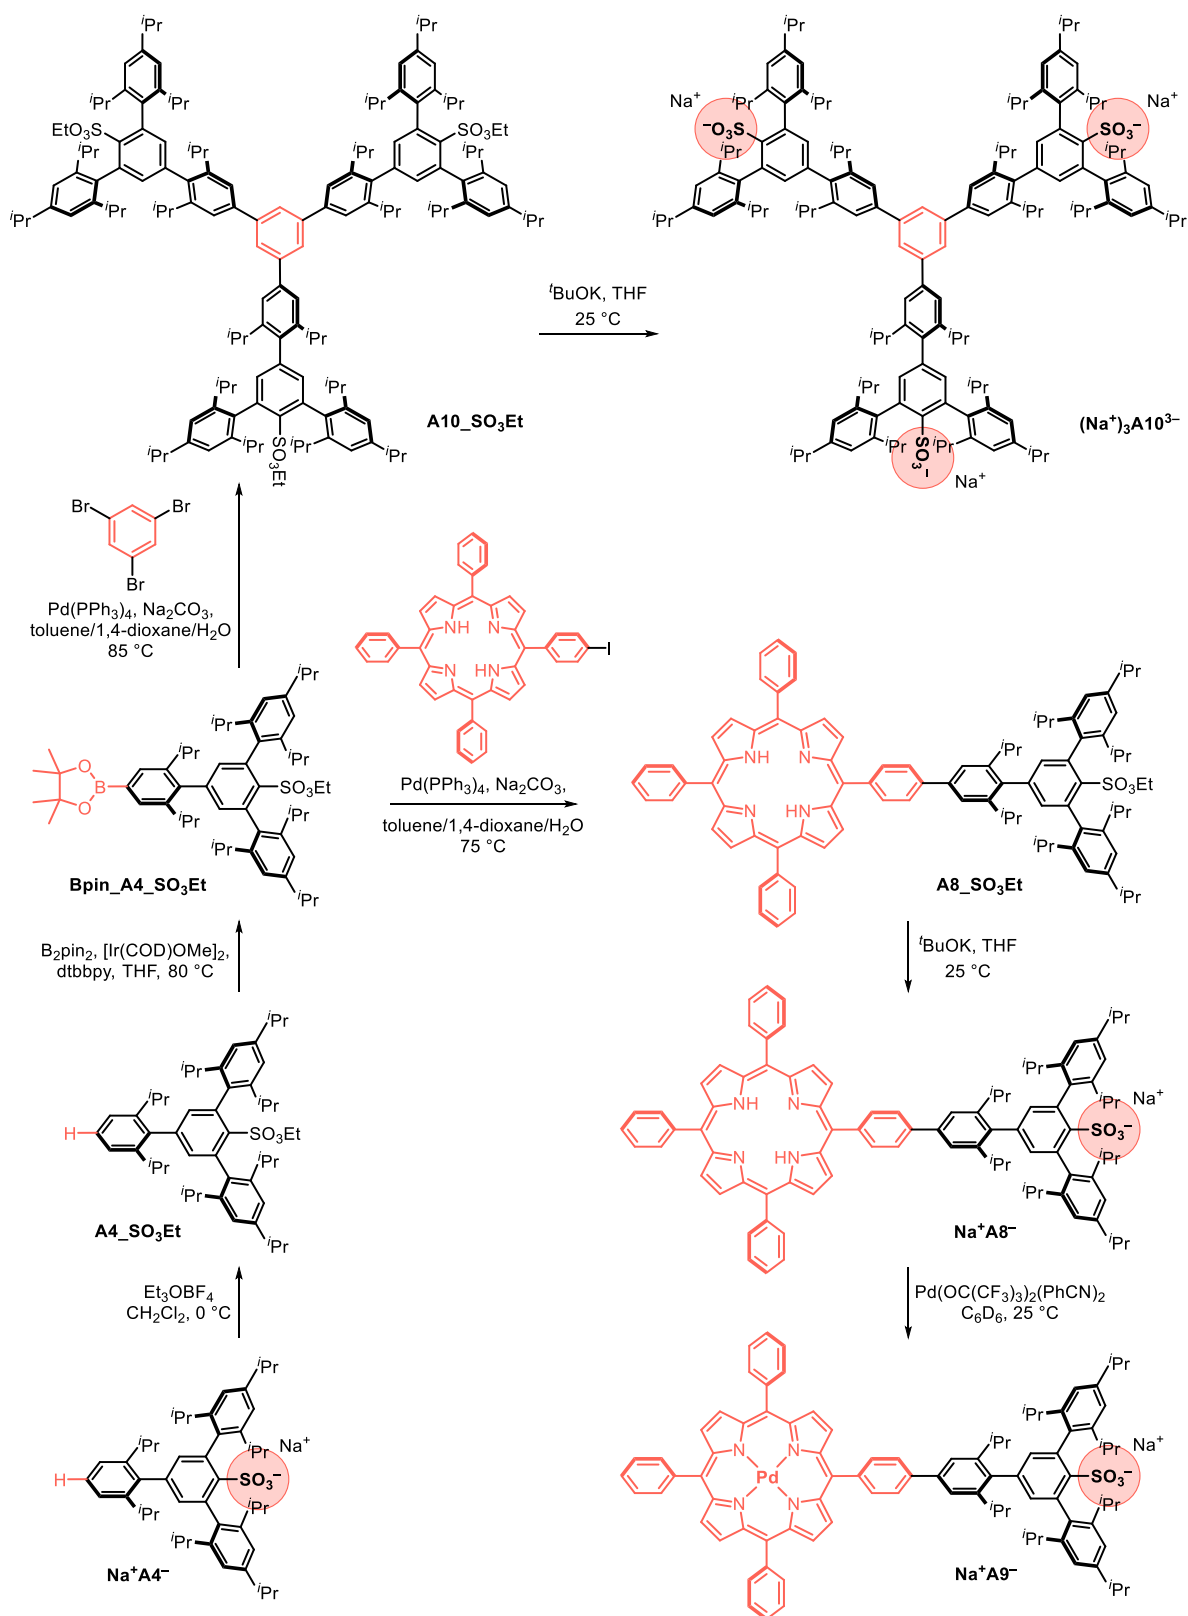

Figure S6. Synthesis of anions present in 9-10.

a) ABCA'B'C' stacking pattern

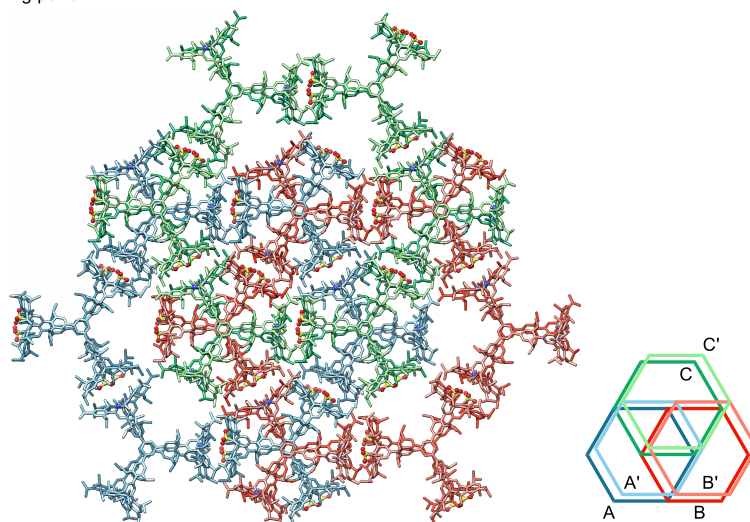

b) ABC layers only

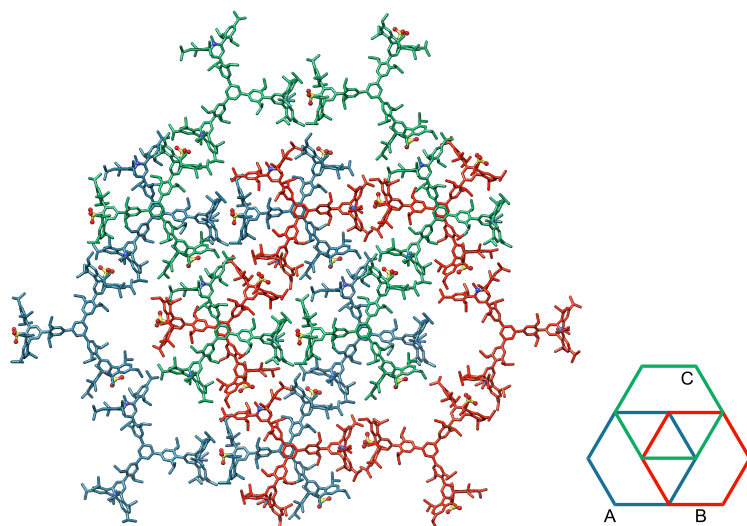

c) Pore and stacking analysis (shown starting from two neighbouring vertices of the hexagon in the A layer)

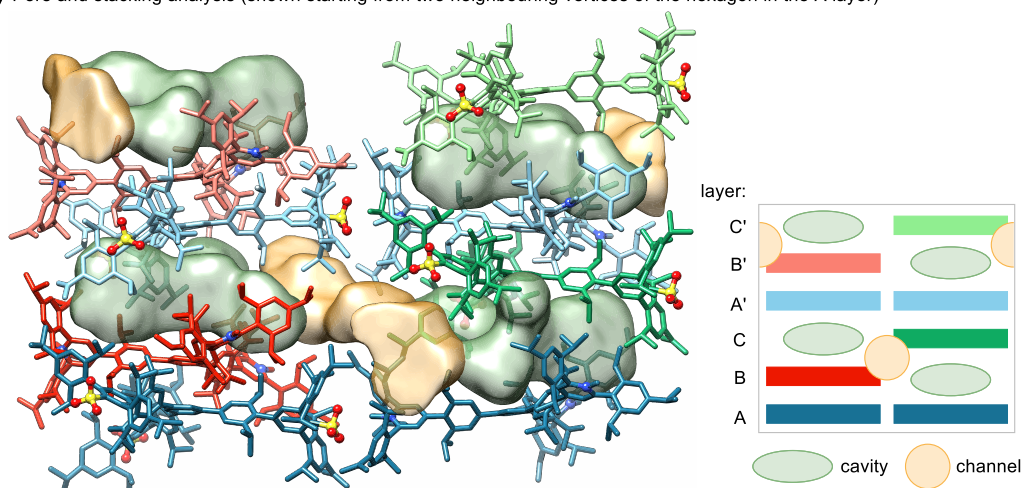

**Figure S7.** Structural analysis of **10**. The A', B', and C' layers are related through a crystallographic c-glide plane to the A, B, and C layers, respectively. The graphics were generated with UCSF Chimera<sup>1</sup> and converted to vector artwork with Adobe Illustrator. The calculation of pores was performed with 3V (outer probe radius, 10.0 Å; inner probe radius, 2.0 Å; the generated surfaces were smoothed for visualization).<sup>2</sup>



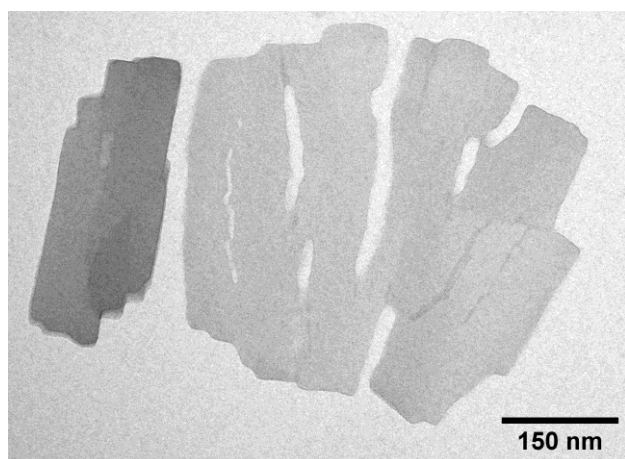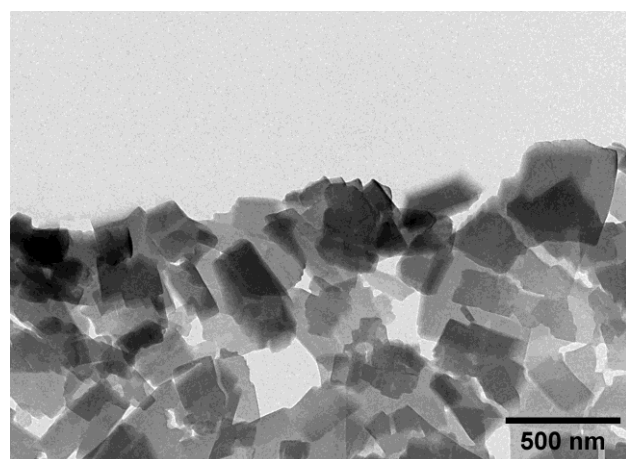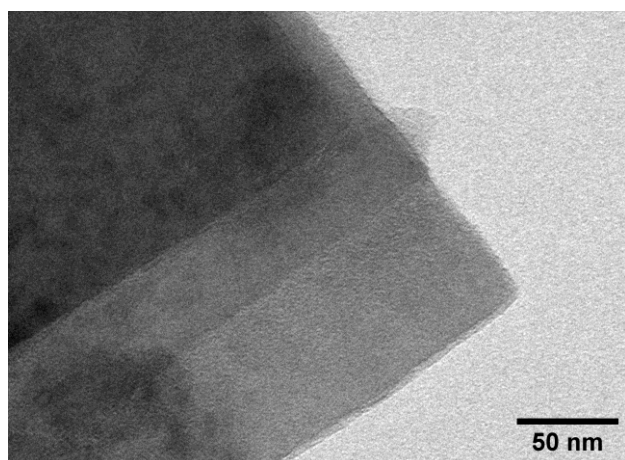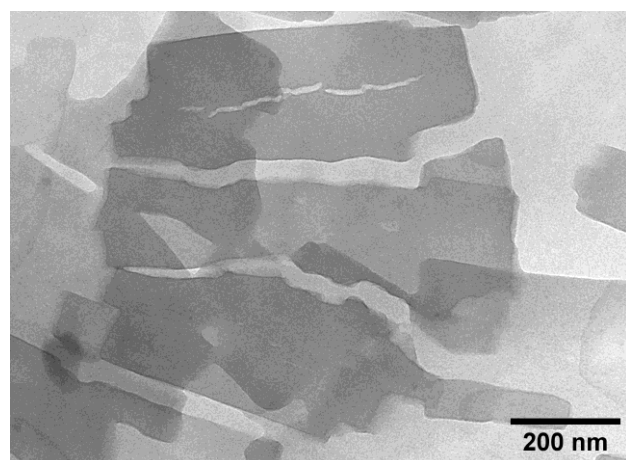

**Figure S8.** TEM images of **10** on a carbon surface.

## 2 Materials and Methods

### 2.1 General information

All reagents were purchased from commercial suppliers (Acros, Fluorochem, Alfa Aesar, Sigma-Aldrich, TCI) and used without further purification unless otherwise noted. Molecular sieves, Celite, and neutral alumina were dried under high vacuum overnight at 200-250 °C and kept in the glovebox. The reactions were carried out under an N<sub>2</sub> atmosphere, either on a Schlenk line or inside a glovebox (H<sub>2</sub>O and O<sub>2</sub> levels below 1 ppm). Glassware was dried at 180 °C for at least 2 h or heated for a few minutes using a heat gun set at 450 °C. The solvents used in the glovebox and for reactions under an inert atmosphere were degassed and purified by distillation over the indicated drying agents, or were purchased from commercial suppliers and used without further drying, as indicated below: THF, Et<sub>2</sub>O (K/benzophenone, stored over 4 Å molecular sieves), CH<sub>2</sub>Cl<sub>2</sub> (CaH<sub>2</sub>, stored over 4 Å molecular sieves), hexane, toluene, benzene (neutral dry alumina, stored over 4 Å molecular sieves). Alternatively, dry THF and CH<sub>2</sub>Cl<sub>2</sub> were purchased from Acros, additionally degassed, and placed on freshly dried molecular sieves. Trimethyloxonium tetrafluoroborate, triethyloxonium tetrafluoroborate, and [Ir(COD)OMe]<sub>2</sub> were weighed into a vial inside a glovebox and added to reaction mixtures without exposure to air. Aqueous solutions of NaBF<sub>4</sub> were prepared fresh before use.

Reactions were monitored by thin-layer chromatography (TLC) analysis on Merck silica gel 60 F254 TLC plates, using visualization by UV irradiation. Aqueous workups were performed under air. Column chromatographic separations were performed using Merck 60 silica gel (40-63µm) and, unless otherwise stated, the samples were loaded as solutions in the eluent.

Nuclear magnetic resonance (NMR) spectra were recorded on Bruker Avance III 500 MHz, Bruker Avance NEO 500 MHz, and Bruker Avance III 400 MHz NMR spectrometers. For ROESY characterizations of ion pairs, dry C<sub>6</sub>D<sub>6</sub>, toluene-*d*<sub>8</sub>, and CDCl<sub>3</sub> were used and the samples were prepared in a glove box. Otherwise, the deuterated solvents were purchased from Apollo Scientific and used from a freshly opened bottle. <sup>1</sup>H and <sup>13</sup>C chemical shifts (δ) are reported in ppm relative to tetramethylsilane, using solvent residual signals as the references: CDCl<sub>3</sub> (7.26 ppm for <sup>1</sup>H NMR and 77.0 ppm for <sup>13</sup>C NMR), C<sub>6</sub>D<sub>6</sub> (7.16 ppm for <sup>1</sup>H NMR and 128.39 ppm for <sup>13</sup>C NMR). <sup>19</sup>F chemical shifts are given in ppm relative to CFCl<sub>3</sub> (external standard, absolute referencing). NMR data were processed using Mestrenova 14.1.2 or TopSpin 4.1.1. Data are reported as follows: chemical shift, multiplicity (s = singlet, d = doublet, t = triplet, q = quartet, quint = quintet, sext = sextet, hept = heptet, m = multiplet, br = broad signal), coupling constants (*J*) and integration.

2D-ROESY NMR spectra were acquired on a Bruker Avance III 500 MHz spectrometer. A pulse sequence with two purge 180° pulses of opposite phase (*roesyphpp.2*) was used to remove the undesirable TOCSY contributions to the integral intensities (mixing times p15 = 400 ms or 600 ms, spin-lock power γB<sub>1</sub> = 5000 Hz). The absence of spin diffusion was determined from the ROE build-up curve. In order to obtain approximate

distances for qualitative comparison, between twelve and fifteen ROE correlations were integrated and the distances were calculated, including the offset-compensated corrections, as described by Cadet *et al.*<sup>3</sup>

High resolution electron ionization mass spectrometry (HR-EI-MS): double-focusing (BE geometry) magnetic sector mass spectrometer DFS (ThermoFisher Scientific, Bremen, Germany); solid probe inlet; EI at 70 eV; source temperature 200 °C; acceleration voltage 5 kV; electric scan mode; mass range e.g. 300–350 m/z at 10'000 resolution (10% valley definition) and scan rate of 100–200 s per decade; mass accuracy  $\leq$  2 ppm after calibration with perfluorokerosene (PFK, Fluorochem, Derbyshire, UK). Liquid chromatography high resolution electrospray ionization mass spectrometry (LC-HR-ESI-MS): Acquity UPLC (Waters, Milford, USA) connected to an Acquity e $\lambda$  diode array detector and a Synapt G2 HR-ESI-QTOF-MS (Waters, Milford, USA); injection of 1  $\mu$ L sample ( $c = ca. 10\text{--}100 \mu\text{g mL}^{-1}$ ); Acquity BEH C18 HPLC column (1.7  $\mu\text{m}$  particle size, 2  $\times$  50 mm, Waters) kept at 30 °C; elution at a flow rate of 400  $\mu\text{L min}^{-1}$  with A: H<sub>2</sub>O + 1% HCO<sub>2</sub>H and B: CH<sub>3</sub>CN + 0.1% HCO<sub>2</sub>H, linear gradient from 5–98% B within 5 min, then isocratic for 1 min;\* UV spectra recorded from 200–600 nm at 1.2 nm resolution and 20 points s<sup>-1</sup>; ESI: positive ionization mode, capillary voltage 3.0 kV, sampling cone 40V, extraction cone 4V, N<sub>2</sub> cone gas 4 L h<sup>-1</sup>, N<sub>2</sub> desolvation gas 800 L min<sup>-1</sup>, source temperature 120°C; mass analyzer in resolution mode: mass range 100–2'000 m/z with a scan rate of 1 Hz; mass calibration < 2 ppm within 50–2'500 m/z with a 5mM aq. soln. of HCO<sub>2</sub>Na, lockmasses: m/z 195.0882 (cafein, 0.7 ng mL<sup>-1</sup>) and 556.2771 (Leucine-enkephalin, 2 ng mL<sup>-1</sup>).

Single crystals suitable for X-ray diffraction analysis were grown under the conditions described for each case. A representative procedure for the handling of crystals: most of the mother liquor was removed from the crystals, a few of which were then picked up with a needle with the help of a drop of oil (Polybutenes, average Mn  $\sim$ 920 by VPO, isobutylene >90 %, viscosity 200 - 235 cSt(100 °C), Sigma-Aldrich). The selected crystals were placed on a glass slide, covered in oil, and immediately transferred to a diffractometer for analysis.

For the generation of the image for **C1<sup>+</sup>A1<sup>-</sup>** (Figure 2b), a CCDC database search was performed with ConQuest,<sup>4</sup> using N-methylpyridinium benzene sulfonate as a substructure search query. The hits were analysed in the Mercury software, where 20 structures were chosen arbitrarily (the refcodes are as follows: POXJAJ, NOQWUO, NOQWOI, IDODIQ02, GEJCEE, FAKBIC, EHAHIH, EHAHIH01, DUSRIT, DUMWEO, DOKSOM, DOKRUR, CIXCIY, CIRMAT, CIMCOS, CESBEI, CEFPEL, CEDVOX, CEDNEG, BUZSAR). All substituents at the pyridinium (usually annulated rings, halogens and small alkyl groups) and benzenesulfonate (usually alkyl groups at position 4) rings were removed and the cations in each structure were overlapped using Chemcraft.<sup>5</sup>

TEM imaging was performed with an FEI Tecnai G2 Spirit (Thermo Fisher Scientific, Eindhoven, The Netherlands) transmission electron microscope at 120 kV. The instrument was equipped with a side-mounted Gatan Orius 1000 CCD camera, and a digital micrograph acquisition software (Ametek GmbH, Unterschleissheim, Germany) was used. The samples were prepared by adding a few  $\mu\text{L}$  of a solution in CH<sub>2</sub>Cl<sub>2</sub>/PhCF<sub>3</sub> 1:1

( $7.8 \cdot 10^{-5}$  M) onto a carbon coated Ni-grid (300 mesh, 5 nm of carbon). The sample was air dried and after 1 minute of incubation, any remaining solvent was completely removed by touching the side of the grid with filter paper. The sample was then coated unidirectionally with 2 or 2.5 nm of tungsten at an angle of  $3^\circ$  by electron beam evaporation in an MED 020 coater (Leica Microsystems, Vienna, Austria).

Thermal gravimetric analyses were carried out on a Netzsch STA 449 F3 Jupiter<sup>®</sup> Thermal Analysis System by heating typically 3-6 mg of the samples from 27 to 370 °C (compounds **3** and **5**) or from 27 to 700 °C (compound **10**) under argon atmosphere at a heating rate of 10 °C/min.

The melting points were measured on a Büchi M-560 Melting Point System at heating rate of 10 °C/min.

Abbreviations used: B<sub>2</sub>pin<sub>2</sub>, bis(pinacolato)diboron; DMF, *N,N*-dimethylformamide; dppf, 1,1'-bis(diphenylphosphino)ferrocene; EtOAc, ethyl acetate; mCPBA, 3-chloroperbenzoic acid; Mes, mesityl (2,4,6-trimethylphenyl); THF, tetrahydrofuran; COD, 1,5-cyclooctadiene; dtbbpy, 4,4'-di-*tert*-butyl-2,2'-dipyridyl; CV, column volume; DOSY, diffusion-ordered NMR spectroscopy; ROESY, rotating frame Overhauser enhancement NMR spectroscopy; ROE, rotating frame Overhauser effect.

## 2.2 Synthesis of cations C2<sup>+</sup> and C3<sup>+</sup>

### Synthesis of C2<sup>+</sup>

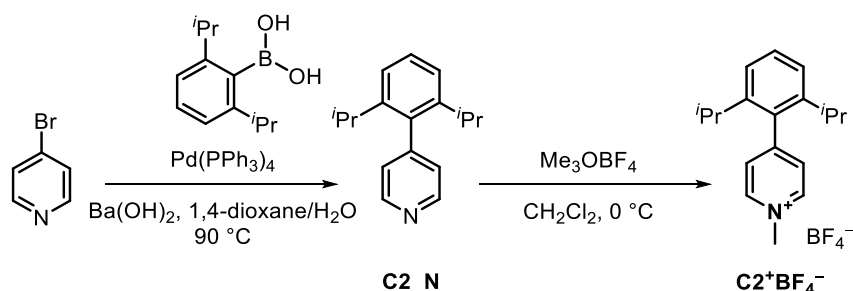

### 4-(2,6-diisopropylphenyl)pyridine (C2\_N)

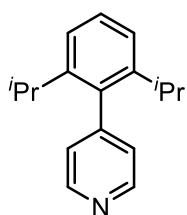

A 25 mL Schlenk flask was loaded with (2,6-diisopropylphenyl)boronic acid (200 mg, 0.97 mmol), 4-bromopyridine hydrochloride (189 mg, 0.97 mmol, 1 equiv.), Pd(PPh<sub>3</sub>)<sub>4</sub> (56 mg, 0.049 mmol, 0.05 equiv.), and Ba(OH)<sub>2</sub>·8H<sub>2</sub>O (673 mg, 2.13 mmol, 2.2 equiv.) and was placed under an inert atmosphere with three vacuum/N<sub>2</sub> cycles. Degassed 1,4-dioxane (3 mL) and degassed H<sub>2</sub>O (2 mL) were added and the resulting suspension was stirred at 90 °C for 18 h. The reaction mixture was allowed to cool to room temperature and NH<sub>4</sub>Cl (sat. aq., 20 mL) and EtOAc (20 mL) were added. The layers were separated and the aqueous layer was extracted with EtOAc (3 x 20 mL). The combined organic extracts were washed with brine (30 mL), dried over Na<sub>2</sub>SO<sub>4</sub>, filtered, and the solvent was removed under reduced pressure. The residue was purified by column chromatography (40 g of silica gel, Et<sub>2</sub>O/CH<sub>2</sub>Cl<sub>2</sub> 1:9) to give the title compound as an off-white solid (150 mg, 65% yield).

<sup>1</sup>H NMR (400 MHz, CDCl<sub>3</sub>) δ 8.69 – 8.64 (m, 2H), 7.38 (t, *J* = 8.1 Hz, 1H), 7.23 (d, *J* = 7.7 Hz, 2H), 7.17 – 7.14 (m, 2H), 2.49 (hept, *J* = 6.9 Hz, 2H), 1.08 (d, *J* = 6.9 Hz, 12H).

<sup>13</sup>C NMR (101 MHz, CDCl<sub>3</sub>) δ 149.7, 149.5, 146.1, 136.7, 128.8, 125.2, 122.9, 30.5, 24.2.

HRMS (ESI+) (*m/z*): [M+H<sup>+</sup>] calculated for C<sub>17</sub>H<sub>22</sub>N, 240.17468; found, 240.17451.

### 4-(2,6-diisopropylphenyl)-1-methylpyridin-1-ium tetrafluoroborate (C2<sup>+</sup>BF<sub>4</sub><sup>-</sup>)

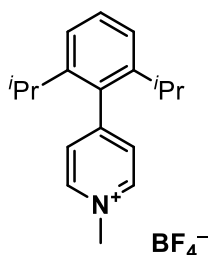

A 3 mL Schlenk flask was loaded with C2\_N (30 mg, 0.125 mmol) and placed under an inert atmosphere with three vacuum/N<sub>2</sub> cycles. Dry CH<sub>2</sub>Cl<sub>2</sub> (0.5 mL) was added and the mixture was cooled to 0 °C. Trimethyloxonium tetrafluoroborate (55.5 mg, 0.375 mmol, 3 equiv.) was added in one portion and the resulting suspension was stirred at 0 °C for 3 h. Then, *N,N*-diisopropylethylamine (0.065 mL, 0.375 mmol, 3 equiv.) was added, followed by the addition of trimethyloxonium tetrafluoroborate (55.5 mg, 0.375 mmol, 3 equiv.), and the mixture was warmed

to room temperature, and stirred for another 30 min. After that, it was separated between CH<sub>2</sub>Cl<sub>2</sub> (5 mL) and H<sub>2</sub>O (5 mL), the aqueous layer was extracted with CH<sub>2</sub>Cl<sub>2</sub> (2 x 5 mL), the combined organic extracts were dried over Na<sub>2</sub>SO<sub>4</sub>, filtered, and the solvent was removed under reduced pressure. The residue was re-dissolved in CH<sub>2</sub>Cl<sub>2</sub> (5 mL) and washed with NaBF<sub>4</sub> (10% aq. soln., 3 x 5 mL). The organic layer was dried over Na<sub>2</sub>SO<sub>4</sub>, filtered, and the solvent was evaporated under reduced pressure. The obtained white solid was washed with cold Et<sub>2</sub>O (10 mL) and dried under high vacuum for 18 h to afford the title compound as an off-white solid (35 mg, 82% yield).

<sup>1</sup>H NMR (400 MHz, CDCl<sub>3</sub>) δ 8.89 (d, *J* = 6.2 Hz, 2H), 7.78 (d, *J* = 6.1 Hz, 2H), 7.45 (t, *J* = 7.8 Hz, 1H), 7.26 (d, *J* = 7.8 Hz, 3H), 4.57 (s, 3H), 2.33 (hept, *J* = 6.8 Hz, 2H), 1.09 (d, *J* = 6.8 Hz, 12H).

<sup>13</sup>C NMR (101 MHz, CDCl<sub>3</sub>) δ 160.2, 145.7, 145.0, 133.2, 130.6, 129.5, 123.6, 48.6, 30.9, 24.1.

<sup>19</sup>F NMR (376 MHz, CDCl<sub>3</sub>) δ -151.91, -151.96.

HRMS (ESI+) (m/z): [M<sup>+</sup>] calculated for C<sub>18</sub>H<sub>24</sub>N, 254.19033; found, 254.19036.

### Synthesis of C3<sup>+</sup>

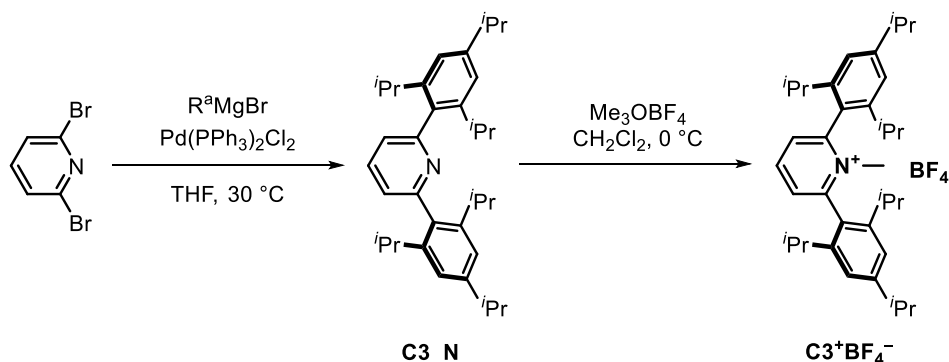

### 2,6-bis(2,4,6-triisopropylphenyl)pyridine (C3\_N)

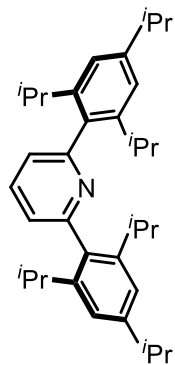

*Part A.* Magnesium (371 mg, 15.45 mmol, 2.57 equiv.) was placed in a Schlenk flask containing a stirring bar. The flask was closed with a septum, evacuated, flame-dried under vacuum for 1 min and left to cool down. Then, the flask was refilled with nitrogen and dry THF (2 mL) was added followed by slow addition of 1,2-dibromoethane (0.05 mL). To activate the magnesium, the mixture was repeatedly briefly heated to reflux with a heat gun. A solution of 1-bromo-2,4,6-triisopropylbenzene (3.74 g, 13.2 mmol, 2.2 equiv.) in dry THF (9 mL) was added dropwise, while maintaining the reflux of the reaction mixture. After that, the flask was sealed and the resulting mixture was stirred at 60 °C for an additional 6 h.

*Part B.* A separate 25 mL Schlenk flask was loaded with 2,6-dibromopyridine (1.42 mg, 6 mmol) and Pd(PPh<sub>3</sub>)<sub>2</sub>Cl<sub>2</sub> (84 mg, 0.12 mmol, 0.02 equiv.), placed under an inert atmosphere with three vacuum/N<sub>2</sub> cycles, and THF (13 mL) was added. The mixture was cooled to – 10 °C, and the Grignard reagent solution from *Part A* was added with a syringe. The resulting suspension was stirred at 60 °C for 15 h. Then, the mixture was cooled to 0 °C and filtered through a filter frit, the precipitate was washed with cold THF (15 mL), H<sub>2</sub>O (5 x 20 mL), and dried under high vacuum, to give the title compound as a light greyish solid (2.48 g, 86% yield).

<sup>1</sup>H NMR (400 MHz, CDCl<sub>3</sub>) δ 7.75 (t, *J* = 7.7 Hz, 1H), 7.24 (d, *J* = 7.9 Hz, 2H), 7.02 (s, 4H), 2.89 (hept, *J* = 6.8 Hz, 2H), 2.58 (hept, *J* = 6.9 Hz, 4H), 1.25 (d, *J* = 6.9 Hz, 12H), 1.11 (d, *J* = 6.9 Hz, 12H), 1.10 (d, *J* = 6.9 Hz, 12H).

<sup>13</sup>C NMR (101 MHz, CDCl<sub>3</sub>) δ 160.1, 148.7, 146.2, 136.9, 135.4, 123.0, 120.6, 34.6, 30.6, 24.7, 24.3, 23.8.

HRMS (ESI+) (*m/z*): [M+H<sup>+</sup>] calculated for C<sub>35</sub>H<sub>50</sub>N, 484.39378; found, 484.39670.

### 1-methyl-2,6-bis(2,4,6-triisopropylphenyl)pyridin-1-ium tetrafluoroborate (C<sub>3</sub><sup>+</sup>BF<sub>4</sub><sup>-</sup>)

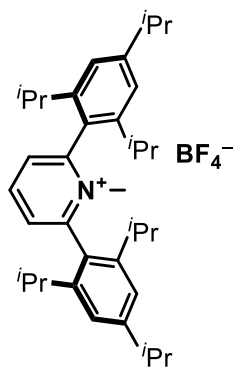

A 10 mL Schlenk flask was loaded with **C<sub>3</sub>\_N** (242 mg, 0.5 mmol) and placed under an inert atmosphere with three vacuum/N<sub>2</sub> cycles. Dry CH<sub>2</sub>Cl<sub>2</sub> (3 mL) was added and the mixture was cooled to 0 °C. Trimethyloxonium tetrafluoroborate (148 mg, 1 mmol, 2 equiv.) was added in one portion and the resulting suspension was stirred at 0 °C for 1 h. Then, H<sub>2</sub>O (3 mL) was added, the aqueous layer was extracted with CH<sub>2</sub>Cl<sub>2</sub> (10 mL, 2 x 5 mL), the combined organic extracts were dried over MgSO<sub>4</sub>, filtered, and the solvent was removed under reduced pressure. The residue was purified by column chromatography (5 g of silica gel, CH<sub>2</sub>Cl<sub>2</sub>, then 5% *i*PrOH in CH<sub>2</sub>Cl<sub>2</sub>), the collected fractions were washed with NaBF<sub>4</sub>

(10% aq. soln., 10 mL), filtered through a filter paper and the solvent was evaporated under reduced pressure to afford the title compound as a colourless solid (242 mg, 83% yield).

<sup>1</sup>H NMR (400 MHz, CDCl<sub>3</sub>) δ 9.12 (t, *J* = 7.9 Hz, 1H), 8.09 (d, *J* = 7.8 Hz, 2H), 7.20 (s, 4H), 3.53 (s, 3H), 2.98 (hept, *J* = 7.0 Hz, 2H), 2.11 (hept, *J* = 6.3 Hz, 4H), 1.31 (d, *J* = 6.9 Hz, 12H), 1.21 (d, *J* = 6.7 Hz, 12H), 1.18 (d, *J* = 6.9 Hz, 12H).

<sup>13</sup>C NMR (101 MHz, CDCl<sub>3</sub>) δ 157.1, 153.6, 147.8, 146.0, 130.8, 126.2, 122.8, 43.1, 34.7, 32.2, 24.9, 24.0, 23.5.

<sup>19</sup>F NMR (376 MHz, CDCl<sub>3</sub>) δ -153.6, -153.6.

HRMS (ESI+) (*m/z*): [M<sup>+</sup>] calculated for C<sub>36</sub>H<sub>52</sub>N, 498.40943; found, 498.41309.

## 2.3 Synthesis of anions A2<sup>-</sup> and A3<sup>-</sup>

### Synthesis of A2<sup>-</sup>

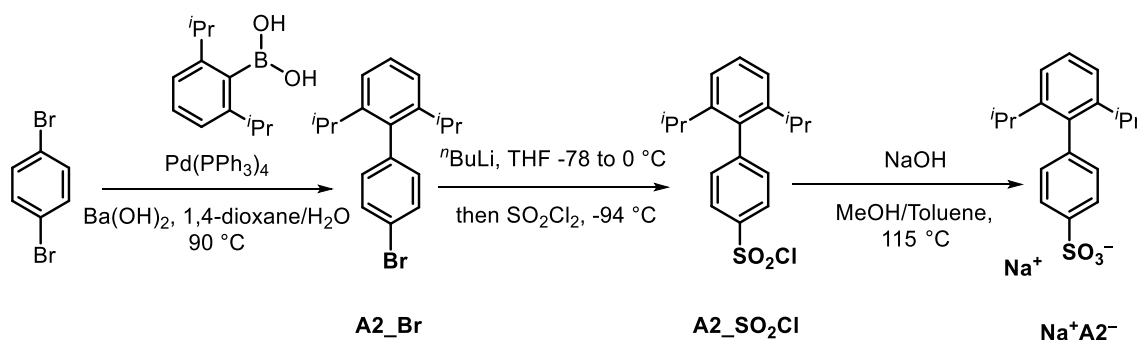

### 4'-bromo-2,6-diisopropyl-1,1'-biphenyl (A2\_Br)

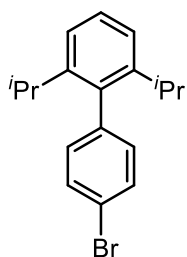

A 25 mL Schlenk flask was loaded with 1,4-dibromobenzene (229 mg, 0.97 mmol), (2,6-diisopropylphenyl)boronic acid (200 mg, 0.97 mmol, 1.0 equiv.), Pd(PPh<sub>3</sub>)<sub>4</sub> (56 mg, 0.049 mmol, 0.05 equiv.), and Ba(OH)<sub>2</sub>·8H<sub>2</sub>O (367 mg, 1.16 mmol, 1.2 equiv.) and was placed under an inert atmosphere with three vacuum/N<sub>2</sub> cycles. Then, degassed 1,4-dioxane (3 mL) and degassed H<sub>2</sub>O (2 mL) were added and the resulting suspension was stirred at 90 °C for 18 h.

Then, the reaction mixture was allowed to cool to room temperature, poured into a sat. aq. solution of NH<sub>4</sub>Cl (20 mL) and extracted with EtOAc (3 x 20 mL). The combined organic extracts were washed with brine (30 mL), dried over Na<sub>2</sub>SO<sub>4</sub>, filtered, and the solvent was removed under reduced pressure. The residue was purified by column chromatography (40 g of silica gel, hexanes, dry loading on 4 g of silica gel) to give the title compound as a colourless solid (180 mg, 59% yield).

<sup>1</sup>H NMR (400 MHz, CDCl<sub>3</sub>) δ 7.58 – 7.52 (m, 2H), 7.36 (t, *J* = 7.8 Hz, 1H), 7.21 (d, *J* = 7.8 Hz, 2H), 7.09 – 7.04 (m, 2H), 2.58 (hept, *J* = 6.9 Hz, 2H), 1.09 (d, *J* = 6.9 Hz, 12H).

<sup>13</sup>C NMR (101 MHz, CDCl<sub>3</sub>) δ 146.9, 139.7, 138.3, 131.41, 131.35, 128.3, 122.7, 120.8, 30.4, 24.2.

HRMS (EI) (*m/z*): [M<sup>+</sup>] calculated for C<sub>18</sub>H<sub>21</sub>Br, 316.08232; found, 316.08211.

### 2',6'-diisopropyl-[1,1'-biphenyl]-4-sulfonyl chloride (A2\_SO<sub>2</sub>Cl)

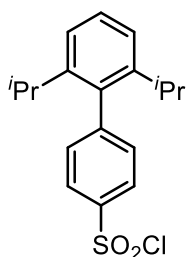

A2\_Br (50 mg, 0.158 mmol) was placed in a flame-dried 3 mL Schlenk flask under a nitrogen atmosphere. Dry THF (0.5 mL) was added and the solution was cooled to -78 °C. *n*-BuLi (2.5 M in hexanes, 0.076 mL, 0.19 mmol, 1.2 equiv.) was added slowly with vigorous stirring. The reaction mixture was stirred for 1 h at -78 °C, then it was cooled to -94 °C using an acetone/liquid N<sub>2</sub> bath and SO<sub>2</sub>Cl<sub>2</sub> (32 mg, 0.019 mL, 0.237 mmol, 1.5 equiv.) was quickly added



in one portion. The reaction mixture was kept stirring at -94 °C for 10 min, then it was taken from the bath and allowed to warm to 0 °C. H<sub>2</sub>O (7 mL) was added and the mixture was extracted with CH<sub>2</sub>Cl<sub>2</sub> (3 x 10 mL). The combined organic fractions were washed with brine (20 mL), dried over Na<sub>2</sub>SO<sub>4</sub>, filtered, and concentrated under reduced pressure. The residue was purified by column chromatography (50 g of silica gel, hexanes/CH<sub>2</sub>Cl<sub>2</sub> 2:1), to provide the title compound (18 mg, 34%) as a yellowish solid.

<sup>1</sup>H NMR (400 MHz, CDCl<sub>3</sub>) δ 8.12 – 8.08 (m, 2H), 7.47 – 7.43 (m, 2H), 7.40 (t, *J* = 7.8 Hz, 1H), 7.25 (d, *J* = 7.8 Hz, 2H), 2.44 (hept, *J* = 7.0 Hz, 2H), 1.10 (d, *J* = 6.9 Hz, 12H).

<sup>13</sup>C NMR (101 MHz, CDCl<sub>3</sub>) δ 149.2, 146.3, 143.0, 136.9, 131.0, 129.1, 126.9, 123.1, 77.5, 77.2, 76.8, 30.6, 24.2.

HRMS (EI) (*m/z*): [M<sup>+</sup>] calculated for C<sub>18</sub>H<sub>21</sub>O<sub>2</sub>ClS, 336.09453; found, 336.09517.

#### Sodium 2',6'-diisopropyl-[1,1'-biphenyl]-4-sulfonate (Na<sup>+</sup>A<sup>2-</sup>)

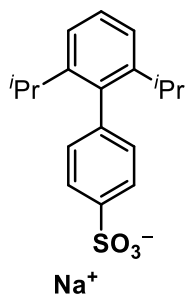

A round bottom flask equipped with a condenser was loaded with **A2\_SO<sub>2</sub>Cl** (30 mg, 0.089 mmol) and toluene (0.5 mL). Then, a solution of NaOH in methanol (2 M in MeOH, 2.5 mL, 50 equiv.) was added, and the reaction mixture was heated at reflux for 5 h. Then, the mixture was cooled to room temperature, diluted with H<sub>2</sub>O (15 mL), and extracted with *i*PrOH/EtOAc 1:5 (3 x 15 mL). The combined extracts were washed with brine (20 mL), dried over Na<sub>2</sub>SO<sub>4</sub>, filtered, and concentrated under reduced pressure. The residue was dried *in vacuo* overnight to afford the title compound as a colourless solid (23 mg, 76% yield).

<sup>1</sup>H NMR (500 MHz, CD<sub>3</sub>OD) δ 7.91 (d, *J* = 7.7 Hz, 2H), 7.32 (t, *J* = 7.8 Hz, 1H), 7.22 (d, *J* = 7.6 Hz, 2H), 7.19 (d, *J* = 7.9 Hz, 2H), 2.56 (hept, *J* = 7.0 Hz, 2H), 1.06 (d, *J* = 6.9 Hz, 12H).

<sup>13</sup>C NMR (126 MHz, CD<sub>3</sub>OD) δ 147.7, 144.9, 144.4, 139.9, 130.6, 129.2, 126.9, 123.6, 31.4, 24.4.

HRMS (ESI-) (*m/z*): [M-Na<sup>+</sup>] calculated for C<sub>18</sub>H<sub>21</sub>O<sub>3</sub>S, 317.12059; found, 317.12936.

## Synthesis of A3<sup>-</sup>

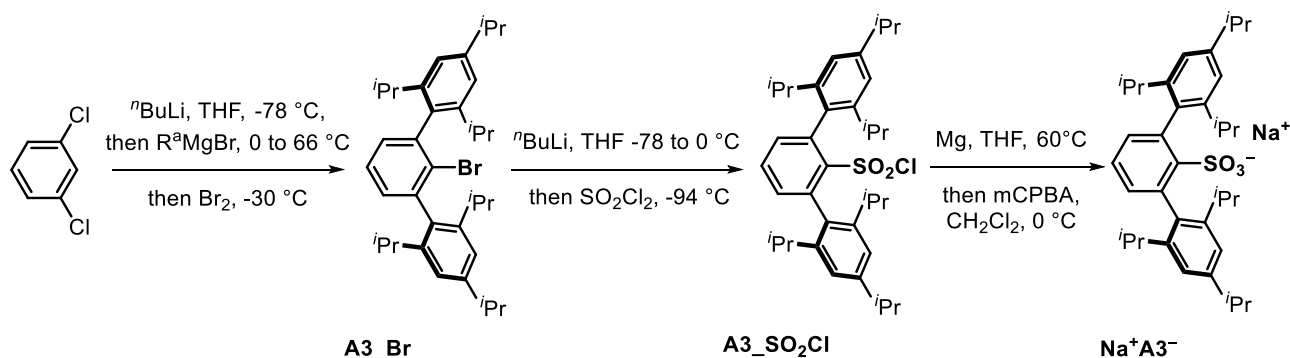

### 2'-bromo-2,2'',4,4'',6,6''-hexaisopropyl-1,1':3',1''-terphenyl (A3\_Br)

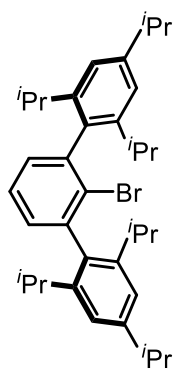

*Part A.* Magnesium (372 mg, 15.5 mmol, 2.9 equiv.) was placed in a Schlenk flask containing a stirring bar. The flask was closed with a septum, evacuated, dried with a heat gun under vacuum for 1 min and left to cool down to room temperature. Then, the flask was refilled with nitrogen and dry THF (1 mL) was added followed by slow addition of 1,2-dibromoethane (0.05 mL). To activate the magnesium, the mixture was repeatedly briefly heated to reflux with a heat gun. A solution of 1-bromo-2,4,6-triisopropylbenzene (3.75 g, 13.25 mmol, 2.5 equiv.) in dry THF (9 mL) was added dropwise while maintaining the reflux of the reaction mixture by occasionally heating the flask with a heat-gun. After that, the flask was sealed and the resulting mixture was stirred at 60 °C for an additional 3 h.

*Part B.* A separate 25 mL Schlenk flask was loaded with 1,3-dichlorobenzene (779 mg, 5.3 mmol) and was placed under an inert atmosphere with three vacuum/N<sub>2</sub> cycles. Dry THF (15 mL) was added, and the solution was cooled to -78 °C. *n*-BuLi (1.6 M in hexanes, 3.3 mL, 5.3 mmol, 1 equiv.) was added dropwise and the mixture was stirred at -78 °C for 1.5 h. Then, the Grignard reagent solution from *Part A* was quickly added with a syringe with vigorous stirring and the resulting solution was heated to 66 °C and stirred at that temperature for 3 h. After that, it was cooled to -30 °C and bromine (0.4 mL, 1.27 g, 7.95 mmol, 1.5 equiv.) was added, the mixture was stirred for 5 min before being warmed to 0 °C. Na<sub>2</sub>SO<sub>3</sub> (sat. aq. soln., 5 mL) was added with vigorous stirring, the mixture was separated between H<sub>2</sub>O (15 mL) and EtOAc (20 mL), the aqueous phase was extracted with EtOAc (2 x 20 mL), the combined organic layers were dried over MgSO<sub>4</sub>, filtered, and the solvent was removed under reduced pressure. The crude material was recrystallized from boiling EtOAc (10 mL) to afford the title compound as a colourless solid (1.14 g, 38%).

<sup>1</sup>H NMR (400 MHz, CDCl<sub>3</sub>) δ 7.36 (t, *J* = 7.4 Hz, 1H), 7.17 (d, *J* = 7.5 Hz, 2H), 7.06 (s, 4H), 2.95 (hept, *J* = 6.8 Hz, 2H), 2.55 (hept, *J* = 6.9 Hz, 4H), 1.31 (d, *J* = 6.9 Hz, 12H), 1.16 (d, *J* = 6.9 Hz, 12H), 1.10 (d, *J* = 6.8 Hz, 12H).

$^{13}\text{C}$  NMR (101 MHz,  $\text{CDCl}_3$ )  $\delta$  148.4, 146.0, 142.5, 136.7, 129.9, 128.6, 126.6, 120.8, 34.3, 31.0, 24.8, 24.2, 23.7.

HRMS (APCI+) (m/z):  $[\text{M}+\text{H}^+]$  calculated for  $\text{C}_{36}\text{H}_{50}\text{Br}$ , 561.3090; found, 561.3090.

### 2,2'',4,4'',6,6''-hexaisopropyl-[1,1':3',1''-terphenyl]-2'-sulfonyl chloride (**A3\_SO<sub>2</sub>Cl**)

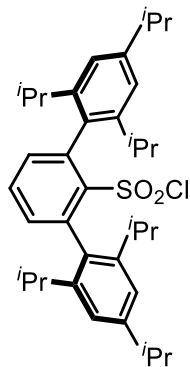

Compound **A3\_Br** (562 mg, 1.0 mmol) was placed in a flame-dried Schlenk flask under a nitrogen atmosphere. Dry THF (10 mL) was added and the mixture was cooled to  $-78\text{ }^\circ\text{C}$ . *n*-BuLi (1.6 M in hexanes, 1.56 mL, 2.5 mmol, 2.5 equiv.) was slowly added with vigorous stirring. The reaction mixture was stirred for 20 min at  $-78\text{ }^\circ\text{C}$  and then placed in an ice-bath, and stirred at  $0\text{ }^\circ\text{C}$  for 15 min. The resulting suspension was cooled to  $-94\text{ }^\circ\text{C}$  and  $\text{SO}_2\text{Cl}_2$  (405 mg, 0.243 mL, 3 mmol, 3 equiv.) was quickly added in one portion. The reaction mixture was kept stirring at  $-94\text{ }^\circ\text{C}$  for 20 min, then it was taken from the bath and allowed to warm

to  $0\text{ }^\circ\text{C}$ .  $\text{H}_2\text{O}$  (5 mL) was added and the mixture was extracted with EtOAc (3 x 10 mL), the combined organic fractions were dried over  $\text{MgSO}_4$ , filtered, and concentrated under reduced pressure. The residue was purified by column chromatography (10 g of silica gel, hexanes 2 CV, then hexanes/ $\text{CH}_2\text{Cl}_2$  95:5 2 CV, then 90:10 2 CV, then 85:15 2 CV) to give the title compound as a colourless solid (286 mg, 49% yield).

$^1\text{H}$  NMR (400 MHz,  $\text{CDCl}_3$ )  $\delta$  7.64 (t,  $J = 7.6$  Hz, 1H), 7.34 (d,  $J = 7.6$  Hz, 2H), 7.05 (s, 4H), 2.94 (hept,  $J = 6.9$  Hz, 2H), 2.48 (hept,  $J = 6.6$  Hz, 4H), 1.30 (d,  $J = 6.9$  Hz, 12H), 1.25 (d,  $J = 6.8$  Hz, 12H), 1.05 (d,  $J = 6.8$  Hz, 12H).

$^{13}\text{C}$  NMR (101 MHz,  $\text{CDCl}_3$ )  $\delta$  148.9, 145.9, 142.21, 142.18, 133.9, 133.3, 132.6, 120.8, 34.3, 31.7, 25.6, 24.2, 23.0.

HRMS (ESI+) (m/z):  $[\text{M}+\text{Na}^+]$  calculated for  $\text{C}_{36}\text{H}_{49}\text{SO}_2\text{Cl}$ , 603.30340; found, 603.30292.

### Sodium 2,2'',4,4'',6,6''-hexaisopropyl-[1,1':3',1''-terphenyl]-2'-sulfonate ( $\text{Na}^+\text{A3}^-$ )

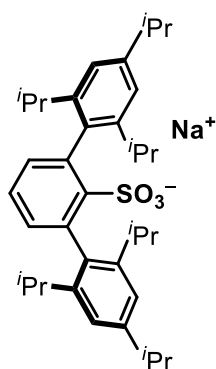

Magnesium (49 mg, 2 mmol, 4.5 equiv.) was placed in a 10 mL Schlenk flask containing a stirring bar. The flask was closed with a septum, evacuated, flame-dried under vacuum for 1 min and left to cool down to room temperature. Then, the flask was refilled with nitrogen and dry THF (0.3 mL) was added followed by slow addition of 1,2-dibromoethane (0.02 mL). To activate the magnesium, the mixture was repeatedly briefly heated to reflux with a heat gun. Then, it was heated to  $60\text{ }^\circ\text{C}$  and a solution of **A3\_SO<sub>2</sub>Cl** (276 mg, 0.447 mmol) in dry THF (3 mL) was added dropwise. The resulting mixture was stirred at  $60\text{ }^\circ\text{C}$

for an additional 1 h, then  $\text{H}_2\text{O}$  (2 mL) was added and the mixture was extracted with EtOAc (4 x 5 mL). The combined organic extracts were dried over  $\text{MgSO}_4$ , filtered, and concentrated under reduced pressure. The residue was dissolved in dry  $\text{CH}_2\text{Cl}_2$  (5 mL) and the solution was cooled to  $0\text{ }^\circ\text{C}$ . Then, 3-chloroperoxybenzoic acid (77%, 125 mg, 0.558 mmol, 1.2 equiv.) was added and the reaction mixture was stirred at  $0\text{ }^\circ\text{C}$  for 0.5 h,

then it was diluted with CH<sub>2</sub>Cl<sub>2</sub> (100 mL), washed with NaOH (1M aq. soln., 6 x 10 mL), dried over MgSO<sub>4</sub>, filtered, and concentrated under reduced pressure. The residue was purified by column chromatography (10 g of silica gel, 5% *i*PrOH in CH<sub>2</sub>Cl<sub>2</sub>, 5 CV; then 10% *i*PrOH in CH<sub>2</sub>Cl<sub>2</sub>, 1 CV), the collected fractions were washed with NaOH (5% aq. soln., 2 x 10 mL), filtered through a filter paper, and concentrated under reduced pressure to give the title compound as a colourless solid (257 mg, 92% yield).

<sup>1</sup>H NMR (400 MHz, CDCl<sub>3</sub>) δ 7.30 (t, *J* = 7.5 Hz, 1H), 7.04 (d, *J* = 7.5 Hz, 2H), 6.92 (s, 4H), 2.85 (hept, *J* = 6.9 Hz, 2H), 2.54 (hept, *J* = 6.6 Hz, 4H), 1.24 (d, *J* = 6.9 Hz, 12H), 1.10 (d, *J* = 6.8 Hz, 12H), 0.96 (d, *J* = 6.9 Hz, 12H).

<sup>13</sup>C NMR (101 MHz, CDCl<sub>3</sub>) δ 147.4, 146.9, 141.0, 139.4, 137.9, 131.3, 128.1, 119.7, 34.1, 31.1, 25.3, 24.3, 23.1.

HRMS (ESI-) (*m/z*): [(*M*-Na<sup>+</sup>)]<sup>-</sup> calculated for C<sub>36</sub>H<sub>49</sub>SO<sub>3</sub>, 561.33969; found, 561.34052.

## 2.4 Synthesis of cations present in 1-6

### 2,6-dichloro-4-(2,6-diisopropylphenyl)pyridine

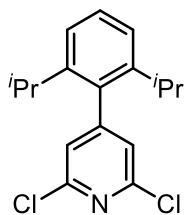

A 100 mL Schlenk flask was loaded with 2,6-dichloro-4-iodopyridine (1 g, 3.65 mmol), (2,6-diisopropylphenyl)boronic acid (0.827 g, 4.02 mmol, 1.1 equiv.), Pd(PPh<sub>3</sub>)<sub>2</sub>Cl<sub>2</sub> (0.128 g, 0.183 mmol, 0.05 equiv.), and Ba(OH)<sub>2</sub>·8H<sub>2</sub>O (2.35 g, 7.3 mmol, 2 equiv.) and was placed under an inert atmosphere with three vacuum/N<sub>2</sub> cycles. Degassed 1,4-dioxane (12 mL) and degassed H<sub>2</sub>O (5 mL) were added and the resulting suspension was stirred at 90 °C for 18 h. The reaction mixture was allowed to cool to room temperature and NH<sub>4</sub>Cl (sat. aq. soln. 50 mL) and EtOAc (50 mL) were added. The layers were separated and the aqueous layer was extracted with EtOAc (3 x 50 mL). The combined organic extracts were washed with brine (100 mL), dried over Na<sub>2</sub>SO<sub>4</sub>, filtered, and the solvent was removed under reduced pressure. The residue was purified by column chromatography (150 g of silica gel, hexanes/CH<sub>2</sub>Cl<sub>2</sub> 1:1) to give the title compound as a colourless solid (843 mg, 75% yield).

<sup>1</sup>H NMR (500 MHz, CDCl<sub>3</sub>) δ 7.39 (t, *J* = 7.8 Hz, 1H), 7.23 (d, *J* = 7.8 Hz, 2H), 7.13 (s, 2H), 2.46 (hept, *J* = 6.8 Hz, 2H), 1.11 (d, *J* = 6.8 Hz, 12H).

<sup>13</sup>C NMR (126 MHz, CDCl<sub>3</sub>) δ 155.3, 150.6, 146.0, 134.3, 129.5, 124.0, 123.2, 30.6, 24.2.

HRMS (ESI+) (*m/z*): [M+H<sup>+</sup>] calculated for C<sub>17</sub>H<sub>20</sub>NCl<sub>2</sub>, 308.09673; found, 308.09692.

### 4-(2,6-diisopropylphenyl)-2,6-bis(2,4,6-triisopropylphenyl)pyridine (C4\_N)

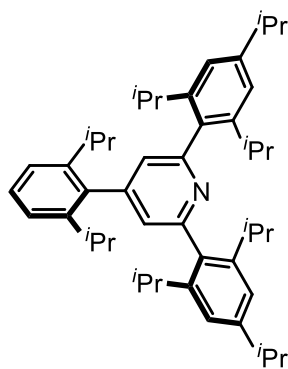

*Part A.* Magnesium (0.441 g, 18.4 mmol, 3.15 equiv.) was placed in a 100 mL Schlenk flask containing a stirring bar. The flask was closed with a septum, evacuated, flame-dried under vacuum for 1 min and left to cool down. Then, the flask was refilled with nitrogen and dry THF (2 mL) was added followed by slow addition of 1,2-dibromoethane (0.05 mL). To activate the magnesium, the mixture was repeatedly briefly heated to reflux with a heat gun. A solution of 1-bromo-2,4,6-triisopropylbenzene (3.97 g, 14 mmol, 2.4 equiv) in dry THF (15 mL) was added dropwise while maintaining the reflux of the reaction mixture. After that, the flask was sealed and the resulting mixture was stirred at 70 °C for an additional 24 h.

*Part B.* A 100 mL Schlenk flask was loaded with 2,6-dichloro-4-(2,6-diisopropylphenyl)pyridine (1.8 g, 5.84 mmol) and Pd(PPh<sub>3</sub>)<sub>2</sub>Cl<sub>2</sub> (0.246 g, 0.35 mmol, 0.06 equiv.) and was placed under an inert atmosphere with three vacuum/N<sub>2</sub> cycles. Dry THF (18 mL) was added, followed by quick addition of the Grignard reagent solution from *Part A* with vigorous stirring. The resulting suspension was stirred at 70 °C for 18 h. Then, the mixture was allowed to cool to room temperature, and NH<sub>4</sub>Cl (sat. aq. soln. 100 mL) and EtOAc (100 mL) were added.

The layers were separated and the aqueous layer was extracted with EtOAc (3 x 100 mL). The combined organic extracts were washed with brine (100 mL), dried over Na<sub>2</sub>SO<sub>4</sub>, filtered, and the solvent was removed under reduced pressure. The residue was purified by column chromatography (200 g of silica gel, hexanes/CH<sub>2</sub>Cl<sub>2</sub> 1:1) to give the title compound as a colourless solid (3.4 g, 90% yield).

<sup>1</sup>H NMR (500 MHz, CDCl<sub>3</sub>) δ 7.37 (t, *J* = 7.7 Hz, 1H), 7.22 (d, *J* = 7.8 Hz, 2H), 7.15 (s, 2H), 7.03 (s, 4H), 2.91 (hept, *J* = 6.9 Hz, 2H), 2.83 – 2.68 (m, 6H), 1.26 (d, *J* = 6.9 Hz, 12H), 1.19 (d, *J* = 6.9 Hz, 12H), 1.13 (d, *J* = 6.9 Hz, 12H, overlapped), 1.12 (d, *J* = 6.9 Hz, 12H, overlapped).

<sup>13</sup>C NMR (126 MHz, CDCl<sub>3</sub>) δ 159.9, 148.9, 146.11, 146.09, 136.9, 136.7, 128.6, 124.5, 122.8, 120.6, 34.6, 30.9, 30.8, 24.7, 24.3, 24.2, 23.6.

HRMS (ESI+) (*m/z*): [M+H<sup>+</sup>] calculated for C<sub>47</sub>H<sub>66</sub>N, 644.51898; found, 644.51916.

**4-(2,6-diisopropylphenyl)-1-methyl-2,6-bis(2,4,6-triisopropylphenyl)pyridin-1-ium tetrafluoroborate (C<sub>4</sub><sup>+</sup>BF<sub>4</sub><sup>-</sup>)**

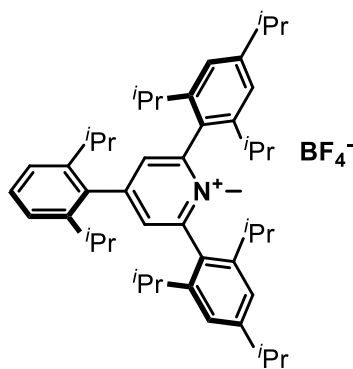

A 10 mL Schlenk flask was loaded with **C4\_N** (200 mg, 0.311 mmol) and placed under an inert atmosphere with three vacuum/N<sub>2</sub> cycles. Dry CH<sub>2</sub>Cl<sub>2</sub> (4 mL) was added and the mixture was cooled to 0 °C. Trimethyloxonium tetrafluoroborate (230 mg, 1.56 mmol, 5 equiv.) was added in one portion and the resulting suspension was stirred at 0 °C for 3 h. Then, *N,N*-diisopropylethylamine (201 mg, 0.271 mL, 1.56 mmol, 5 equiv.) was added, followed by the addition of trimethyloxonium tetrafluoroborate (230 mg, 1.56 mmol, 5 equiv),

and the mixture was allowed to warm to room temperature, and stirred for another 30 min. After that, it was separated between CH<sub>2</sub>Cl<sub>2</sub> (20 mL) and H<sub>2</sub>O (20 mL), the aqueous layer was extracted with CH<sub>2</sub>Cl<sub>2</sub> (2 x 20 mL), the combined organic extracts were dried over Na<sub>2</sub>SO<sub>4</sub>, filtered, and the solvent was removed under reduced pressure. The residue was purified by column chromatography (25 g of silica gel, CH<sub>2</sub>Cl<sub>2</sub>, 0.5 CV; then 10% *i*PrOH in CH<sub>2</sub>Cl<sub>2</sub>, 2 CV), the collected fractions were washed with NaBF<sub>4</sub> (10% aq. soln., 50 mL), filtered through a filter paper, and the solvent was evaporated under reduced pressure. The title compound was obtained as an off-white solid (198 mg, 85% yield).

<sup>1</sup>H NMR (500 MHz, CDCl<sub>3</sub>) δ 7.78 (s, 2H), 7.47 (t, *J* = 7.8 Hz, 1H), 7.28 (d, *J* = 7.8 Hz, 2H), 7.22 (s, 4H), 3.76 (s, 3H), 2.99 (hept, *J* = 6.9 Hz, 2H), 2.46 (hept, *J* = 6.8 Hz, 2H), 2.19 (hept, *J* = 6.8 Hz, 4H), 1.32 (d, *J* = 6.8 Hz, 12H), 1.30 (d, *J* = 6.9 Hz, 12H), 1.20 (d, *J* = 6.8 Hz, 12H), 1.17 (d, *J* = 6.8 Hz, 12H).

<sup>13</sup>C NMR (126 MHz, CDCl<sub>3</sub>) δ 159.6, 157.6, 154.2, 145.7, 145.0, 132.0, 131.04, 131.03, 125.5, 123.7, 123.0, 43.8, 34.6, 32.8, 31.7, 24.9, 24.1, 23.9, 23.4.

$^{19}\text{F}$  NMR (471 MHz,  $\text{CDCl}_3$ )  $\delta$  -154.47, -154.52.

HRMS (ESI+) (m/z):  $[\text{M}^+]$  calculated for  $\text{C}_{48}\text{H}_{68}\text{N}$ , 658.53463; found, 658.53302.

### 2,4,6-tris(2,4,6-triisopropylphenyl)pyridine (C5\_N)

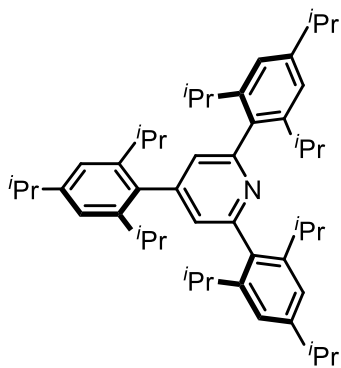

*Part A.* Magnesium (0.63 g, 26.2 mmol, 5.0 equiv.) was placed in a 100 mL Schlenk flask containing a stirring bar. The flask was closed with a septum, evacuated, flame-dried under vacuum for 1 min and left to cool down. Then, the flask was refilled with nitrogen and dry THF (2 mL) was added followed by slow addition of 1,2-dibromoethane (0.05 mL). To activate the magnesium, the mixture was repeatedly briefly heated to reflux with a heat gun. A solution of 1-bromo-2,4,6-triisopropylbenzene (5.39 g, 19.0 mmol, 3.6 equiv.) in dry THF (28 mL) was added dropwise while maintaining the reflux of the reaction mixture. After that, the flask was sealed and the resulting mixture was stirred at 70 °C for an additional 24 h.

*Part B.* A separate 100 mL Schlenk flask was loaded with 2,4,6-tribromopyridine (1.7 g, 5.28 mmol) and  $\text{Pd}(\text{PPh}_3)_2\text{Cl}_2$  (0.371 g, 0.529 mmol, 0.1 equiv.) and was placed under an inert atmosphere with three vacuum/ $\text{N}_2$  cycles. Dry THF (20 mL) was added, followed by quick addition of the Grignard reagent solution from *Part A* with vigorous stirring. The resulting suspension was stirred at 70 °C for 18 h. Then, the mixture was allowed to cool to room temperature, and  $\text{NH}_4\text{Cl}$  (sat. aq. soln. 100 mL) and EtOAc (100 mL) were added. The layers were separated and the aqueous layer was extracted with EtOAc (3 x 100 mL). The combined organic extracts were washed with brine (200 mL), dried over  $\text{Na}_2\text{SO}_4$ , filtered, and the solvent was removed under reduced pressure. The residue was purified by column chromatography (200 g of silica gel, hexanes/ $\text{CH}_2\text{Cl}_2$  1:1) to give the title compound as a white solid (2.2 g, 61% yield).

$^1\text{H}$  NMR (400 MHz,  $\text{CDCl}_3$ )  $\delta$  7.14 (s, 2H), 7.07 (s, 2H), 7.02 (s, 4H), 2.98 – 2.85 (hept,  $J = 6.9$  Hz, 2H + hept,  $J = 6.9$  Hz, 1H), 2.82 – 2.70 (hept,  $J = 6.9$  Hz, 4H + hept,  $J = 6.9$  Hz, 2H), 1.30 (d,  $J = 6.9$  Hz, 6H), 1.25 (d,  $J = 6.9$  Hz, 12H), 1.18 (d,  $J = 6.9$  Hz, 12H), 1.13 (d,  $J = 6.9$  Hz, 12H), 1.11 (d,  $J = 6.9$  Hz, 12H).

$^{13}\text{C}$  NMR (101 MHz,  $\text{CDCl}_3$ )  $\delta$  159.9, 148.9, 148.8, 148.7, 146.1, 145.9, 136.8, 134.6, 124.7, 120.8, 120.5, 34.6, 34.4, 30.84, 30.76, 24.7, 24.3, 24.21, 24.17, 23.6.

HRMS (ESI+) (m/z):  $[\text{M}+\text{H}^+]$  calculated for  $\text{C}_{50}\text{H}_{72}\text{N}$ , 686.56593; found, 686.56624.

**1-methyl-2,4,6-tris(2,4,6-triisopropylphenyl)pyridin-1-ium tetrafluoroborate (C<sub>5</sub><sup>+</sup>BF<sub>4</sub><sup>-</sup>)**

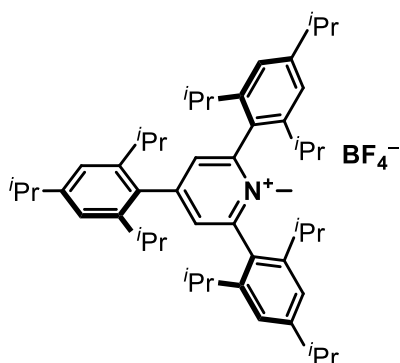

A 50 mL Schlenk flask was loaded with **C5\_N** (1 g, 1.46 mmol) and placed under an inert atmosphere with three vacuum/N<sub>2</sub> cycles. Dry CH<sub>2</sub>Cl<sub>2</sub> (15 mL) was added and the mixture was cooled to 0 °C. Trimethyloxonium tetrafluoroborate (1.08 g, 7.3 mmol, 5 equiv.) was added in one portion and the resulting suspension was stirred at 0 °C for 3 h. Then, *N,N*-diisopropylethylamine (0.943 g, 1.27 mL, 7.3 mmol, 5 equiv.) was added, followed by the addition of trimethyloxonium tetrafluoroborate (1.08 g, 7.3 mmol,

5 equiv), and the mixture was warmed to room temperature and stirred for another 30 min. After that, it was separated between CH<sub>2</sub>Cl<sub>2</sub> (50 mL) and H<sub>2</sub>O (50 mL), the aqueous layer was extracted with CH<sub>2</sub>Cl<sub>2</sub> (2 x 50 mL), the combined organic extracts were dried over Na<sub>2</sub>SO<sub>4</sub>, filtered, and the solvent was removed under reduced pressure. The residue was purified by column chromatography (150 g of silica gel, CH<sub>2</sub>Cl<sub>2</sub>, 1 CV; then 10% *i*PrOH in CH<sub>2</sub>Cl<sub>2</sub>, 2 CV), the collected fractions were washed with NaBF<sub>4</sub> (10% aq. soln., 50 mL), filtered through a filter paper and the solvent was evaporated under reduced pressure. The obtained colourless solid was recrystallized from hot toluene/hexanes 1:10 (15 mL), the precipitate was washed with cold Et<sub>2</sub>O (2 x 10 mL) and dried under high vacuum for 18 h to afford the title compound as an off-white solid (0.96 g, 83% yield).

<sup>1</sup>H NMR (500 MHz, CDCl<sub>3</sub>) δ 7.76 (s, 2H), 7.22 (s, 4H), 7.10 (s, 2H), 3.75 (s, 3H), 2.99 (hept, *J* = 6.9 Hz, 2H), 2.92 (hept, *J* = 6.9 Hz, 1H), 2.47 (hept, *J* = 6.9 Hz, 2H), 2.19 (hept, *J* = 6.9 Hz, 4H), 1.32 (d, *J* = 6.9 Hz, 12H), 1.30 (d, *J* = 6.9 Hz, 12H), 1.25 (d, *J* = 6.9 Hz, 6H), 1.19 (d, *J* = 6.9 Hz, 12H), 1.17 (d, *J* = 6.9 Hz, 12H).

<sup>13</sup>C NMR (126 MHz, CDCl<sub>3</sub>) δ 160.1, 157.4, 154.1, 151.9, 145.7, 145.0, 131.3, 129.7, 125.5, 123.0, 121.6, 43.7, 34.64, 34.57, 32.8, 31.7, 24.9, 24.1, 24.0, 23.9, 23.4.

<sup>19</sup>F NMR (471 MHz, CDCl<sub>3</sub>) δ -154.74, -154.79.

HRMS (ESI+) (*m/z*): [M<sup>+</sup>] calculated for C<sub>51</sub>H<sub>74</sub>N, 700.58158; found, 700.58008.



## Synthesis of R<sup>b</sup>-Br

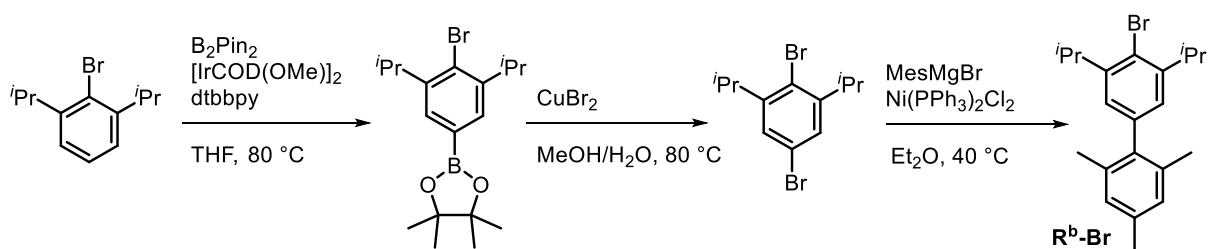

### 2-(4-bromo-3,5-diisopropylphenyl)-4,4,5,5-tetramethyl-1,3,2-dioxaborolane

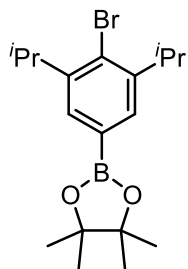

A flame dried 50 mL Schlenk flask was loaded with (1,5-cyclooctadiene)(methoxy)iridium(I) dimer (13.2 mg, 0.02 mmol, 0.0002 equiv.) in an N<sub>2</sub>-filled glovebox. Then, the flask was taken out and bis(pinacolato)diboron (3.05 g, 12 mmol, 1.2 equiv.) and 4,4'-di-tert-butyl-2,2'-bipyridyl (10.8 mg, 0.04 mmol, 0.0004 equiv.) were added, followed by the addition of 2-bromo-1,3-diisopropylbenzene (2.41 g, 2.06 mL, 10 mmol) and dry THF (5 ml) under an N<sub>2</sub>

atmosphere. The flask was sealed and the resulting mixture was stirred at 80 °C for 20 h. Then, the mixture was allowed to cool to room temperature and concentrated under reduced pressure. The residue was purified by column chromatography (30 g of silica gel, hexanes, 1.5 CV; then hexanes/EtOAc 95:5, 1.5 CV; then hexanes/EtOAc 90:10, 1.5 CV) to give the title compound as a colourless solid (3.34 g, 91% yield).

<sup>1</sup>H NMR (400 MHz, CDCl<sub>3</sub>) δ 7.54 (s, 2H), 3.51 (hept, *J* = 6.8 Hz, 2H), 1.35 (s, 12H), 1.27 (d, *J* = 6.9 Hz, 12H).

<sup>13</sup>C NMR (101 MHz, CDCl<sub>3</sub>) δ 147.2, 130.7, 130.6, 84.0, 33.8, 25.0, 23.2.

HRMS (ESI+) (*m/z*): [M+NH<sub>4</sub><sup>+</sup>] calculated for C<sub>18</sub>H<sub>32</sub>BBrNO<sub>2</sub>, 384.17040; found, 384.17125.

### 2,5-dibromo-1,3-diisopropylbenzene

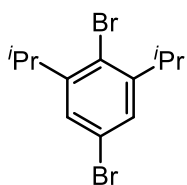

The reaction was performed under air. 2-(4-bromo-3,5-diisopropylphenyl)-4,4,5,5-tetramethyl-1,3,2-dioxaborolane (6.72 g, 18.3 mmol) and CuBr<sub>2</sub> (12.3 g, 54.9 mmol, 3 equiv.) were placed in a 500 mL Schlenk flask. MeOH (130 mL) and H<sub>2</sub>O (130 mL) were added, the flask was sealed, and the mixture was stirred at 80 °C for 7 days. Then, it was cooled to

room temperature, diluted with H<sub>2</sub>O (150 mL), and extracted with CH<sub>2</sub>Cl<sub>2</sub> (3 x 200 mL). The combined organic extracts were dried over MgSO<sub>4</sub>, filtered, and the solvent was removed under reduced pressure. The residue was purified by column chromatography (500 g of silica gel, hexanes) to give the title compound as a colourless oil (5.15 g, 88% yield). The <sup>1</sup>H NMR analysis was in accordance with the previously reported data.<sup>6</sup>

#### 4'-bromo-3',5'-diisopropyl-2,4,6-trimethyl-1,1'-biphenyl (R<sup>b</sup>-Br)

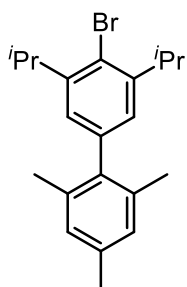

*Part A.* Magnesium (277 mg, 11.4 mmol, 2 equiv.) was placed in a Schlenk flask containing a stirring bar. The flask was closed with a septum, evacuated, flame-dried under vacuum for 1 min and left to cool to room temperature. Then, the flask was refilled with nitrogen and dry Et<sub>2</sub>O (2 mL) was added, followed by slow addition of 1,2-dibromoethane (0.1 mL). To activate the magnesium, the mixture was repeatedly briefly heated to reflux with a heat gun.

A solution of 2-bromo-1,3,5-trimethylbenzene (1.67 g, 8.39 mmol, 1.5 equiv.) in dry Et<sub>2</sub>O (8 mL) was added dropwise while maintaining the reflux of the reaction mixture. After that, the flask was sealed and the resulting mixture was stirred at 40 °C for an additional 23 h.

*Part B.* A separate 100 mL Schlenk flask was placed under an N<sub>2</sub> atmosphere and loaded with a solution of the Grignard reagent from *Part A*. 2,5-Dibromo-1,3-diisopropylbenzene (1.79 g, 5.59 mmol) was added, followed by the addition of Ni(PPh<sub>3</sub>)<sub>2</sub>Cl<sub>2</sub> (183 mg, 0.28 mmol, 0.05 equiv.) and the resulting suspension was stirred at 40 °C for 6 h. Then, the mixture was allowed to cool to room temperature, NH<sub>4</sub>Cl (sat. aq. soln. 10 mL) and H<sub>2</sub>O (10 mL) were added, and the mixture was extracted with EtOAc (20 mL, then 2 x 5 mL). The combined organic extracts were dried over MgSO<sub>4</sub>, filtered, and the solvent was removed under reduced pressure. The residue was purified by column chromatography (100 g of silica gel, hexanes) to give the title compound as a colourless solid (1.26 g, 63% yield).

<sup>1</sup>H NMR (400 MHz, CDCl<sub>3</sub>) δ 6.97 (s, 2H), 6.92 (s, 2H), 3.55 (hept, *J* = 6.7 Hz, 2H), 2.35 (s, 3H), 2.02 (s, 6H), 1.25 (d, *J* = 6.8 Hz, 12H).

<sup>13</sup>C NMR (101 MHz, CDCl<sub>3</sub>) δ 147.8, 140.0, 138.9, 136.9, 136.1, 128.3, 125.4, 124.6, 33.7, 23.3, 21.2, 20.9.

HRMS (EI<sup>+</sup>) (*m/z*): [M<sup>+</sup>] calculated for C<sub>21</sub>H<sub>27</sub>Br, 358.12907; found, 358.12974.

## 2,6-bis(3,5-diisopropyl-2',4',6'-trimethyl-[1,1'-biphenyl]-4-yl)-4-(2,6-diisopropylphenyl)pyridine (C6\_N)

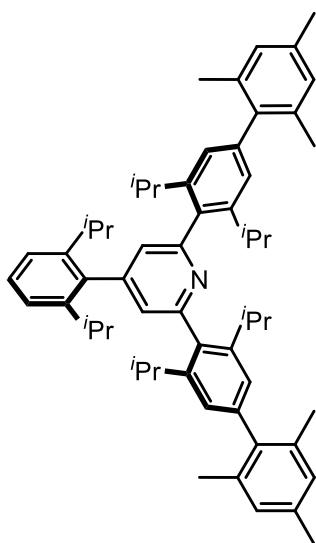

*Part A.* Magnesium (108 mg, 4.5 mmol, 3 equiv.) was placed in a Schlenk flask containing a stirring bar. The flask was closed with a septum, evacuated, flame-dried under vacuum for 1 min and left to cool down. Then, the flask was refilled with nitrogen and dry THF (0.3 mL) was added followed by slow addition of 1,2-dibromoethane (0.02 mL). To activate the magnesium, the mixture was repeatedly briefly heated to reflux with a heat gun. A solution of R<sup>b</sup>-Br (1.29 g, 3.6 mmol, 2.4 equiv.) in dry THF (3 mL) was added dropwise while maintaining the reflux of the reaction mixture. After that, the flask was sealed and the resulting mixture was stirred at 60 °C for an additional 4 h.

*Part B.* A separate 25 mL Schlenk flask was loaded with 2,6-dichloro-4-(2,6-diisopropylphenyl)pyridine (462 mg, 1.5 mmol, prepared as described above) and Pd(PPh<sub>3</sub>)<sub>2</sub>Cl<sub>2</sub> (53 mg, 0.075 mmol, 0.05 equiv.) and was placed under an inert atmosphere with three vacuum/N<sub>2</sub> cycles. The Grignard reagent solution from *Part A* was added, followed by THF (1 mL), and the resulting suspension was stirred at 80 °C for 24 h. Then, the mixture was allowed to cool to room temperature, and H<sub>2</sub>O (10 mL) and CH<sub>2</sub>Cl<sub>2</sub> (20 mL) were added. The layers were separated and the aqueous layer was extracted with CH<sub>2</sub>Cl<sub>2</sub> (2 x 10 mL). The combined organic extracts were dried over MgSO<sub>4</sub>, filtered, and the solvent was removed under reduced pressure. The residue was purified by column chromatography (50 g of silica gel, hexanes/CH<sub>2</sub>Cl<sub>2</sub> 7:3) to give the title compound as a colourless solid (1.12 g, 94% yield).

<sup>1</sup>H NMR (400 MHz, CDCl<sub>3</sub>) δ 7.37 (t, *J* = 7.7 Hz, 1H), 7.27 (s, 2H), 7.24 (d, *J* = 7.8 Hz, 2H), 7.01 (s, 4H), 6.98 (s, 4H), 2.91 – 2.78 (m, 6H), 2.35 (s, 6H), 2.06 (s, 12H), 1.22 (d, *J* = 6.9 Hz, 12H), 1.18 (d, *J* = 6.9 Hz, 12H), 1.13 (d, *J* = 6.9 Hz, 12H).

<sup>13</sup>C NMR (101 MHz, CDCl<sub>3</sub>) δ 160.0, 146.4, 146.1, 140.8, 139.9, 137.1, 136.8, 136.6, 136.4, 136.2, 128.6, 128.3, 128.2, 124.8, 123.7, 122.8, 30.9, 30.8, 24.7, 24.2, 23.6, 21.2, 21.1, 21.0.

HRMS (ESI+) (*m/z*): [M+H<sup>+</sup>] calculated for C<sub>59</sub>H<sub>74</sub>N, 796.58158; found, 796.58026.

**2,6-bis(3,5-diisopropyl-2',4',6'-trimethyl-[1,1'-biphenyl]-4-yl)-4-(2,6-diisopropylphenyl)-1-methylpyridin-1-ium tetrafluoroborate (C6<sup>+</sup>BF<sub>4</sub><sup>-</sup>)**

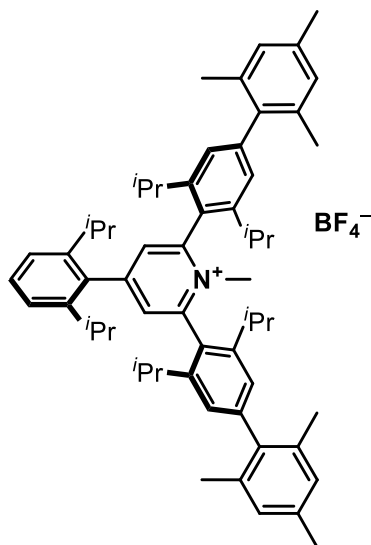

A 10 mL Schlenk flask was loaded with C6\_N (156 mg, 0.19 mmol) and placed under an inert atmosphere with three vacuum/N<sub>2</sub> cycles. Dry CH<sub>2</sub>Cl<sub>2</sub> (2 mL) was added and the mixture was cooled to 0 °C. Trimethyloxonium tetrafluoroborate (35 mg, 0.23 mmol, 1.2 equiv) was added in one portion and the resulting suspension was stirred at 0 °C for 1 h. Then, H<sub>2</sub>O (3 mL) was added, and the mixture was extracted with CH<sub>2</sub>Cl<sub>2</sub> (3 x 5 mL), the combined organic extracts were dried over MgSO<sub>4</sub>, filtered, and the solvent was removed under reduced pressure. The residue was purified by column chromatography (10 g of silica gel, CH<sub>2</sub>Cl<sub>2</sub>, 5 CV; then 10% *i*PrOH in CH<sub>2</sub>Cl<sub>2</sub>, 5 CV), the collected fractions were washed with NaBF<sub>4</sub> (10% aq. soln., 50 mL), filtered through a filter paper, and the solvent was removed under reduced pressure to afford the title compound as a yellowish solid (165 mg, 94% yield).

<sup>1</sup>H NMR (400 MHz, CDCl<sub>3</sub>) δ 7.97 (s, 2H), 7.49 (t, *J* = 7.9 Hz, 1H), 7.31 (d, *J* = 7.9 Hz, 2H), 7.23 (s, 4H), 6.99 (s, 2H), 6.97 (s, 2H), 3.91 (s, 3H), 2.53 (hept, *J* = 6.9 Hz, 2H), 2.34 (s, 6H), 2.28 (hept, *J* = 6.7 Hz, 4H), 2.05 (s, 6H), 2.02 (s, 6H), 1.35 (d, *J* = 6.8 Hz, 12H), 1.23 (d, *J* = 6.7 Hz, 24H).

<sup>13</sup>C NMR (101 MHz, CDCl<sub>3</sub>) δ 160.0, 157.5, 146.1, 145.1, 137.7, 137.6, 136.2, 135.3, 132.0, 131.1, 128.7, 128.4, 126.2, 126.1, 123.7, 44.1, 32.9, 31.9, 25.0, 24.1, 23.4, 21.2, 20.9.

<sup>19</sup>F NMR (376 MHz, CDCl<sub>3</sub>) δ -154.26, -154.31.

HRMS (ESI+) (*m/z*): [M<sup>+</sup>] calculated for C<sub>60</sub>H<sub>76</sub>N, 810.59723; found, 810.59171.

## Synthesis of R<sup>c</sup>-Br

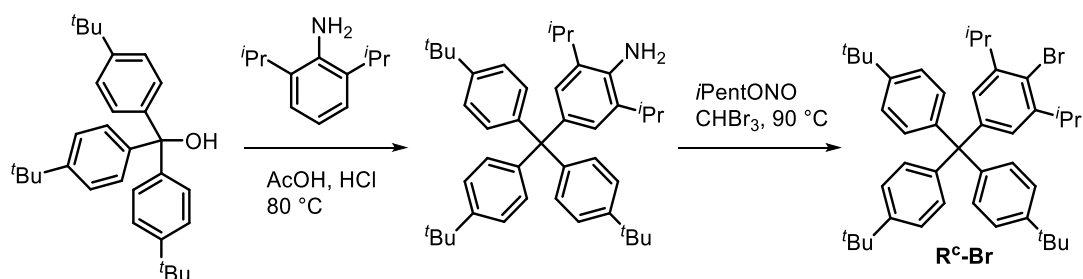

### 2,6-diisopropyl-4-(tris(4-(*tert*-butyl)phenyl)methyl)aniline

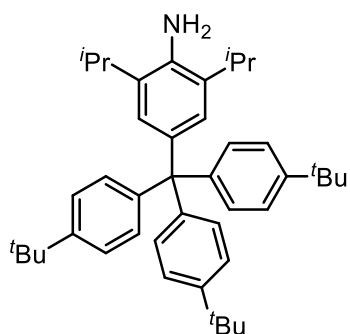

Tris(4-(*tert*-butyl)phenyl)methanol<sup>7</sup> (15.6 g, 36.4 mmol) was dissolved in acetic acid (220 mL) and the solution was degassed by purging with N<sub>2</sub>. Then, 2,6-diisopropylaniline (9.68 g, 10.3 mL, 54.6 mmol, 1.5 equiv.) was added, followed by the addition of concentrated HCl (3.3 mL). The reaction mixture was stirred at 80 °C under an N<sub>2</sub> atmosphere for 8 h, then allowed to cool to room temperature and stirred for further 18 h. KOH (40 mL, 2 M aq. soln.) was added and the formed precipitate was isolated by filtration, washed with H<sub>2</sub>O (3 x 100 mL), MeOH (50 mL, 2 x 25 mL), and dried under vacuum to afford the title compound as a colourless solid (18.3 g, 86% yield). The <sup>1</sup>H NMR analysis was in accordance with the previously reported data.<sup>8</sup>

### 4,4',4''-(4-bromo-3,5-diisopropylphenyl)methanetriyl)tris(*tert*-butylbenzene) (R<sup>c</sup>-Br)

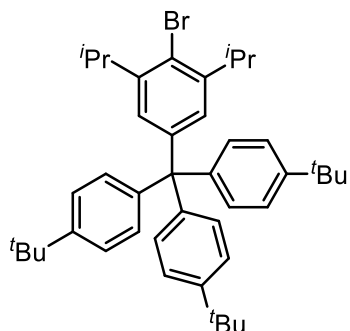

Isopentyl nitrite (1.17 g, 1.34 mL, 10 mmol, 5 equiv.) was added dropwise over 3 min to a stirred degassed solution of 2,6-diisopropyl-4-(tris(4-(*tert*-butyl)phenyl)methyl)aniline (1.18 g, 2 mmol) in CHBr<sub>3</sub> at 90 °C. The reaction mixture was stirred for 1 h and cooled to room temperature. Then, silica gel (2 g) was added and the mixture was concentrated under reduced pressure. The residue was loaded directly on a silica gel column (40 g) and purified by column chromatography (hexanes) to afford the title compound as a colourless solid (860 mg, 66% yield).

<sup>1</sup>H NMR (400 MHz, CDCl<sub>3</sub>) δ 7.26 – 7.22 (m, 6H), 7.11 – 7.05 (m, 6H), 6.86 (s, 2H), 3.41 (hept, *J* = 7.0 Hz, 2H), 1.31 (s, 27H), 1.04 (d, *J* = 6.8 Hz, 12H).

<sup>13</sup>C NMR (101 MHz, CDCl<sub>3</sub>) δ 148.7, 146.5, 146.0, 143.8, 130.9, 127.8, 124.1, 123.7, 63.8, 34.5, 33.5, 31.5, 23.0.

HRMS (EI<sup>+</sup>) (*m/z*): [M<sup>+</sup>] calculated for C<sub>43</sub>H<sub>55</sub>Br, 650.34817; found, 650.34710.

**2,6-bis(2,6-diisopropyl-4-(tris(4-(*tert*-butyl)phenyl)methyl)phenyl)-4-(2,6-diisopropylphenyl)pyridine**  
(C7\_N)

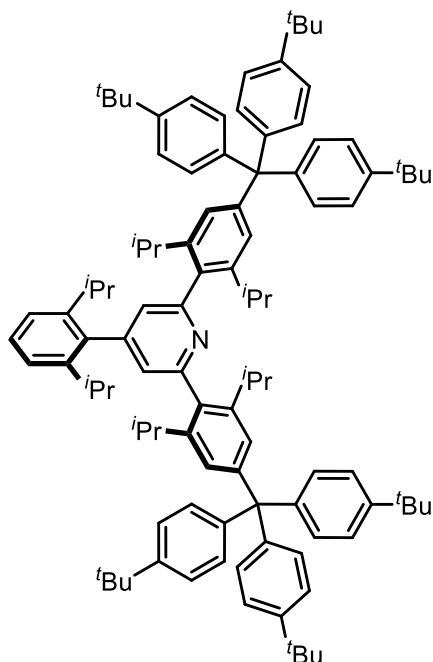

*Part A.* Magnesium (66 mg, 2.75 mmol, 3.6 equiv.) was placed in a Schlenk flask containing a stirring bar. The flask was closed with a septum, evacuated, flame-dried under vacuum for 1 min and left to cool down. Then, the flask was refilled with nitrogen and dry THF (0.3 mL) was added followed by slow addition of 1,2-dibromoethane (0.02 mL). To activate the magnesium, the mixture was repeatedly briefly heated to reflux with a heat gun. A solution of **R<sup>c</sup>-Br** (1.17 g, 1.8 mmol, 2.4 equiv.) in dry THF (5 mL) was added dropwise while maintaining the reflux. After that, the flask was sealed and the resulting mixture was stirred at 60 °C for an additional 19 h.

*Part B.* A separate 25 mL Schlenk flask was loaded with 2,6-dichloro-4-(2,6-diisopropylphenyl)pyridine (231 mg, 0.75 mmol, prepared as above) and Pd(PPh<sub>3</sub>)<sub>2</sub>Cl<sub>2</sub> (26 mg, 0.0375 mmol, 0.05 equiv.) and was placed under an inert atmosphere with three vacuum/N<sub>2</sub> cycles. The Grignard reagent solution from *Part A* was added, followed by THF (1 mL), and the resulting suspension was stirred at 80 °C for 24 h. Then, the mixture was allowed to cool to room temperature, H<sub>2</sub>O (10 mL) and CH<sub>2</sub>Cl<sub>2</sub> (20 mL) were added, the layers were separated, and the aqueous layer was extracted with CH<sub>2</sub>Cl<sub>2</sub> (2 x 10 mL). The combined organic extracts were dried over MgSO<sub>4</sub>, filtered, and the solvent was removed under reduced pressure. The residue was purified by column chromatography (40 g of silica gel, hexanes/CH<sub>2</sub>Cl<sub>2</sub> 9:1) to give the title compound as a colourless solid (0.99 g, 96% yield).

<sup>1</sup>H NMR (400 MHz, CDCl<sub>3</sub>) δ 7.34 (t, *J* = 7.7 Hz, 1H), 7.25 – 7.21 (m, 12H), 7.20 (d, *J* = 7.7 Hz, 2H), 7.17 – 7.12 (m, 14H), 6.92 (s, 4H), 2.75 (d, *J* = 6.9 Hz, 2H), 2.66 (hept, *J* = 6.8 Hz, 4H), 1.30 (s, 54H), 1.12 (d, *J* = 6.8 Hz, 12H), 0.96 (d, *J* = 6.8 Hz, 12H), 0.93 (d, *J* = 6.8 Hz, 12H).

<sup>13</sup>C NMR (101 MHz, CDCl<sub>3</sub>) δ 160.0, 148.7, 148.3, 147.2, 146.1, 144.7, 144.3, 136.9, 136.1, 131.0, 128.5, 125.9, 124.6, 124.0, 122.7, 64.2, 34.4, 31.5, 30.8, 30.7, 24.5, 24.2, 23.3.

HRMS (ESI+) (*m/z*): [M+H<sup>+</sup>] calculated for C<sub>103</sub>H<sub>130</sub>N, 1381.01978; found, 1381.01477.

**2,6-bis(2,6-diisopropyl-4-(tris(4-(*tert*-butyl)phenyl)methyl)phenyl)-4-(2,6-diisopropylphenyl)-1-methylpyridin-1-ium tetrafluoroborate (C7<sup>+</sup>BF<sub>4</sub><sup>-</sup>)**

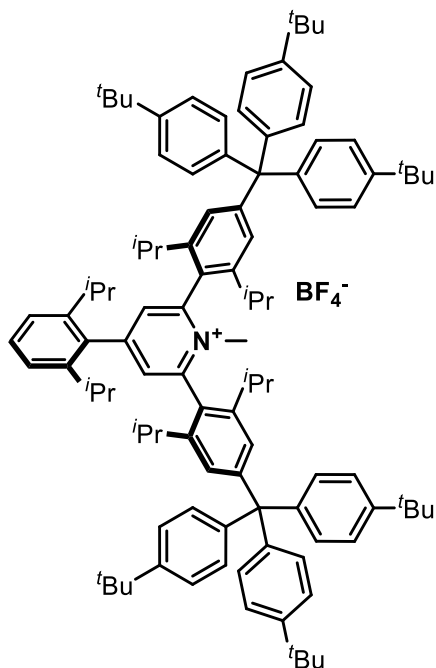

A 10 mL Schlenk flask was loaded with **C7\_N** (276 mg, 0.2 mmol) and placed under an inert atmosphere with three vacuum/N<sub>2</sub> cycles. Dry CH<sub>2</sub>Cl<sub>2</sub> (2 mL) was added and the mixture was cooled to 0 °C. Trime-thyloxonium tetrafluoroborate (36 mg, 0.24 mmol, 1.2 equiv) was added in one portion and the resulting suspension was stirred at 0 °C for 1 h. Then, H<sub>2</sub>O (3 mL) was added, the mixture was extracted with CH<sub>2</sub>Cl<sub>2</sub> (3 x 5 mL), and the combined organic extracts were dried over MgSO<sub>4</sub>, filtered, and the solvent was removed under reduced pressure. The residue was purified by column chromatography (10 g of silica gel, CH<sub>2</sub>Cl<sub>2</sub>, 5 CV; then 10% *i*PrOH in CH<sub>2</sub>Cl<sub>2</sub>, 5 CV), the collected fractions were washed with NaBF<sub>4</sub> (10% aq. soln., 50 mL), filtered through a filter paper, and the solvent was evaporated under reduced pressure to afford the title compound as a colourless solid (250 mg, 84% yield).

<sup>1</sup>H NMR (400 MHz, CDCl<sub>3</sub>) δ 7.85 (s, 2H), 7.46 (t, *J* = 7.8 Hz, 1H), 7.31 – 7.26 (m, 14H), 7.18 (s, 4H), 7.09 (d, *J* = 8.9 Hz, 12H), 3.83 (s, 3H), 2.45 (hept, *J* = 6.8 Hz, 2H), 2.15 (hept, *J* = 6.8 Hz, 4H), 1.30 (s, 54H), 1.17 (d, *J* = 6.8 Hz, 12H), 1.13 (d, *J* = 6.8 Hz, 12H), 1.01 (d, *J* = 6.7 Hz, 12H).

<sup>13</sup>C NMR (101 MHz, CDCl<sub>3</sub>) δ 159.8, 157.5, 152.9, 149.1, 145.0, 144.4, 143.0, 132.0, 131.02, 130.96, 130.8, 128.1, 125.1, 124.5, 123.7, 64.3, 43.9, 34.5, 32.7, 31.8, 31.5, 24.6, 24.1, 23.2.

<sup>19</sup>F NMR (376 MHz, CDCl<sub>3</sub>) δ -154.3, -154.4.

HRMS (ESI+) (*m/z*): [M<sup>+</sup>] calculated for C<sub>104</sub>H<sub>132</sub>N, 1395.03543; found, 1395.03369.

## 2.5 Synthesis of anions present in 1-6

### 3',5'-dichloro-2,6-diisopropyl-1,1'-biphenyl

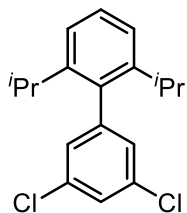

A 250 mL Schlenk flask was loaded with 3,5-dichloriodobenzene (4.8 g, 17.6 mmol), (2,6-diisopropylphenyl)boronic acid (4 g, 19.4 mmol, 1.1 equiv.), Pd(PPh<sub>3</sub>)<sub>2</sub>Cl<sub>2</sub> (1.24 g, 1.76 mmol, 0.1 equiv.), and Ba(OH)<sub>2</sub>·8H<sub>2</sub>O (11.1 g, 35.2 mmol, 2 equiv.) and was placed under an inert atmosphere with three vacuum/N<sub>2</sub> cycles. Then, degassed 1,4-dioxane (70 mL) and degassed H<sub>2</sub>O (30 mL) were added and the resulting suspension was stirred at 90 °C for 18 h. The reaction mixture was allowed to cool to room temperature, poured into a sat. aq. solution of NH<sub>4</sub>Cl (150 mL), and extracted with CH<sub>2</sub>Cl<sub>2</sub> (3 x 150 mL). The combined organic extracts were washed with brine (300 mL), dried over Na<sub>2</sub>SO<sub>4</sub>, filtered, and the solvent was removed under reduced pressure. The residue was purified by column chromatography (300 g of silica gel, hexanes) to give the title compound as a colourless solid (4.96 g, 92% yield).

<sup>1</sup>H NMR (500 MHz, CDCl<sub>3</sub>) δ 7.39 (t, *J* = 1.9 Hz, 1H, overlapped), 7.36 (t, *J* = 7.8 Hz, 1H, overlapped), 7.21 (d, *J* = 7.7 Hz, 2H), 7.09 (d, *J* = 1.9 Hz, 2H), 2.56 (hept, *J* = 6.9 Hz, 2H), 1.11 (d, *J* = 6.9 Hz, 12H).

<sup>13</sup>C NMR (126 MHz, CDCl<sub>3</sub>) δ 146.7, 144.0, 136.8, 134.8, 128.8, 128.1, 127.2, 122.9, 30.5, 24.3.

HRMS (EI+) (*m/z*): [M<sup>+</sup>] calculated for C<sub>18</sub>H<sub>20</sub>Cl<sub>2</sub>, 306.0942; found, 306.09327.

### 2'-bromo-5'-(2,6-diisopropylphenyl)-2,2'',4,4'',6,6''-hexaisopropyl-1,1':3,1''-terphenyl (A4\_Br)

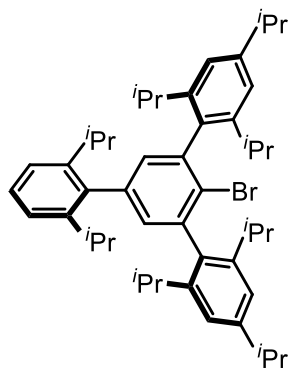

*Part A.* Magnesium (0.448 g, 18.4 mmol, 2.8 equiv.) was placed in a 100 mL Schlenk flask containing a stirring bar. The flask was closed with a septum, evacuated, dried with a heat-gun under vacuum for 1 min and left to cool to room temperature. Then, the flask was refilled with nitrogen and dry THF (6 mL) was added followed by slow addition of 1,2-dibromoethane (0.05 mL). To activate the magnesium, the mixture was repeatedly briefly heated to reflux with a heat gun. A solution of 1-bromo-2,4,6-triisopropylbenzene (4.06 g, 14.3 mmol, 2.2 equiv.) in dry THF (30 mL) was added dropwise while maintaining the reflux by heating the flask with a heat-gun occasionally. After that, the flask was sealed and the resulting mixture was stirred at 70 °C for an additional 24 h.

*Part B.* A separate 100 mL Schlenk flask was loaded with 3',5'-dichloro-2,6-diisopropyl-1,1'-biphenyl (2 g, 6.51 mmol) and was placed under an inert atmosphere with three vacuum/N<sub>2</sub> cycles. Dry THF (20 mL) was added, and the solution was cooled to -78 °C. *n*-BuLi (2.5 M in hexanes, 2.6 mL, 6.51 mmol, 1 equiv.) was added dropwise and the mixture was stirred at -78 °C for 1 h. Then, the Grignard reagent solution from *Part A* was quickly added through a cannula with vigorous stirring. The resulting solution was heated to 70 °C and stirred at that temperature for 3 h. Afterwards, it was cooled to -50 °C and bromine (1.25 g, 7.81 mmol, 1.2 equiv.)



was added. The mixture was stirred for 10 min at -50 °C, then poured into a sat. aq. solution of Na<sub>2</sub>SO<sub>3</sub> (150 mL) and extracted with CH<sub>2</sub>Cl<sub>2</sub> (3 x 100 mL). The combined organic layers were washed with brine (150 mL), dried over Na<sub>2</sub>SO<sub>4</sub>, filtered, and the solvent was removed under reduced pressure. The residue was purified by column chromatography (300 g of silica gel, hexanes to hexanes/CH<sub>2</sub>Cl<sub>2</sub> 9:1) to give the title compound as a colourless solid (3.55 g, 75% yield).

<sup>1</sup>H NMR (400 MHz, CDCl<sub>3</sub>) δ 7.31 (t, *J* = 7.7 Hz, 1H), 7.17 (d, *J* = 7.7 Hz, 2H), 7.06 (s, 4H), 7.04 (s, 2H), 2.95 (hept, *J* = 6.9 Hz, 2H), 2.86 (hept, *J* = 6.8 Hz, 2H), 2.72 (hept, *J* = 6.9 Hz, 4H), 1.31 (d, *J* = 7.0 Hz, 12H), 1.23 (d, *J* = 6.9 Hz, 12H), 1.11 (d, *J* = 6.9 Hz, 24H).

<sup>13</sup>C NMR (101 MHz, CDCl<sub>3</sub>) δ 148.5, 146.7, 146.0, 142.2, 139.3, 138.1, 136.4, 131.2, 128.1, 126.7, 122.5, 120.8, 34.3, 31.3, 30.7, 24.7, 24.3, 24.2, 23.7.

HRMS (EI+) (*m/z*): [M<sup>+</sup>] calculated for C<sub>48</sub>H<sub>65</sub>Br, 720.426965; found, 720.42568.

### 5'-(2,6-diisopropylphenyl)-2,2'',4,4'',6,6''-hexaisopropyl-[1,1':3',1''-terphenyl]-2'-sulfonyl chloride

(A4\_SO<sub>2</sub>Cl)

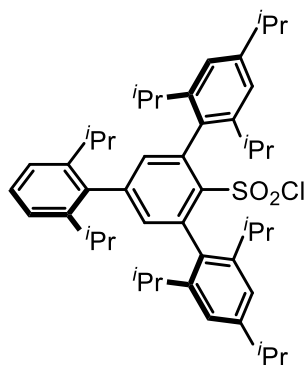

**A4\_Br** (1 g, 1.39 mmol) was placed in a flame-dried 100 mL Schlenk flask under a nitrogen atmosphere. Dry THF (15 mL) was added and the mixture was cooled to -78 °C. *n*-BuLi (2.5 M in hexanes, 1.11 mL, 2.78 mmol, 2 equiv.) was added slowly with vigorous stirring. The reaction mixture was stirred for 0.5 h at -78 °C and then placed in an ice-bath, warmed to 0 °C and stirred at this temperature for 15 min. The resulting suspension was cooled to -94 °C and SO<sub>2</sub>Cl<sub>2</sub> (0.563 g, 0.337 mL, 4.17 mmol, 3 equiv.) was added quickly in one portion. The reaction mixture was kept

stirring at -94 °C for 10 min, then it was taken from the bath and allowed to warm to 0 °C. H<sub>2</sub>O (40 mL) was added and the mixture was extracted with EtOAc (3 x 100 mL). The combined organic fractions were washed with NaHCO<sub>3</sub> (sat. aq. soln., 100 mL), brine (100 mL), dried over Na<sub>2</sub>SO<sub>4</sub>, filtered and concentrated under reduced pressure. The residue was purified by column chromatography (50 g of silica gel, hexanes/CH<sub>2</sub>Cl<sub>2</sub> 2:1) to give the title compound as a colourless solid (480 mg, 47% yield).

<sup>1</sup>H NMR (400 MHz, CDCl<sub>3</sub>) δ 7.31 (t, *J* = 7.9 Hz, 1H), 7.24 (s, 2H), 7.16 (d, *J* = 7.7 Hz, 2H), 7.03 (s, 4H), 2.93 (hept, *J* = 6.9 Hz, 2H), 2.74 – 2.55 (m, 6H), 1.29 (d, *J* = 6.8 Hz, 12H), 1.28 (d, *J* = 6.8 Hz, 12H), 1.11 (d, *J* = 6.8 Hz, 12H), 1.08 (d, *J* = 6.8 Hz, 12H).

<sup>13</sup>C NMR (101 MHz, CDCl<sub>3</sub>) δ 148.9, 146.7, 146.4, 146.0, 142.0, 141.1, 136.1, 134.4, 133.5, 128.8, 122.9, 120.8, 34.3, 31.8, 30.7, 25.9, 24.7, 24.2, 23.3.

HRMS (ESI+) (*m/z*): [*M*+Na<sup>+</sup>] calculated for C<sub>48</sub>H<sub>65</sub>ClO<sub>2</sub>SNa, 763.42860; found, 763.42627.

### Sodium 5'-(2,6-diisopropylphenyl)-2,2'',4,4'',6,6''-hexaisopropyl-[1,1':3',1''-terphenyl]-2'-sulfonate (Na<sup>+</sup>A4<sup>-</sup>)

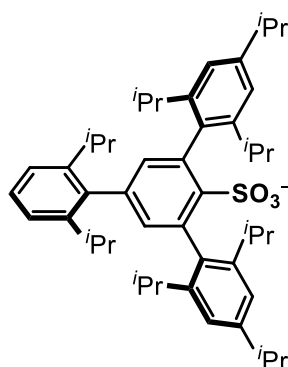

Magnesium (315 mg, 12.9 mmol, 20 equiv.) was placed in a 25 mL Schlenk flask containing a stirring bar. The flask was closed with a septum, evacuated, flame-dried under vacuum for 1 min and left to cool to room temperature. Then, the flask was refilled with nitrogen and dry THF (0.5 mL) was added followed by slow addition of 1,2-dibromoethane (0.02 mL). To activate the magnesium, the mixture was repeatedly briefly heated to reflux with a heat gun. Then, it was heated to 60 °C and a solution of **A4\_SO<sub>2</sub>Cl** (480 mg, 0.647 mmol) in dry THF

(5.5 mL) was added dropwise. The resulting mixture was stirred at 60 °C for an additional 2 h, before being poured into H<sub>2</sub>O (20 mL) and extracted with EtOAc (3 x 20 mL). The combined organic extracts were washed with brine (50 mL), dried over Na<sub>2</sub>SO<sub>4</sub>, filtered, and concentrated under reduced pressure. The residue was dissolved in dry CH<sub>2</sub>Cl<sub>2</sub> (7.5 mL) and the solution was cooled to 0 °C. Then, a solution of 3-chloroperoxybenzoic

acid (dried prior to use, approx. 80%, 154 mg, 0.712 mmol, 1.1 equiv.) in CH<sub>2</sub>Cl<sub>2</sub> (7.5 mL) was added dropwise. The reaction mixture was stirred at 0 °C for 1 h, then it was diluted with CH<sub>2</sub>Cl<sub>2</sub> (30 mL), washed with Na<sub>2</sub>CO<sub>3</sub> (sat. aq. soln., 2 x 40 mL), Na<sub>2</sub>S<sub>2</sub>O<sub>3</sub> (sat. aq. soln., 40 mL), brine (40 mL), dried over Na<sub>2</sub>SO<sub>4</sub>, filtered, and concentrated under reduced pressure. The residue was purified by column chromatography (50 g of silica gel, CH<sub>2</sub>Cl<sub>2</sub>, 1 CV; then 10% *i*PrOH in CH<sub>2</sub>Cl<sub>2</sub>, 3 CV), the collected fractions were washed with NaOH (5% aq. soln., 2 x 50 mL), dried over Na<sub>2</sub>SO<sub>4</sub>, filtered, and concentrated under reduced pressure to give the title compound as a colourless solid (327 mg, 68% yield).

<sup>1</sup>H NMR (500 MHz, CDCl<sub>3</sub>) δ 7.25 (t, *J* = 7.8 Hz, 2H), 7.11 (d, *J* = 7.8 Hz, 2H), 6.91 (s, 2H), 6.90 (s, 4H), 2.85 (hept, *J* = 6.9 Hz, 2H), 2.68 (hept, *J* = 6.8 Hz, 2H + hept, *J* = 6.8 Hz, 4H), 1.22 (d, *J* = 6.9 Hz, 12H), 1.15 (d, *J* = 6.8 Hz, 12H), 1.06 (d, *J* = 6.9 Hz, 12H), 1.01 (d, *J* = 6.8 Hz, 12H).

<sup>13</sup>C NMR (126 MHz, CDCl<sub>3</sub>) δ 147.4, 146.8, 146.6, 141.7, 139.5, 138.8, 137.5, 137.1, 132.7, 128.1, 122.6, 120.1, 34.2, 31.3, 30.4, 25.5, 24.7, 24.3, 23.4.

HRMS (ESI-) (*m/z*): [M-Na<sup>+</sup>] calculated for C<sub>48</sub>H<sub>65</sub>O<sub>3</sub>S, 721.46599; found, 721.45795.

### 3',5'-dichloro-2,4,6-triisopropyl-1,1'-biphenyl

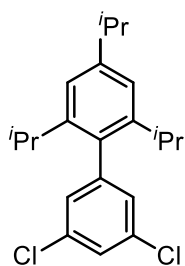

A 100 mL Schlenk flask was loaded with 3,5-dichloriodobenzene (2 g, 7.32 mmol), 2,4,6-triisopropylphenylboronic acid (2 g, 8.05 mmol, 1.1 equiv.), Pd(PPh<sub>3</sub>)<sub>2</sub>Cl<sub>2</sub> (0.514 g, 0.732 mmol, 0.1 equiv.), and Ba(OH)<sub>2</sub>·8H<sub>2</sub>O (4.62 g, 14.6 mmol, 2 equiv.) and was placed under an inert atmosphere with three vacuum/N<sub>2</sub> cycles. Then, degassed 1,4-dioxane (25 mL) and degassed H<sub>2</sub>O (10 mL) were added and the resulting suspension was stirred at 90 °C for 18 h.

The reaction mixture was allowed to cool to room temperature, poured into a sat. aq. solution of NH<sub>4</sub>Cl (100 mL), and extracted with CH<sub>2</sub>Cl<sub>2</sub> (3 x 100 mL). The combined organic extracts were washed with brine (200 mL), dried over Na<sub>2</sub>SO<sub>4</sub>, filtered, and the solvent was removed under reduced pressure. The residue was purified by column chromatography (250 g of silica gel, hexanes) to give the title compound as a colourless solid (1.92 g, 75% yield).

<sup>1</sup>H NMR (400 MHz, CDCl<sub>3</sub>) δ 7.36 (t, *J* = 1.9 Hz, 1H), 7.09 (d, *J* = 1.9 Hz, 2H), 7.05 (s, 2H), 2.93 (hept, *J* = 6.9 Hz, 1H), 2.54 (hept, *J* = 6.9 Hz, 2H), 1.29 (d, *J* = 6.9 Hz, 6H), 1.10 (d, *J* = 6.9 Hz, 12H).

<sup>13</sup>C NMR (101 MHz, CDCl<sub>3</sub>) δ 149.0, 146.4, 144.3, 134.7, 134.4, 128.4, 127.0, 120.9, 34.5, 30.5, 24.3, 24.2.

HRMS (EI+) (*m/z*): [M<sup>+</sup>] calculated for C<sub>21</sub>H<sub>26</sub>Cl<sub>2</sub>, 348.14061; found, 348.14094.

## 2'-bromo-2,2'',4,4'',6,6''-hexaisopropyl-5'-(2,4,6-triisopropylphenyl)-1,1':3',1''-terphenyl (A5\_Br)

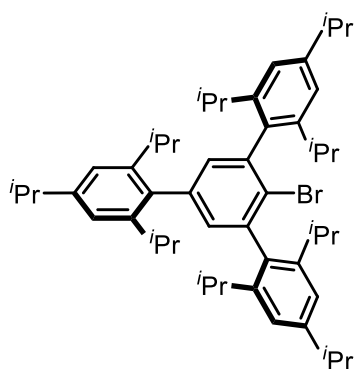

*Part A.* Magnesium (0.239 g, 9.83 mmol, 3.78 equiv.) was placed in a 100 mL Schlenk flask containing a stirring bar. The flask was closed with a septum, evacuated, dried with a heat-gun under vacuum for 1 min and left to cool to room temperature. Then, the flask was refilled with nitrogen and dry THF (3 mL) was added followed by slow addition of 1,2-dibromoethane (0.05 mL). To activate the magnesium, the mixture was repeatedly briefly heated to reflux with a heat gun. A solution of 1-bromo-2,4,6-triisopropylbenzene (1.62 g, 5.72

mmol, 2.2 equiv.) in dry THF (12 mL) was added dropwise while maintaining the reflux by occasionally heating the flask with a heat-gun. After that, the flask was sealed and the resulting mixture was stirred at 70 °C for an additional 24 h.

*Part B.* A separate 100 mL Schlenk flask was loaded with 3',5'-dichloro-2,4,6-triisopropyl-1,1'-biphenyl (0.91 g, 2.6 mmol) and was placed under an inert atmosphere with three vacuum/N<sub>2</sub> cycles. Dry THF (9 mL) was added, and the solution was cooled to -78 °C. *n*-BuLi (2.5M in hexanes, 1.04 mL, 2.6 mmol, 1 equiv.) was added dropwise and the mixture was stirred at -78 °C for 1 h. Then, the Grignard reagent solution from *Part A* was quickly added through a cannula with vigorous stirring. The resulting solution was heated to 70 °C and stirred at that temperature for 3 h. Afterwards, it was cooled to -50 °C and bromine (0.499 g, 0.16 mL, 3.12 mmol, 1.2 equiv.) was added. The mixture was stirred for 10 min at -50 °C, then poured into a sat. aq. solution of Na<sub>2</sub>SO<sub>3</sub> (100 mL) and extracted with CH<sub>2</sub>Cl<sub>2</sub> (3 x 100 mL). The combined organic layers were washed with brine (150 mL), dried over Na<sub>2</sub>SO<sub>4</sub>, filtered, and the solvent was removed under reduced pressure. The residue was purified by column chromatography (200 g of silica gel, hexanes, 1 CV; then hexanes/CH<sub>2</sub>Cl<sub>2</sub> 8:1, 1 CV; then hexanes/CH<sub>2</sub>Cl<sub>2</sub> 5:1, 2 CV) to give the title compound with slight impurities (<10%) as a white solid (1.58 g, 79% yield), which was used as is in the next step.

<sup>1</sup>H NMR (500 MHz, CDCl<sub>3</sub>) δ 7.08 (s, 4H), 7.07 (s, 2H), 7.04 (s, 2H), 3.03 – 2.92 (hept, *J* = 6.8 Hz, 2H + hept, *J* = 6.8 Hz, 1H), 2.92 – 2.84 (hept, *J* = 6.9 Hz, 2H), 2.75 (hept, *J* = 6.9 Hz, 4H), 1.33 (d, *J* = 6.9 Hz, 12H), 1.30 (d, *J* = 6.9 Hz, 6H), 1.26 (d, *J* = 6.8 Hz, 12H), 1.16 – 1.11 (m, 24H, two overlapped doublets).

<sup>13</sup>C NMR (126 MHz, CDCl<sub>3</sub>) δ 148.4, 148.2, 146.4, 146.0, 142.1, 139.6, 136.5, 135.7, 131.5, 126.5, 120.7, 120.5, 34.5, 34.3, 31.2, 30.7, 24.7, 24.3, 24.23, 24.21, 23.7.

HRMS (APCI+) (*m/z*): [M+H<sup>+</sup>] calculated for C<sub>51</sub>H<sub>72</sub>Br, 763.48119; found, 763.48075.

## 2,2'',4,4'',6,6''-hexaisopropyl-5'-(2,4,6-triisopropylphenyl)-[1,1':3',1''-terphenyl]-2'-sulfonyl chloride

(A5\_SO<sub>2</sub>Cl)

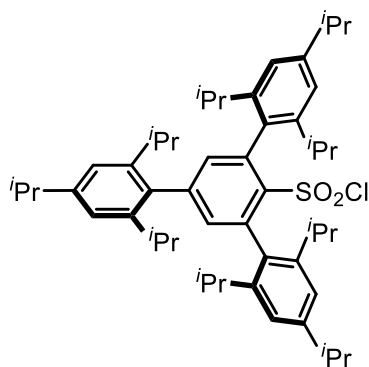

**A5\_Br** (1.92 g, 2.51 mmol) was placed in a flame-dried 100 mL Schlenk flask under a nitrogen atmosphere. Dry THF (20 mL) was added, and the mixture was cooled to -78 °C. *n*-BuLi (2.5 M in hexanes, 2.01 mL, 5.02 mmol, 2 equiv.) was added slowly with vigorous stirring. The reaction mixture was stirred for 0.5 h at -78 °C and then placed in an ice-bath, warmed to 0 °C and stirred at this temperature for 15 min. The resulting suspension was cooled to -94 °C in an acetone/liquid N<sub>2</sub> bath and SO<sub>2</sub>Cl<sub>2</sub> (1.02 g, 0.61 mL, 7.53 mmol, 3 equiv.)

was added quickly in one portion. The reaction mixture was kept stirring at -94 °C for 10 min, then it was taken from the bath and allowed to warm to 0 °C. H<sub>2</sub>O (100 mL) was added and the mixture was extracted with EtOAc (3 x 100 mL). The combined organic fractions were washed with NaHCO<sub>3</sub> (sat. aq. soln., 100 mL), brine (100 mL), dried over Na<sub>2</sub>SO<sub>4</sub>, filtered, and concentrated under reduced pressure. The residue was purified by column chromatography (200 g of silica gel, hexanes/CH<sub>2</sub>Cl<sub>2</sub> 2:1), the fractions containing impurity were concentrated and purified again by column chromatography (200 g of silica gel, hexanes/CH<sub>2</sub>Cl<sub>2</sub> 3:1), to provide with the title compound (1.1 g, 56%) as a yellowish solid.

<sup>1</sup>H NMR (500 MHz, CDCl<sub>3</sub>) δ 7.23 (s, 2H), 7.02 (s, 4H), 7.00 (s, 2H), 2.97 – 2.83 (hept, *J* = 6.9 Hz, 2H + hept, *J* = 6.9 Hz, 1H), 2.71 – 2.56 (hept, *J* = 6.8 Hz, 2H + hept, *J* = 6.8 Hz, 4H), 1.31 – 1.26 (m, 24H, two overlapped doublets), 1.24 (d, *J* = 6.9 Hz, 6H), 1.10 (d, *J* = 6.8 Hz, 12H), 1.08 (d, *J* = 6.8 Hz, 12H).

<sup>13</sup>C NMR (126 MHz, CDCl<sub>3</sub>) δ 149.1, 148.8, 147.1, 146.2, 146.0, 141.9, 140.9, 134.7, 133.7, 133.6, 120.8, 120.7, 34.4, 34.3, 31.8, 30.7, 25.9, 24.7, 24.2, 24.1, 23.3.

HRMS (ESI+) (*m/z*): [M+NH<sub>4</sub><sup>+</sup>] calculated for C<sub>51</sub>H<sub>75</sub>O<sub>2</sub>NCIS, 800.52016; found, 800.52022.

## Sodium 2,2'',4,4'',6,6''-hexaisopropyl-5'-(2,4,6-triisopropylphenyl)-[1,1':3',1''-terphenyl]-2'-sulfonate

(Na<sup>+</sup>A5<sup>-</sup>)

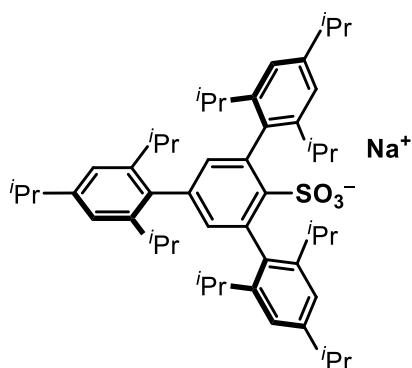

Magnesium (143 mg, 5.88 mmol, 20 equiv.) was placed in a 10 mL Schlenk flask containing a stirring bar. The flask was closed with a septum, evacuated, flame-dried under vacuum for 1 min and left to cool down to room temperature. Then, the flask was refilled with nitrogen and dry THF (0.5 mL) was added followed by slow addition of 1,2-dibromoethane (0.02 mL). To activate the magnesium, the mixture was repeatedly briefly

heated to reflux with a heat gun. Then, it was heated to 60 °C and a solution of **A5\_SO<sub>2</sub>Cl** (230 mg, 0.294 mmol) in dry THF (2 mL) was added dropwise. The resulting mixture was stirred at 60 °C for an additional 2 h, before being poured into H<sub>2</sub>O (10 mL) and extracted with EtOAc (3 x 10 mL). The combined organic extracts were washed with brine (20 mL), dried over Na<sub>2</sub>SO<sub>4</sub>, filtered and concentrated under reduced pressure. The residue was dissolved in dry CH<sub>2</sub>Cl<sub>2</sub> (3 mL) and the solution was cooled to 0 °C. Then, a solution of 3-chloroperoxybenzoic acid (dried prior to use, approx. 80%, 69.8 mg, 0.323 mmol, 1.1 equiv.) in CH<sub>2</sub>Cl<sub>2</sub> (1 mL) was added dropwise. The reaction mixture was stirred at 0 °C for 1 h, then it was diluted with CH<sub>2</sub>Cl<sub>2</sub> (30 mL), washed with NaOH (5% aq. soln., 20 mL), Na<sub>2</sub>S<sub>2</sub>O<sub>3</sub> (sat. aq. soln., 20 mL), brine (20 mL), dried over Na<sub>2</sub>SO<sub>4</sub>, filtered, and concentrated under reduced pressure. The residue was purified by column chromatography (25 g of silica gel, CH<sub>2</sub>Cl<sub>2</sub>, 1 CV, then 10% *i*PrOH in CH<sub>2</sub>Cl<sub>2</sub>, 2 CV), the collected fractions were washed with NaOH (5% aq. soln., 2 x 50 mL), dried over Na<sub>2</sub>SO<sub>4</sub>, filtered, and concentrated under reduced pressure to give the title compound as an off-white solid (140 mg, 61% yield).

<sup>1</sup>H NMR (500 MHz, CDCl<sub>3</sub>) δ 6.95 (s, 2H), 6.92 (s, 6H), 2.86 (hept, *J* = 6.9 Hz, 2H + hept, *J* = 6.9 Hz, 1H), 2.75 – 2.65 (hept, *J* = 6.8 Hz, 2H + hept, *J* = 6.8 Hz, 4H), 1.26 – 1.21 (two overlapped doublets, 18H), 1.17 (d, *J* = 6.8 Hz, 12H), 1.05 (d, *J* = 6.8 Hz, 12H), 0.99 (d, *J* = 6.9 Hz, 12H).

<sup>13</sup>C NMR (126 MHz, CDCl<sub>3</sub>) δ 148.2, 147.4, 147.1, 146.5, 141.6, 139.6, 139.2, 137.6, 135.2, 132.6, 120.5, 119.8, 34.4, 34.2, 31.3, 30.4, 25.5, 24.7, 24.3, 24.2, 23.3.

HRMS (ESI-) (*m/z*): [M-Na<sup>+</sup>] calculated for C<sub>51</sub>H<sub>71</sub>O<sub>3</sub>S, 763.51294; found, 763.51264.

**2''-bromo-5''-(2,6-diisopropylphenyl)-2''',3',5',6'''-tetraisopropyl-2,2''''',4,4''''',6,6'''''-hexamethyl-1,1':4',1'':3'',1''':4''',1''''-quinquephenyl (A6\_Br)**

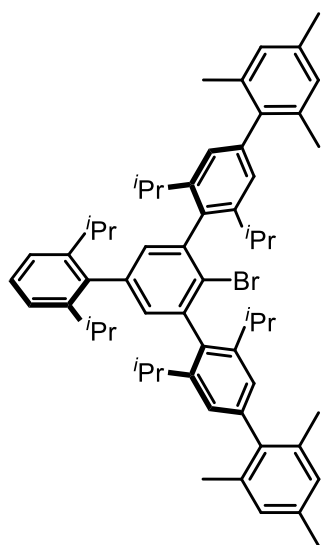

*Part A.* Magnesium (108 mg, 4.5 mmol, 3.1 equiv.) was placed in a 10 mL Schlenk flask containing a stirring bar. The flask was closed with a septum, evacuated, dried with a heat-gun under vacuum for 1 min and left to cool to room temperature. Then, the flask was refilled with nitrogen and dry THF (0.3 mL) was added followed by slow addition of 1,2-dibromoethane (0.02 mL). To activate the magnesium, the mixture was repeatedly briefly heated to reflux with a heat gun. A solution of **R<sup>b</sup>-Br** (1.29 g, 3.6 mmol, 2.5 equiv.) in dry THF (3 mL) was added dropwise while maintaining the reflux by heating the flask with a heat-gun. After that, the flask was sealed and the resulting mixture was stirred at 60 °C for an additional 5 h.

*Part B.* A 25 mL Schlenk flask was loaded with 3',5'-dichloro-2,6-diisopropyl-1,1'-biphenyl (442 mg, 1.44 mmol, prepared as described above) and was placed under an inert atmosphere with three vacuum/N<sub>2</sub> cycles. Dry

THF (4 mL) was added, and the solution was cooled to -78 °C. *n*-BuLi (2.5M in hexanes, 0.58 mL, 1.44 mmol, 1 equiv.) was added dropwise and the mixture was stirred at -78 °C for 1.5 h. Then, the Grignard reagent solution from *Part A* was added quickly with a syringe with vigorous stirring. The resulting solution was heated to 66 °C and stirred at that temperature for 3 h. After that, it was cooled to -30 °C and bromine (0.118 mL, 368 mg, 2.3 mmol, 1.6 equiv.) was added. The mixture was stirred for 5 min at -30 °C before being warmed to 0 °C. Na<sub>2</sub>SO<sub>3</sub> (sat. aq. soln., 8 mL) was added with vigorous stirring, the mixture was separated between H<sub>2</sub>O (10 mL) and EtOAc (50 mL), the aqueous phase was extracted with EtOAc (2 x 30 mL), the combined organic layers were dried over MgSO<sub>4</sub>, filtered, and the solvent was removed under reduced pressure. The residue was subjected to column chromatography (100 g of silica gel, dry-loaded with 2 g of silica gel, hexanes/CH<sub>2</sub>Cl<sub>2</sub> 98:2, 2.5 CV; then 96:4, 2.5 CV; then 94:6, 2.5 CV). The obtained material (773 mg) was contaminated with a side product in which there is H instead of Br (product/side product 0.78:0.22).

<sup>1</sup>H NMR (400 MHz, CDCl<sub>3</sub>) δ 7.33 (t, *J* = 7.7 Hz, 1H<sup>product</sup> + 1H<sup>side product</sup>), 7.21 – 7.20 (m, 3H<sup>side product</sup>, overlapped), 7.20 (d, *J* = 7.8 Hz, 2H<sup>product</sup>), 7.17 (s, 2H<sup>product</sup>), 7.12 (d, *J* = 1.6 Hz, 2H<sup>side product</sup>), 6.98 – 6.97 (m, 8H<sup>product</sup> + 4H<sup>side product</sup>), 6.97 (s, 4H<sup>side product</sup>), 2.98 – 2.86 (m, 2H<sup>product</sup> + 6H<sup>side product</sup>), 2.77 (hept, *J* = 6.9 Hz, 4H<sup>product</sup>), 2.35 (s, 6H<sup>product</sup> + 6H<sup>side product</sup>), 2.08 (s, 6H<sup>product</sup>), 2.06 (s, 6H<sup>product</sup> + 12H<sup>side product</sup>), 1.22 (d, *J* = 6.9 Hz, 12H<sup>product</sup>), 1.16 (d, *J* = 6.9 Hz, 12H<sup>product</sup> + 12H<sup>side product</sup>), 1.14 – 1.10 (m, 12H<sup>product</sup> + 24H<sup>side product</sup>).

<sup>13</sup>C NMR (101 MHz, CDCl<sub>3</sub>) δ 146.83, 146.76, 146.7, 146.3, 142.2, 140.59, 140.55, 140.3, 140.1, 139.5, 139.4, 138.1, 137.4, 136.9, 136.6, 136.43, 136.37, 136.3, 136.1, 131.1, 129.5, 129.2, 128.23, 128.20, 128.16, 127.9, 126.6, 123.8, 123.5, 122.6, 122.5, 31.3, 30.8, 24.7, 24.3, 24.2, 23.6, 21.2, 21.99, 21.95, 21.81, 20.8. Includes signals from the product and the side product.

HRMS (APCI+) (*m/z*): [M+H]<sup>+</sup><sup>product</sup> calculated for C<sub>60</sub>H<sub>74</sub>Br, 873.49684; found, 873.49649.

HRMS (APCI+) (*m/z*): [M+H]<sup>+</sup><sup>side product</sup> calculated for C<sub>60</sub>H<sub>75</sub>, 795.58633; found, 795.58592.

**5''-(2,6-diisopropylphenyl)-2'''',3',5',6'''-tetraisopropyl-2,2''''',4,4''''',6,6'''''-hexamethyl-  
[1,1':4',1'':3'',1''':4''',1''''-quinquephenyl]-2''-sulfonyl chloride (A6\_SO<sub>2</sub>Cl)**

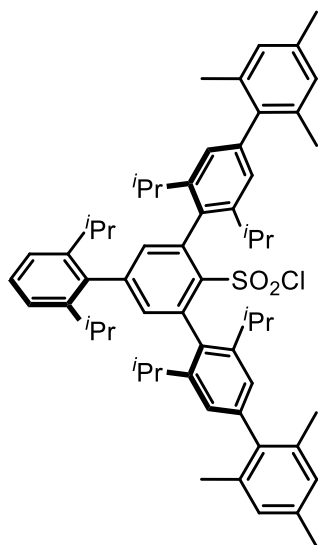

**A6\_Br** (730 mg, contaminated with a side product as described above) was placed in a flame-dried Schlenk flask under a nitrogen atmosphere. Dry THF (8 mL) was added and the mixture was cooled to -78 °C. *n*-BuLi (2.5 M in hexanes, 0.84 ml, 2.09 mmol, 2.5 equiv.) was added slowly with vigorous stirring. The reaction mixture was stirred for 20 min at -78 °C and then placed in an ice-bath, warmed to 0 °C and stirred at this temperature for 15 min. The resulting suspension was cooled to -94 °C and SO<sub>2</sub>Cl<sub>2</sub> (339 mg, 0.204 mL, 2.51 mmol, 3 equiv.) was added quickly in one portion. The reaction mixture was kept stirring at -94 °C for 20 min, then it was taken from the bath and warmed to 0 °C. H<sub>2</sub>O (15 mL) was added and the mixture was extracted with EtOAc (3 x 20 mL). The combined organic

fractions were washed with NaHCO<sub>3</sub> (sat. aq. soln., 10 mL), dried over MgSO<sub>4</sub>, filtered, and concentrated under reduced pressure. The residue was purified by column chromatography (30 g of silica gel, dry-loaded with 2 g of silica gel, hexanes/CH<sub>2</sub>Cl<sub>2</sub> 90:10, 2 CV; then 90:10, 2 CV; then 85:15, 2 CV; then 80:20, 2 CV) to give the title compound as a colourless solid (193 mg, 15% total yield over two steps, based on 3',5'-dichloro-2,6-diisopropyl-1,1'-biphenyl).

<sup>1</sup>H NMR (400 MHz, CDCl<sub>3</sub>) δ 7.38 – 7.33 (m, 3H), 7.21 (d, *J* = 7.7 Hz, 2H), 6.99 (s, 6H), 6.97 (s, 2H), 2.80 – 2.61 (m, 6H), 2.35 (s, 6H), 2.07 (s, 12H), 1.28 (d, *J* = 6.7 Hz, 12H), 1.16 (d, *J* = 6.8 Hz, 12H), 1.10 (d, *J* = 6.8 Hz, 12H).

<sup>13</sup>C NMR (101 MHz, CDCl<sub>3</sub>) δ 146.7, 146.5, 141.8, 141.6, 141.1, 139.8, 136.8, 136.7, 136.3, 135.9, 134.4, 134.0, 129.0, 128.3, 128.1, 123.8, 123.0, 31.9, 30.8, 25.9, 24.7, 23.2, 21.2, 20.94, 20.88.

HRMS (ESI+) (*m/z*): [M+Na<sup>+</sup>] calculated for C<sub>60</sub>H<sub>73</sub>SO<sub>2</sub>ClNa, 915.49120; found, 915.48969.



**Sodium 5''-(2,6-diisopropylphenyl)-2''',3',5',6'''-tetraisopropyl-2,2''''',4,4''''',6,6'''''-hexamethyl-[1,1':4',1'':3'',1''':4''',1''''-quinquephenyl]-2''-sulfonate (Na<sup>+</sup>A6<sup>-</sup>)**

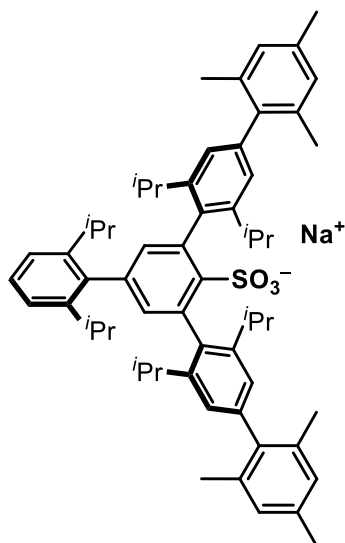

Magnesium (29.2 mg, 1.2 mmol, 6.3 equiv.) was placed in a 10 mL Schlenk flask containing a stirring bar. The flask was closed with a septum, evacuated, flame-dried under vacuum for 1 min and left to cool to room temperature. Then, the flask was refilled with nitrogen and dry THF (0.3 mL) was added followed by slow addition of 1,2-dibromoethane (0.02 mL). To activate the magnesium, the mixture was repeatedly briefly heated to reflux with a heat gun. Then, it was heated to 60 °C and a solution of **A6\_SO<sub>2</sub>Cl** (170 mg, 0.19 mmol) in dry THF (3 mL) was added dropwise. The resulting mixture was stirred at 60 °C for an additional 1 h, then H<sub>2</sub>O (2 mL) was added, and the mixture was separated between H<sub>2</sub>O (10 mL) and EtOAc (20 mL). The aqueous phase was extracted with

EtOAc (2 x 10 mL), and the combined organic extracts were washed with brine (5 mL), dried over MgSO<sub>4</sub>, filtered, and concentrated under reduced pressure. The residue was dissolved in dry CH<sub>2</sub>Cl<sub>2</sub> (5 mL) and the solution was cooled to 0 °C. Then, a solution of 3-chloroperoxybenzoic acid (77%, 46.8 mg, 0.21 mmol, 1.1 equiv.) in CH<sub>2</sub>Cl<sub>2</sub> (5 mL) was added dropwise. The reaction mixture was stirred at 0 °C for 1 h, then it was diluted with hexanes (50 mL), washed with NaOH (1M aq. soln., 3 x 10 mL), dried over MgSO<sub>4</sub>, filtered, and concentrated under reduced pressure. The residue was purified by column chromatography (10 g of silica gel, 5% *i*PrOH in CH<sub>2</sub>Cl<sub>2</sub>, 5 CV; then 10% *i*PrOH in CH<sub>2</sub>Cl<sub>2</sub>, 1 CV), the collected fractions were washed with NaOH (5% aq. soln., 2 x 50 mL), filtered through a filter paper, and concentrated under reduced pressure to give the title compound as a colourless solid (154 mg, 90% yield).

<sup>1</sup>H NMR (400 MHz, CDCl<sub>3</sub>) δ 7.31 (t, *J* = 7.7 Hz, 1H), 7.17 (d, *J* = 7.8 Hz, 2H), 7.02 (s, 2H), 6.97 (s, 2H), 6.85 (s, 4H), 6.73 (s, 2H), 2.87 – 2.65 (m, 6H), 2.33 (s, 6H), 1.99 (s, 6H), 1.93 (s, 6H), 1.12 (d, *J* = 6.8 Hz, 12H), 1.08 (d, *J* = 6.7 Hz, 12H), 0.99 (d, *J* = 6.8 Hz, 12H).

<sup>13</sup>C NMR (101 MHz, CDCl<sub>3</sub>) δ 146.9, 146.8, 141.4, 139.9, 139.7, 139.6, 139.5, 137.8, 137.7, 136.4, 136.3, 135.8, 132.5, 128.3, 128.3, 123.3, 122.8, 31.3, 30.5, 25.5, 24.7, 23.3, 21.1, 21.0, 20.9.

HRMS (ESI-) (*m/z*): [(M-Na<sup>+</sup>)] calculated for C<sub>60</sub>H<sub>73</sub>SO<sub>3</sub>, 873.52749; found, 873.52618.

**2'-bromo-5'-(2,6-diisopropylphenyl)-2,2'',6,6''-tetraisopropyl-4,4''-bis(tris(4-(*tert*-butyl)phenyl)methyl)-1,1':3',1''-terphenyl (A7\_Br)**

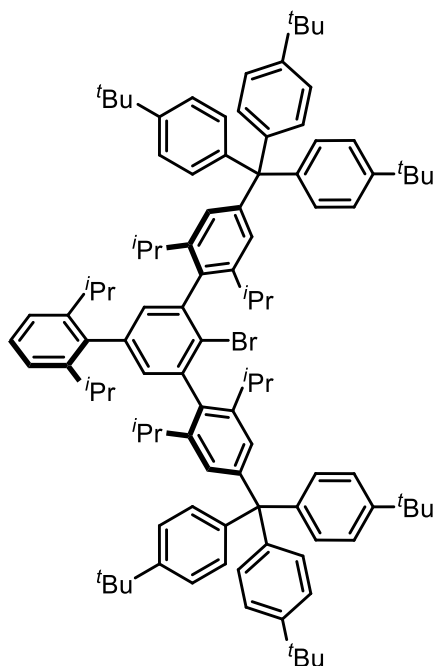

*Part A.* Magnesium (64 mg, 2.67 mmol, 3.7 equiv.) was placed in a 10 mL Schlenk flask containing a stirring bar. The flask was closed with a septum, evacuated, dried with a heat gun under vacuum for 1 min and left to cool down to room temperature. Then, the flask was refilled with nitrogen and dry THF (0.3 mL) was added followed by slow addition of 1,2-dibromoethane (0.02 mL). To activate the magnesium, the mixture was repeatedly briefly heated to reflux with a heat gun. A solution of **R<sup>c</sup>-Br** (1.17 g, 1.8 mmol, 2.5 equiv.) in dry THF (5.5 mL) was added dropwise while maintaining the reflux by occasionally heating the flask with a heat gun. After that, the flask was sealed and the resulting mixture was stirred at 60 °C for an additional 23 h.

*Part B.* A 25 mL Schlenk flask was loaded with 3',5'-dichloro-2,6-diisopropyl-1,1'-biphenyl (224 mg, 0.72 mmol, prepared as described above) and was placed under an inert atmosphere with three vacuum/N<sub>2</sub> cycles. Dry THF (2 mL) was added and the solution was cooled to -78 °C. *n*-BuLi (2.5M in hexanes, 0.288 mL, 0.72 mmol, 1 equiv.) was added dropwise and the mixture was stirred at -78 °C for 1.5 h. Then, the Grignard reagent solution from *Part A* was added quickly with a syringe with vigorous stirring. The resulting solution was heated to 66 °C and stirred at that temperature for 3 h. After that, it was cooled to -30 °C and bromine (0.05 mL, 184 mg, 1.15 mmol, 1.6 equiv.) was added. The mixture was stirred for 5 min before being warmed to 0 °C. Na<sub>2</sub>SO<sub>3</sub> (sat. aq. soln., 4 mL) was added with vigorous stirring, the mixture was separated between H<sub>2</sub>O (10 mL) and EtOAc (30 mL) and the aqueous phase was extracted with EtOAc (2 x 30 mL). The combined organic layers were dried over MgSO<sub>4</sub>, filtered, and the solvent was removed under reduced pressure. The residue was subjected to column chromatography (100 g of silica gel, hexanes/CH<sub>2</sub>Cl<sub>2</sub> 98:2, 5 CV; then 97:3, 2.5 CV; then 94:6, 2.5 CV; then 94:6, 2.5 CV; then 92:8, 2.5 CV), to afford the title compound as a colourless solid (761 mg, 73%).

<sup>1</sup>H NMR (400 MHz, CDCl<sub>3</sub>) δ 7.30 (t, *J* = 7.7 Hz, 1H), 7.27 – 7.23 (m, 14H), 7.17 (d, *J* = 7.7 Hz, 2H), 7.13 (m, 12H), 7.06 (s, 2H), 6.89 (s, 4H), 2.83 (hept, *J* = 6.6 Hz, 2H), 2.62 (hept, *J* = 6.9 Hz, 4H), 1.31 (s, 54H), 1.10 (d, *J* = 6.9 Hz, 12H), 1.01 (d, *J* = 6.8 Hz, 12H), 0.88 (d, *J* = 6.8 Hz, 12H).

<sup>13</sup>C NMR (101 MHz, CDCl<sub>3</sub>) δ 148.5, 146.8, 146.7, 144.5, 144.3, 142.2, 139.2, 138.2, 136.0, 131.1, 131.0, 128.1, 126.5, 126.3, 124.0, 122.5, 64.2, 34.5, 31.5, 31.1, 30.7, 24.4, 24.2, 23.4.

HRMS (APCI+) (*m/z*): [M+NH<sub>4</sub><sup>+</sup>] calculated for C<sub>104</sub>H<sub>133</sub>NBr, 1474.96159; found, 1474.96126.

**5'-(2,6-diisopropylphenyl)-2,2'',6,6''-tetraisopropyl-4,4''-bis(tris(4-(*tert*-butyl)phenyl)methyl)-[1,1':3',1''-terphenyl]-2'-sulfonyl chloride (A7\_SO<sub>2</sub>Cl)**

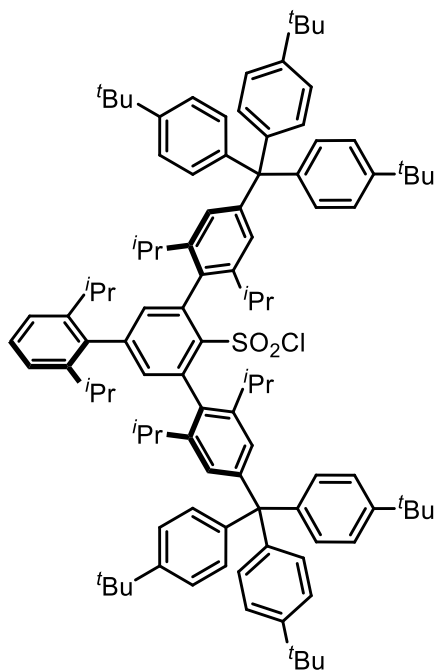

**A7\_Br** (700 mg, 0.48 mmol) was placed in a flame-dried Schlenk flask under a nitrogen atmosphere. Dry THF (10 mL) was added and the mixture was cooled to -78 °C. *n*-BuLi (2.5 M in hexanes, 0.48 ml, 1.2 mmol, 2.5 equiv.) was added slowly with vigorous stirring. The reaction mixture was stirred for 20 min at -78 °C and then placed in an ice-bath, warmed to 0 °C, and stirred at this temperature for 15 min. The resulting suspension was cooled to -94 °C and SO<sub>2</sub>Cl<sub>2</sub> (194 mg, 0.117 mL, 1.44 mmol, 3 equiv.) was quickly added in one portion. The reaction mixture was kept stirring at -94 °C for 20 min, then it was taken from the bath and warmed to 0 °C. H<sub>2</sub>O (15 mL) was added and the mixture was extracted with EtOAc (3 x 20 mL). The combined organic fractions were washed with NaHCO<sub>3</sub> (sat. aq. soln., 10 mL), dried over MgSO<sub>4</sub>, filtered, and concentrated under reduced pressure. The residue was purified by

column chromatography (30 g of silica gel, dry-loaded with 2 g of silica gel, hexanes/CH<sub>2</sub>Cl<sub>2</sub> 95:5, 2 CV; then 90:10, 2 CV; then 85:15, 1.5 CV; then 80:20, 1.5 CV) to give the title compound as a colourless solid (338 mg, 48%).

<sup>1</sup>H NMR (400 MHz, CDCl<sub>3</sub>) δ 7.33 (t, *J* = 7.8 Hz, 1H), 7.28 – 7.22 (m, 14H), 7.18 (d, *J* = 7.8 Hz, 2H), 7.15 – 7.10 (m, 12H), 6.88 (s, 4H), 2.66 (hept, *J* = 6.9 Hz, 2H), 2.54 (hept, *J* = 7.0 Hz, 4H), 1.31 (s, 54H), 1.10 (d, *J* = 6.8 Hz, 12H), 1.06 (d, *J* = 6.7 Hz, 12H), 0.87 (d, *J* = 6.8 Hz, 12H).

<sup>13</sup>C NMR (101 MHz, CDCl<sub>3</sub>) δ 148.5, 147.4, 146.5, 146.4, 144.7, 144.2, 141.9, 141.6, 136.4, 134.2, 133.2, 131.1, 128.9, 126.2, 124.0, 123.0, 64.1, 34.5, 31.7, 31.5, 30.7, 25.6, 24.6, 22.9.

HRMS (ESI+) (*m/z*): [M+Na<sup>+</sup>] calculated for C<sub>104</sub>H<sub>129</sub>SO<sub>2</sub>ClNa, 1499.92940; found, 1499.92505.

**Sodium 5'-(2,6-diisopropylphenyl)-2,2'',6,6''-tetrakisopropyl-4,4''-bis(tris(4-(tert-butyl)phenyl)methyl)-[1,1':3',1''-terphenyl]-2'-sulfonate (Na<sup>+</sup>A7<sup>-</sup>)**

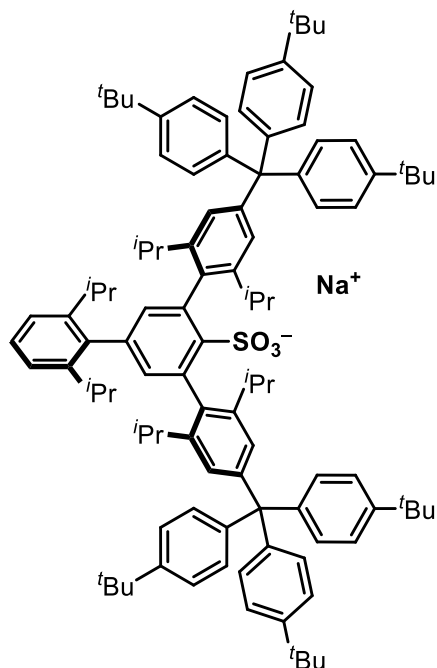

Magnesium (29.6 mg, 1.23 mmol, 6.2 equiv.) was placed in a 10 mL Schlenk flask containing a stirring bar. The flask was closed with a septum, evacuated, flame-dried under vacuum for 1 min and left to cool down to room temperature. Then, the flask was refilled with nitrogen and dry THF (0.3 mL) was added followed by slow addition of 1,2-dibromoethane (0.02 mL). To activate the magnesium, the mixture was repeatedly briefly heated to reflux with a heat gun. Then, it was heated to 60 °C and a solution of **A7\_SO<sub>2</sub>Cl** (291 mg, 0.20 mmol) in dry THF (3 mL) was added dropwise. The resulting mixture was stirred at 60 °C for an additional 1 h. Then, H<sub>2</sub>O (2 mL) was added, the mixture was separated between H<sub>2</sub>O (10 mL) and EtOAc (20 mL), and the aqueous phase was extracted with EtOAc (2 x 10 mL). The combined organic extracts were washed with brine (5 mL), dried over MgSO<sub>4</sub>, filtered, and concentrated under reduced pressure. The residue was dissolved in dry CH<sub>2</sub>Cl<sub>2</sub> (5 mL) and the solution was cooled to 0 °C. Then, a solution of 3-chloroperoxybenzoic acid (77%, 48.6 mg, 0.22 mmol, 1.1 equiv.) in CH<sub>2</sub>Cl<sub>2</sub> (5 mL) was added dropwise. The reaction mixture was stirred at 0 °C for 1 h, then it was diluted with hexanes (50 mL), washed with NaOH (1M aq. soln., 3 x 10 mL), dried over MgSO<sub>4</sub>, filtered, and concentrated under reduced pressure. The residue was purified by column chromatography (10 g of silica gel, CH<sub>2</sub>Cl<sub>2</sub>, 5 CV; then 5% *i*PrOH in CH<sub>2</sub>Cl<sub>2</sub>, 4 CV), the collected fractions were washed with NaOH (5% aq. soln., 2 x 50 mL), filtered through a filter paper, and concentrated under reduced pressure to give the title compound as a colourless solid (272 mg, 93% yield).

<sup>1</sup>H NMR (400 MHz, CDCl<sub>3</sub>) δ 7.32 (t, *J* = 7.7 Hz, 1H), 7.19 – 7.12 (m, 26H), 6.93 (s, 4H), 6.89 (s, 2H), 2.75 (hept, *J* = 6.9 Hz, 2H), 2.67 (hept, *J* = 6.7 Hz, 4H), 1.24 (s, 54H), 1.08 (d, *J* = 6.8 Hz, 12H), 0.94 (d, *J* = 6.7 Hz, 12H), 0.81 (d, *J* = 6.8 Hz, 12H).

<sup>13</sup>C NMR (101 MHz, CDCl<sub>3</sub>) δ 148.2, 147.0, 146.4, 145.6, 144.7, 140.7, 140.5, 139.6, 138.0, 137.4, 132.3, 130.7, 128.2, 125.2, 124.3, 122.8, 64.2, 34.4, 31.5, 31.2, 30.4, 25.5, 24.7, 23.1.

HRMS (ESI-) (*m/z*): [(M-Na<sup>+</sup>)]<sup>-</sup> calculated for C<sub>104</sub>H<sub>129</sub>SO<sub>3</sub>, 1457.96570; found, 1457.96497.

## 2.6 Synthesis of cations present in 7-10

### 4-(2,6-diisopropyl-4-(4,4,5,5-tetramethyl-1,3,2-dioxaborolan-2-yl)phenyl)-2,6-bis(2,4,6-triisopropylphenyl)pyridine (**Bpin\_C4\_N**)

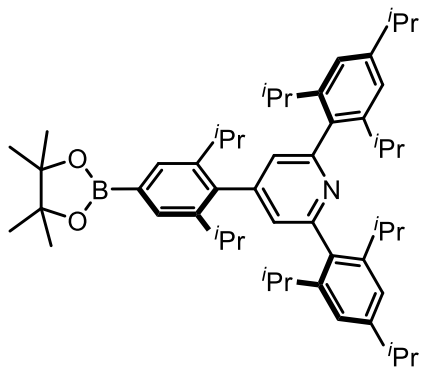

A heat-gun dried 100 mL Schlenk flask was loaded with 4,4'-di-tert-butyl-2,2'-bipyridyl (50 mg, 0.187 mmol, 0.06 equiv.), (1,5-cyclooctadiene)(methoxy)iridium(I) dimer (62 mg, 0.093 mmol, 0.03 equiv.), bis(pinacolato)diboron (0.948 g, 3.73 mmol, 1.2 equiv.), and **C4\_N** (2 g, 3.11 mmol), and was placed under an inert atmosphere with three vacuum/N<sub>2</sub> cycles. THF (20 mL) was added, the flask was sealed and the resulting mixture was stirred at 80 °C for 12 h. Then, the mixture was allowed to cool to room temperature, hexane (20 mL) was added, and the solvent was removed under reduced pressure. The crude material was purified by column chromatography (150 g of silica gel, hexanes/CH<sub>2</sub>Cl<sub>2</sub> 1:1) to give the title compound as a colourless solid (1.98 g, 83% yield).

<sup>1</sup>H NMR (500 MHz, CDCl<sub>3</sub>) δ 7.67 (s, 2H), 7.11 (s, 2H), 7.03 (s, 4H), 2.91 (hept, *J* = 6.8 Hz, 2H), 2.82 – 2.69 (hept, *J* = 6.8 Hz, 2H + hept, *J* = 6.9 Hz, 4H), 1.37 (s, 12H), 1.25 (d, *J* = 6.9 Hz, 12H), 1.20 – 1.14 (d, *J* = 6.9 Hz, 12H + d, *J* = 6.9 Hz, 12H), 1.11 (d, *J* = 6.9 Hz, 12H).

<sup>13</sup>C NMR (126 MHz, CDCl<sub>3</sub>) δ 160.0, 148.8, 148.7, 146.1, 145.3, 140.1, 136.7, 129.3, 124.1, 120.6, 83.9, 34.6, 30.9, 30.8, 25.1, 24.7, 24.3, 24.1, 23.6.

HRMS (ESI+) (*m/z*): [M+H<sup>+</sup>] calculated for C<sub>53</sub>H<sub>77</sub>O<sub>2</sub>NB, 770.60528; found, 770.60455.

### 4,4'-(3,3'',5,5''-tetraisopropyl-[1,1':4',1''-terphenyl]-4,4''-diyl)bis(2,6-bis(2,4,6-triisopropylphenyl)pyridine) (**C8\_N**)

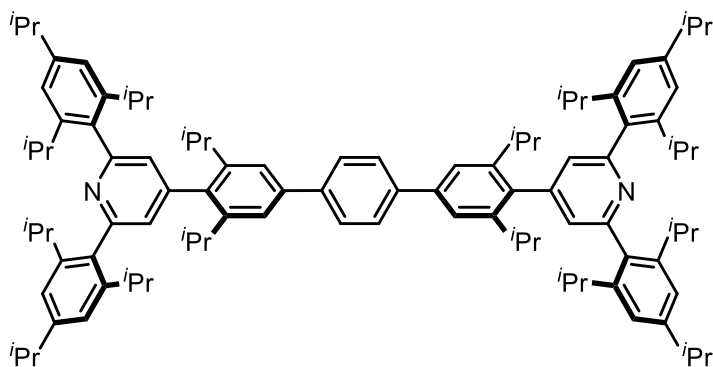

A 25 mL Schlenk flask was loaded with **Bpin\_C4\_N** (549 mg, 0.713 mmol, 2.4 equiv.), 1,4-dibromobenzene (70 mg, 0.297 mmol), Pd(PPh<sub>3</sub>)<sub>4</sub> (68.6 mg, 0.059 mmol, 0.2 equiv.), and K<sub>2</sub>CO<sub>3</sub> (197 mg, 1.43 mmol, 4.8 equiv.) and was placed under an inert atmosphere with three vacuum/N<sub>2</sub> cycles. Then, degassed toluene (3 mL), degassed 1,4-dioxane (3 mL), and degassed H<sub>2</sub>O (3 mL) were added and the resulting suspension was stirred at 100 °C for 18 h. The reaction mixture was allowed to cool to room temperature and NH<sub>4</sub>Cl (sat.

aq. soln. 15 mL) and CH<sub>2</sub>Cl<sub>2</sub> (15 mL) were added. The layers were separated and the aqueous layer was extracted with CH<sub>2</sub>Cl<sub>2</sub> (3 x 15 mL). The combined organic extracts were washed with brine (30 mL), dried over Na<sub>2</sub>SO<sub>4</sub>, filtered, and the solvent was removed under reduced pressure. The residue was purified by column chromatography (125 g of silica gel, hexanes/CH<sub>2</sub>Cl<sub>2</sub> 1:1, 2 CV; hexanes/CH<sub>2</sub>Cl<sub>2</sub> 1:2, 1 CV) to give the title compound as a colourless solid (230 mg, 57% yield).

<sup>1</sup>H NMR (500 MHz, CDCl<sub>3</sub>) δ 7.74 (s, 4H), 7.47 (s, 4H), 7.20 (s, 4H), 7.04 (s, 8H), 2.95 – 2.82 (hept, *J* = 6.9 Hz, 4H + hept, *J* = 6.9 Hz, 4H), 2.80 – 2.69 (m, 8H), 1.26 (d, *J* = 6.9 Hz, 24H), 1.24 – 1.16 (m, 48H, two overlapped doublets), 1.13 (d, *J* = 6.9 Hz, 24H).

<sup>13</sup>C NMR (126 MHz, CDCl<sub>3</sub>) δ 160.0, 148.9, 148.6, 146.7, 146.1, 141.1, 140.8, 136.5, 136.3, 127.7, 124.6, 121.8, 120.6, 34.6, 31.0, 30.9, 24.7, 24.3, 24.2, 23.6.

HRMS (ESI+) (*m/z*): [*M*+2*H*<sup>+</sup>] calculated for C<sub>100</sub>H<sub>134</sub>N<sub>2</sub>, 681.5268; found, 681.52735.

**4,4'-(3,3'',5,5''-tetraisopropyl-[1,1':4',1''-terphenyl]-4,4''-diyl)bis(1-methyl-2,6-bis(2,4,6-triisopropylphenyl)pyridin-1-ium) tetrafluoroborate (C8<sup>2+</sup>(BF<sub>4</sub><sup>-</sup>)<sub>2</sub>)**

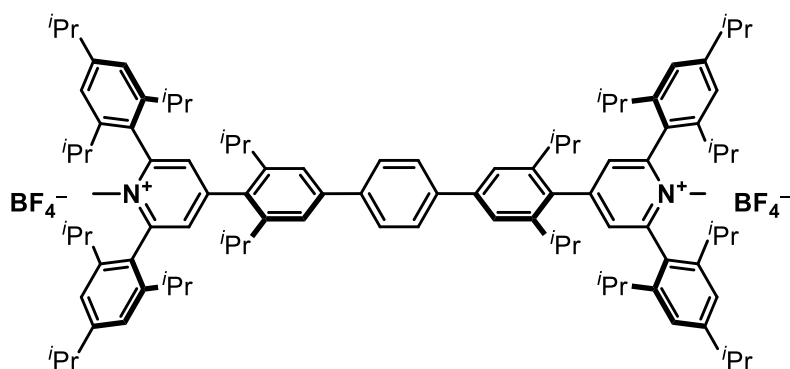

A 10 mL Schlenk flask was loaded with **C8\_N** (201 mg, 0.148 mmol) and placed under an inert atmosphere with three vacuum/N<sub>2</sub> cycles. Dry CH<sub>2</sub>Cl<sub>2</sub> (2.5 mL) was added and the mixture was cooled to 0 °C. Trimethyloxonium tetrafluoroborate (219 mg, 1.48 mmol, 10 equiv.)

was added in one portion and the resulting suspension was stirred at 0 °C for 2.5 h. Then, *N,N*-diisopropylethylamine (191 mg, 0.258 mL, 1.48 mmol, 10 equiv.) was added, followed by the addition of trimethyloxonium tetrafluoroborate (219 mg, 1.48 mmol, 10 equiv.), and the mixture was warmed to room temperature, and stirred for another 30 min. *N,N*-Diisopropylethylamine (191 mg, 0.258 mL, 1.48 mmol, 10 equiv.) was added again, followed by the addition of trimethyloxonium tetrafluoroborate (219 mg, 1.48 mmol, 10 equiv.), and the reaction mixture was stirred for 30 min. After that, it was separated between CH<sub>2</sub>Cl<sub>2</sub> (20 mL) and H<sub>2</sub>O (20 mL), and the aqueous layer was extracted with CH<sub>2</sub>Cl<sub>2</sub> (2 x 20 mL). The combined organic extracts were dried over Na<sub>2</sub>SO<sub>4</sub>, filtered, and the solvent was removed under reduced pressure. The residue was purified by column chromatography (40 g of silica gel, CH<sub>2</sub>Cl<sub>2</sub>, 1 CV; then 10% *i*PrOH in CH<sub>2</sub>Cl<sub>2</sub>, 2 CV), the collected fractions were washed with NaBF<sub>4</sub> (10% aq. soln., 50 mL), filtered through a filter paper and the solvent was removed under reduced pressure. The title compound was obtained as a yellowish solid (180 mg, 78% yield).

$^1\text{H}$  NMR (500 MHz,  $\text{CDCl}_3$ )  $\delta$  7.83 (s, 4H), 7.71 (s, 4H), 7.51 (s, 4H), 7.24 (s, 8H), 3.77 (s, 6H), 3.00 (hept,  $J = 6.9$  Hz, 4H), 2.56 (hept,  $J = 6.8$  Hz, 4H), 2.22 (hept,  $J = 6.9$  Hz, 8H), 1.33 (d,  $J = 6.8$  Hz, 24H), 1.31 (d,  $J = 6.9$  Hz, 24H), 1.25 (d,  $J = 6.8$  Hz, 24H), 1.22 (d,  $J = 6.8$  Hz, 24H).

$^{13}\text{C}$  NMR (126 MHz,  $\text{CDCl}_3$ )  $\delta$  159.5, 157.7, 154.2, 145.8, 145.7, 143.4, 140.3, 131.3, 131.2, 128.0, 125.5, 123.1, 122.6, 64.6, 43.8, 34.7, 32.9, 31.9, 25.5, 24.9, 24.2, 23.9, 23.5.

$^{19}\text{F}$  NMR (471 MHz,  $\text{CDCl}_3$ )  $\delta$  -154.36, -154.41.

HRMS (ESI+) (m/z):  $[\text{M}^{2+}]$  calculated for  $\text{C}_{102}\text{H}_{138}\text{N}_2$ , 695.54245; found, 695.54346.

**4,4'-(3,3'',5,5''-tetraisopropyl-[1,1':3',1''-terphenyl]-4,4''-diyl)bis(2,6-bis(2,4,6-triisopropylphenyl)pyridine) (C9\_N)**

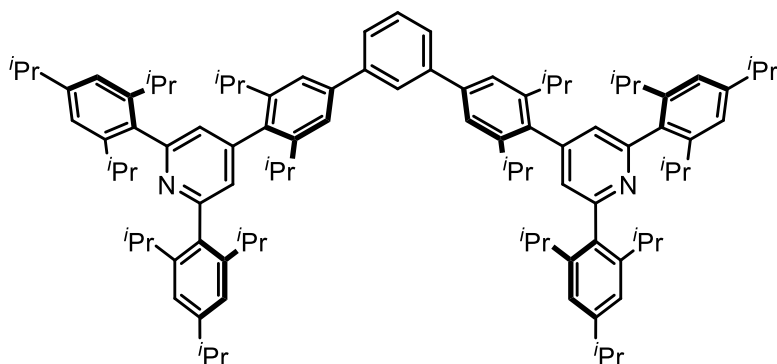

A 10 mL Schlenk flask was loaded with **Bpin\_C4\_N** (235 mg, 0.305 mmol, 2.4 equiv.), 1,3-dibromobenzene (30 mg, 0.127 mmol),  $\text{Pd}(\text{PPh}_3)_4$  (29.4 mg, 0.025 mmol, 0.2 equiv.), and  $\text{K}_2\text{CO}_3$  (84.3 mg, 0.61 mmol, 4.8 equiv.) and was placed under an inert atmosphere with three vacuum/ $\text{N}_2$  cycles. Then, degassed toluene (1 mL), degassed 1,4-dioxane (1 mL), and degassed  $\text{H}_2\text{O}$  (1 mL) were added and the resulting suspension was stirred at  $100^\circ\text{C}$  for 18 h. The reaction mixture was allowed to cool to room temperature and  $\text{NH}_4\text{Cl}$  (sat. aq. soln. 10 mL) and  $\text{CH}_2\text{Cl}_2$  (10 mL) were added. The layers were separated and the aqueous layer was extracted with  $\text{CH}_2\text{Cl}_2$  (3 x 10 mL). The combined organic extracts were washed with brine (15 mL), dried over  $\text{Na}_2\text{SO}_4$ , filtered, and the solvent was removed under reduced pressure. The residue was purified by column chromatography (25 g of silica gel, hexanes/ $\text{CH}_2\text{Cl}_2$  1:1, 2 CV) to give the title compound as a white solid (129 mg, 75% yield).

Then, degassed toluene (1 mL), degassed 1,4-dioxane (1 mL), and degassed  $\text{H}_2\text{O}$  (1 mL) were added and the resulting suspension was stirred at  $100^\circ\text{C}$  for 18 h. The reaction mixture was allowed to cool to room temperature and  $\text{NH}_4\text{Cl}$  (sat. aq. soln. 10 mL) and  $\text{CH}_2\text{Cl}_2$  (10 mL) were added. The layers were separated and the aqueous layer was extracted with  $\text{CH}_2\text{Cl}_2$  (3 x 10 mL). The combined organic extracts were washed with brine (15 mL), dried over  $\text{Na}_2\text{SO}_4$ , filtered, and the solvent was removed under reduced pressure. The residue was purified by column chromatography (25 g of silica gel, hexanes/ $\text{CH}_2\text{Cl}_2$  1:1, 2 CV) to give the title compound as a white solid (129 mg, 75% yield).

$^1\text{H}$  NMR (400 MHz,  $\text{CDCl}_3$ )  $\delta$  7.85 (t,  $J = 1.8$  Hz, 1H), 7.65 – 7.60 (m, 2H), 7.56 (dd,  $J = 8.8, 6.3$  Hz, 1H), 7.48 (s, 4H), 7.19 (s, 4H), 7.04 (s, 8H), 2.97 – 2.82 (m, 8H), 2.76 (hept,  $J = 6.9$  Hz, 8H), 1.26 (d,  $J = 7.0$  Hz, 24H), 1.20 (d,  $J = 7.0$  Hz, 24H, overlapped), 1.19 (d,  $J = 7.0$  Hz, 24H, overlapped), 1.13 (d,  $J = 6.9$  Hz, 24H).

$^{13}\text{C}$  NMR (101 MHz,  $\text{CDCl}_3$ )  $\delta$  160.0, 148.9, 146.8, 146.1, 142.5, 141.6, 136.6, 136.4, 129.3, 126.56, 126.51, 124.54, 124.52, 122.1, 120.6, 34.6, 31.0, 30.8, 24.7, 24.3, 24.2, 23.6.

HRMS (ESI+) (m/z):  $[\text{M}+2\text{H}^+]$  calculated for  $\text{C}_{100}\text{H}_{134}\text{N}_2$ , 681.52680; found, 681.52679.

**4,4'-(3,3'',5,5''-tetraisopropyl-[1,1':3',1''-terphenyl]-4,4''-diyl)bis(1-methyl-2,6-bis(2,4,6-triisopropylphenyl)pyridin-1-ium) tetrafluoroborate (C<sub>9</sub><sup>2+</sup>(BF<sub>4</sub><sup>-</sup>)<sub>2</sub>)**

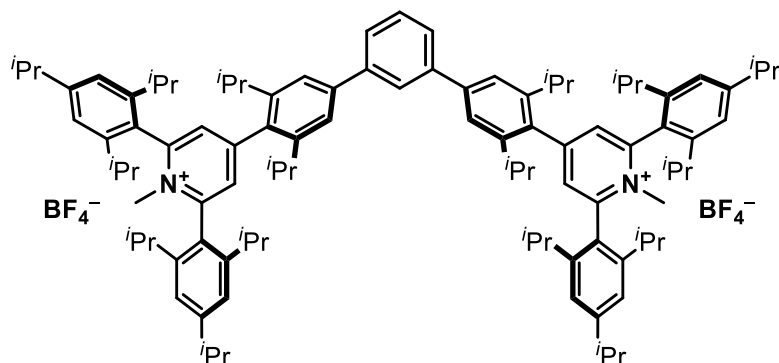

A 10 mL Schlenk flask was loaded with **C9\_N** (84 mg, 0.062 mmol) and placed under an inert atmosphere with three vacuum/N<sub>2</sub> cycles. Dry CH<sub>2</sub>Cl<sub>2</sub> (2 mL) was added and the mixture was cooled to 0 °C. Trimethyloxonium tetrafluoroborate (45.6 mg, 0.31 mmol, 5 equiv.) was added

in one portion and the resulting suspension was stirred at 0 °C for 20 min and then at 25 °C for 10 min. Then, the reaction mixture was cooled to 0 °C and *N,N*-diisopropylethylamine (40 mg, 0.05 mL, 0.31 mmol, 5 equiv.) was added, followed by the addition of trimethyloxonium tetrafluoroborate (45.6 mg, 0.31 mmol, 5 equiv.), and the mixture was warmed to room temperature, and stirred for another 30 min. After that, it was separated between CH<sub>2</sub>Cl<sub>2</sub> (10 mL) and H<sub>2</sub>O (10 mL) and the aqueous layer was extracted with CH<sub>2</sub>Cl<sub>2</sub> (2 x 5 mL). The combined organic extracts were dried over Na<sub>2</sub>SO<sub>4</sub>, filtered, and the solvent was removed under reduced pressure. The residue was purified by column chromatography (10 g of silica gel, CH<sub>2</sub>Cl<sub>2</sub>, 1 CV; then 10% *i*PrOH in CH<sub>2</sub>Cl<sub>2</sub>, 2 CV), the collected fractions were washed with NaBF<sub>4</sub> (10% aq. soln., 50 mL), filtered through a filter paper, and the solvent was evaporated under reduced pressure. The title compound was obtained as a yellowish solid (91 mg, 93% yield).

<sup>1</sup>H NMR (400 MHz, CDCl<sub>3</sub>) δ 7.83 (s, 4H), 7.67 (s, 1H), 7.62 – 7.58 (m, 3H), 7.49 (s, 4H), 7.24 (s, 8H), 3.75 (s, 6H), 2.99 (hept, *J* = 6.9 Hz, 4H), 2.55 (hept, *J* = 6.8 Hz, 4H), 2.21 (hept, *J* = 6.8 Hz, 8H), 1.33 (d, *J* = 6.9 Hz, 24H), 1.30 (d, *J* = 6.9 Hz, 24H), 1.24 (d, *J* = 6.9 Hz, 24H, overlapped), 1.22 (d, *J* = 6.9 Hz, 24H, overlapped).

<sup>13</sup>C NMR (101 MHz, CDCl<sub>3</sub>) δ 159.5, 157.7, 154.2, 145.9, 145.7, 143.9, 141.6, 131.4, 131.2, 129.8, 127.1, 126.4, 125.4, 123.0, 122.8, 43.7, 34.6, 32.8, 31.9, 24.9, 24.1, 23.9, 23.4.

<sup>19</sup>F NMR (377 MHz, CDCl<sub>3</sub>) δ -154.34, -154.39.

HRMS (ESI+) (*m/z*): [M<sup>2+</sup>] calculated for C<sub>102</sub>H<sub>138</sub>N<sub>2</sub>, 695.54245; found, 695.54266.



**4,4'-(5'-(4-(2,6-bis(2,4,6-triisopropylphenyl)pyridin-4-yl)-3,5-diisopropylphenyl)-3,3'',5,5''-tetraisopropyl-[1,1':3',1''-terphenyl]-4,4''-diyl)bis(2,6-bis(2,4,6-triisopropylphenyl)pyridine) (C10\_N)**

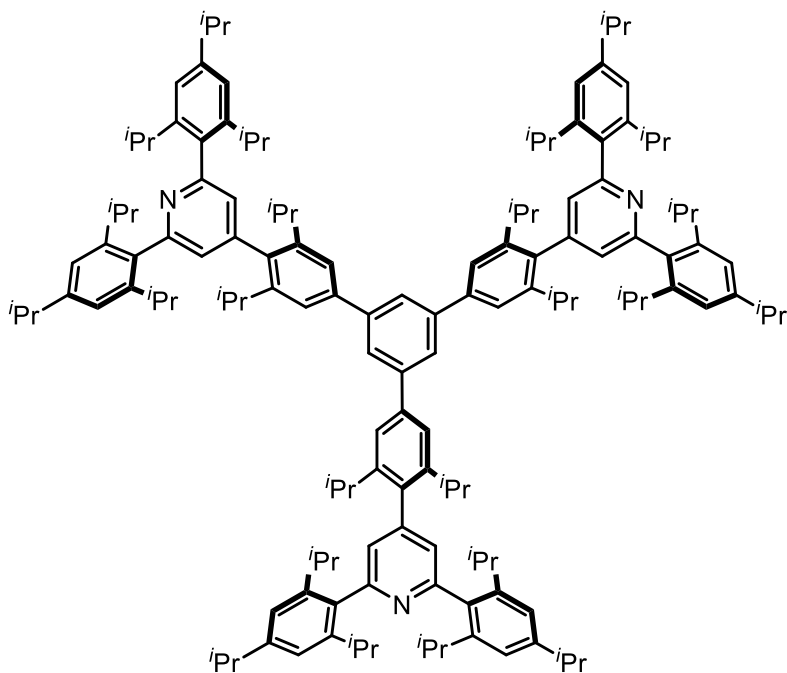

A 25 mL Schlenk flask was loaded with **Bpin\_C4\_N** (693 mg, 0.9 mmol, 3.6 equiv.), 1,3,5-tribromobenzene (80 mg, 0.249 mmol), Pd(PPh<sub>3</sub>)<sub>4</sub> (43.3 mg, 0.037 mmol, 0.15 equiv.), and K<sub>2</sub>CO<sub>3</sub> (249 mg, 1.8 mmol, 7.2 equiv.) and was placed under an inert atmosphere with three vacuum/N<sub>2</sub> cycles. Then, degassed toluene (3 mL), degassed 1,4-dioxane (3 mL), and degassed H<sub>2</sub>O (3 mL) were added and the resulting suspension was stirred at 100 °C for 18 h. The reaction mixture was allowed to cool to room

temperature and NH<sub>4</sub>Cl (sat. aq. soln. 15 mL) and CH<sub>2</sub>Cl<sub>2</sub> (15 mL) were added. The layers were separated and the aqueous layer was extracted with CH<sub>2</sub>Cl<sub>2</sub> (3 x 15 mL). The combined organic extracts were washed with brine (30 mL), dried over Na<sub>2</sub>SO<sub>4</sub>, filtered, and the solvent was removed under reduced pressure. The residue was purified by column chromatography (100 g of silica gel, hexanes/CH<sub>2</sub>Cl<sub>2</sub> 1:1, 2 CV; hexanes/CH<sub>2</sub>Cl<sub>2</sub> 1:2, 1 CV) to give the title compound as a white solid (300 mg, 60% yield).

<sup>1</sup>H NMR (500 MHz, CDCl<sub>3</sub>) δ 7.82 (s, 3H), 7.55 (s, 6H), 7.21 (s, 6H), 7.04 (s, 12H), 2.96 – 2.83 (hept, J = 6.9 Hz, 6H + hept, J = 6.9 Hz, 6H), 2.79 – 2.68 (m, 12H), 1.26 (d, J = 6.9 Hz, 36H), 1.20 (d, J = 6.9 Hz, 36H, overlapped), 1.19 (d, J = 6.9 Hz, 36H, overlapped), 1.13 (d, J = 6.9 Hz, 36H).

<sup>13</sup>C NMR (126 MHz, CDCl<sub>3</sub>) δ 160.0, 149.0, 148.6, 146.9, 146.1, 143.1, 141.79, 141.77, 136.5, 125.9, 124.6, 122.3, 120.7, 34.6, 31.1, 30.9, 24.7, 24.25, 24.23, 23.6.

HRMS (ESI+) (m/z): [M+3H<sup>+</sup>] calculated for C<sub>147</sub>H<sub>198</sub>N<sub>3</sub>, 668.51898; found, 668.52039.

**C10<sup>3+</sup>(BF<sub>4</sub><sup>-</sup>)<sub>3</sub>**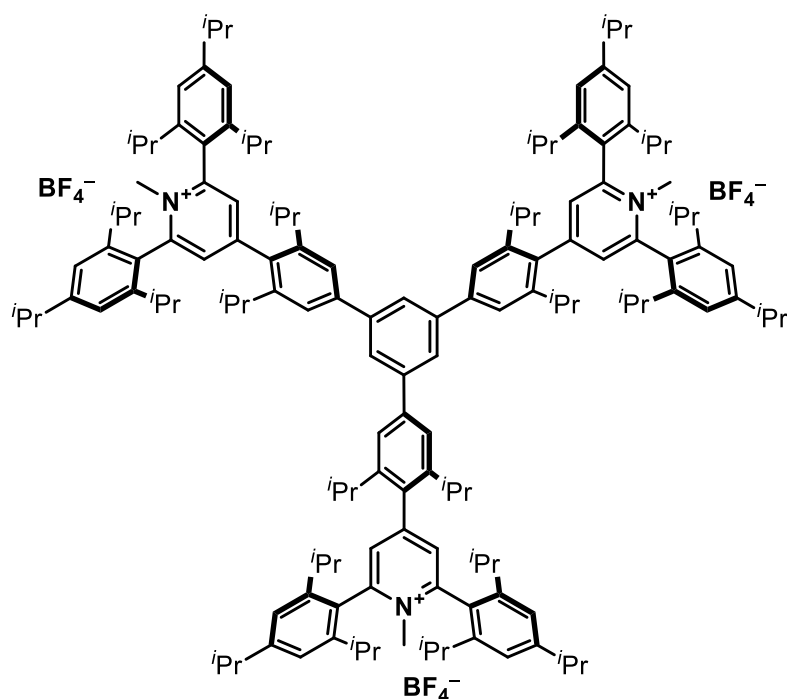

A 10 mL Schlenk flask was loaded with **C10\_N** (268 mg, 0.134 mmol) and placed under an inert atmosphere with three vacuum/N<sub>2</sub> cycles. Dry CH<sub>2</sub>Cl<sub>2</sub> (3.5 mL) was added and the mixture was cooled to 0 °C. Trimethyloxonium tetrafluoroborate (313 mg, 2.01 mmol, 15 equiv.) was added in one portion and the resulting suspension was stirred at 0 °C for 2 h. Then, *N,N*-diisopropylethylamine (260 mg, 0.35 mL, 2.01 mmol, 15 equiv.) was added, followed by the addition of trimethyloxonium tetrafluoroborate

(313 mg, 2.01 mmol, 15 equiv.), and the mixture was warmed to room temperature, and stirred for 30 min. *N,N*-diisopropylethylamine (260 mg, 0.35 mL, 2.01 mmol, 15 equiv.) was added again, followed by the addition of trimethyloxonium tetrafluoroborate (313 mg, 2.01 mmol, 15 equiv.), and the reaction mixture was stirred for another 30 min. Then, *N,N*-diisopropylethylamine (260 mg, 0.35 mL, 2.01 mmol, 15 equiv.) was added once again, followed by the addition of trimethyloxonium tetrafluoroborate (313 mg, 2.01 mmol, 15 equiv.), and the reaction mixture was stirred for 5 min. After that, it was separated between CH<sub>2</sub>Cl<sub>2</sub> (20 mL) and H<sub>2</sub>O (20 mL) and the aqueous layer was extracted with CH<sub>2</sub>Cl<sub>2</sub> (2 x 20 mL). The combined organic extracts were dried over Na<sub>2</sub>SO<sub>4</sub>, filtered, and the solvent was removed under reduced pressure. The residue was purified by column chromatography (50 g of silica gel, CH<sub>2</sub>Cl<sub>2</sub>, 1 CV; then 10% *i*PrOH in CH<sub>2</sub>Cl<sub>2</sub>, 3 CV), the collected fractions were washed with NaBF<sub>4</sub> (10% aq. soln., 50 mL), filtered through a filter paper, and the solvent was evaporated under reduced pressure. The title compound was obtained as greenish crystals (235 mg, 76% yield).

<sup>1</sup>H NMR (500 MHz, CDCl<sub>3</sub>) δ 7.84 (s, 6H), 7.66 (s, 3H), 7.52 (s, 6H), 7.23 (s, 12H), 3.72 (s, 9H), 2.99 (hept, *J* = 6.9 Hz, 6H), 2.57 (hept, *J* = 6.9 Hz, 6H), 2.19 (hept, *J* = 6.7 Hz, 12H), 1.31 (d, *J* = 6.8 Hz, 36H, overlapped), 1.30 (d, *J* = 6.8 Hz, 36H, overlapped), 1.24 (d, *J* = 6.8 Hz, 36H), 1.21 (d, *J* = 6.8 Hz, 36H).

<sup>13</sup>C NMR (126 MHz, CDCl<sub>3</sub>) δ 159.5, 157.7, 154.2, 146.0, 145.7, 143.7, 142.6, 131.7, 131.2, 126.2, 125.4, 123.05, 123.00, 43.6, 34.6, 32.8, 31.9, 24.9, 24.1, 23.9, 23.4.

<sup>19</sup>F NMR (471 MHz, CDCl<sub>3</sub>) δ -154.36, -154.41.

HRMS (ESI+) (*m/z*): [M<sup>3+</sup>] calculated for C<sub>150</sub>H<sub>204</sub>N<sub>3</sub>, 682.53463; found, 682.5351.

## 2.7 Synthesis of anions present in 9-10

### Ethyl 5'-(2,6-diisopropylphenyl)-2,2'',4,4'',6,6''-hexaisopropyl-[1,1':3',1''-terphenyl]-2'-sulfonate (A4\_SO<sub>3</sub>Et)

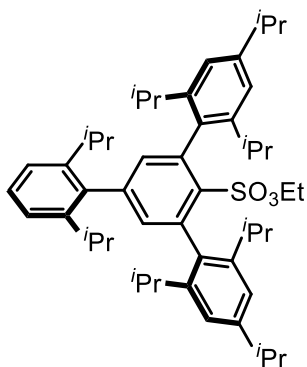

A 25 mL Schlenk flask was loaded with **Na<sup>+</sup>A4<sup>-</sup>** (280 mg, 0.376 mmol) and placed under an inert atmosphere with three vacuum/N<sub>2</sub> cycles. Dry CH<sub>2</sub>Cl<sub>2</sub> (5 mL) was added and the mixture was cooled to 0 °C. Triethyloxonium tetrafluoroborate (357 mg, 1.88 mmol, 5 equiv.) was added in one portion and the resulting suspension was stirred at 0 °C for 2 h. Then, H<sub>2</sub>O (10 mL) was added to the reaction mixture, it was extracted with CH<sub>2</sub>Cl<sub>2</sub> (3 x 15 mL), and the combined organic extracts

were washed with brine (10 mL), dried over Na<sub>2</sub>SO<sub>4</sub>, filtered, and the solvent was removed under reduced pressure. The residue was purified by column chromatography (20 g of silica gel, hexanes/CH<sub>2</sub>Cl<sub>2</sub> 1:1), to afford the title compound as a colourless solid (235 mg, 83% yield).

<sup>1</sup>H NMR (400 MHz, CDCl<sub>3</sub>) δ 7.30 (t, *J* = 7.8 Hz, 1H), 7.15 (d, *J* = 7.8 Hz, 2H), 7.13 (s, 2H), 7.02 (s, 4H), 3.50 (q, *J* = 7.1 Hz, 2H), 2.92 (hept, *J* = 6.9 Hz, 2H), 2.77 – 2.62 (hept, *J* = 6.9 Hz, 2H + hept, *J* = 6.9 Hz, 4H), 1.29 (d, *J* = 6.9 Hz, 12H), 1.27 (d, *J* = 6.9 Hz, 12H), 1.10 (d, *J* = 6.9 Hz, 12H), 1.07 (d, *J* = 6.9 Hz, 12H), 0.91 (t, *J* = 7.2 Hz, 3H).

<sup>13</sup>C NMR (101 MHz, CDCl<sub>3</sub>) δ 148.3, 146.6, 146.2, 144.2, 141.2, 136.8, 135.5, 135.1, 133.3, 128.5, 122.7, 120.5, 64.4, 34.3, 31.5, 30.6, 25.7, 24.6, 24.2, 23.2, 15.4.

HRMS (ESI+) (*m/z*): [M+H<sup>+</sup>] calculated for C<sub>50</sub>H<sub>71</sub>O<sub>3</sub>S, 751.51184; found, 751.51123.

### Ethyl 5'-(2,6-diisopropyl-4-(4,4,5,5-tetramethyl-1,3,2-dioxaborolan-2-yl)phenyl)-2,2'',4,4'',6,6''-hexaisopropyl-[1,1':3',1''-terphenyl]-2'-sulfonate (Bpin\_A4\_SO<sub>3</sub>Et)

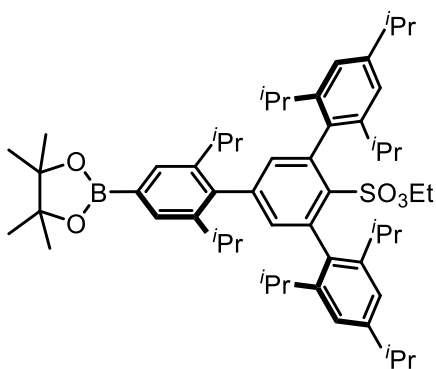

A flame dried 10 mL Schlenk flask was loaded with 4,4'-di-tert-butyl-2,2'-bipyridyl (4.93 mg, 0.018 mmol, 0.06 equiv.), (1,5-cyclooctadiene)(methoxy)iridium(I) dimer (6.09 mg, 0.009 mmol, 0.03 equiv.), bis(pinacolato)diboron (117 mg, 0.459 mmol, 1.5 equiv.), and **A4\_SO<sub>3</sub>Et** (230 mg, 0.306 mmol) and was placed under an inert atmosphere with three vacuum/N<sub>2</sub> cycles. THF (4 mL) was added, the flask was sealed, and the resulting mixture was stirred at 80 °C for 12 h. Then, the mixture

was allowed to cool to room temperature, hexane (5 mL) was added, and the solvent was removed under reduced pressure. The residue was purified by column chromatography (25 g of silica gel, hexanes/CH<sub>2</sub>Cl<sub>2</sub> 1:1) to give the title compound as a colourless solid (195 mg, 73% yield).

$^1\text{H}$  NMR (500 MHz,  $\text{CDCl}_3$ )  $\delta$  7.61 (s, 2H), 7.10 (s, 2H), 7.02 (s, 4H), 3.49 (q,  $J = 7.1$  Hz, 2H), 2.92 (hept,  $J = 6.9$  Hz, 2H), 2.72 (hept,  $J = 6.9$  Hz, 2H), 2.66 (hept,  $J = 6.9$  Hz, 4H), 1.36 (s, 12H), 1.29 (d,  $J = 6.8$  Hz, 12H), 1.27 (d,  $J = 6.8$  Hz, 12H), 1.13 (d,  $J = 6.9$  Hz, 12H), 1.06 (d,  $J = 6.8$  Hz, 12H), 0.91 (t,  $J = 7.1$  Hz, 3H).

$^{13}\text{C}$  NMR (126 MHz,  $\text{CDCl}_3$ )  $\delta$  148.2, 146.2, 145.7, 144.2, 141.3, 139.9, 135.6, 135.0, 133.0, 129.2, 120.5, 83.8, 64.4, 34.3, 31.5, 30.6, 25.7, 25.0, 24.6, 24.2, 23.1, 15.4.

HRMS (ESI+) ( $m/z$ ):  $[\text{M}+\text{H}^+]$  calculated for  $\text{C}_{56}\text{H}_{82}\text{BO}_5\text{S}$ , 876.60068; found, 876.59814.

**Ethyl 2,2'',4,6,6''-penta-isopropyl-5'-(2,4,6-triisopropylphenyl)-4'''-(5,15,20-triphenylporphyrin-10-yl)-[1,1':3',1'':4'',1'''-quaterphenyl]-6'-sulfonate (A8\_SO<sub>3</sub>Et)**

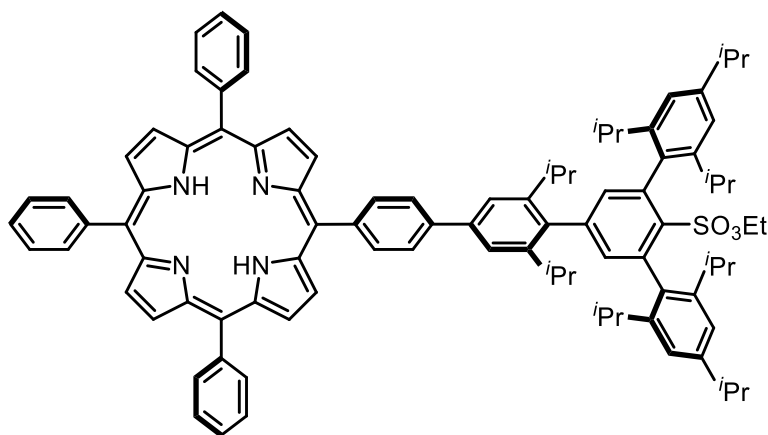

A 10 mL Schlenk flask was loaded with **Bpin\_A4\_SO<sub>3</sub>Et** (100 mg, 0.114 mmol), 5-(4-iodophenyl)-10,15,20-triphenylporphyrin<sup>9</sup> (92.9 mg, 0.125 mmol, 1.1 equiv.),  $\text{Pd}(\text{PPh}_3)_4$  (26.3 mg, 0.023 mmol, 0.2 equiv.), and  $\text{Na}_2\text{CO}_3$  (12.1 mg, 0.114 mmol, 1 equiv.) and was placed under an inert atmosphere with three vacuum/ $\text{N}_2$  cycles.

Then, degassed toluene (0.5 mL), degassed 1,4-dioxane (1 mL), and degassed  $\text{H}_2\text{O}$  (0.5 mL) were added and the resulting suspension was stirred at 75 °C for 18 h. The reaction mixture was allowed to cool to room temperature and  $\text{NH}_4\text{Cl}$  (sat. aq. soln. 10 mL) was added, it was extracted with  $\text{CH}_2\text{Cl}_2$  (3 x 10 mL), and the combined organic extracts were washed with brine (30 mL), dried over  $\text{Na}_2\text{SO}_4$ , filtered, and the solvent was removed under reduced pressure. The residue was purified by column chromatography (25 g of silica gel, hexanes/ $\text{CH}_2\text{Cl}_2$  1:1) to give the title compound as a dark-purple solid (80 mg, 52% yield).

$^1\text{H}$  NMR (500 MHz,  $\text{C}_6\text{D}_6$ )  $\delta$  9.11 (d,  $J = 4.8$  Hz, 2H), 9.01 (d,  $J = 4.8$  Hz, 2H), 8.94 (s, 4H), 8.34 (d,  $J = 8.0$  Hz, 2H), 8.16 – 8.09 (m, 6H), 8.06 (d,  $J = 8.1$  Hz, 2H), 7.88 (s, 2H), 7.52 – 7.40 (m, 9H), 7.27 (s, 2H), 7.24 (s, 4H), 3.47 (q,  $J = 7.1$  Hz, 2H), 3.12 – 3.00 (m, 6H), 2.89 (hept,  $J = 6.9$  Hz, 2H), 1.56 (d,  $J = 6.7$  Hz, 12H), 1.32 (d,  $J = 6.8$  Hz, 12H), 1.29 (d,  $J = 6.9$  Hz, 12H), 1.26 (d,  $J = 6.8$  Hz, 12H), 0.67 (t,  $J = 7.1$  Hz, 3H), -2.04 (s, 2H).

$^{13}\text{C}$  NMR (126 MHz,  $\text{C}_6\text{D}_6$ )  $\delta$  148.8, 148.6, 147.7, 146.77, 146.75, 146.2, 144.4, 144.2, 142.9, 142.8, 142.2, 141.8, 141.72, 141.67, 141.5, 137.0, 136.7, 136.0, 135.7, 134.9, 133.9, 133.5, 132.5, 132.4, 131.59, 131.57, 129.9, 128.4, 127.0, 126.0, 122.4, 120.84, 120.81, 120.7, 120.4, 64.3, 34.8, 32.0, 31.1, 26.0, 24.9, 24.4, 23.6, 15.3.

HRMS (ESI+) ( $m/z$ ):  $[\text{M}+\text{H}^+]$  calculated for  $\text{C}_{94}\text{H}_{99}\text{O}_3\text{N}_4\text{S}$ , 1363.74324; found, 1363.74494.

**Sodium 2,2'',4,6,6''-penta-isopropyl-5'-(2,4,6-triisopropylphenyl)-4'''-(5,15,20-triphenylporphyrin-10-yl)-[1,1':3',1'':4'',1'''-quaterphenyl]-6'-sulfonate (Na<sup>+</sup>A8<sup>-</sup>)**

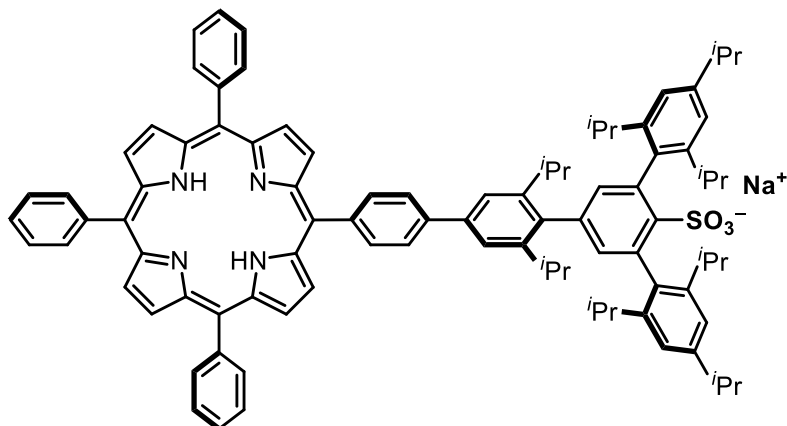

The reaction was performed in an N<sub>2</sub>-filled glovebox. **A8\_SO<sub>3</sub>Et** (70 mg, 0.051 mmol) was dissolved in THF (1 mL) and *t*-BuOK (23 mg, 0.205 mmol, 4 equiv.) was added at room temperature. The reaction mixture was stirred for 12 h, then taken out of the glovebox and 3 drops of water and CH<sub>2</sub>Cl<sub>2</sub> (2 mL) were

added. The suspension was loaded directly on a silica gel column (20 g of silica gel) and purified by column chromatography (CH<sub>2</sub>Cl<sub>2</sub>, 1 CV; then 10% *i*PrOH in CH<sub>2</sub>Cl<sub>2</sub>, 3 CV), the collected fractions were washed with NaOH (5% aq. soln., 2 x 50 mL), dried over Na<sub>2</sub>SO<sub>4</sub>, filtered, and concentrated under reduced pressure to give the title compound as a dark-red solid (49 mg, 70% yield).

<sup>1</sup>H NMR (500 MHz, CDCl<sub>3</sub>) δ 8.99 (d, *J* = 4.8 Hz, 2H), 8.93 – 8.84 (m, 6H), 8.32 (d, *J* = 7.9 Hz, 2H), 8.29 – 8.21 (m, 6H), 8.03 (d, *J* = 7.9 Hz, 2H), 7.83 – 7.74 (m, 9H), 7.71 (s, 2H), 7.12 (s, 2H), 7.02 (s, 4H), 3.02 – 2.89 (m, 4H), 2.81 (hept, *J* = 6.8 Hz, 4H), 1.33 (d, *J* = 6.9 Hz, 12H), 1.30 – 1.28 (m, 12H), 1.26 (d, *J* = 6.8 Hz, 12H), 1.12 (d, *J* = 6.7 Hz, 12H), -2.71 (s, 2H).

<sup>13</sup>C NMR (126 MHz, CDCl<sub>3</sub>) δ 147.7, 147.4, 147.3, 147.1, 147.0, 146.0, 142.35, 142.33, 141.2, 141.1, 141.0, 140.4, 140.2, 139.6, 139.4, 137.6, 137.4, 135.2, 134.7, 132.5, 132.3, 132.2, 132.0, 131.3 (broad), 128.7, 128.6, 127.9, 126.8, 125.6, 121.8, 120.31, 120.29, 120.1, 119.8, 119.7, 34.2, 31.4, 30.7, 25.7, 24.9, 24.4, 23.4.

HRMS (ESI-) (*m/z*): [M-Na<sup>+</sup>] calculated for C<sub>92</sub>H<sub>93</sub>O<sub>3</sub>N<sub>4</sub>S, 1333.69629; found, 1333.69748.

**Palladium (II) sodium 10-(2,2'',4,6,6''-penta-isopropyl-6'-sulfonato-5'-(2,4,6-triisopropylphenyl)-[1,1':3',1'':4'',1'''-quaterphenyl]-4'''-yl)-5,15,20-triphenylporphyrin-21,23-diide (Na<sup>+</sup>A<sup>9-</sup>)**

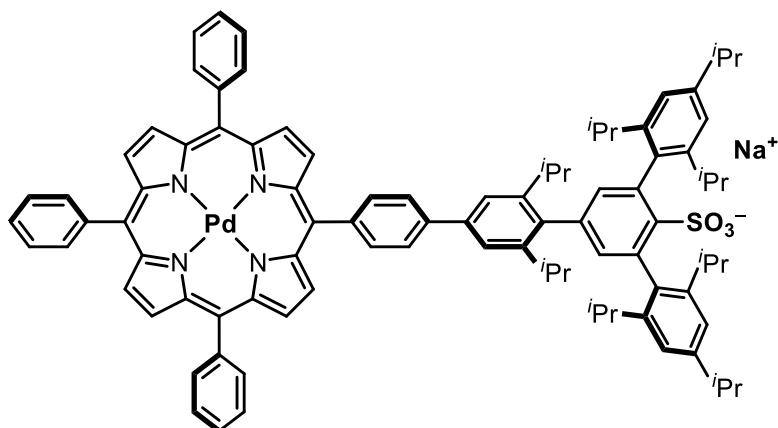

The reaction was performed in an N<sub>2</sub>-filled glovebox. Na<sup>+</sup>A<sup>8-</sup> (42 mg, 0.031 mmol) was dissolved in C<sub>6</sub>D<sub>6</sub> (1 mL) and bis(benzonitrile)palladium (II) 1,1,1,3,3,3-hexafluoro-2-(trifluoromethyl)propan-2-olate<sup>10</sup> (29 mg, 0.037 mmol, 1.2 equiv.) was added in one portion. The reaction mixture was stirred for 12 h at room temperature

(until the starting material was consumed based on the absence of the characteristic signal from porphyrin N-H protons at -2.7 ppm in the <sup>1</sup>H NMR spectrum). Then, the mixture was loaded on a silica gel column (15 g of silica gel) and purified by column chromatography (10% *i*PrOH in CH<sub>2</sub>Cl<sub>2</sub> 3 CV), the collected fractions were washed with NaOH (5% aq. soln., 2 x 10 mL), dried over Na<sub>2</sub>SO<sub>4</sub>, filtered, and concentrated under reduced pressure to give the title compound as a red solid (42 mg, 93% yield).

<sup>1</sup>H NMR (500 MHz, CDCl<sub>3</sub>) δ 8.93 (d, *J* = 4.9 Hz, 2H), 8.85 – 8.77 (m, 6H), 8.25 (d, *J* = 8.2 Hz, 2H), 8.21 – 8.14 (m, 6H), 7.98 (d, *J* = 8.2 Hz, 2H), 7.80 – 7.72 (m, 9H), 7.67 (s, 2H), 7.08 (s, 2H), 6.99 (s, 4H), 2.98 – 2.88 (m, 4H), 2.84 – 2.74 (m, 4H), 1.32 – 1.25 (m, 36H, overlapped with the signal from grease), 1.11 (d, *J* = 6.9 Hz, 12H).

<sup>13</sup>C NMR (126 MHz, CDCl<sub>3</sub>) δ 147.96, 147.65, 147.43, 146.83, 141.94, 141.76, 141.74, 141.18, 140.76, 140.44, 139.68, 139.65, 137.36, 137.29, 134.69, 134.27, 132.78, 131.25, 131.16, 128.47, 128.22, 127.92, 126.87, 125.57, 121.91, 121.78, 121.71, 120.04, 119.97, 34.30, 31.38, 30.73, 25.60, 24.88, 24.36, 23.40.

HRMS (ESI-) (*m/z*): [M-Na<sup>+</sup>] calculated for C<sub>92</sub>H<sub>91</sub>N<sub>4</sub>O<sub>3</sub>PdS, 1437.5852; found, 1437.5892.

## A10\_SO<sub>3</sub>Et

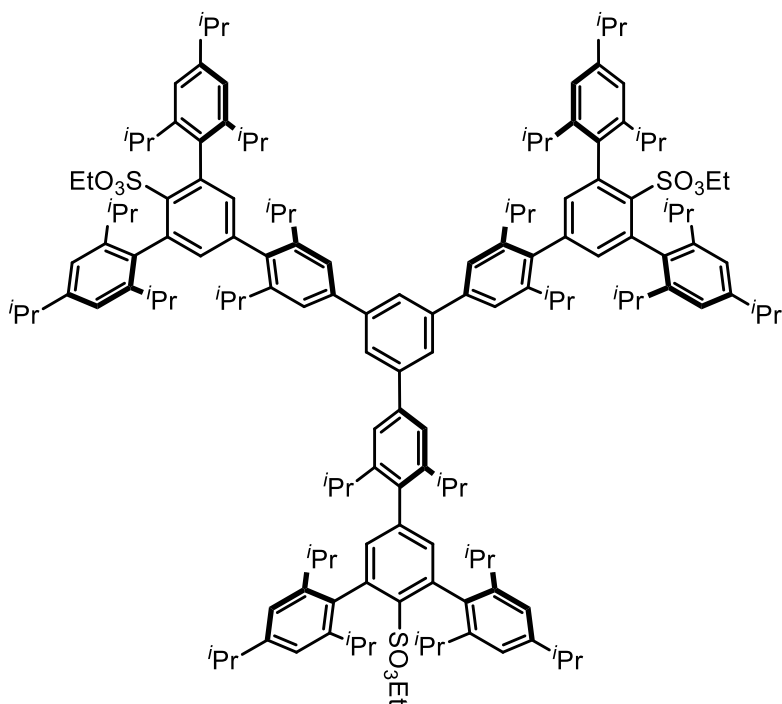

A 10 mL Schlenk flask was loaded with **Bpin\_A4\_SO<sub>3</sub>Et** (95.5 mg, 0.109 mmol, 3.5 equiv.), 1,3,5-tribromobenzene (10 mg, 0.031 mmol), Pd(PPh<sub>3</sub>)<sub>4</sub> (10.8 mg, 0.009 mmol, 0.3 equiv.), and Na<sub>2</sub>CO<sub>3</sub> (23.1 mg, 0.218 mmol, 7 equiv.) and was placed under an inert atmosphere with three vacuum/N<sub>2</sub> cycles. Then, degassed toluene (1 mL), degassed 1,4-dioxane (1 mL), and degassed H<sub>2</sub>O (1 mL) were added and the resulting suspension was stirred at 85 °C for 18 h. The reaction mixture was allowed to cool to room temperature and NH<sub>4</sub>Cl (sat. aq. soln. 10 mL)

was added, it was extracted with CH<sub>2</sub>Cl<sub>2</sub> (3 x 10 mL), and the combined organic extracts were washed with brine (30 mL), dried over Na<sub>2</sub>SO<sub>4</sub>, filtered, and the solvent was removed under reduced pressure. The residue was dissolved in dry CH<sub>2</sub>Cl<sub>2</sub> (1 mL) under an N<sub>2</sub> atmosphere and the mixture was cooled to 0 °C. Triethyloxonium tetrafluoroborate (88.6 mg, 0.466 mmol, 15 equiv.) was added in one portion and the resulting suspension was stirred at 25 °C for 24 h. Then, H<sub>2</sub>O (10 mL) was added to the reaction mixture, it was extracted with CH<sub>2</sub>Cl<sub>2</sub> (3 x 15 mL), and the combined organic extracts were washed with brine (10 mL), dried over Na<sub>2</sub>SO<sub>4</sub>, filtered, and the solvent was removed under reduced pressure. The residue was purified by column chromatography (20 g of silica gel, hexanes/CH<sub>2</sub>Cl<sub>2</sub> 1:1), to afford the title compound as a colourless solid (55 mg, 76% yield).

<sup>1</sup>H NMR (500 MHz, CDCl<sub>3</sub>) δ 7.68 (s, 3H), 7.43 (s, 6H), 7.16 (s, 6H), 7.01 (s, 12H), 3.50 (q, *J* = 7.2 Hz, 6H), 2.91 (hept, *J* = 6.8 Hz, 6H), 2.79 (hept, *J* = 6.8 Hz, 6H), 2.66 (hept, *J* = 6.9 Hz, 12H), 1.28 (d, *J* = 6.9 Hz, 36H, overlapped), 1.27 (d, *J* = 6.9 Hz, 36H, overlapped), 1.14 (d, *J* = 6.8 Hz, 36H), 1.06 (d, *J* = 6.8 Hz, 36H), 0.91 (t, *J* = 7.2 Hz, 9H).

<sup>13</sup>C NMR (126 MHz, CDCl<sub>3</sub>) δ 148.3, 147.3, 146.2, 143.8, 143.1, 141.6, 141.4, 136.5, 135.7, 135.0, 133.4, 125.6, 122.2, 120.5, 64.4, 34.3, 31.6, 30.8, 25.7, 24.7, 24.2, 23.1, 15.4.

HRMS (ESI+) (*m/z*): [M+2Na<sup>+</sup>] calculated for C<sub>156</sub>H<sub>210</sub>O<sub>9</sub>S<sub>3</sub>, 1184.74607; found, 1184.75537.

$(\text{Na}^+)_3\text{A10}^{3-}$

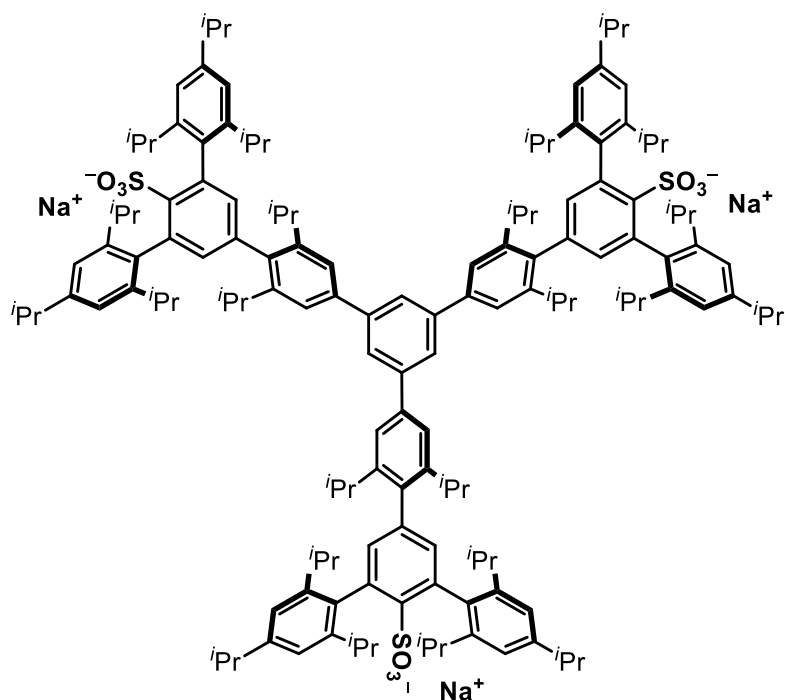

The reaction was performed in an N<sub>2</sub>-filled glovebox. **A10\_SO<sub>3</sub>Et** (55 mg, 0.024 mmol) was dissolved in THF (1 mL) and *t*BuOK (39.9 mg, 0.356 mmol, 15 equiv.) was added at room temperature. The reaction mixture was stirred for 18 h, then taken out of the glovebox, and 3 drops of water and CH<sub>2</sub>Cl<sub>2</sub> (2 mL) were added. The suspension was loaded directly on a silica gel column (10 g of silica gel) and purified by column chromatography (CH<sub>2</sub>Cl<sub>2</sub>, 1 CV; then 10% *i*PrOH in

CH<sub>2</sub>Cl<sub>2</sub>, 3 CV; then 20% *i*PrOH in CH<sub>2</sub>Cl<sub>2</sub>, 3 CV), the collected fractions were washed with NaOH (5% aq. soln., 2 x 50 mL), dried over Na<sub>2</sub>SO<sub>4</sub>, filtered, and concentrated under reduced pressure to give the title compound as an off-white solid (30 mg, 55% yield).

<sup>1</sup>H NMR (400 MHz, CDCl<sub>3</sub>-MeOD) δ 7.65 (s, 3H), 7.38 (s, 6H), 6.95 (s, 6H), 6.93 (s, 12H), 2.81 (m, 24H), 1.23 (d, *J* = 6.8 Hz, 36H, overlapped), 1.22 (d, *J* = 6.8 Hz, 36H, overlapped), 1.09 (d, *J* = 6.8 Hz, 36H), 1.01 (d, *J* = 6.9 Hz, 36H).

<sup>13</sup>C NMR (101 MHz, CDCl<sub>3</sub>-MeOD) δ 147.8, 147.2, 146.8, 143.4, 141.2, 140.9, 140.8, 140.1, 138.1, 137.7, 132.9, 125.7, 122.2, 120.1, 78.0, 77.7, 77.4, 34.5, 31.5, 25.7, 24.9, 24.2, 23.2.

HRMS (ESI-) (*m/z*): [M-3Na<sup>+</sup>] calculated for C<sub>150</sub>H<sub>195</sub>O<sub>9</sub>S<sub>3</sub>, 745.46599; found, 745.46581.



## 2.8 Synthesis and characterization of the ion pairs

### A general procedure for ion pair formation

A solution of the cation  $\text{BF}_4^-$  salt (1 equiv.) in  $\text{CH}_2\text{Cl}_2$  (1.5 mL) was added to a solution of the anion  $\text{Na}^+$  salt (1 equiv.; or 2 equiv. for **7-9**) in  $\text{CH}_2\text{Cl}_2$  (1 mL) under air at room temperature. After 10 min at room temperature (with occasional swirling of the solution), the solvent was removed under reduced pressure and the residue was re-dissolved in  $\text{CDCl}_3$  (0.6 mL). The ratio of both components was confirmed by  $^1\text{H}$  NMR analysis and the amounts were adjusted if necessary. Then, the NMR sample was diluted with  $\text{CH}_2\text{Cl}_2$  (5 mL),  $\text{H}_2\text{O}$  (5 mL) was added, and the mixture was stirred for 10 min. After that, the layers were separated, the organic layer was washed with  $\text{H}_2\text{O}$  (2 x 5 mL), filtered through a  $\text{CH}_2\text{Cl}_2$ -soaked filter paper, the solvent was removed under reduced pressure, and the product was dried under vacuum.

### **C2<sup>+</sup>A4<sup>-</sup>**

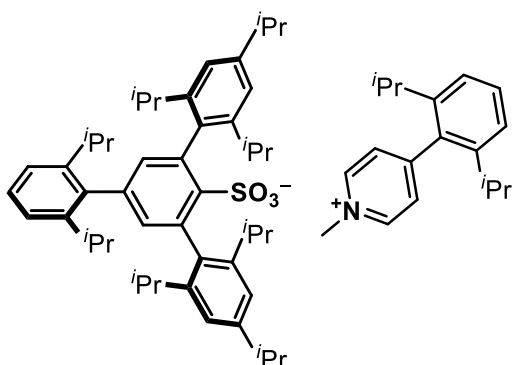

Prepared following the general procedure from **C2<sup>+</sup>BF<sub>4</sub><sup>-</sup>** (3 mg, 0.0088 mmol) and **Na<sup>+</sup>A4<sup>-</sup>** (6.55 mg, 0.0088 mmol). The ion pair was obtained as a yellowish crystalline solid (7.1 mg, 83%). Single crystals of **C2<sup>+</sup>A4<sup>-</sup>** were obtained by slow diffusion of hexane into a solution of the ion pair in chlorobenzene (0.2 mL) at room temperature.

$^1\text{H}$  NMR (500 MHz,  $\text{C}_6\text{D}_6$ )  $\delta$  8.59 (d,  $J = 6.0$  Hz, 2H), 7.30 (t,  $J = 7.7$  Hz, 1H), 7.26 (d,  $J = 5.9$  Hz, 2H), 7.22 (t,  $J = 7.7$  Hz, 1H), 7.18 (d, 2H), 7.12 (s, 4H), 7.07 (d,  $J = 7.8$  Hz, 2H), 7.04 (s, 2H), 4.20 (s, 3H), 3.27 (hept,  $J = 7.1$  Hz, 4H), 3.08 (hept,  $J = 7.0$  Hz, 2H), 2.75 (hept,  $J = 7.0$  Hz, 2H), 2.24 (hept,  $J = 7.0$  Hz, 2H), 1.50 (d,  $J = 6.6$  Hz, 12H), 1.24 (d,  $J = 6.8$  Hz, 12H), 1.19 (d,  $J = 6.7$  Hz, 12H), 1.14 (d,  $J = 6.8$  Hz, 12H), 1.04 (d,  $J = 6.7$  Hz, 12H).

$^{13}\text{C}$  NMR (126 MHz,  $\text{C}_6\text{D}_6$ )  $\delta$  157.4, 147.5, 147.1, 147.0, 146.2, 145.7, 144.2, 140.4, 140.0, 139.7, 138.7, 134.4, 132.5, 130.3, 123.5, 122.8, 119.7, 48.1, 34.7, 31.7, 30.8, 30.6, 26.0, 25.0, 24.5, 24.3, 24.0.

### C4<sup>+</sup>A2<sup>-</sup>

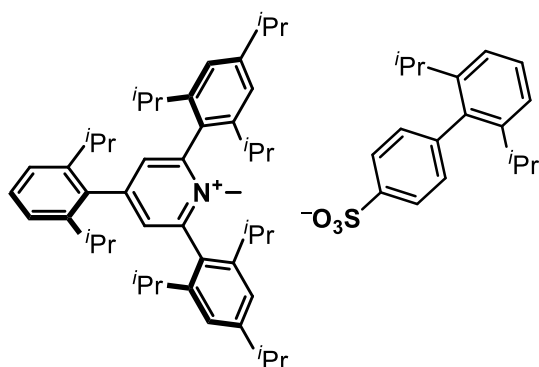

Prepared following the general procedure from **C4<sup>+</sup>BF<sub>4</sub><sup>-</sup>** (3 mg, 0.0088 mmol) and **Na<sup>+</sup>A2<sup>-</sup>** (3.9 mg, 0.0088 mmol). The ion pair was obtained as a yellowish crystalline solid (7.1 mg, 83%). Single crystals of **C4<sup>+</sup>A2<sup>-</sup>** were obtained by slow evaporation of a solution in Et<sub>2</sub>O/hexanes/p-xylene at room temperature.

<sup>1</sup>H NMR (500 MHz, C<sub>6</sub>D<sub>6</sub>/CDCl<sub>3</sub> 9:1) δ 8.01 (d, *J* = 8.0 Hz, 2H), 7.23 (t, *J* = 7.8 Hz, 2H), 7.12 (d, *J* = 7.7 Hz, 2H), 7.09 (s, 2H), 7.07

(d, *J* = 7.9 Hz, 2H), 7.02 (d, *J* = 7.9 Hz, 2H), 3.93 (s, 3H), 2.86 (hept, *J* = 7.0 Hz, 2H), 2.74 (hept, *J* = 6.9 Hz, 2H), 2.23 (hept, *J* = 6.9 Hz, 2H), 2.07 (hept, *J* = 6.8 Hz, 4H), 1.31 (d, *J* = 6.8 Hz, 12H), 1.25 (d, *J* = 6.8 Hz, 12H), 1.05 (d, *J* = 6.8 Hz, 12H), 1.01 (d, *J* = 6.7 Hz, 12H), 0.97 (d, *J* = 6.8 Hz, 12H). One 4H singlet signal is likely overlapped with the residual solvent signal.

<sup>13</sup>C NMR (101 MHz, CDCl<sub>3</sub>) δ 159.9, 157.5, 154.3, 147.2, 146.0, 145.6, 144.9, 140.7, 140.0, 131.9, 131.1, 128.7, 127.6, 126.5, 125.4, 123.7, 123.1, 122.4, 43.8, 34.6, 32.8, 31.8, 30.0, 24.8, 24.3, 24.1, 23.9, 23.5.

### C3<sup>+</sup>A3<sup>-</sup>

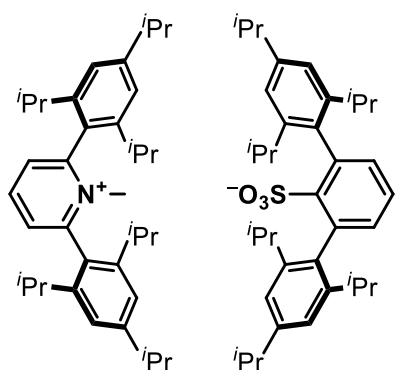

Prepared following the general procedure from **C3<sup>+</sup>BF<sub>4</sub><sup>-</sup>** (10 mg, 0.0171 mmol) and **Na<sup>+</sup>A3<sup>-</sup>** (10 mg, 0.0171 mmol). The ion pair was obtained as a colourless crystalline solid (17 mg, 94%). Single crystals of **C3<sup>+</sup>A3<sup>-</sup>** were obtained by slow evaporation of a solution in hexane at room temperature.

<sup>1</sup>H NMR (500 MHz, C<sub>6</sub>D<sub>6</sub>) δ 8.87 (t, *J* = 7.9 Hz, 1H), 7.86 (d, *J* = 7.9 Hz, 2H), 7.25 (s, 4H), 7.18 (d, *J* = 7.3 Hz, 2H), 7.09 (t, *J* = 7.5 Hz, 1H), 7.05 (s, 4H), 3.38 (hept, *J* = 6.9 Hz, 4H), 2.91 (hept, *J* = 6.9 Hz, 2H), 2.71 (hept, *J* = 6.9 Hz,

2H), 2.63 (s, 3H), 2.04 (hept, *J* = 6.9 Hz, 4H), 1.62 (d, *J* = 6.9 Hz, 12H), 1.30 (d, *J* = 6.9 Hz, 12H, overlapped), 1.29 (d, *J* = 6.9 Hz, 12H, overlapped), 1.16 (d, *J* = 6.9 Hz, 12H), 1.05 (d, *J* = 6.6 Hz, 12H), 0.94 (d, *J* = 6.9 Hz, 12H).

<sup>13</sup>C NMR (126 MHz, C<sub>6</sub>D<sub>6</sub>) δ 155.0, 152.7, 151.7, 147.2, 146.8, 146.7, 146.0, 141.1, 140.2, 131.5, 131.5, 127.4, 126.5, 122.3, 119.9, 41.6, 34.8, 34.7, 31.8, 31.7, 25.8, 24.9, 24.7, 24.0, 23.9, 23.3.

Additional NMR spectra available in section 3.1 NMR spectra: COSY, HSQC, HMBC, and ROESY in C<sub>6</sub>D<sub>6</sub>.

## 1 (C4<sup>+</sup>A3<sup>-</sup>)

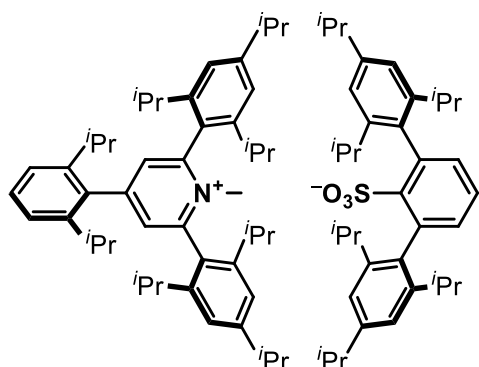

Prepared following the general procedure from **C4<sup>+</sup>BF<sub>4</sub><sup>-</sup>** (3 mg, 0.0088 mmol) and **Na<sup>+</sup>A3<sup>-</sup>** (6.55 mg, 0.0088 mmol). The ion pair was obtained as a yellowish crystalline solid (7.1 mg, 83%). Single crystals of **1** were obtained by slow evaporation of a solution in hexane at room temperature.

<sup>1</sup>H NMR (500 MHz, C<sub>6</sub>D<sub>6</sub>) δ 7.21 (s, 8H), 7.18 (t, *J* = 7.6 Hz, 1H), 7.09 (d, *J* = 7.0 Hz, 2H), 7.02 (t, *J* = 7.0 Hz, 1H), 6.99 (d, *J* = 7.9 Hz, 2H),

6.86 (s, 2H), 3.88 (s, 3H), 3.20 (hept, *J* = 6.8 Hz, 4H), 3.04 – 2.97 (m, 2H), 2.97 – 2.91 (m, 2H), 2.23 (hept, *J* = 6.9 Hz, 2H), 2.06 (hept, *J* = 6.8 Hz, 4H), 1.51 (d, *J* = 6.7 Hz, 12H), 1.43 (d, *J* = 7.0 Hz, 12H), 1.36 (d, *J* = 6.8 Hz, 12H), 1.32 (d, *J* = 6.8 Hz, 12H), 1.25 (d, *J* = 6.8 Hz, 12H), 0.99 (d, *J* = 6.8 Hz, 12H), 0.94 (d, *J* = 6.8 Hz, 12H).

<sup>13</sup>C NMR (126 MHz, C<sub>6</sub>D<sub>6</sub>) δ 157.9, 157.4, 153.3, 146.9, 145.8, 145.6, 145.2, 141.0, 140.0, 133.2, 131.3, 130.6, 130.4, 126.4, 126.2, 123.3, 122.8, 119.7, 46.3, 34.90, 34.87, 32.7, 31.5, 31.3, 25.7, 25.0, 24.8, 24.2, 24.1, 24.0, 23.6.

## 2 (C4<sup>+</sup>A4<sup>-</sup>)

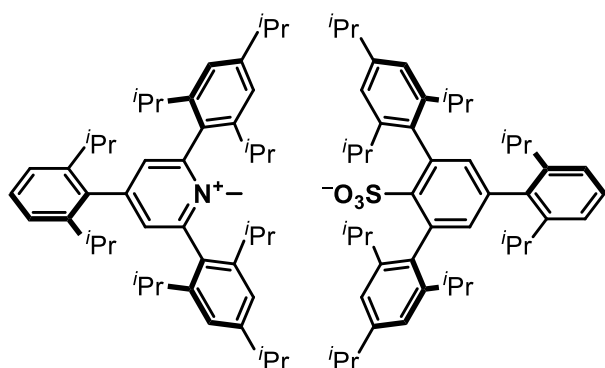

Prepared following the general procedure from **C4<sup>+</sup>BF<sub>4</sub><sup>-</sup>** (12.7 mg, 0.017 mmol) and **Na<sup>+</sup>A4<sup>-</sup>** (12.7 mg, 0.017 mmol). The ion pair was obtained as a yellowish crystalline solid (21 mg, 87%). Single crystals of **2** were obtained by slow evaporation of a solution in hexane at room temperature.

<sup>1</sup>H NMR (400 MHz, CDCl<sub>3</sub>) δ 7.81 (s, 2H), 7.48 (t, *J* = 7.8 Hz, 1H), 7.28 (d, *J* = 7.9 Hz, 2H), 7.23 (s, 4H), 7.18 (t, *J* = 7.5 Hz, 1H), 7.07 (d, *J* = 7.7 Hz, 2H), 6.91 (s, 4H), 6.85 (s, 2H), 3.70 (s, 3H), 3.06 – 2.80 (m, 10H), 2.44 (hept, *J* = 6.7 Hz, 2H), 2.17 (hept, *J* = 7.1 Hz, 4H), 1.33 – 1.27 (three overlapped doublets, 36H), 1.25 (d, *J* = 6.9 Hz, 12H), 1.21 (d, *J* = 6.7 Hz, 12H), 1.17 (d, *J* = 6.8 Hz, 12H), 1.05 (d, *J* = 6.8 Hz, 12H), 1.01 (d, *J* = 6.9 Hz, 12H).

<sup>13</sup>C NMR (101 MHz, CDCl<sub>3</sub>) δ 160.1, 157.5, 154.5, 147.2, 146.2, 145.6, 145.3, 144.8, 144.4, 139.6, 139.1, 139.0, 138.5, 131.9, 131.8, 131.2, 131.1, 127.3, 125.3, 123.7, 123.1, 122.1, 119.7, 43.5, 34.6, 34.0, 32.8, 31.8, 31.2, 30.1, 29.8, 25.7, 24.8, 24.8, 24.3, 24.1, 23.9, 23.8, 23.6.

### 3 (C5<sup>+</sup>A5<sup>-</sup>)

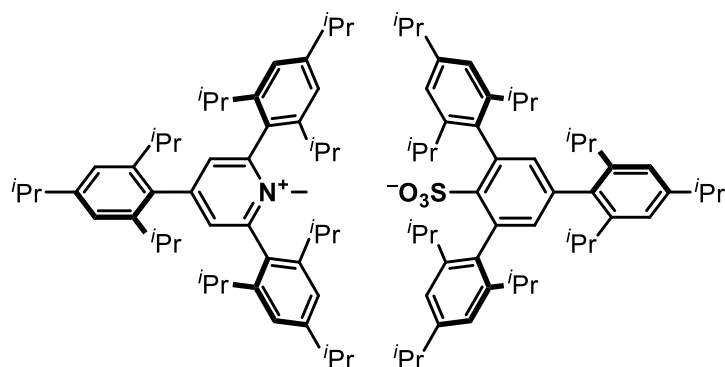

Prepared following the general procedure from **C5<sup>+</sup>BF<sub>4</sub><sup>-</sup>** (20 mg, 0.025 mmol) and **Na<sup>+</sup>A5<sup>-</sup>** (20 mg, 0.025 mmol). The ion pair was obtained as a yellowish crystalline solid (35 mg, 94%). Single crystals of **3** were obtained by a slow evaporation of a solution in hexane/benzene at room temperature.

<sup>1</sup>H NMR (500 MHz, C<sub>6</sub>D<sub>6</sub>) δ 7.22 (s, 4H), 7.19 (s, 4H), 7.14 (s, 2H), 7.04 (s, 2H), 6.97 (s, 2H), 6.86 (s, 2H), 3.94 (s, 3H), 3.27 (hept, *J* = 6.9 Hz, 4H), 3.16 (hept, *J* = 6.9 Hz, 2H), 3.06 – 2.92 (m, 4H), 2.87 (hept, *J* = 6.9 Hz, 1H), 2.77 (hept, *J* = 6.8 Hz, 1H), 2.26 (hept, *J* = 6.7 Hz, 2H), 2.04 (hept, *J* = 6.7 Hz, 4H), 1.53 (d, *J* = 6.7 Hz, 12H), 1.46 (d, *J* = 6.9 Hz, 12H), 1.37 (d, *J* = 6.8 Hz, 12H), 1.33 – 1.29 (m, 30H), 1.23 (d, *J* = 6.8 Hz, 12H), 1.21 (d, *J* = 6.9 Hz, 6H), 0.99 (d, *J* = 6.8 Hz, 12H), 0.97 (d, *J* = 6.7 Hz, 12H).

<sup>13</sup>C NMR (126 MHz, C<sub>6</sub>D<sub>6</sub>) δ 157.8, 157.6, 153.3, 151.2, 147.7, 147.3, 146.9, 145.7, 145.3, 145.3, 140.8, 139.7, 138.8, 137.3, 132.4, 131.1, 130.8, 126.5, 122.8, 121.2, 120.4, 119.5, 46.8, 34.9, 34.9, 34.9, 34.8, 32.8, 31.6, 31.4, 30.6, 26.0, 25.1, 24.9, 24.8, 24.5, 24.4, 24.2, 24.0, 23.6.

Additional NMR spectra available in section 3.1 NMR spectra: COSY, HSQC, HMBC, ROESY in C<sub>6</sub>D<sub>6</sub>; <sup>1</sup>H NMR, COSY, and ROESY in toluene-*d*<sub>8</sub>; <sup>1</sup>H NMR, COSY, and ROESY in DMSO-*d*<sub>6</sub>.

### 4 (C6<sup>+</sup>A6<sup>-</sup>)

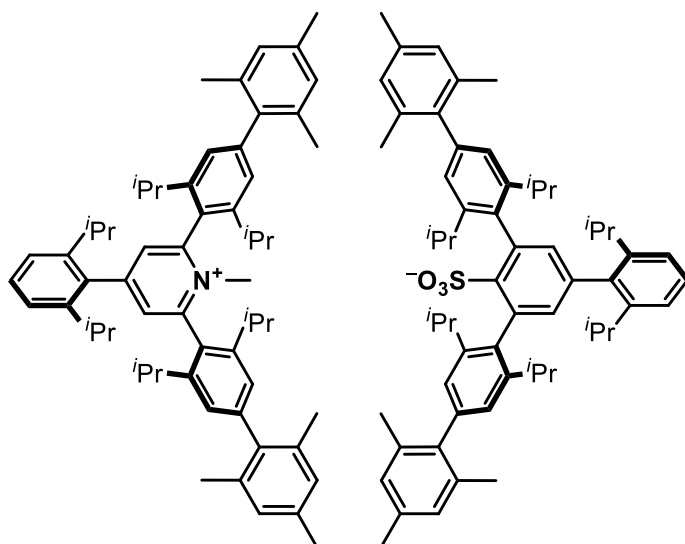

Prepared following the general procedure from **C6<sup>+</sup>BF<sub>4</sub><sup>-</sup>** (15.6 mg, 0.017 mmol) and **Na<sup>+</sup>A6<sup>-</sup>** (16 mg, 0.017 mmol). The ion pair was obtained as a yellowish crystalline solid (28.5 mg, 99%). Single crystals of **4** were obtained by slow evaporation of a solution in benzene/heptane at room temperature.

<sup>1</sup>H NMR (400 MHz, CDCl<sub>3</sub>) δ 8.02 (s, 2H), 7.51 (t, *J* = 7.9 Hz, 1H), 7.31 (d, *J* = 7.9 Hz, 2H), 7.27 (t, *J* = 7.6 Hz, 1H, overlapped), 7.24 (s, 4H), 7.15 (d, *J* = 7.6 Hz, 2H), 6.99 (s, 4H), 6.90 (s, 4H), 6.88 (s, 2H), 6.84 (s, 4H), 3.82 (s, 3H), 3.07 – 2.89 (m, 6H), 2.49 (hept, *J* =

6.9 Hz, 2H), 2.35 (s, 6H), 2.32 – 2.22 (m, 12H), 2.18 (s, 6H), 2.02 (s, 12H), 1.99 (s, 6H), 1.34 – 1.28 (two overlapped doublets, 24H), 1.25 – 1.19 (two overlapped doublets, 24H), 1.11 (d,  $J = 6.8$  Hz, 12H), 1.01 (d,  $J = 6.9$  Hz, 12H).

$^{13}\text{C}$  NMR (101 MHz,  $\text{CDCl}_3$ )  $\delta$  160.8, 157.3, 147.4, 146.6, 146.6, 146.0, 144.8, 141.3, 140.0, 139.6, 139.3, 138.2, 138.0, 137.7, 137.4, 137.4, 136.5, 135.5, 135.4, 135.3, 131.9, 131.7, 131.4, 131.3, 128.7, 128.7, 128.0, 127.7, 127.5, 126.4, 125.8, 123.8, 122.7, 122.5, 43.6, 32.9, 32.0, 31.2, 30.2, 25.6, 24.9, 24.8, 24.1, 23.8, 23.5, 21.6, 21.1, 21.0, 20.9, 20.9.

## 5 ( $\text{C7}^+\text{A7}^-$ )

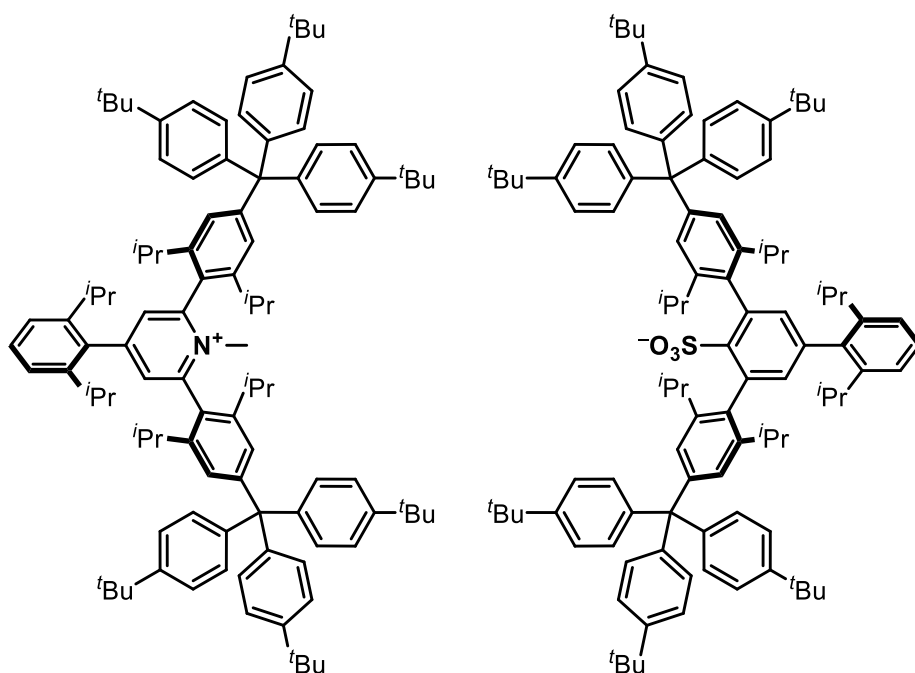

Prepared following the general procedure from  $\text{C7}^+\text{BF}_4^-$  (18.7 mg, 0.0126 mmol) and  $\text{Na}^+\text{A7}^-$  (18.7 mg, 0.0126 mmol). The ion pair was obtained as a yellowish crystalline solid (33.8 mg, 94%). Single crystals of **5** were obtained by slow evaporation of a solution in hexane at room temperature.

$^1\text{H}$  NMR (500 MHz,  $\text{CDCl}_3$ )  $\delta$  7.94 (s, 2H), 7.49 (t,  $J = 7.9$  Hz,

1H), 7.32 – 7.25 (m, 14H), 7.23 (s, 4H), 7.23 – 7.17 (m, 25H), 7.14 (d,  $J = 7.7$  Hz, 2H), 7.06 (d,  $J = 8.6$  Hz, 12H), 6.83 (s, 2H), 6.77 (s, 4H), 3.73 (s, 3H), 2.93 – 2.80 (m, 6H), 2.42 (hept,  $J = 6.8$  Hz, 2H), 2.14 (hept,  $J = 6.9$  Hz, 4H), 1.31 (s, 54H), 1.28 (s, 54H), 1.18 (d,  $J = 6.8$  Hz, 12H), 1.13 (d,  $J = 6.5$  Hz, 12H), 1.10 (d,  $J = 6.8$  Hz, 12H), 1.08 – 1.03 (two overlapped doublets, 24H), 0.81 (d,  $J = 6.9$  Hz, 12H).

$^{13}\text{C}$  NMR (126 MHz,  $\text{CDCl}_3$ )  $\delta$  160.9, 157.3, 153.4, 149.4, 147.7, 147.4, 145.1, 144.9, 144.7, 144.2, 142.8, 139.8, 139.4, 138.9, 138.5, 131.9, 131.6, 131.5, 131.3, 131.2, 130.6, 128.2, 127.5, 125.2, 124.8, 124.6, 123.9, 123.8, 122.5, 64.3, 64.1, 43.2, 34.5, 34.3, 32.7, 32.0, 31.6, 31.5, 31.1, 30.2, 29.8, 25.3, 24.8, 24.5, 24.0, 23.4, 23.3.

**6 (C7<sup>+</sup>A4<sup>-</sup>)**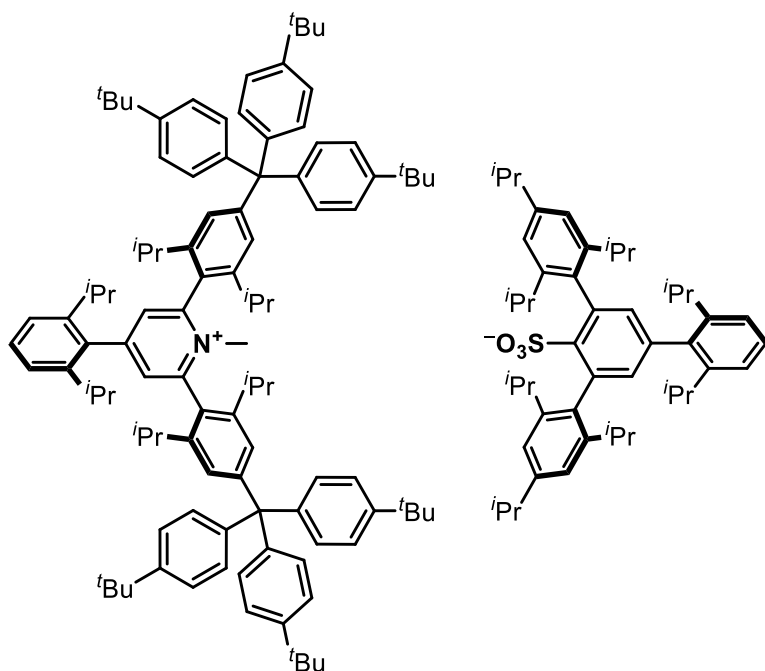

Prepared following the general procedure from **C7<sup>+</sup>BF<sub>4</sub><sup>-</sup>** (18.7 mg, 0.0126 mmol) and **Na<sup>+</sup>A4<sup>-</sup>** (9.4 mg, 0.0126 mmol). The ion pair was obtained as a yellowish crystalline solid (25.2 mg, 94%). Single crystals of **6** were obtained by leaving a solution in hot hexane at room temperature overnight.

<sup>1</sup>H NMR (400 MHz, CDCl<sub>3</sub>) δ 7.91 (s, 2H), 7.49 (t, *J* = 7.8 Hz, 1H), 7.31–7.26 (m, 14H), 7.21 (s, 4H), 7.18 (t, *J* = 7.7 Hz, 2H), 7.08–7.03 (m, 14H), 6.93 (s, 4H), 6.86 (s, 2H), 3.72 (s, 3H), 3.01–2.81 (m, 8H), 2.41 (hept, *J* = 6.8 Hz, 2H), 2.19–2.08 (m, 8H),

1.35 (d, *J* = 6.7 Hz, 12H), 1.31 (s, 54H), 1.26 (d, *J* = 6.9 Hz, 12H), 1.17 (d, *J* = 6.8 Hz, 12H), 1.09 (d, *J* = 6.8 Hz, 12H), 1.07–1.01 (three overlapped doublets, 36H).

<sup>13</sup>C NMR (101 MHz, CDCl<sub>3</sub>) δ 160.7, 157.3, 153.3, 149.4, 147.3, 146.3, 145.4, 144.7, 144.2, 142.8, 139.7, 139.2, 139.1, 138.5, 131.9, 131.7, 131.4, 131.2, 130.7, 128.2, 127.3, 124.8, 124.5, 123.8, 122.1, 119.7, 64.3, 43.3, 34.5, 34.1, 32.7, 31.9, 31.5, 31.2, 30.2, 29.8, 25.7, 24.8, 24.5, 24.3, 24.0, 23.8, 23.3.

## 7 (C8<sup>2+</sup>(A4<sup>-</sup>)<sub>2</sub>)

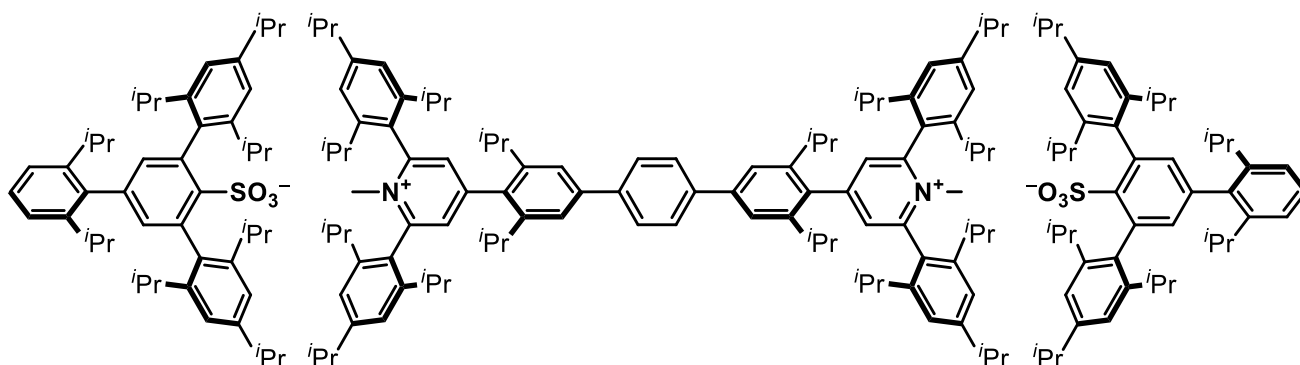

Prepared following a modified general procedure from **C8<sup>2+</sup>(BF<sub>4</sub><sup>-</sup>)<sub>2</sub>** (9.5 mg, 0.0061 mmol) and **Na<sup>+</sup>A4<sup>-</sup>** (9.05 mg, 0.0121 mmol) in the mixture of CH<sub>2</sub>Cl<sub>2</sub>/*i*PrOH 3:1. The ion pair was obtained as a yellowish crystalline solid (14.3 mg, 83%). Single crystals of **7** were obtained by slow evaporation of a solution in mesitylene/*n*-hexane/*n*-pentane/benzene.

<sup>1</sup>H NMR (500 MHz, C<sub>6</sub>D<sub>6</sub>/CDCl<sub>3</sub> 9:1) δ 7.75 (s, 4H), 7.54 (s, 4H), 7.22 (t, *J* = 7.7 Hz, 2H), 7.14 (s, 4H), 7.11 – 7.09 (m, 12H), 6.93 (s, 4H), 3.77 (s, 6H), 3.19 (hept, *J* = 6.9 Hz, 8H), 3.06 (hept, *J* = 6.4 Hz, 4H), 2.95 (hept, *J* = 14.1, 7.1 Hz, 4H), 2.88 (hept, *J* = 6.9 Hz, 4H), 2.35 (hept, *J* = 7.0 Hz, 4H), 2.06 (hept, *J* = 6.6 Hz, 8H), 1.45 (d, *J* = 6.7 Hz, 24H), 1.38 (d, *J* = 6.9 Hz, 24H), 1.28 (d, *J* = 6.9 Hz, 24H), 1.23 (d, *J* = 6.8 Hz, 24H, overlapped), 1.22 (d, *J* = 6.9 Hz, 24H, overlapped), 1.14 (d, *J* = 6.9 Hz, 24H), 1.09 (d, *J* = 6.8 Hz, 24H), 1.02 (d, *J* = 6.7 Hz, 24H). One signal (s, 8H) is overlapped with the residual solvent peak at 7.16 ppm.

<sup>13</sup>C NMR (126 MHz, C<sub>6</sub>D<sub>6</sub>/CDCl<sub>3</sub> 9:1) δ 158.0, 157.7, 153.7, 147.3, 146.8, 146.2, 146.0, 145.5, 143.3, 141.0, 140.4, 139.8, 139.4, 138.8, 132.4, 132.2, 131.0, 126.3, 123.0, 122.6, 122.4, 119.8, 77.4, 45.6, 34.8, 34.8, 32.8, 31.7, 31.6, 30.5, 30.2, 26.0, 25.1, 25.0, 24.8, 24.3, 24.2, 24.1, 23.7.

Additional NMR spectra available in section 3.1 NMR spectra: COSY, ROESY in C<sub>6</sub>D<sub>6</sub>/CDCl<sub>3</sub>.

## 8 (C9<sup>2+</sup>(A4<sup>-</sup>)<sub>2</sub>)

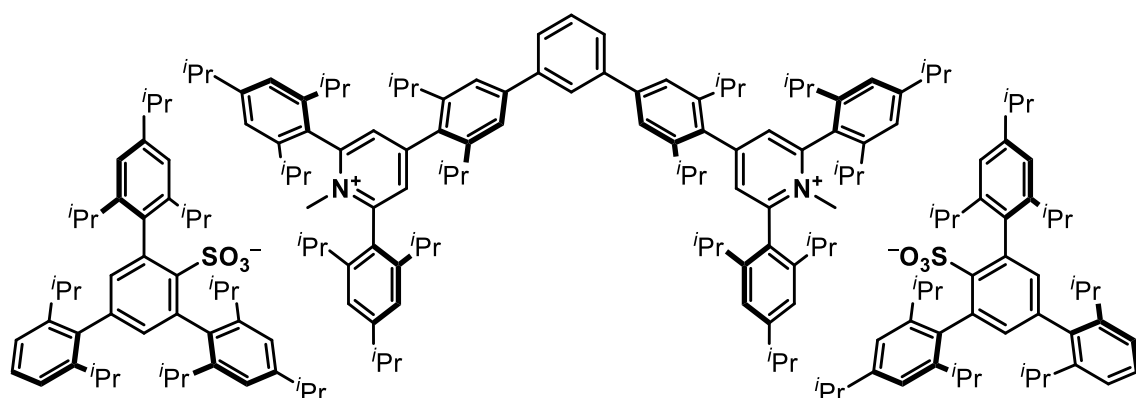

Prepared following the general procedure from **C9<sup>2+</sup>(BF<sub>4</sub><sup>-</sup>)<sub>2</sub>** (9.2 mg, 0.0059 mmol) and **Na<sup>+</sup>A4<sup>-</sup>** (8.8 mg, 0.0118 mmol). The ion pair was obtained as a yellowish crystalline solid (14.2 mg, 85%).

<sup>1</sup>H NMR (500 MHz, C<sub>6</sub>D<sub>6</sub>) δ 8.13 (t, *J* = 2.0 Hz, 1H), 7.70 (dd, *J* = 7.7, 1.8 Hz, 2H), 7.60 (s, 4H), 7.50 (t, *J* = 7.7 Hz, 1H), 7.28 (t, *J* = 7.7 Hz, 2H), 7.20 (s, 8H), 7.19 (s, 8H), 7.18 (s, 2H), 7.05 (s, 4H), 6.99 (s, 4H), 3.74 (s, 6H), 3.30 (hept, *J* = 6.8 Hz, 8H), 3.17 (hept, *J* = 6.8 Hz, 4H), 3.03 (hept, *J* = 6.9 Hz, 4H), 2.92 (hept, *J* = 6.8 Hz, 4H), 2.37 (hept, *J* = 6.8 Hz, 4H), 2.05 (hept, *J* = 6.8 Hz, 8H), 1.55 (d, *J* = 6.7 Hz, 24H), 1.46 (d, *J* = 6.9 Hz, 24H), 1.33 (d, *J* = 6.9 Hz, 48H), 1.27 (d, *J* = 6.8 Hz, 24H), 1.20 (d, *J* = 6.8 Hz, 24H), 1.07 (d, *J* = 6.7 Hz, 24H), 1.04 (d, *J* = 6.7 Hz, 24H).

<sup>13</sup>C NMR (126 MHz, C<sub>6</sub>D<sub>6</sub>) δ 157.8, 157.5, 153.4, 147.4, 146.8, 146.6, 146.4, 145.9, 145.7, 145.1, 143.7, 142.8, 140.9, 139.7, 139.7, 138.4, 132.8, 132.1, 130.8, 128.6, 127.2, 127.1, 126.3, 122.8, 122.6, 122.6, 119.4, 46.2, 34.9, 34.8, 32.8, 31.6, 31.6, -30.5, 26.0, 25.0, 24.9, 24.9, 24.5, 24.1, 24.0, 23.6.

Additional NMR spectra available in section 3.1 NMR spectra: COSY and ROESY in C<sub>6</sub>D<sub>6</sub>.



## 9 (C8<sup>2+</sup>(A9<sup>-</sup>)<sub>2</sub>)

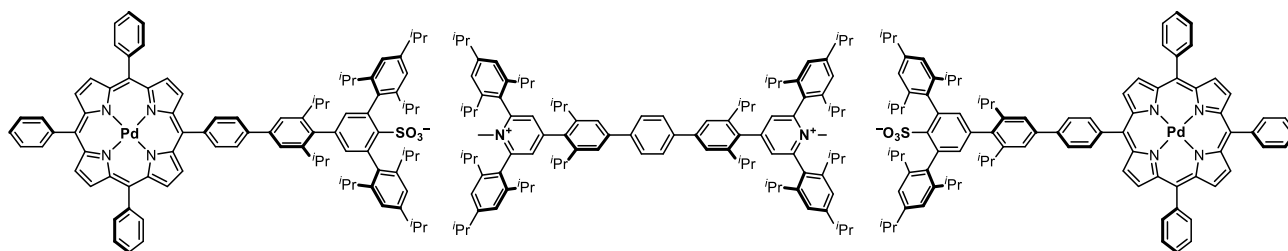

Prepared following the general procedure from **C8<sup>2+</sup>(BF<sub>4</sub><sup>-</sup>)<sub>2</sub>** (4.1 mg, 0.0026 mmol) and **Na<sup>+</sup>A9<sup>-</sup>** (7.7 mg, 0.0052 mmol). The ion pair was obtained as dark-red crystals (7.5 mg, 67%). Partial loss of around 20% of Pd was observed by <sup>1</sup>H NMR analysis. Single crystals of **9** were obtained from a solution in toluene/*n*-heptane at room temperature.

<sup>1</sup>H NMR (500 MHz, C<sub>6</sub>D<sub>6</sub>) δ 9.12 (d, *J* = 5.0 Hz, 4H), 8.98 (d, *J* = 4.9 Hz, 4H), 8.94 – 8.92 (m, 8H), 8.29 (d, *J* = 8.2 Hz, 4H<sup>free</sup>), 8.21 (d, *J* = 8.2 Hz, 4H<sup>Pd</sup>), 8.14 – 8.11 (m, 12H<sup>free</sup>), 8.07 – 8.02 (m, 16H<sup>Pd</sup> + 4H<sup>free</sup>), 7.88 (s, 4H<sup>free</sup>), 7.86 (s, 4H<sup>Pd</sup>), 7.84 (s, 4H), 7.63 (s, 4H), 7.49 – 7.36 (m, 18H), 7.27 (s, 8H), 7.25 (s, 8H), 7.17 (assigned as s, 4H, overlapped with the residual solvent signal), 7.08 (s, 4H), 3.83 (s, 6H), 3.43 – 3.33 (m, 12H), 3.06 (hept, *J* = 6.9 Hz, 4H), 2.96 (hept, *J* = 6.9 Hz, 4H), 2.41 (hept, *J* = 6.7 Hz, 4H), 2.13 – 2.06 (m, 8H, overlapped with a signal from residual toluene), 1.62 (d, *J* = 6.6 Hz, 24H), 1.50 (d, *J* = 6.8 Hz, 24H), 1.43 (d, *J* = 6.9 Hz, 24H), 1.41 – 1.34 (two overlapped doublets, 48H, overlapped with residual heptane), 1.31 (d, *J* = 6.8 Hz, 24H), 1.12 (d, *J* = 6.8 Hz, 24H), 1.08 (d, *J* = 6.8 Hz, 24H), -2.06 (s, 2H<sup>free</sup>, N-H). The signals from the product and the side-product in which Pd is not present in the porphyrin are marked as H<sup>Pd</sup> and H<sup>free</sup>, respectively, where separable.

<sup>13</sup>C NMR (126 MHz, C<sub>6</sub>D<sub>6</sub>) δ 158.1, 157.3, 153.6, 148.3, 147.0, 146.3, 145.9, 143.2, 143.0, 142.53, 142.46, 142.42, 142.36, 142.3, 140.0, 137.9, 135.6, 135.2, 135.0, 134.5, 132.8, 132.5, 131.8, 131.6, 131.5, 130.8, 129.3, 128.6, 127.5, 127.0, 126.4, 126.0, 125.7, 122.9, 122.6, 122.5, 122.4, 122.3, 122.0, 119.8, 53.3, 35.7, 34.9, 34.9, 32.9, 32.3, 31.7, 26.1, 25.1, 25.0, 24.8, 24.4, 24.2, 24.1, 23.7. Contains signals belonging to residual heptane and toluene.

## 10 (C10<sup>3+</sup>A10<sup>3-</sup>)

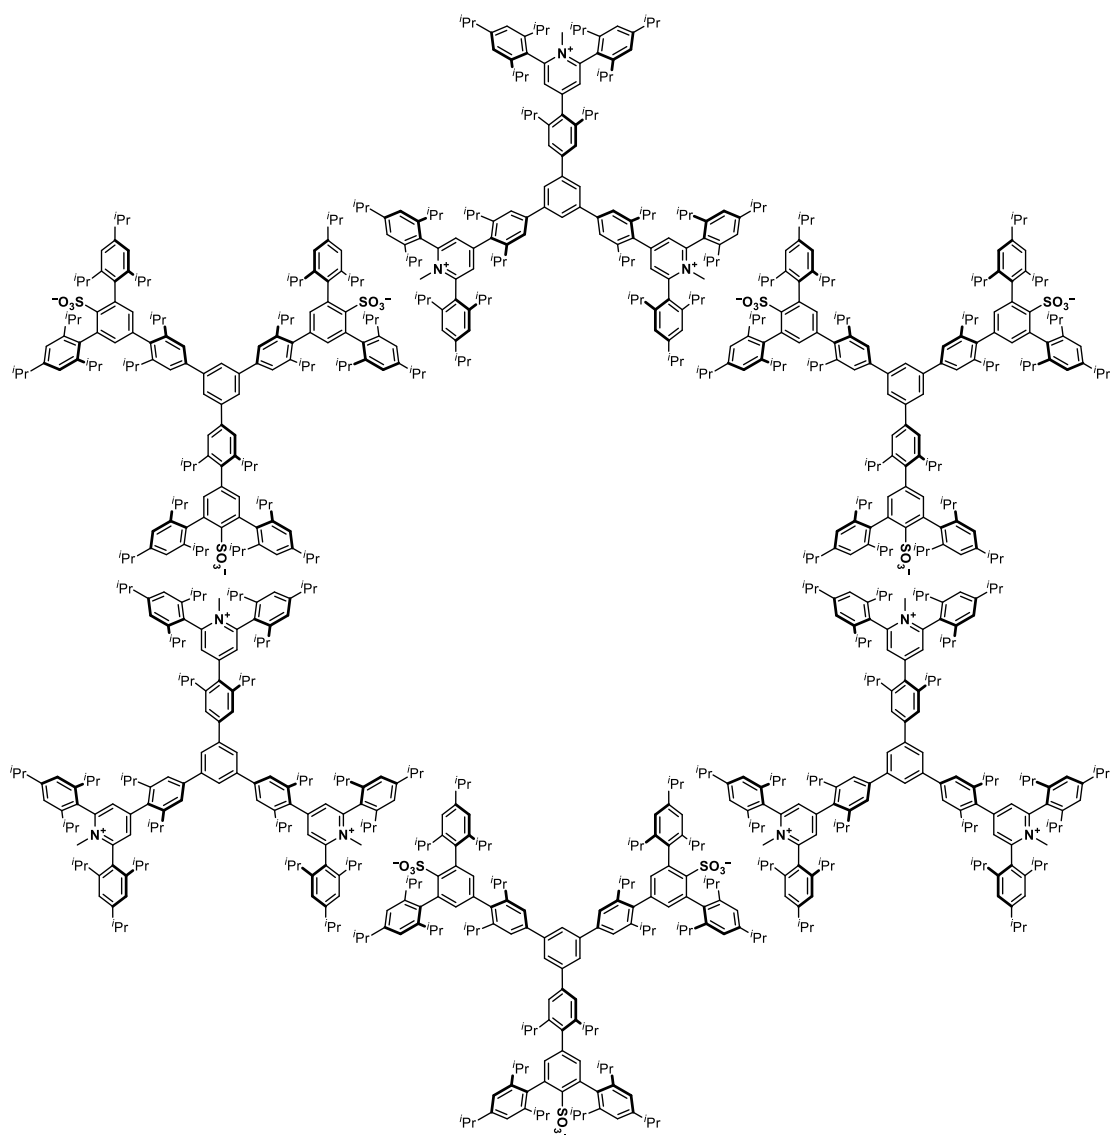

Prepared following a modified general procedure from **C10<sup>3+</sup>(BF<sub>4</sub><sup>-</sup>)<sub>3</sub>** (9 mg, 0.0039 mmol) and **(Na<sup>+</sup>)<sub>3</sub>A10<sup>3-</sup>** (9 mg, 0.0039 mmol) in CH<sub>2</sub>Cl<sub>2</sub>/*i*PrOH 4:1 (5 mL). The ion pair was obtained as an off-white solid (15 mg, 90%). Single crystals of **10** were obtained by slow evaporation of a solution in CH<sub>2</sub>Cl<sub>2</sub>/PhCF<sub>3</sub>.

<sup>1</sup>H NMR (500 MHz, MeOD-CDCl<sub>3</sub>) δ 7.89 (s, 6H), 7.63 (s, 3H), 7.62 (s, 3H), 7.50 (s, 6H), 7.34 (s, 6H), 7.25 (s, 12H), 6.89 (s, 18H), 3.68 (s, 9H), 2.98 (hept, *J* = 6.9 Hz, 6H), 2.82 (m, 24H), 2.54 (hept, *J* = 6.6 Hz, 6H), 2.16 (hept, *J* = 6.6 Hz, 12H), 1.29 – 1.26 (m, *J* = 6.5 Hz, 72H), 1.23 – 1.18 (m, 144H), 1.04 (d, *J* = 6.8 Hz, 36H), 0.96 (d, *J* = 6.9 Hz, 36H). Contains residual *i*PrOH.

<sup>13</sup>C NMR (126 MHz, MeOD-CDCl<sub>3</sub>) δ 159.7, 157.8, 154.8, 147.7, 147.6, 146.6, 146.5, 146.1, 145.7, 143.9, 143.3, 142.7, 141.7, 141.1, 140.0, 138.2, 137.8, 132.5, 131.9, 131.4, 126.3, 125.5, 125.3, 123.2, 123.1, 122.0, 119.9, 64.1, 43.5, 34.7, 34.4, 33.0, 32.0, 31.3, 30.5, 25.6, 24.9, 24.8, 24.2, 24.1, 23.9, 23.4, 23.2. Contains residual *i*PrOH.

## 2.9 Analysis of the directionality of the ionic bonds in solution

### 2.9.1 Analysis of $C3^+A3^-$ by ROESY

$^1H$  NMR ( $C_6D_6$ ) spectrum of  $C3^+A3^-$  with assignments:

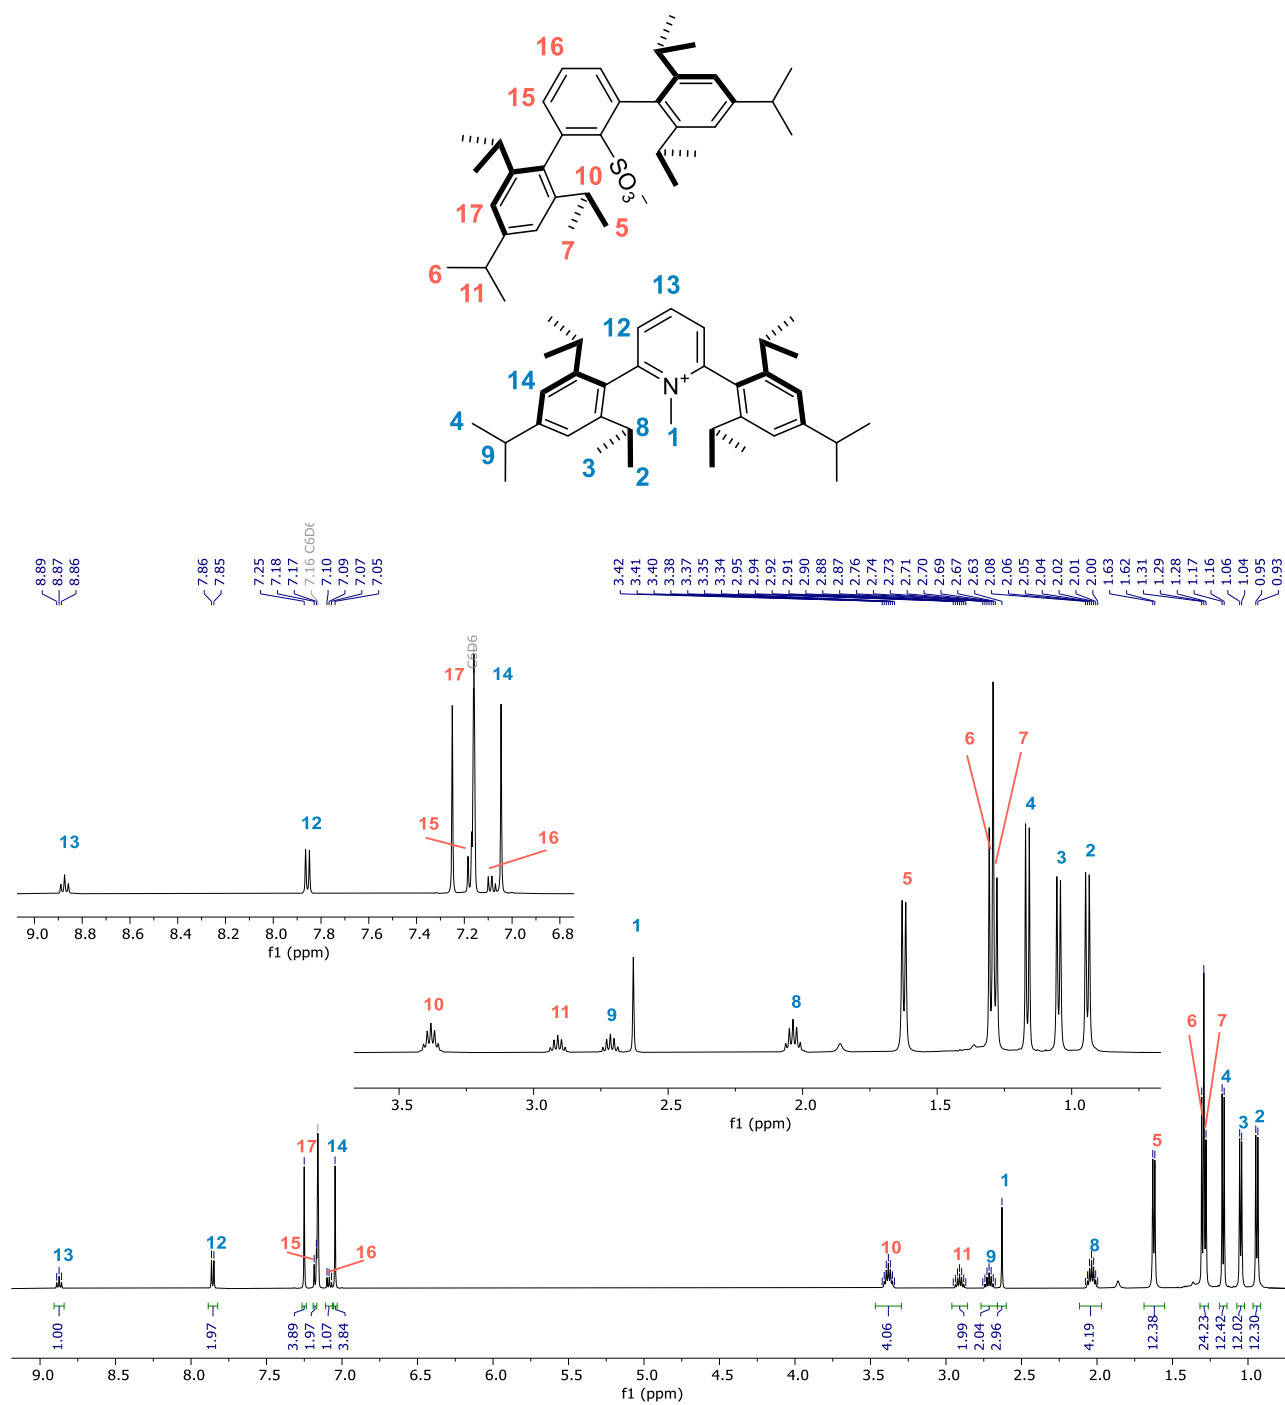

Excerpts from the  $^1\text{H}$ - $^1\text{H}$  ROESY NMR spectrum of  $\text{C3}^+\text{A3}^-$  in  $\text{C}_6\text{D}_6$ :

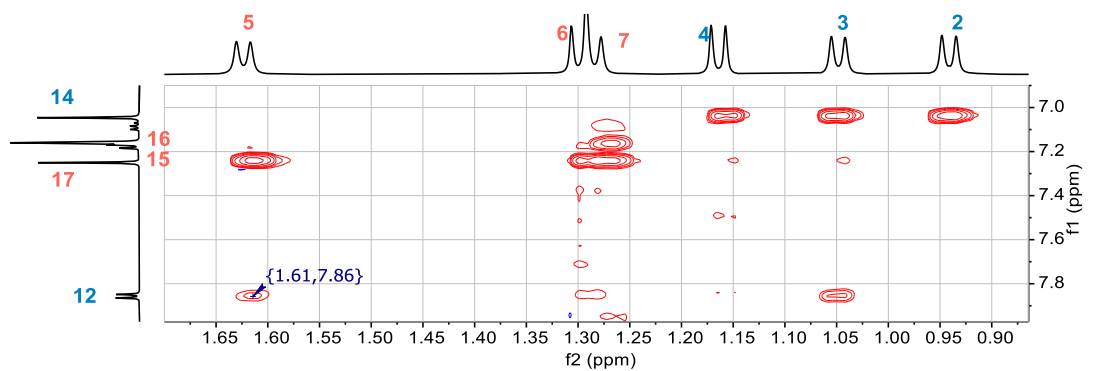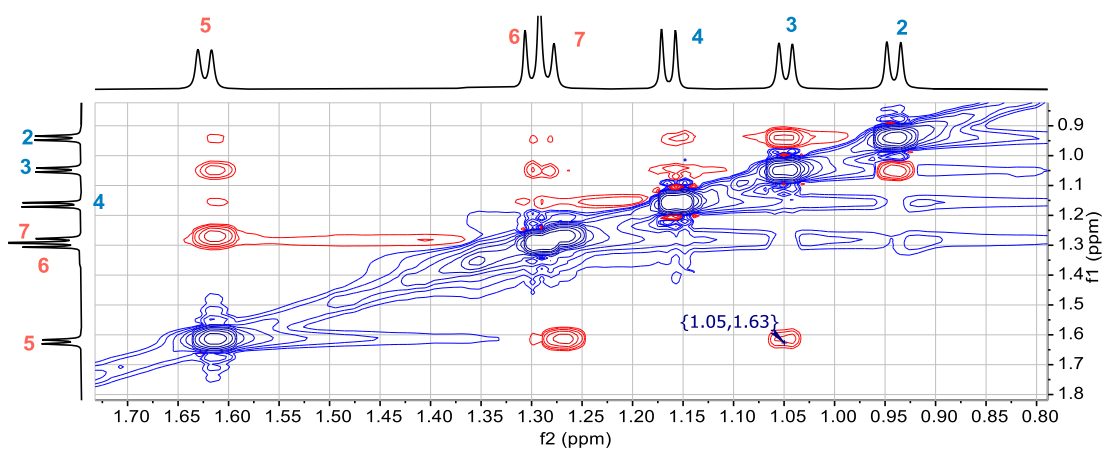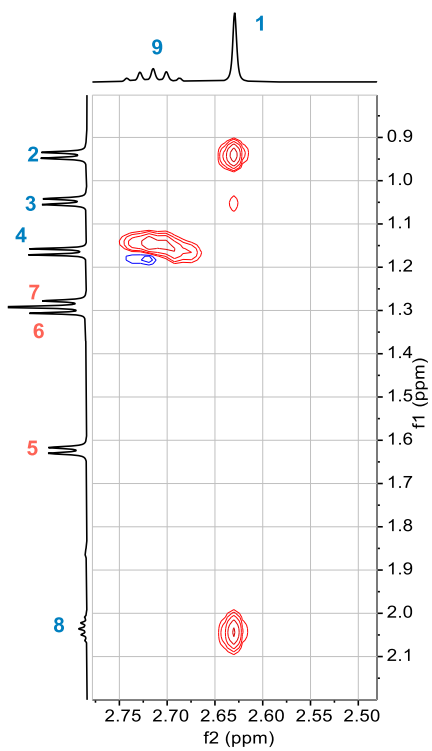

a

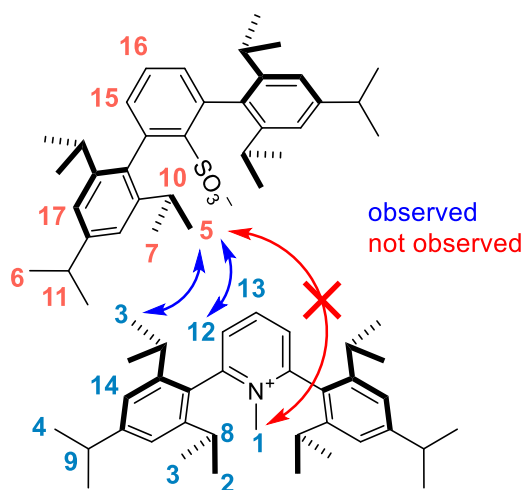

Comparison of the directionality in **C3<sup>+</sup>A3<sup>-</sup>** in solution in C<sub>6</sub>D<sub>6</sub> and in the solid-state:

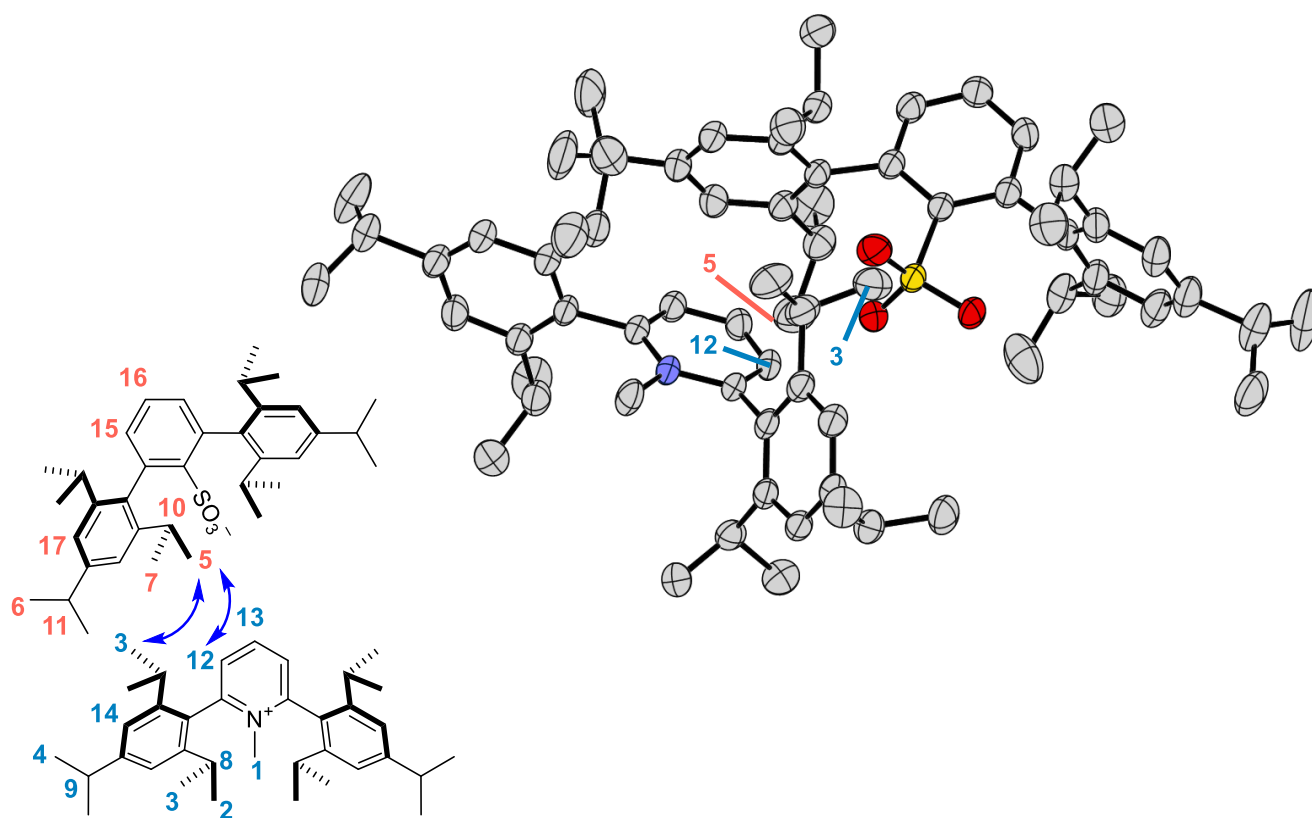

## 2.9.2 Analysis of **3** by ROESY

$^1\text{H}$  NMR ( $\text{C}_6\text{D}_6$ ) spectrum of **3** with assignments:

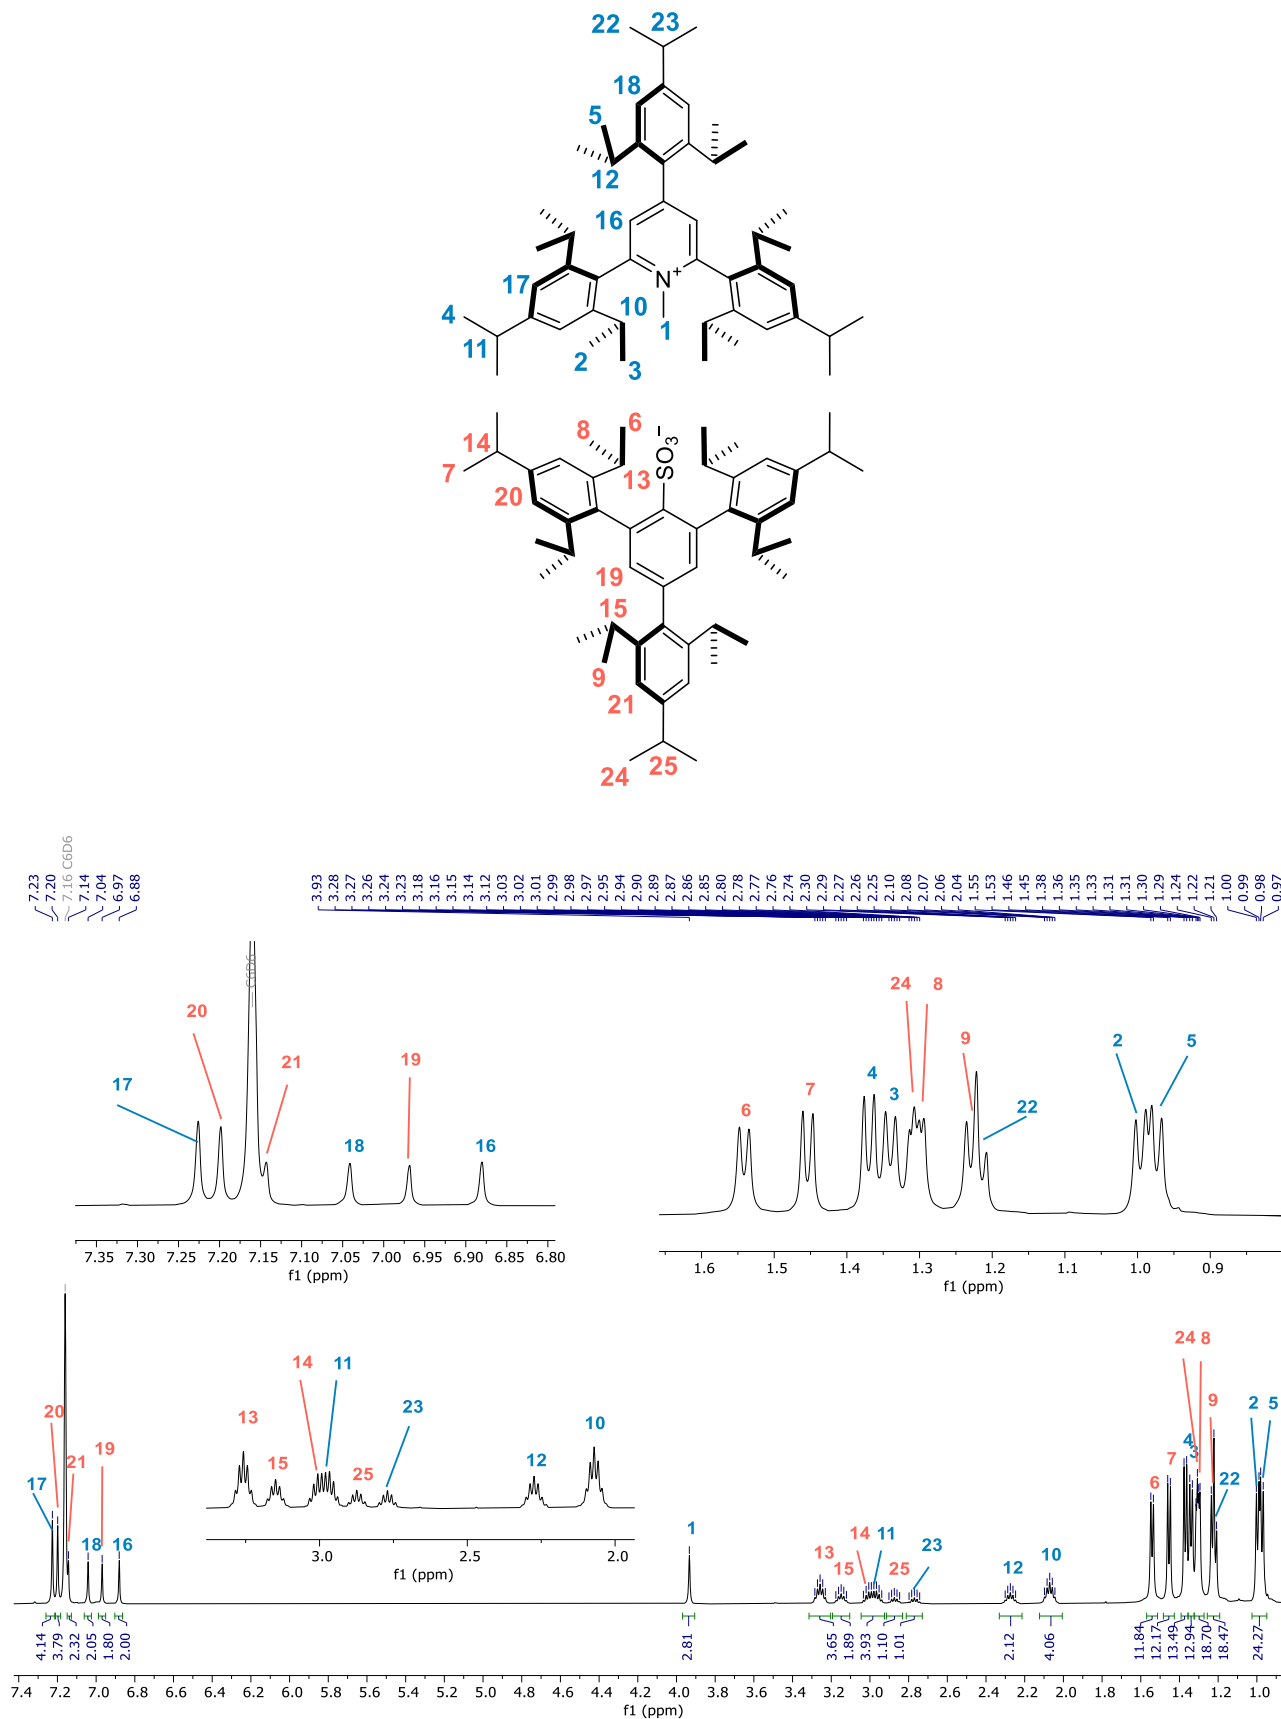

Excerpts from the  $^1\text{H}$ - $^1\text{H}$  ROESY NMR spectrum of **3** in  $\text{C}_6\text{D}_6$ :

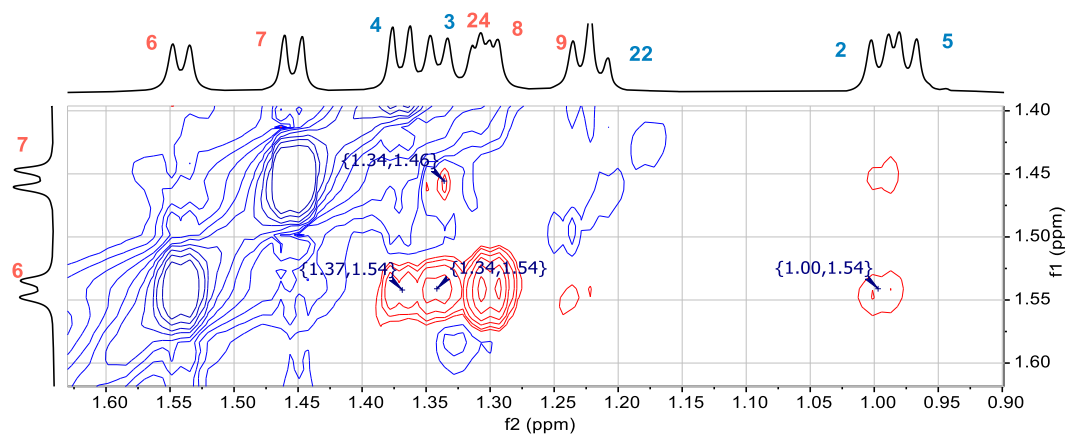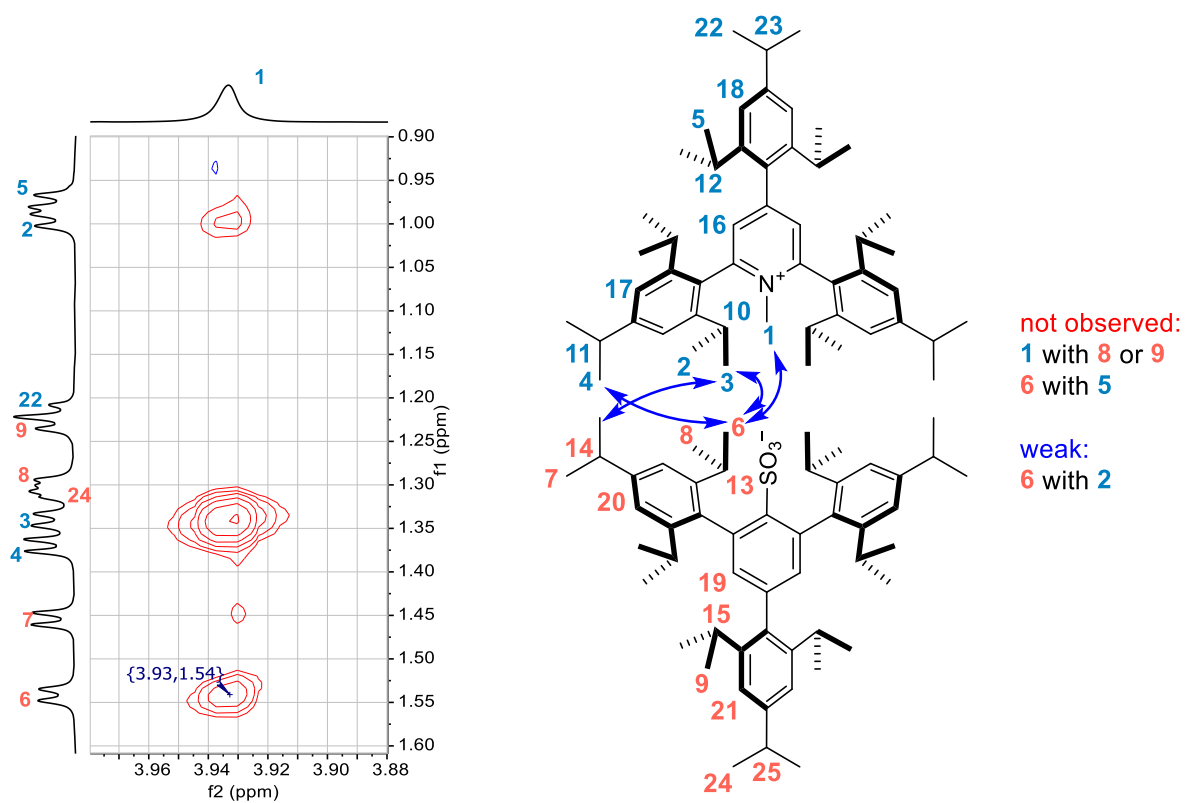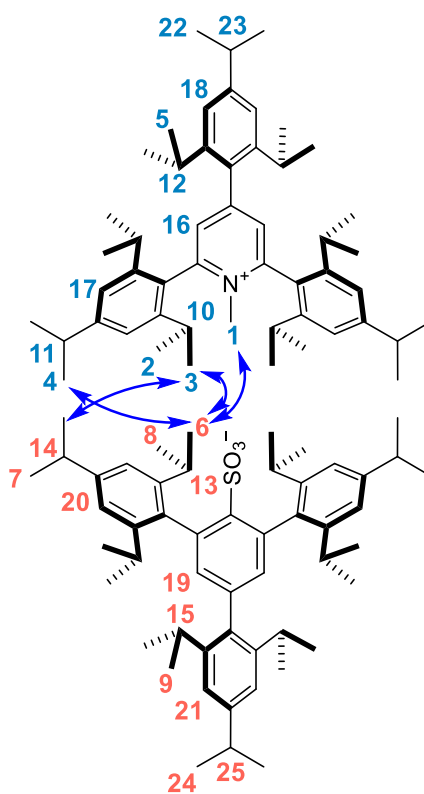

not observed:

1 with 8 or 9

6 with 5

weak:

6 with 2

Comparison of the directionality in **3** in solution in C<sub>6</sub>D<sub>6</sub> and in the solid-state:

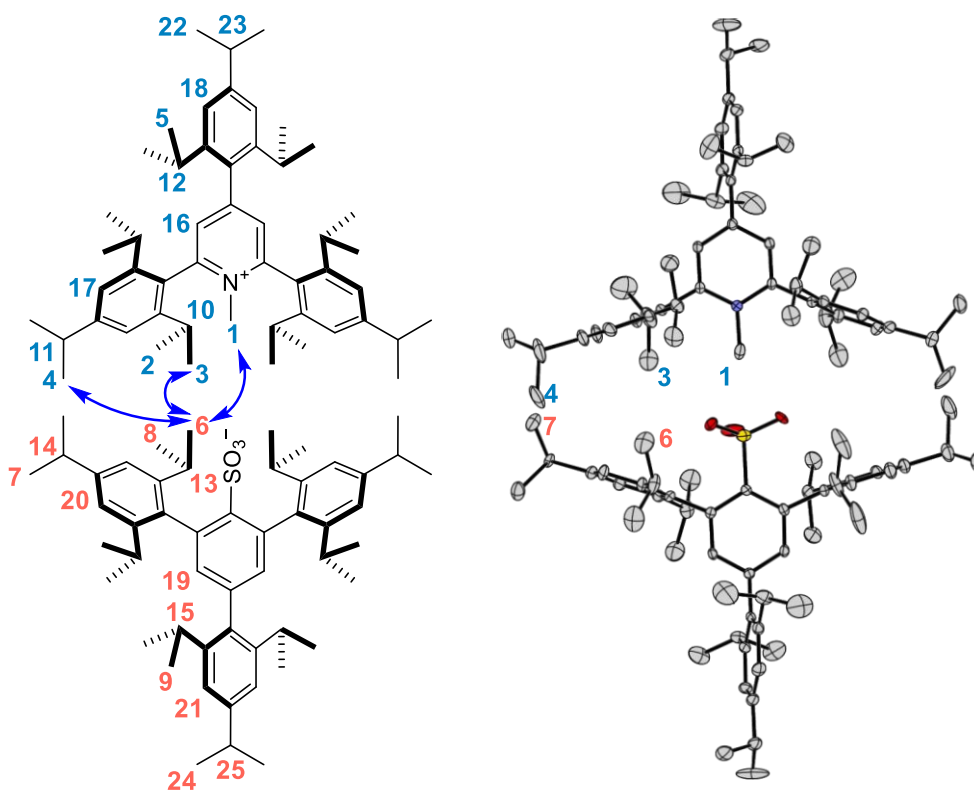

Selected ROE correlations and the corresponding distances, calculated from the integral intensities in **3** in C<sub>6</sub>D<sub>6</sub>:

| Correlation | F1, ppm | F2, ppm | Distance, Å | Closest distance in X-ray, Å |
|-------------|---------|---------|-------------|------------------------------|
| <b>1-3*</b> | 1.34    | 3.93    | 2.57        | 2.57                         |
| <b>1-6</b>  | 1.54    | 3.93    | 3.47        | 2.68                         |
| <b>2-6</b>  | 0.99    | 1.53    | 3.30        | 5.28                         |
| <b>2-7</b>  | 0.99    | 1.45    | 3.45        | 3.71                         |
| <b>3-6</b>  | 1.34    | 1.54    | 2.35        | 2.96                         |
| <b>4-6</b>  | 1.37    | 1.54    | 2.64        | 2.23                         |
| <b>3-7</b>  | 1.34    | 1.45    | 3.38        | 2.50                         |
| <b>6-17</b> | 1.54    | 7.24    | 3.02        | 3.88                         |
| <b>7-17</b> | 1.45    | 7.24    | 3.34        | 2.65                         |
| <b>6-22</b> | 1.54    | 1.22    | —           | 12.39                        |

\*The distance between the two closest protons was taken from the crystal structure of **3** and used as a reference.



| <i>Correlation</i> | F1, ppm | F2, ppm | Distance, Å | Closest distance in X-ray, Å |
|--------------------|---------|---------|-------------|------------------------------|
| <b>1-10*</b>       | 3.93    | 2.07    | 2.42        | 2.42                         |
| <b>1-6</b>         | 1.54    | 3.93    | 3.25        | 2.68                         |
| <b>2-6</b>         | 0.99    | 1.53    | 3.22        | 5.28                         |
| <b>2-7</b>         | 0.99    | 1.45    | 3.37        | 3.71                         |
| <b>3-6</b>         | 1.34    | 1.54    | 2.28        | 2.96                         |
| <b>4-6</b>         | 1.37    | 1.54    | 2.55        | 2.23                         |
| <b>3-7</b>         | 1.34    | 1.45    | 3.28        | 2.50                         |
| <b>6-17</b>        | 1.54    | 7.24    | 2.96        | 3.88                         |
| <b>7-17</b>        | 1.45    | 7.24    | 3.27        | 2.65                         |
| <b>6-22</b>        | 1.54    | 1.22    | –           | 12.39                        |

\*The distance between the two closest protons was taken from the crystal structure of **3** and used as a reference.

| <i>Correlation</i> | F1, ppm | F2, ppm | Distance, Å | Closest distance in X-ray, Å |
|--------------------|---------|---------|-------------|------------------------------|
| <b>10-12*</b>      | 2.07    | 2.27    | 2.95        | 2.95                         |
| <b>1-6</b>         | 1.54    | 3.93    | 3.70        | 2.68                         |
| <b>2-6</b>         | 0.99    | 1.53    | 3.67        | 5.28                         |
| <b>2-7</b>         | 0.99    | 1.45    | 3.83        | 3.71                         |
| <b>3-6</b>         | 1.34    | 1.54    | 2.59        | 2.96                         |
| <b>4-6</b>         | 1.37    | 1.54    | 2.90        | 2.23                         |
| <b>3-7</b>         | 1.34    | 1.45    | 3.72        | 2.50                         |
| <b>6-17</b>        | 1.54    | 7.24    | 3.37        | 3.88                         |
| <b>7-17</b>        | 1.45    | 7.24    | 3.72        | 2.65                         |
| <b>6-22</b>        | 1.54    | 1.22    | –           | 12.39                        |

\*The distance between the two closest protons was taken from the crystal structure of **3** and used as a reference.

$^1\text{H}$  NMR (toluene- $d_8$ ) spectrum of **3** with assignments:

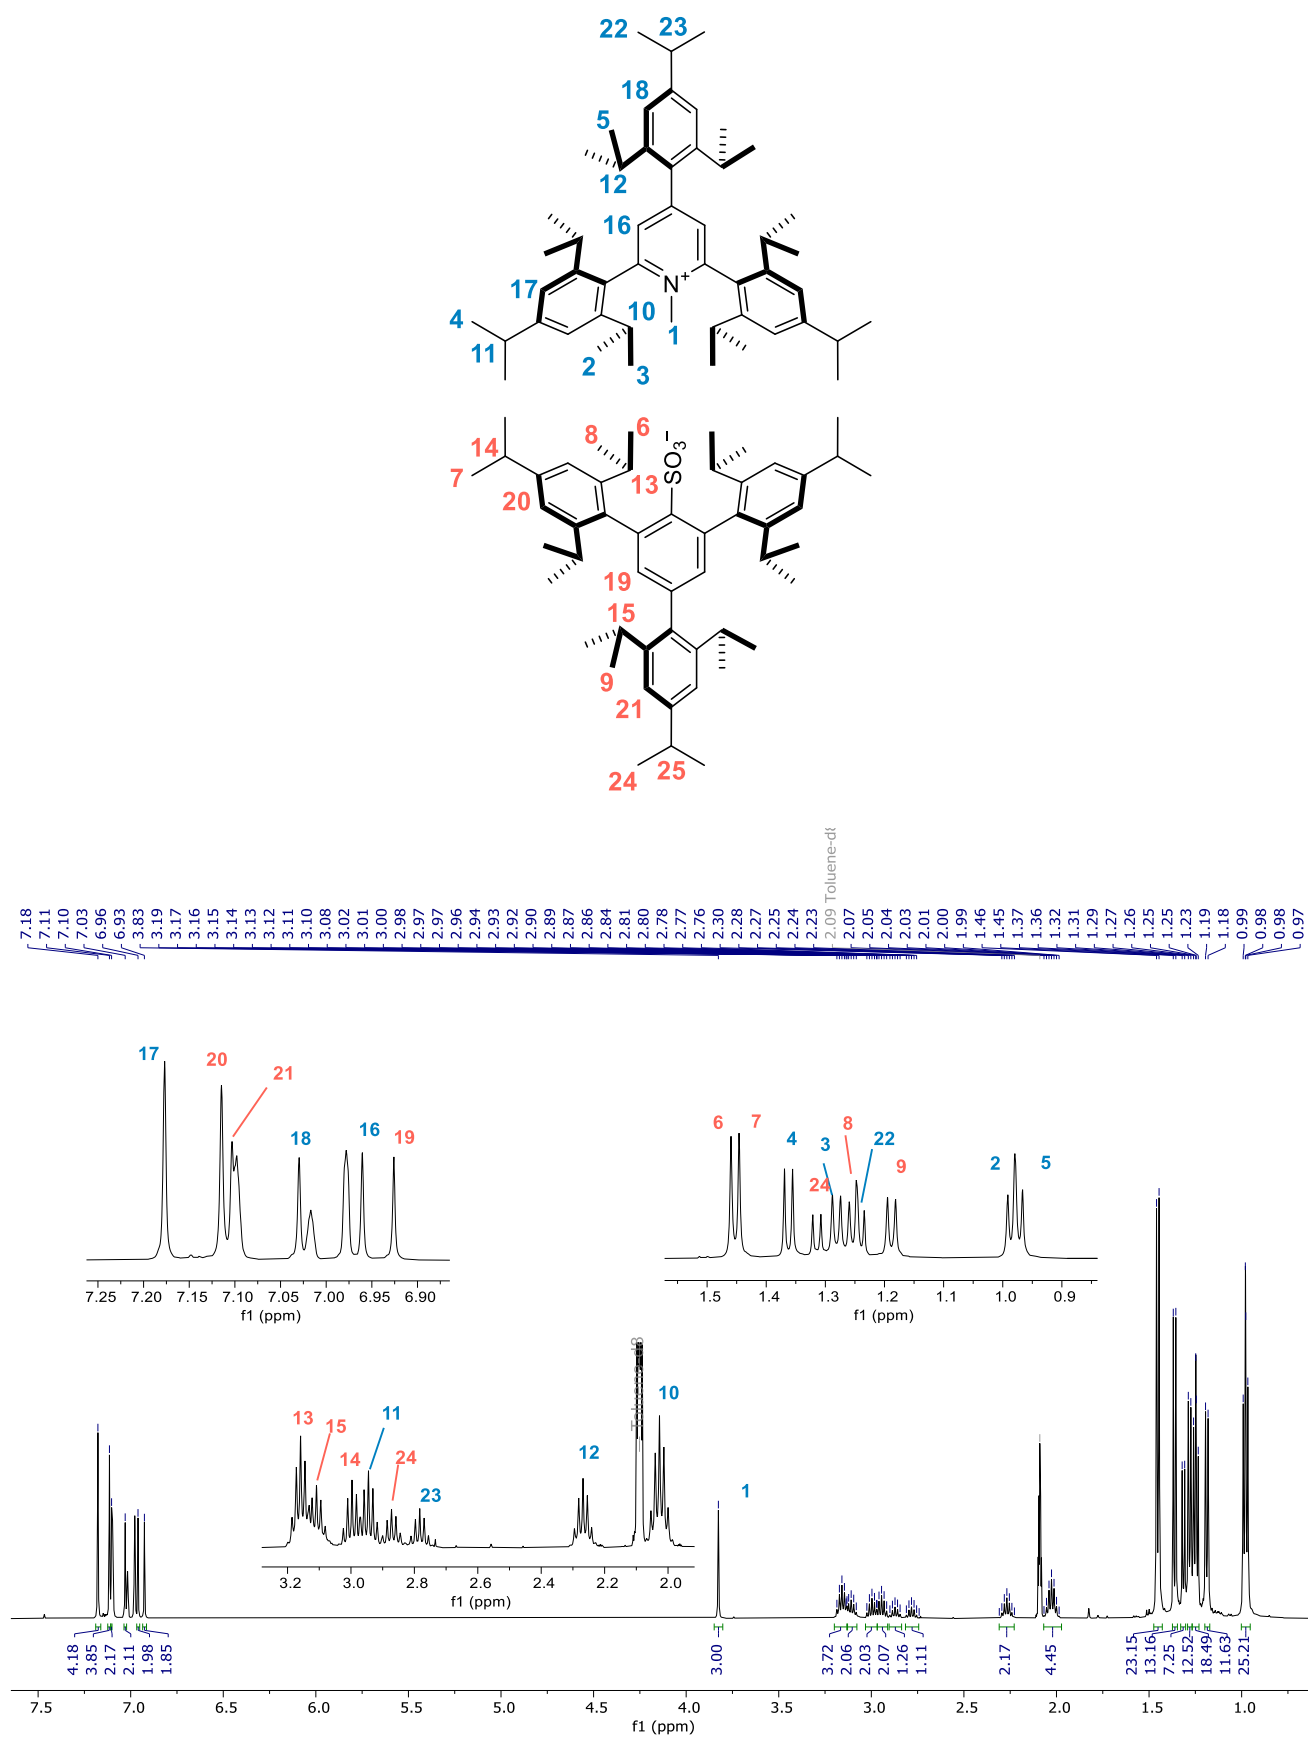

Excerpts from the  $^1\text{H}$ - $^1\text{H}$  ROESY NMR spectrum of **3** in toluene- $d_8$ :

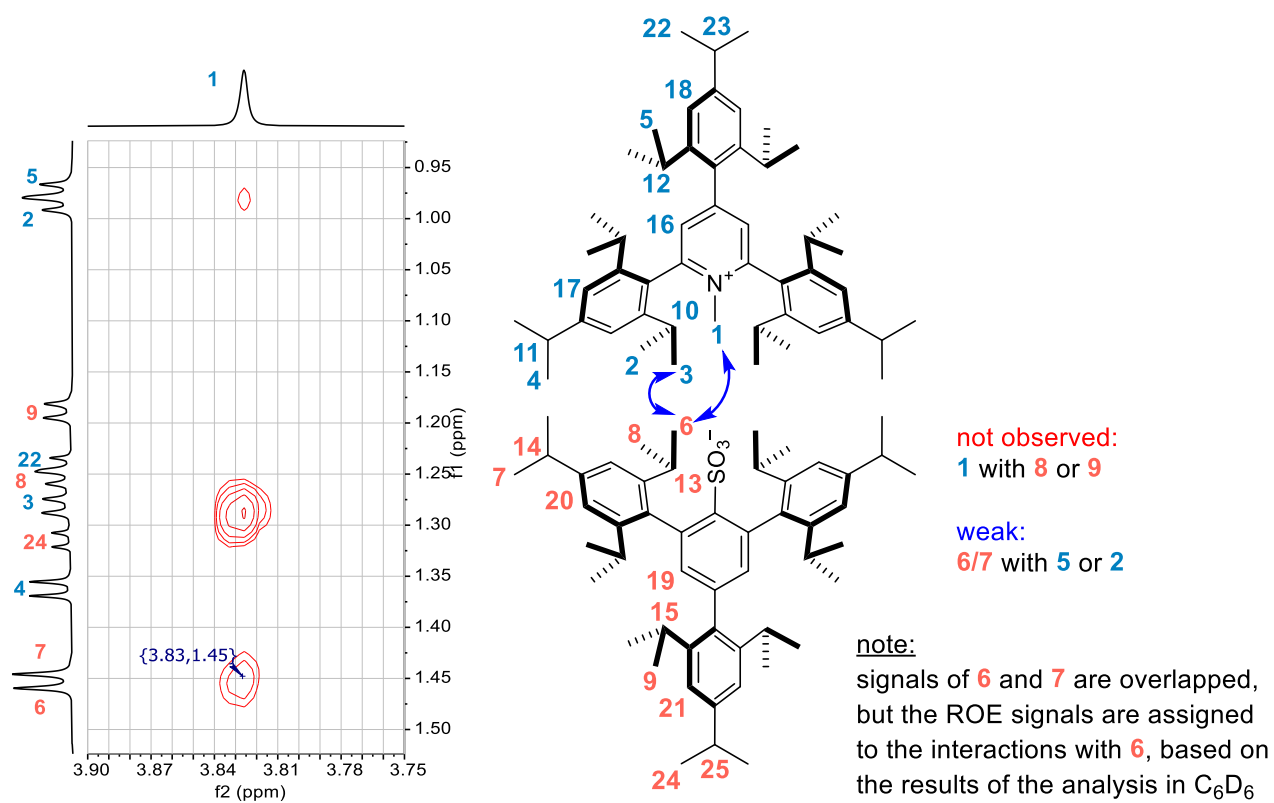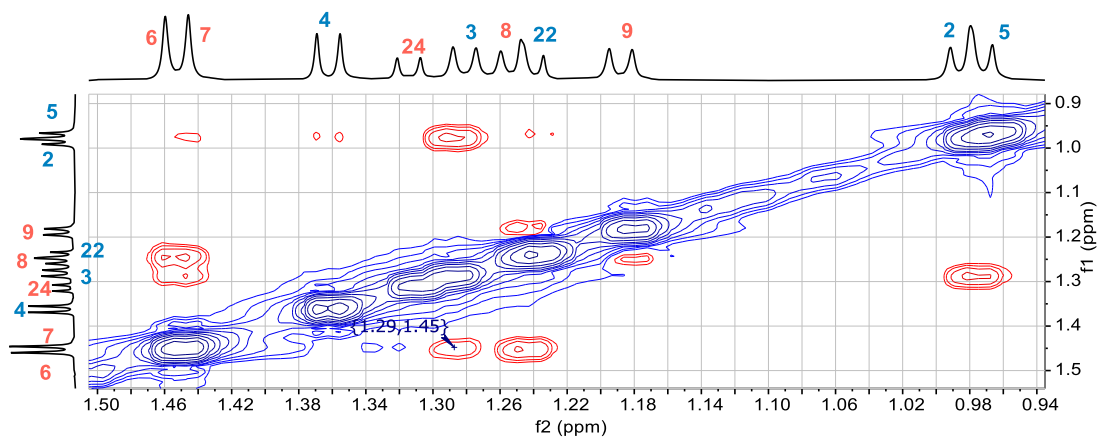

$^1\text{H}$  NMR ( $\text{DMSO-}d_6$ ) spectrum of **3** with assignments:

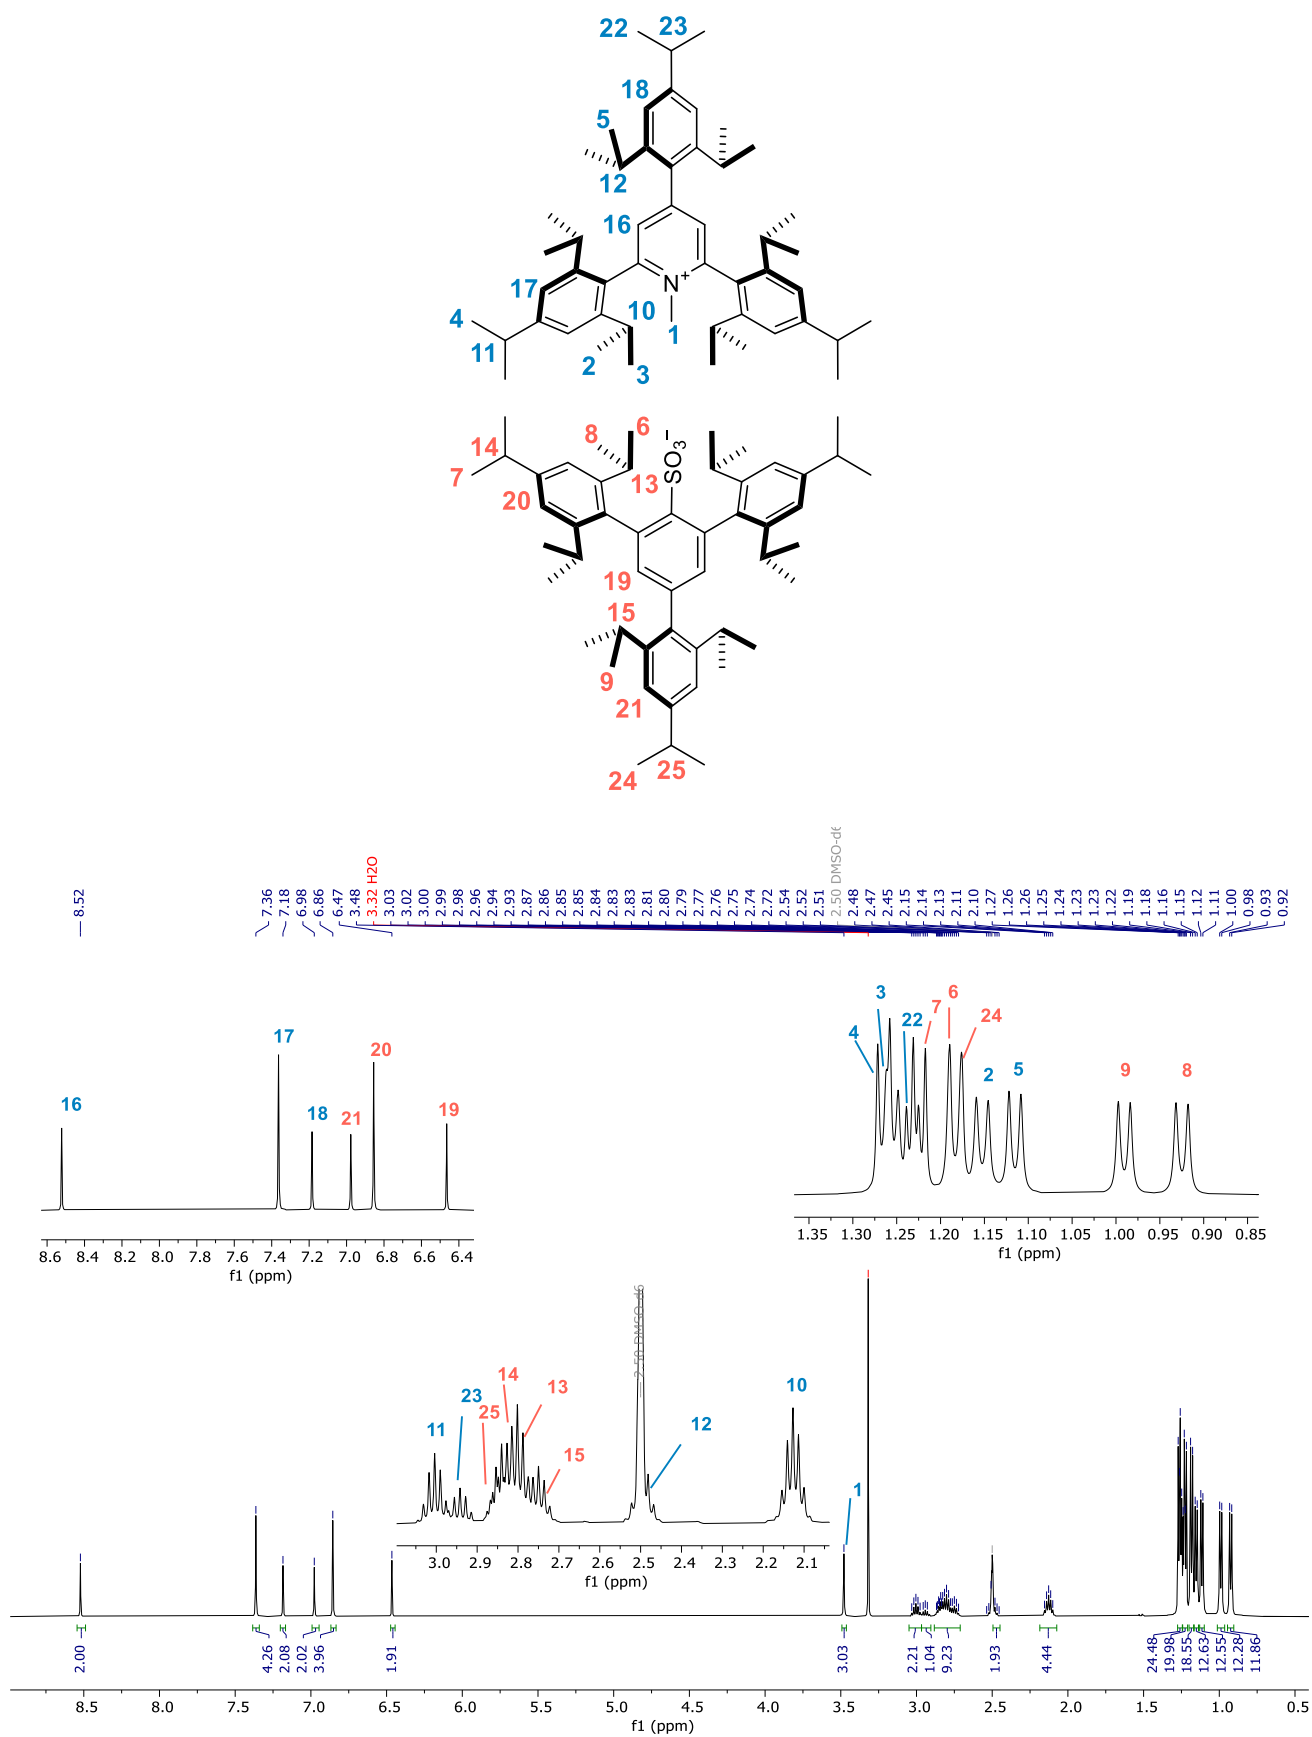

Excerpts from the  $^1\text{H}$ - $^1\text{H}$  ROESY NMR spectrum of **3** in  $\text{DMSO-}d_6$ :

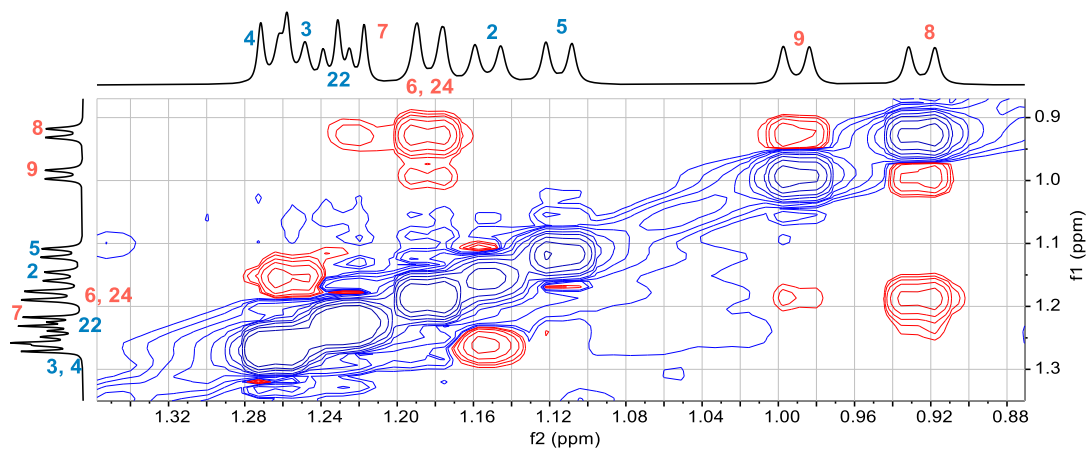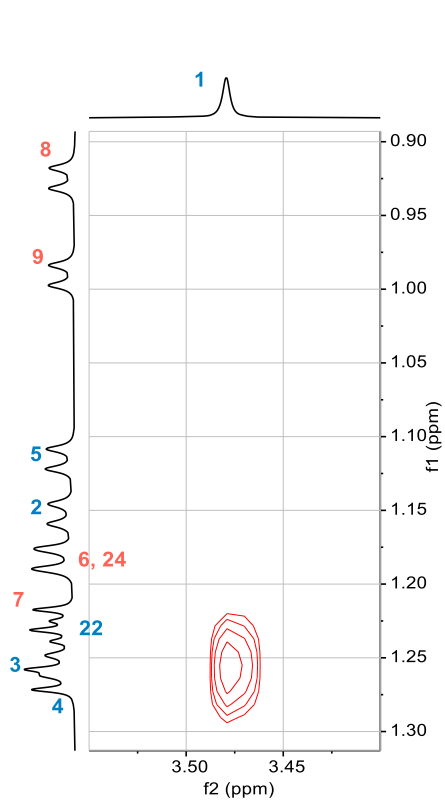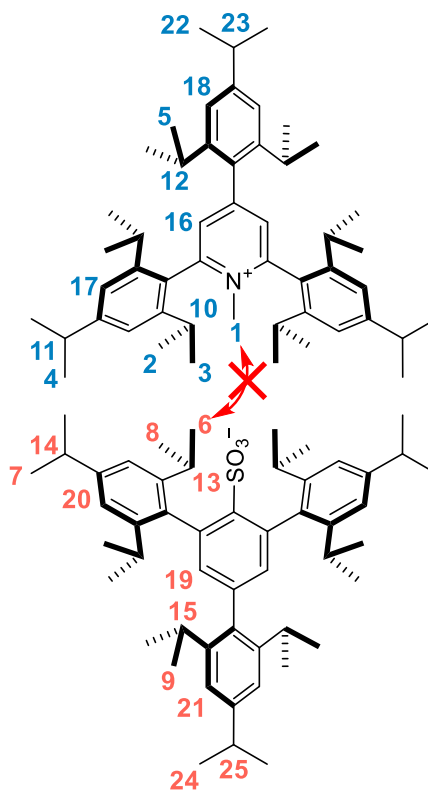

not observed  
or very weak:  
1 with 6

### 2.9.3 Analysis of 7 by ROESY

$^1\text{H}$  NMR ( $\text{C}_6\text{D}_6/\text{CDCl}_3$  9:1) spectrum of 7 with assignments:

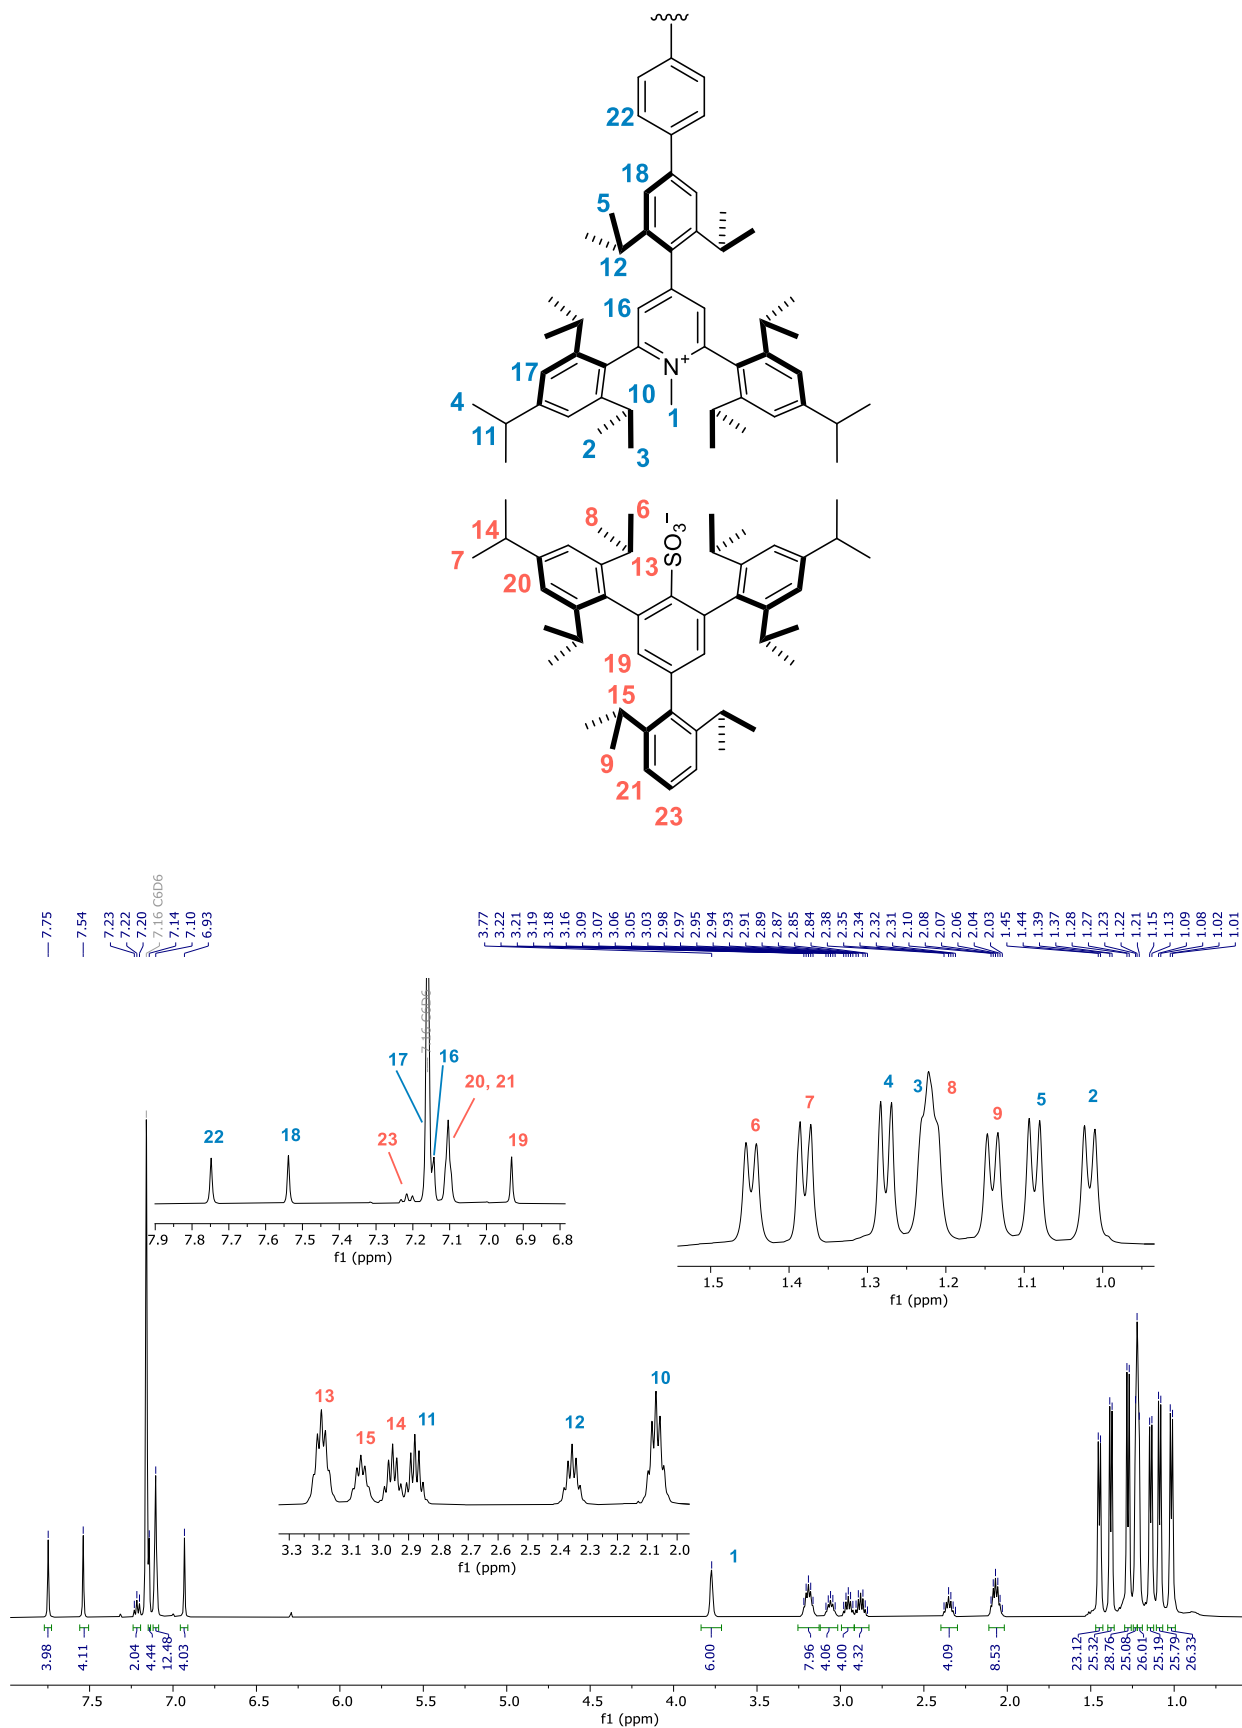

Excerpts from the  $^1\text{H}$ - $^1\text{H}$  ROESY NMR spectrum of **7** in  $\text{C}_6\text{D}_6/\text{CDCl}_3$  9:1:

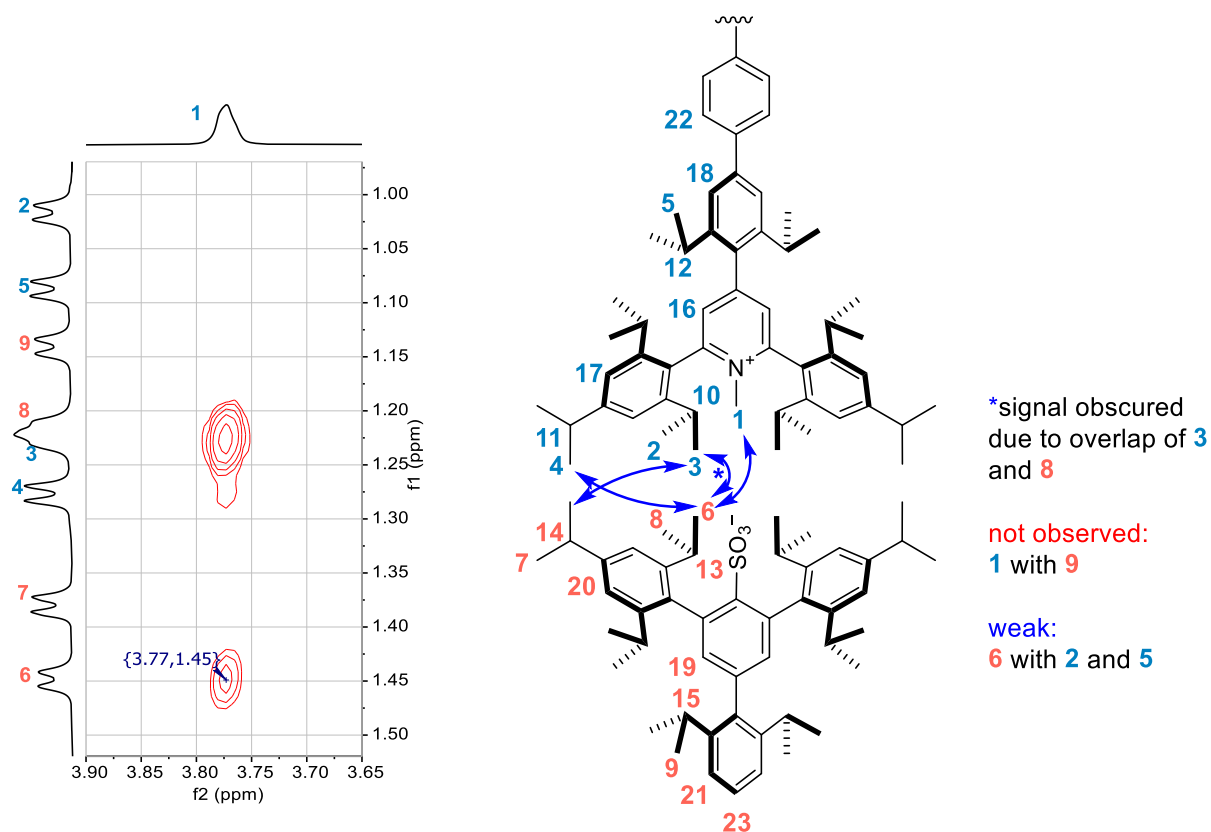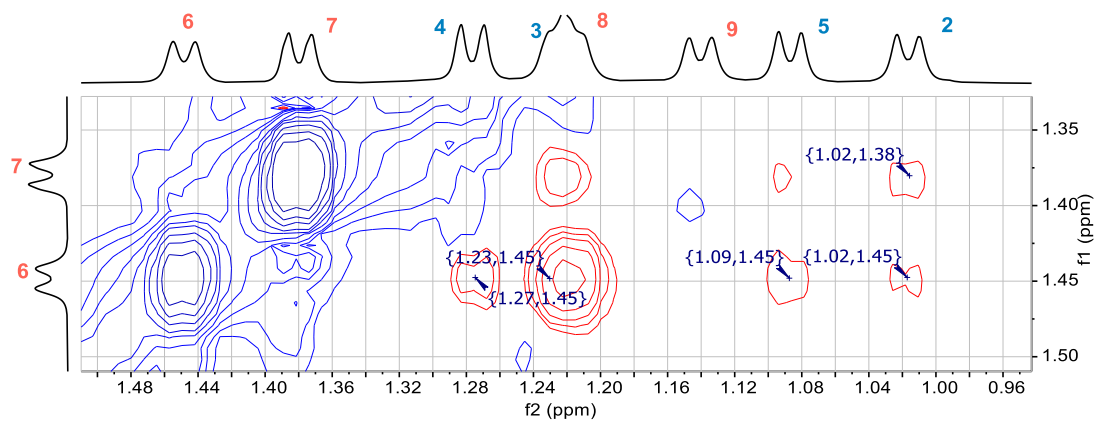

Comparison of the directionality in **7** in solution in C<sub>6</sub>D<sub>6</sub>/CDCl<sub>3</sub> 9:1 and in the solid state:

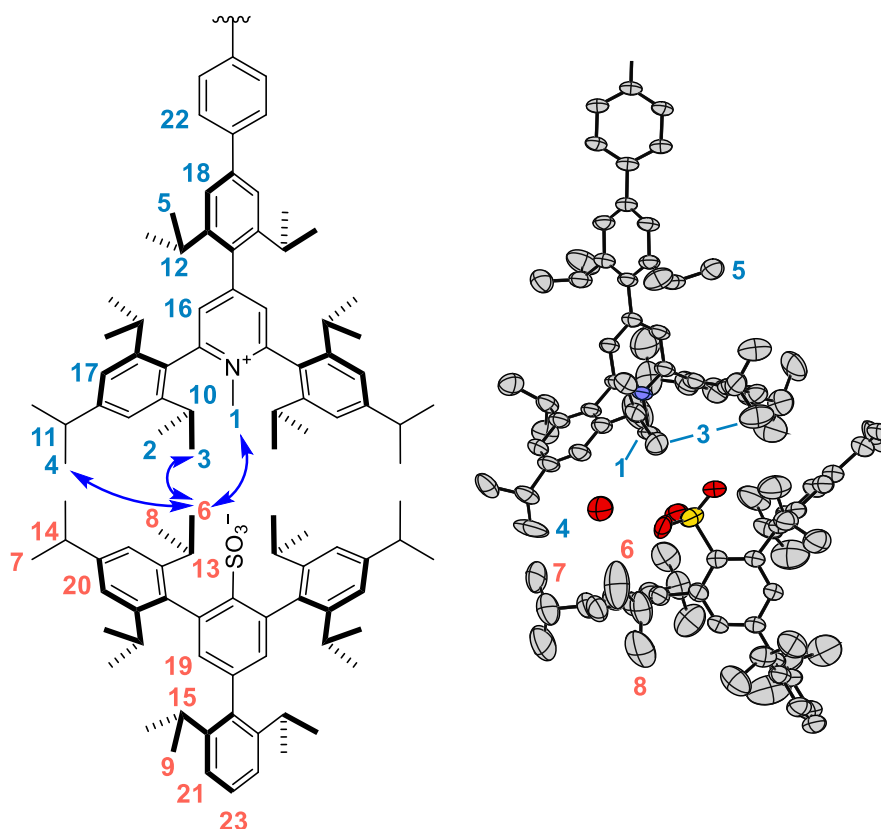

Selected ROE correlations and the corresponding distances, calculated from the integral intensities in **7** in C<sub>6</sub>D<sub>6</sub>/CDCl<sub>3</sub> 9:1:

| Correlation  | F1, ppm | F2, ppm | Distance, Å | Closest distance in X-ray, Å |
|--------------|---------|---------|-------------|------------------------------|
| <b>1-3*</b>  | 1.23    | 3.77    | 2.53        | 2.53                         |
| <b>1-6</b>   | 1.45    | 3.77    | 3.21        | 3.36                         |
| <b>2-6</b>   | 1.01    | 1.45    | 3.35        | 5.49                         |
| <b>3-6**</b> | 1.23    | 1.45    | 2.57        | 2.85                         |
| <b>4-6</b>   | 1.45    | 1.27    | 2.62        | 2.52                         |
| <b>5-6</b>   | 1.08    | 1.45    | 3.25        | 7.11                         |
| <b>2-7</b>   | 1.02    | 1.38    | 4.30        | 4.13                         |
| <b>6-10</b>  | 1.44    | 2.07    | 2.91        | 4.68                         |
| <b>6-22</b>  | 1.44    | 7.75    | —           | 12.36                        |

\*The distance between the two closest protons was taken from the crystal structure of **7** and used as a reference.

\*\*The integral intensity of signal **3-6** was obtained as a difference between the integral intensities of **3-2** and **6-(3&8)** due to the overlap of signals **3** and **8**.



| <i>Correlation</i> | F1, ppm | F2, ppm | Distance, Å | Closest distance in X-ray, Å |
|--------------------|---------|---------|-------------|------------------------------|
| <b>1-10*</b>       | 3.77    | 2.07    | 2.62        | 2.68                         |
| <b>1-6</b>         | 1.45    | 3.77    | 3.44        | 3.36                         |
| <b>2-6</b>         | 1.01    | 1.45    | 3.45        | 5.49                         |
| <b>3-6**</b>       | 1.23    | 1.45    | 2.63        | 2.85                         |
| <b>4-6</b>         | 1.45    | 1.27    | 2.71        | 2.52                         |
| <b>5-6</b>         | 1.08    | 1.45    | 3.34        | 7.11                         |
| <b>2-7</b>         | 1.02    | 1.38    | 4.41        | 4.13                         |
| <b>6-10</b>        | 1.44    | 2.07    | 3.05        | 4.68                         |
| <b>6-22</b>        | 1.44    | 7.75    | –           | 12.36                        |

\* The distance between the two closest protons was taken from the crystal structure of **7** and used as a reference.

\*\*The integral intensity of signal **3-6** was obtained as a difference between the integral intensities of **3-2** and **6-(3&8)** due to the overlap of signals **3** and **8**.

| <i>Correlation</i> | F1, ppm | F2, ppm | Distance, Å | Closest distance in X-ray, Å |
|--------------------|---------|---------|-------------|------------------------------|
| <b>10-12*</b>      | 2.07    | 2.35    | 3.12        | 3.12                         |
| <b>1-6</b>         | 1.45    | 3.77    | 4.17        | 3.36                         |
| <b>2-6</b>         | 1.01    | 1.45    | 4.35        | 5.49                         |
| <b>3-6**</b>       | 1.23    | 1.45    | 3.33        | 2.85                         |
| <b>4-6</b>         | 1.45    | 1.27    | 3.40        | 2.52                         |
| <b>5-6</b>         | 1.08    | 1.45    | 4.22        | 7.11                         |
| <b>2-7</b>         | 1.02    | 1.38    | 5.58        | 4.13                         |
| <b>6-10</b>        | 1.44    | 2.07    | 3.77        | 4.68                         |
| <b>6-22</b>        | 1.44    | 7.75    | –           | 12.36                        |

\* The distance between the two closest protons was taken from the crystal structure of **7** and used as a reference.

\*\*The integral intensity of **3-6** was obtained as a difference between the integral intensities of **3-2** and **6-(3&8)** due to the overlap of signals **3** and **8**.

## 2.9.4 Analysis of **8** by ROESY

$^1\text{H}$  NMR ( $\text{C}_6\text{D}_6\text{-CDCl}_3$ ) spectrum of **8** with assignments:

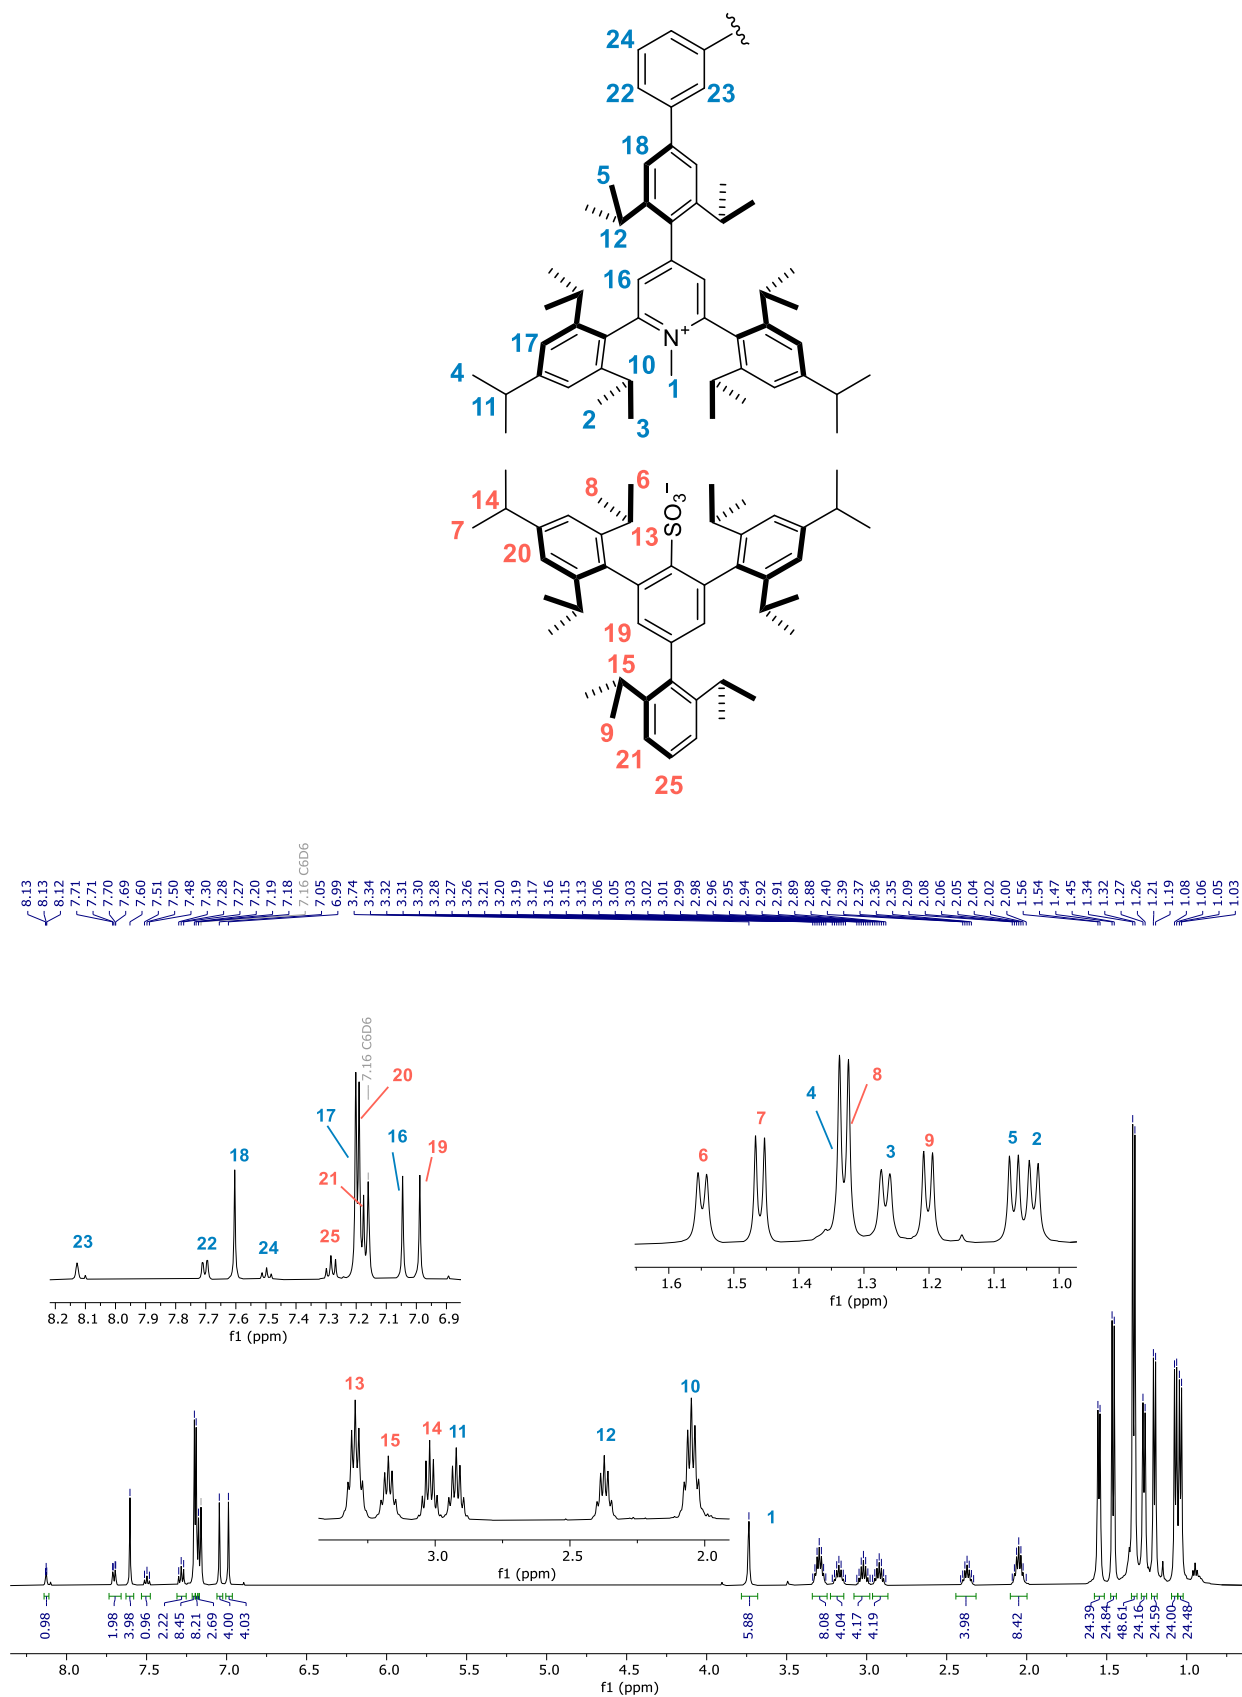

Excerpts from the  $^1\text{H}$ - $^1\text{H}$  ROESY NMR spectrum of **8** in  $\text{C}_6\text{D}_6$ :

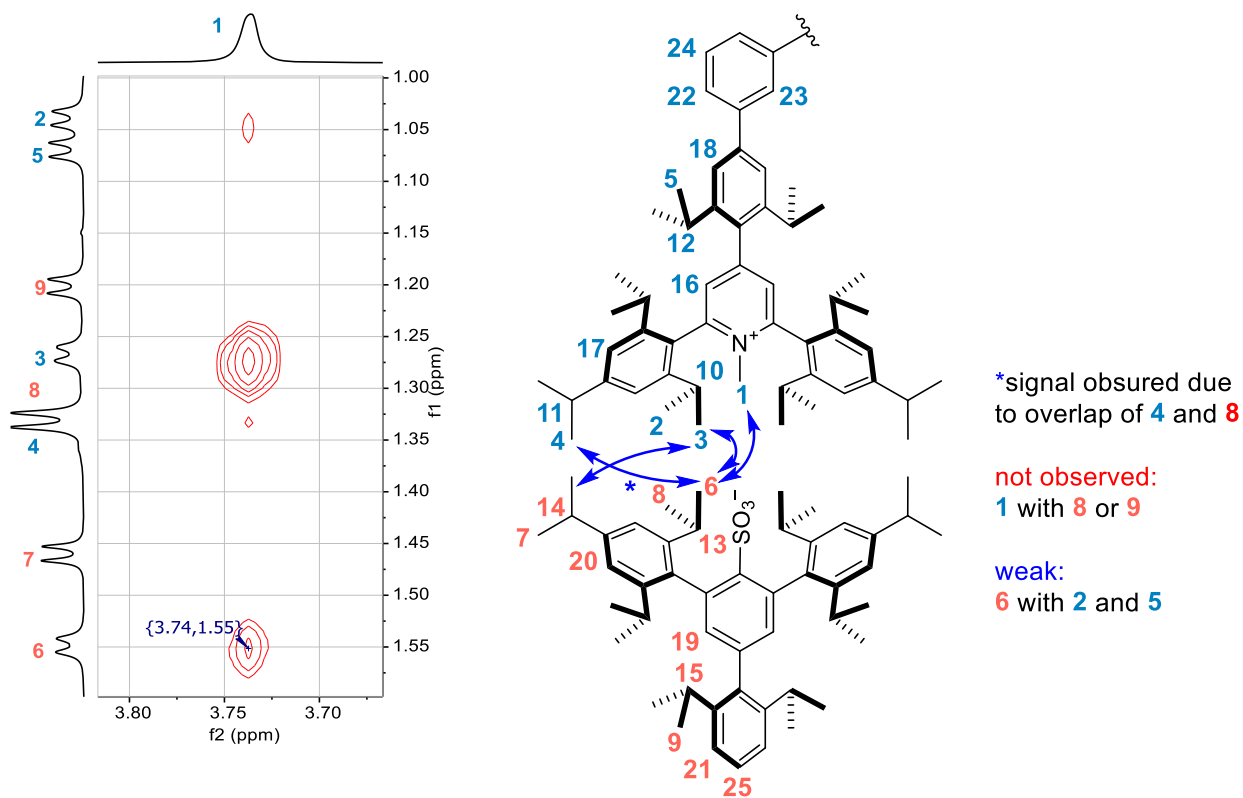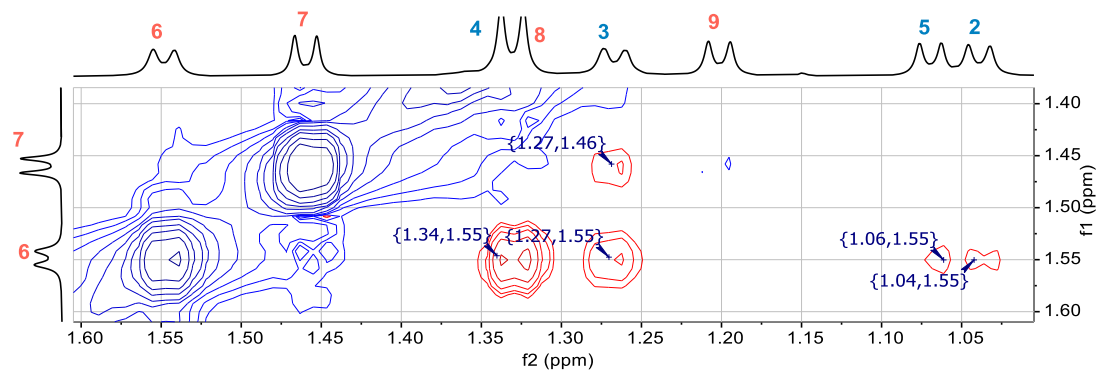

Selected ROE correlations and the corresponding distances, calculated from the integral intensities in **8** in C<sub>6</sub>D<sub>6</sub>:

| <b>Correlation</b> | <b>F1, ppm</b> | <b>F2, ppm</b> | <b>Distance, Å</b> |
|--------------------|----------------|----------------|--------------------|
| <b>1-3*</b>        | 1.27           | 3.75           | 2.53               |
| <b>1-6</b>         | 1.55           | 3.75           | 3.22               |
| <b>2-6</b>         | 1.04           | 1.55           | 3.06               |
| <b>3-6</b>         | 1.25           | 1.55           | 2.53               |
| <b>3-7</b>         | 1.46           | 1.26           | 2.75               |
| <b>6-5</b>         | 1.55           | 1.06           | 2.91               |
| <b>6-22</b>        | 1.55           | 7.71           | –                  |

\* The distance between the two closest protons was taken from the crystal structure of **7** and used as a reference.

| <b>Correlation</b> | <b>F1, ppm</b> | <b>F2, ppm</b> | <b>Distance, Å</b> |
|--------------------|----------------|----------------|--------------------|
| <b>1-10*</b>       | 3.75           | 2.06           | 2.62               |
| <b>1-6</b>         | 1.55           | 3.75           | 3.33               |
| <b>2-6</b>         | 1.04           | 1.55           | 3.17               |
| <b>3-6</b>         | 1.25           | 1.55           | 2.62               |
| <b>3-7</b>         | 1.46           | 1.26           | 2.85               |
| <b>6-5</b>         | 1.55           | 1.06           | 3.01               |
| <b>6-22</b>        | 1.55           | 7.71           | –                  |

\* The distance between the two closest protons was taken from the crystal structure of **7** and used as a reference.

| <b>Correlation</b> | <b>F1, ppm</b> | <b>F2, ppm</b> | <b>Distance, Å</b> |
|--------------------|----------------|----------------|--------------------|
| <b>10-12*</b>      | 2.06           | 2.37           | 3.12               |
| <b>1-6</b>         | 1.55           | 3.75           | 3.90               |
| <b>2-6</b>         | 1.04           | 1.55           | 3.71               |
| <b>3-6</b>         | 1.25           | 1.55           | 3.07               |
| <b>3-7</b>         | 1.46           | 1.26           | 3.33               |
| <b>6-5</b>         | 1.55           | 1.06           | 3.52               |
| <b>6-22</b>        | 1.55           | 7.71           | –                  |

\* The distance between the two closest protons was taken from the crystal structure of **7** and used as a reference.

## 2.9.5 Analysis of **3** in the presence of $n\text{Bu}_4\text{N}^+\text{BF}_4^-$

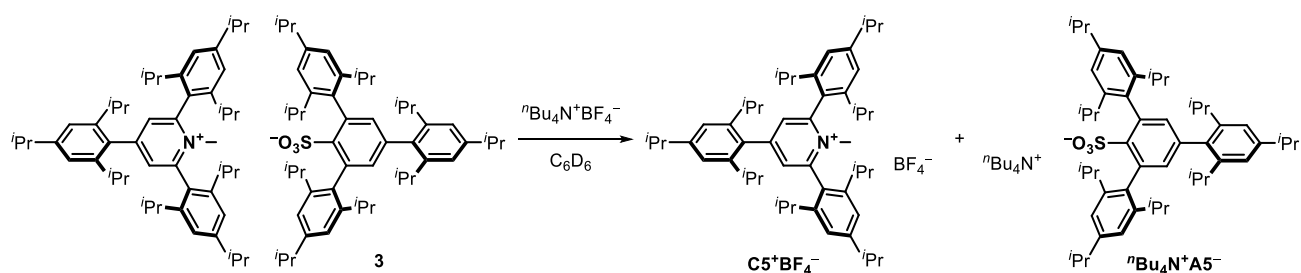

Procedure:  $n\text{Bu}_4\text{N}^+\text{BF}_4^-$  (ca. 1.7 equiv.) was added to an NMR tube containing a solution of **3** in  $\text{C}_6\text{D}_6$  at room temperature in an  $\text{N}_2$  filled glovebox. The mixture was shaken and analyzed by NMR spectroscopy.

$^1\text{H}$  NMR ( $\text{C}_6\text{D}_6$ ) spectrum of **3** +  $n\text{Bu}_4\text{N}^+\text{BF}_4^-$  with assignments:

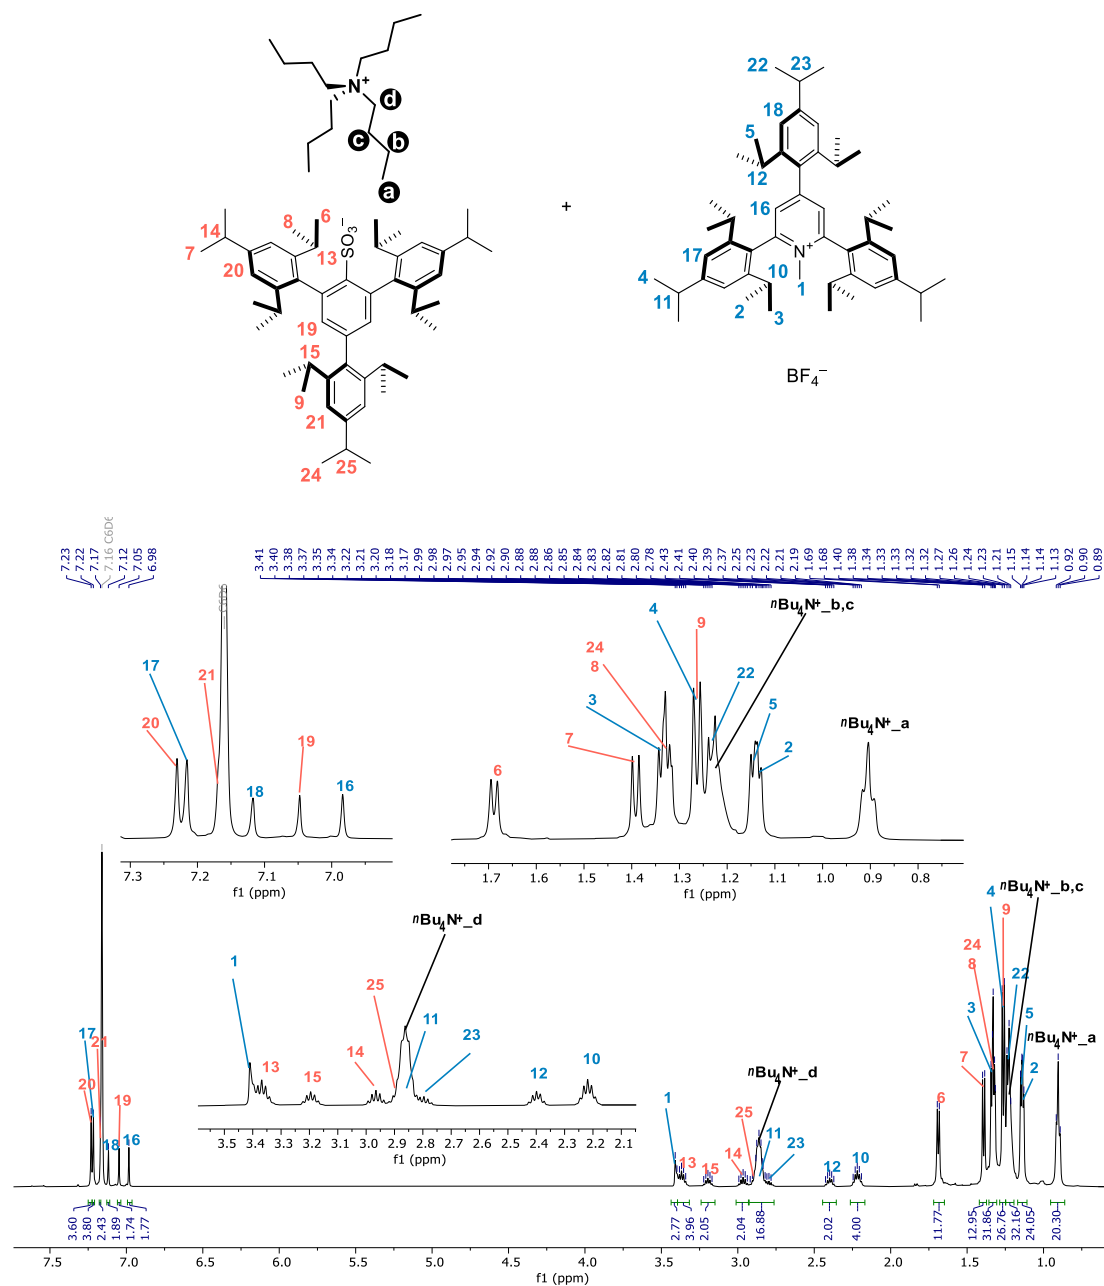

Excerpts from  $^1\text{H}$ - $^1\text{H}$  ROESY NMR of **3** +  $^n\text{Bu}_4\text{N}^+\text{BF}_4^-$  in  $\text{C}_6\text{D}_6$ :

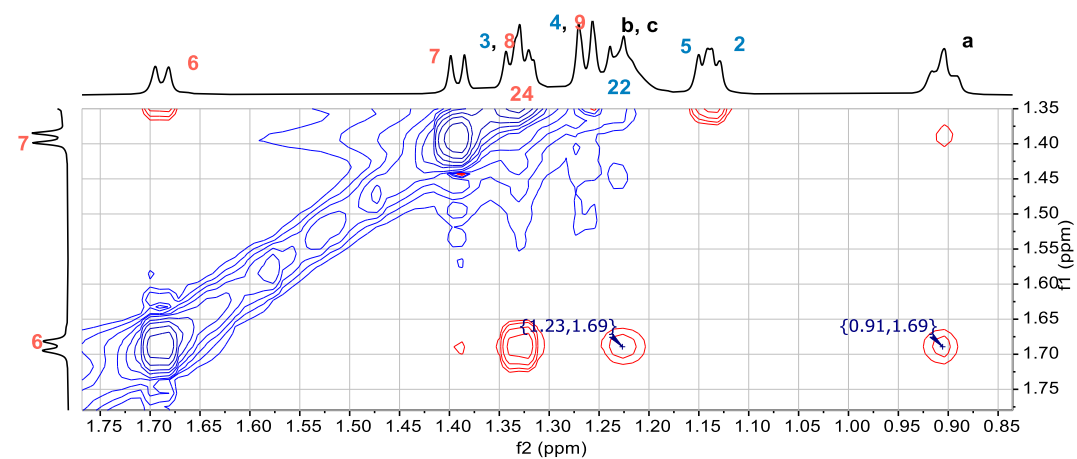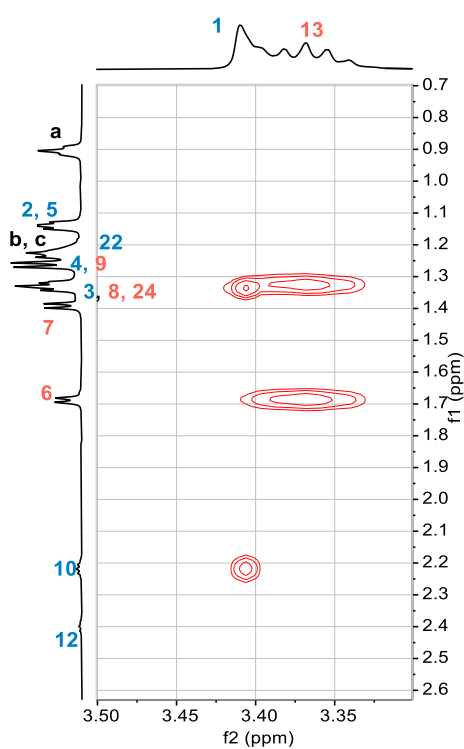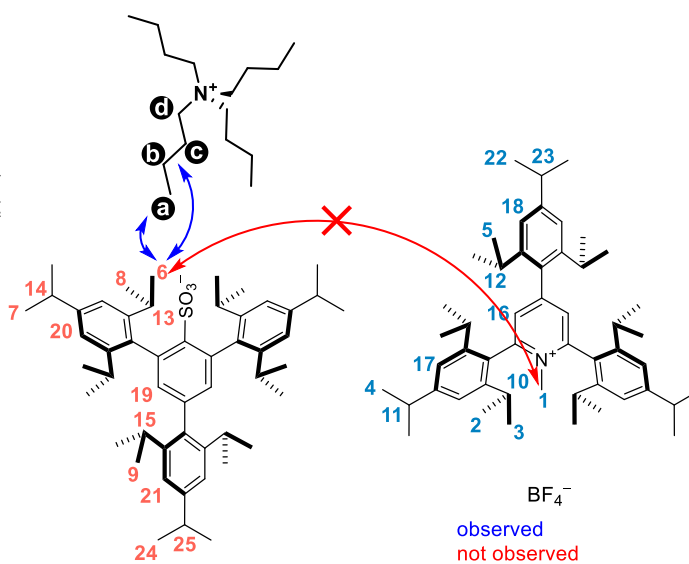

ROESY (C<sub>6</sub>D<sub>6</sub>) of **3** + <sup>n</sup>Bu<sub>4</sub>N<sup>+</sup>BF<sub>4</sub><sup>-</sup>:

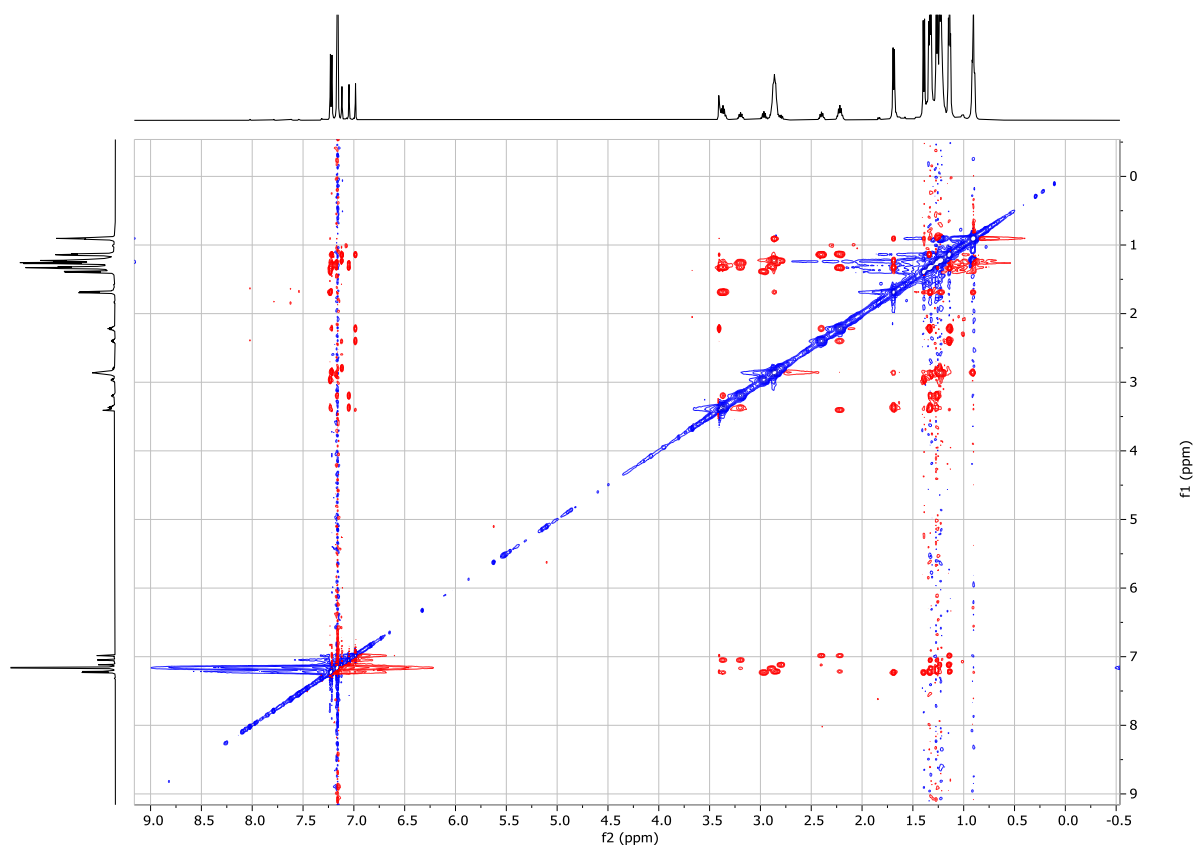

## 2.10 <sup>1</sup>H-<sup>1</sup>H DOSY NMR experiments

The diffusion coefficients of ion pairs were determined in specified solvents at 298 K. For this purpose, bipolar gradient pulse sequence *ledbpgp2s* was employed on a Bruker Avance III 500 MHz spectrometer. The sigmoidal decay of intensity was fitted to the Stejskal-Tanner equation using the routine DOSY algorithm implemented in TopSpin 4.1.1. The hydrodynamic radii were calculated solving a modified Stokes-Einstein equation<sup>11</sup>:

$$D = \frac{k_B T}{6 \left( 1 + 0.695 \left( \frac{r_s}{r_h} \right)^{2.234} \right) \times \pi \eta r_h}$$

Where,  $D$  – diffusion coefficient [ $\text{m}^2 \text{s}^{-1}$ ];  $k_B$  – Boltzmann constant  $1.3806485 \times 10^{-23}$  [ $\text{m}^2 \text{kg s}^{-2} \text{K}^{-1}$ ];  $T$  – temperature [K];  $r_s$  – hydrodynamic radius of the solvent [m];  $r_h$  – hydrodynamic radius of the pair [m];  $\eta$  – viscosity of the solvent at temperature  $T$  [ $\text{kg m}^{-1} \text{s}^{-1}$ ]. Values for viscosity and solvent hydrodynamic radii were taken from the respective literature sources.<sup>12,13</sup> This approach has been previously used to estimate the size of various supramolecular systems.<sup>14–16</sup>

Calculated hydrodynamic parameters of **3** in different solvents using <sup>1</sup>H-<sup>1</sup>H DOSY NMR:

| Solvent                             | $D \times 10^{10} \text{ m}^2 \text{ s}^{-1}$ | $r_s, \text{ nm}$ | $\eta \times 10^4, \text{ kg m}^{-1} \text{ s}^{-1}$ | $r_h, \text{ nm}$ | $d_h, \text{ nm}$ |
|-------------------------------------|-----------------------------------------------|-------------------|------------------------------------------------------|-------------------|-------------------|
| <b>C<sub>6</sub>D<sub>6</sub></b>   | 5.618                                         | 0.270             | 6.03                                                 | 0.70              | 1.40              |
| <b>PhMe-<i>d</i><sub>8</sub></b>    | 5.803                                         | 0.287             | 5.51                                                 | 0.74              | 1.48              |
| <b>CDCl<sub>3</sub></b>             | 4.860                                         | 0.260             | 5.42                                                 | 0.87              | 1.74              |
| <b>CD<sub>2</sub>Cl<sub>2</sub></b> | 8.314                                         | 0.249             | 4.13                                                 | 0.68              | 1.36              |
| <b>DMSO-<i>d</i><sub>6</sub></b>    | 1.590                                         | 0.263             | 19.9                                                 | 0.74              | 1.48              |

Calculated hydrodynamic parameters of different ion pairs in C<sub>6</sub>D<sub>6</sub> by <sup>1</sup>H-<sup>1</sup>H DOSY NMR.

| Pair                                 | $D \times 10^{10} \text{ m}^2 \text{ s}^{-1}$ | $r_h, \text{ nm}$ | $d_h, \text{ nm}$ |
|--------------------------------------|-----------------------------------------------|-------------------|-------------------|
| <b>2</b>                             | 5.350                                         | 0.73              | 1.46              |
| <b>3</b>                             | 5.620                                         | 0.70              | 1.40              |
| <b>C3<sup>+</sup>A3<sup>-</sup></b>  | 7.260                                         | 0.56              | 1.12              |
| <b>C2<sup>+</sup>A4<sup>-</sup></b>  | 4.589                                         | 0.83              | 1.67              |
| <b>C4<sup>+</sup>A2<sup>-*</sup></b> | 5.080                                         | 0.76              | 1.52              |
| <b>7*</b>                            | 2.868                                         | 1.29              | 2.58              |
| <b>8</b>                             | 3.488                                         | 1.07              | 2.14              |
| <b>9</b>                             | 2.250                                         | 1.63              | 2.26              |

\*10% of CDCl<sub>3</sub> was added to cope with solubility issues in C<sub>6</sub>D<sub>6</sub>. It was assumed that this amount is not enough to compromise the estimation of the hydrodynamic radii.



Comparison of the hydrodynamic diameter obtained from the DOSY NMR data with the molecular size of **7** (the geometry of **7** is the experimental solid-state geometry):

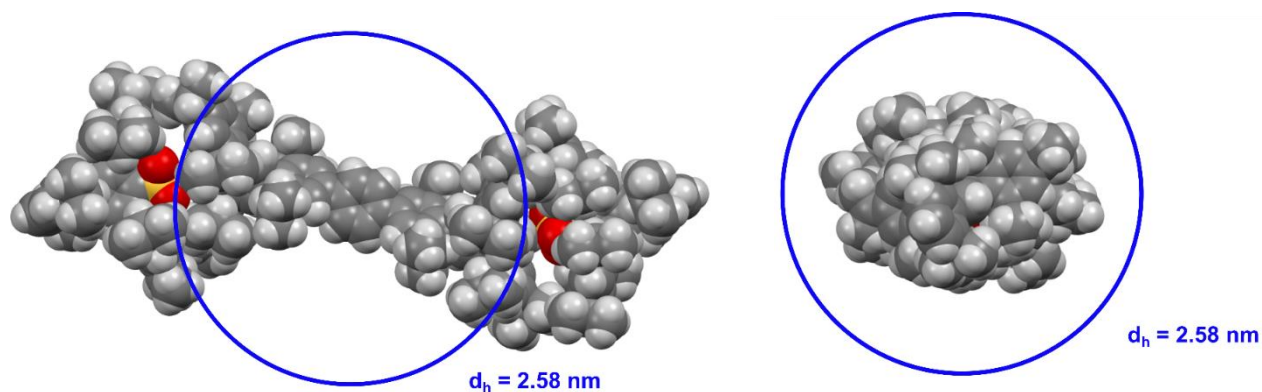

Comparison of the hydrodynamic diameter obtained from the DOSY NMR data with the molecular size of **8** (the geometry of **8** was optimized using the PM6 semi-empirical method by using fragments from separate geometries of **C5<sup>+</sup>** and **A5<sup>-</sup>** that were optimized at the M06-2X/6-31+G(d,p) level of theory):

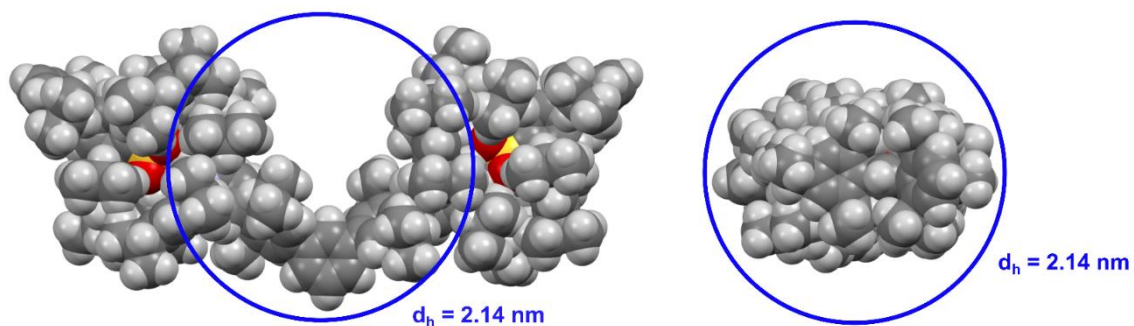

$^1\text{H}$ - $^1\text{H}$  DOSY NMR of  $\text{C2}^+\text{A4}^-$  in  $\text{C}_6\text{D}_6$ :

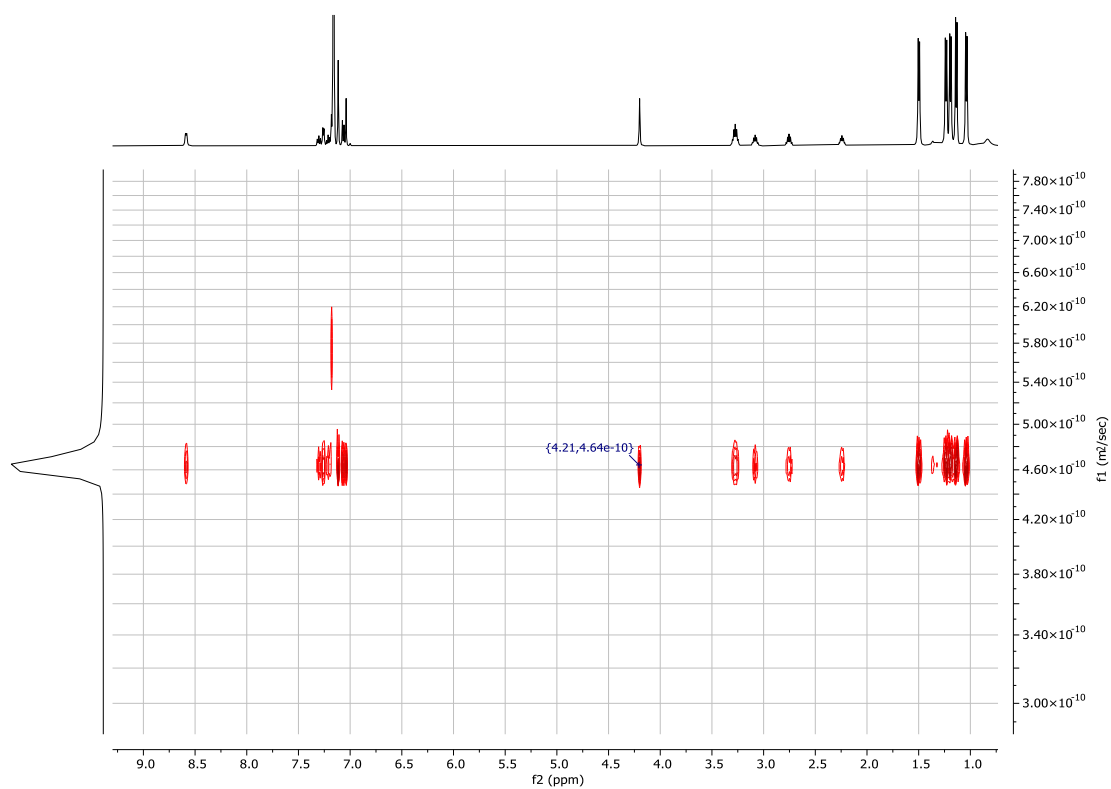

$^1\text{H}$ - $^1\text{H}$  DOSY NMR of  $\text{C4}^+\text{A2}^-$  in  $\text{C}_6\text{D}_6/\text{CDCl}_3$  9:1:

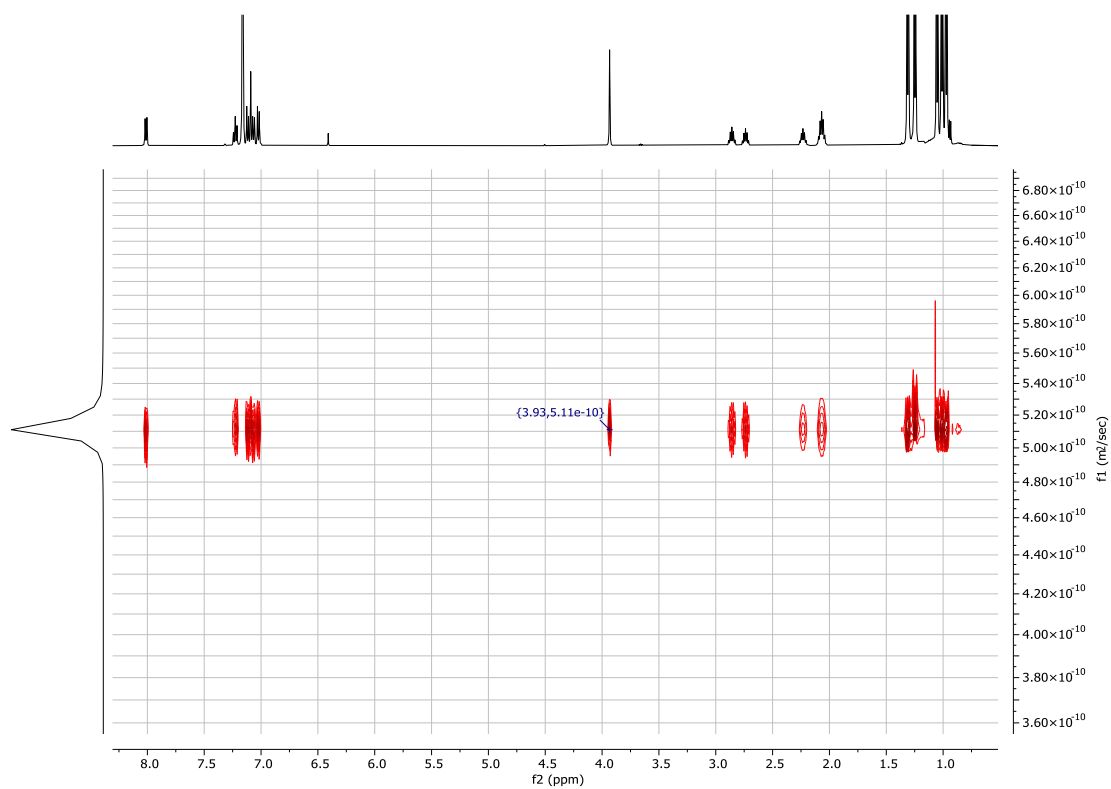

$^1\text{H}$ - $^1\text{H}$  DOSY NMR of  $\text{C3}^+\text{A3}^-$  in  $\text{C}_6\text{D}_6$ :

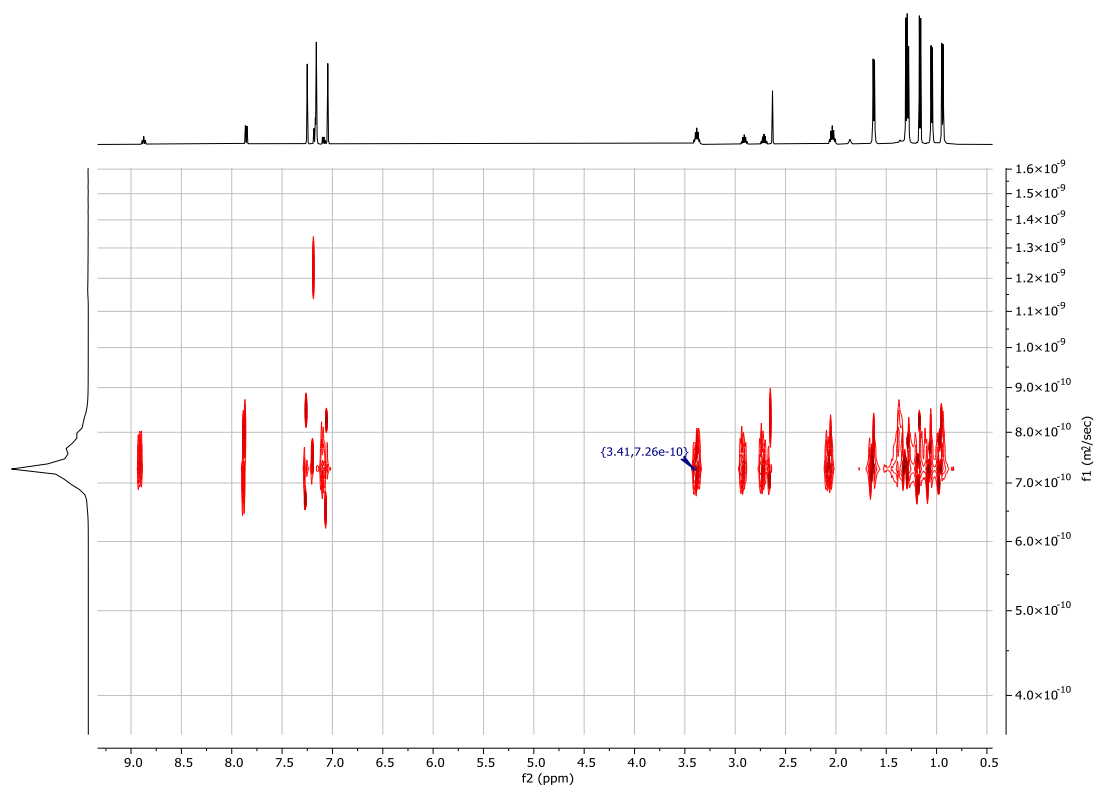

$^1\text{H}$ - $^1\text{H}$  DOSY NMR of **2** in  $\text{C}_6\text{D}_6$ :

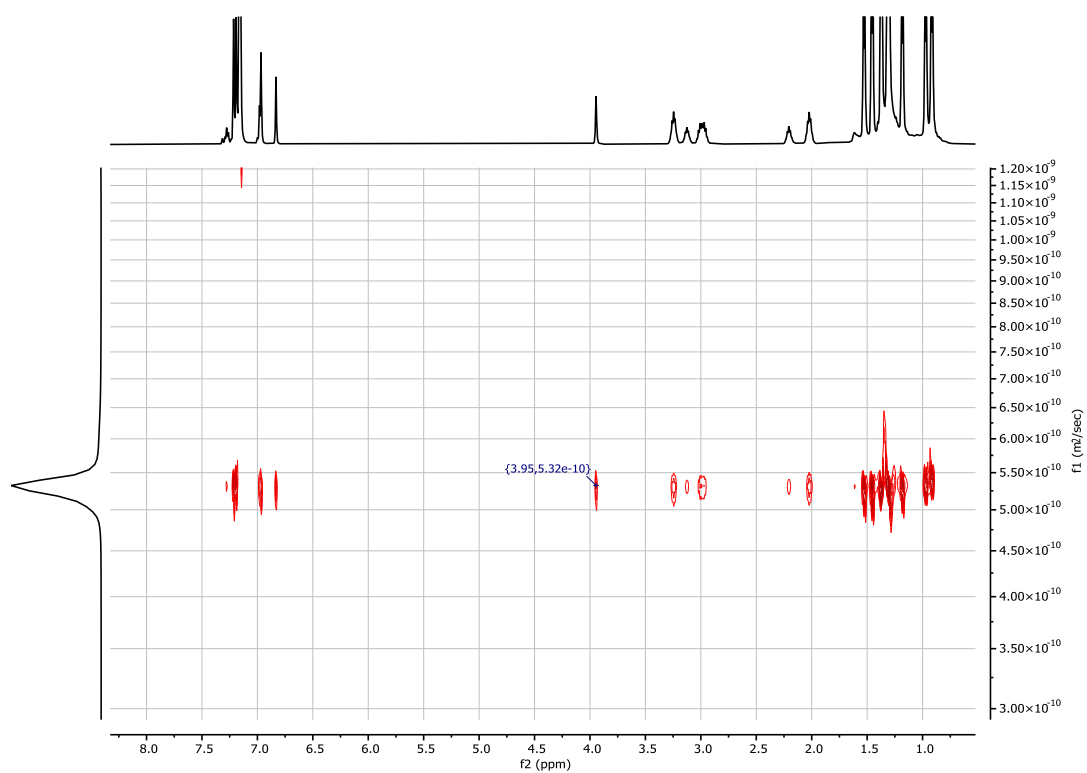

$^1\text{H}$ - $^1\text{H}$  DOSY NMR of **3** in  $\text{C}_6\text{D}_6$ :

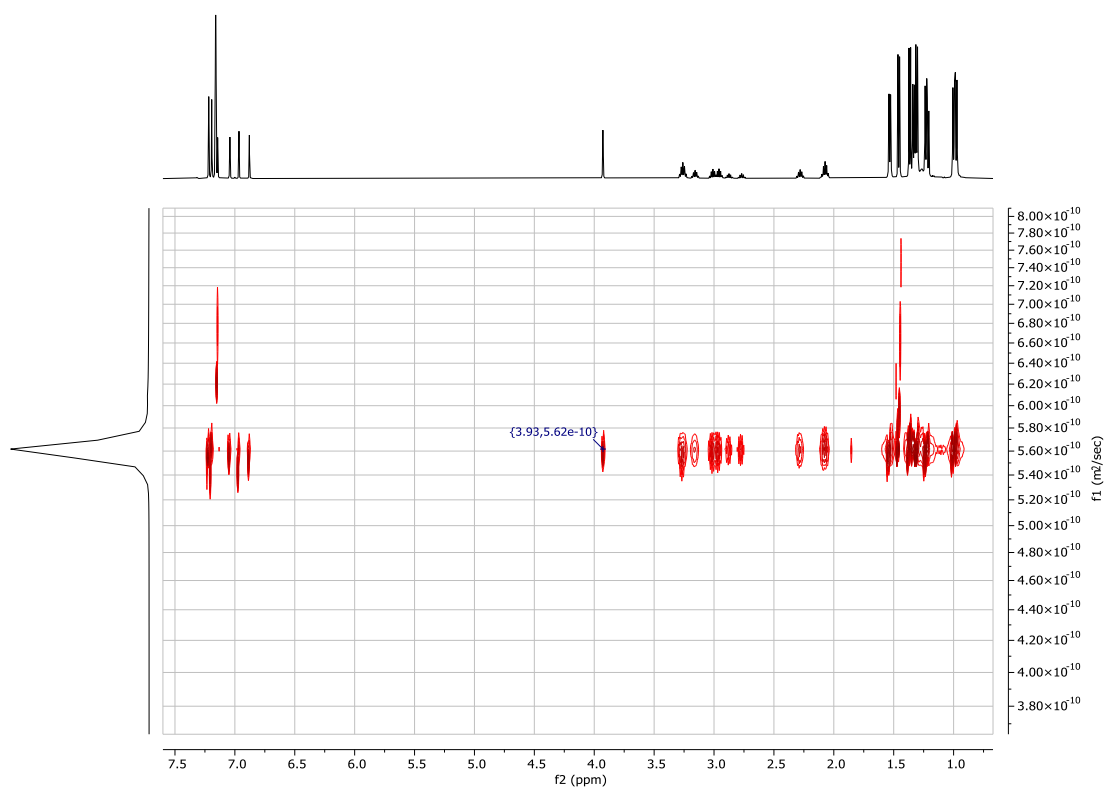

$^1\text{H}$ - $^1\text{H}$  DOSY NMR of **3** in toluene- $d_8$ :

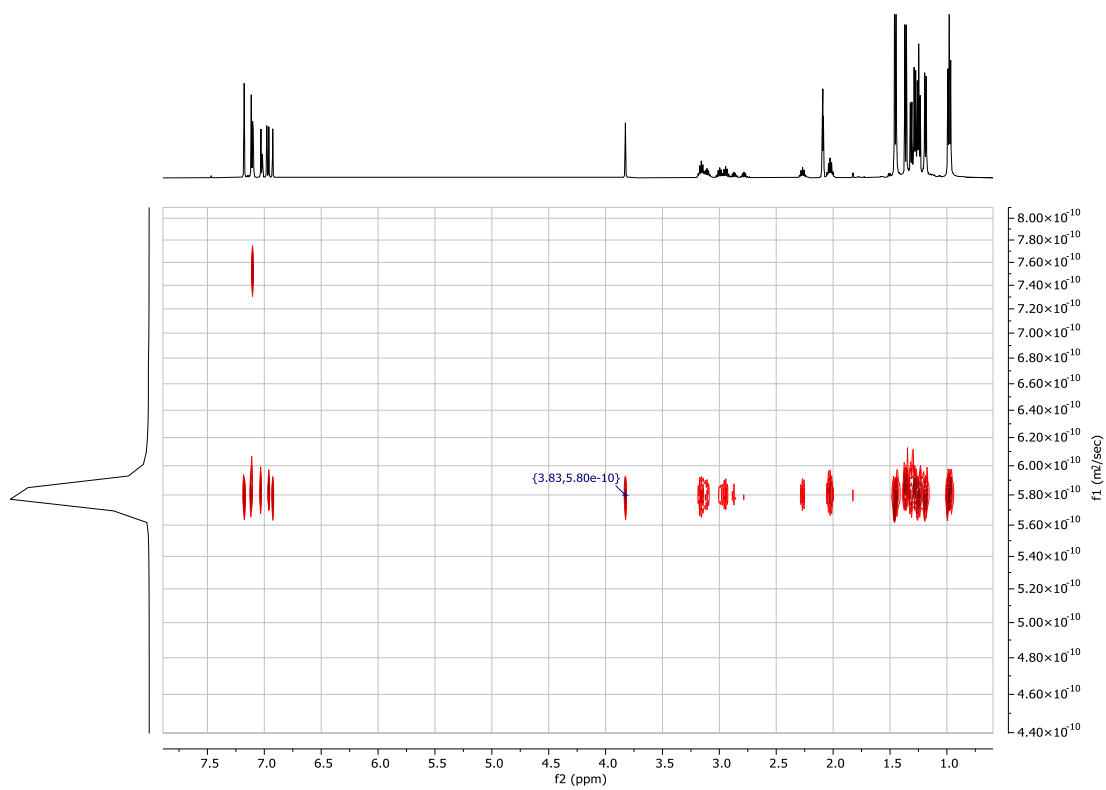

$^1\text{H}$ - $^1\text{H}$  DOSY NMR of **3** in  $\text{CDCl}_3$ :

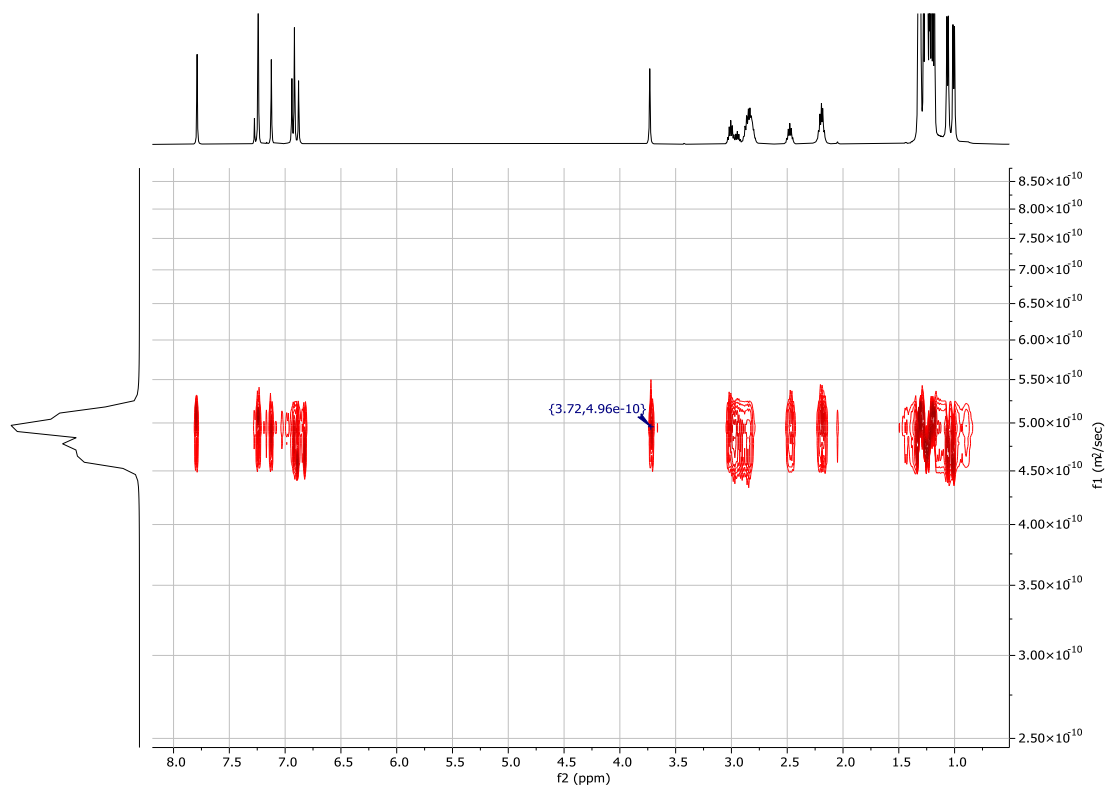

$^1\text{H}$ - $^1\text{H}$  DOSY NMR of **3** in  $\text{CD}_2\text{Cl}_2$ :

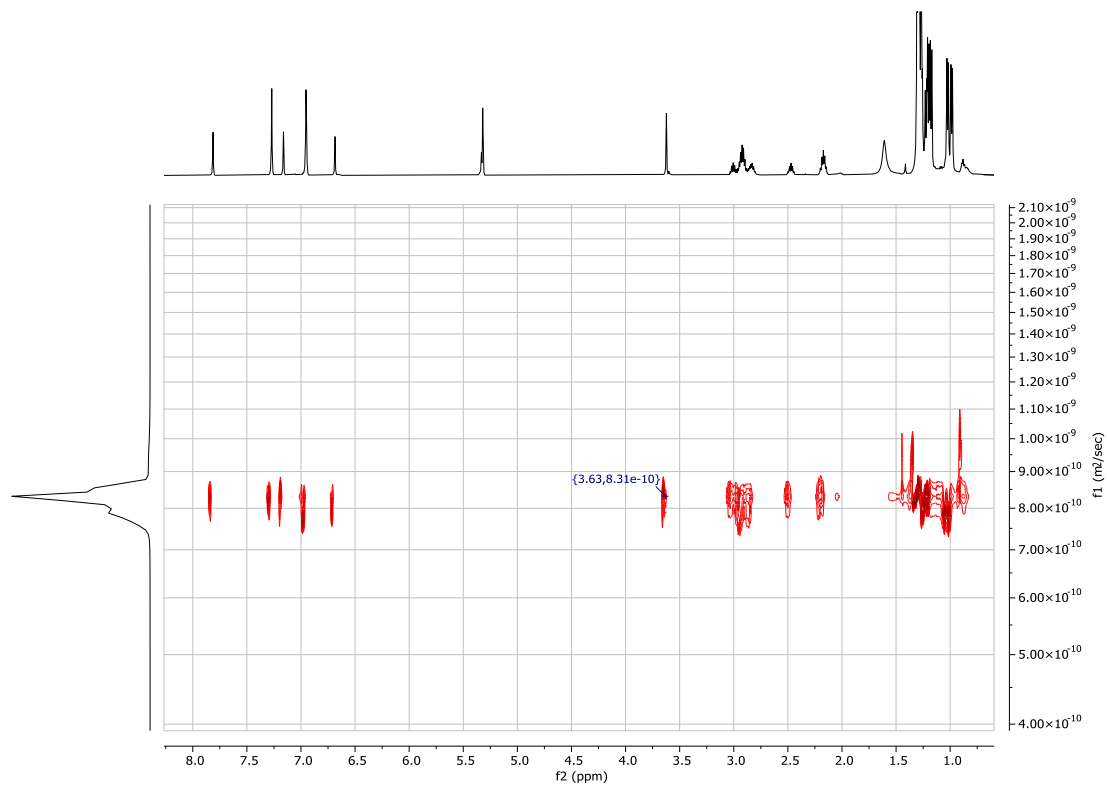

$^1\text{H}$ - $^1\text{H}$  DOSY NMR of **3** in  $\text{DMSO-}d_6$ :

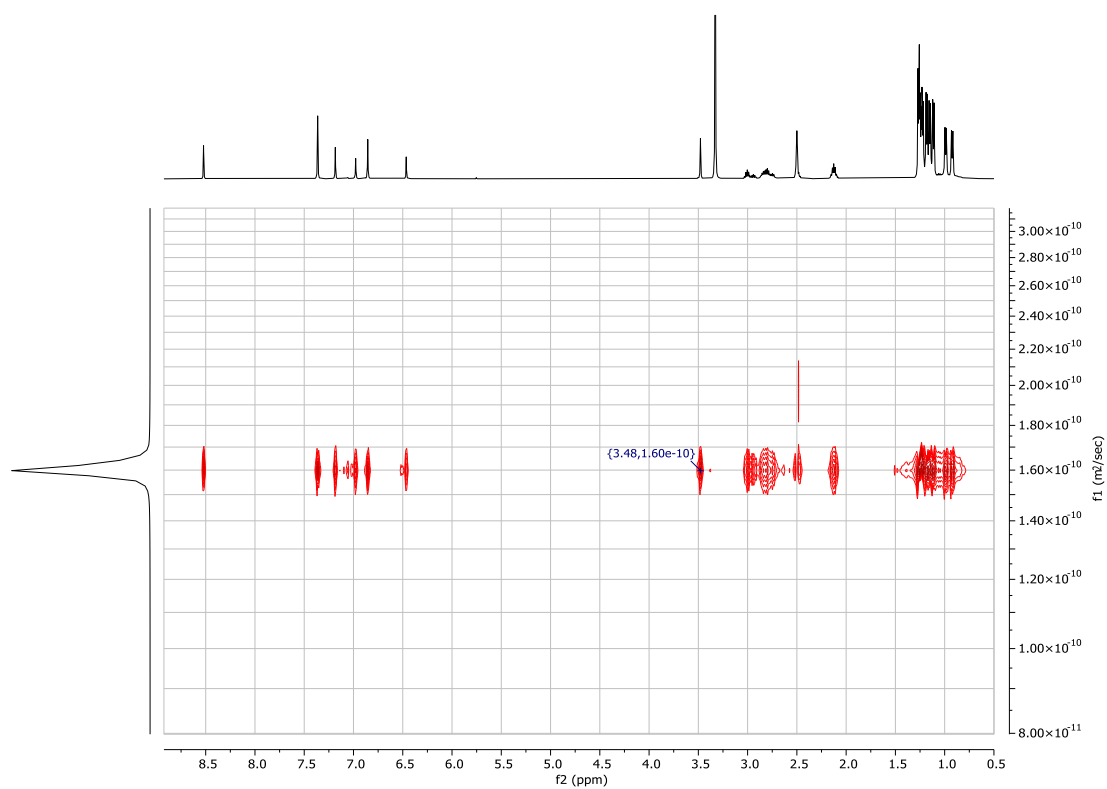

$^1\text{H}$ - $^1\text{H}$  DOSY NMR of **7** in  $\text{C}_6\text{D}_6/\text{CDCl}_3$  9:1:

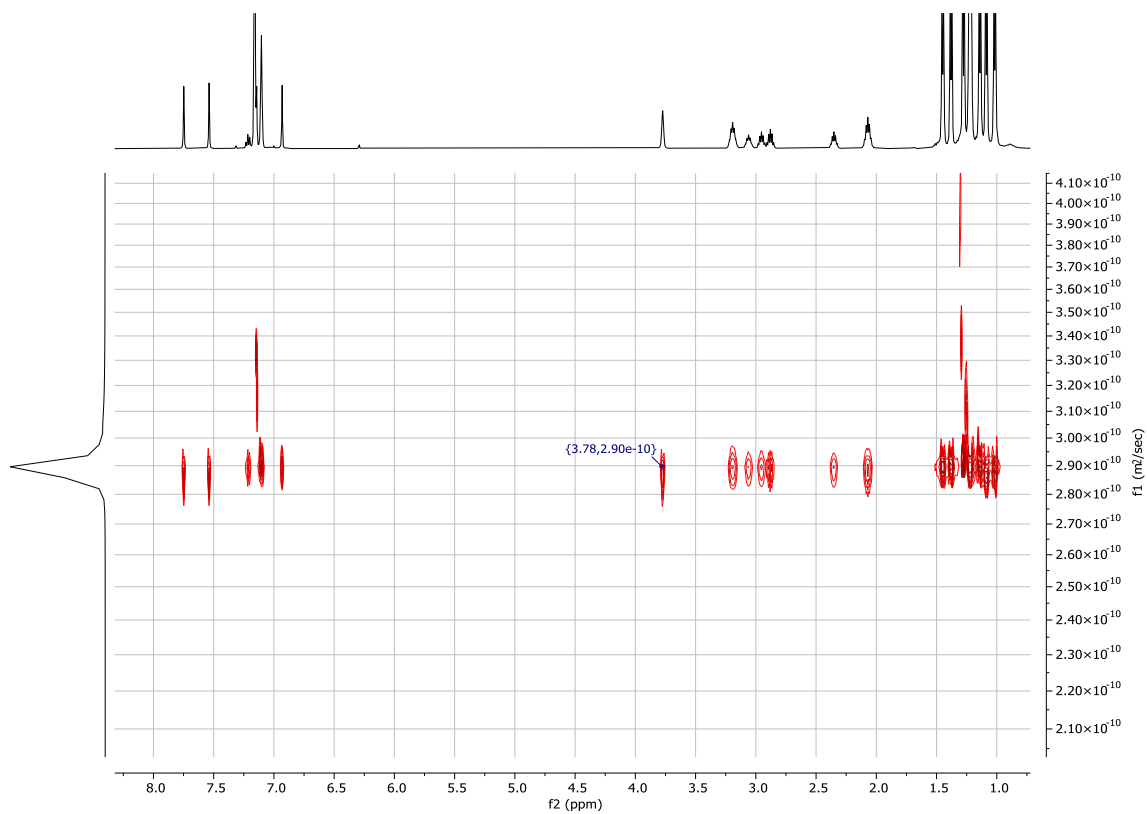

$^1\text{H}$ - $^1\text{H}$  DOSY NMR of **8** in  $\text{C}_6\text{D}_6$ :

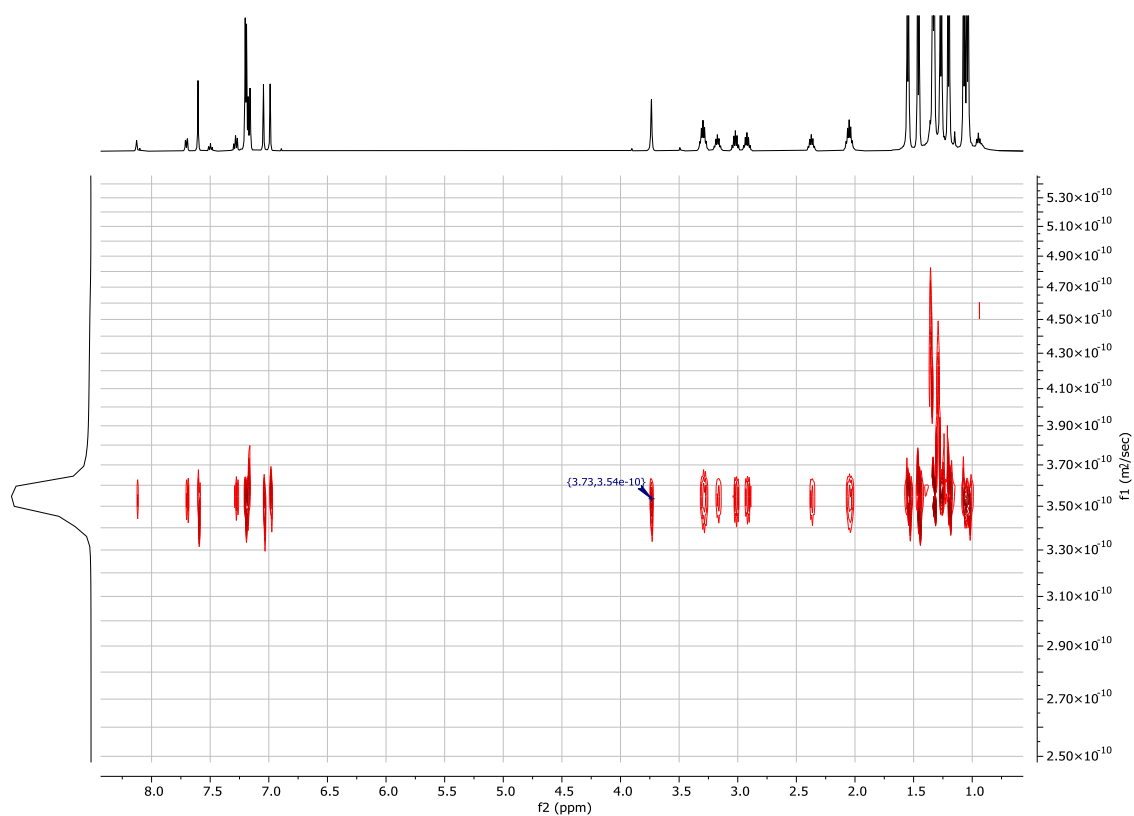

$^1\text{H}$ - $^1\text{H}$  DOSY NMR of **9** in  $\text{C}_6\text{D}_6$ :

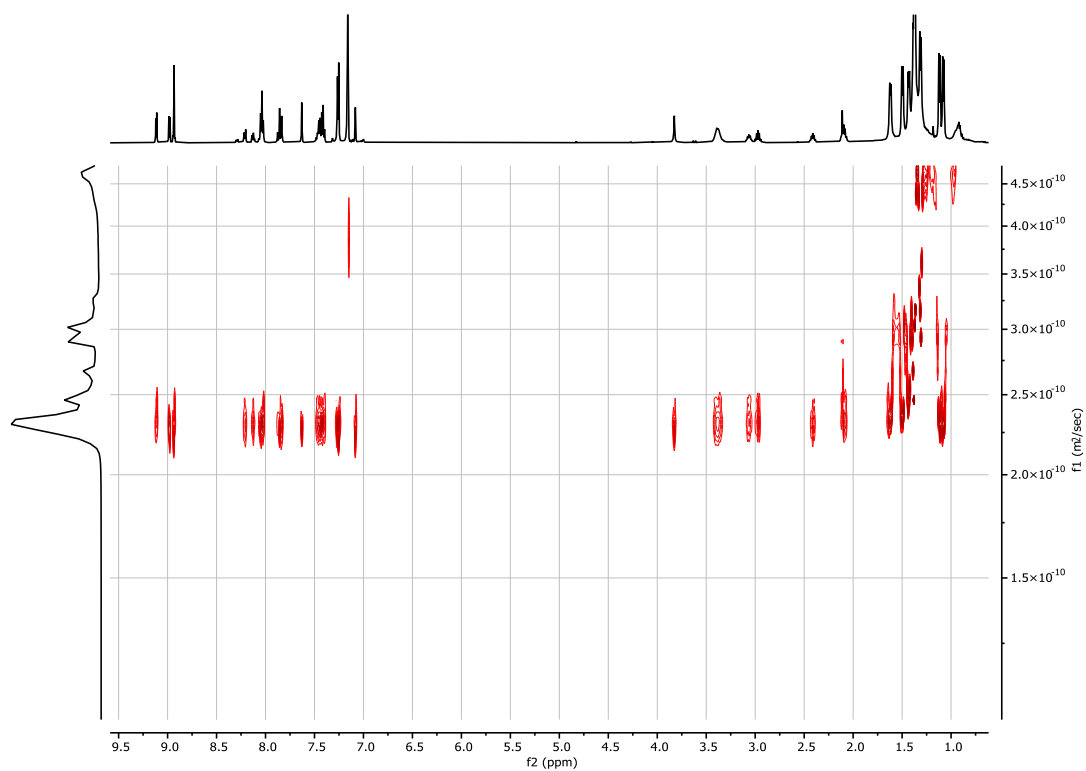

## 2.11 Thermal stability analysis

### 2.11.1 Thermogravimetric analysis (TGA) and melting points

| Compound      | $C5^+BF_4^-$ | $Na^+A5^-$ | <b>3</b> | $C7^+BF_4^-$    | $Na^+A7^-$ | <b>5</b>        |
|---------------|--------------|------------|----------|-----------------|------------|-----------------|
| Melting point | 180 °C       | 211 °C     | 213 °C   | Solid at 300 °C | 285 °C     | Solid at 300 °C |

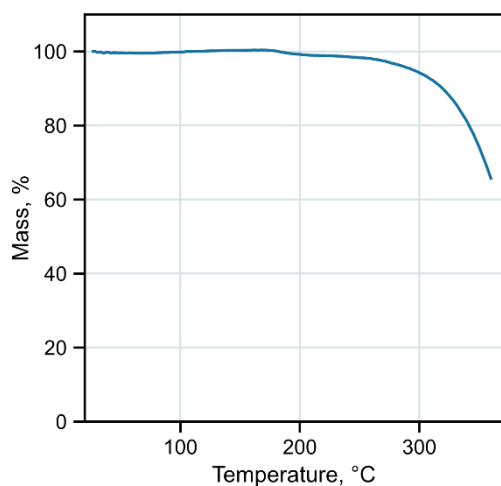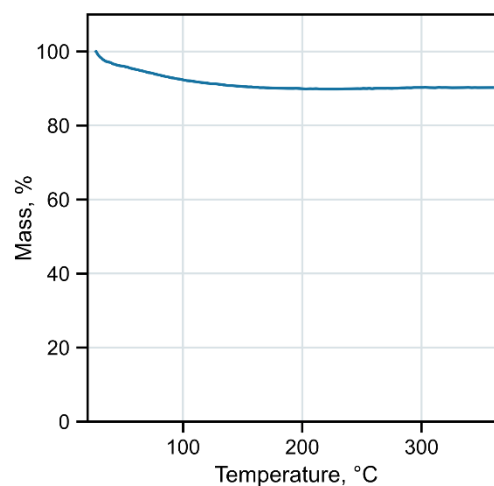

| Compound      | $C10^{3+}(BF_4^-)_3$ | $(Na^+)_3A10^{3-}$ | <b>10</b>       |
|---------------|----------------------|--------------------|-----------------|
| Melting point | Solid at 300 °C      | Solid at 300 °C    | Solid at 300 °C |

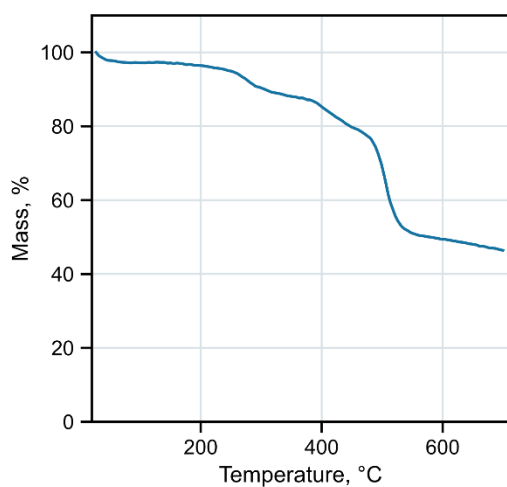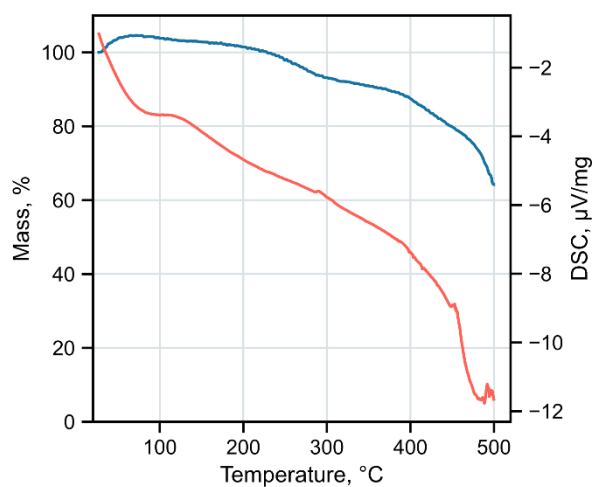



### 2.11.2 NMR studies of thermal stability of **10**

$^1\text{H}$  NMR spectrum ( $\text{CDCl}_3$ , 400 MHz) of  $\text{C10}^{3+}(\text{BF}_4^-)_3$  before heating (blue), and after 1 h at 250 °C (red):

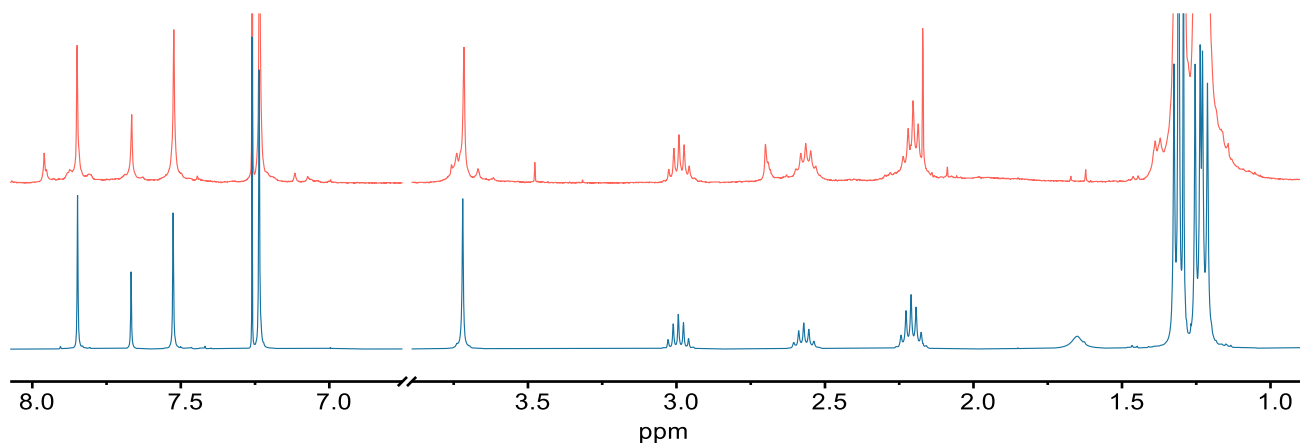

$^1\text{H}$  NMR spectrum ( $\text{CDCl}_3/\text{CD}_3\text{OD}$ , 400 MHz) of  $(\text{Na}^+)_3\text{A10}^{3-}$  before heating (blue), and after 1 h at 250 °C (red):

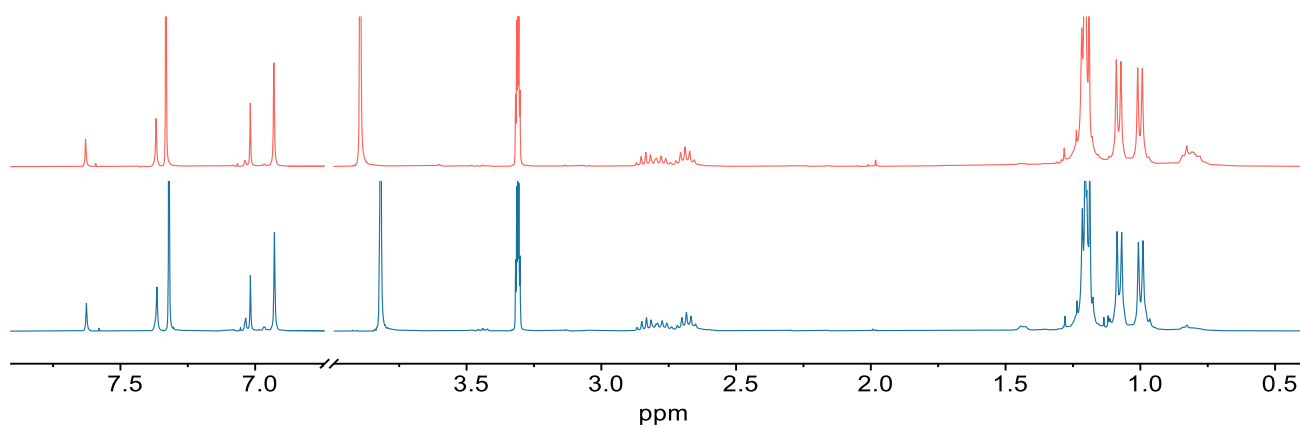

$^1\text{H}$  NMR spectrum ( $\text{CDCl}_3/\text{CD}_3\text{OD}$ , 400 MHz) of **10** before heating (blue), and after 1 h at 250 °C (red):

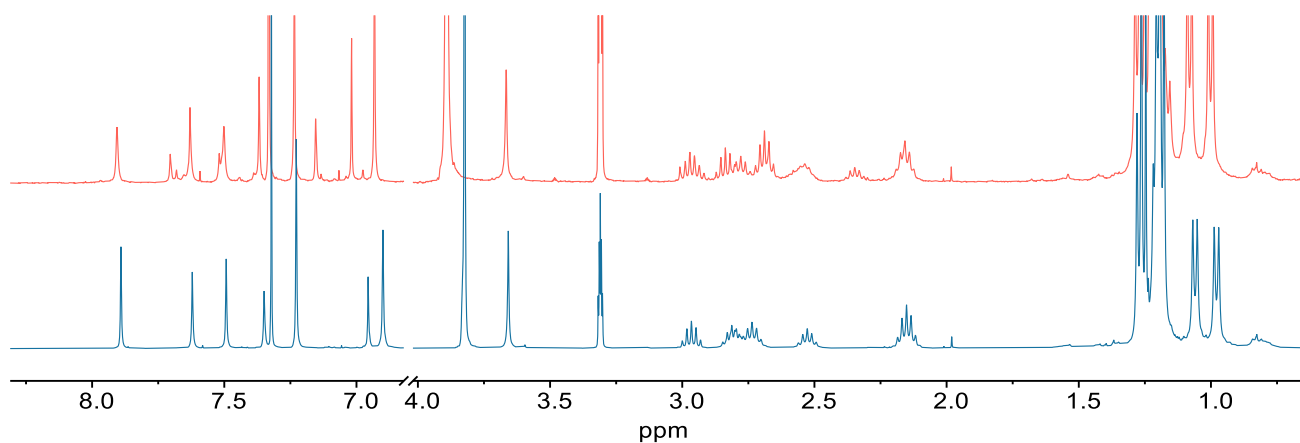

## 2.12 Computational studies

Density functional theory (DFT) calculations were performed using the Gaussian 16 (revision C.01) program.<sup>17</sup> The initial geometries of the cations **C2**<sup>+</sup>, **C3**<sup>+</sup>, **C4**<sup>+</sup> and **C5**<sup>+</sup>, anions **A2**<sup>-</sup>, **A3**<sup>-</sup>, **A4**<sup>-</sup>, **A5**<sup>-</sup>, and pair **3** were taken from the X-ray crystal structures of the corresponding ion pairs **C2**<sup>+</sup>**A4**<sup>-</sup>, **C3**<sup>+</sup>**A3**<sup>-</sup>, **C4**<sup>+</sup>**A2**<sup>-</sup> and **3**. Geometry optimizations were performed at the M06-2X level of theory with the 6-31+G(d,p) basis set in the gas phase. Harmonic vibrational frequencies were evaluated for the optimized geometries, with minima characterized by the absence of imaginary frequencies. Quasiharmonic corrections to the entropy for frequencies below 100 cm<sup>-1</sup> were calculated with the Goodvibes<sup>18</sup> program by employing the method of Grimme.<sup>19</sup> Single point energies were calculated at M06-2X level of theory with the 6-311++G(3df,2p) basis set in the gas phase or with implicit solvation model CPCM.<sup>20,21</sup> The employed level of theory has been used previously for anionic supramolecular systems.<sup>22</sup> The cube files, containing the electrostatic potential and the SCF density data, were generated by a standalone Gaussian utility *cubegen*. The electrostatic potential maps were visualized in VMD.<sup>23</sup> The optimized structures were visualized in CYLView.<sup>24</sup>

|                                                                                    | $\Delta G_{\text{qh}}$ | $G_{\text{qh}}$ | $\Delta G$ | $G$         | $E_{\text{elec}}$ |
|------------------------------------------------------------------------------------|------------------------|-----------------|------------|-------------|-------------------|
| M06-2X/6-311++G(3df,2p)//M06-2X/6-31+G(d,p)                                        |                        |                 |            |             |                   |
| <b>C5</b> <sup>+</sup>                                                             | -                      | -2041.28953     | -          | -2041.30580 | -2042.34402       |
| <b>A5</b> <sup>-</sup>                                                             | -                      | -2608.92386     | -          | -2608.93809 | -2609.95116       |
| <b>3</b>                                                                           | -51.8                  | -4650.29594     | -49.2      | -4650.32232 | -4652.41850       |
| CPCM(benzene)/M06-2X/6-311++G(3df,2p)//M06-2X/6-31+G(d,p)                          |                        |                 |            |             |                   |
| <b>C5</b> <sup>+</sup>                                                             | -                      | -2041.31791     | -          | -2041.33417 | -2042.37239       |
| <b>A5</b> <sup>-</sup>                                                             | -                      | -2608.96744     | -          | -2608.98167 | -2609.99474       |
| <b>3</b>                                                                           | -15.4                  | -4650.30990     | -12.8      | -4650.33628 | -4652.43246       |
| CPCM(CH <sub>2</sub> Cl <sub>2</sub> )/M06-2X/6-311++G(3df,2p)//M06-2X/6-31+G(d,p) |                        |                 |            |             |                   |
| <b>C5</b> <sup>+</sup>                                                             | -                      | -2041.33544     | -          | -2041.35171 | -2042.38993       |
| <b>A5</b> <sup>-</sup>                                                             | -                      | -2608.99711     | -          | -2609.01134 | -2610.02441       |
| <b>3</b>                                                                           | 8.0                    | -4650.31978     | 10.6       | -4650.34617 | -4652.44234       |
| CPCM(H <sub>2</sub> O)/M06-2X/6-311++G(3df,2p)//M06-2X/6-31+G(d,p)                 |                        |                 |            |             |                   |
| <b>C5</b> <sup>+</sup>                                                             | -                      | -2041.34091     | -          | -2041.35718 | -2042.39540       |
| <b>A5</b> <sup>-</sup>                                                             | -                      | -2609.00693     | -          | -2609.02115 | -2610.03422       |
| <b>3</b>                                                                           | 15.5                   | -4650.32312     | 18.1       | -4650.34951 | -4652.44568       |

Electronic and free energies are in Hartree,  $\Delta G$  and  $\Delta G_{\text{qh}}$  values are in kcal/mol and represent the differences in free energies of the ion pair compared with the separated ions,  $\Delta G_{\text{qh}}$  and  $G_{\text{qh}}$  include quasiharmonic corrections to the entropy.

## Energy decomposition analysis

The decomposition analyses of interaction energies were performed using symmetry-adapted perturbation theory (SAPT)<sup>25,26</sup> employing the SAPT0 algorithm<sup>27,28</sup> implemented in the Psi4 software.<sup>29</sup> The total energy ( $E_{\text{total}}$ ) by the SAPT0 analysis is divided into contributions from electrostatics ( $E_{\text{elst}}$ ), induction ( $E_{\text{ind}}$ ), dispersion ( $E_{\text{disp}}$ ), and exchange ( $E_{\text{exch}}$ ). The DFT optimized geometry of **3** was used to generate truncated geometries **3**<sub>truncA-D</sub>. For **3**<sub>truncB</sub>, the SO<sub>3</sub> group was replaced with the H atom, while N-CH<sub>3</sub> group was replaced with a C-H group. The other structures were obtained by replacing the 2,4,6-triisopropylphenyl-substituents at the 2- and 6-positions of the central aromatic rings of both ions (**3**<sub>truncA</sub>), of the anion only (**3**<sub>truncC</sub>), or of the cation only (**3**<sub>truncD</sub>) with H atoms. The truncated geometries **1**<sub>trunc</sub>, **4**<sub>trunc</sub>, and **6**<sub>trunc</sub> were obtained from the X-ray crystal structures of **1**, **4**, and **6**, respectively, by replacing the 2,6-diisopropylphenyl substituents from the 4-positions of the central aromatic rings of the ions with H atoms. Additionally, to reduce the computational time in the case of **6**<sub>trunc</sub>, one of the *p*-<sup>t</sup>Bu-phenyl groups (which points away from the anion) was removed from each of the two shielding groups, and replaced with an H atom. Then, geometry optimizations were performed at the M06-2X/6-31+G(d,p) (for **1**<sub>trunc</sub>) or M06-2X/6-31G(d) (**4**<sub>trunc</sub> and **6**<sub>trunc</sub>) levels of theory. Structures **4**<sub>truncA</sub> and **6**<sub>truncA</sub> were obtained by replacing the substituents at the 2- and 6-positions of the central aromatic rings of **4**<sub>trunc</sub> and **6**<sub>trunc</sub>, respectively, with H atoms. The SAPT0 energy decomposition analyses were then performed with the jun-cc-pVDZ basis set.

The overview of the results of the SAPT calculations:

|                                       | $E_{\text{elst}}$ | $E_{\text{ind}}$ | $E_{\text{exch}}$ | $E_{\text{disp}}$ | $E_{\text{total}}$  |
|---------------------------------------|-------------------|------------------|-------------------|-------------------|---------------------|
| <b>1</b> <sub>trunc</sub>             | -74.80            | -18.73           | 52.42             | -44.48            | -85.59              |
| <b>3</b>                              | -79.96            | -21.04           | 65.44             | -53.91            | -89.46              |
| <b>3</b> <sub>truncA</sub>            | -76.70            | -10.85           | 15.15             | -5.79             | -78.20              |
| <b>3</b> - <b>3</b> <sub>truncA</sub> | -3.26             | -10.19           | 50.29             | -48.12            | <b>-11.26 (13%)</b> |
| <b>3</b> <sub>truncB</sub>            | -12.10            | -3.68            | 37.11             | -38.24            | -16.91              |
| <b>3</b> <sub>truncC</sub>            | -72.52            | -18.64           | 30.74             | -16.44            | -76.87              |
| <b>3</b> <sub>truncD</sub>            | -71.24            | -12.35           | 16.59             | -8.96             | -75.96              |
| <b>4</b> <sub>trunc</sub>             | -76.10            | -19.48           | 57.64             | -50.56            | -88.51              |
| <b>4</b> <sub>truncA</sub>            | -77.73            | -7.73            | 15.25             | -4.74             | -74.96              |
| <b>4</b> - <b>4</b> <sub>truncA</sub> | 1.63              | -11.75           | 42.39             | -45.82            | <b>-13.55 (15%)</b> |
| <b>6</b> <sub>trunc</sub>             | -82.89            | -23.32           | 79.17             | -71.69            | -98.73              |
| <b>6</b> <sub>truncA</sub>            | -75.44            | -7.86            | 13.09             | -4.01             | -74.23              |
| <b>6</b> - <b>6</b> <sub>truncA</sub> | -7.45             | -15.46           | 66.08             | -67.68            | <b>-24.50 (25%)</b> |

All energies are in kcal/mol.

The geometries based on **1**<sub>trunc</sub> with different N...S distances (Figure S2c) were generated by incremental increase of the distance between carbons at the 4-positions of the central arenes of the cation and the anion and were not further optimized. The SAPT0 calculations were performed by using the jun-cc-pVDZ basis set.

| $E_{\text{elst}}$ | $E_{\text{exch}}$ | $E_{\text{disp}}$ | $E_{\text{ind}}$ | $E_{\text{total}}$ | <i>Distance</i> |
|-------------------|-------------------|-------------------|------------------|--------------------|-----------------|
| -74.80            | 52.42             | -44.48            | -18.73           | -85.59             | 4.70            |
| -69.97            | 41.24             | -39.99            | -17.12           | -85.84             | 4.79            |
| -63.02            | 26.12             | -32.57            | -14.58           | -84.05             | 4.98            |
| -58.35            | 17.02             | -26.71            | -12.65           | -80.69             | 5.18            |
| -55.02            | 11.40             | -22.04            | -11.12           | -76.78             | 5.37            |
| -51.41            | 6.48              | -16.68            | -9.30            | -70.90             | 5.66            |
| -47.18            | 2.59              | -10.70            | -7.05            | -62.34             | 6.14            |
| -44.03            | 0.98              | -7.03             | -5.44            | -55.51             | 6.63            |
| -41.47            | 0.34              | -4.71             | -4.25            | -50.09             | 7.12            |
| -39.26            | 0.11              | -3.23             | -3.37            | -45.76             | 7.61            |
| -37.30            | 0.03              | -2.27             | -2.70            | -42.24             | 8.11            |
| -35.52            | 0.01              | -1.63             | -2.18            | -39.32             | 8.60            |
| -33.90            | 0.00              | -1.19             | -1.79            | -36.87             | 9.09            |
| -32.40            | 0.00              | -0.88             | -1.47            | -34.76             | 9.59            |
| -31.03            | 0.00              | -0.67             | -1.23            | -32.92             | 10.08           |
| -29.75            | 0.00              | -0.51             | -1.03            | -31.29             | 10.58           |
| -28.57            | 0.00              | -0.40             | -0.87            | -29.83             | 11.07           |
| -27.47            | 0.00              | -0.31             | -0.74            | -28.52             | 11.57           |

All energies are in kcal/mol, distances are in Å.

The geometries of the model systems shown in Figure S2d for ionic, hydrogen, and halogen bonds were generated using a coordinate scan (the distance between carbon atoms at the 4-positions of the aromatic groups was increased in 0.1 Å steps) in Gaussian 16 and are optimized with the distance constraint at the M06-2X/6-31+G(d,p) level of theory with the LANL2DZ basis set with the ECP being used for the iodine atom.<sup>30-33</sup> The SAPTO calculations were performed by using the jun-cc-pVDZ basis set for the ionic and hydrogen-bonded systems, while for the halogen-bonded system, aug-cc-pVDZ and aug-cc-pVDZ-PP (for the I atom) were used. The distances used for the graphs are: between nitrogen and sulfur atoms for the ionic bond, between nitrogen and hydrogen (of the -OH group) atoms for the hydrogen-bond, and between nitrogen and iodine atoms for the halogen-bonded system.

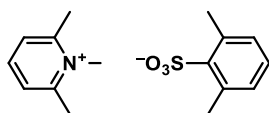

| $E_{\text{elst}}$ | $E_{\text{exch}}$ | $E_{\text{disp}}$ | $E_{\text{ind}}$ | $E_{\text{total}}$ | <i>Distance</i> |
|-------------------|-------------------|-------------------|------------------|--------------------|-----------------|
| -86.41            | 25.07             | -8.44             | -12.26           | -82.03             | 4.39            |
| -85.34            | 23.08             | -8.03             | -11.79           | -82.07             | 4.41            |
| -83.91            | 20.71             | -7.54             | -11.23           | -81.97             | 4.44            |
| -82.31            | 18.27             | -7.01             | -10.64           | -81.70             | 4.48            |
| -80.68            | 15.99             | -6.48             | -10.04           | -81.21             | 4.52            |
| -78.98            | 13.87             | -5.94             | -9.43            | -80.48             | 4.56            |
| -77.24            | 11.96             | -5.41             | -8.84            | -79.53             | 4.61            |
| -75.66            | 10.47             | -4.94             | -8.29            | -78.42             | 4.66            |

---

|        |      |       |       |        |      |
|--------|------|-------|-------|--------|------|
| -74.22 | 9.31 | -4.52 | -7.79 | -77.23 | 4.72 |
| -72.70 | 8.02 | -4.10 | -7.31 | -76.09 | 4.78 |
| -71.24 | 6.84 | -3.70 | -6.84 | -74.94 | 4.84 |
| -69.78 | 5.71 | -3.30 | -6.36 | -73.74 | 4.91 |
| -68.01 | 4.24 | -2.87 | -5.85 | -72.49 | 5.00 |
| -66.31 | 3.09 | -2.47 | -5.38 | -71.07 | 5.10 |
| -64.70 | 2.20 | -2.13 | -4.93 | -69.56 | 5.20 |
| -63.17 | 1.55 | -1.83 | -4.53 | -67.99 | 5.30 |
| -61.76 | 1.09 | -1.58 | -4.17 | -66.42 | 5.40 |
| -60.44 | 0.76 | -1.37 | -3.85 | -64.89 | 5.51 |
| -59.20 | 0.53 | -1.19 | -3.56 | -63.41 | 5.61 |
| -58.04 | 0.37 | -1.04 | -3.30 | -62.01 | 5.71 |
| -56.94 | 0.26 | -0.91 | -3.07 | -60.66 | 5.82 |
| -55.90 | 0.19 | -0.80 | -2.86 | -59.38 | 5.92 |
| -54.90 | 0.13 | -0.71 | -2.67 | -58.15 | 6.02 |
| -53.95 | 0.09 | -0.63 | -2.50 | -56.99 | 6.13 |
| -53.04 | 0.07 | -0.56 | -2.34 | -55.87 | 6.23 |
| -52.16 | 0.05 | -0.50 | -2.19 | -54.81 | 6.33 |
| -51.31 | 0.03 | -0.45 | -2.06 | -53.78 | 6.43 |
| -50.49 | 0.02 | -0.41 | -1.94 | -52.81 | 6.53 |
| -49.70 | 0.02 | -0.37 | -1.82 | -51.88 | 6.64 |
| -48.94 | 0.01 | -0.33 | -1.72 | -50.98 | 6.74 |
| -48.20 | 0.01 | -0.30 | -1.62 | -50.11 | 6.84 |
| -47.49 | 0.01 | -0.27 | -1.53 | -49.28 | 6.94 |
| -46.80 | 0.00 | -0.25 | -1.45 | -48.49 | 7.04 |
| -46.13 | 0.00 | -0.23 | -1.37 | -47.72 | 7.14 |
| -45.47 | 0.00 | -0.21 | -1.29 | -46.97 | 7.25 |
| -44.84 | 0.00 | -0.19 | -1.23 | -46.26 | 7.35 |
| -44.23 | 0.00 | -0.17 | -1.16 | -45.57 | 7.45 |
| -43.63 | 0.00 | -0.16 | -1.10 | -44.90 | 7.55 |
| -43.05 | 0.00 | -0.15 | -1.05 | -44.25 | 7.65 |
| -42.49 | 0.00 | -0.14 | -1.00 | -43.62 | 7.75 |
| -41.94 | 0.00 | -0.13 | -0.95 | -43.01 | 7.85 |
| -41.41 | 0.00 | -0.12 | -0.90 | -42.43 | 7.95 |
| -40.88 | 0.00 | -0.11 | -0.86 | -41.85 | 8.05 |
| -40.38 | 0.00 | -0.10 | -0.82 | -41.30 | 8.16 |
| -39.88 | 0.00 | -0.09 | -0.78 | -40.76 | 8.26 |
| -39.40 | 0.00 | -0.09 | -0.75 | -40.23 | 8.36 |
| -38.93 | 0.00 | -0.08 | -0.71 | -39.72 | 8.46 |
| -38.47 | 0.00 | -0.08 | -0.68 | -39.23 | 8.56 |
| -38.02 | 0.00 | -0.07 | -0.65 | -38.75 | 8.66 |
| -37.58 | 0.00 | -0.07 | -0.63 | -38.27 | 8.76 |
| -37.16 | 0.00 | -0.06 | -0.60 | -37.82 | 8.86 |
| -36.74 | 0.00 | -0.06 | -0.57 | -37.37 | 8.96 |

---

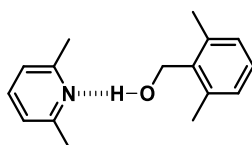

| $E_{elst}$ | $E_{exch}$ | $E_{disp}$ | $E_{ind}$ | $E_{total}$ | <i>Distance</i> |
|------------|------------|------------|-----------|-------------|-----------------|
| -15.04     | 17.31      | -6.56      | -5.54     | -9.82       | 1.88            |
| -14.62     | 16.47      | -6.26      | -5.37     | -9.78       | 1.89            |
| -13.86     | 14.99      | -5.81      | -5.02     | -9.70       | 1.91            |
| -12.98     | 13.24      | -5.25      | -4.60     | -9.59       | 1.94            |
| -11.61     | 10.93      | -4.68      | -3.91     | -9.28       | 2.00            |
| -10.23     | 8.73       | -4.14      | -3.23     | -8.87       | 2.07            |
| -8.91      | 6.78       | -3.64      | -2.62     | -8.38       | 2.14            |
| -7.73      | 5.16       | -3.18      | -2.09     | -7.84       | 2.23            |
| -6.65      | 3.82       | -2.77      | -1.64     | -7.24       | 2.32            |
| -5.71      | 2.78       | -2.40      | -1.28     | -6.62       | 2.42            |
| -4.91      | 1.99       | -2.08      | -1.00     | -6.00       | 2.53            |
| -4.23      | 1.40       | -1.80      | -0.77     | -5.40       | 2.63            |
| -3.66      | 0.98       | -1.56      | -0.60     | -4.84       | 2.75            |
| -3.18      | 0.68       | -1.36      | -0.47     | -4.32       | 2.86            |
| -2.79      | 0.48       | -1.19      | -0.37     | -3.87       | 2.97            |
| -2.46      | 0.33       | -1.04      | -0.30     | -3.47       | 3.08            |
| -2.19      | 0.23       | -0.92      | -0.24     | -3.11       | 3.19            |
| -1.95      | 0.16       | -0.81      | -0.20     | -2.80       | 3.30            |
| -1.76      | 0.12       | -0.72      | -0.17     | -2.53       | 3.40            |
| -1.59      | 0.08       | -0.65      | -0.14     | -2.29       | 3.51            |
| -1.44      | 0.06       | -0.58      | -0.12     | -2.08       | 3.62            |
| -1.31      | 0.04       | -0.52      | -0.10     | -1.89       | 3.72            |
| -1.19      | 0.03       | -0.47      | -0.09     | -1.72       | 3.83            |
| -1.09      | 0.02       | -0.42      | -0.07     | -1.57       | 3.93            |
| -1.00      | 0.01       | -0.38      | -0.06     | -1.44       | 4.04            |
| -0.92      | 0.01       | -0.35      | -0.06     | -1.32       | 4.14            |
| -0.85      | 0.01       | -0.32      | -0.05     | -1.21       | 4.24            |
| -0.79      | 0.01       | -0.29      | -0.04     | -1.12       | 4.35            |
| -0.73      | 0.00       | -0.26      | -0.04     | -1.03       | 4.45            |
| -0.68      | 0.00       | -0.24      | -0.03     | -0.95       | 4.56            |
| -0.63      | 0.00       | -0.22      | -0.03     | -0.88       | 4.66            |
| -0.59      | 0.00       | -0.20      | -0.03     | -0.82       | 4.76            |
| -0.55      | 0.00       | -0.19      | -0.02     | -0.76       | 4.87            |
| -0.51      | 0.00       | -0.17      | -0.02     | -0.71       | 4.97            |
| -0.48      | 0.00       | -0.16      | -0.02     | -0.66       | 5.07            |
| -0.45      | 0.00       | -0.15      | -0.02     | -0.62       | 5.18            |
| -0.42      | 0.00       | -0.14      | -0.02     | -0.58       | 5.28            |
| -0.40      | 0.00       | -0.13      | -0.01     | -0.54       | 5.38            |
| -0.38      | 0.00       | -0.12      | -0.01     | -0.51       | 5.49            |
| -0.35      | 0.00       | -0.11      | -0.01     | -0.48       | 5.59            |
| -0.34      | 0.00       | -0.10      | -0.01     | -0.45       | 5.69            |
| -0.32      | 0.00       | -0.09      | -0.01     | -0.42       | 5.79            |

|       |      |       |       |       |      |
|-------|------|-------|-------|-------|------|
| -0.30 | 0.00 | -0.09 | -0.01 | -0.40 | 5.90 |
| -0.28 | 0.00 | -0.08 | -0.01 | -0.37 | 6.00 |
| -0.27 | 0.00 | -0.08 | -0.01 | -0.35 | 6.10 |

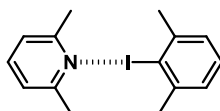

| $E_{\text{elst}}$ | $E_{\text{exch}}$ | $E_{\text{disp}}$ | $E_{\text{ind}}$ | $E_{\text{total}}$ | <i>Distance</i> |
|-------------------|-------------------|-------------------|------------------|--------------------|-----------------|
| -7.71             | 12.05             | -7.48             | -2.67            | -5.81              | 3.12            |
| -6.74             | 10.23             | -6.89             | -2.32            | -5.72              | 3.18            |
| -5.47             | 7.92              | -6.11             | -1.85            | -5.50              | 3.27            |
| -4.40             | 6.06              | -5.40             | -1.46            | -5.20              | 3.36            |
| -3.62             | 4.63              | -4.69             | -1.15            | -4.83              | 3.46            |
| -2.92             | 3.48              | -4.13             | -0.91            | -4.47              | 3.56            |
| -2.34             | 2.59              | -3.63             | -0.71            | -4.09              | 3.66            |
| -1.88             | 1.92              | -3.19             | -0.56            | -3.71              | 3.76            |
| -1.52             | 1.43              | -2.81             | -0.44            | -3.35              | 3.86            |
| -1.23             | 1.05              | -2.48             | -0.35            | -3.01              | 3.96            |
| -1.00             | 0.77              | -2.18             | -0.28            | -2.70              | 4.07            |
| -0.81             | 0.57              | -1.93             | -0.23            | -2.41              | 4.17            |
| -0.67             | 0.41              | -1.71             | -0.19            | -2.15              | 4.27            |
| -0.55             | 0.30              | -1.52             | -0.15            | -1.92              | 4.37            |
| -0.45             | 0.23              | -1.36             | -0.13            | -1.71              | 4.48            |
| -0.38             | 0.16              | -1.21             | -0.10            | -1.52              | 4.58            |
| -0.31             | 0.12              | -1.08             | -0.09            | -1.36              | 4.68            |
| -0.26             | 0.09              | -0.97             | -0.07            | -1.21              | 4.78            |
| -0.21             | 0.07              | -0.87             | -0.06            | -1.08              | 4.88            |
| -0.17             | 0.05              | -0.79             | -0.05            | -0.96              | 4.99            |
| -0.14             | 0.05              | -0.73             | -0.04            | -0.87              | 5.12            |
| -0.11             | 0.05              | -0.68             | -0.04            | -0.78              | 5.25            |
| -0.08             | 0.04              | -0.63             | -0.03            | -0.70              | 5.37            |
| -0.06             | 0.07              | -0.65             | -0.02            | -0.66              | 5.61            |
| -0.03             | 0.12              | -0.75             | -0.02            | -0.67              | 6.30            |
| -0.02             | 0.09              | -0.65             | -0.01            | -0.60              | 6.37            |
| 0.01              | 0.07              | -0.62             | -0.01            | -0.55              | 6.49            |
| 0.02              | 0.05              | -0.55             | -0.01            | -0.50              | 6.60            |
| 0.02              | 0.03              | -0.49             | -0.01            | -0.45              | 6.70            |
| 0.02              | 0.02              | -0.44             | -0.01            | -0.40              | 6.78            |
| 0.02              | 0.02              | -0.40             | 0.00             | -0.36              | 6.88            |
| 0.03              | 0.01              | -0.36             | 0.00             | -0.32              | 6.98            |
| 0.00              | 0.01              | -0.27             | 0.00             | -0.26              | 7.14            |
| 0.01              | 0.01              | -0.26             | 0.00             | -0.25              | 7.21            |
| 0.01              | 0.00              | -0.24             | 0.00             | -0.23              | 7.29            |
| 0.01              | 0.00              | -0.20             | 0.00             | -0.19              | 7.44            |

All energies are in kcal/mol, distances are in Å.

### 3 Supplementary Data

#### 3.1 NMR spectra

$^1\text{H}$  NMR (400 MHz,  $\text{CDCl}_3$ ) of **C2\_N**

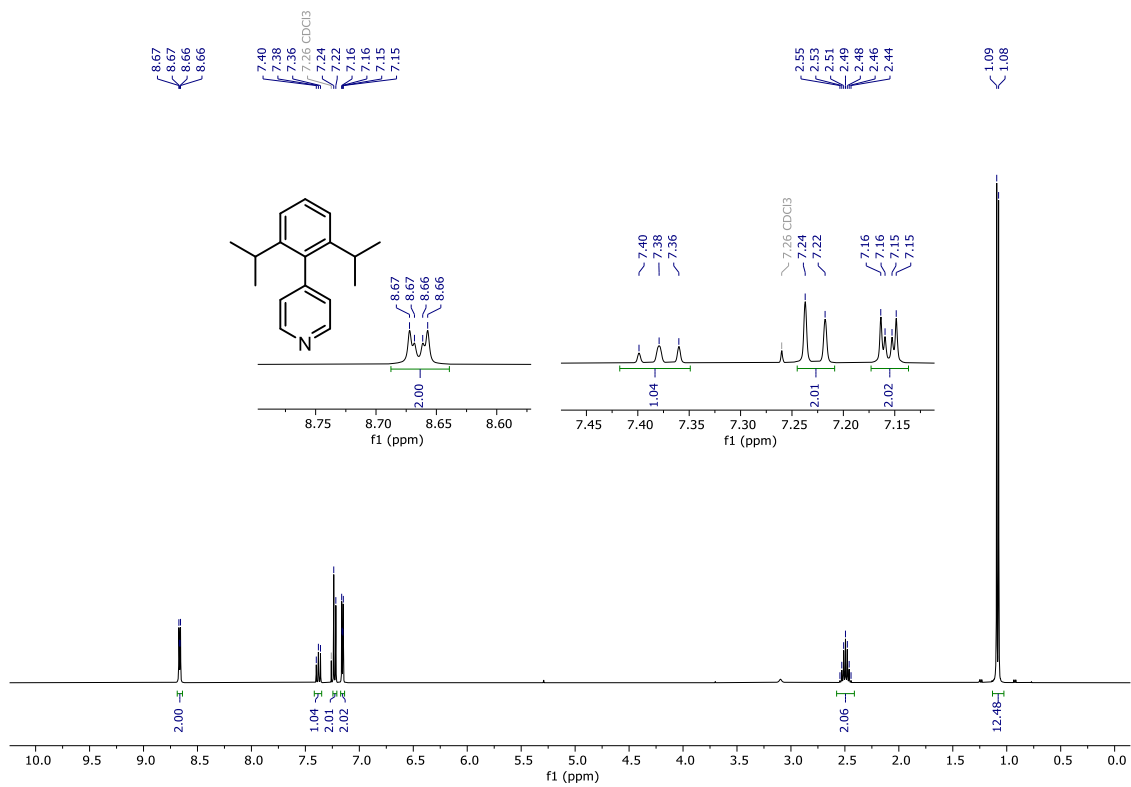

$^{13}\text{C}$  NMR (101 MHz,  $\text{CDCl}_3$ ) of **C2\_N**

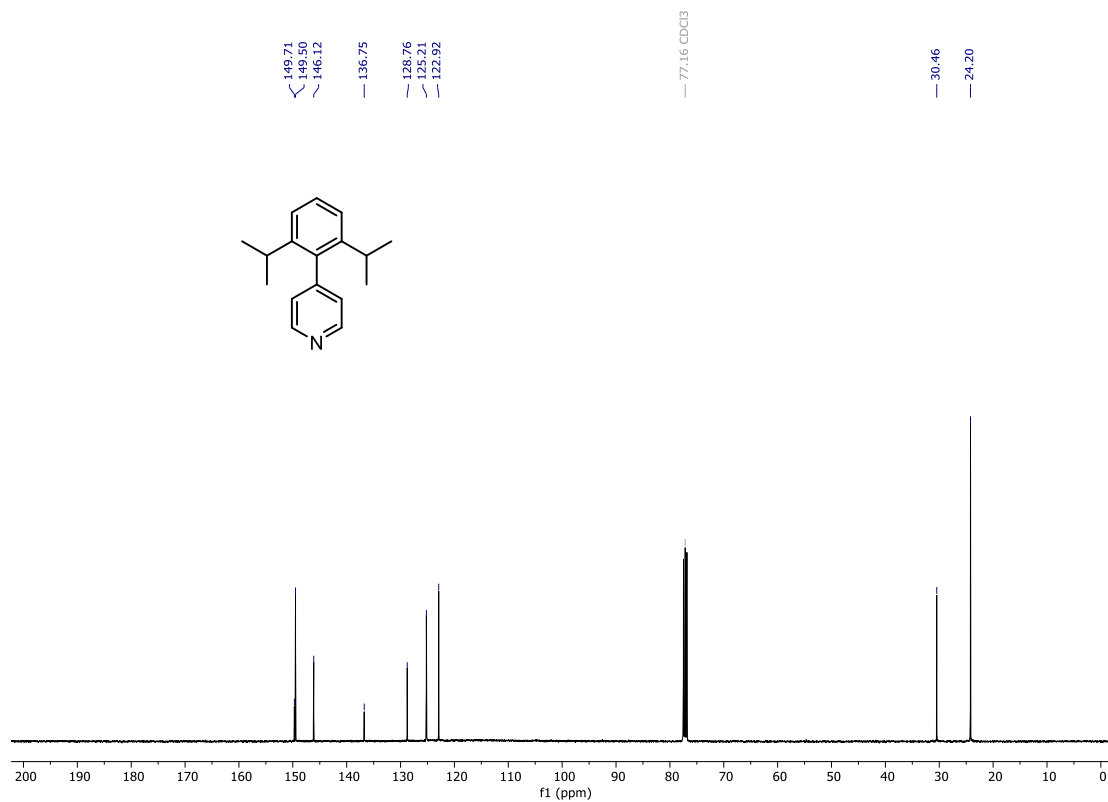



$^1\text{H}$  NMR (400 MHz,  $\text{CDCl}_3$ ) of  $\text{C2}^+\text{BF}_4^-$

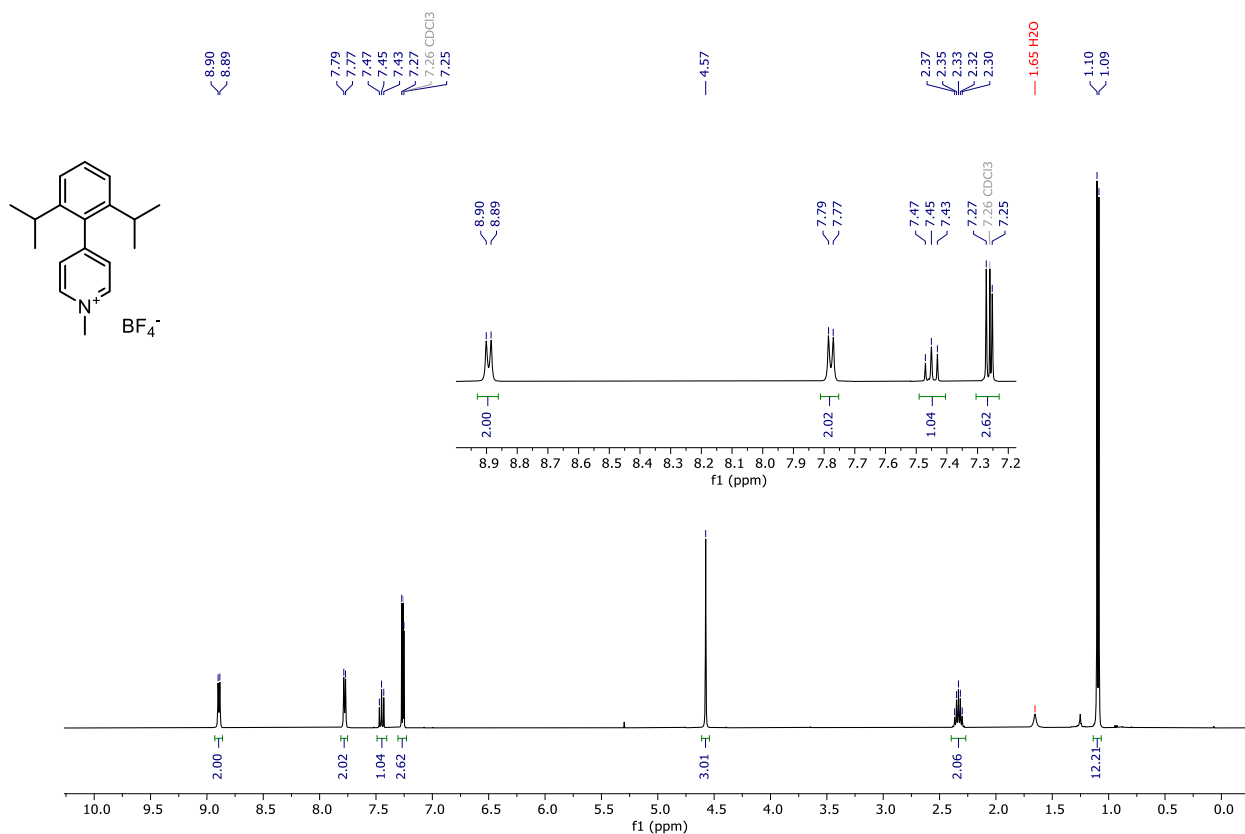

$^{13}\text{C}$  NMR (101 MHz,  $\text{CDCl}_3$ ) of  $\text{C2}^+\text{BF}_4^-$

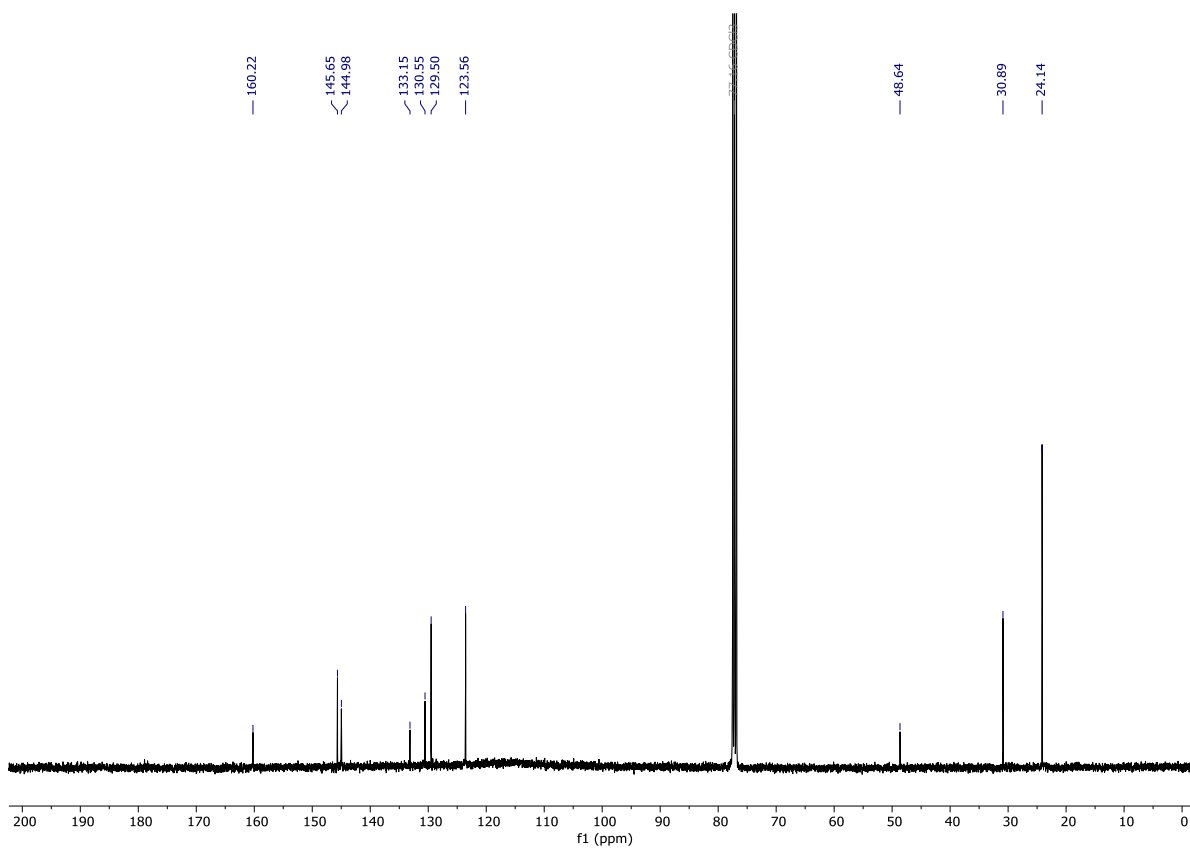

$^{19}\text{F}$  NMR (376 MHz,  $\text{CDCl}_3$ ) of  $\text{C}_2^+\text{BF}_4^-$

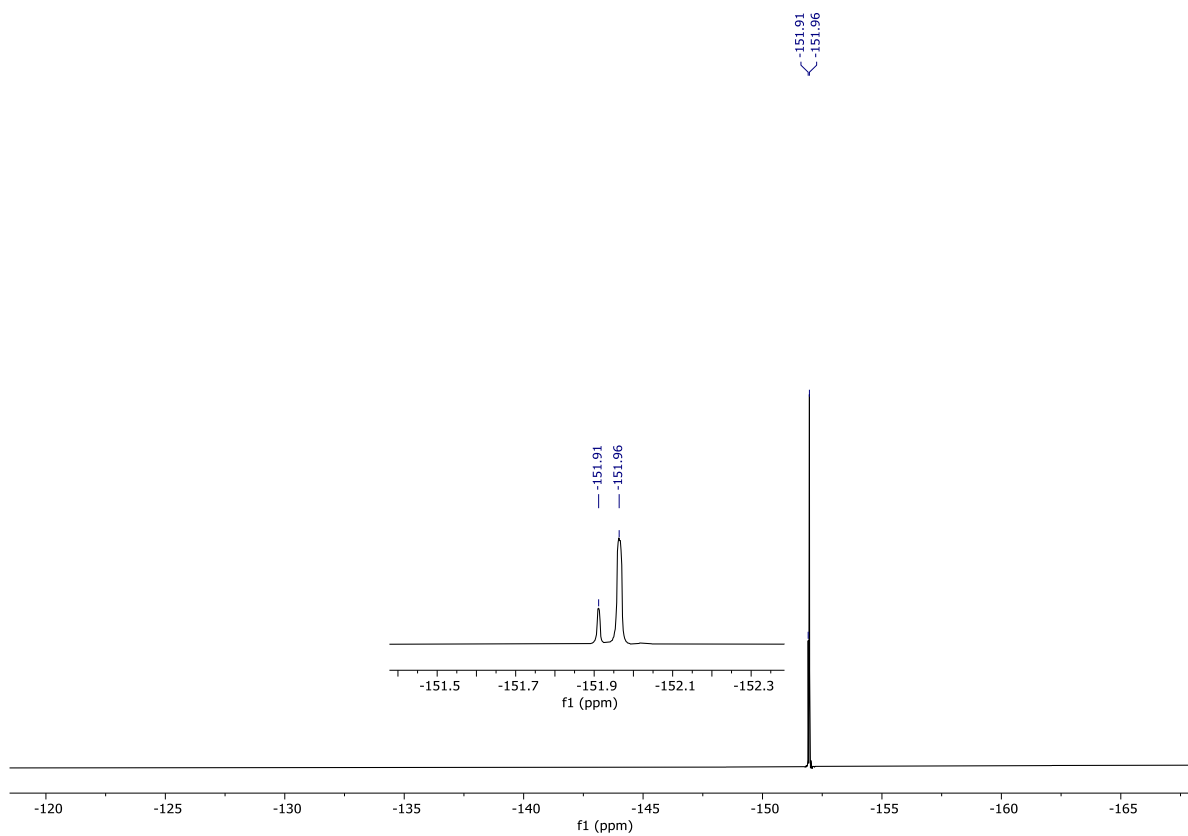

<sup>1</sup>H NMR (400 MHz, CDCl<sub>3</sub>) of C3\_N

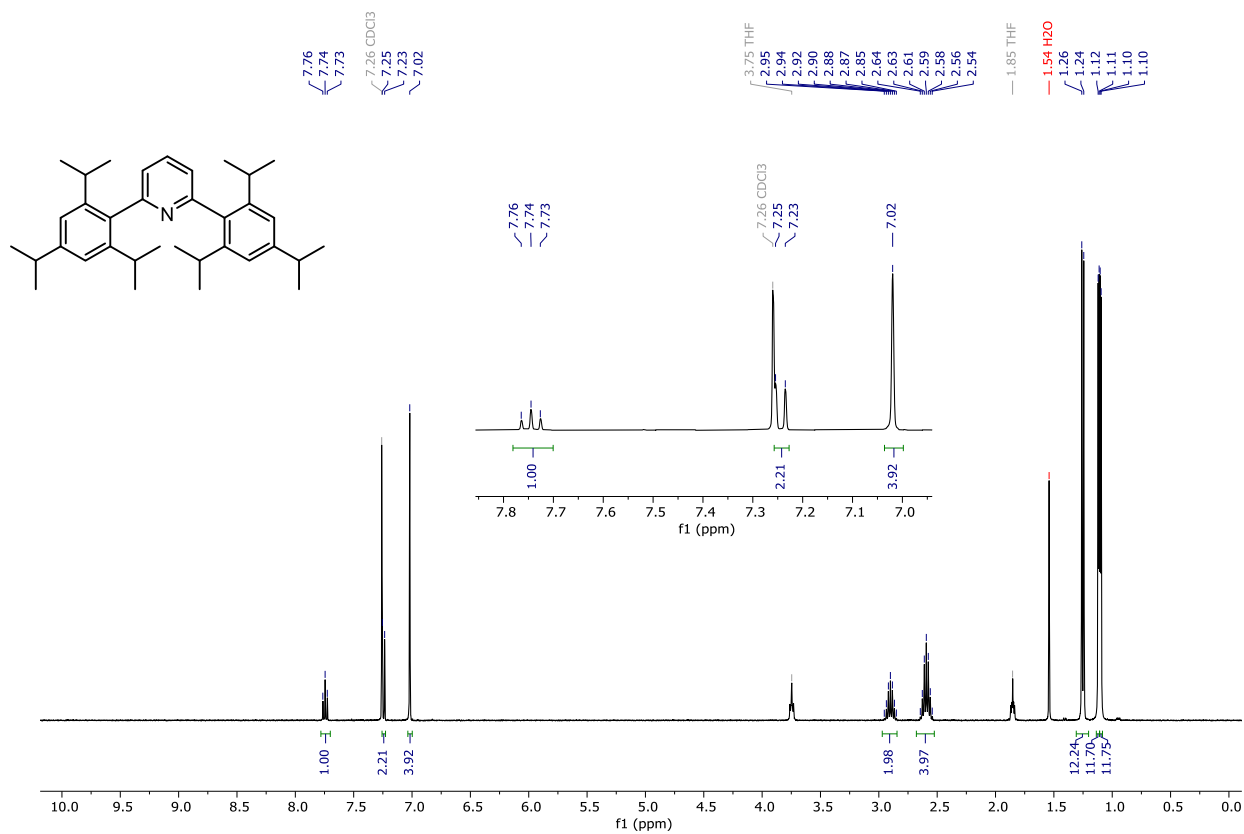

<sup>13</sup>C NMR (101 MHz, CDCl<sub>3</sub>) of C3\_N

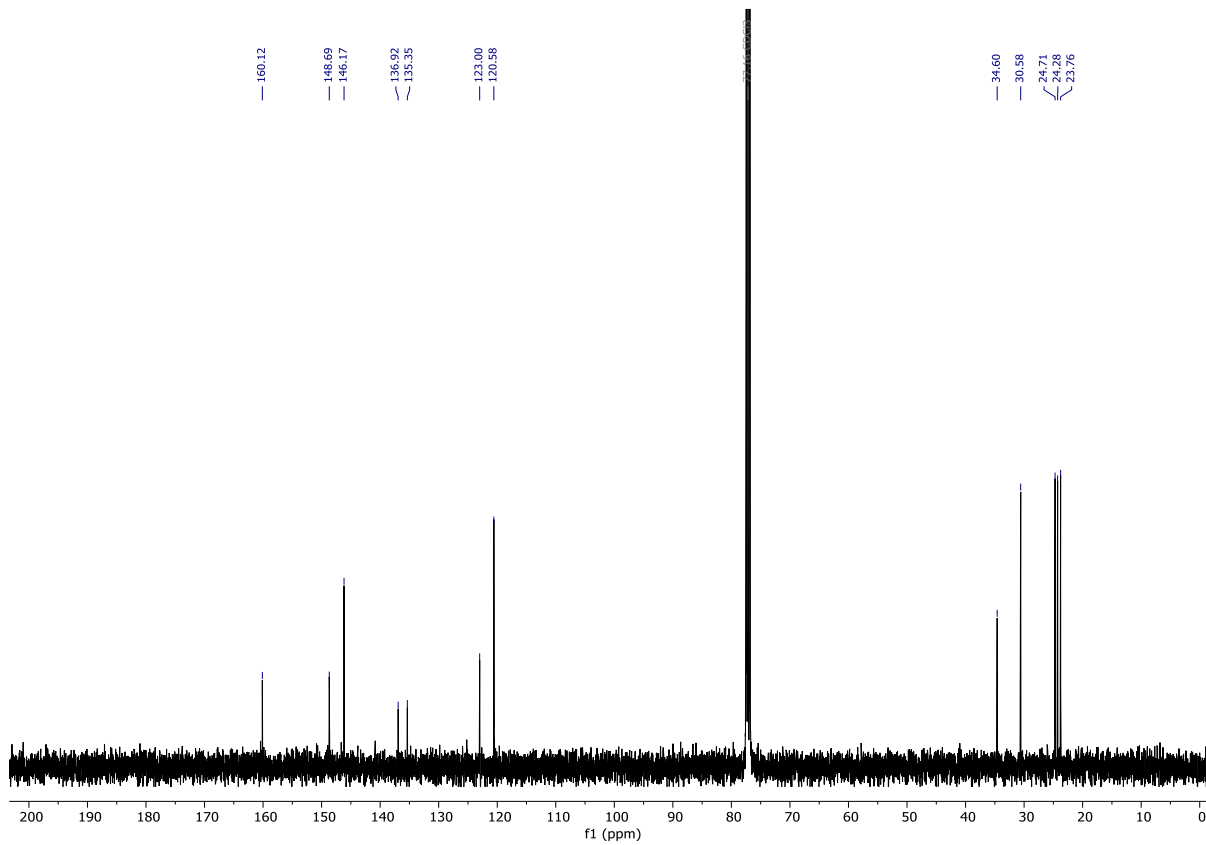

$^1\text{H}$  NMR (400 MHz,  $\text{CDCl}_3$ ) of  $\text{C3}^+\text{BF}_4^-$

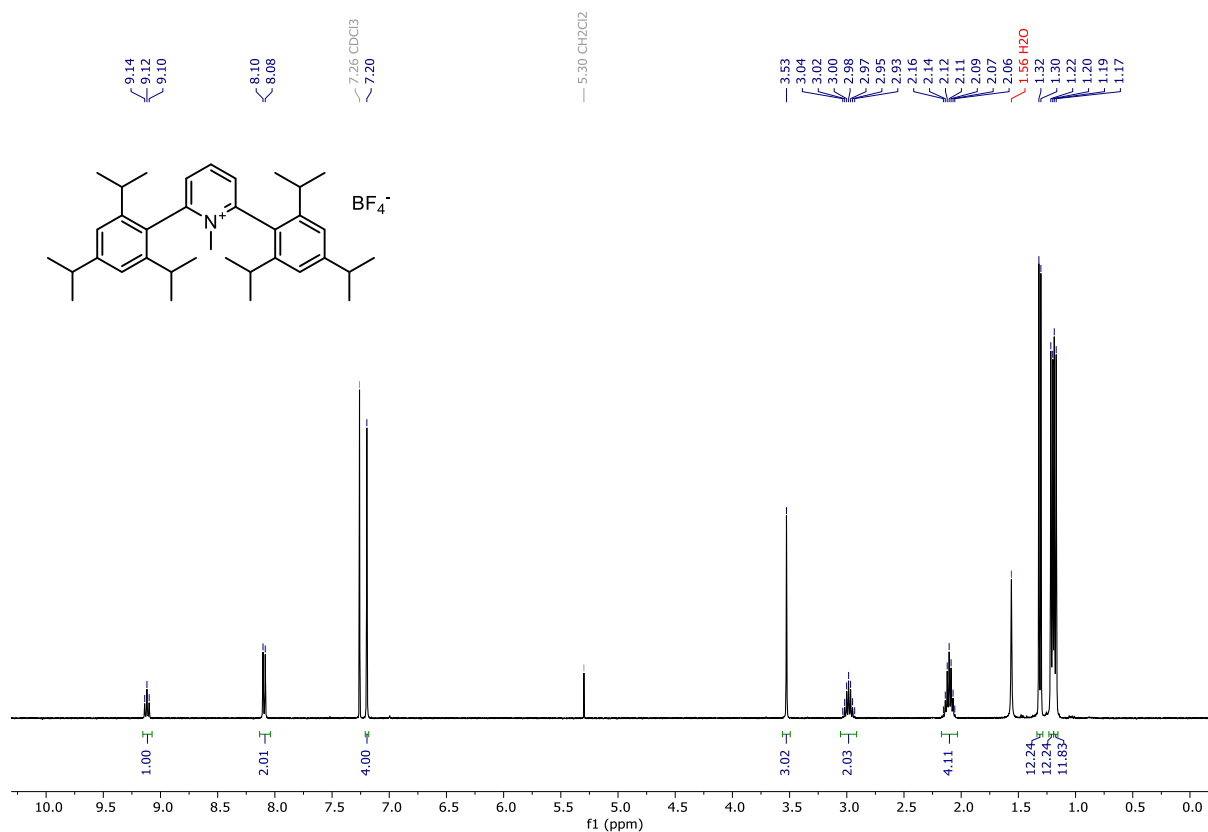

$^{13}\text{C}$  NMR (101 MHz,  $\text{CDCl}_3$ ) of  $\text{C3}^+\text{BF}_4^-$

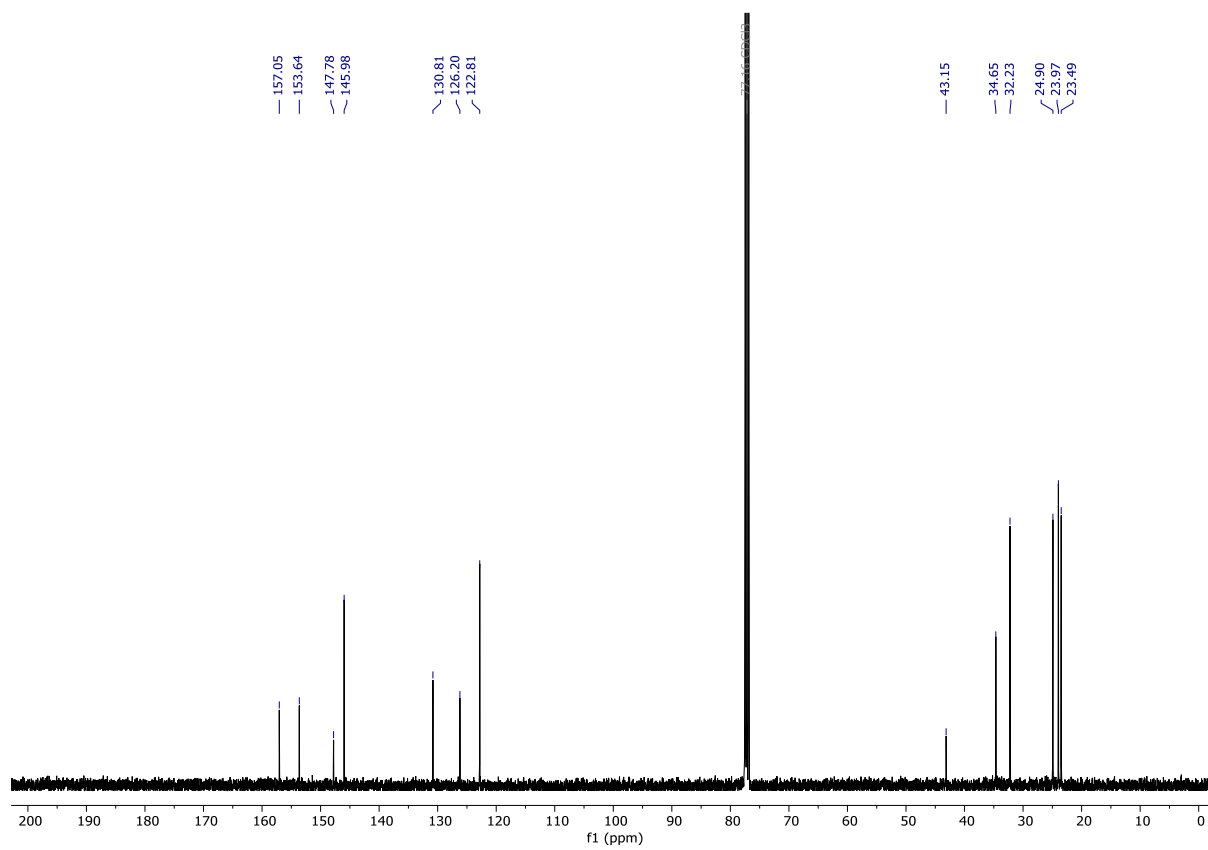

$^{19}\text{F}$  NMR (376 MHz,  $\text{CDCl}_3$ ) of  $\text{C}_3^+\text{BF}_4^-$

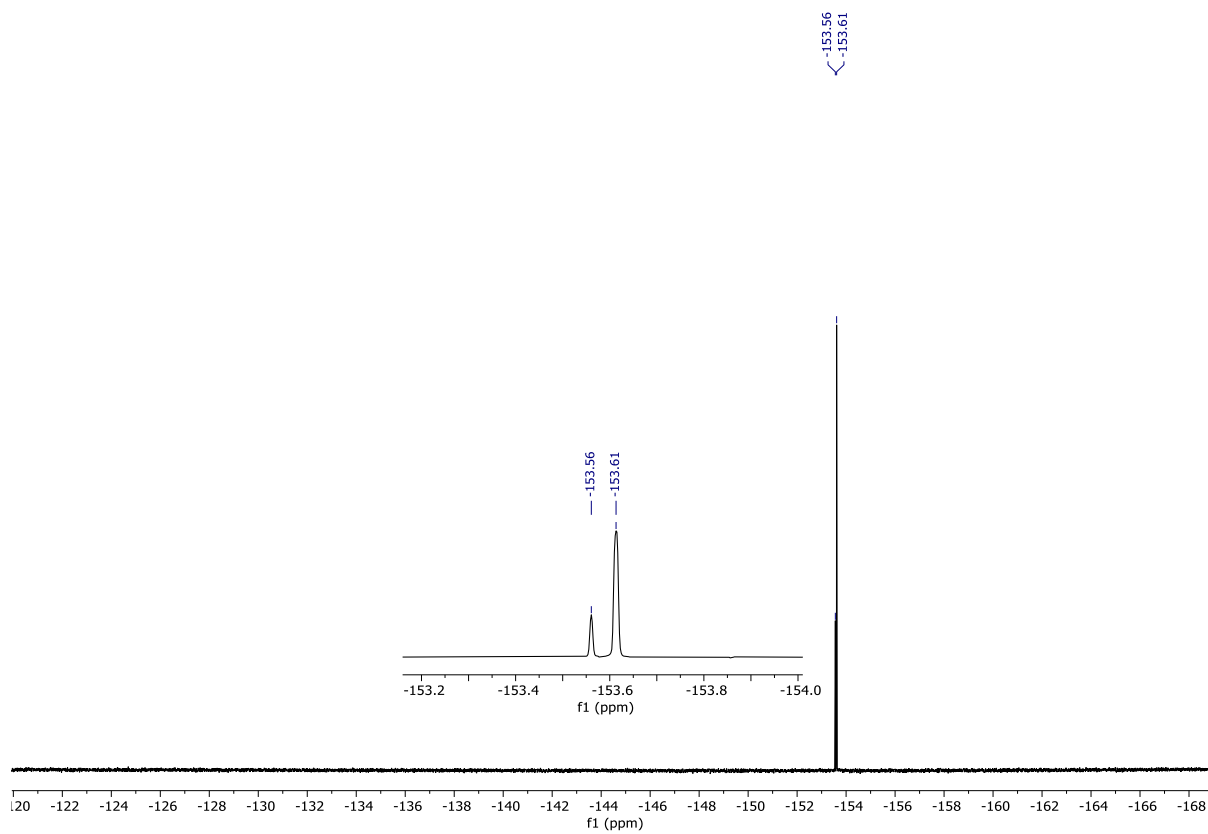

<sup>1</sup>H NMR (400 MHz, CDCl<sub>3</sub>) of A2\_Br

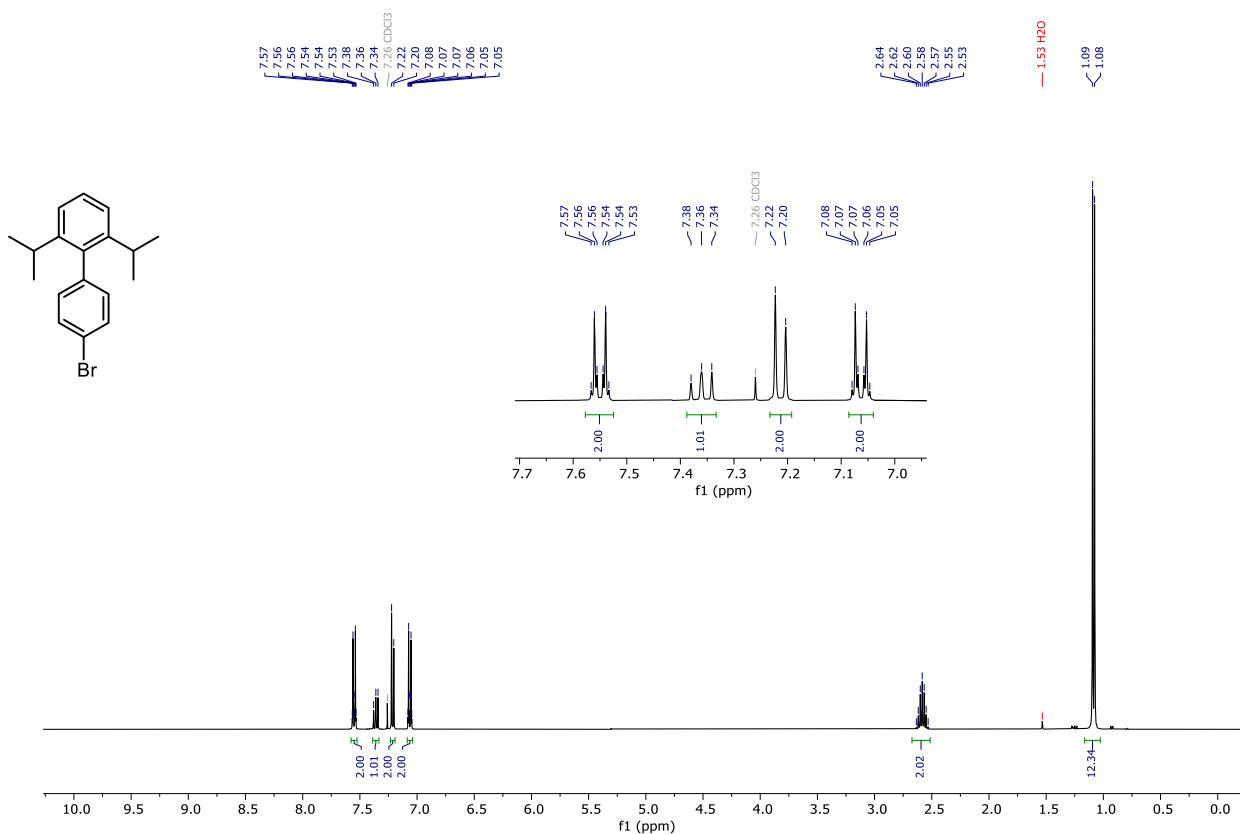

<sup>13</sup>C NMR (101 MHz, CDCl<sub>3</sub>) of A2\_Br

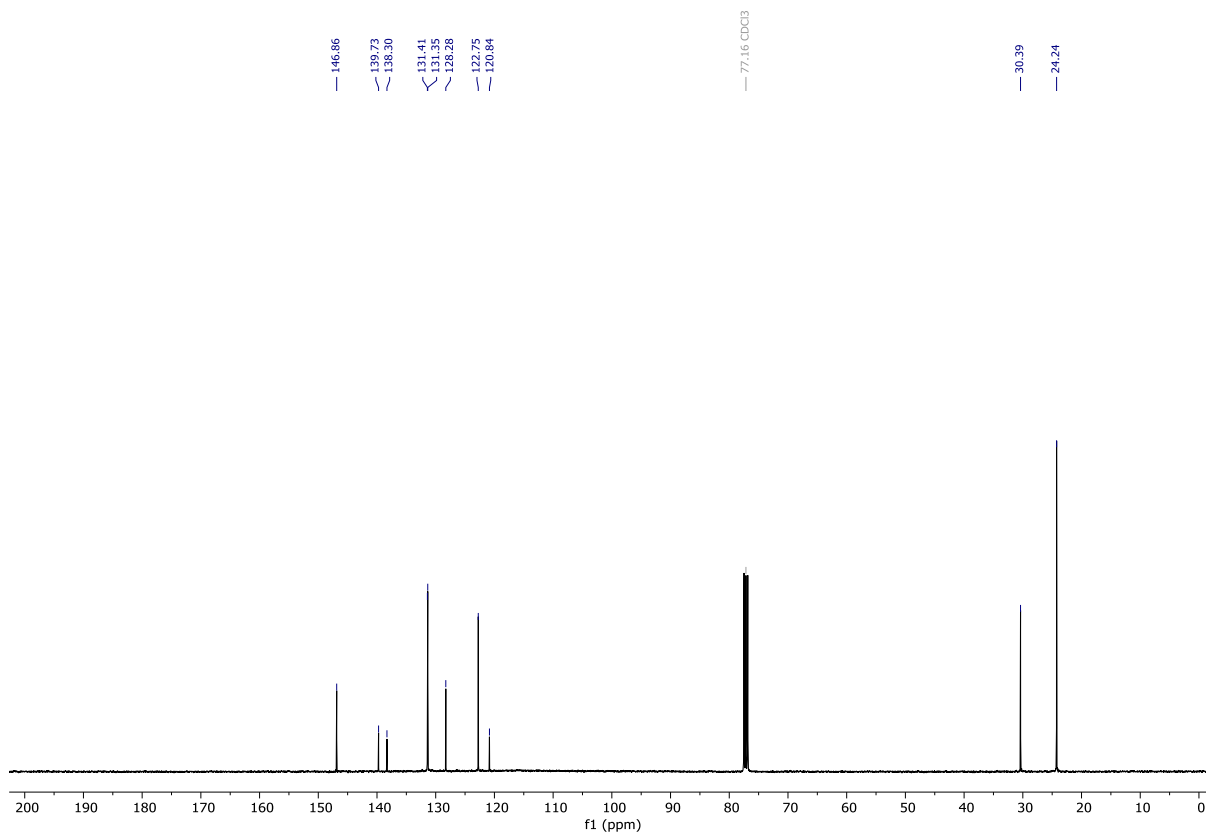

$^1\text{H}$  NMR (400 MHz,  $\text{CDCl}_3$ ) of **A2\_SO<sub>2</sub>Cl**

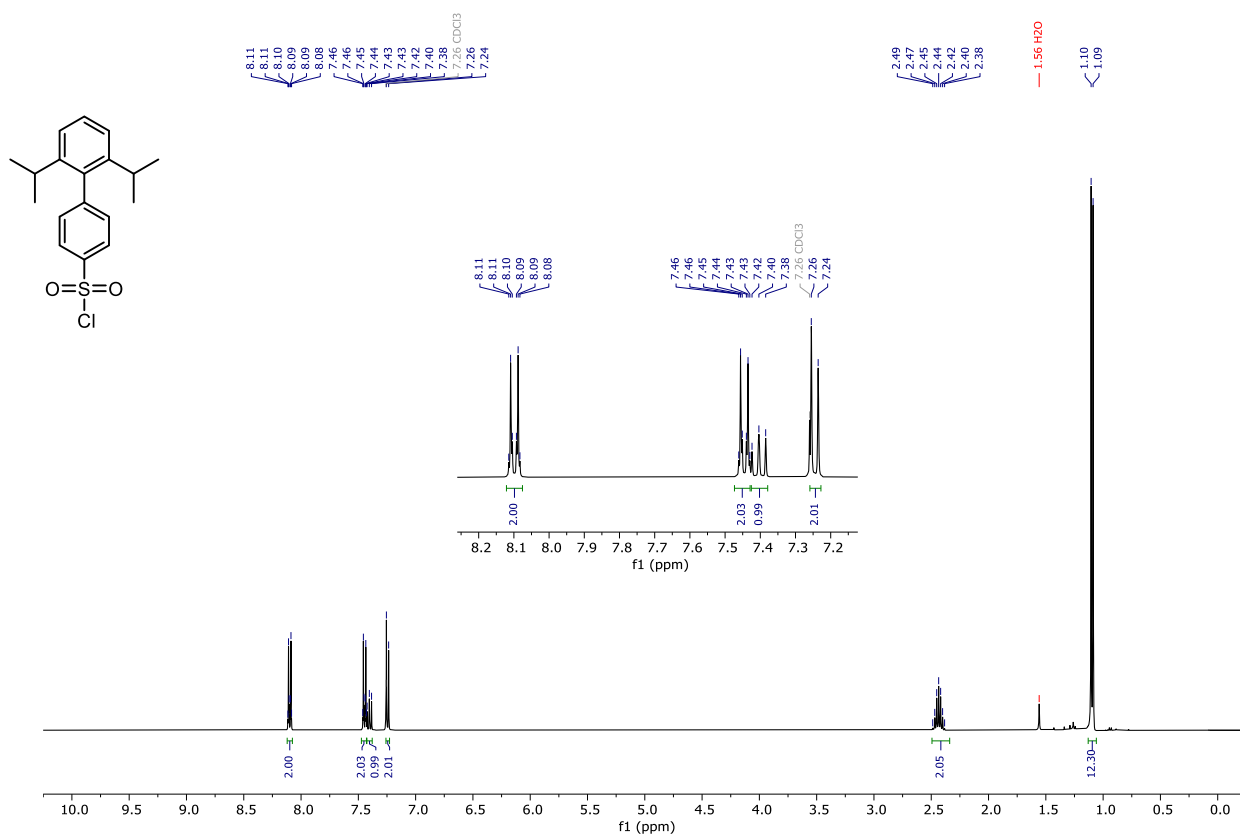

$^{13}\text{C}$  NMR (101 MHz,  $\text{CDCl}_3$ ) of **A2\_SO<sub>2</sub>Cl**

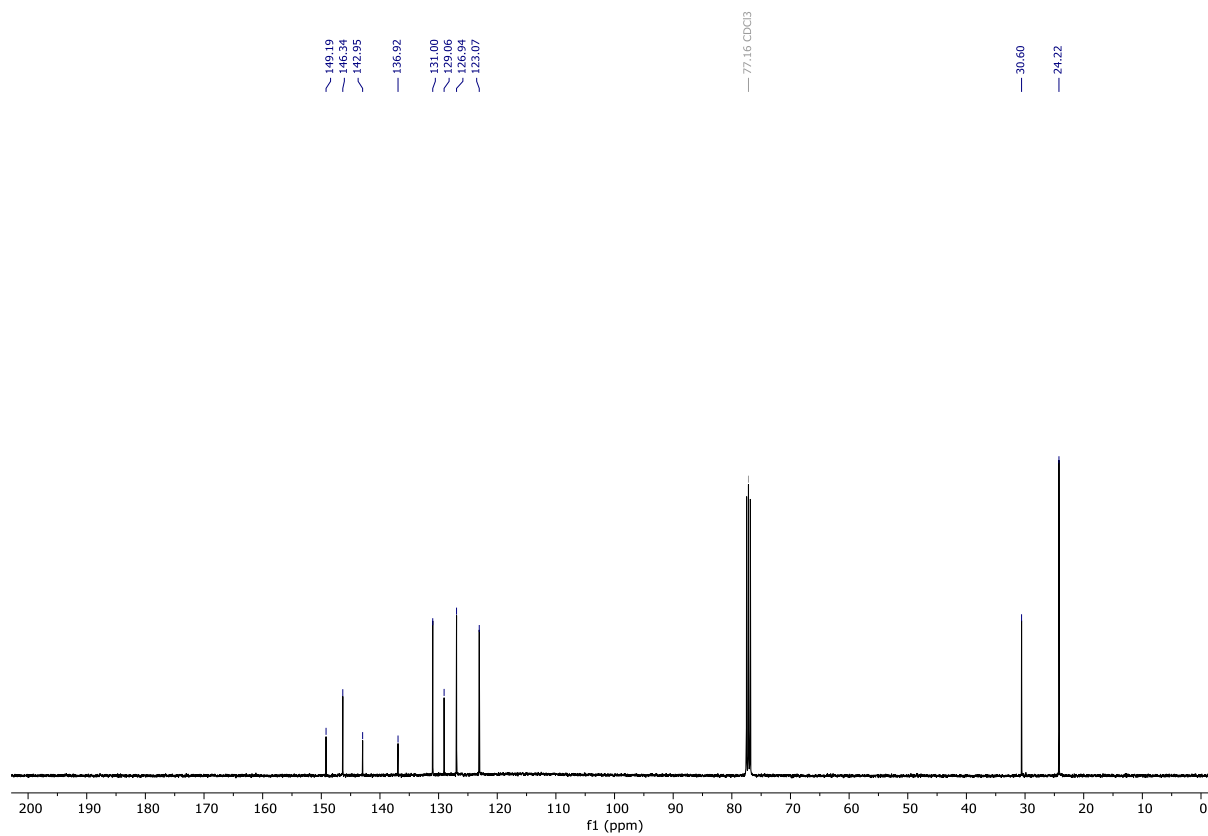

$^1\text{H}$  NMR (500 MHz,  $\text{CD}_3\text{OD}$ ) of  $\text{Na}^+\text{A}2^-$

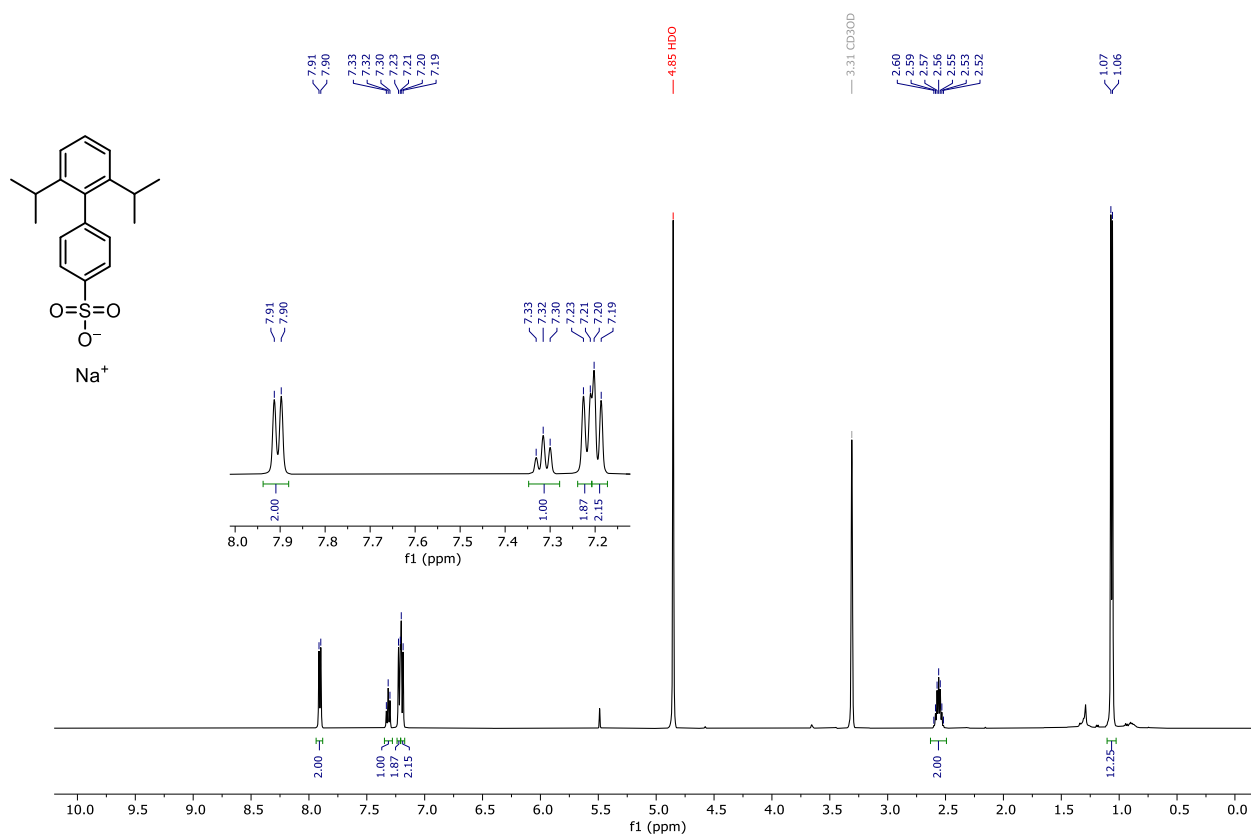

$^{13}\text{C}$  NMR (126 MHz,  $\text{CD}_3\text{OD}$ ) of  $\text{Na}^+\text{A}2^-$

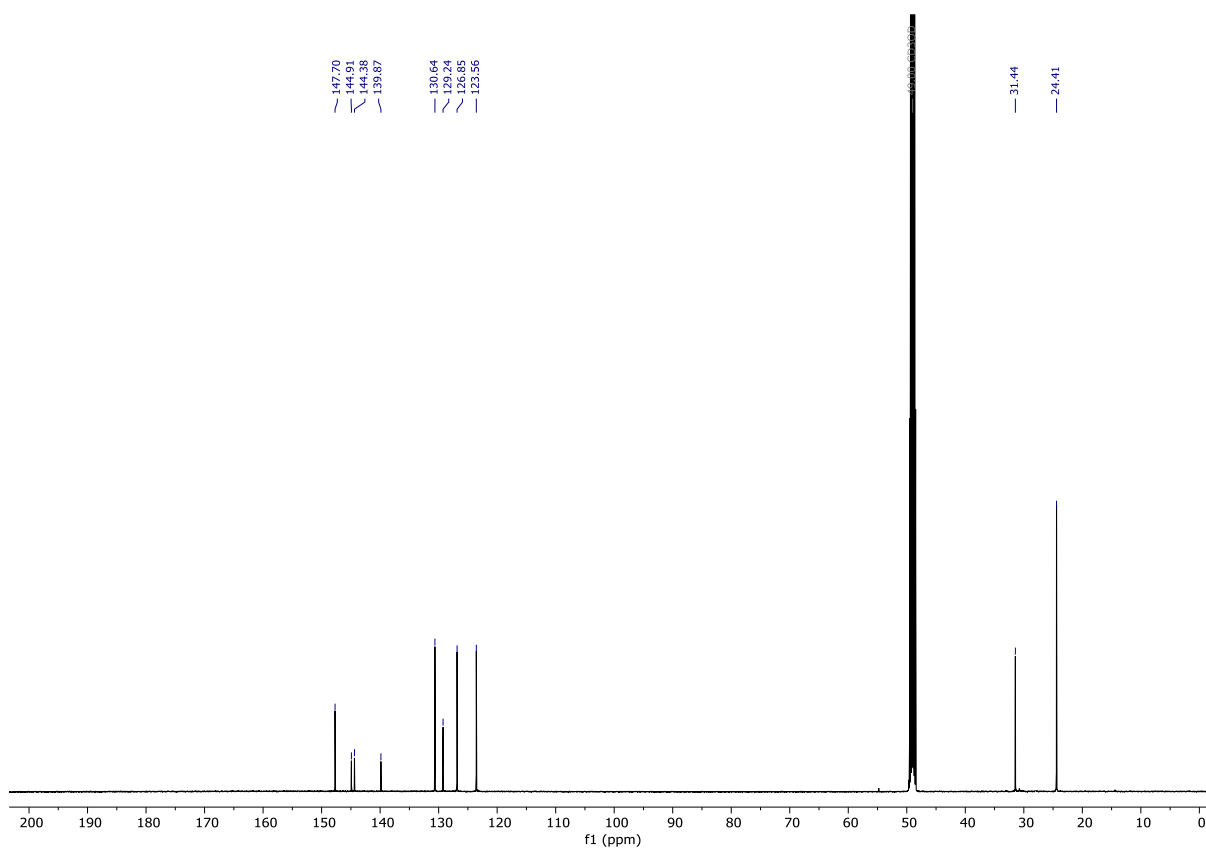



<sup>1</sup>H NMR (400 MHz, CDCl<sub>3</sub>) of **A3\_Br**

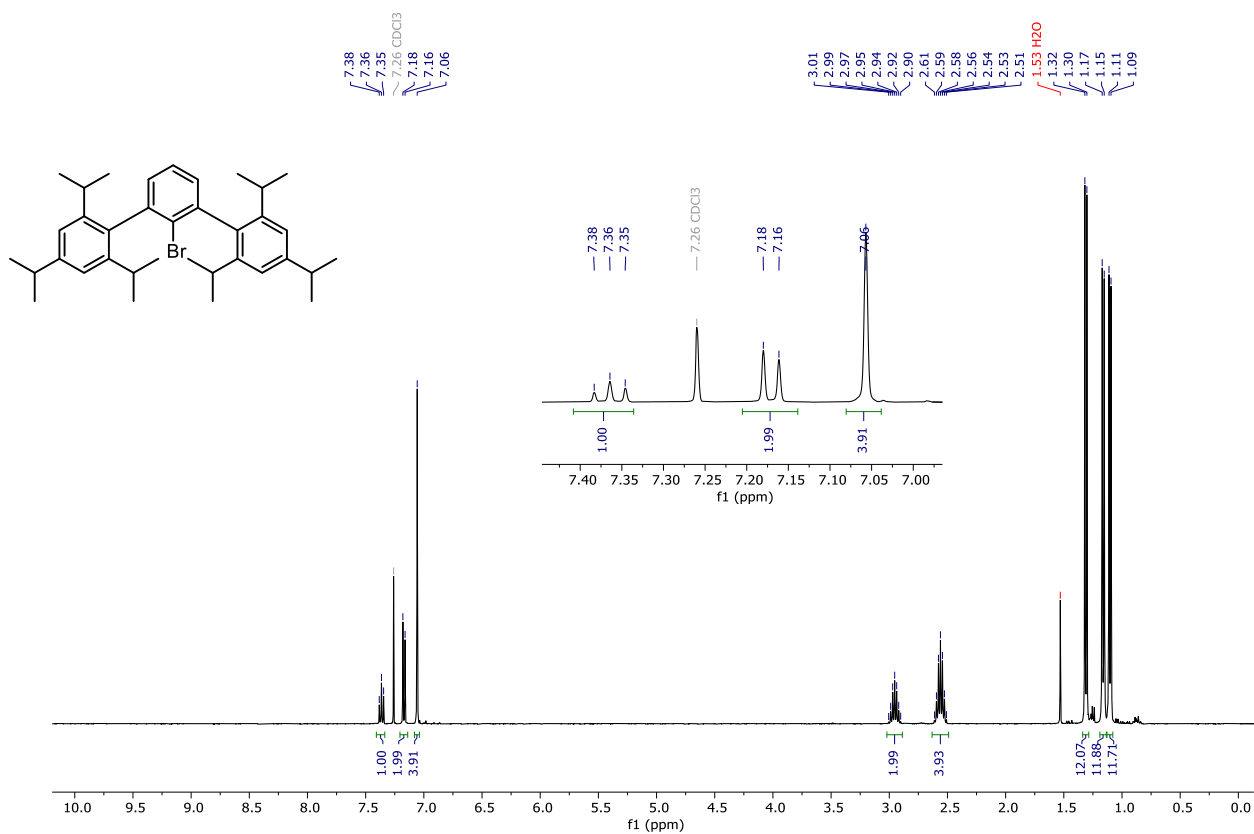

<sup>13</sup>C NMR (101 MHz, CDCl<sub>3</sub>) of **A3\_Br**

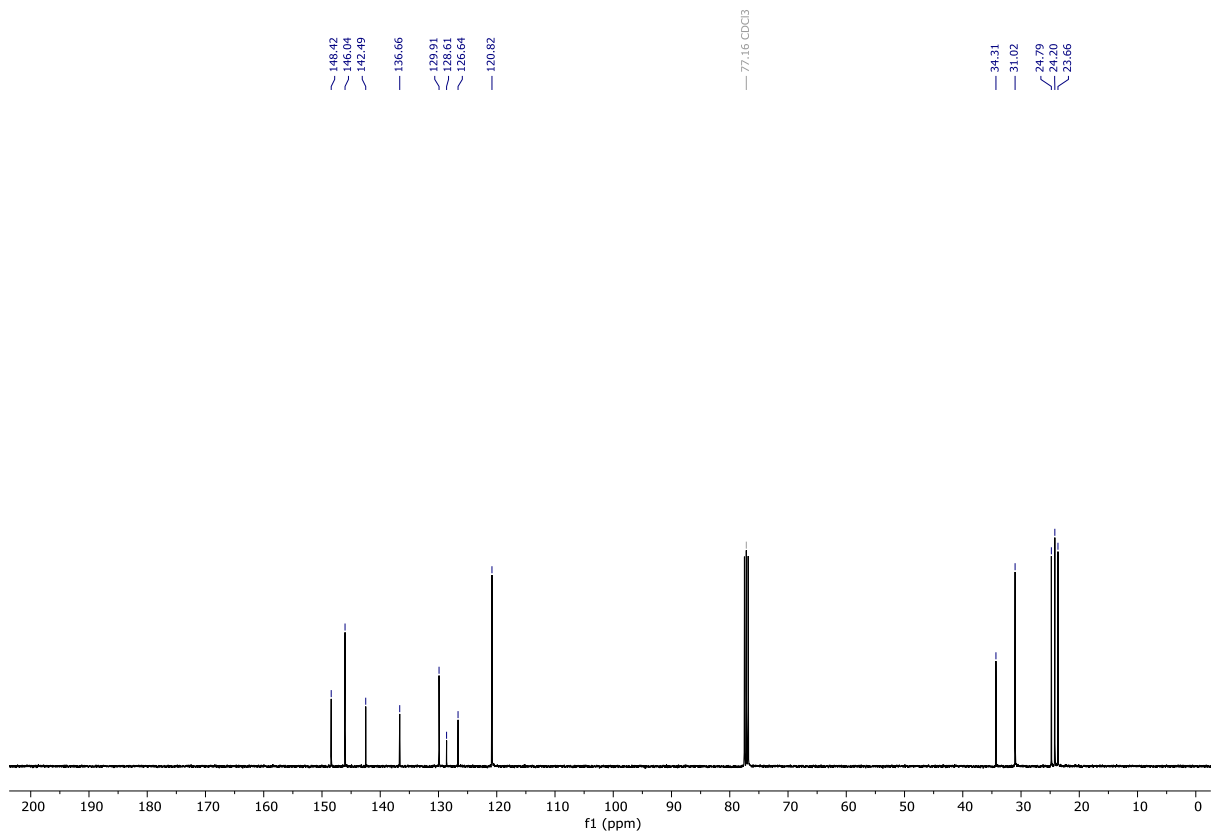

$^1\text{H}$  NMR (400 MHz,  $\text{CDCl}_3$ ) of **A3\_SO<sub>2</sub>Cl**

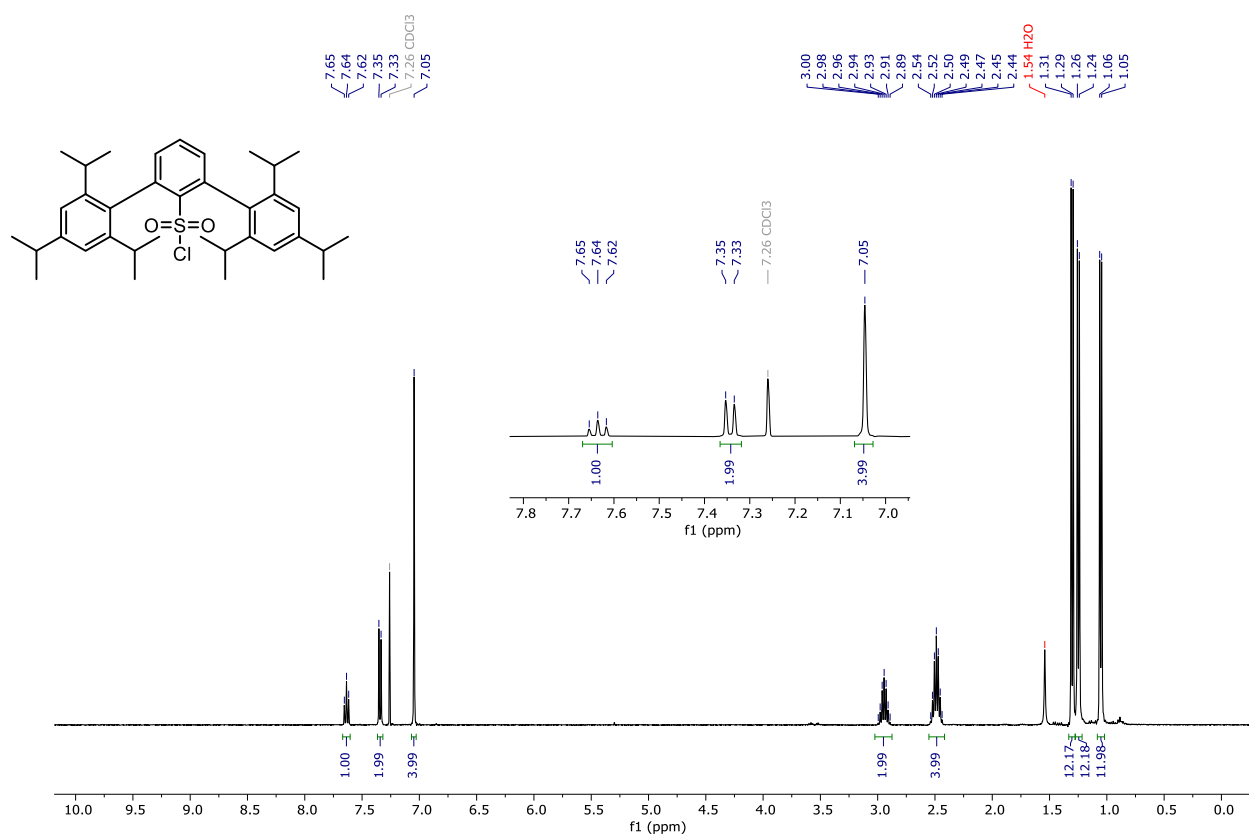

$^{13}\text{C}$  NMR (101 MHz,  $\text{CDCl}_3$ ) of **A3\_SO<sub>2</sub>Cl**

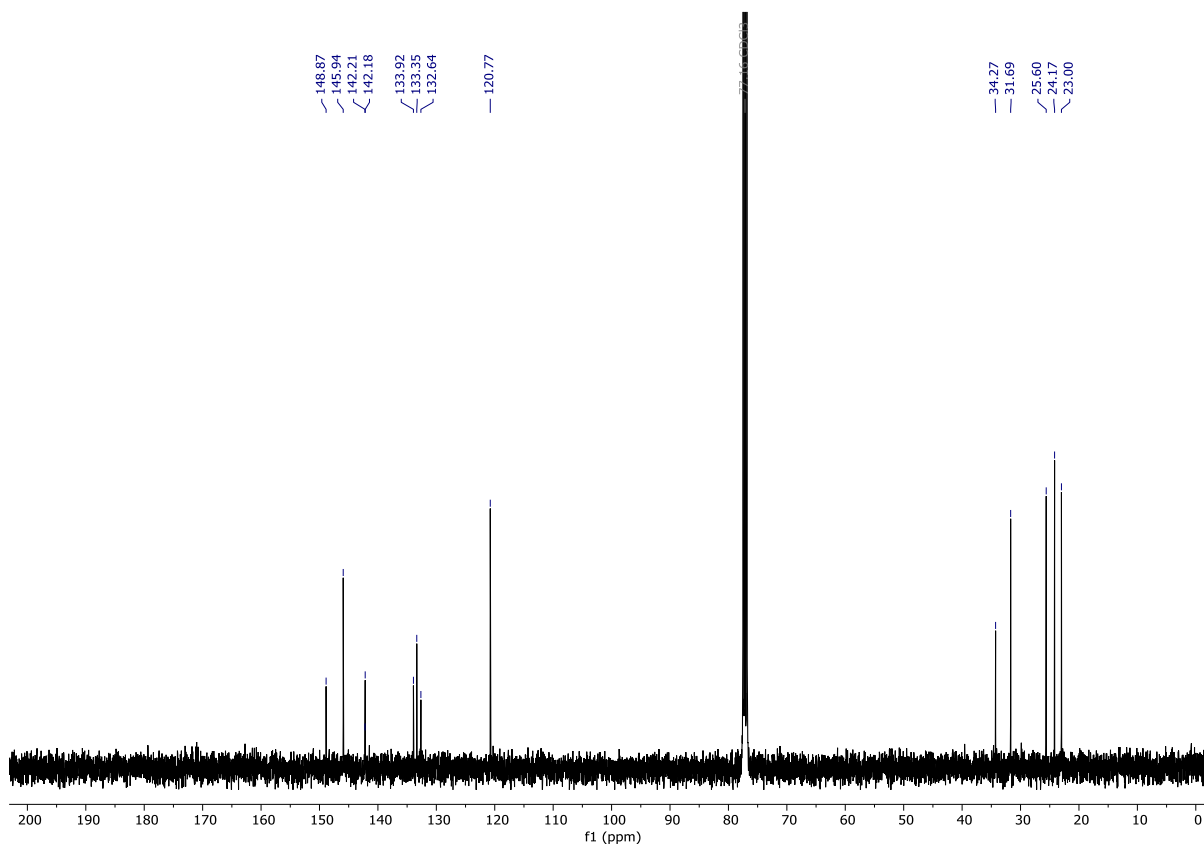

$^1\text{H}$  NMR (400 MHz,  $\text{CDCl}_3$ ) of  $\text{Na}^+\text{A3}^-$

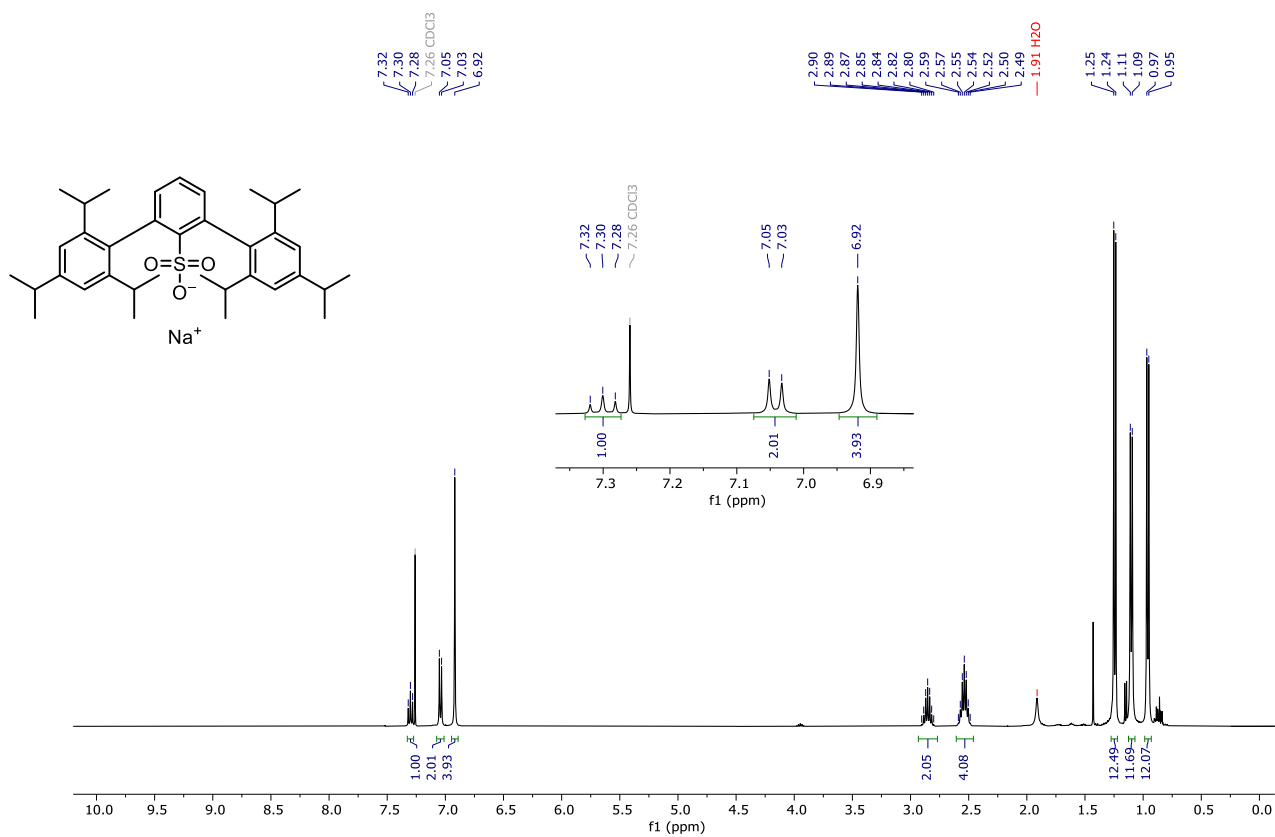

$^{13}\text{C}$  NMR (101 MHz,  $\text{CDCl}_3$ ) of  $\text{Na}^+\text{A3}^-$

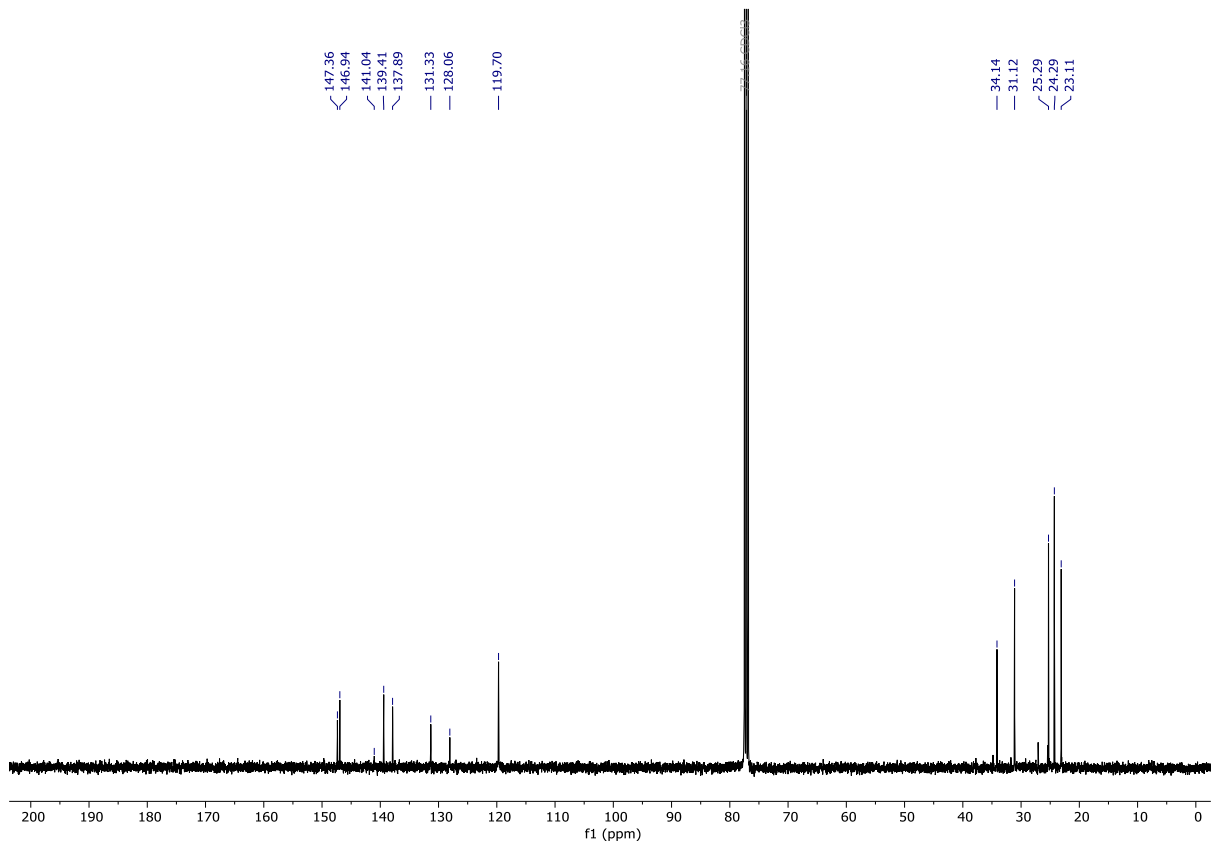

$^1\text{H}$  NMR (500 MHz,  $\text{CDCl}_3$ ) of 2,6-dichloro-4-(2,6-diisopropylphenyl)pyridine

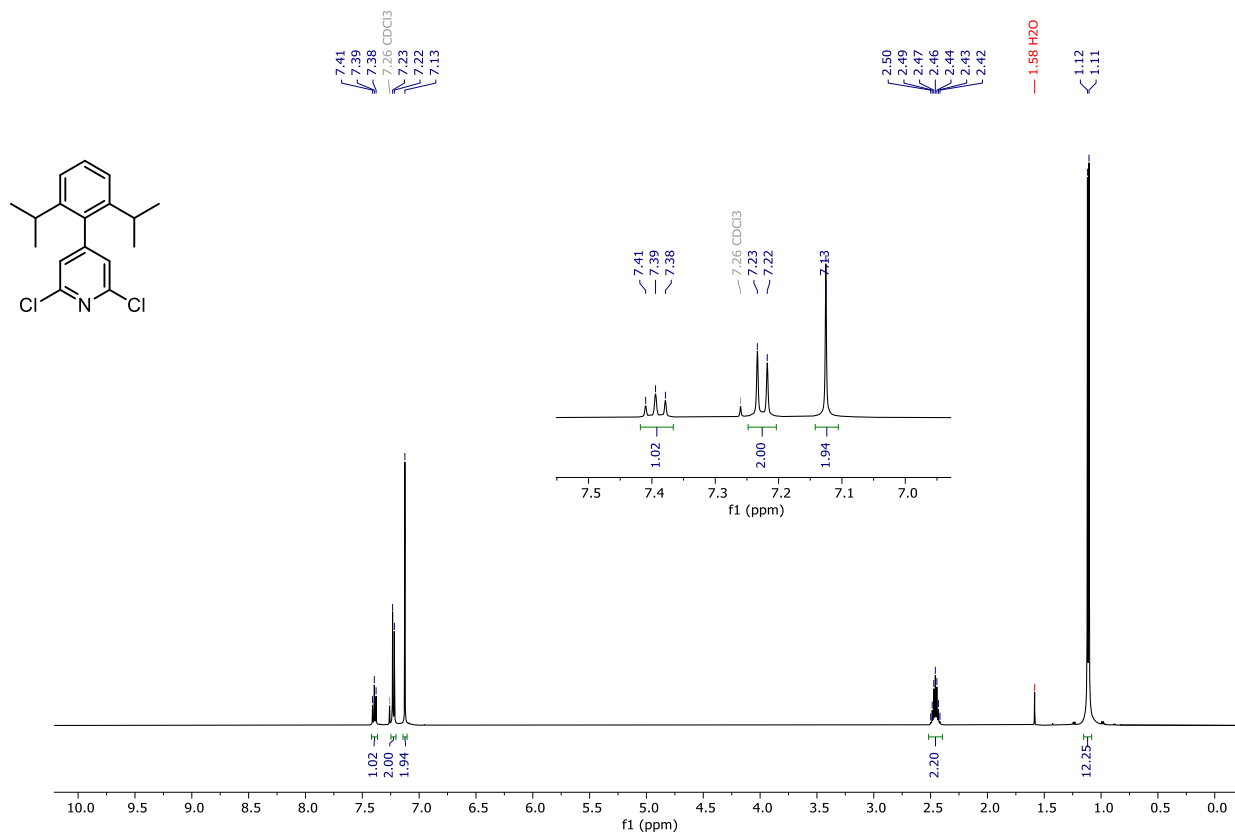

$^{13}\text{C}$  NMR (126 MHz,  $\text{CDCl}_3$ ) of 2,6-dichloro-4-(2,6-diisopropylphenyl)pyridine

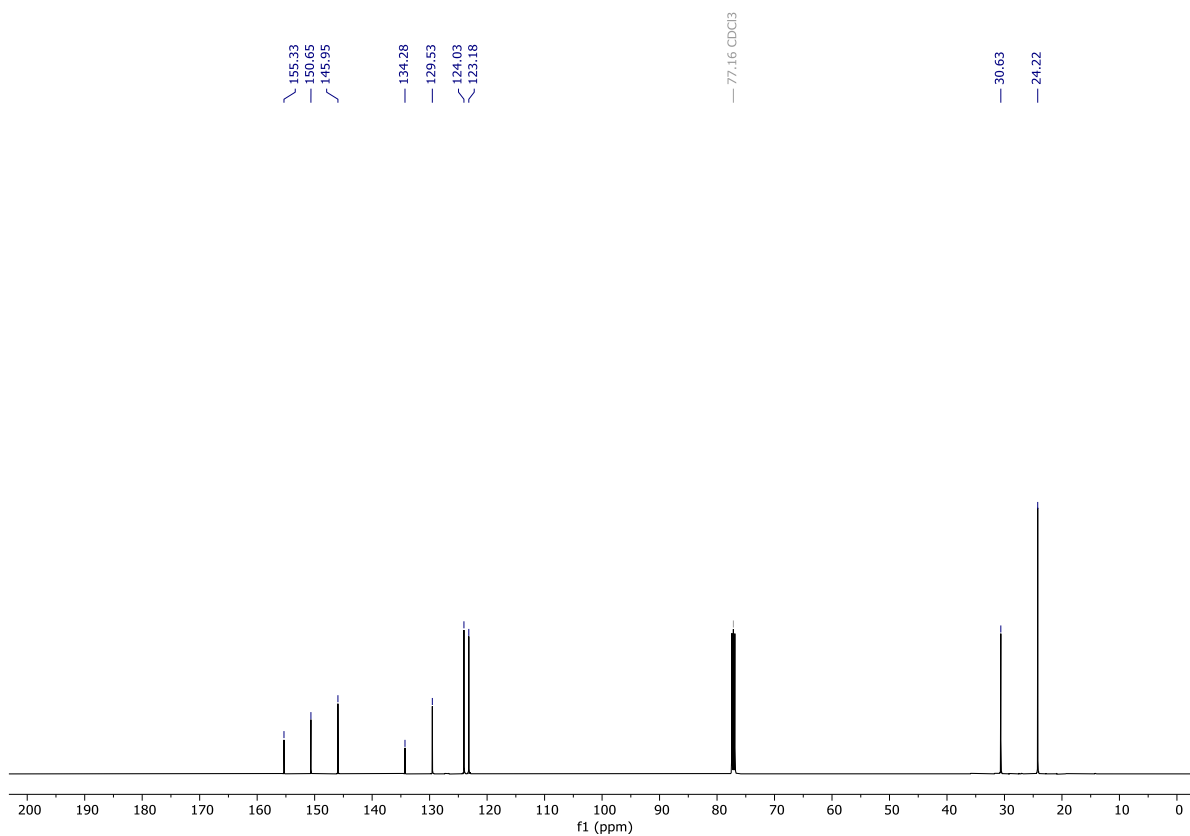

$^1\text{H}$  NMR (500 MHz,  $\text{CDCl}_3$ ) of **C4\_N**

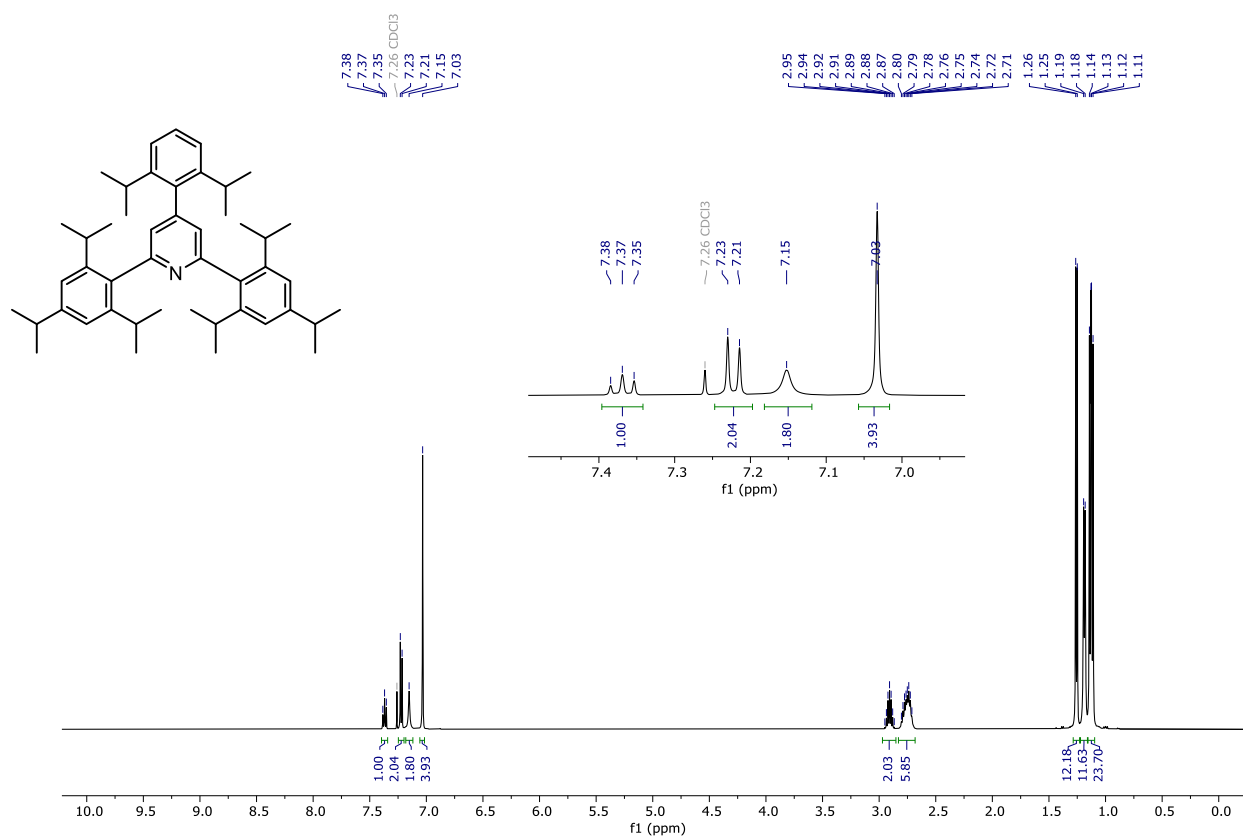

$^{13}\text{C}$  NMR (126 MHz,  $\text{CDCl}_3$ ) of **C4\_N**

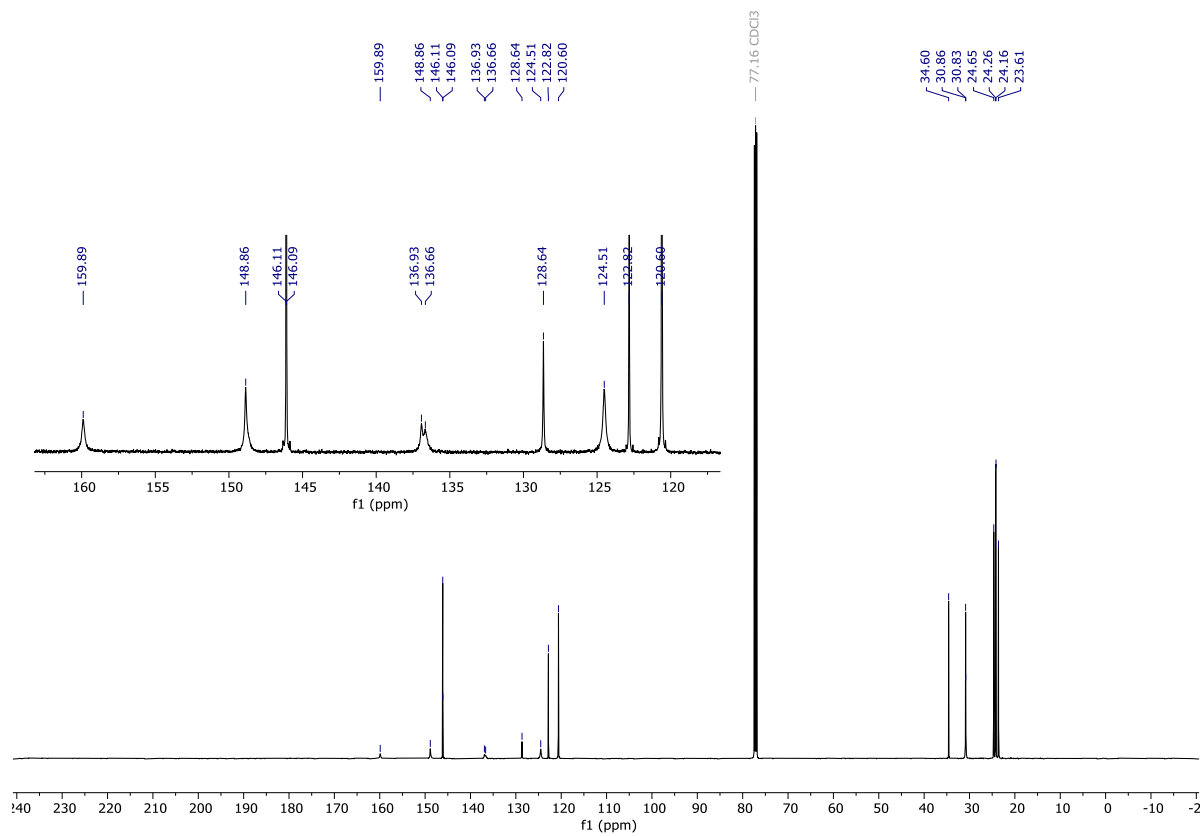

$^1\text{H}$  NMR (500 MHz,  $\text{CDCl}_3$ ) of  $\text{C4}^+\text{BF}_4^-$

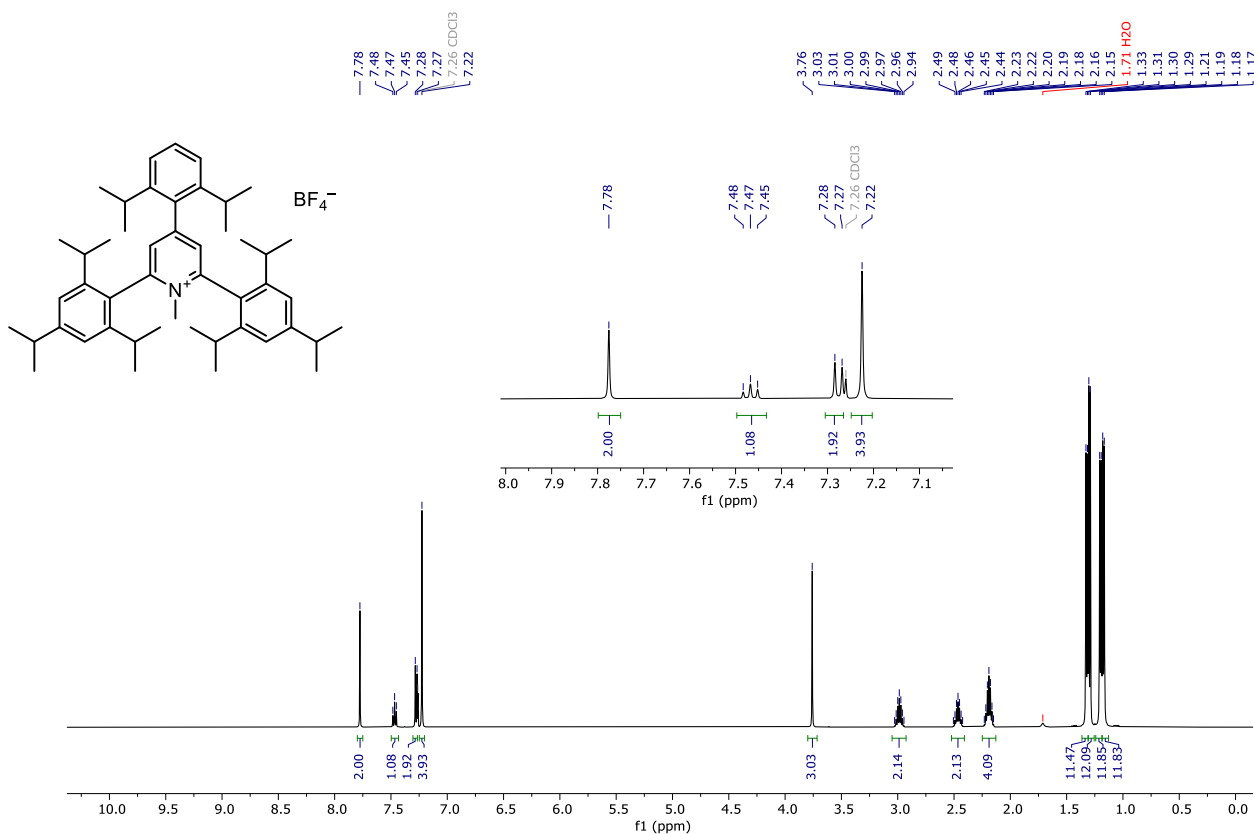

$^{13}\text{C}$  NMR (126 MHz,  $\text{CDCl}_3$ ) of  $\text{C4}^+\text{BF}_4^-$

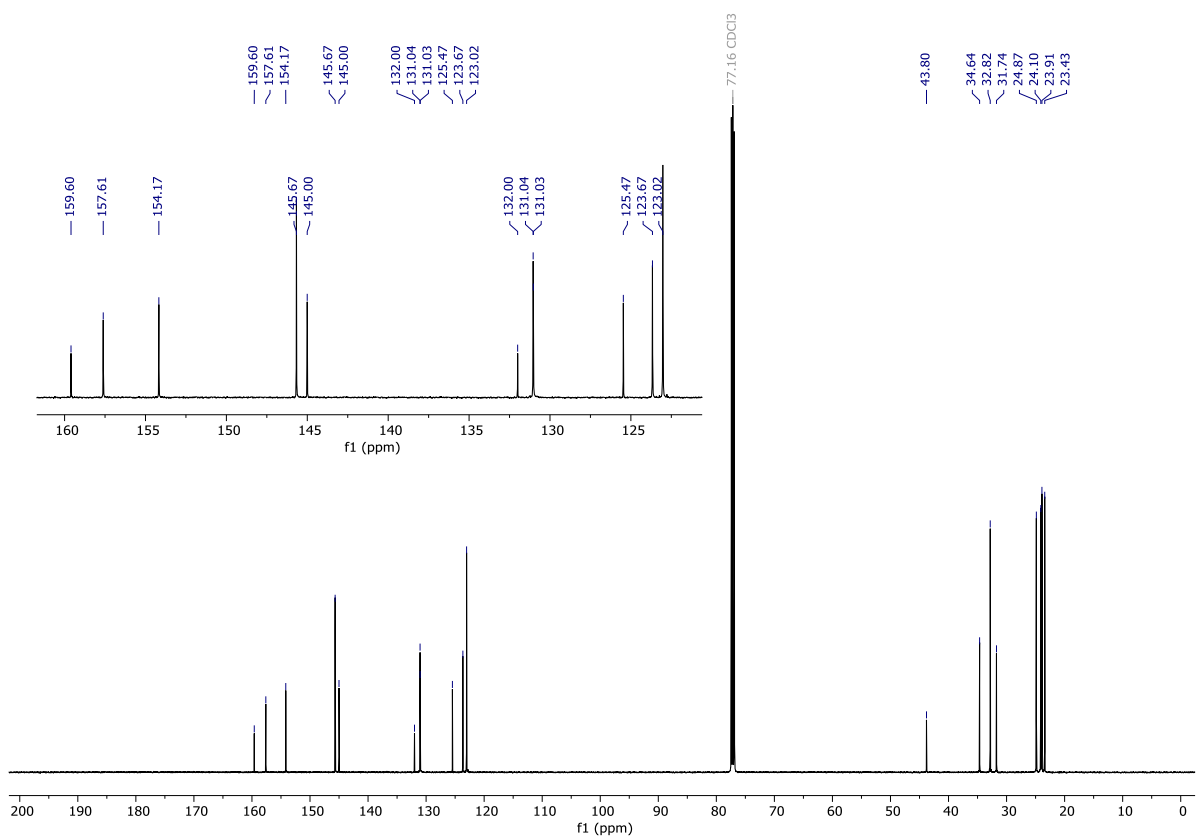

$^{19}\text{F}$  NMR (471 MHz,  $\text{CDCl}_3$ ) of  $\text{C}_4^+\text{BF}_4^-$

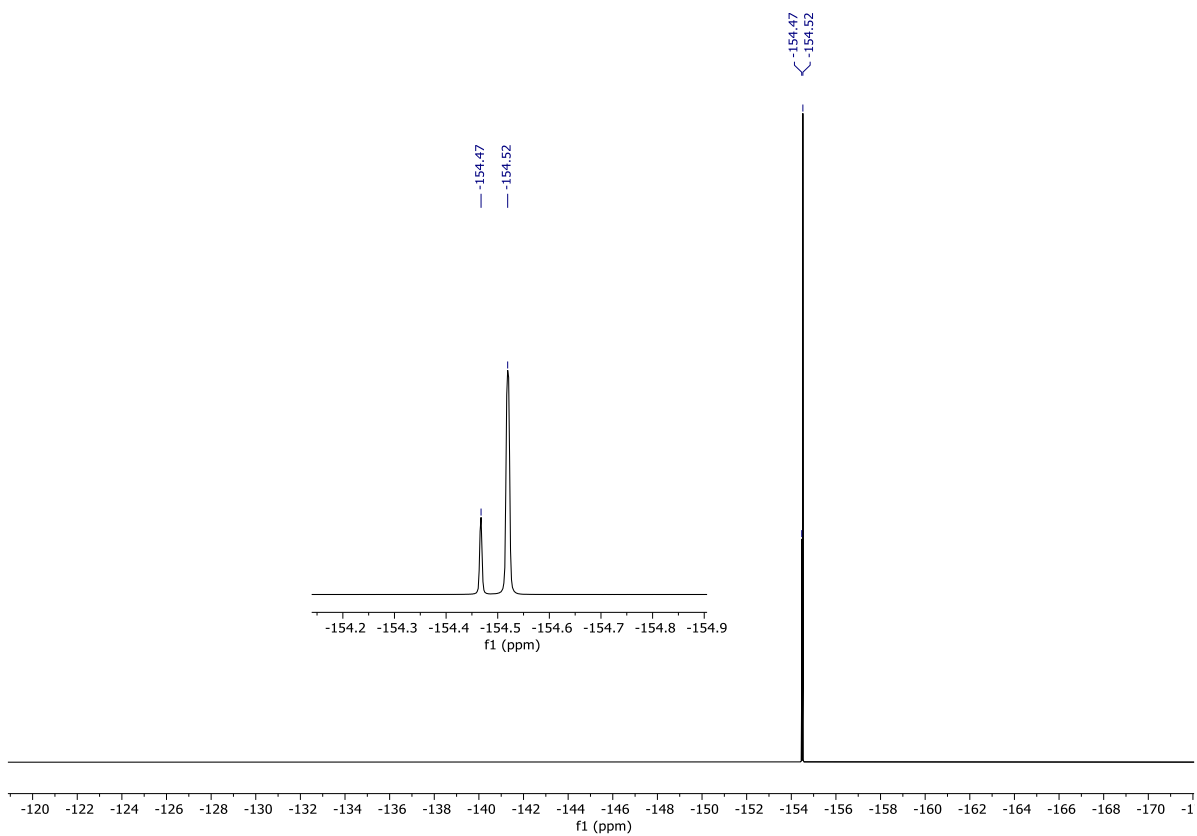

<sup>1</sup>H NMR (400 MHz, CDCl<sub>3</sub>) of C5\_N

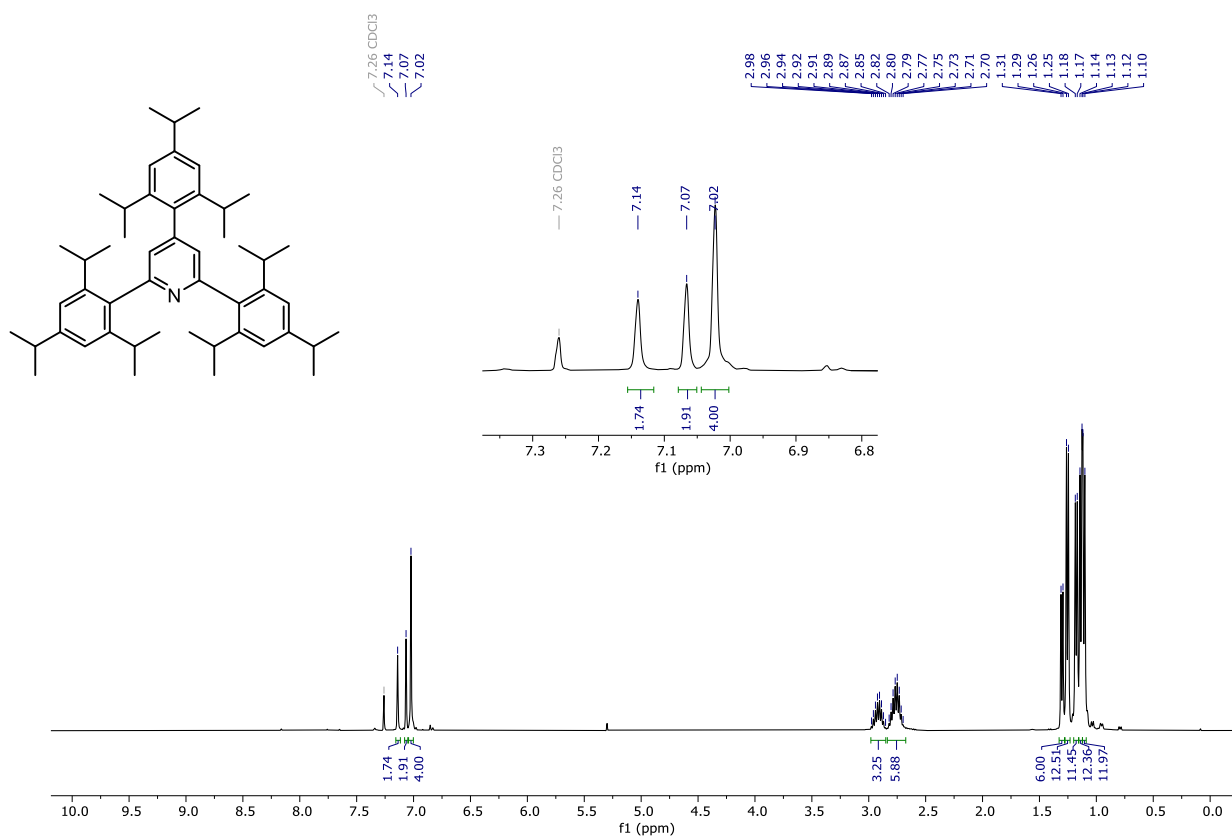

<sup>13</sup>C NMR (101 MHz, CDCl<sub>3</sub>) of C5\_N

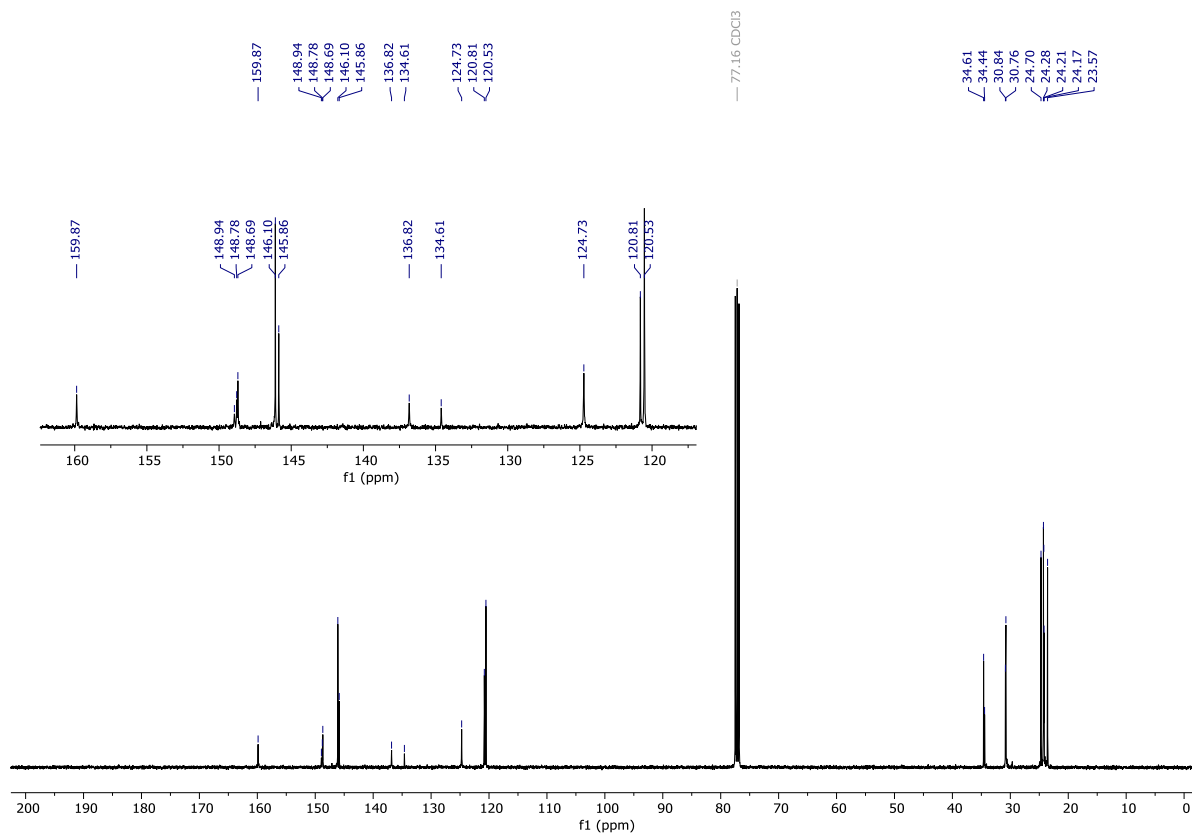



$^1\text{H}$  NMR (500 MHz,  $\text{CDCl}_3$ ) of  $\text{C5}^+\text{BF}_4^-$

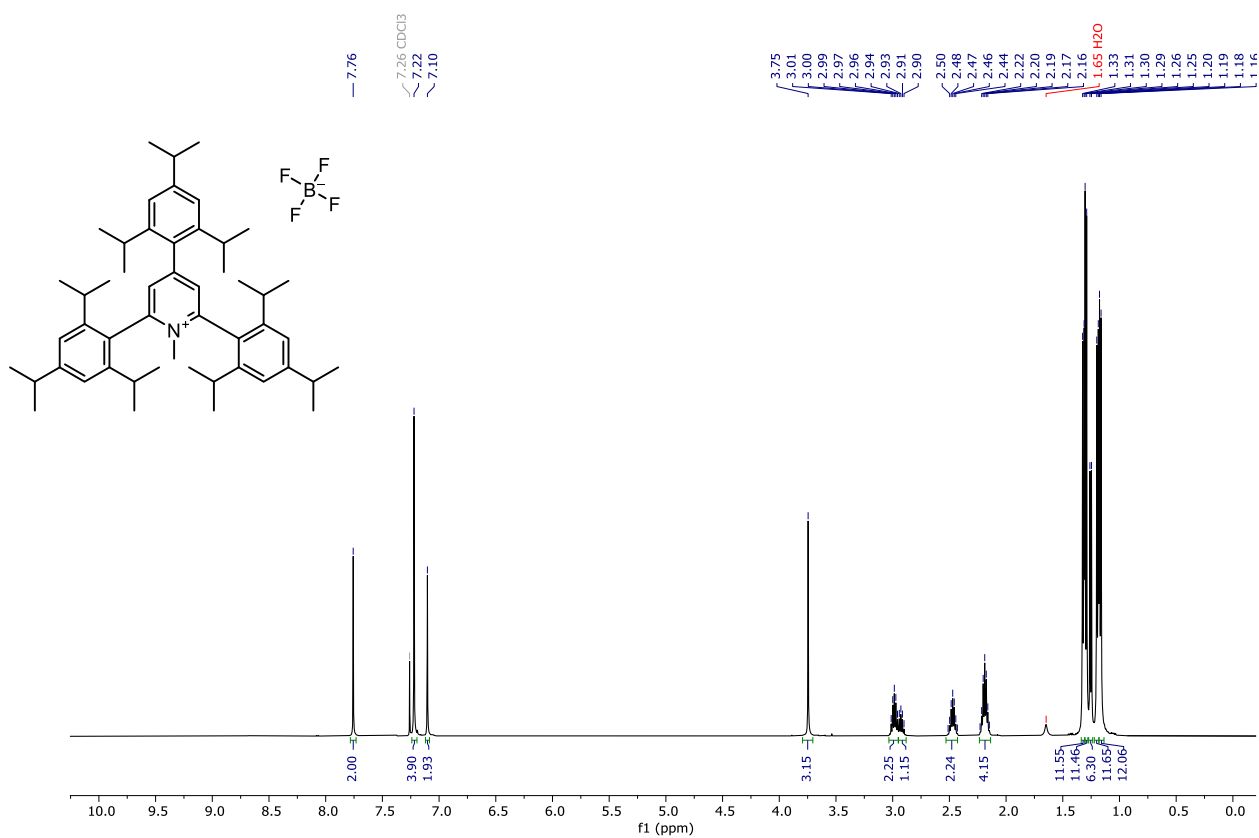

$^{13}\text{C}$  NMR (126 MHz,  $\text{CDCl}_3$ ) of  $\text{C5}^+\text{BF}_4^-$

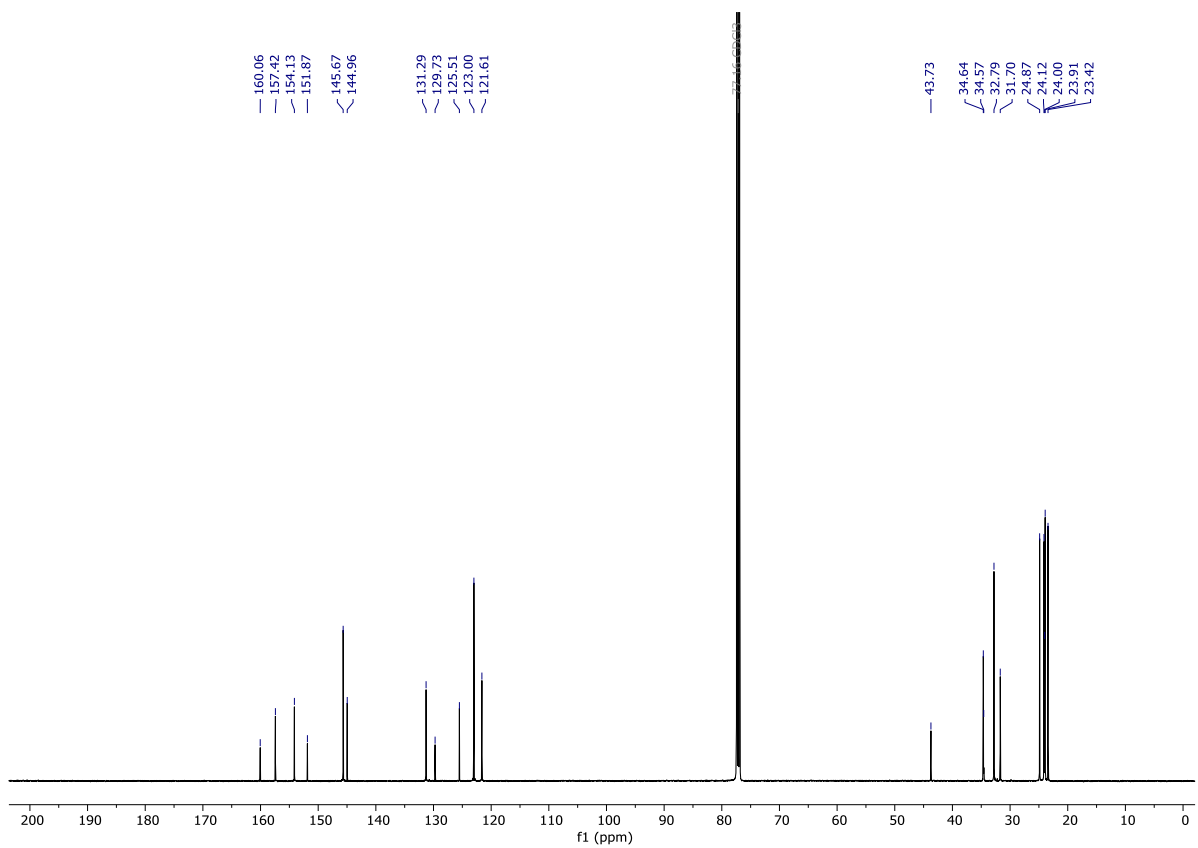

$^{19}\text{F}$  NMR (471 MHz,  $\text{CDCl}_3$ ) of  $\text{C5}^+\text{BF}_4^-$

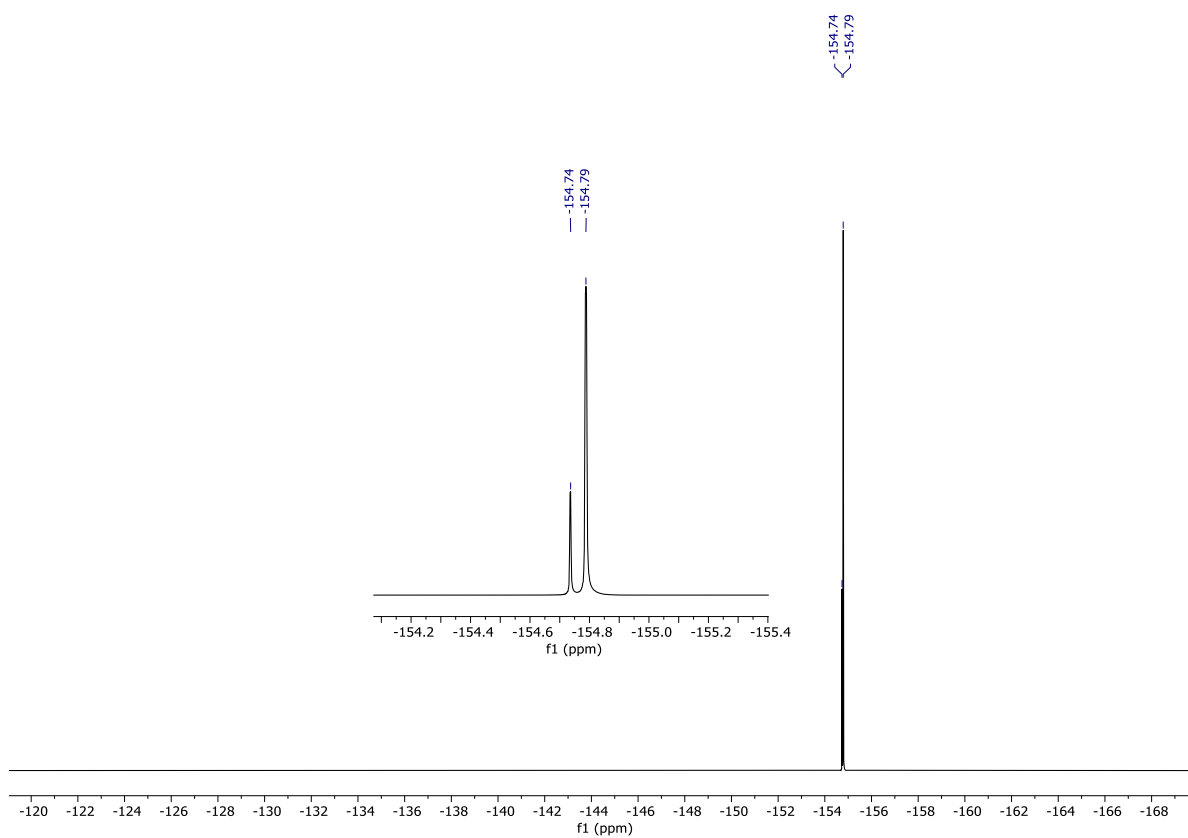

$^1\text{H}$  NMR (400 MHz,  $\text{CDCl}_3$ ) of 2-(4-bromo-3,5-diisopropylphenyl)-4,4,5,5-tetramethyl-1,3,2-dioxaborolane

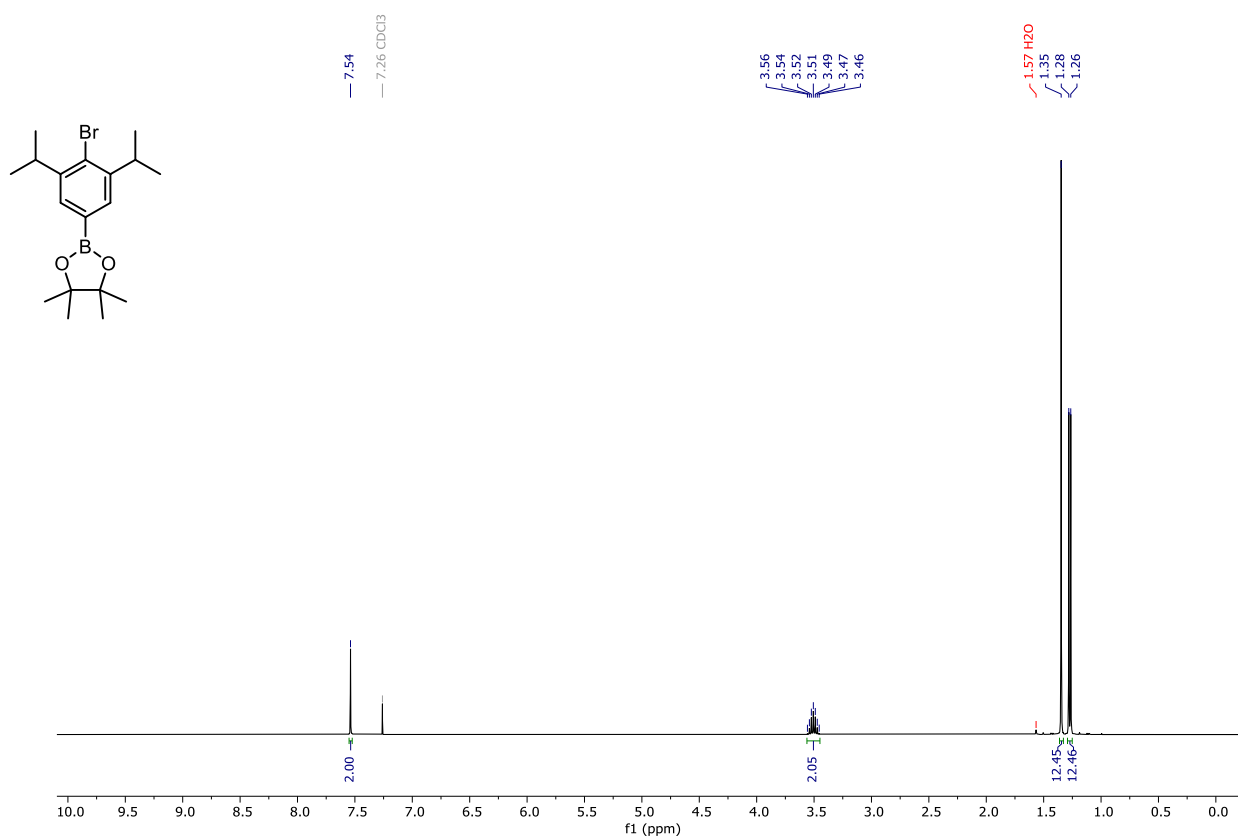

$^{13}\text{C}$  NMR (101 MHz,  $\text{CDCl}_3$ ) of 2-(4-bromo-3,5-diisopropylphenyl)-4,4,5,5-tetramethyl-1,3,2-dioxaborolane

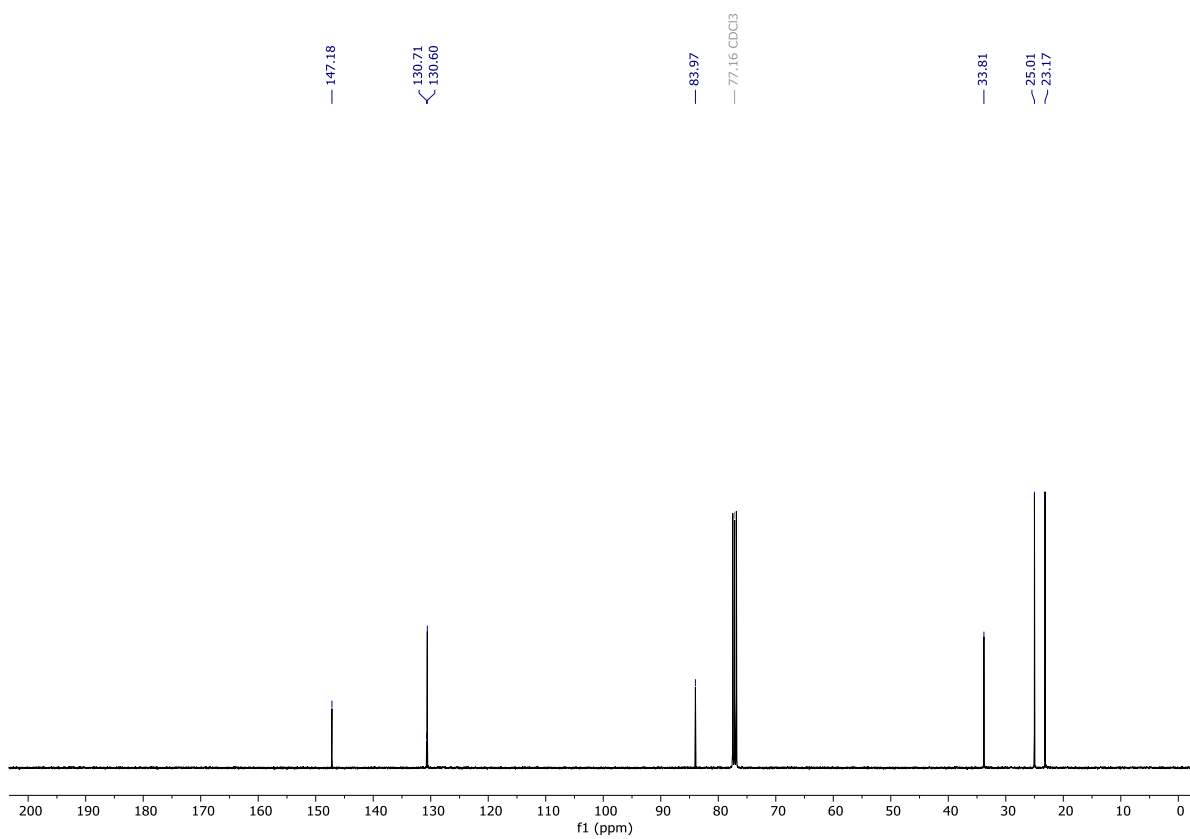

$^1\text{H}$  NMR (400 MHz,  $\text{CDCl}_3$ ) of  $\text{R}^b\text{-Br}$

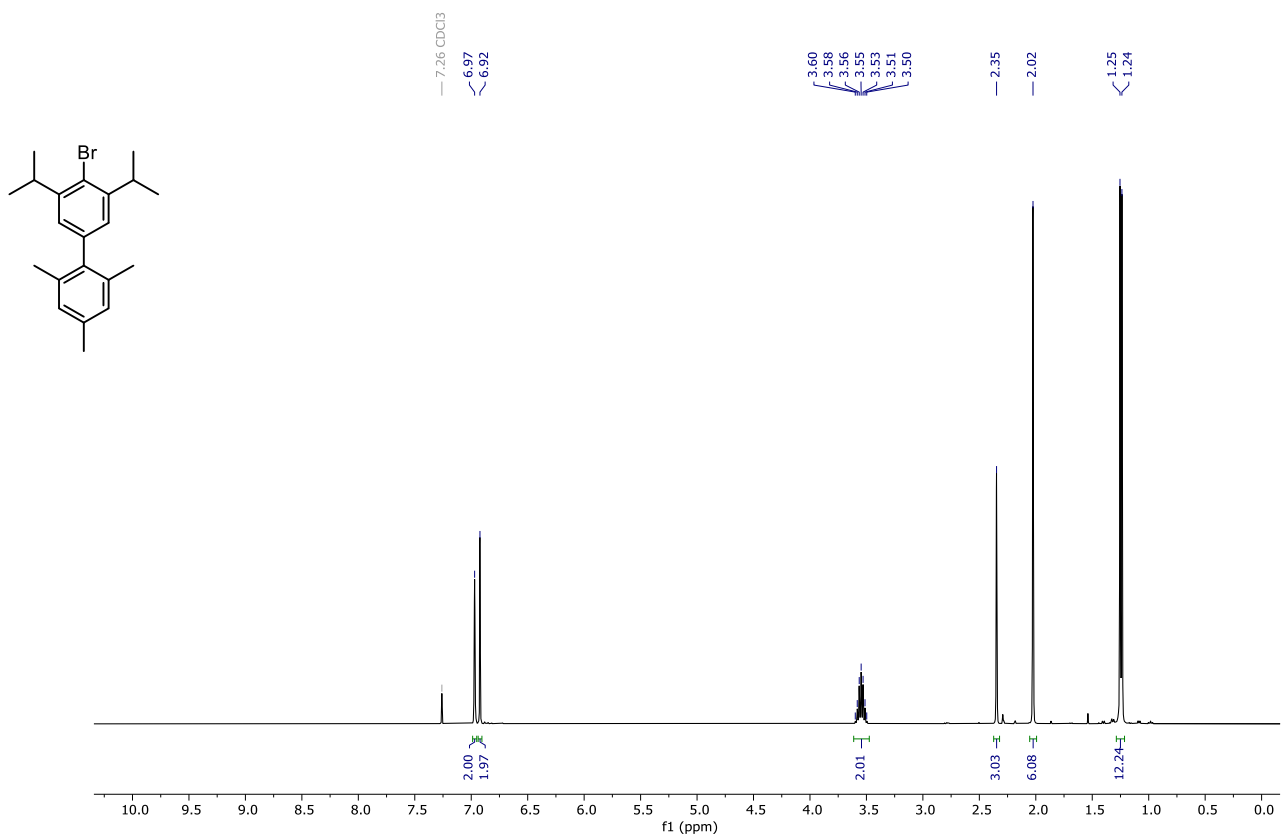

$^{13}\text{C}$  NMR (101 MHz,  $\text{CDCl}_3$ ) of  $\text{R}^b\text{-Br}$

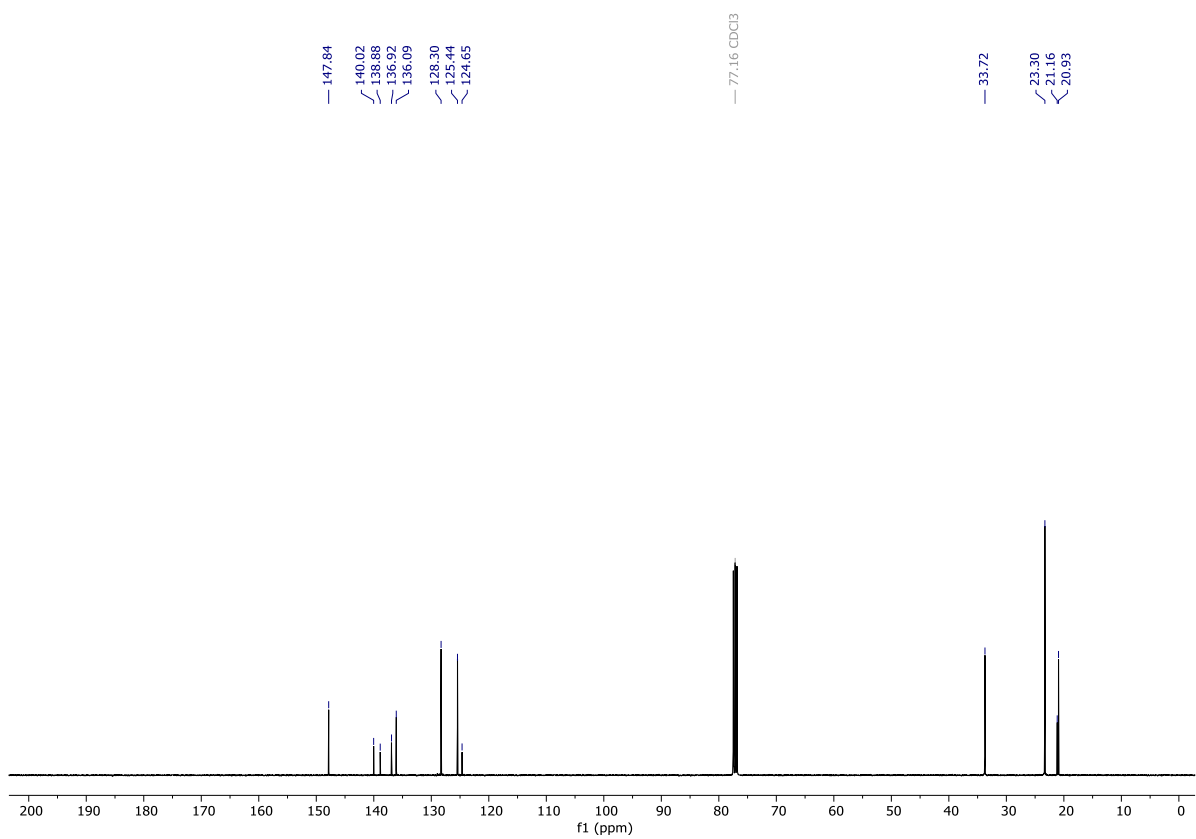

<sup>1</sup>H NMR (400 MHz, CDCl<sub>3</sub>) of C6\_N

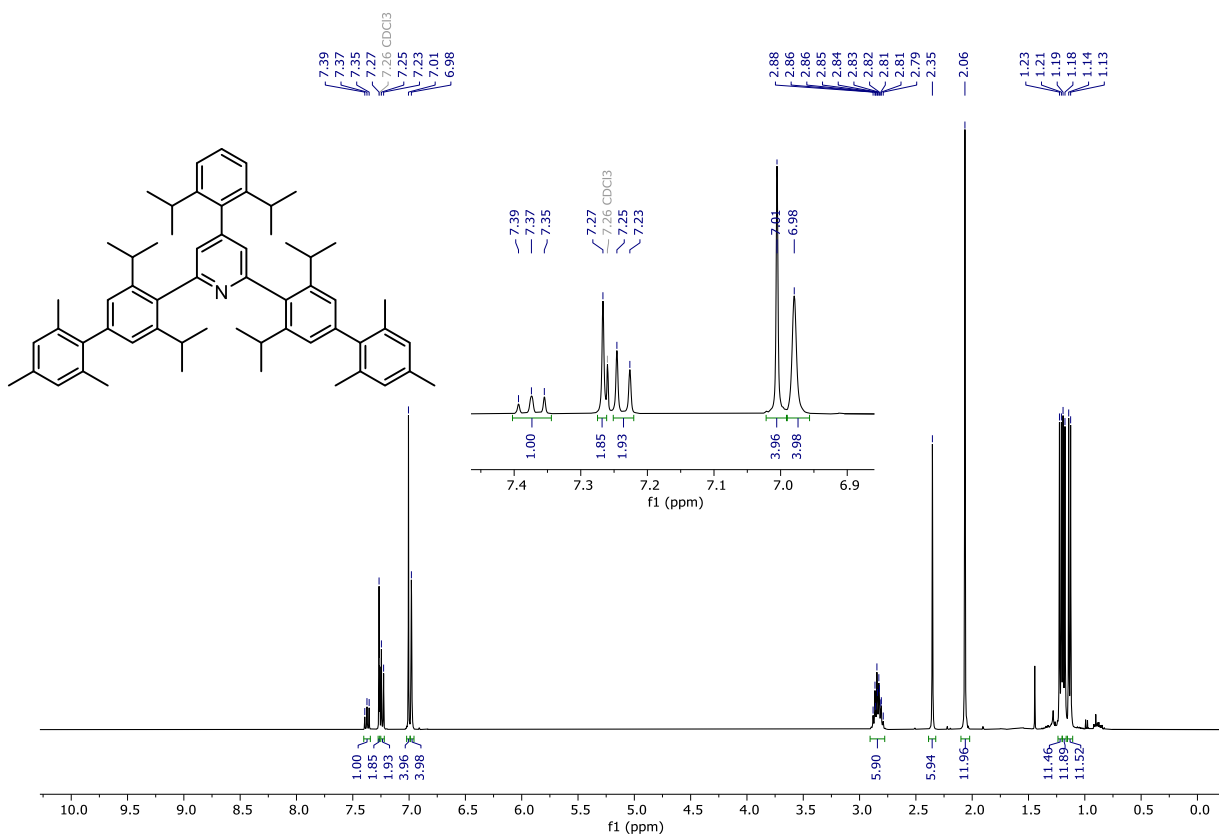

<sup>13</sup>C NMR (101 MHz, CDCl<sub>3</sub>) of C6\_N

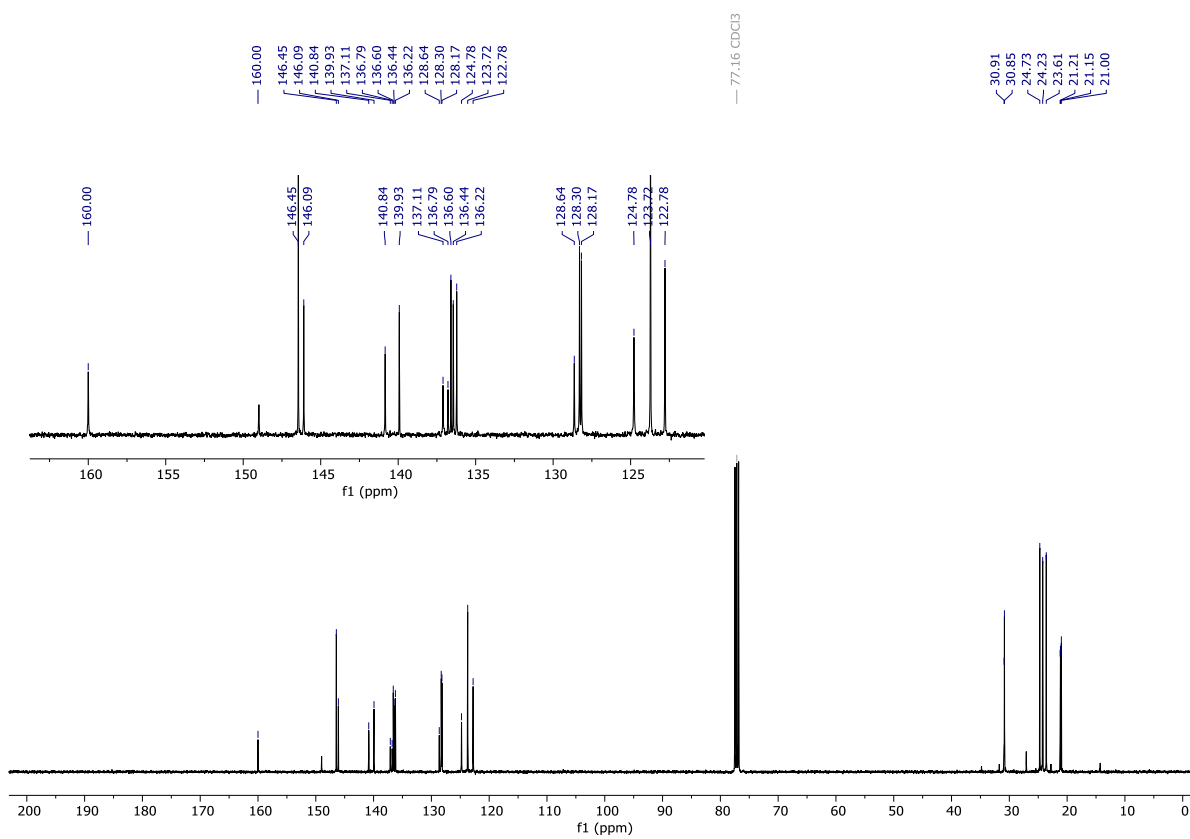

$^1\text{H}$  NMR (400 MHz,  $\text{CDCl}_3$ ) of  $\text{C6}^+\text{BF}_4^-$

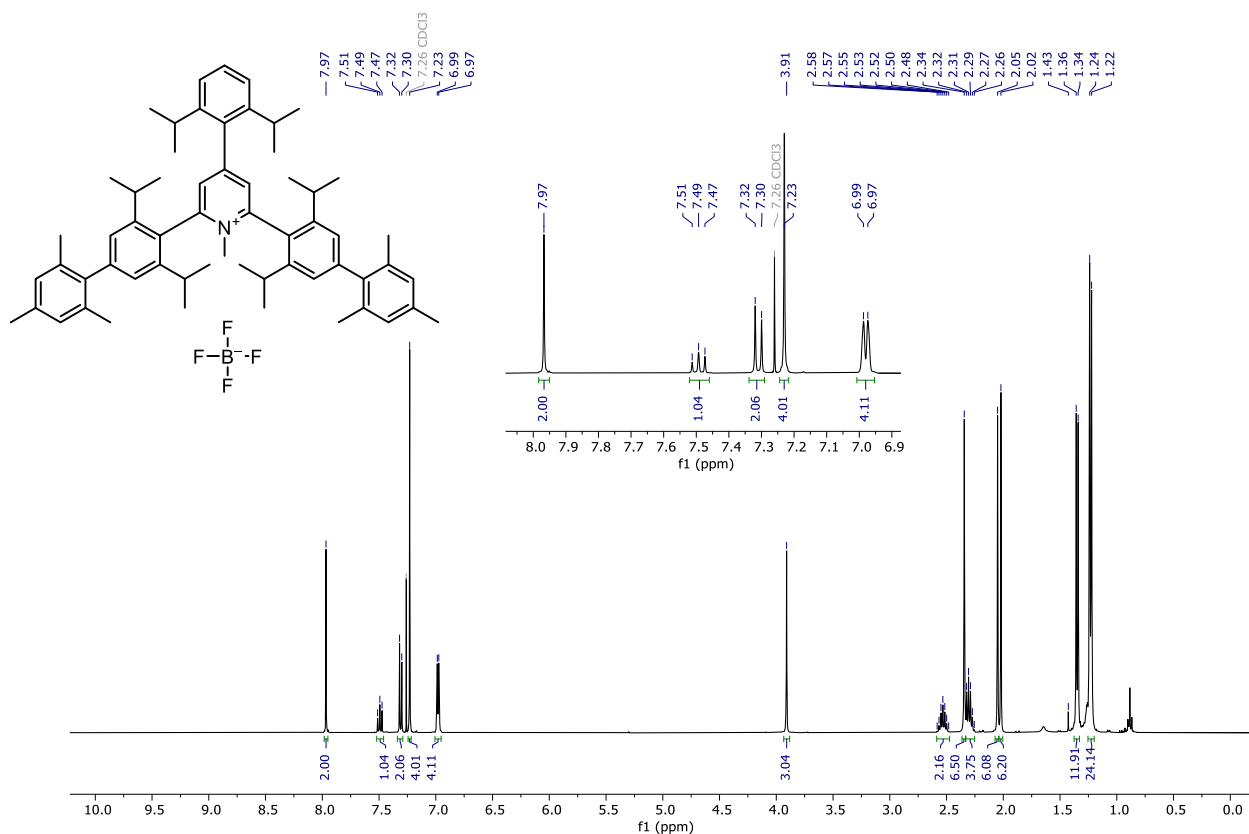

$^{13}\text{C}$  NMR (101 MHz,  $\text{CDCl}_3$ ) of  $\text{C6}^+\text{BF}_4^-$

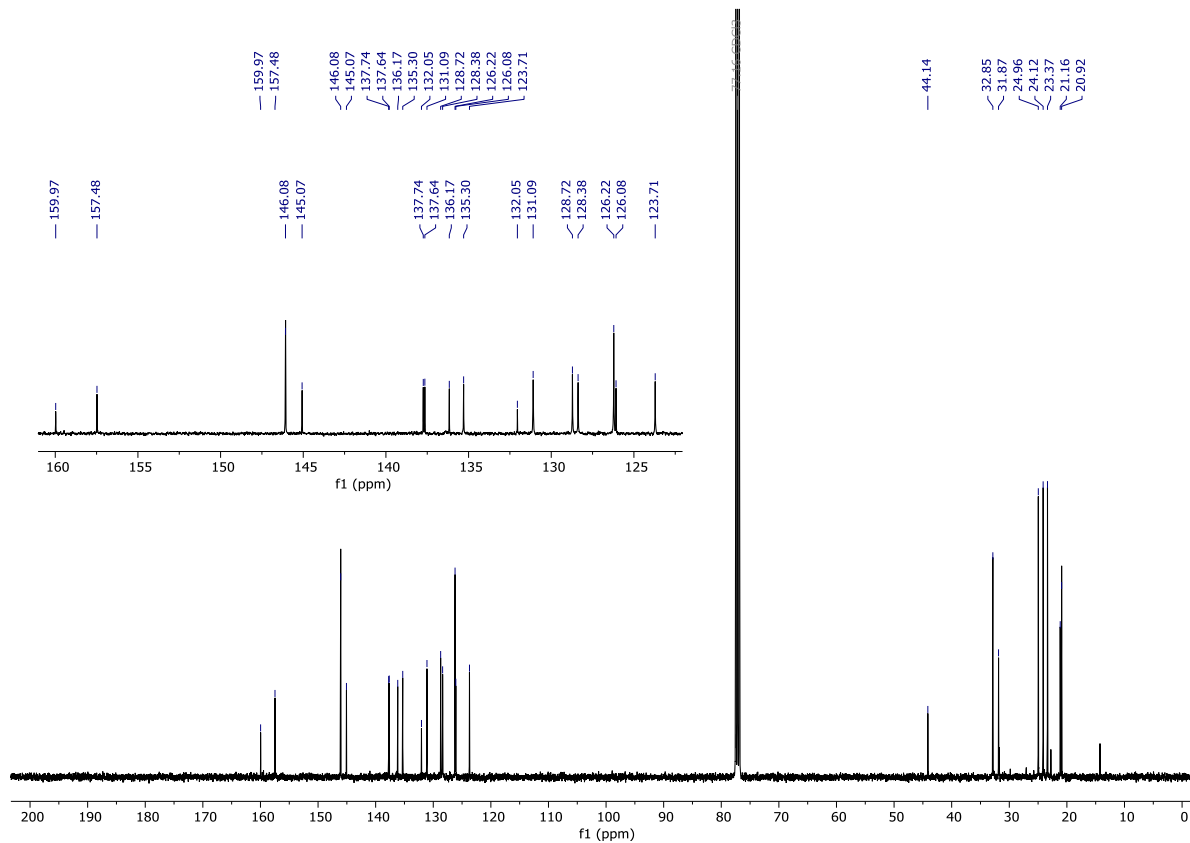

$^{19}\text{F}$  NMR (376 MHz,  $\text{CDCl}_3$ ) of  $\text{C6}^+\text{BF}_4^-$

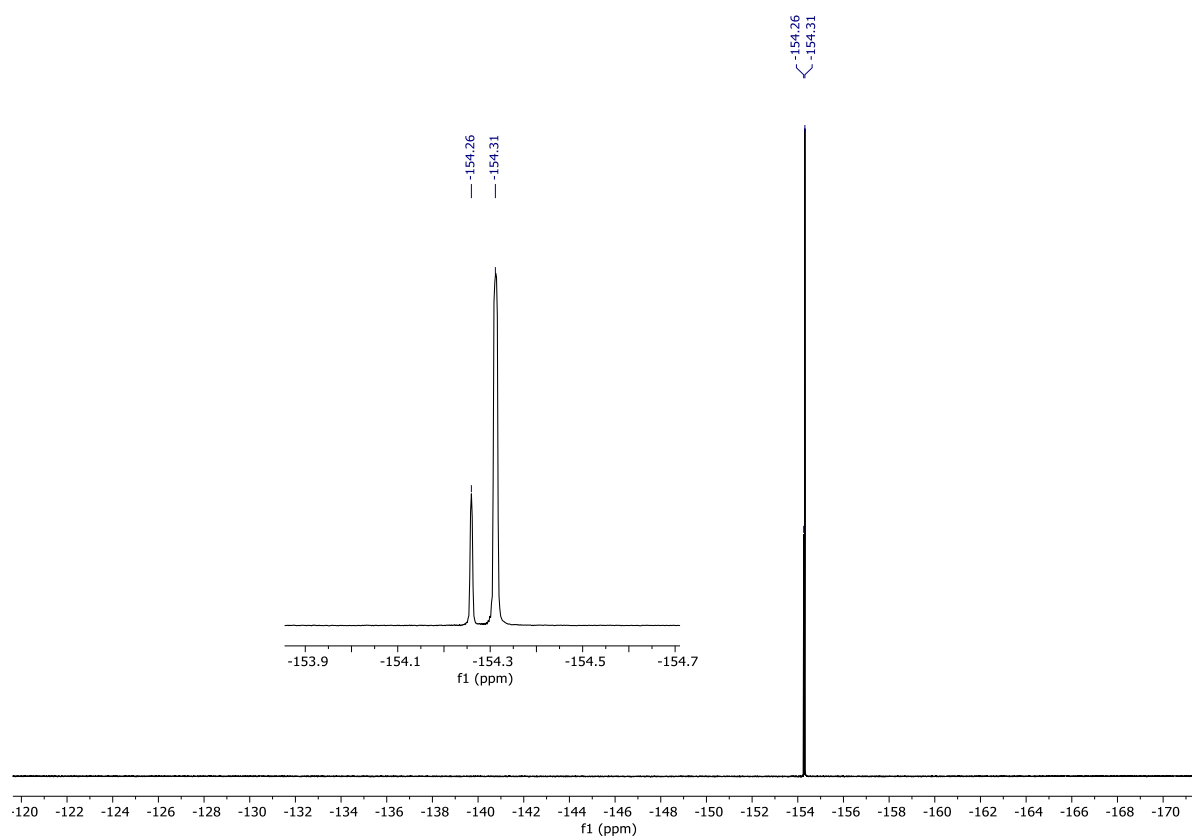

$^1\text{H}$  NMR (400 MHz,  $\text{CDCl}_3$ ) of  $\text{R}^c\text{-Br}$

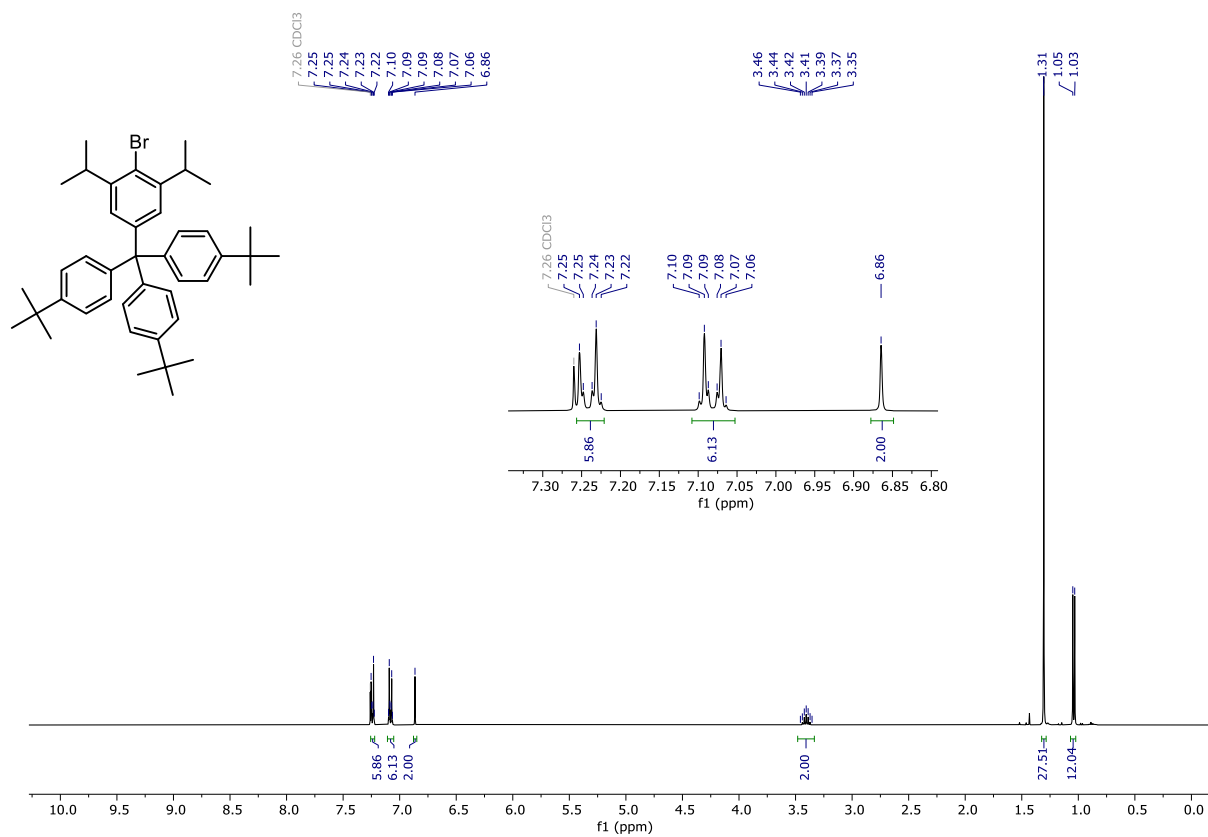

$^{13}\text{C}$  NMR (101 MHz,  $\text{CDCl}_3$ ) of  $\text{R}^c\text{-Br}$

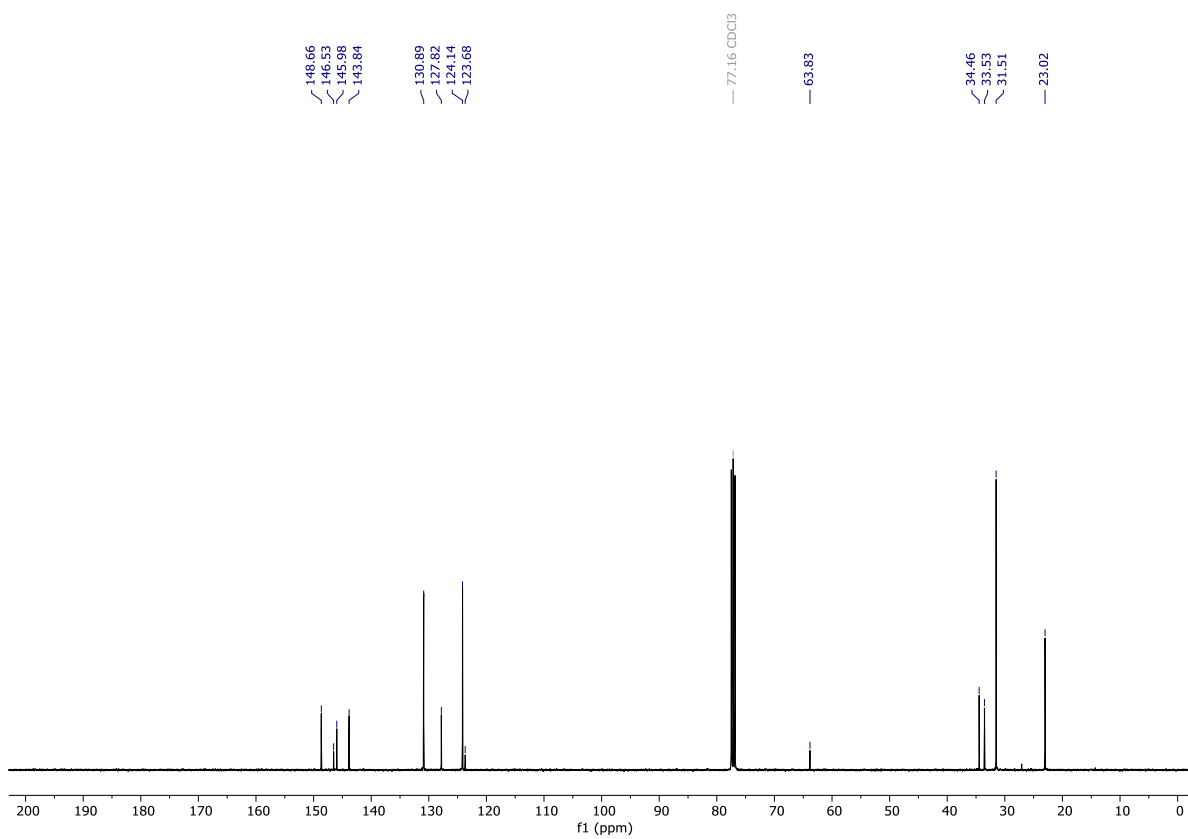



<sup>1</sup>H NMR (400 MHz, CDCl<sub>3</sub>) of C7\_N

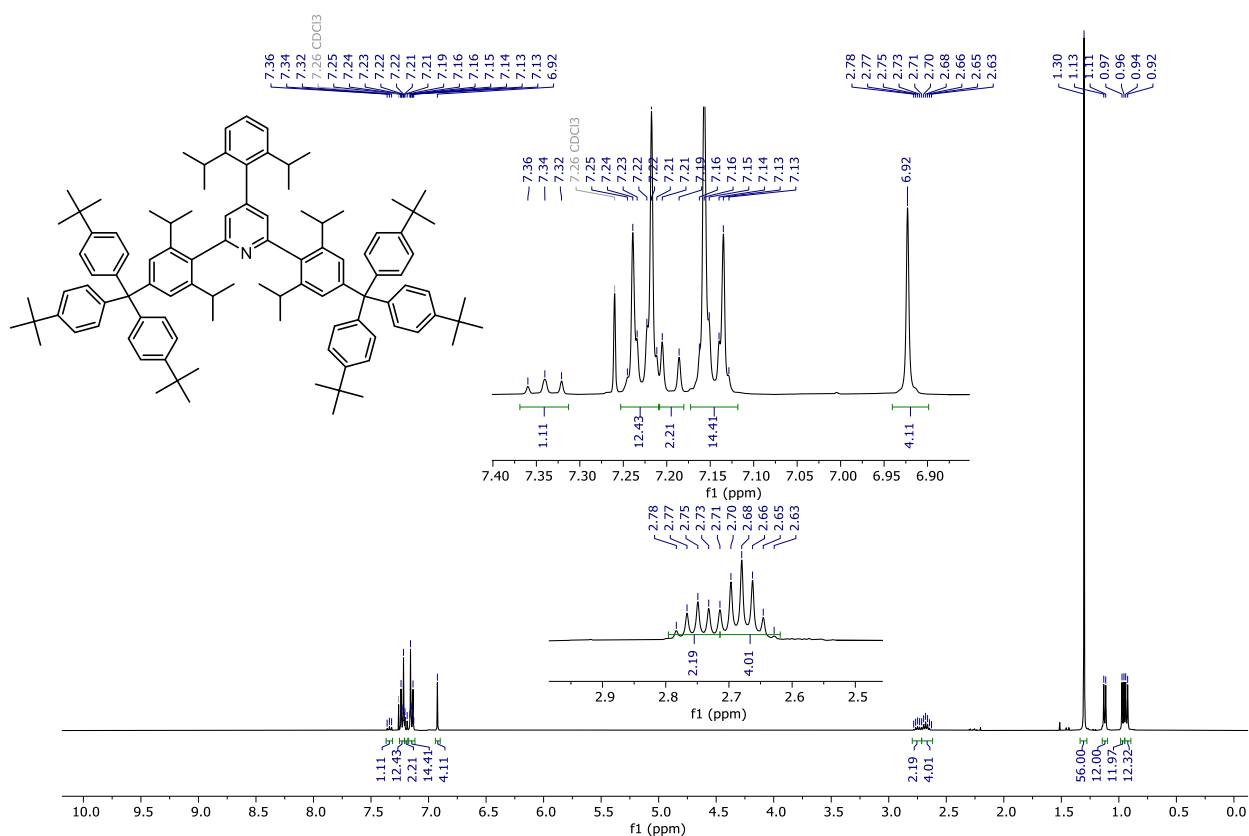

<sup>13</sup>C NMR (101 MHz, CDCl<sub>3</sub>) of C7\_N

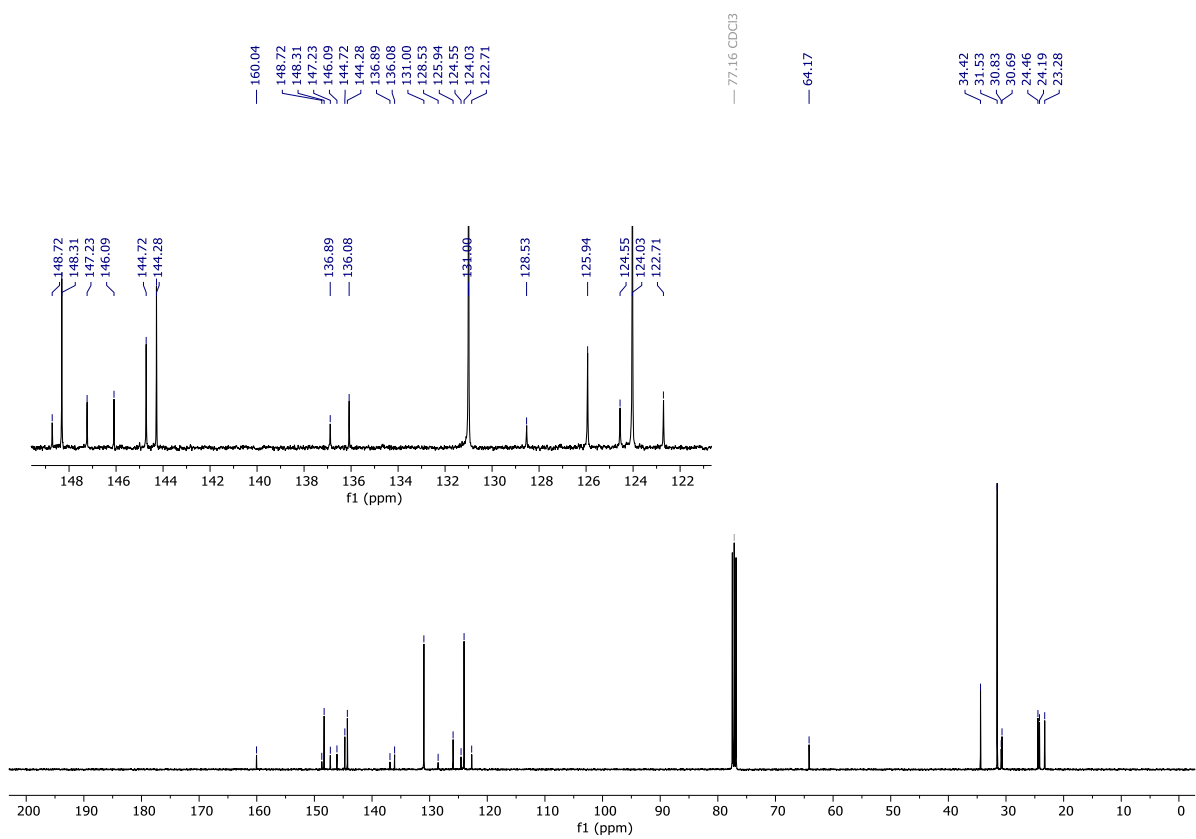

$^1\text{H}$  NMR (400 MHz,  $\text{CDCl}_3$ ) of  $\text{C7}^+\text{BF}_4^-$

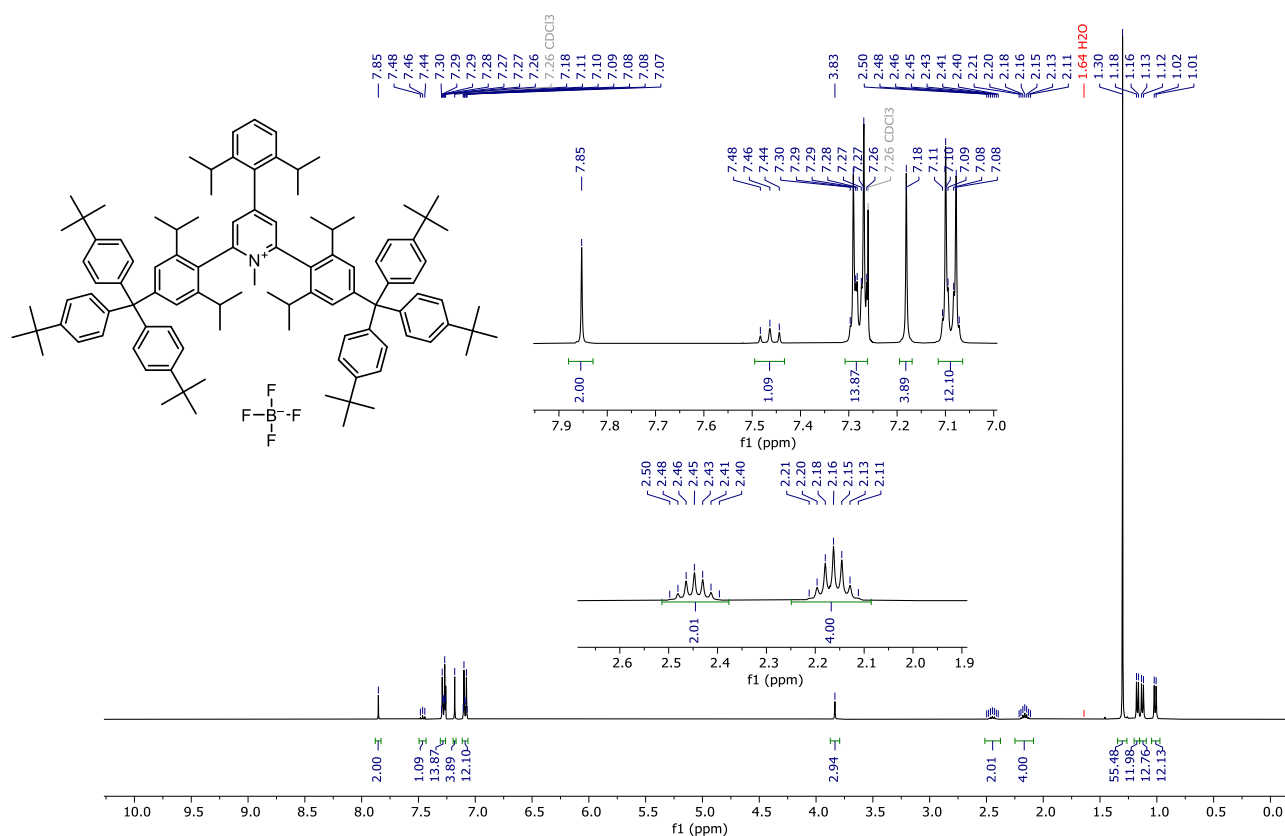

$^{13}\text{C}$  NMR (101 MHz,  $\text{CDCl}_3$ ) of  $\text{C7}^+\text{BF}_4^-$

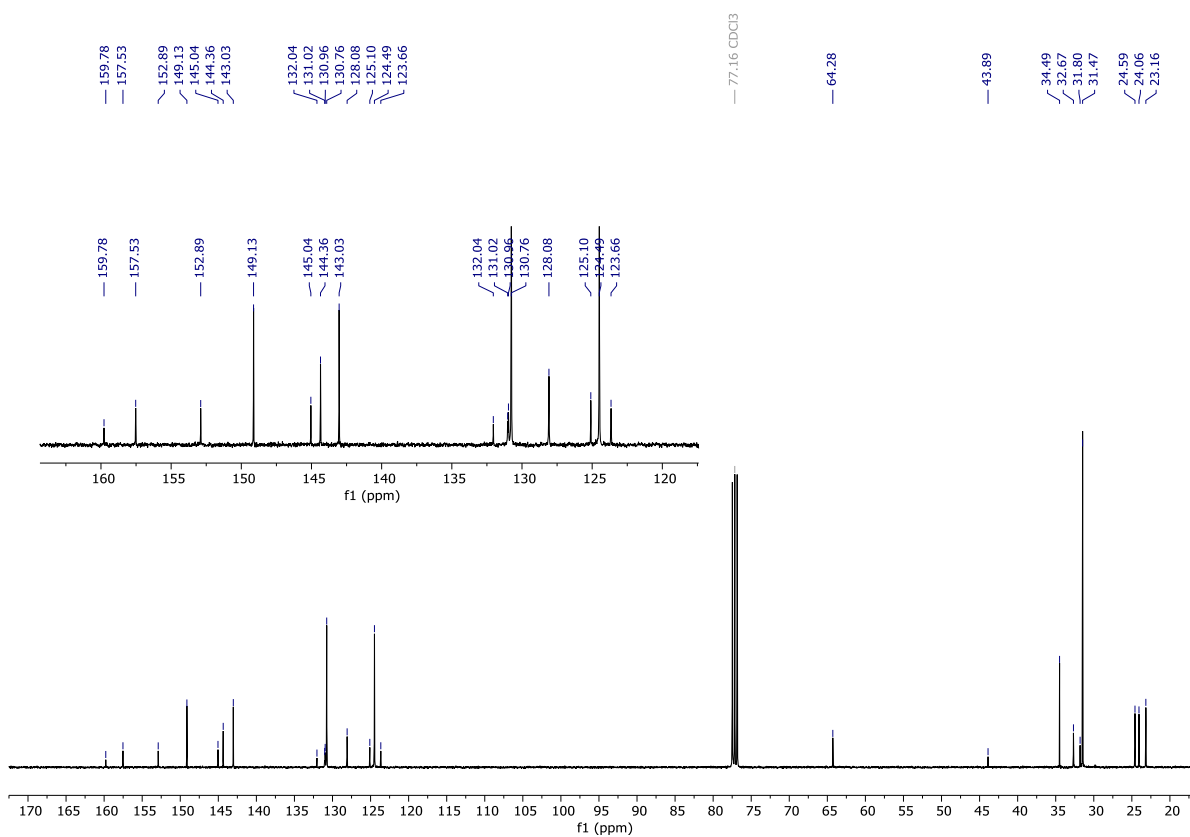

$^{19}\text{F}$  NMR (376 MHz,  $\text{CDCl}_3$ ) of  $\text{C7}^+\text{BF}_4^-$

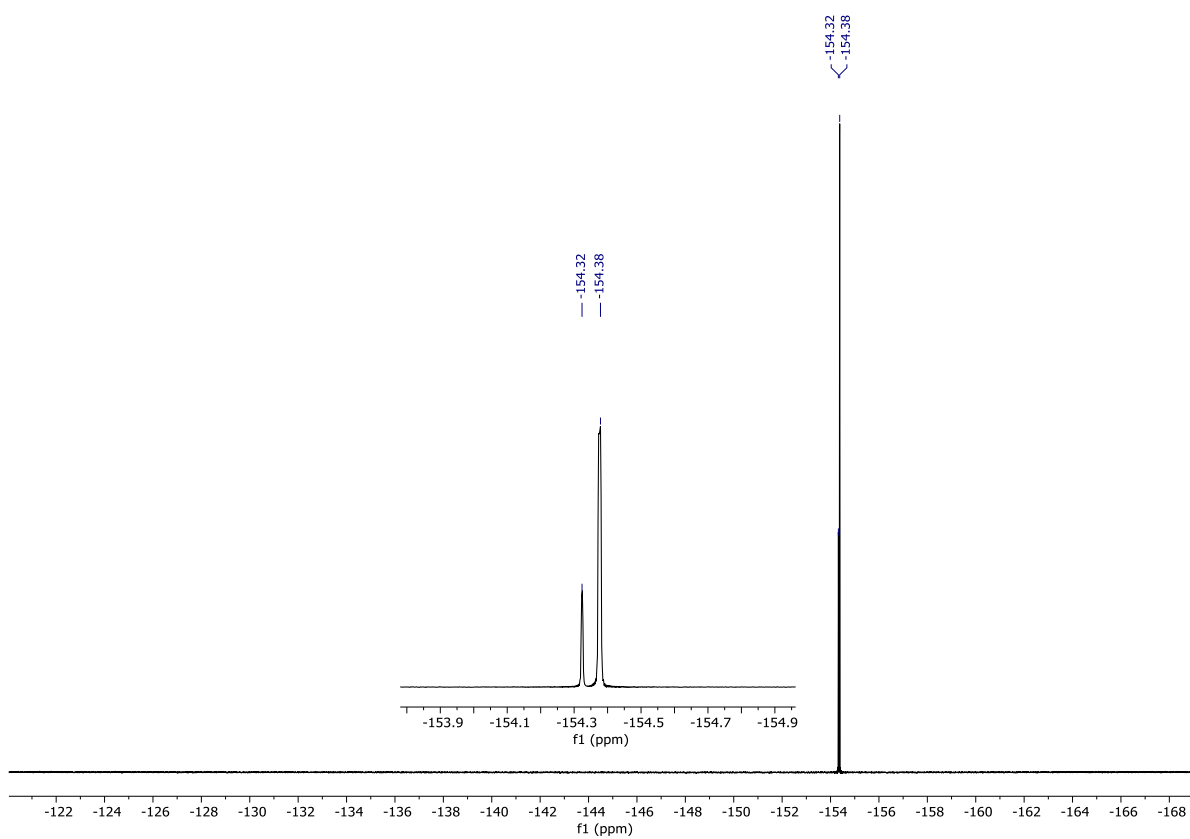

$^1\text{H}$  NMR (500 MHz,  $\text{CDCl}_3$ ) of 3',5'-dichloro-2,6-diisopropyl-1,1'-biphenyl

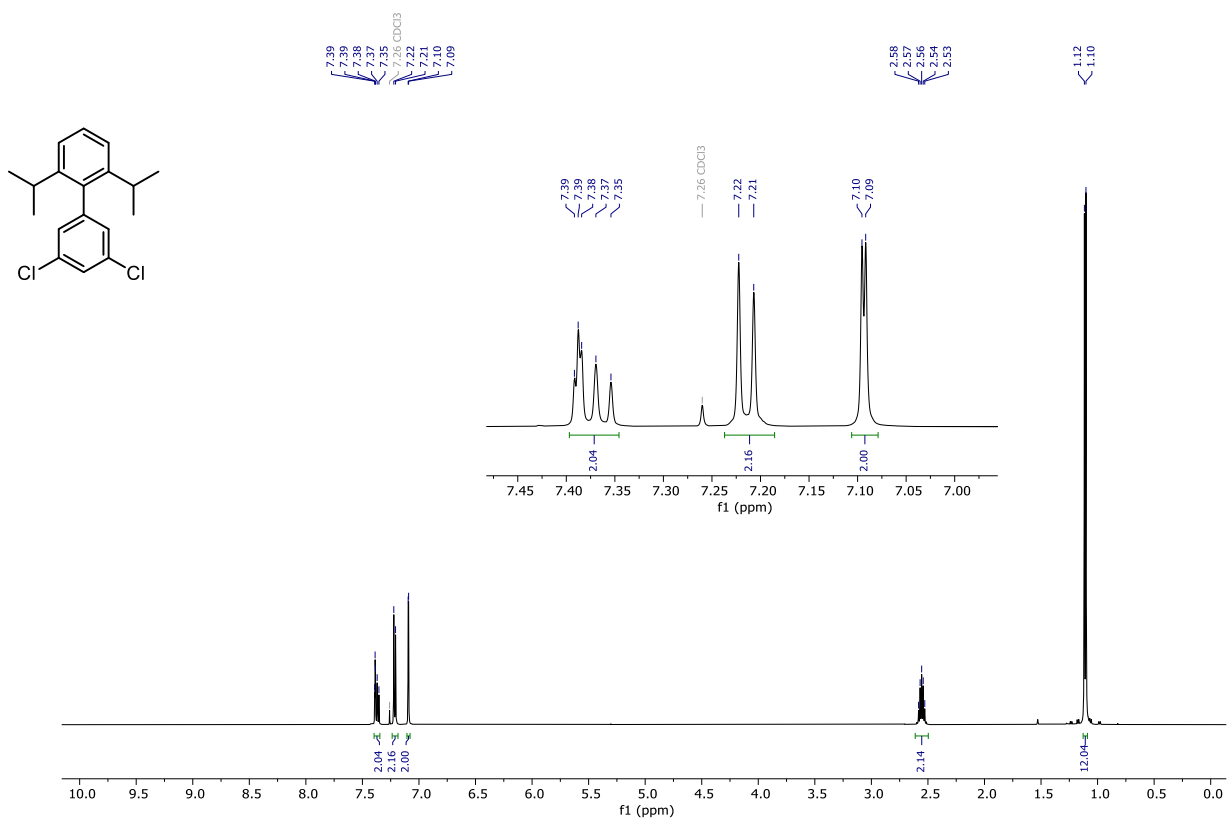

$^{13}\text{C}$  NMR (126 MHz,  $\text{CDCl}_3$ ) of 3',5'-dichloro-2,6-diisopropyl-1,1'-biphenyl

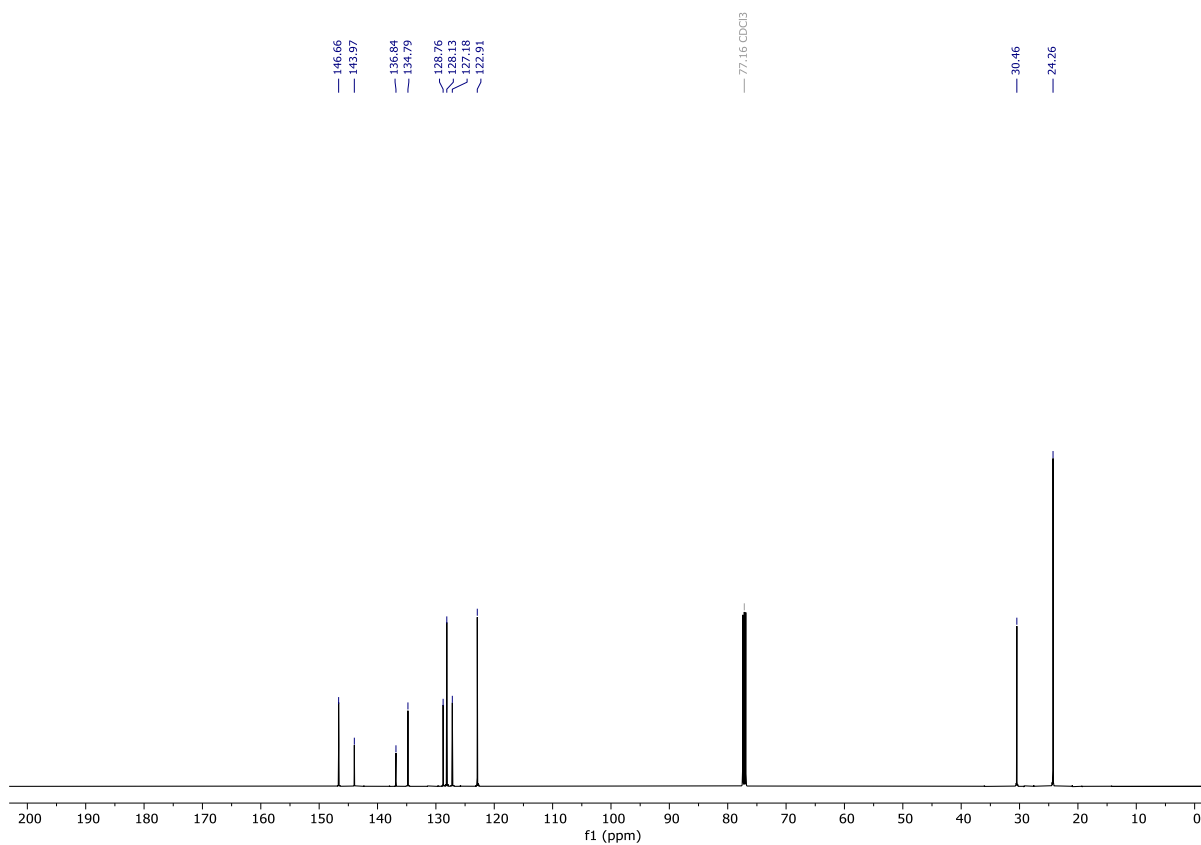

<sup>1</sup>H NMR (400 MHz, CDCl<sub>3</sub>) of **A4\_Br**

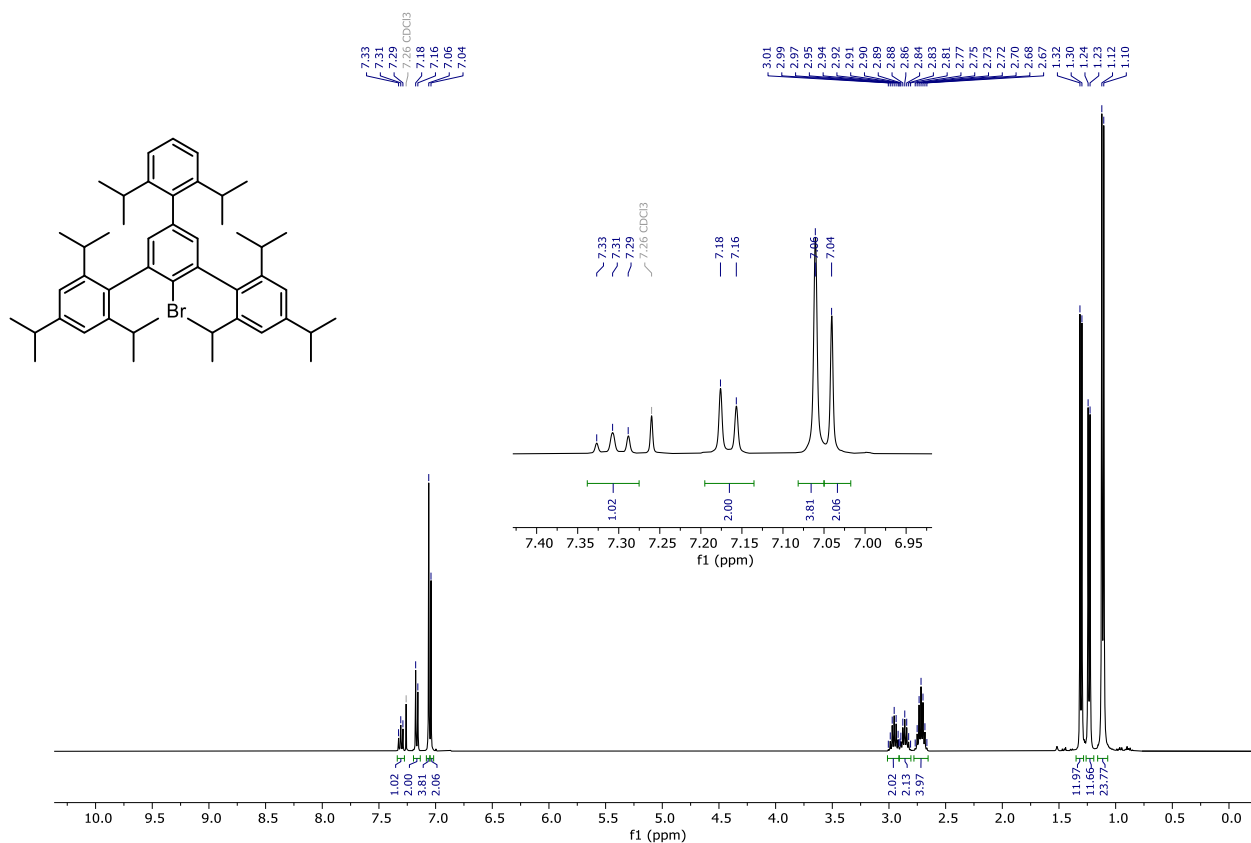

<sup>13</sup>C NMR (101 MHz, CDCl<sub>3</sub>) of **A4\_Br**

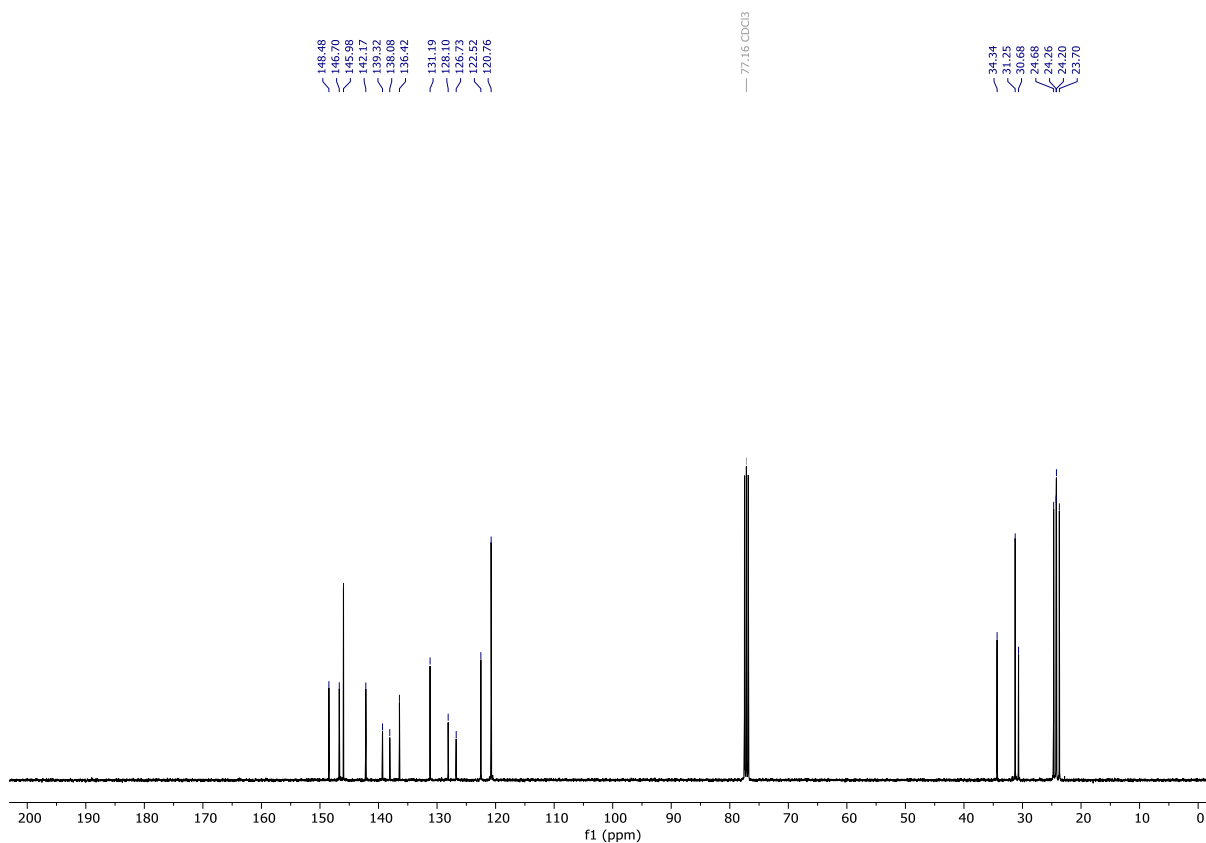

$^1\text{H}$  NMR (400 MHz,  $\text{CDCl}_3$ ) of **A4\_SO<sub>2</sub>Cl**

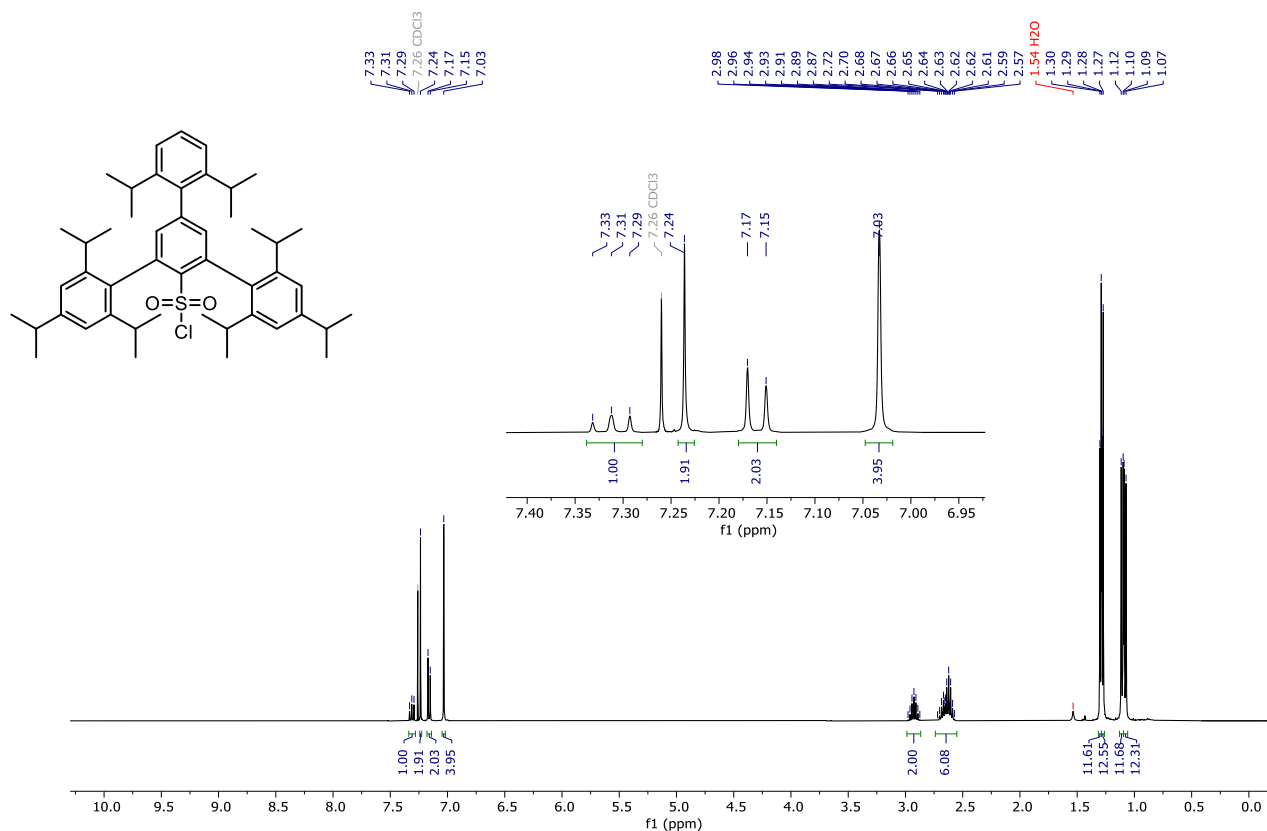

$^{13}\text{C}$  NMR (101 MHz,  $\text{CDCl}_3$ ) of **A4\_SO<sub>2</sub>Cl**

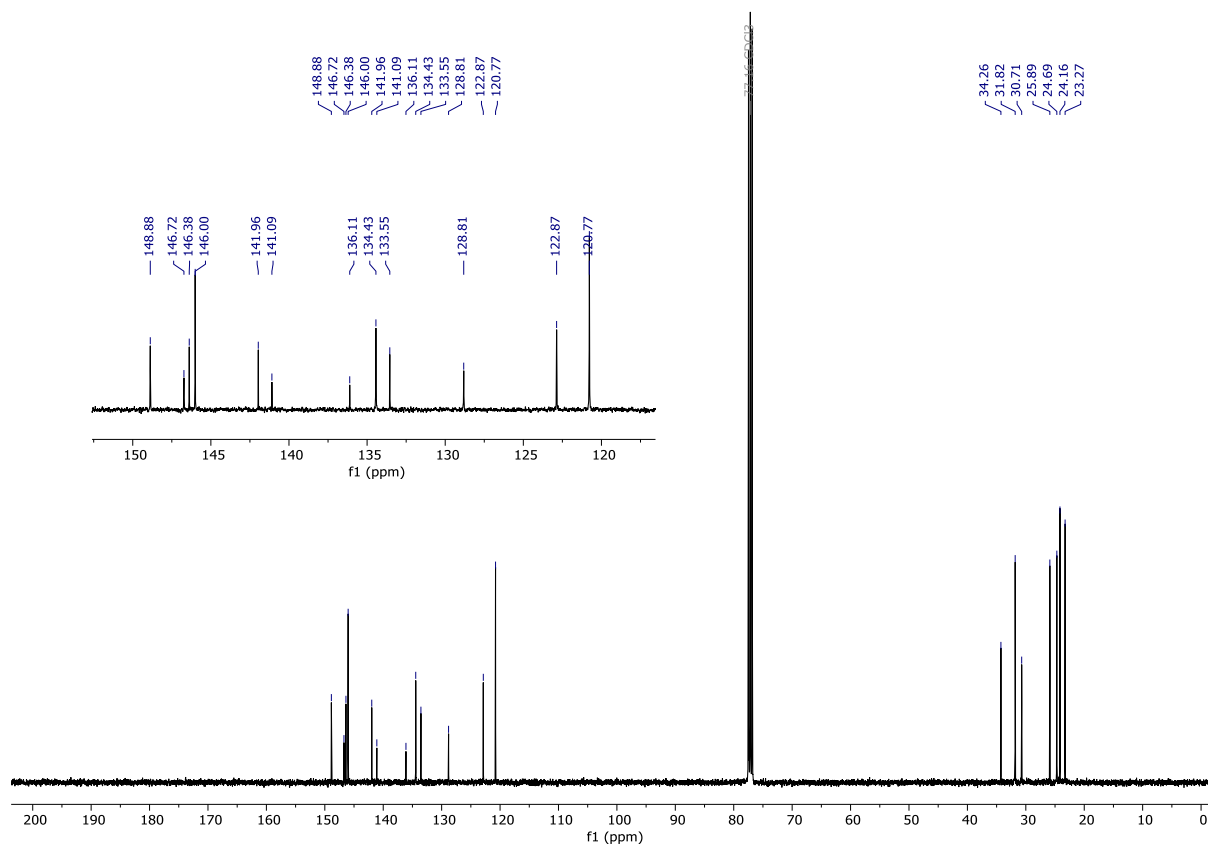

$^1\text{H}$  NMR (500 MHz,  $\text{CDCl}_3$ ) of  $\text{Na}^+\text{A4}^-$

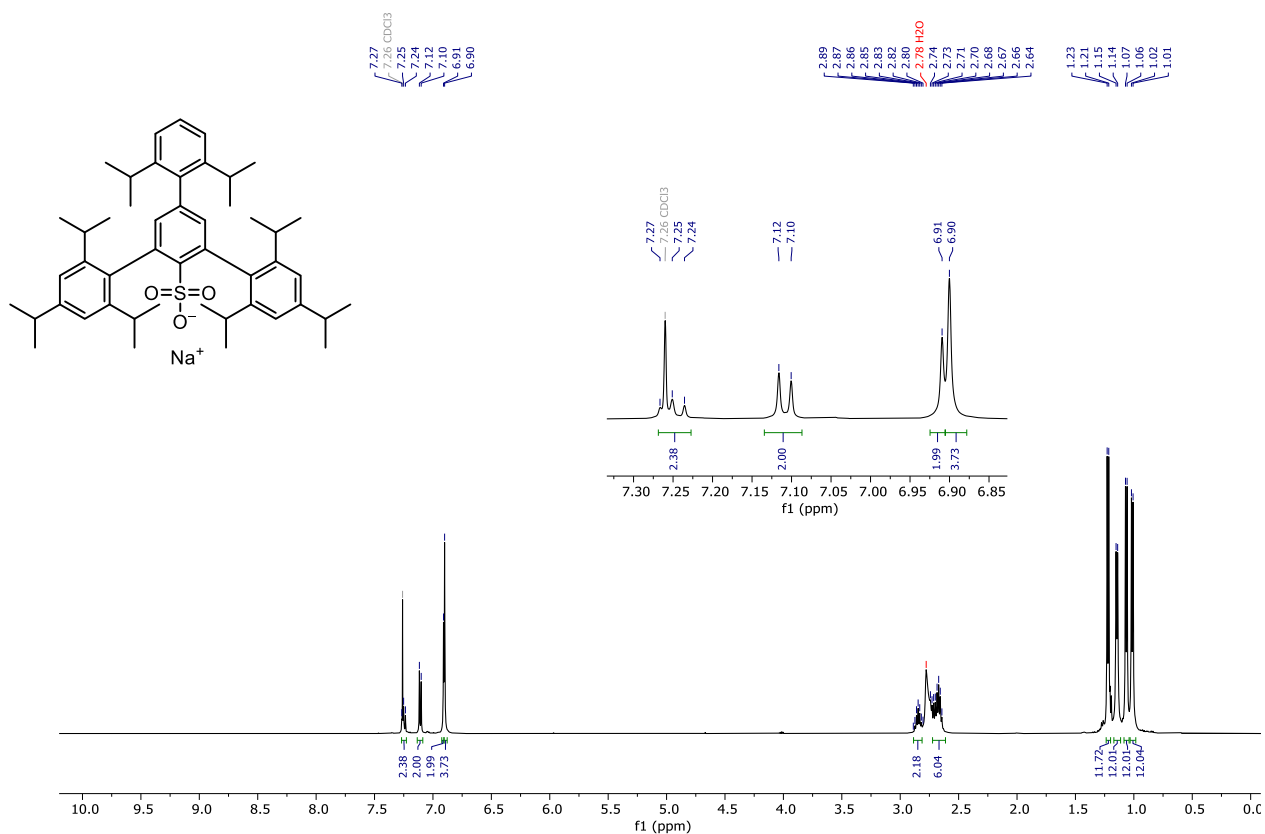

$^{13}\text{C}$  NMR (126 MHz,  $\text{CDCl}_3$ ) of  $\text{Na}^+\text{A4}^-$

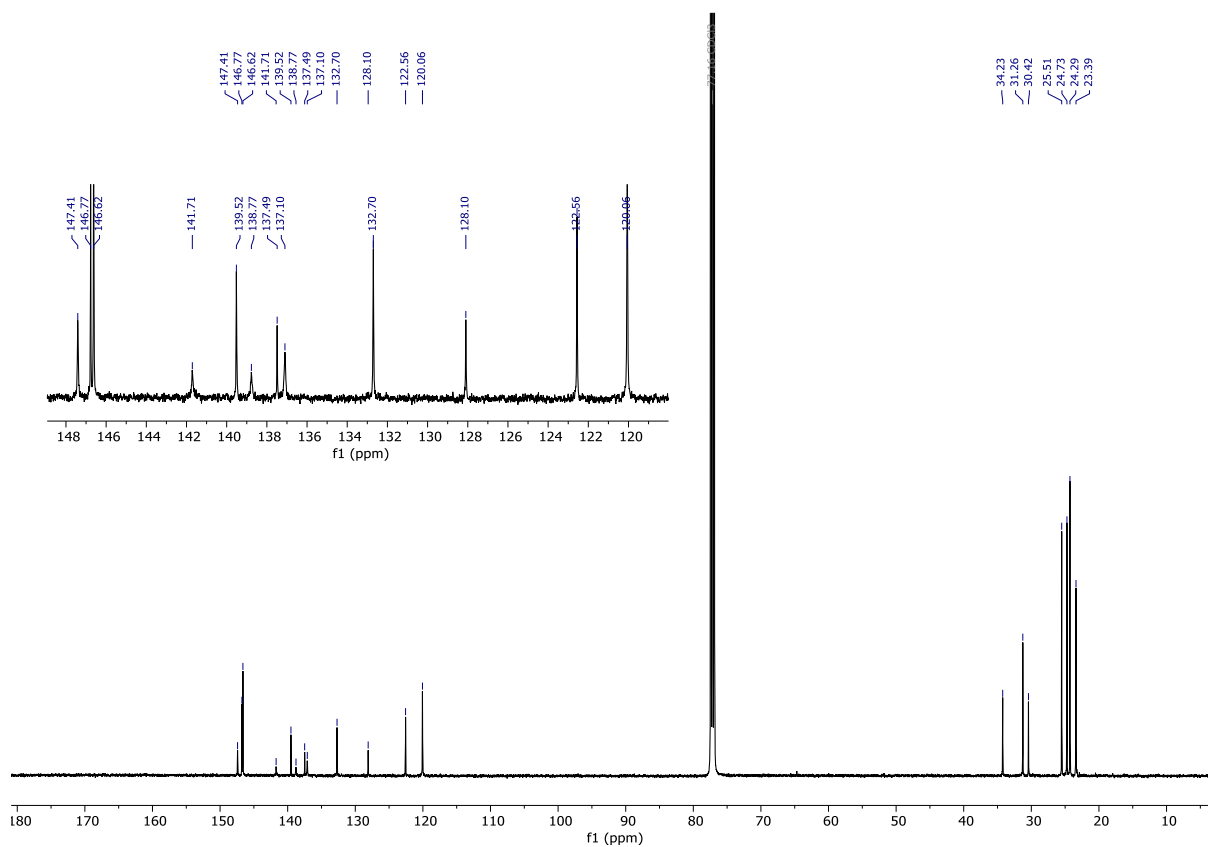

$^1\text{H}$  NMR (400 MHz,  $\text{CDCl}_3$ ) of 3',5'-dichloro-2,4,6-triisopropyl-1,1'-biphenyl

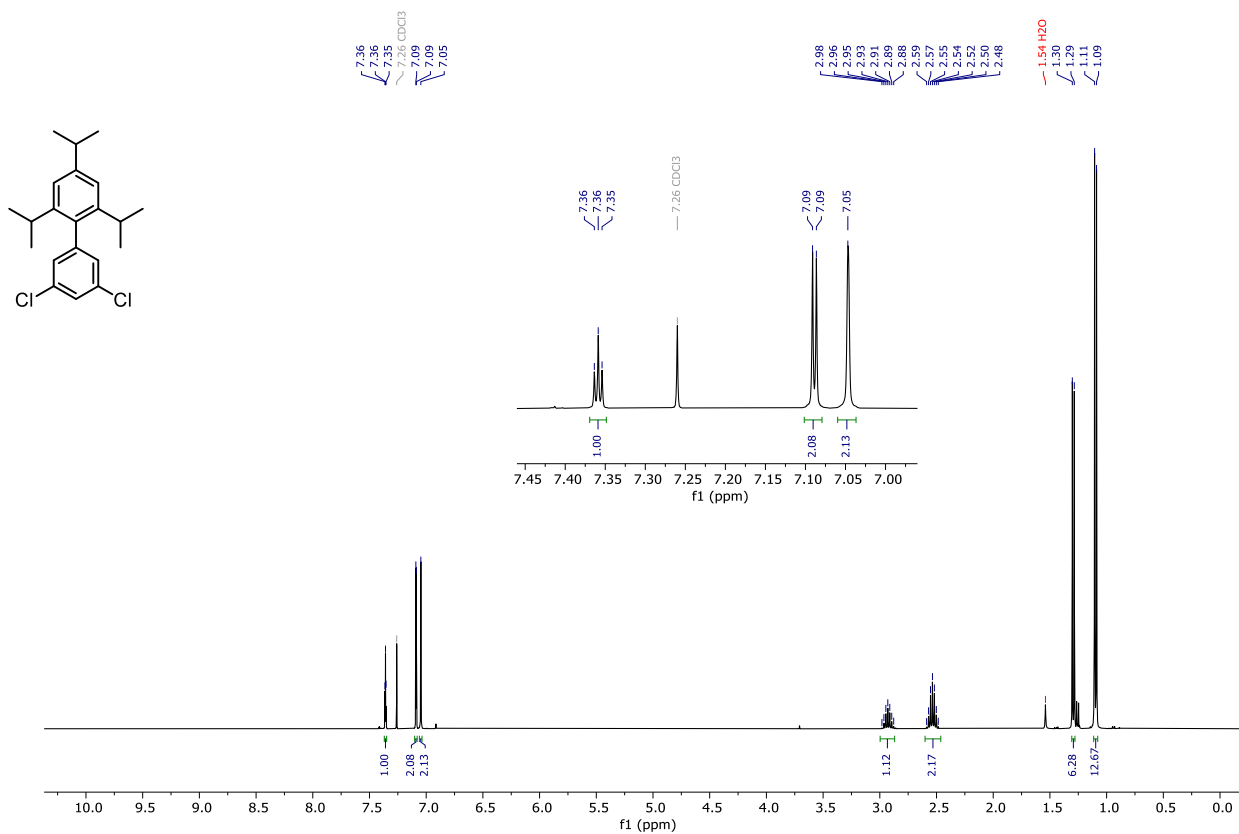

$^{13}\text{C}$  NMR (101 MHz,  $\text{CDCl}_3$ ) of 3',5'-dichloro-2,4,6-triisopropyl-1,1'-biphenyl

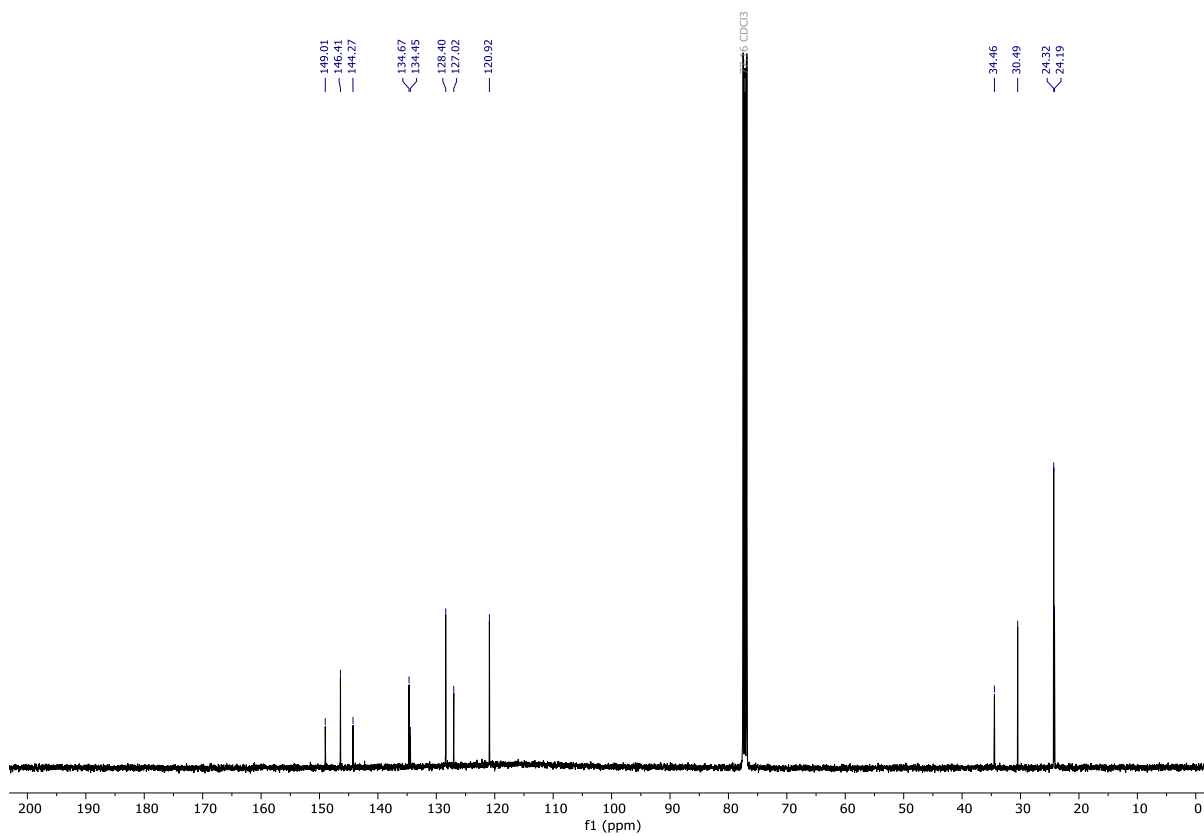



$^1\text{H}$  NMR (500 MHz,  $\text{CDCl}_3$ ) of **A5\_Br**

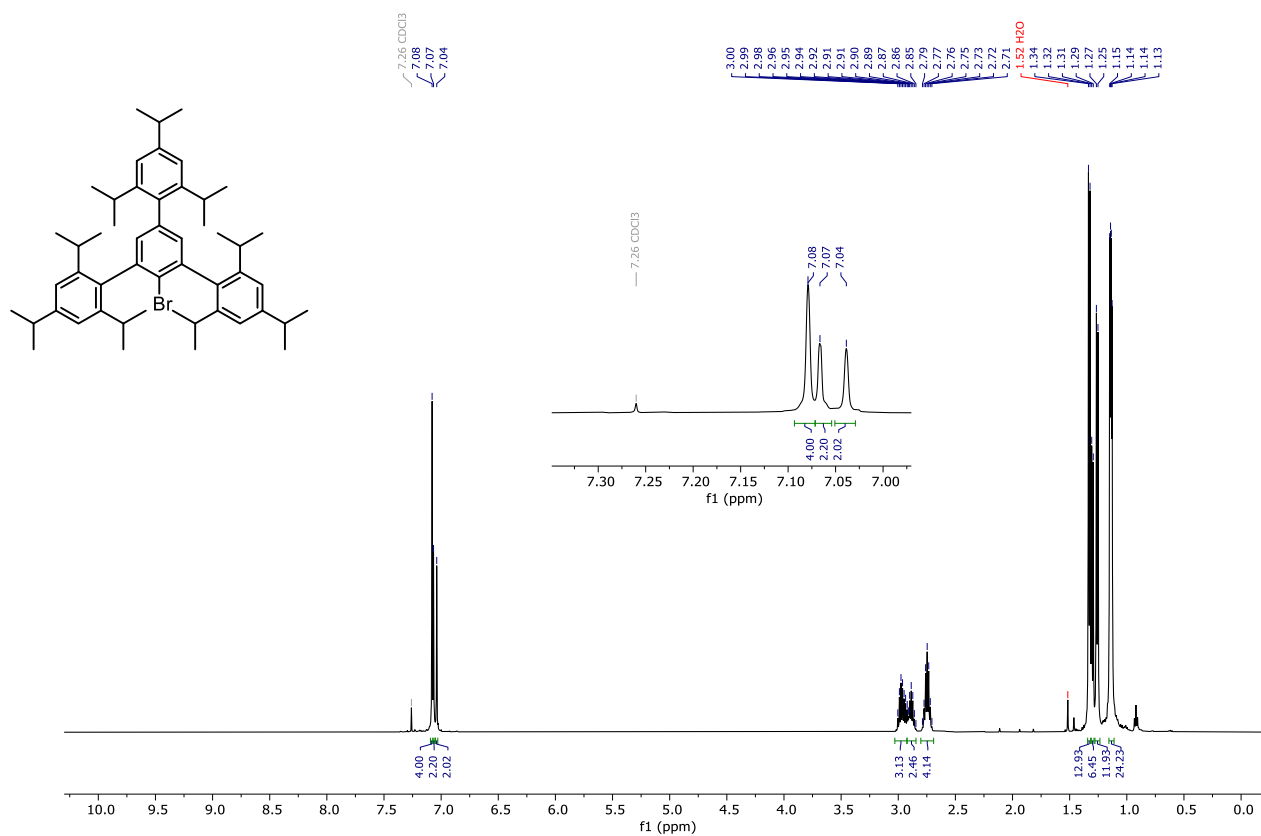

$^{13}\text{C}$  NMR (126 MHz,  $\text{CDCl}_3$ ) of **A5\_Br**

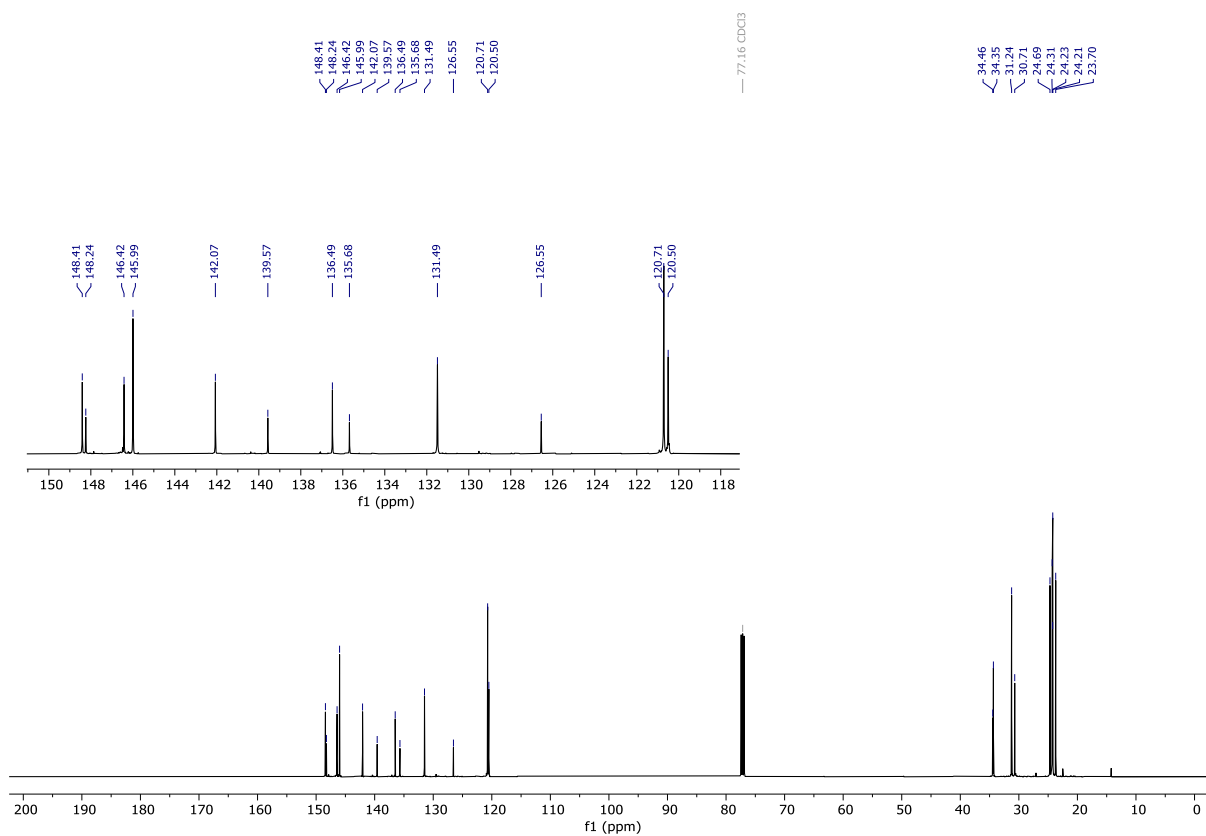

<sup>1</sup>H NMR (500 MHz, CDCl<sub>3</sub>) of A5\_SO<sub>2</sub>Cl

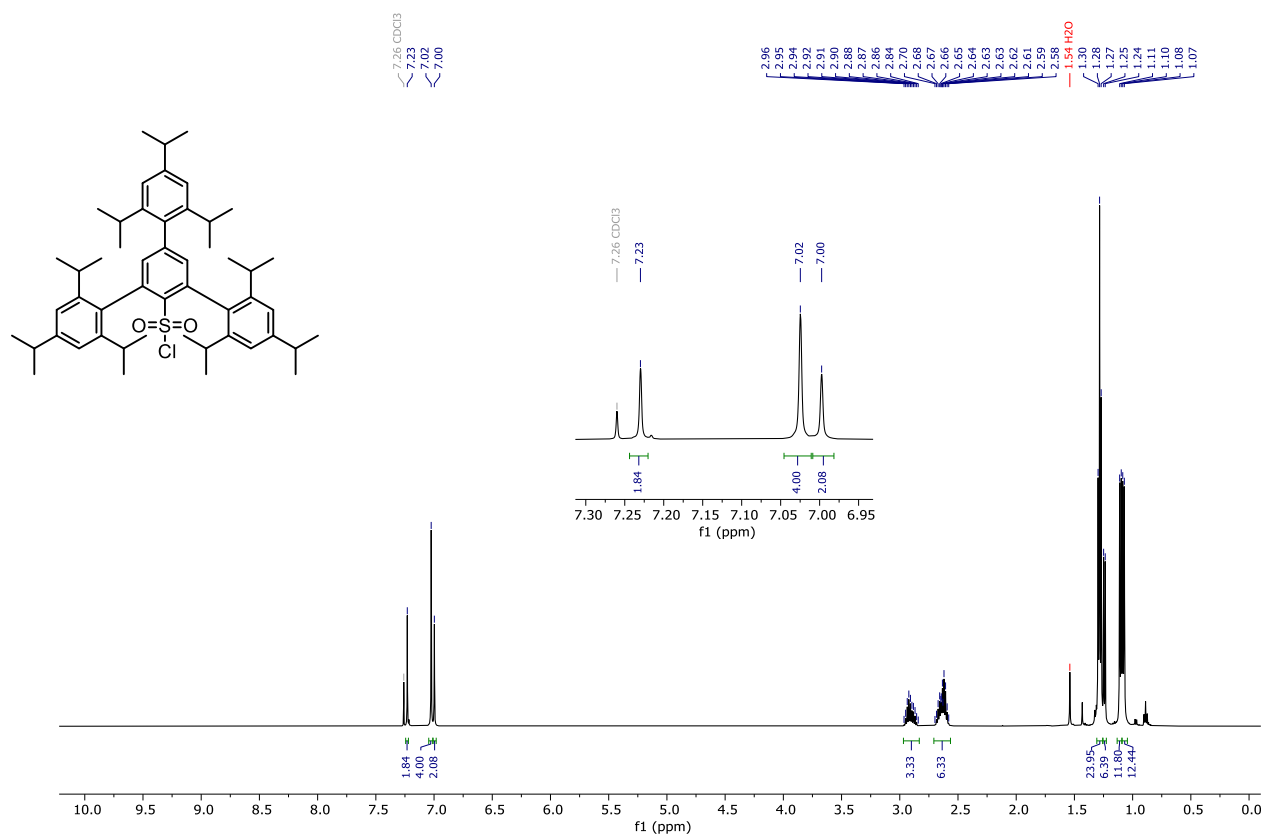

<sup>13</sup>C NMR (126 MHz, CDCl<sub>3</sub>) of A5\_SO<sub>2</sub>Cl

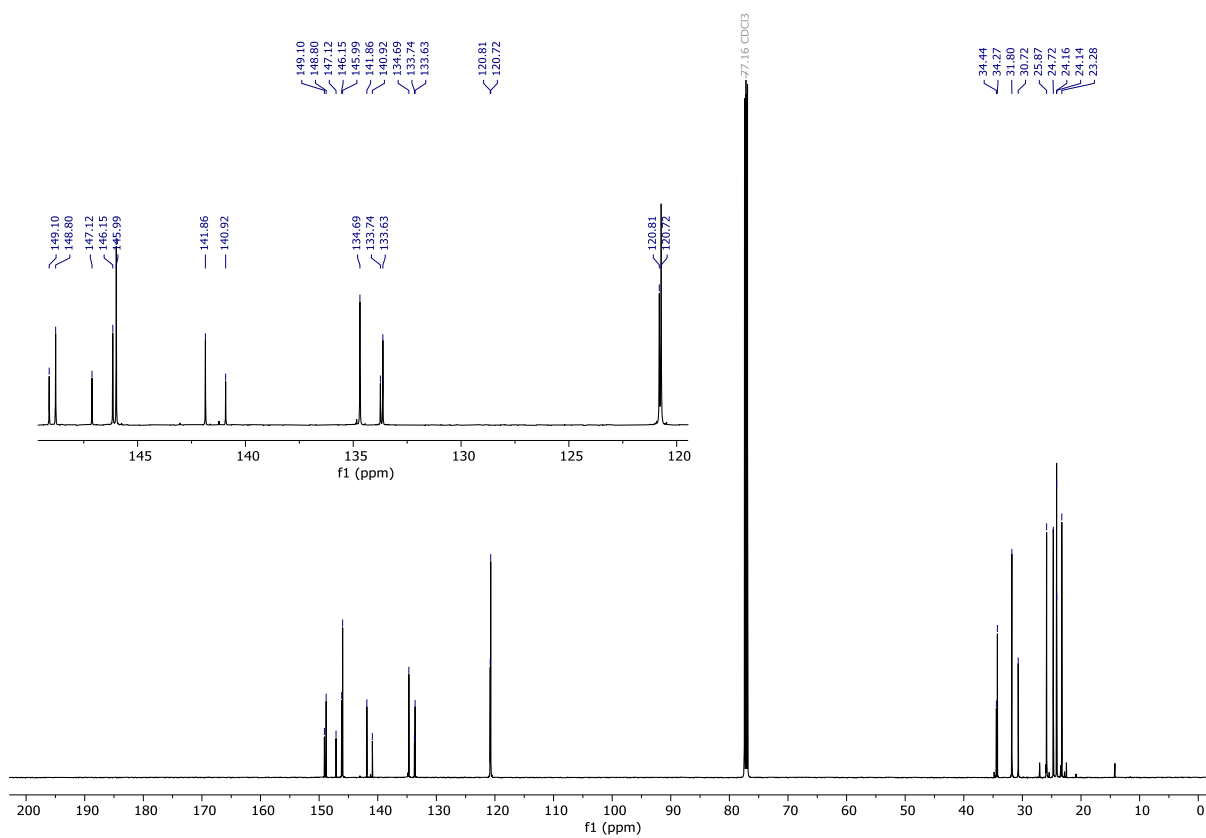

$^1\text{H}$  NMR (500 MHz,  $\text{CDCl}_3$ ) of  $\text{Na}^+\text{A}5^-$

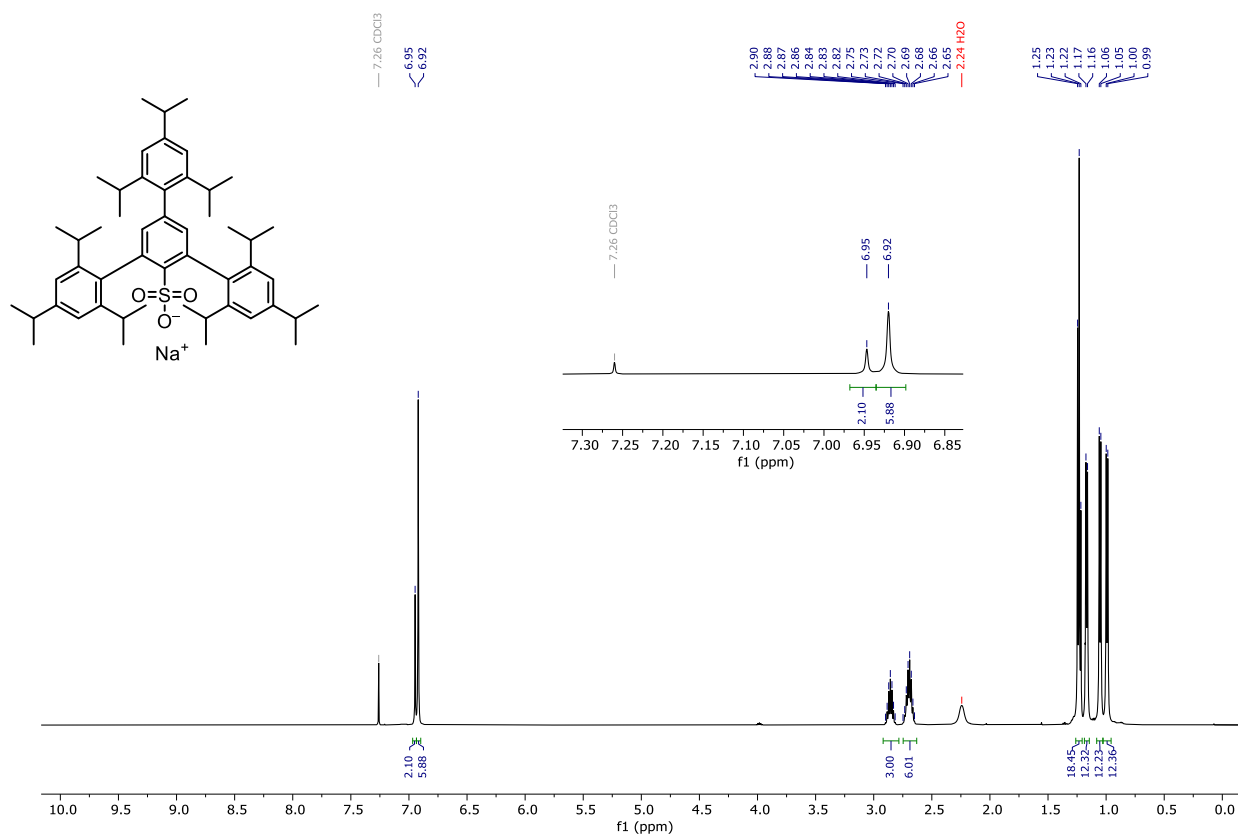

$^{13}\text{C}$  NMR (126 MHz,  $\text{CDCl}_3$ ) of  $\text{Na}^+\text{A}5^-$

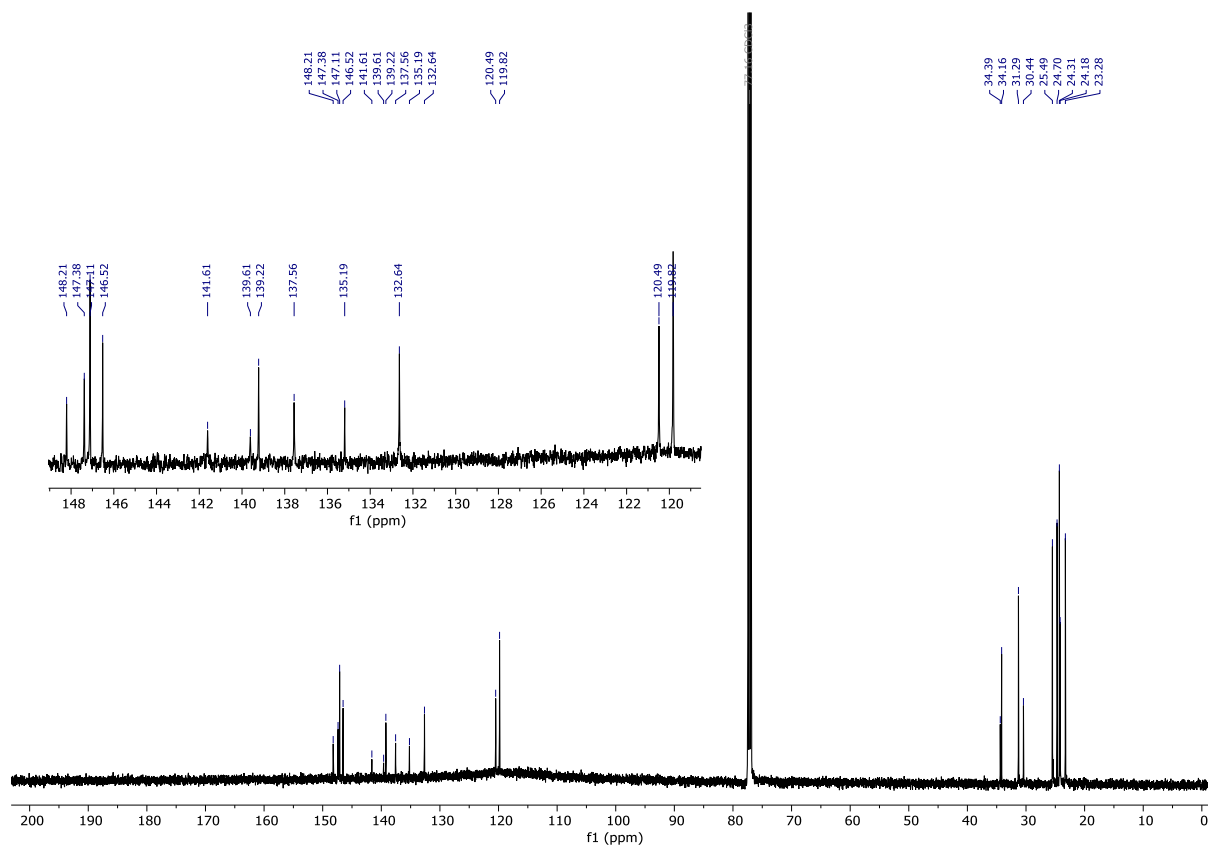

$^1\text{H}$  NMR (400 MHz,  $\text{CDCl}_3$ ) of **A6\_Br** (in a mixture with a side product in which there is H instead of Br)

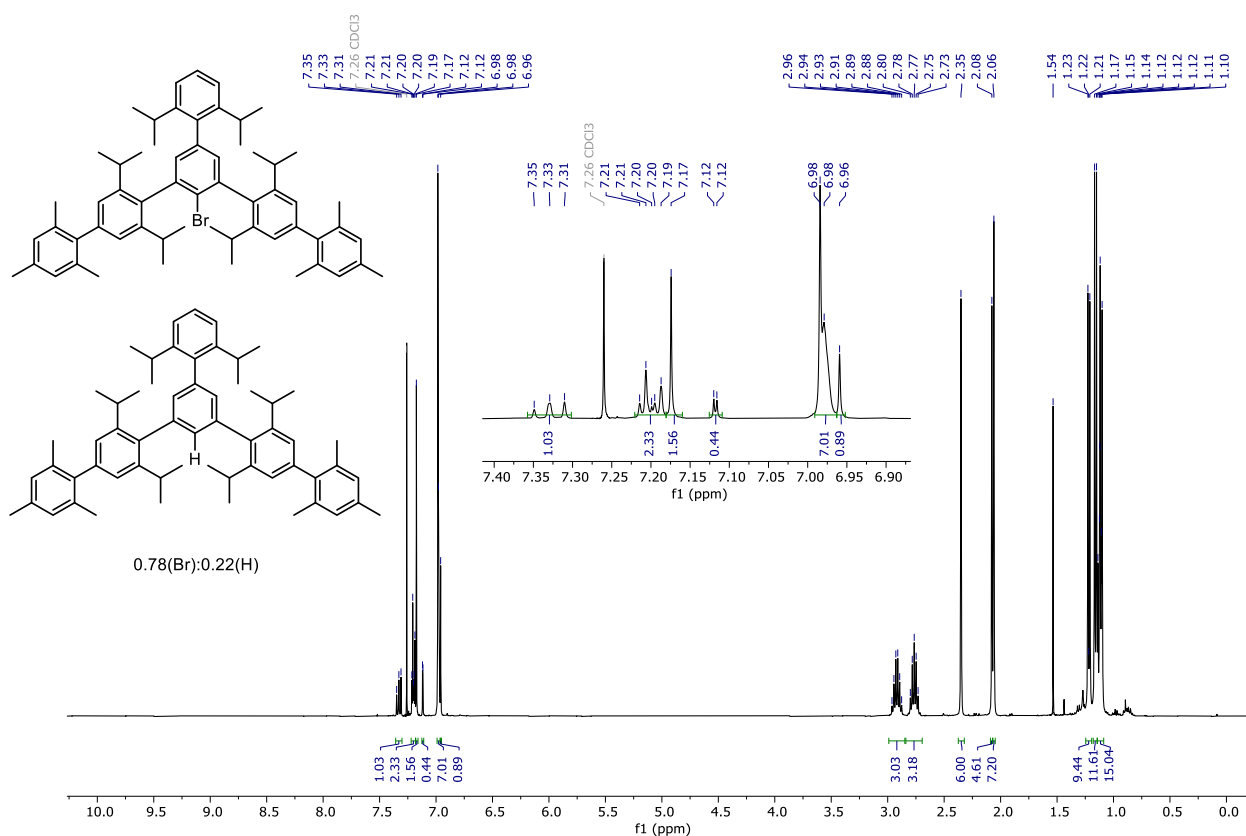

$^{13}\text{C}$  NMR (101 MHz,  $\text{CDCl}_3$ ) of **A6\_Br** (in a mixture with a side product in which there is H instead of Br)

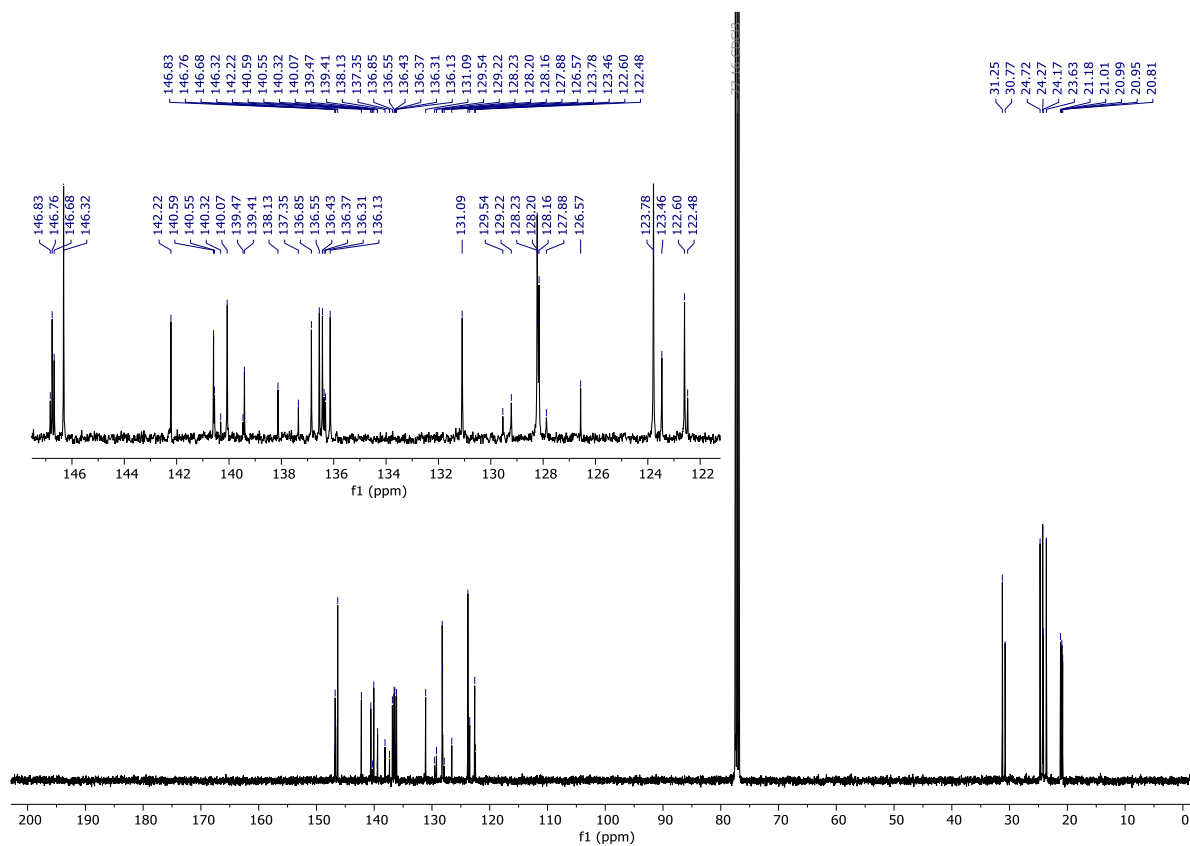

<sup>1</sup>H NMR (400 MHz, CDCl<sub>3</sub>) of A6\_SO<sub>2</sub>Cl

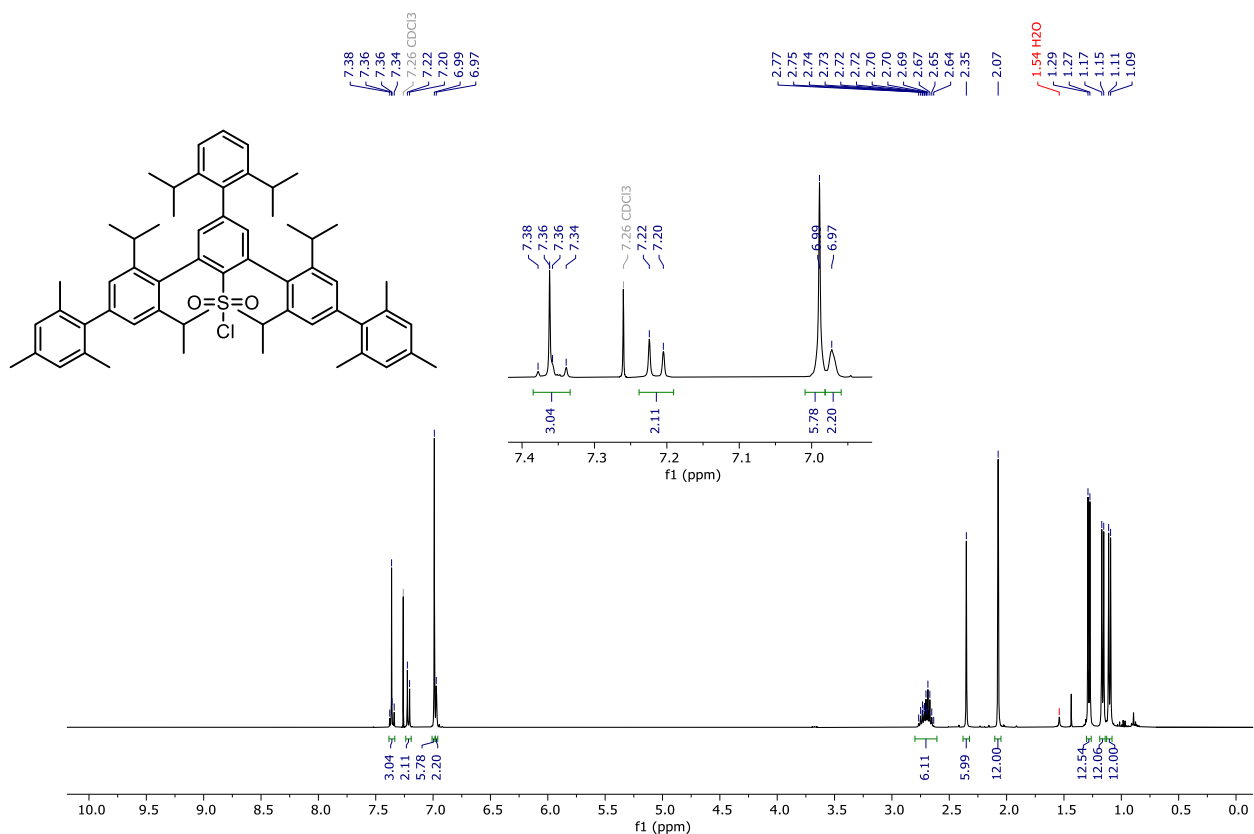

<sup>13</sup>C NMR (101 MHz, CDCl<sub>3</sub>) of A6\_SO<sub>2</sub>Cl

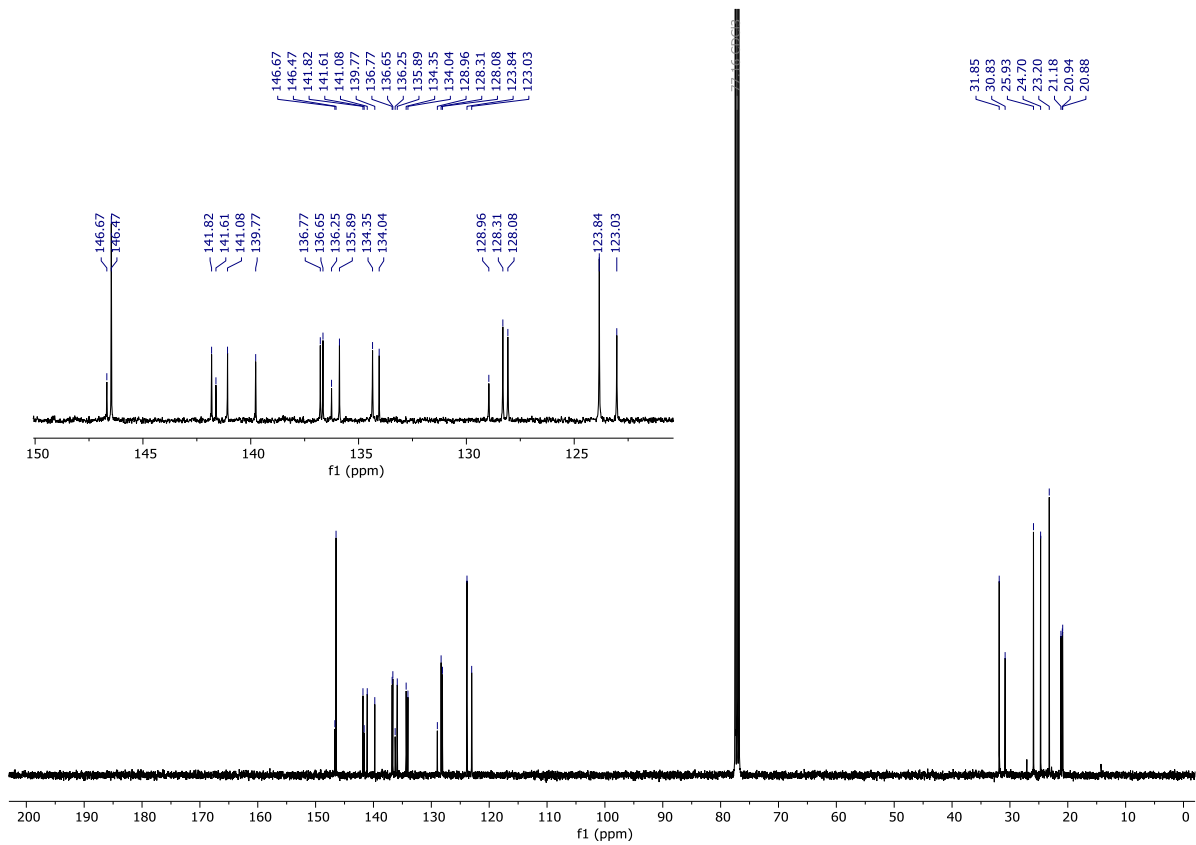

$^1\text{H}$  NMR (400 MHz,  $\text{CDCl}_3$ ) of  $\text{Na}^+\text{A6}^-$

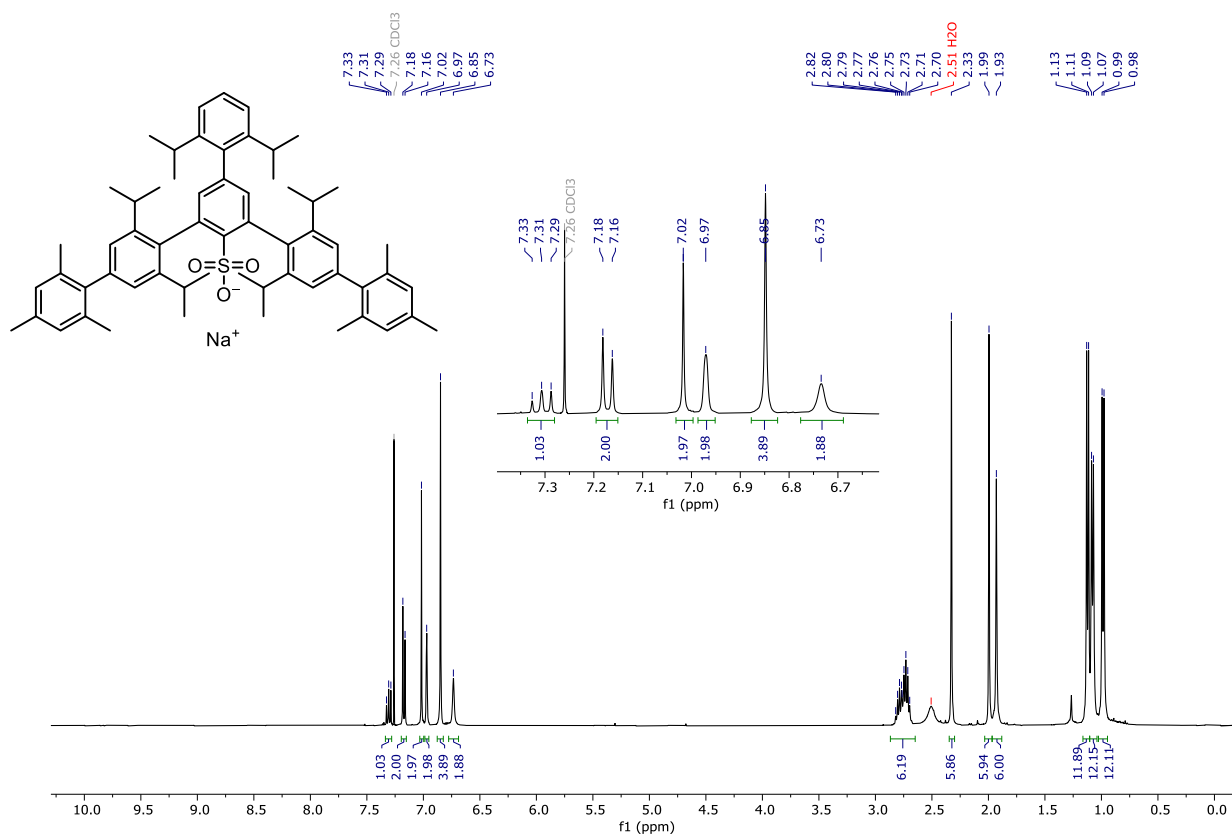

$^{13}\text{C}$  NMR (101 MHz,  $\text{CDCl}_3$ ) of  $\text{Na}^+\text{A6}^-$

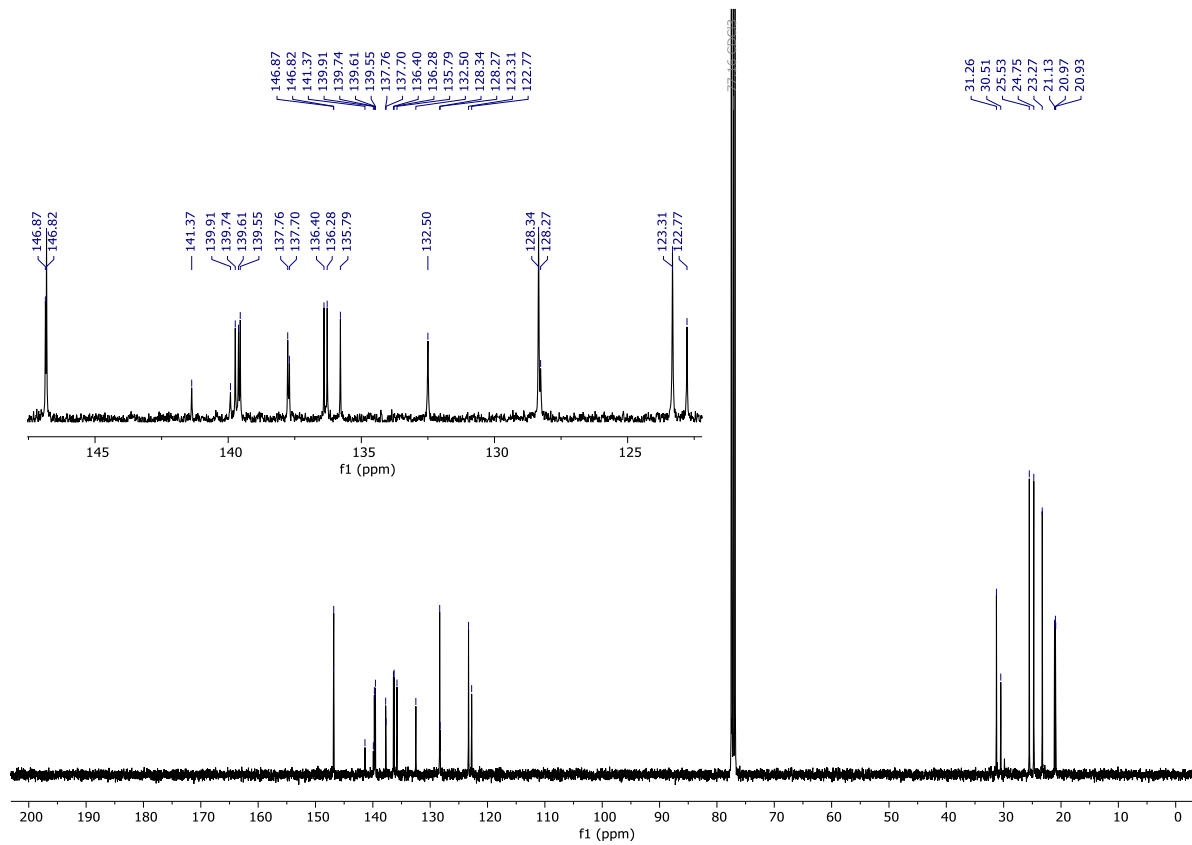

<sup>1</sup>H NMR (400 MHz, CDCl<sub>3</sub>) of **A7\_Br**

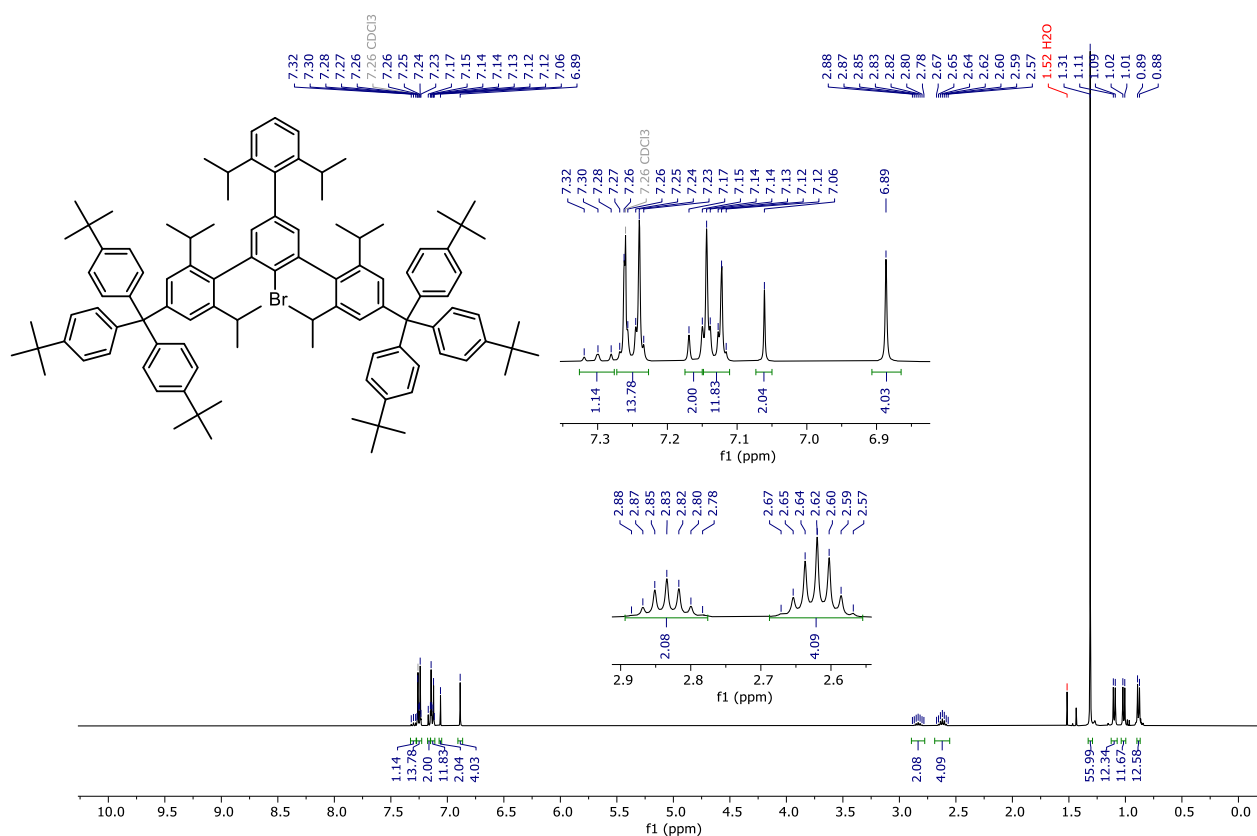

<sup>13</sup>C NMR (101 MHz, CDCl<sub>3</sub>) of **A7\_Br**

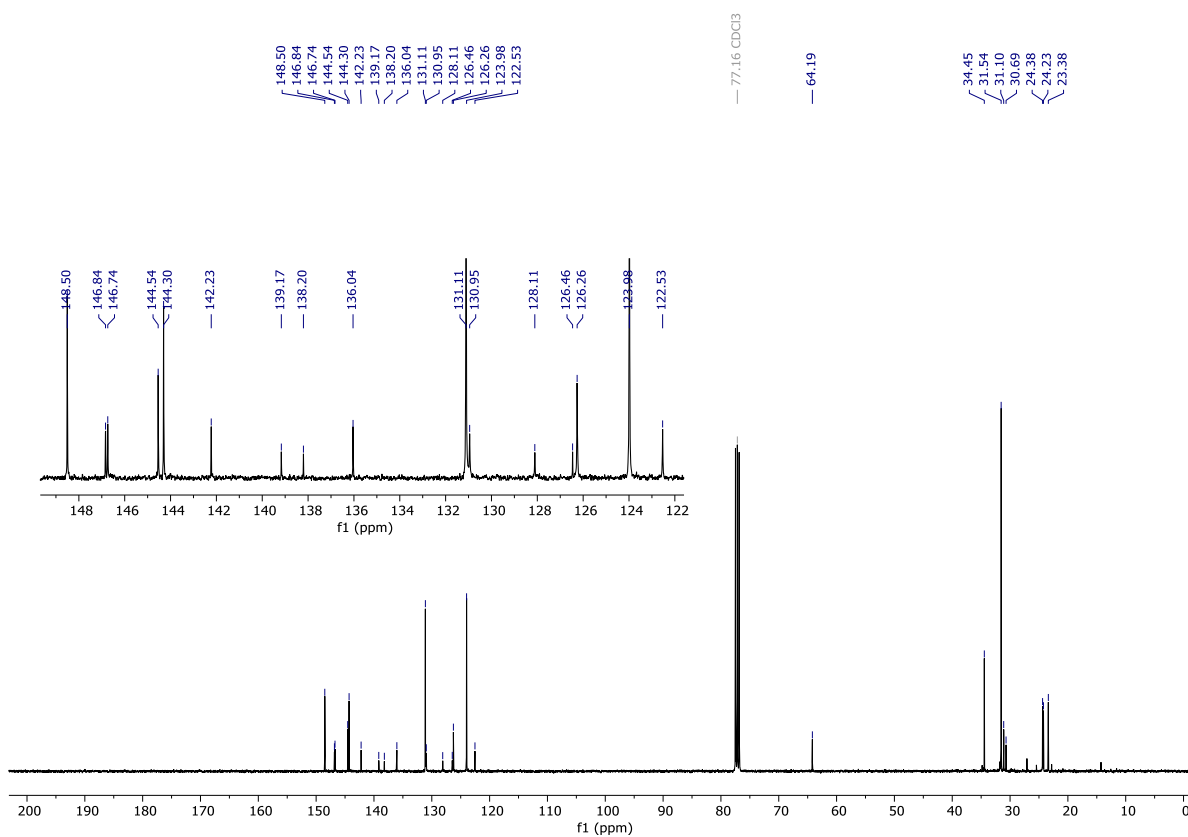

$^1\text{H}$  NMR (400 MHz,  $\text{CDCl}_3$ ) of **A7\_SO<sub>2</sub>Cl**

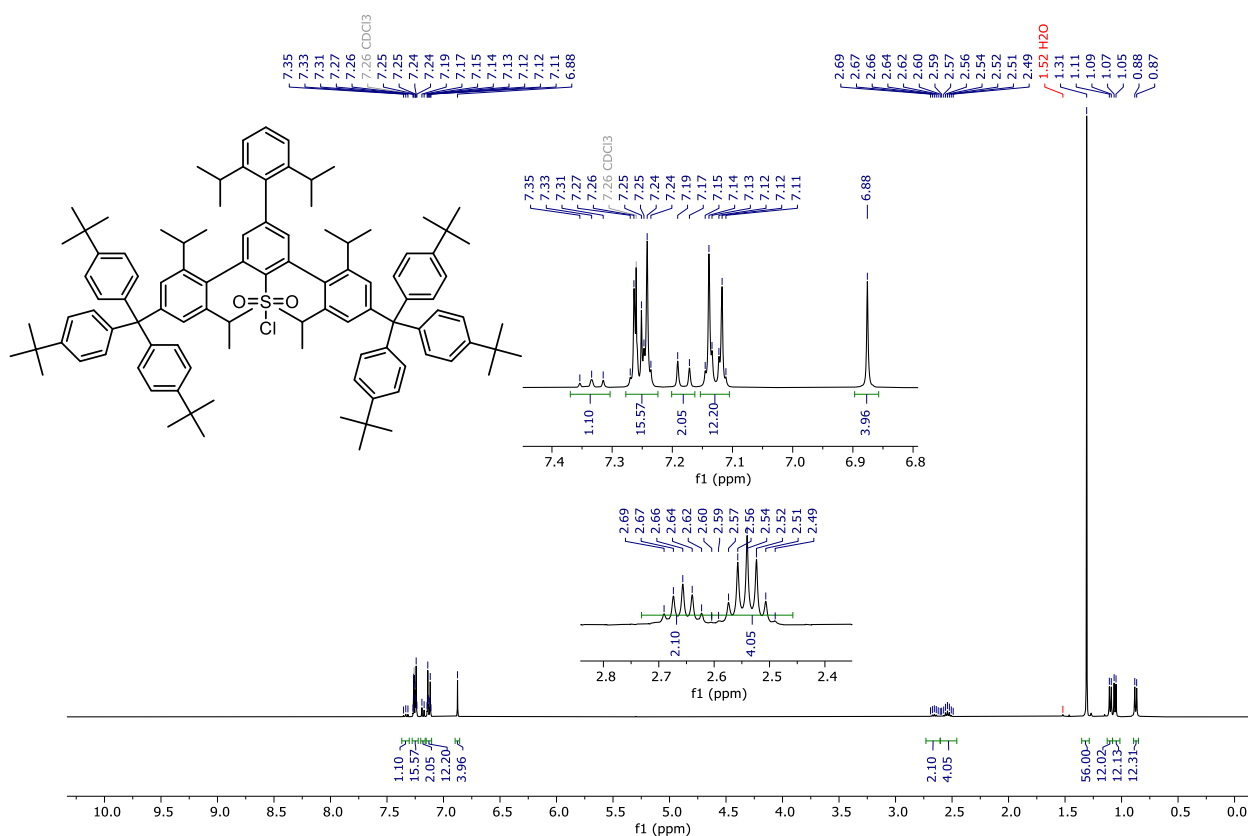

$^{13}\text{C}$  NMR (101 MHz,  $\text{CDCl}_3$ ) of **A7\_SO<sub>2</sub>Cl**

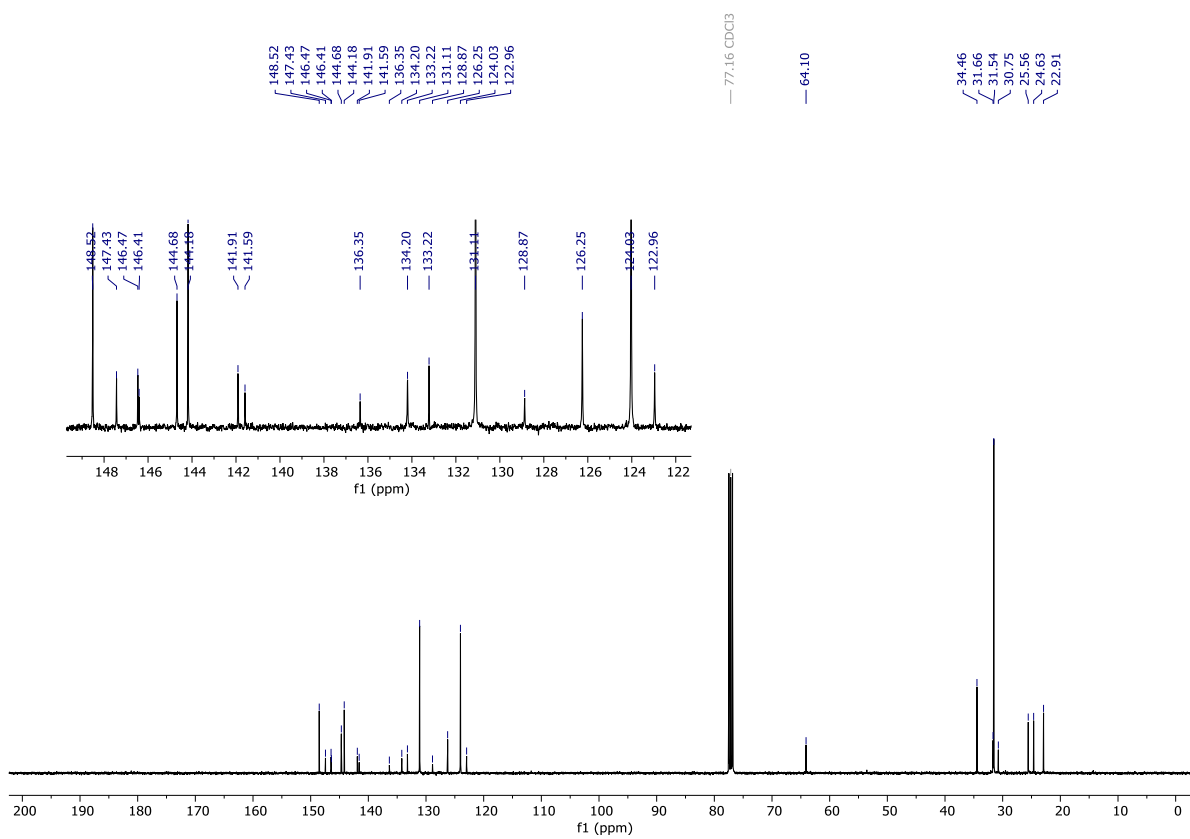



$^1\text{H}$  NMR (400 MHz,  $\text{CDCl}_3$ ) of  $\text{Na}^+\text{A7}^-$

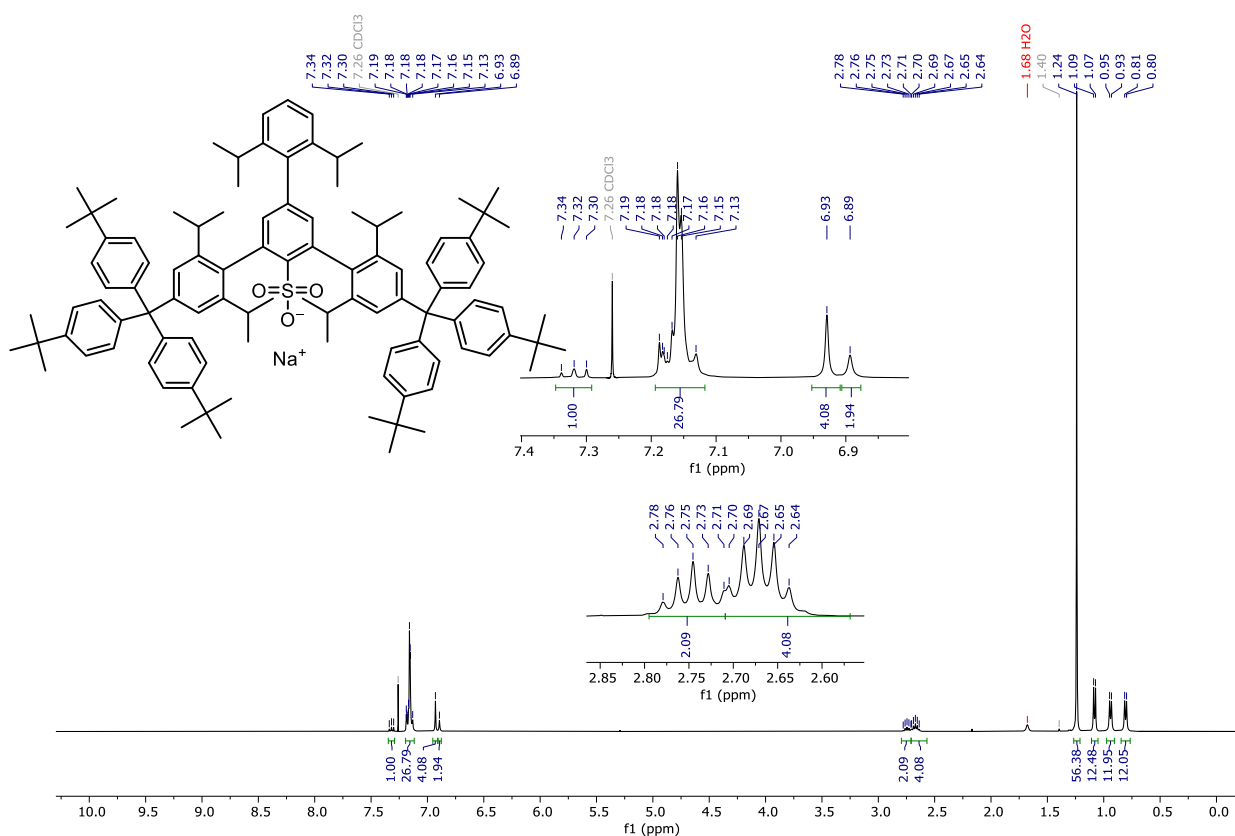

$^{13}\text{C}$  NMR (101 MHz,  $\text{CDCl}_3$ ) of  $\text{Na}^+\text{A7}^-$

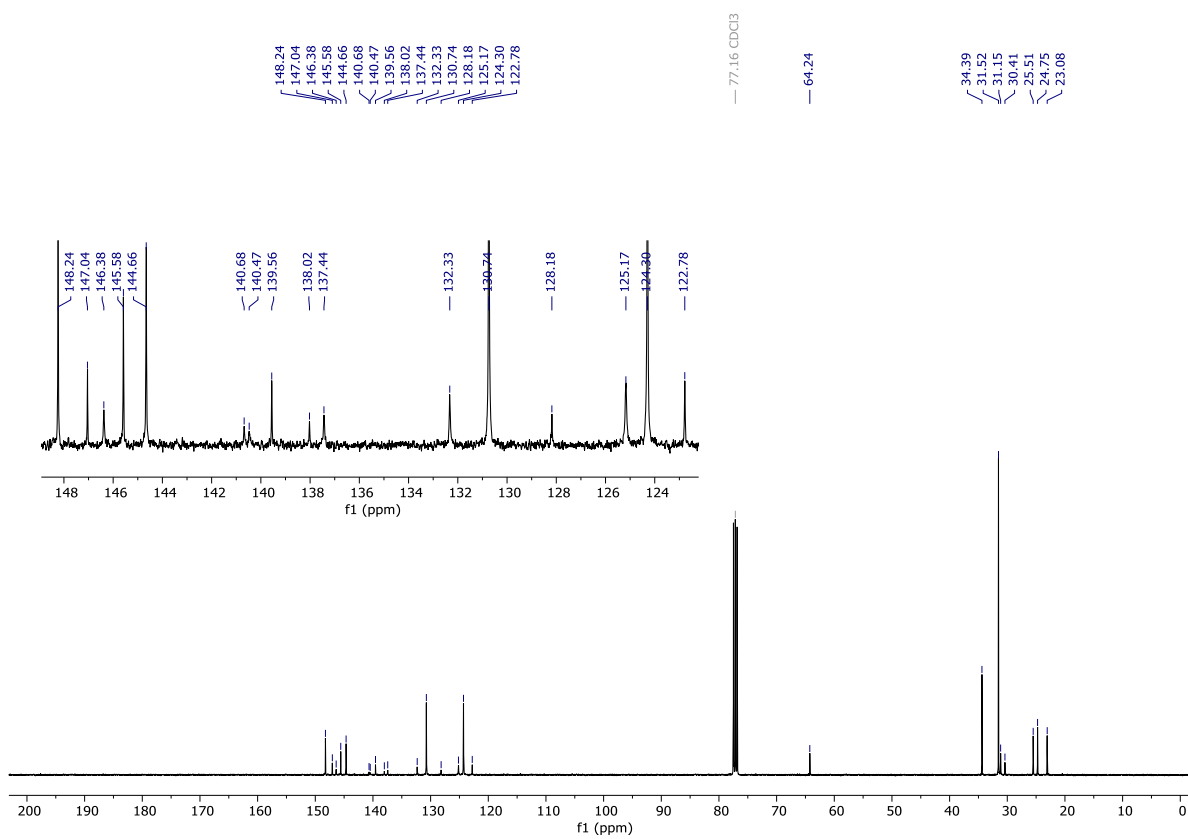

<sup>1</sup>H NMR (500 MHz, CDCl<sub>3</sub>) of Bpin\_C4\_N

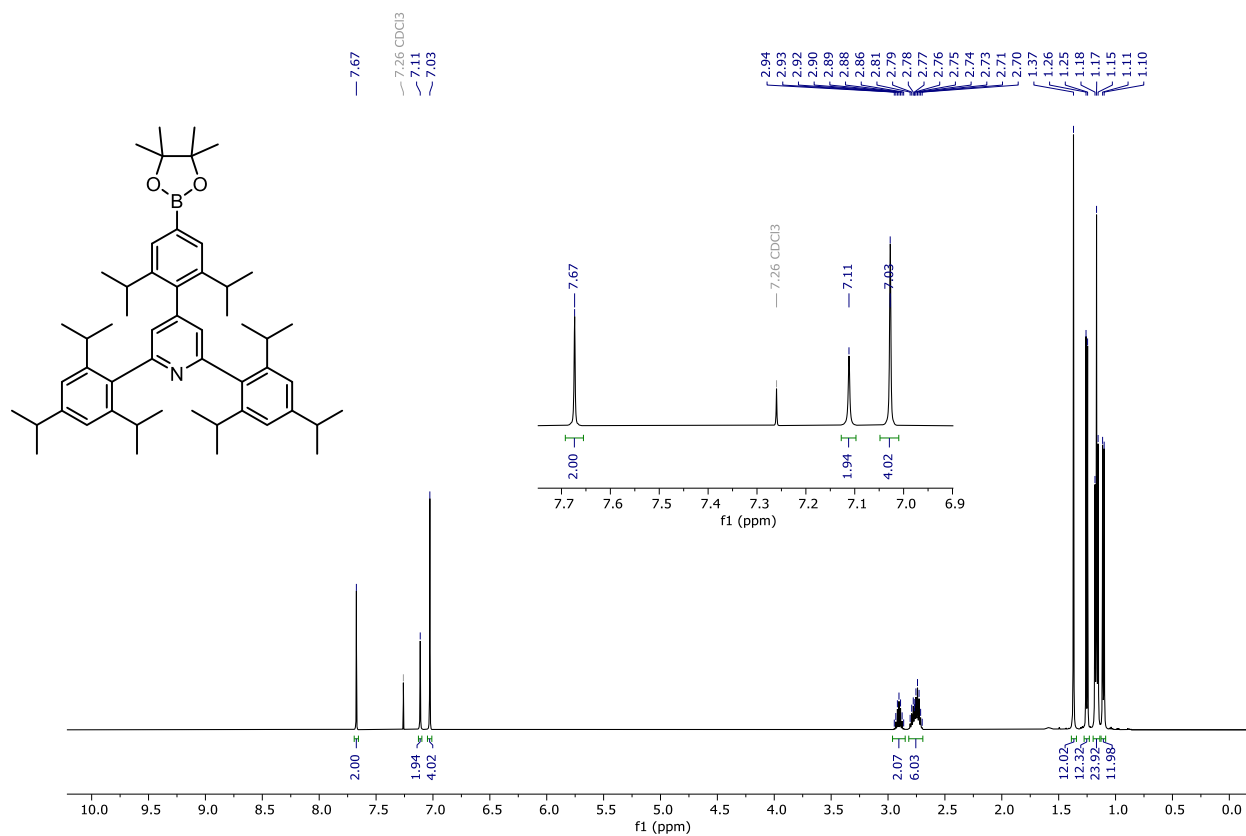

<sup>13</sup>C NMR (126 MHz, CDCl<sub>3</sub>) of Bpin\_C4\_N

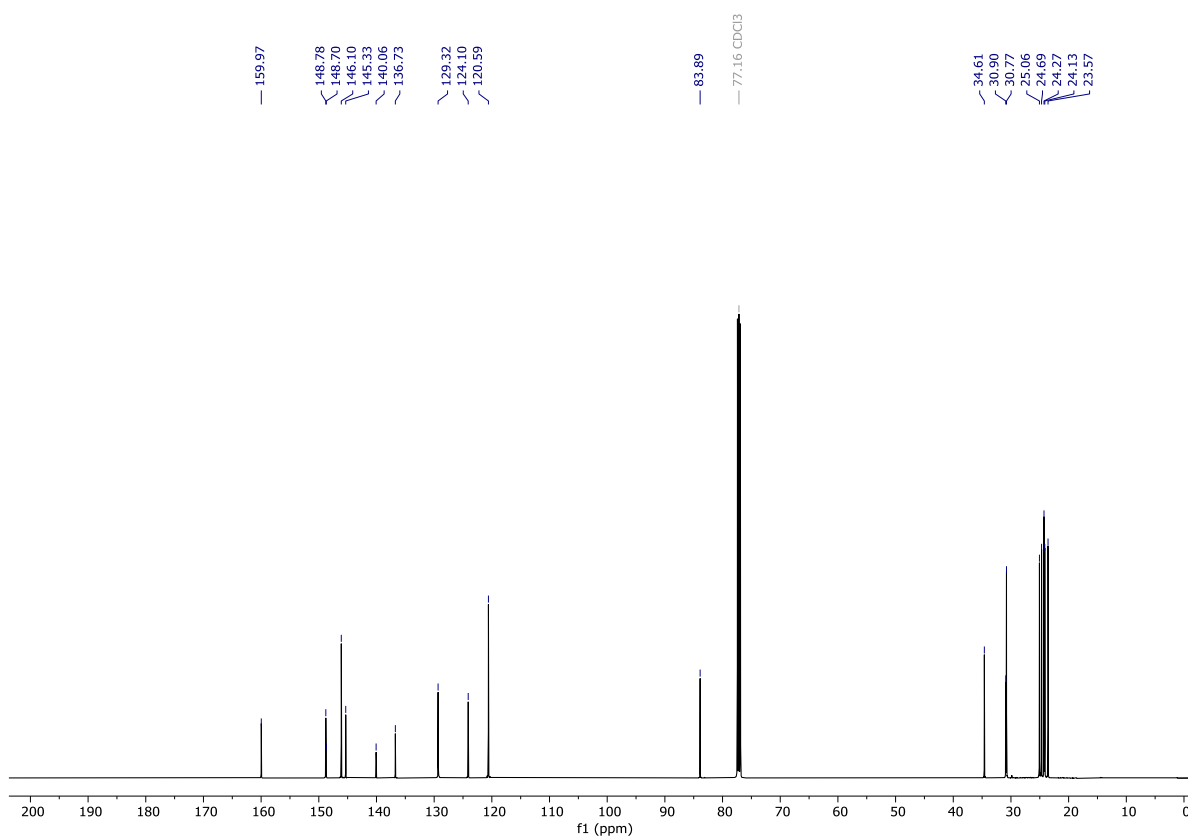

<sup>1</sup>H NMR (500 MHz, CDCl<sub>3</sub>) of **C8\_N**

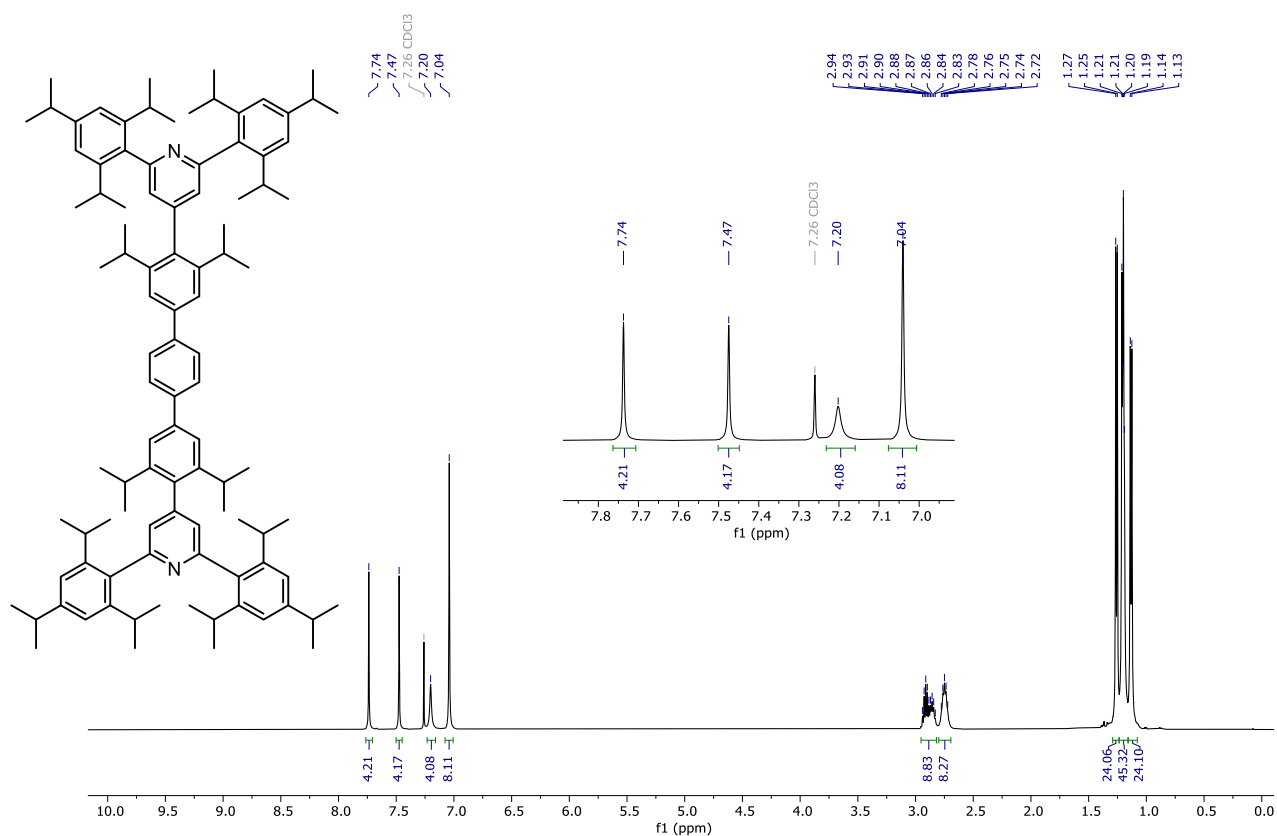

<sup>13</sup>C NMR (126 MHz, CDCl<sub>3</sub>) of **C8\_N**

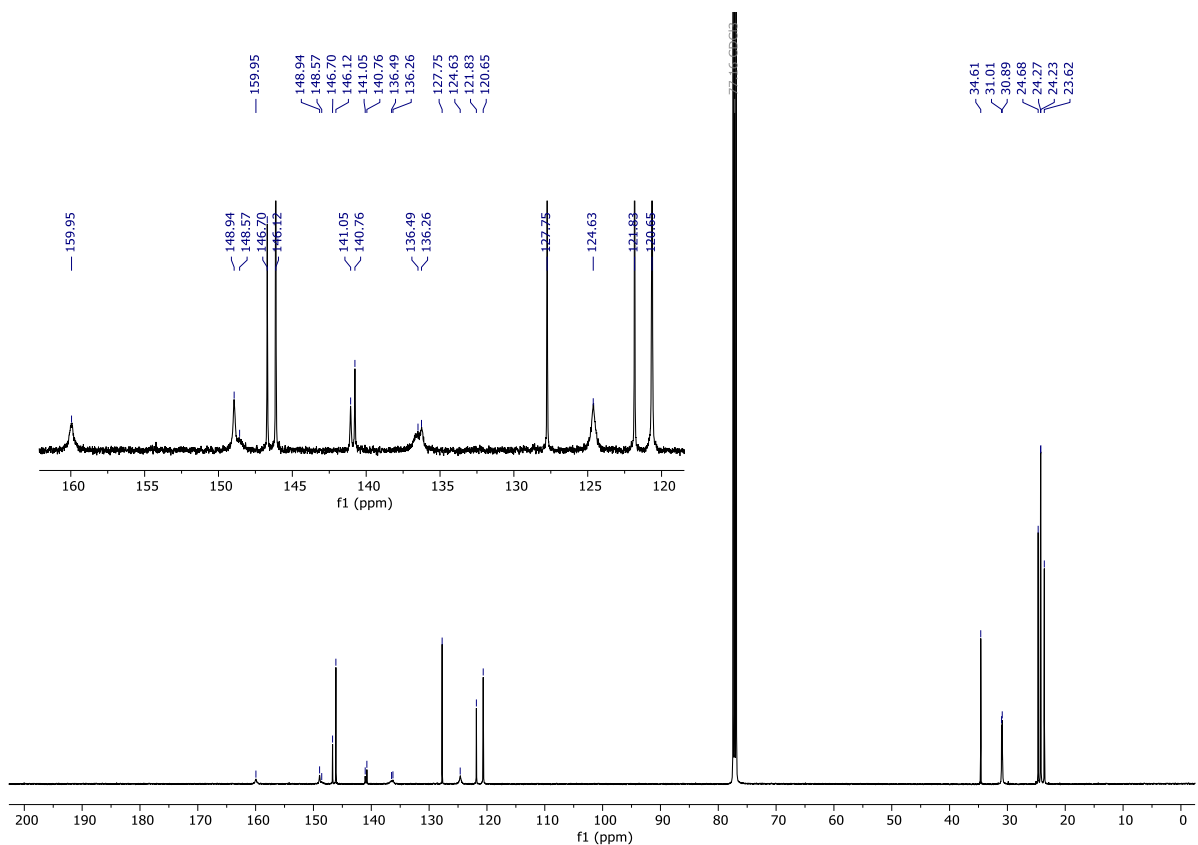

$^1\text{H}$  NMR (500 MHz,  $\text{CDCl}_3$ ) of  $\text{C8}^{2+}(\text{BF}_4^-)_2$

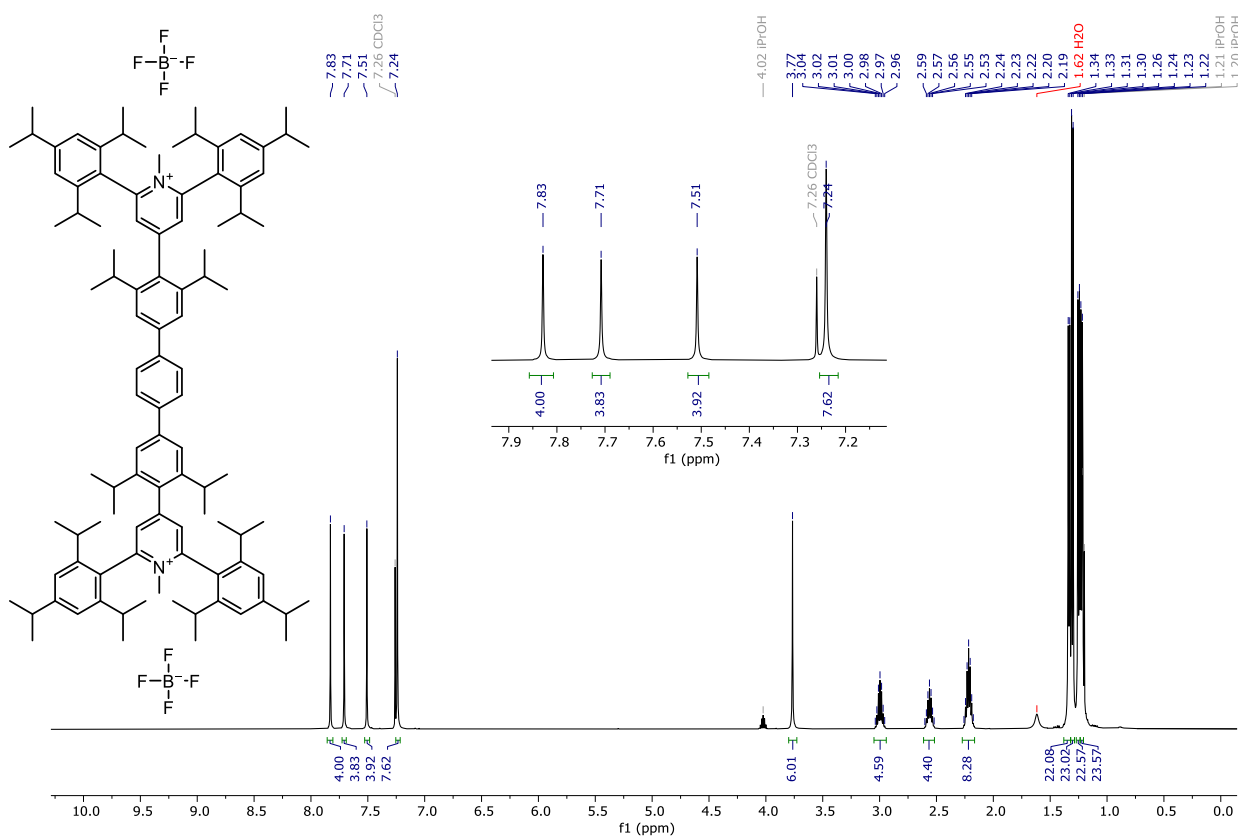

$^{13}\text{C}$  NMR (126 MHz,  $\text{CDCl}_3$ ) of  $\text{C8}^{2+}(\text{BF}_4^-)_2$

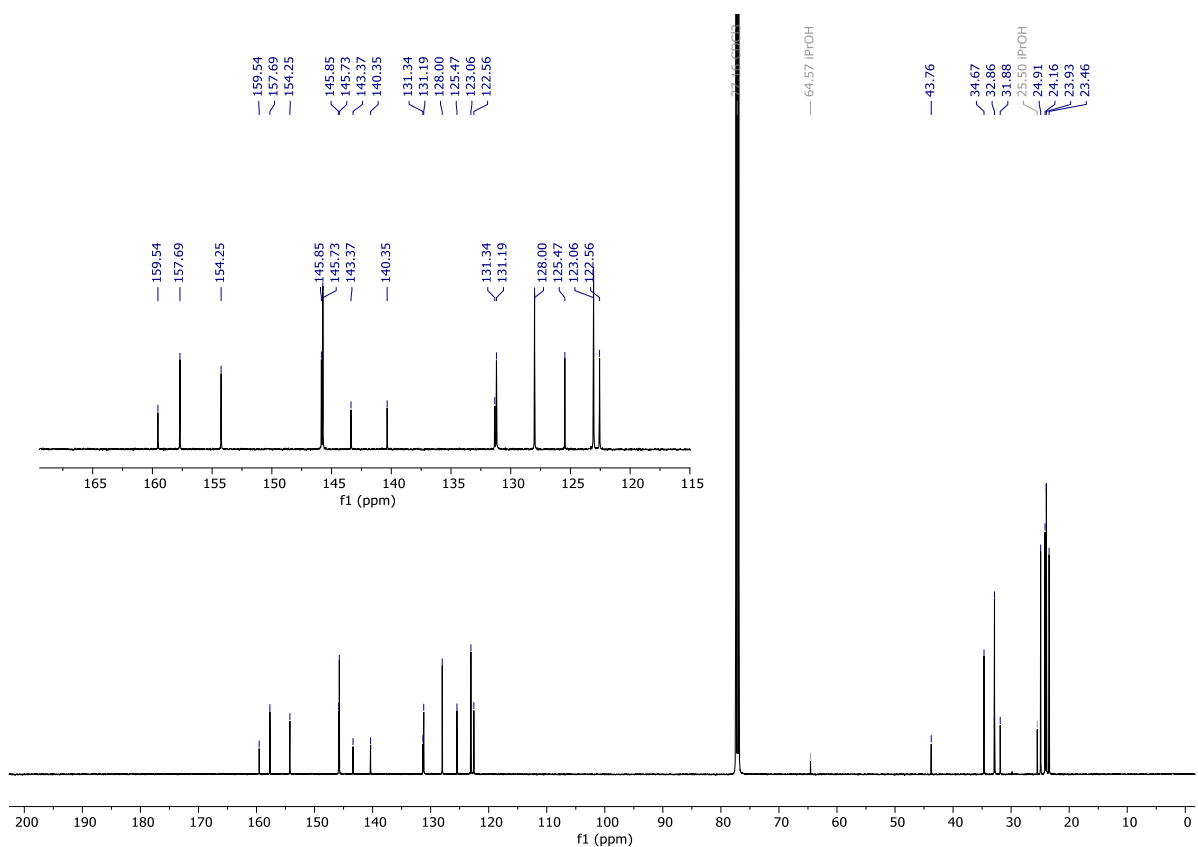

$^{19}\text{F}$  NMR (471 MHz,  $\text{CDCl}_3$ ) of  $\text{C8}^{2+}(\text{BF}_4^-)_2$

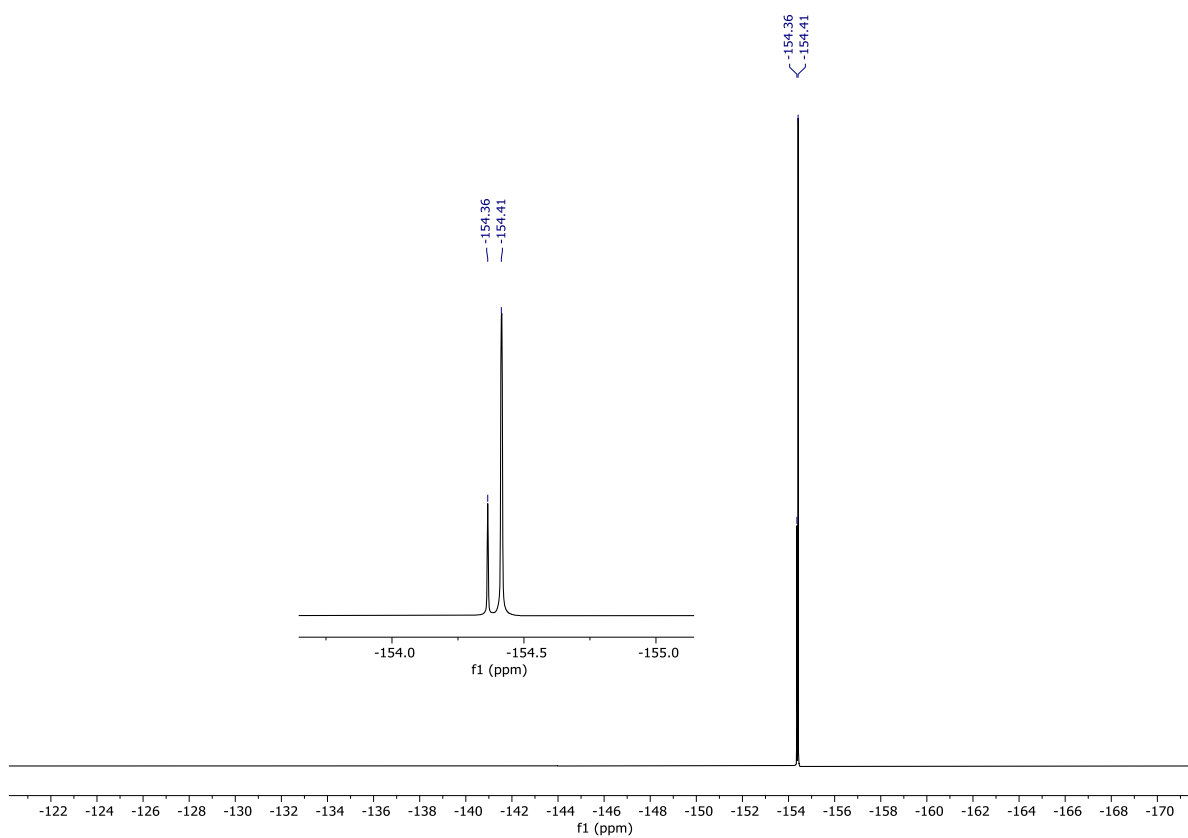

<sup>1</sup>H NMR (400 MHz, CDCl<sub>3</sub>) of C<sub>9</sub>\_N

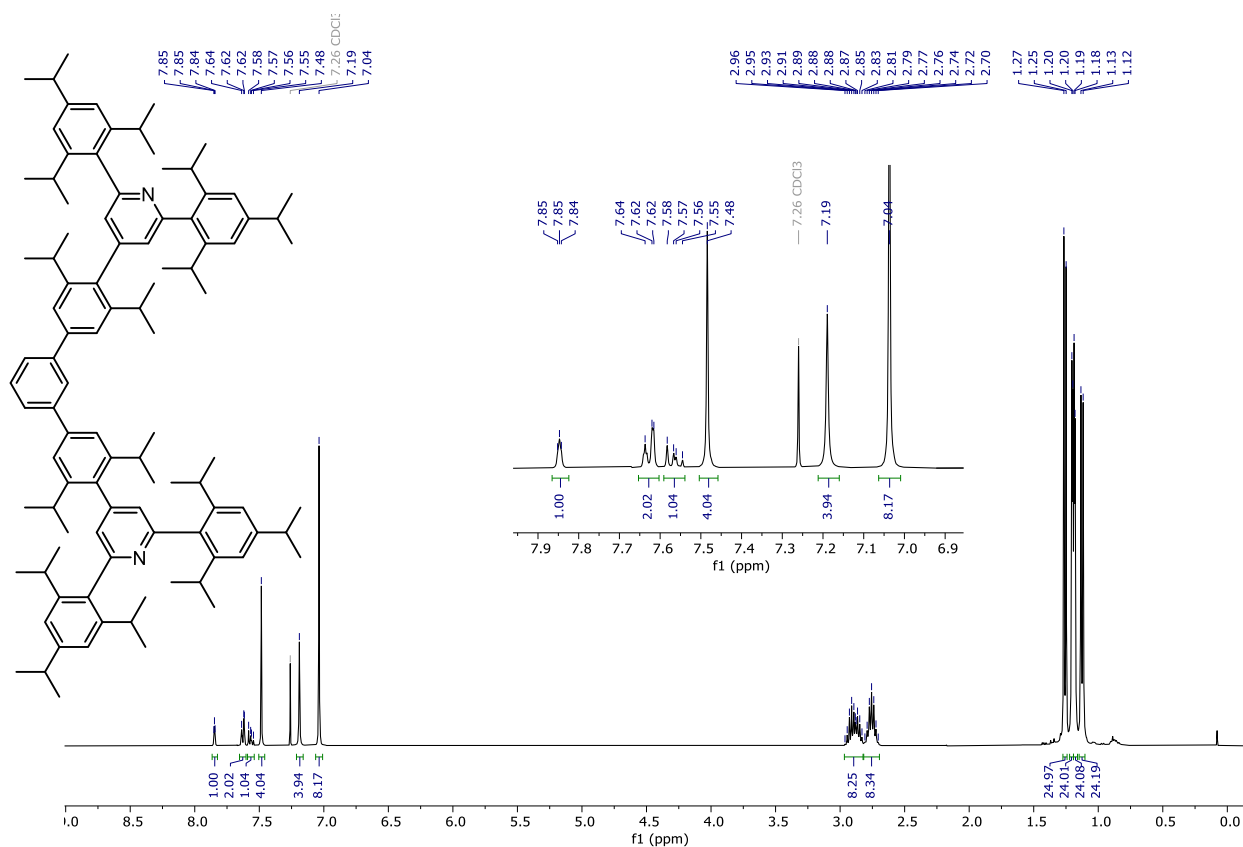

<sup>13</sup>C NMR (101 MHz, CDCl<sub>3</sub>) of C<sub>9</sub>\_N

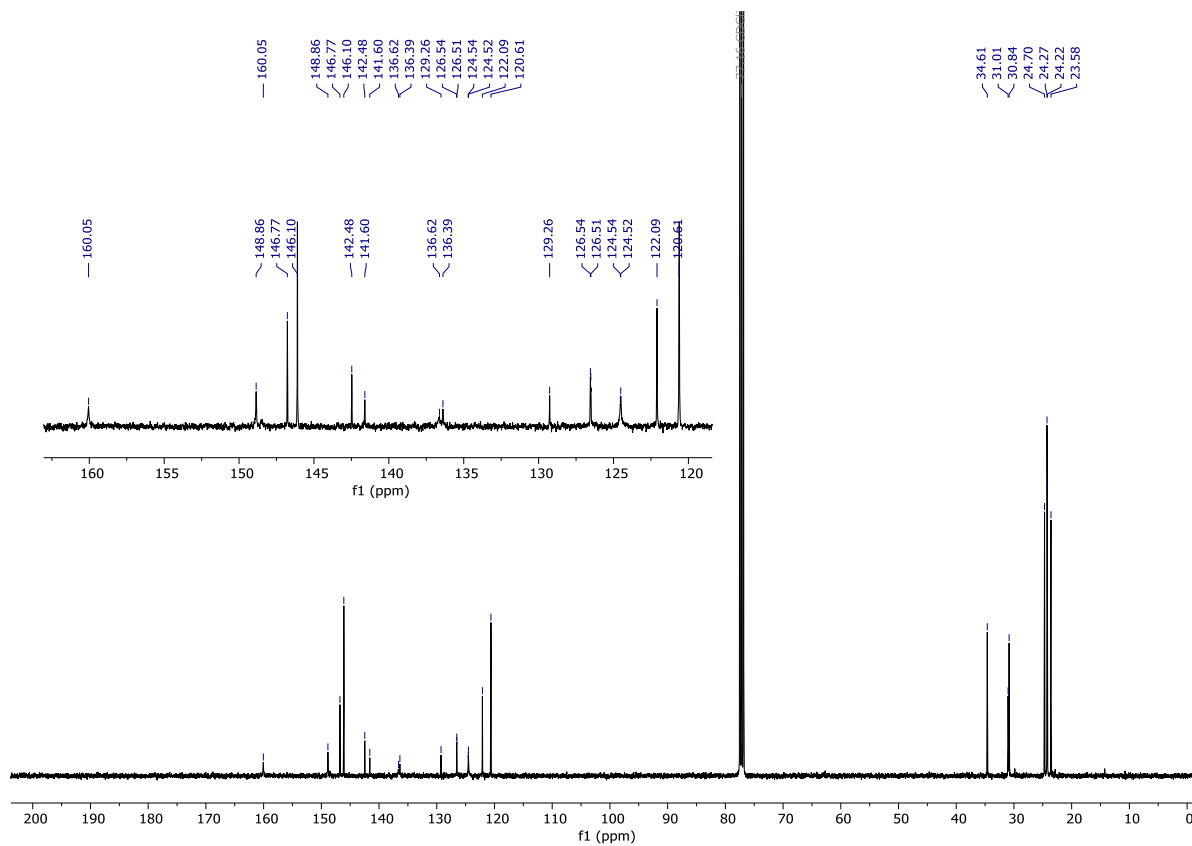

$^1\text{H}$  NMR (400 MHz,  $\text{CDCl}_3$ ) of  $\text{C9}^{2+}(\text{BF}_4^-)_2$

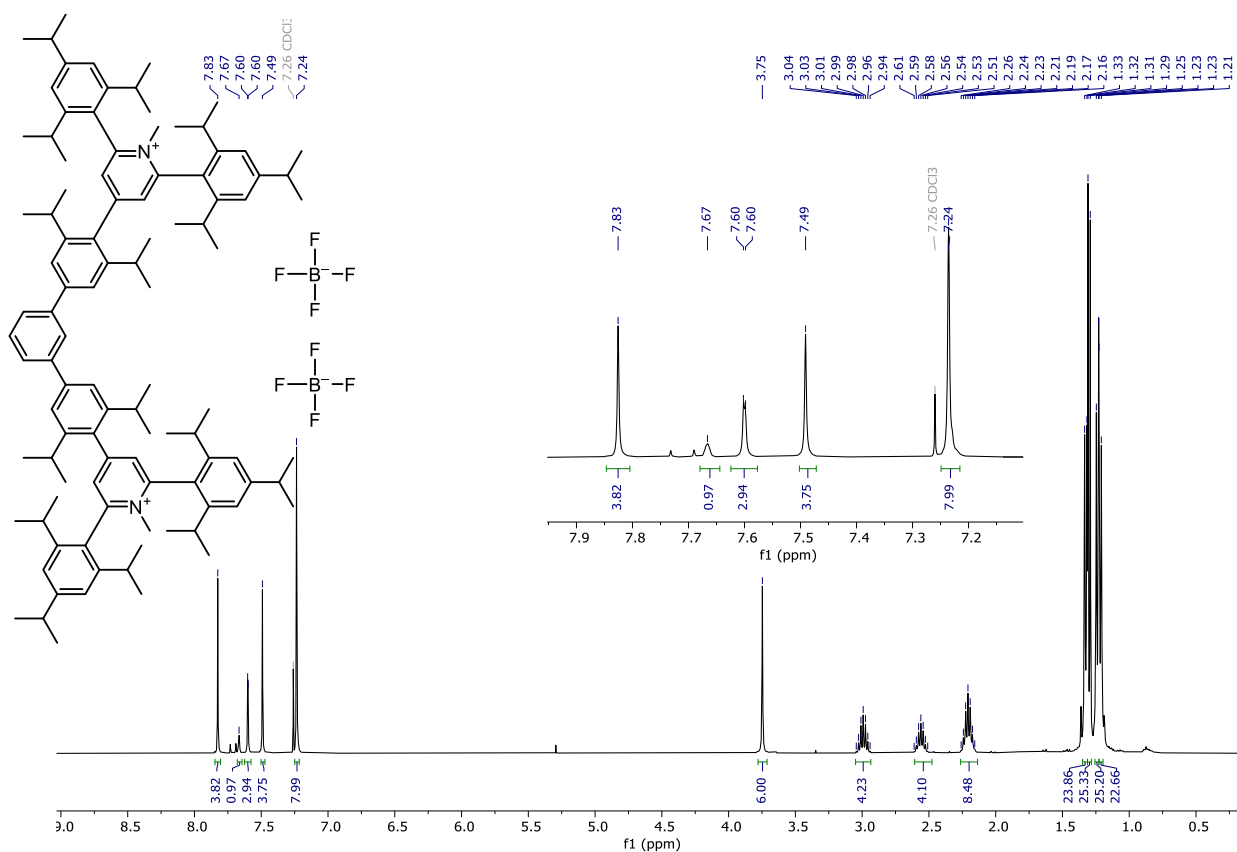

$^{13}\text{C}$  NMR (101 MHz,  $\text{CDCl}_3$ ) of  $\text{C9}^{2+}(\text{BF}_4^-)_2$

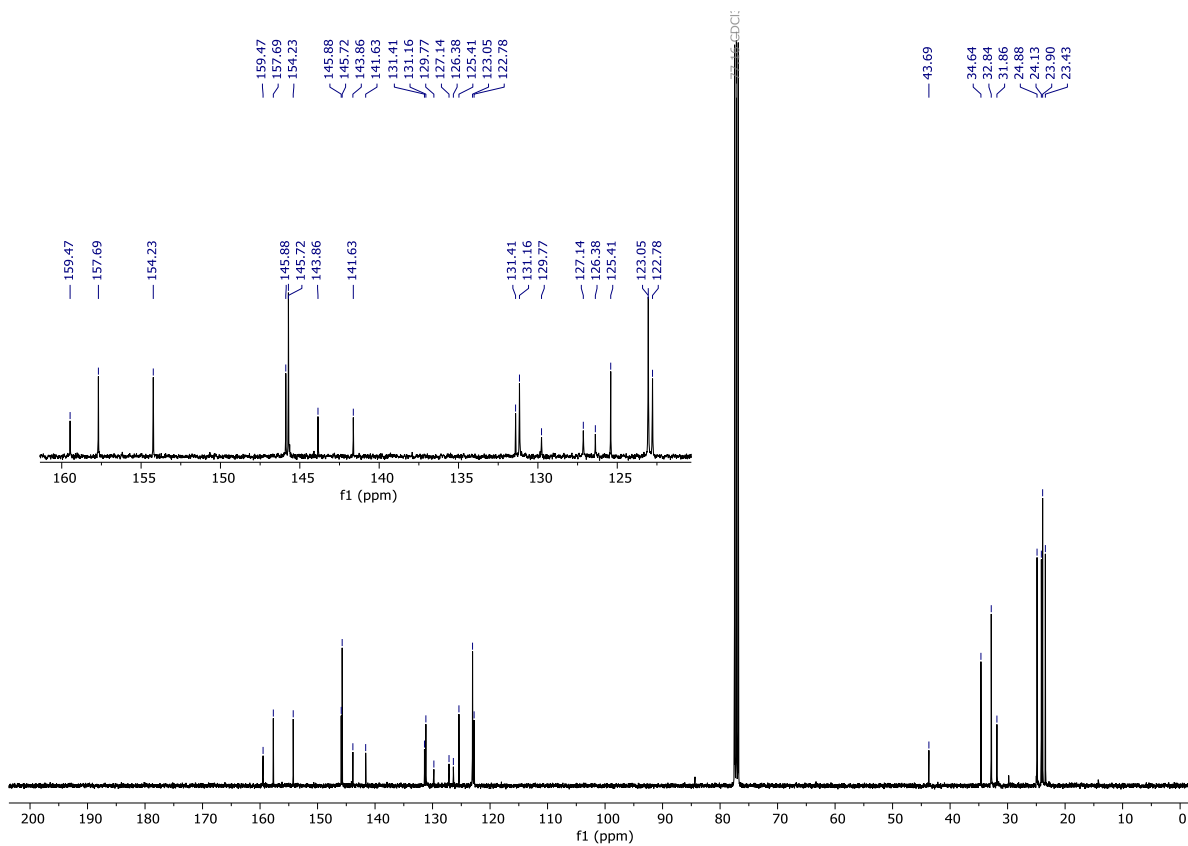

$^{19}\text{F}$  NMR (376 MHz,  $\text{CDCl}_3$ ) of  $\text{C9}^{2+}(\text{BF}_4^-)_2$

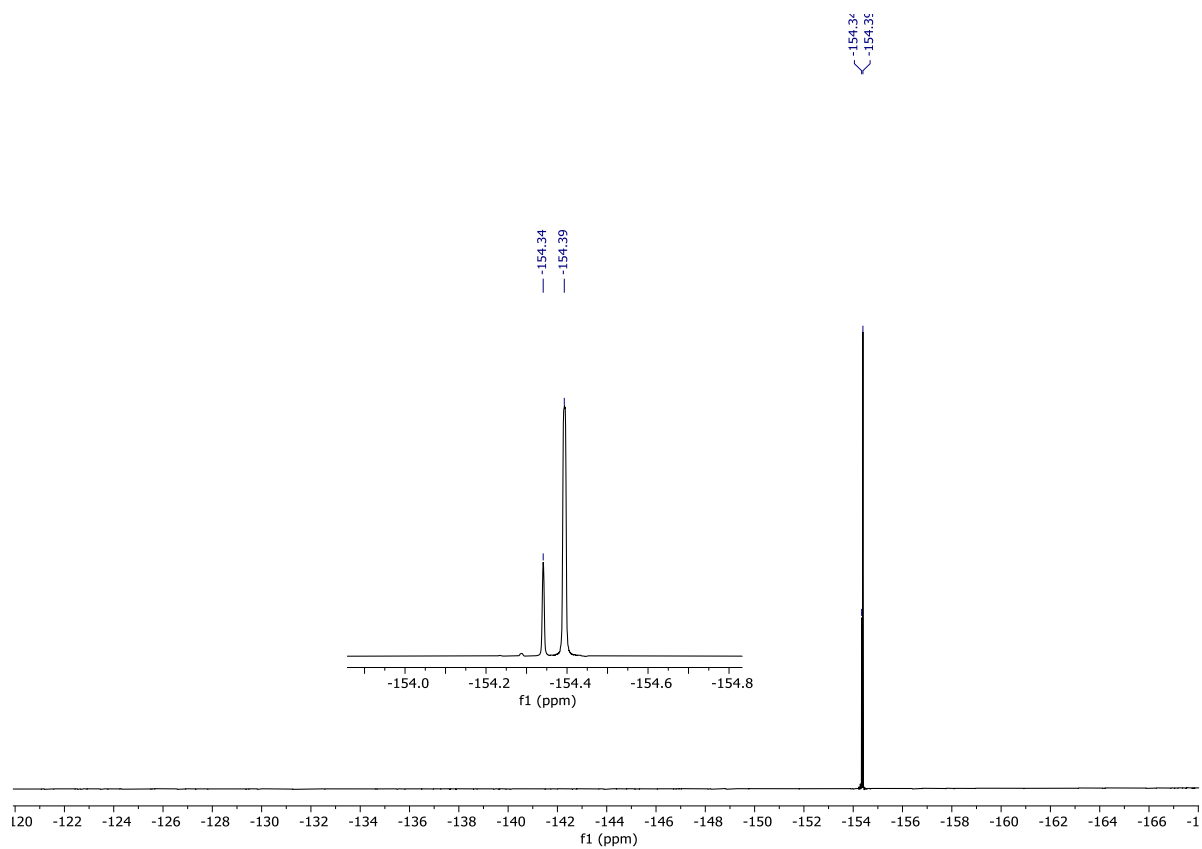



<sup>1</sup>H NMR (500 MHz, CDCl<sub>3</sub>) of **C10\_N**

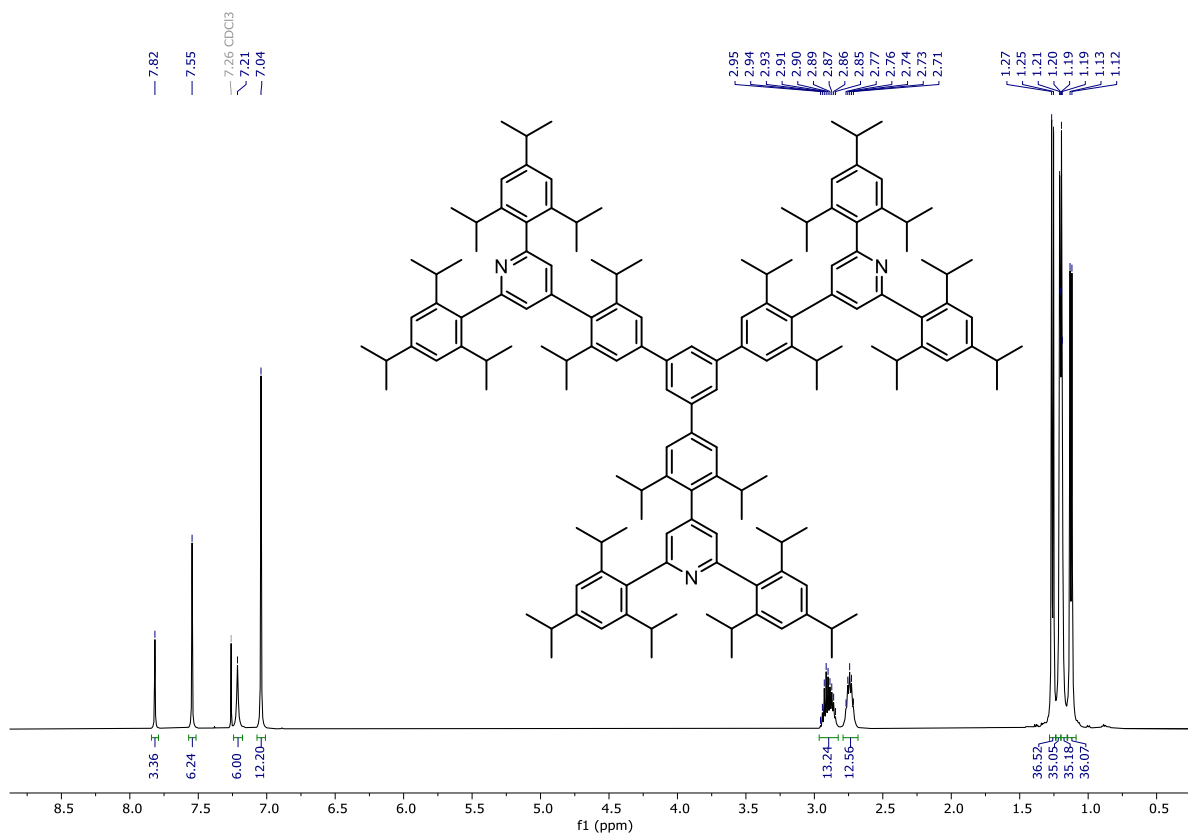

<sup>13</sup>C NMR (126 MHz, CDCl<sub>3</sub>) of **C10\_N**

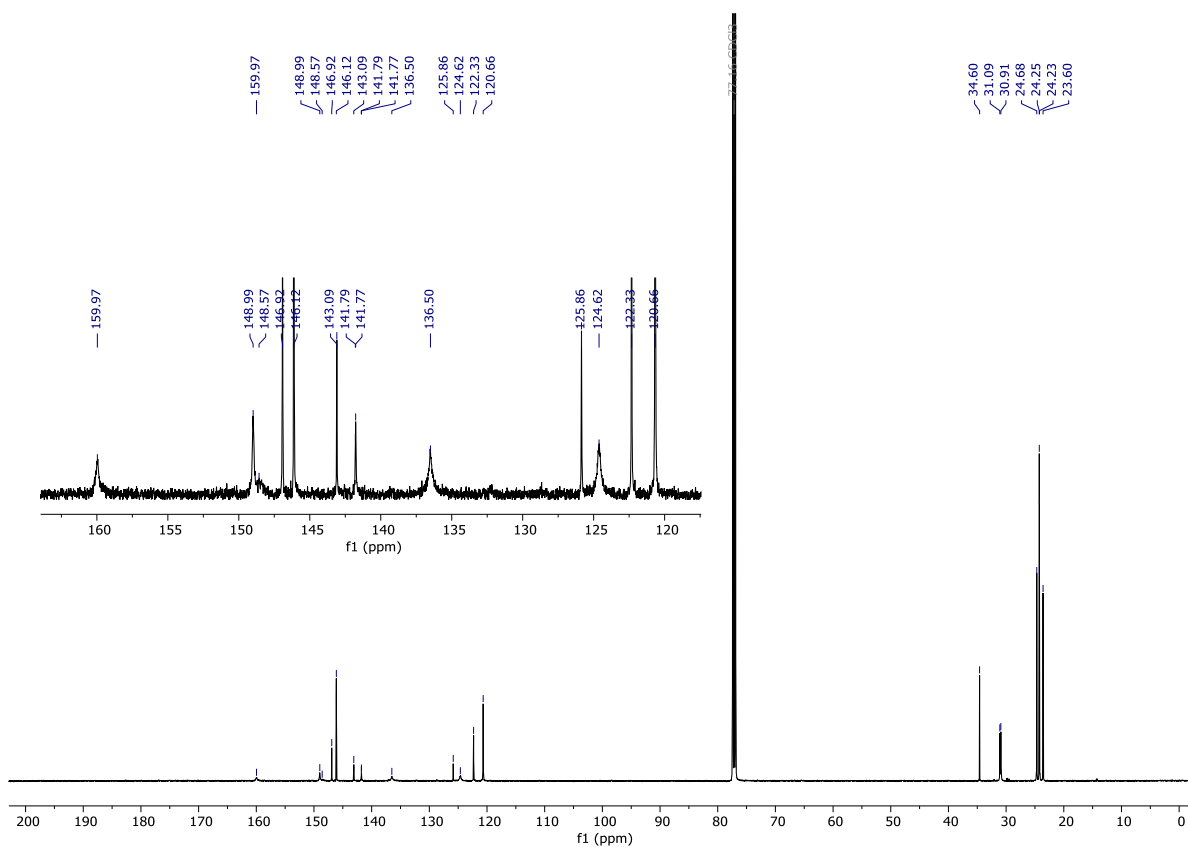

$^1\text{H}$  NMR (500 MHz,  $\text{CDCl}_3$ ) of  $\text{C10}^{3+}(\text{BF}_4^-)_3$

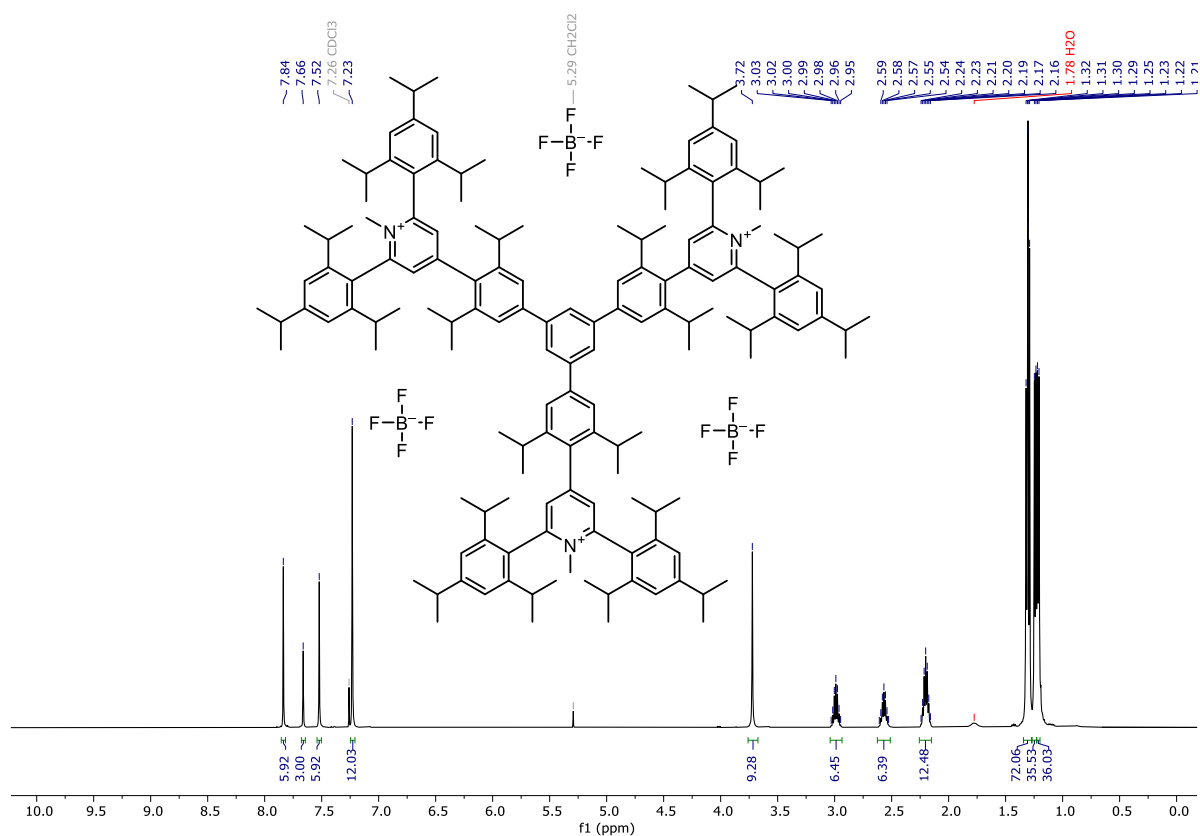

$^{13}\text{C}$  NMR (126 MHz,  $\text{CDCl}_3$ ) of  $\text{C10}^{3+}(\text{BF}_4^-)_3$

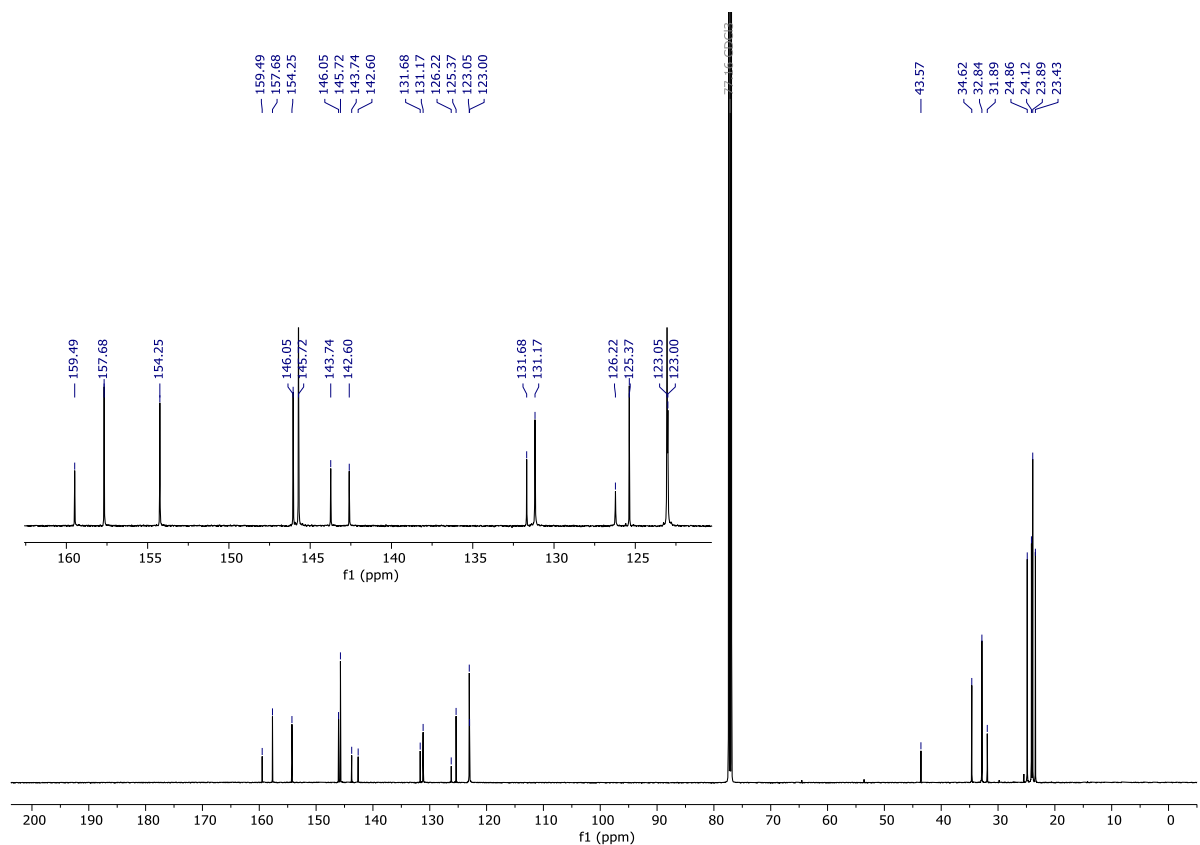

$^{19}\text{F}$  NMR (471 MHz,  $\text{CDCl}_3$ ) of  $\text{C10}^{3+}(\text{BF}_4^-)_3$

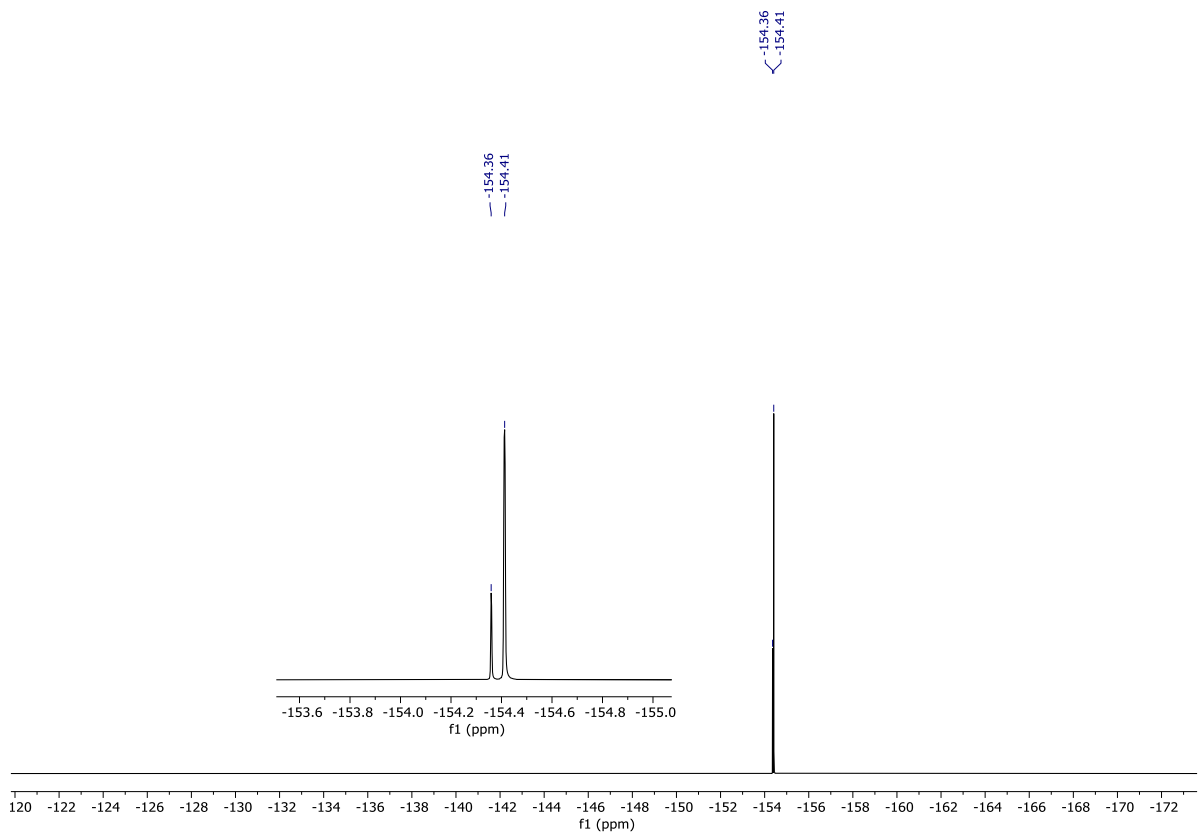

$^1\text{H}$  NMR (400 MHz,  $\text{CDCl}_3$ ) of **A4\_SO<sub>3</sub>Et**

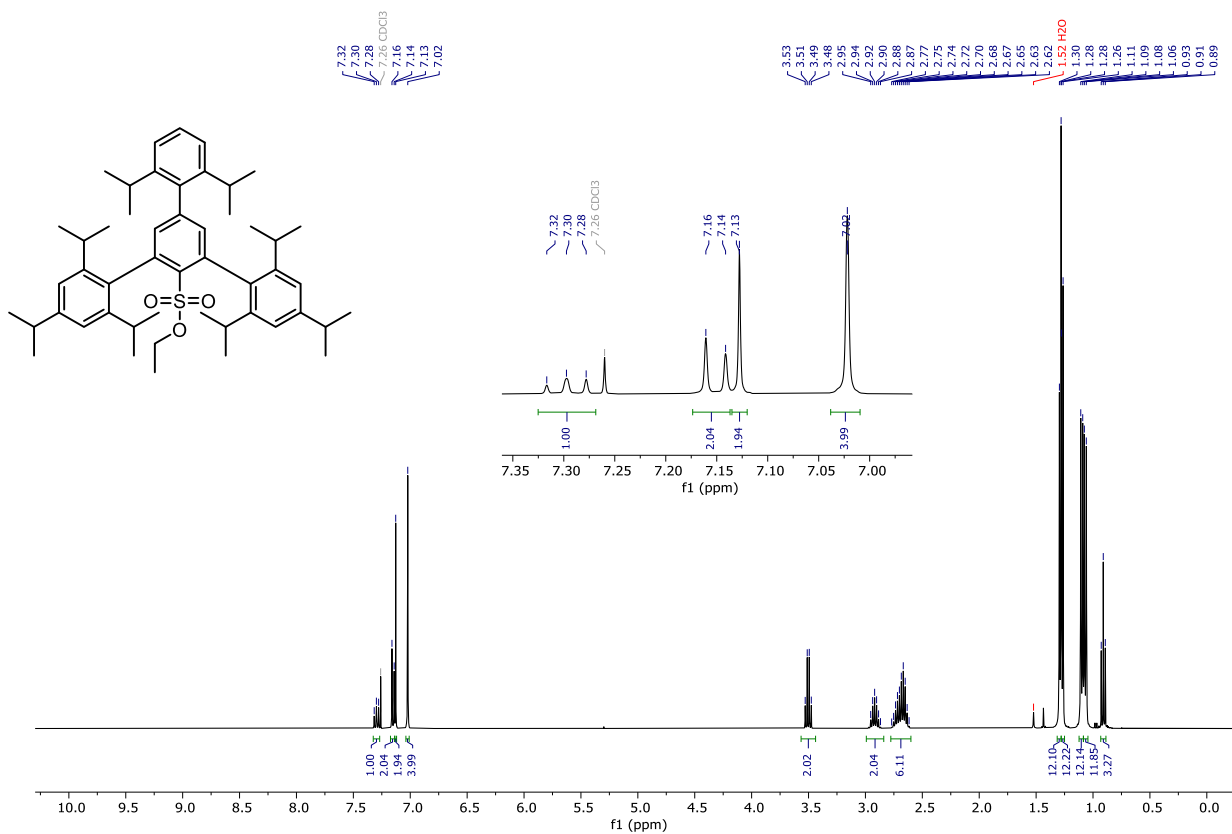

$^{13}\text{C}$  NMR (101 MHz,  $\text{CDCl}_3$ ) of **A4\_SO<sub>3</sub>Et**

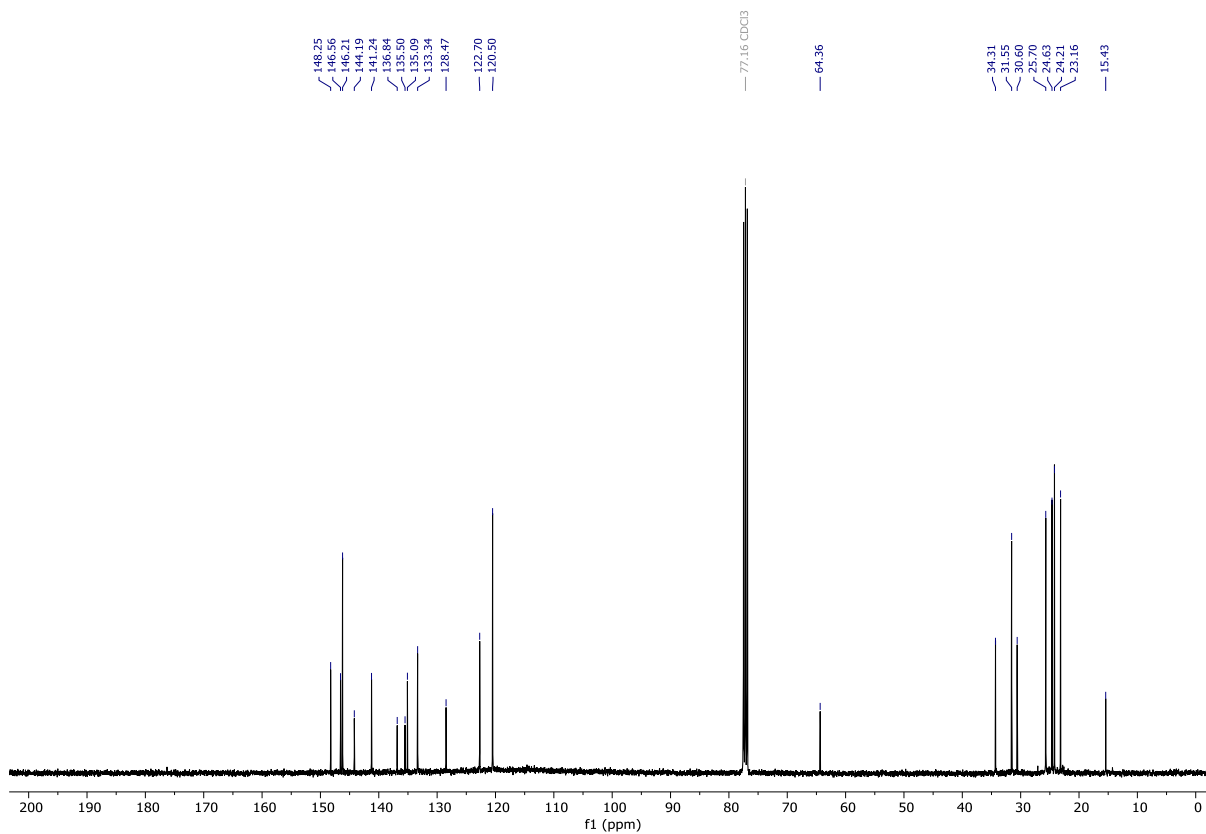

<sup>1</sup>H NMR (500 MHz, CDCl<sub>3</sub>) of Bpin\_A4\_SO<sub>3</sub>Et

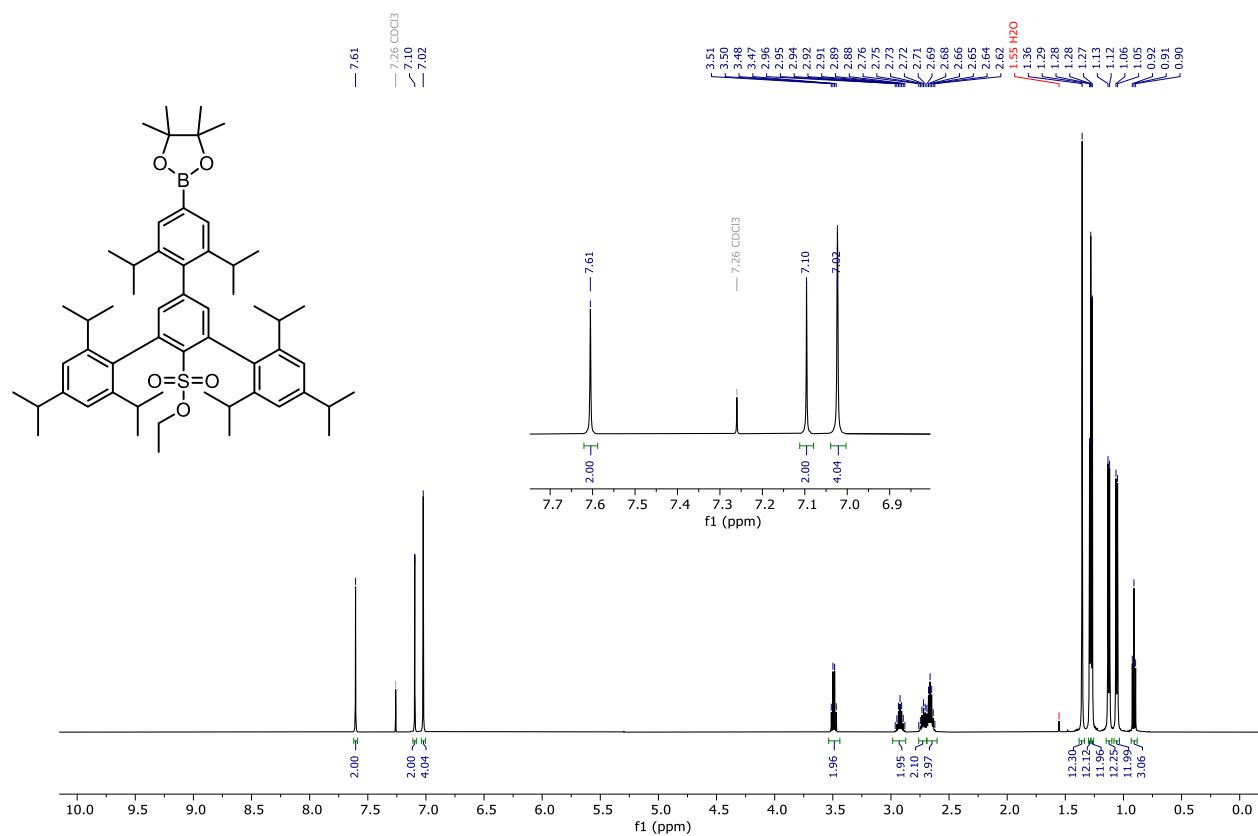

<sup>13</sup>C NMR (126 MHz, CDCl<sub>3</sub>) of Bpin\_A4\_SO<sub>3</sub>Et

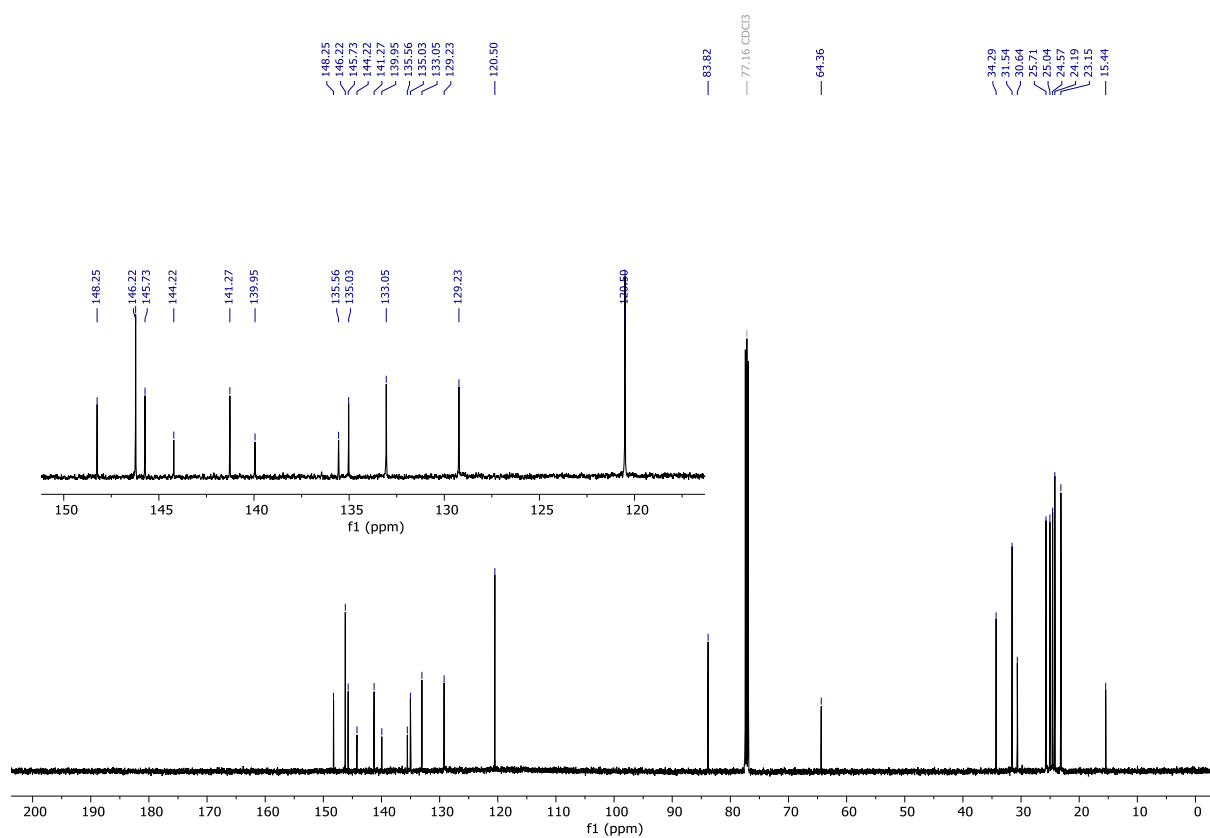

<sup>1</sup>H NMR (500 MHz, C<sub>6</sub>D<sub>6</sub>) of A8\_SO<sub>3</sub>Et

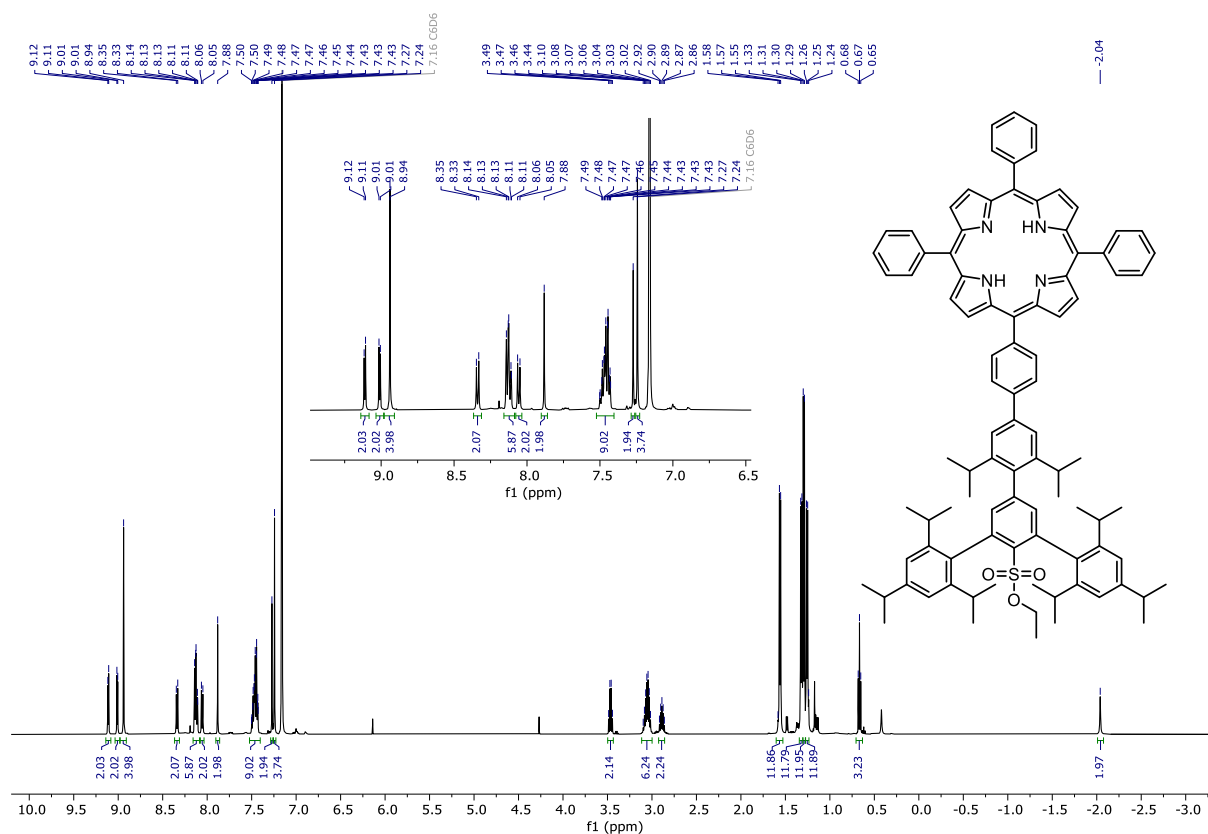

<sup>13</sup>C NMR (126 MHz, C<sub>6</sub>D<sub>6</sub>) of A8\_SO<sub>3</sub>Et

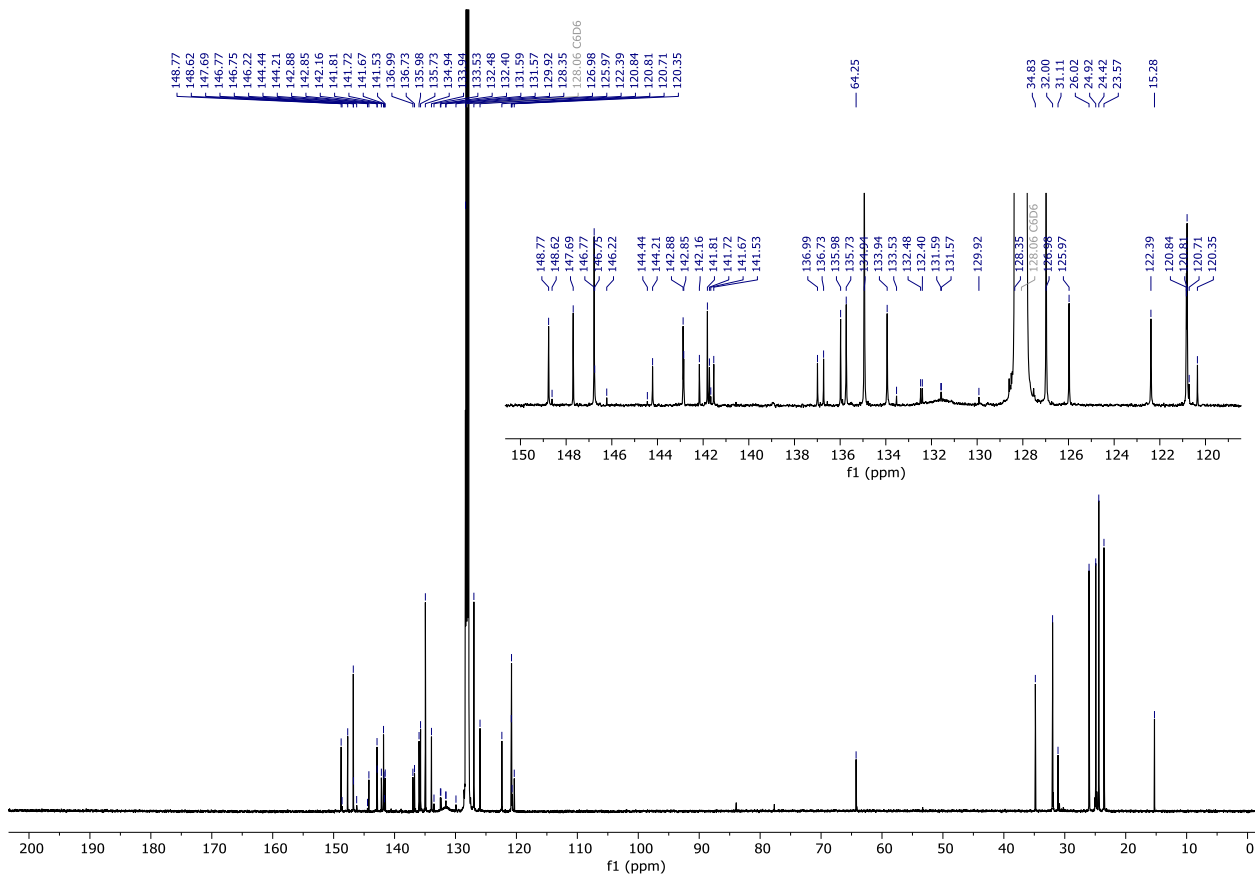

<sup>1</sup>H NMR (500 MHz, CDCl<sub>3</sub>) of Na<sup>+</sup>A8<sup>-</sup>

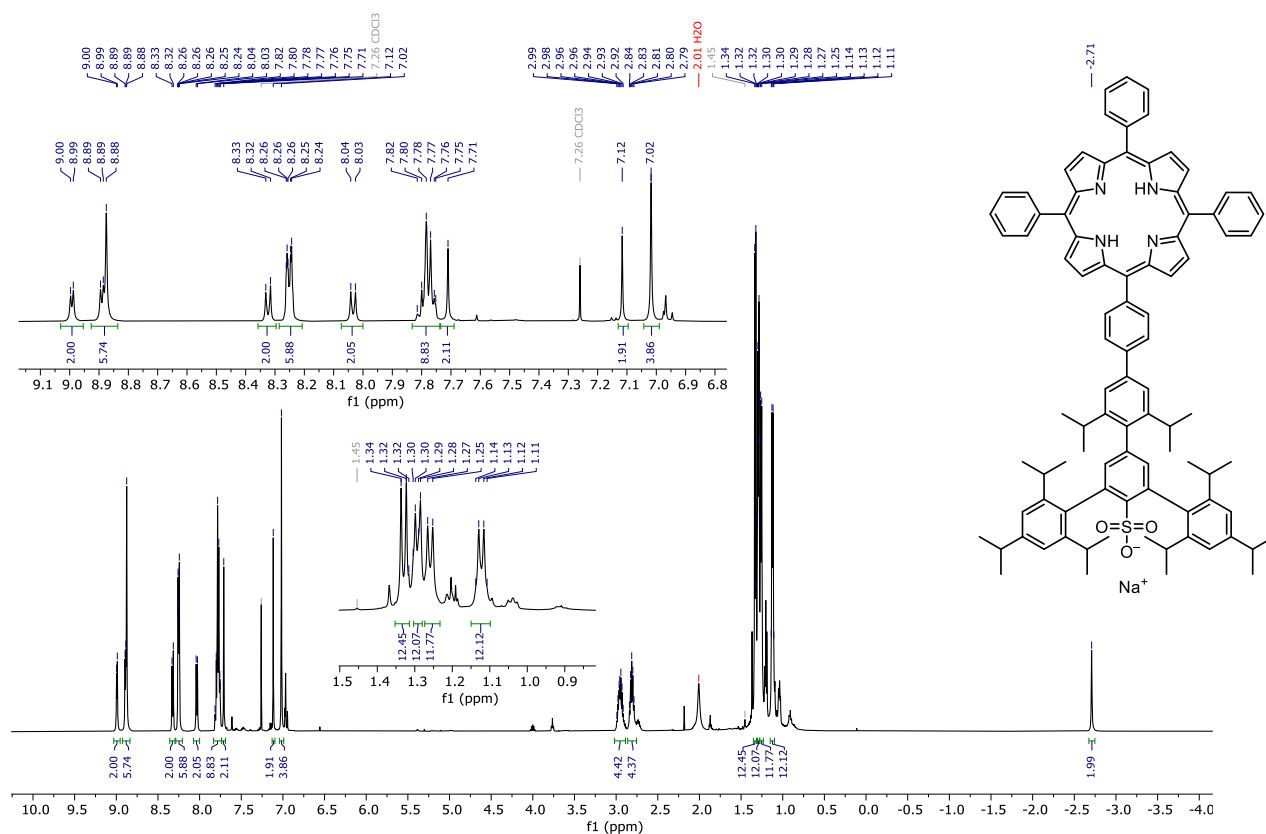

<sup>13</sup>C NMR (126 MHz, CDCl<sub>3</sub>) of Na<sup>+</sup>A8<sup>-</sup>

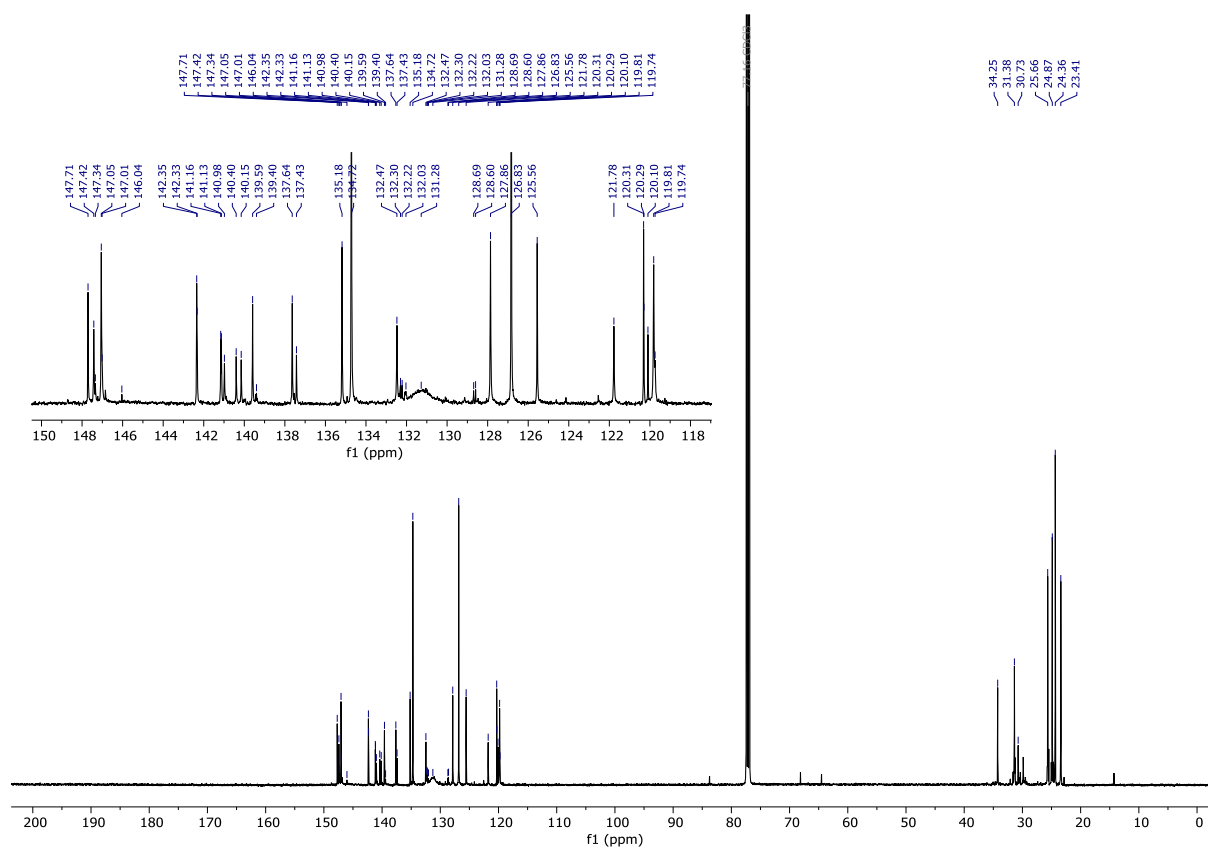

$^1\text{H}$  NMR (500 MHz,  $\text{CDCl}_3$ ) of  $\text{Na}^+\text{A9}^-$

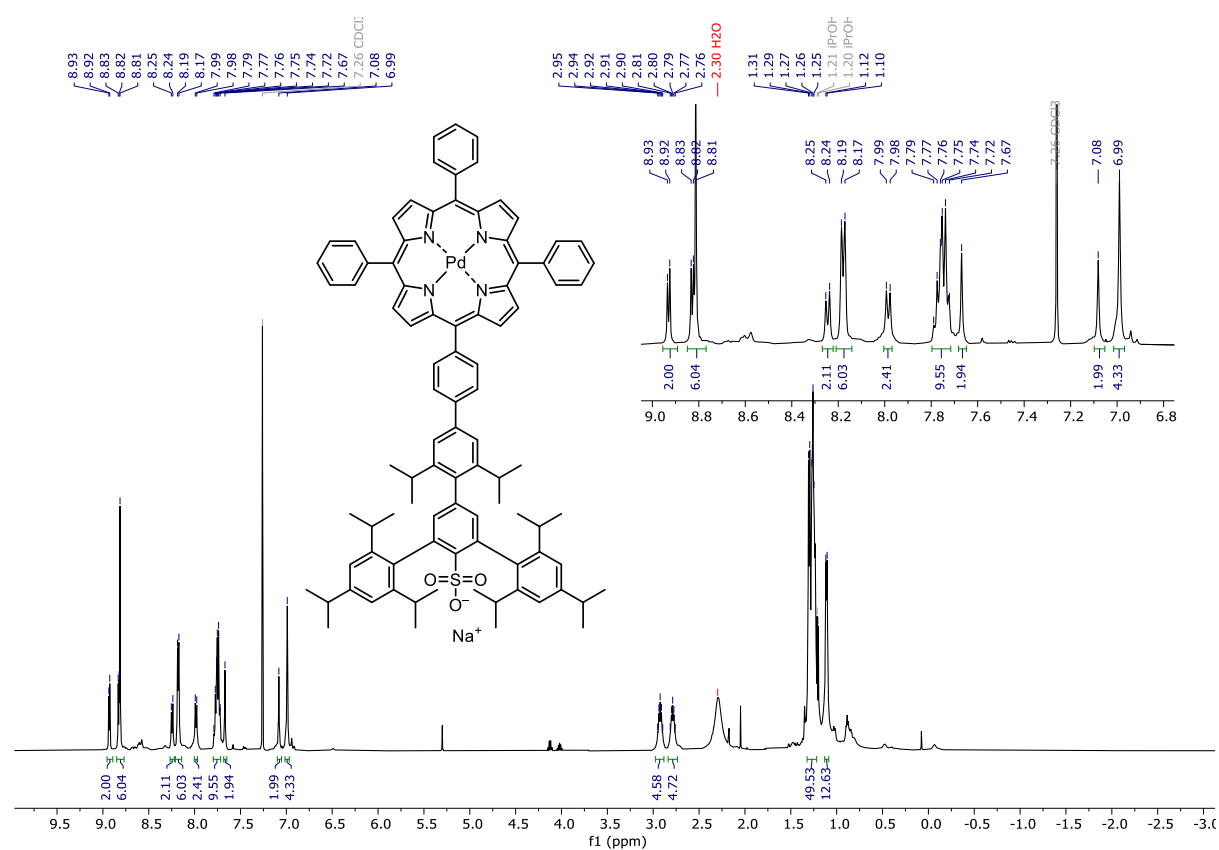

$^{13}\text{C}$  NMR (126 MHz,  $\text{CDCl}_3$ ) of  $\text{Na}^+\text{A9}^-$

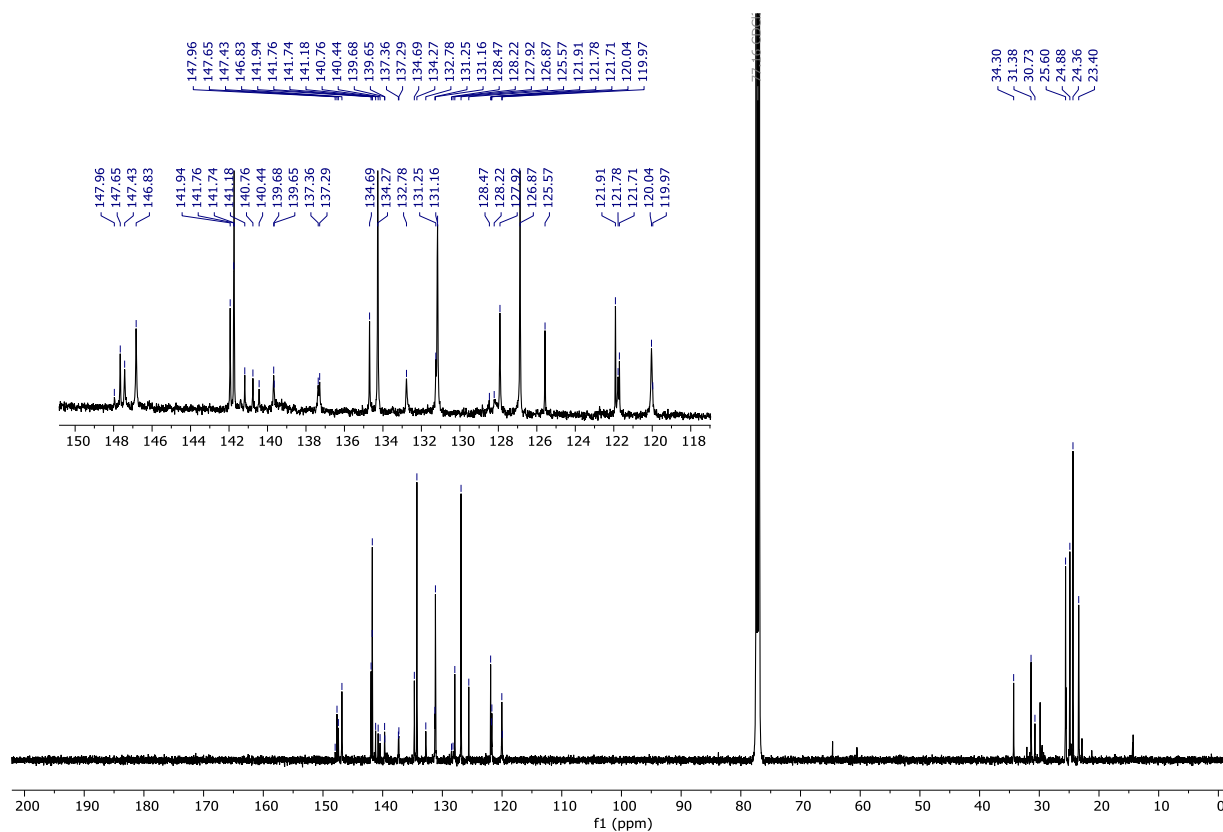



<sup>1</sup>H NMR (500 MHz, CDCl<sub>3</sub>) of A10\_SO<sub>3</sub>Et

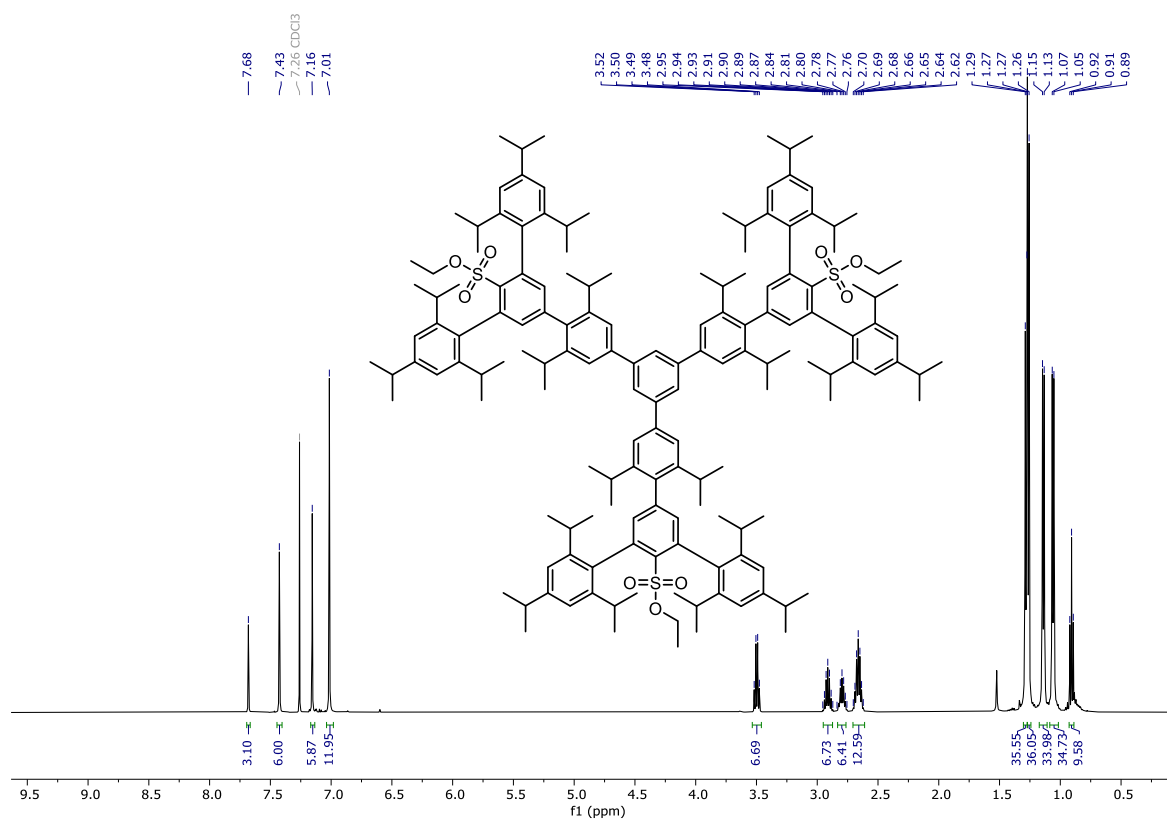

<sup>13</sup>C NMR (126 MHz, CDCl<sub>3</sub>) of A10\_SO<sub>3</sub>Et

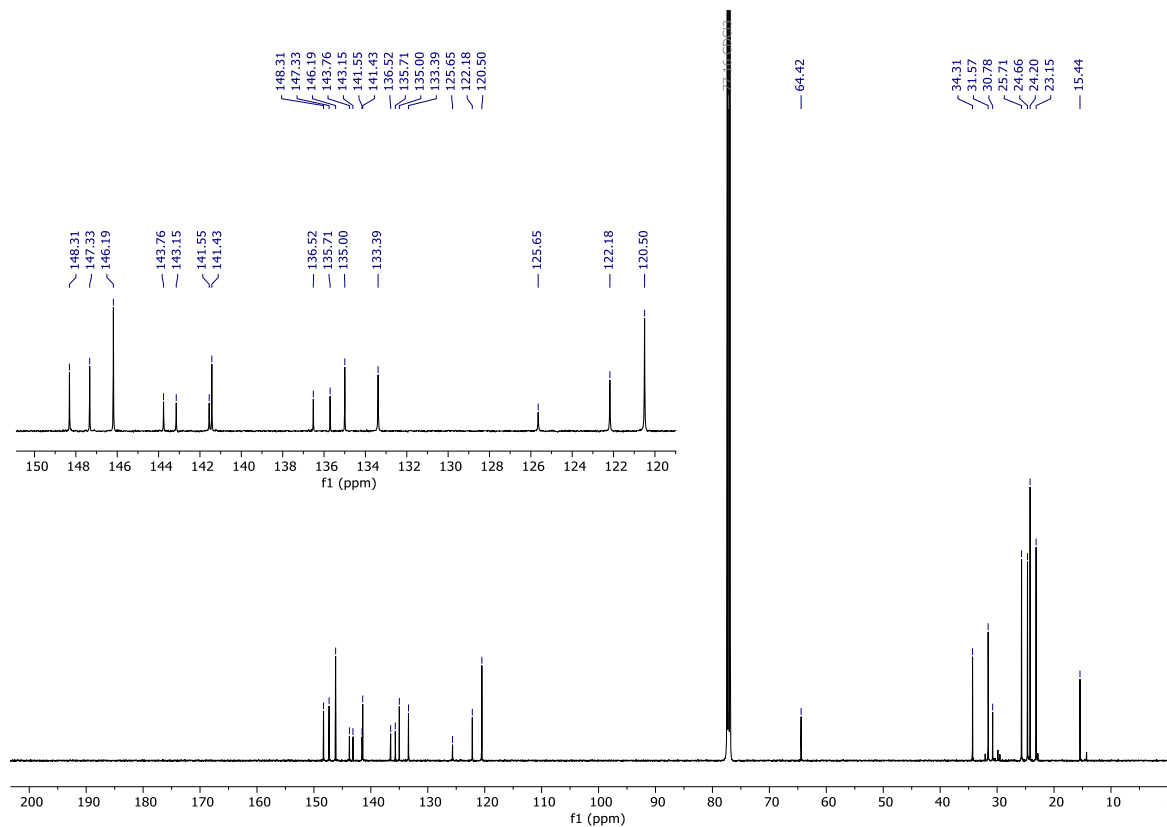

$^1\text{H}$  NMR (400 MHz,  $\text{CDCl}_3\text{-CD}_3\text{OD}$ ) of  $(\text{Na}^+)_3\text{A10}^{3-}$

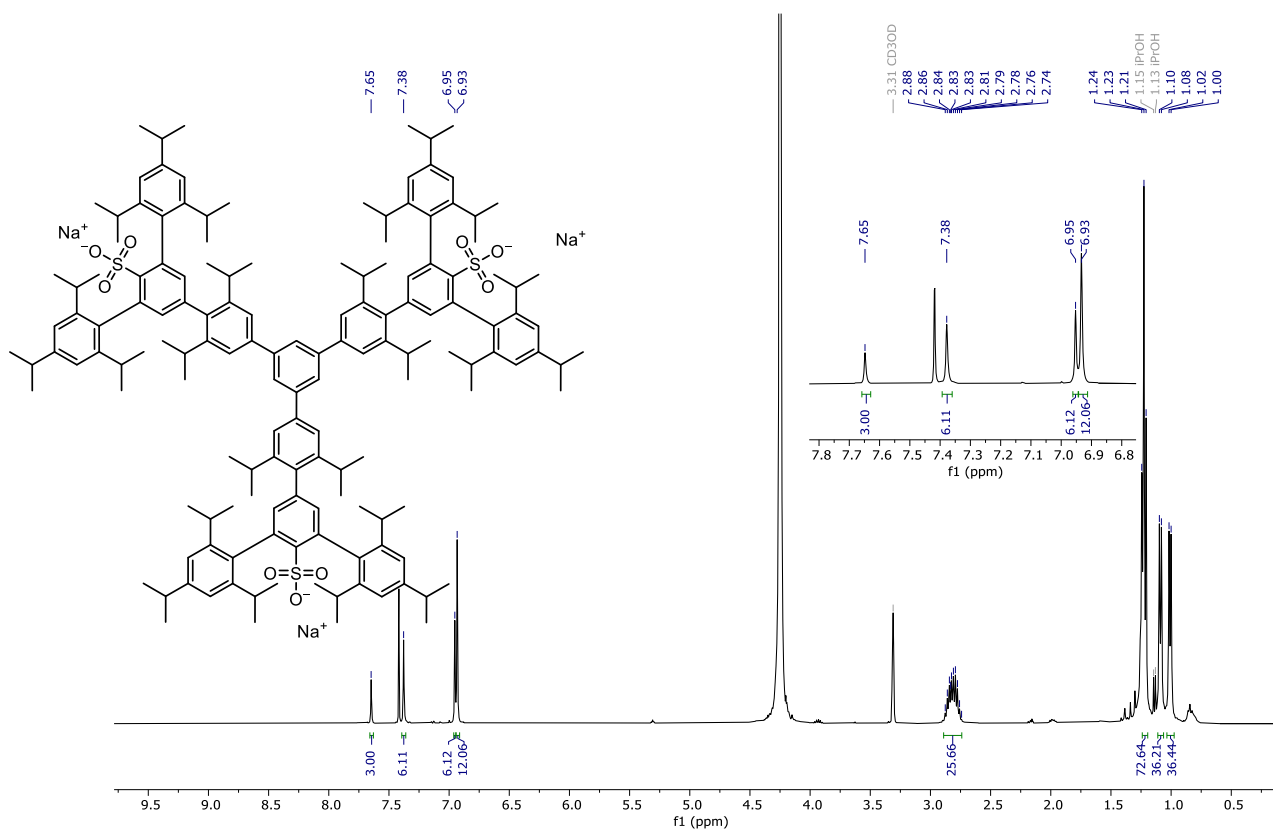

$^{13}\text{C}$  NMR (101 MHz,  $\text{CDCl}_3\text{-CD}_3\text{OD}$ ) of  $(\text{Na}^+)_3\text{A10}^{3-}$

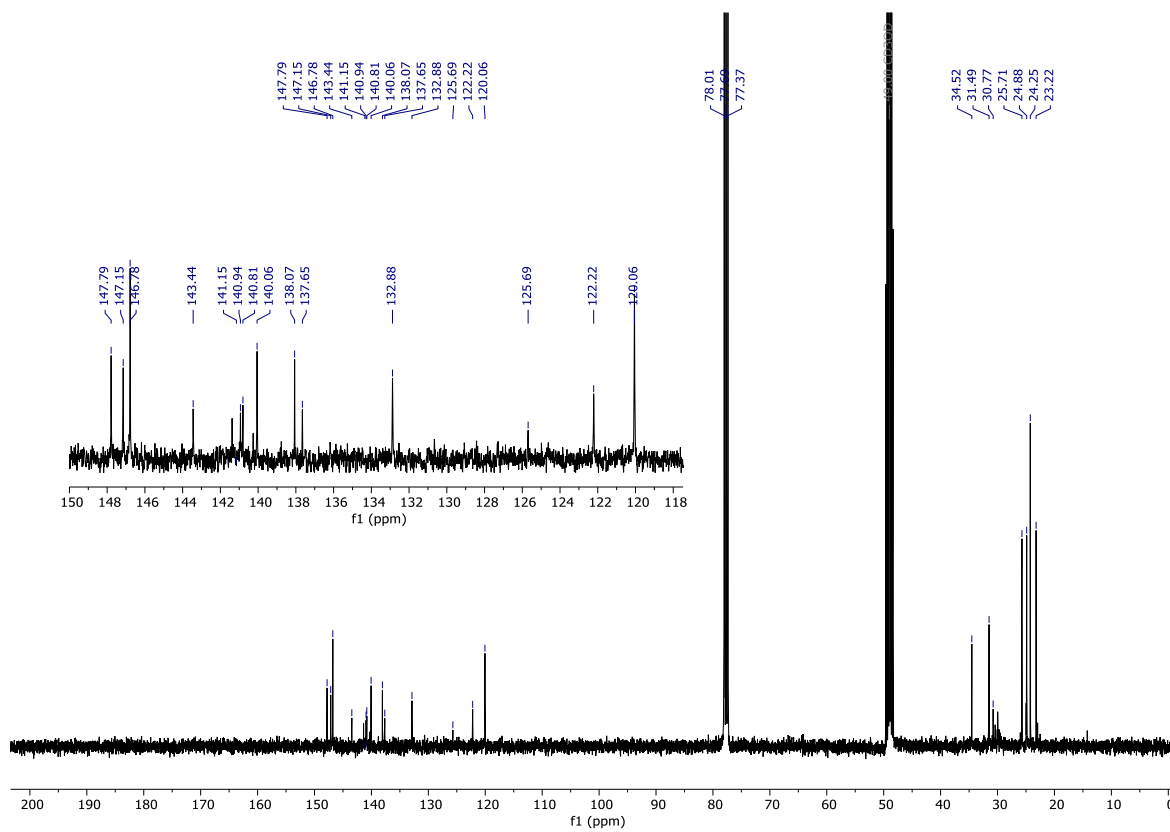

<sup>1</sup>H NMR (500 MHz, C<sub>6</sub>D<sub>6</sub>) of C<sup>2+</sup>A<sup>4-</sup>

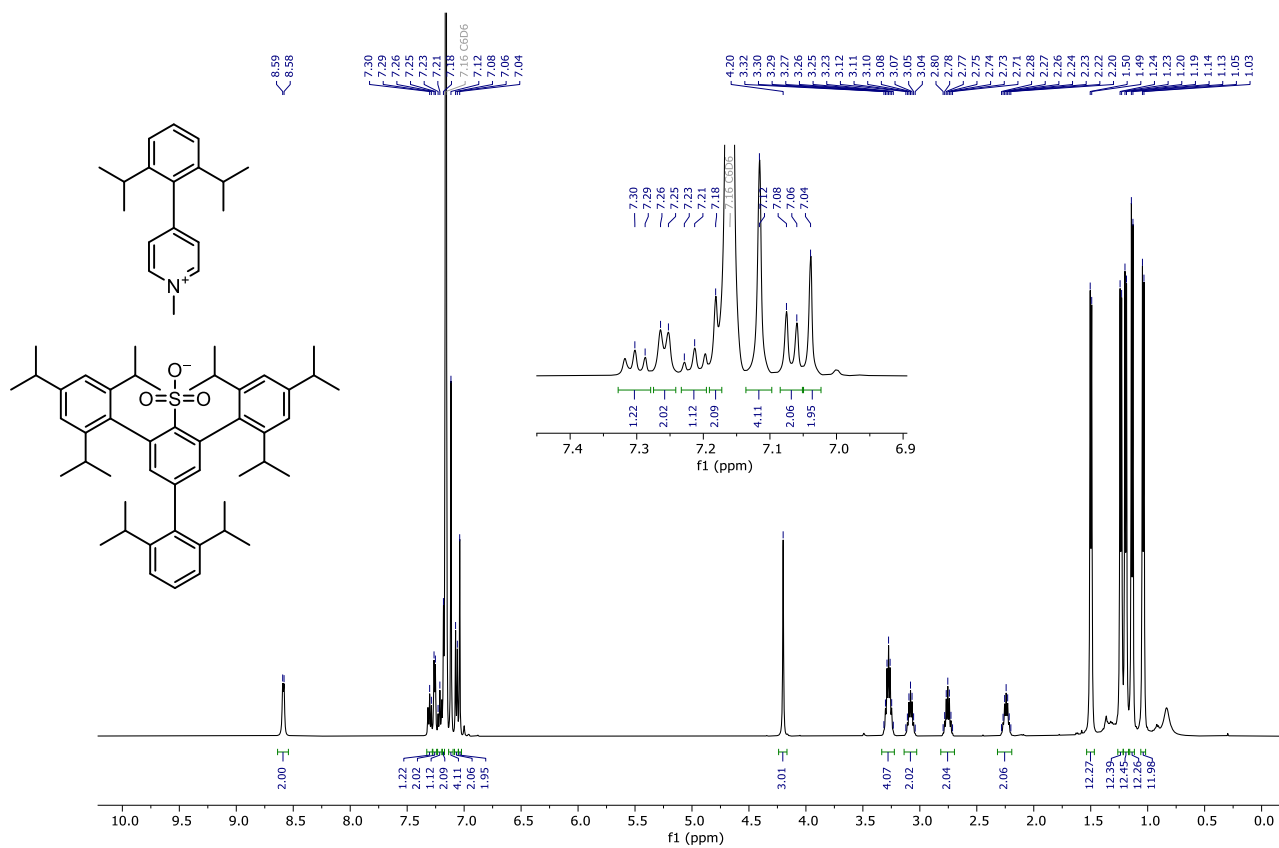

<sup>13</sup>C NMR (126 MHz, C<sub>6</sub>D<sub>6</sub>) of C<sup>2+</sup>A<sup>4-</sup>

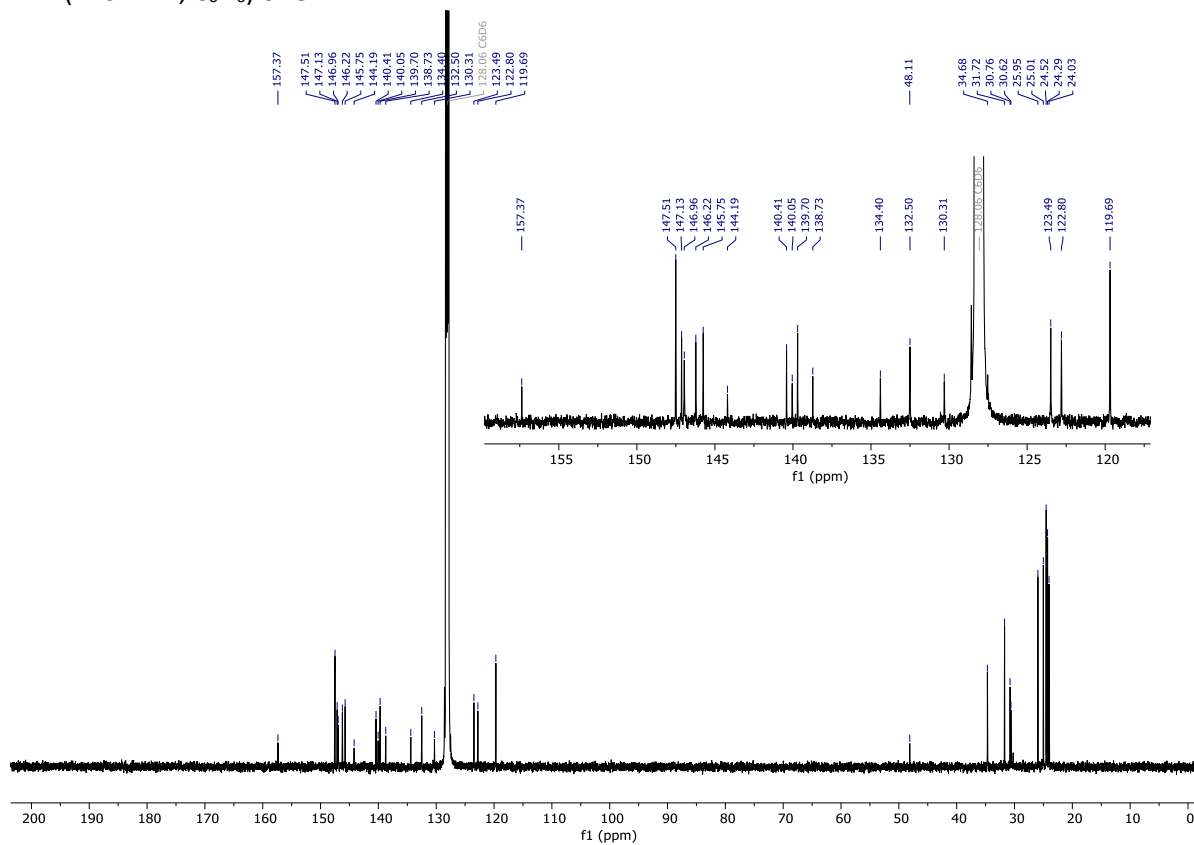

$^1\text{H}$  NMR (500 MHz,  $\text{C}_6\text{D}_6/\text{CDCl}_3$  9:1) of  $\text{C4}^+\text{A2}^-$

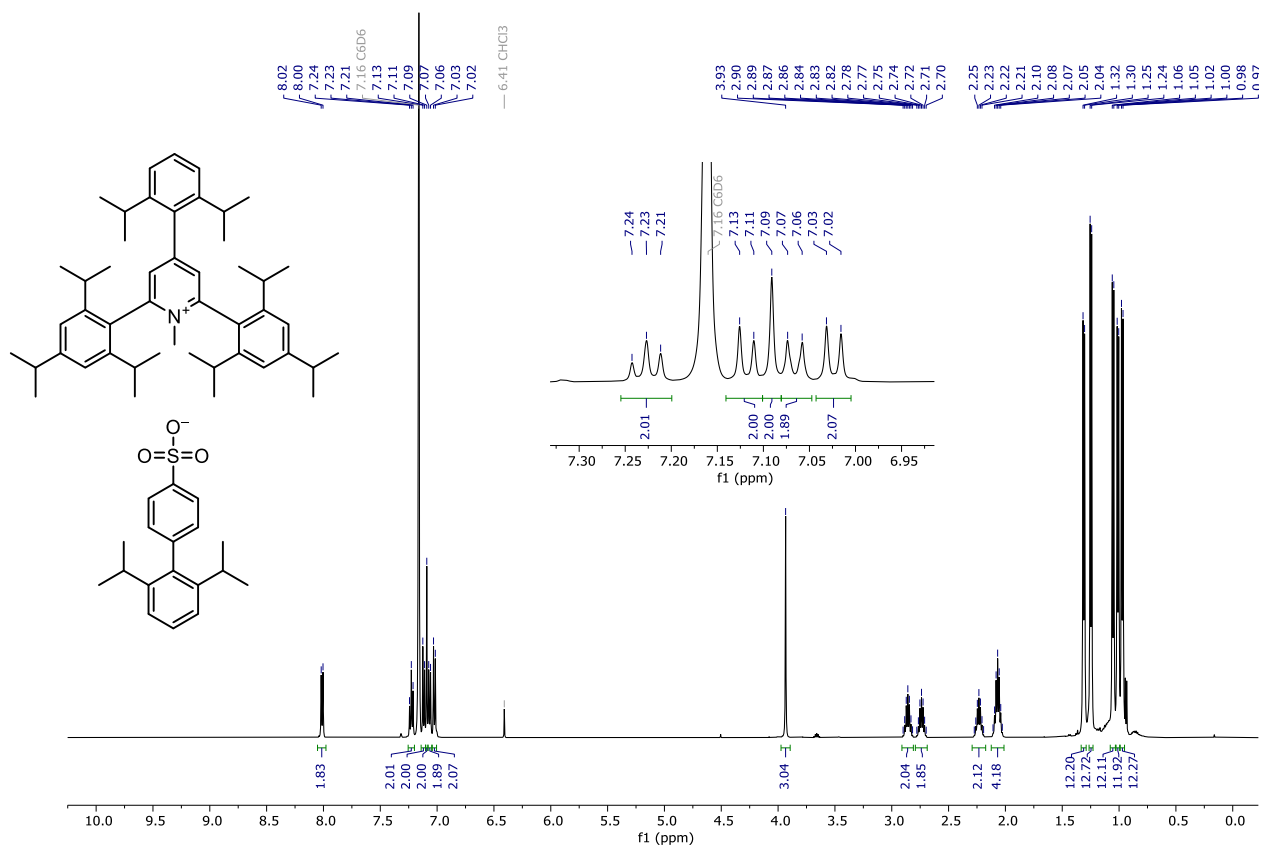

$^{13}\text{C}$  NMR (101 MHz,  $\text{CDCl}_3$ ) of  $\text{C4}^+\text{A2}^-$

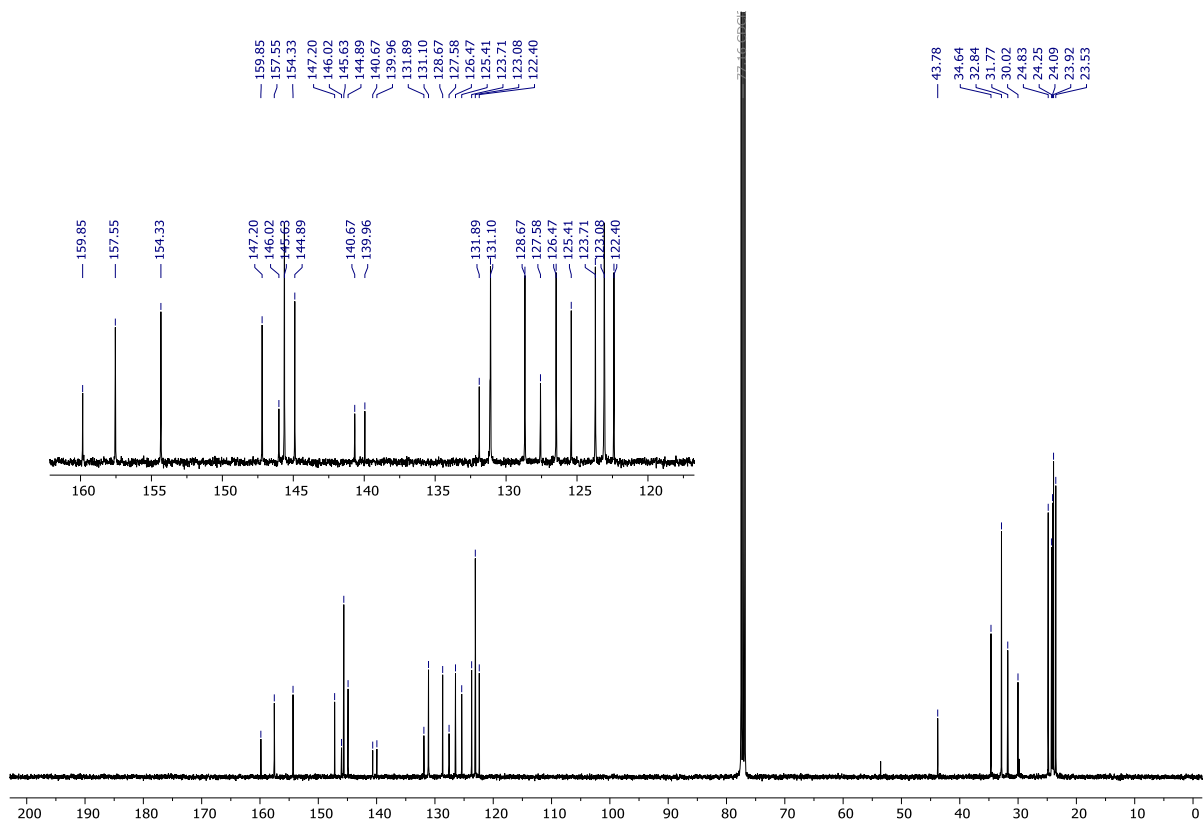

$^1\text{H}$  NMR (500 MHz,  $\text{C}_6\text{D}_6$ ) of  $\text{C3}^+\text{A3}^-$

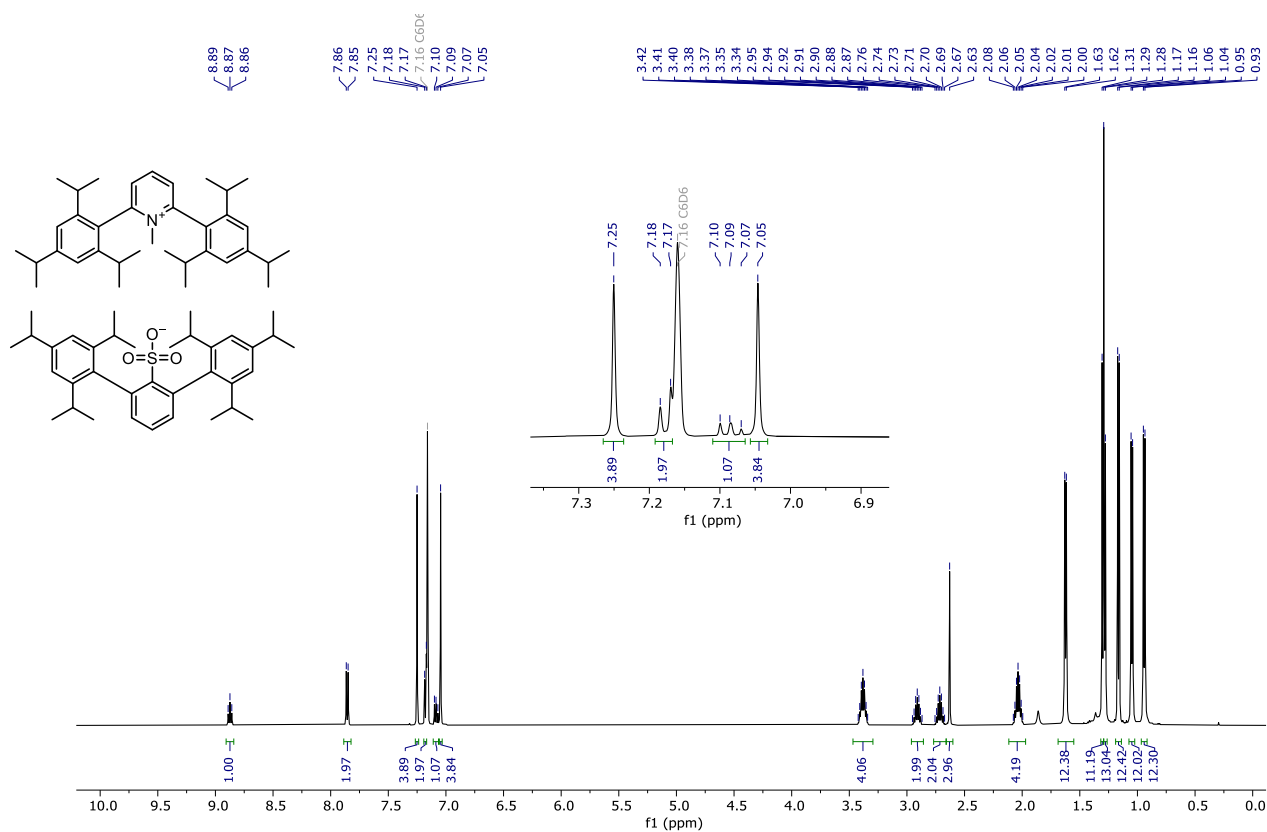

$^{13}\text{C}$  NMR (126 MHz,  $\text{C}_6\text{D}_6$ ) of  $\text{C3}^+\text{A3}^-$

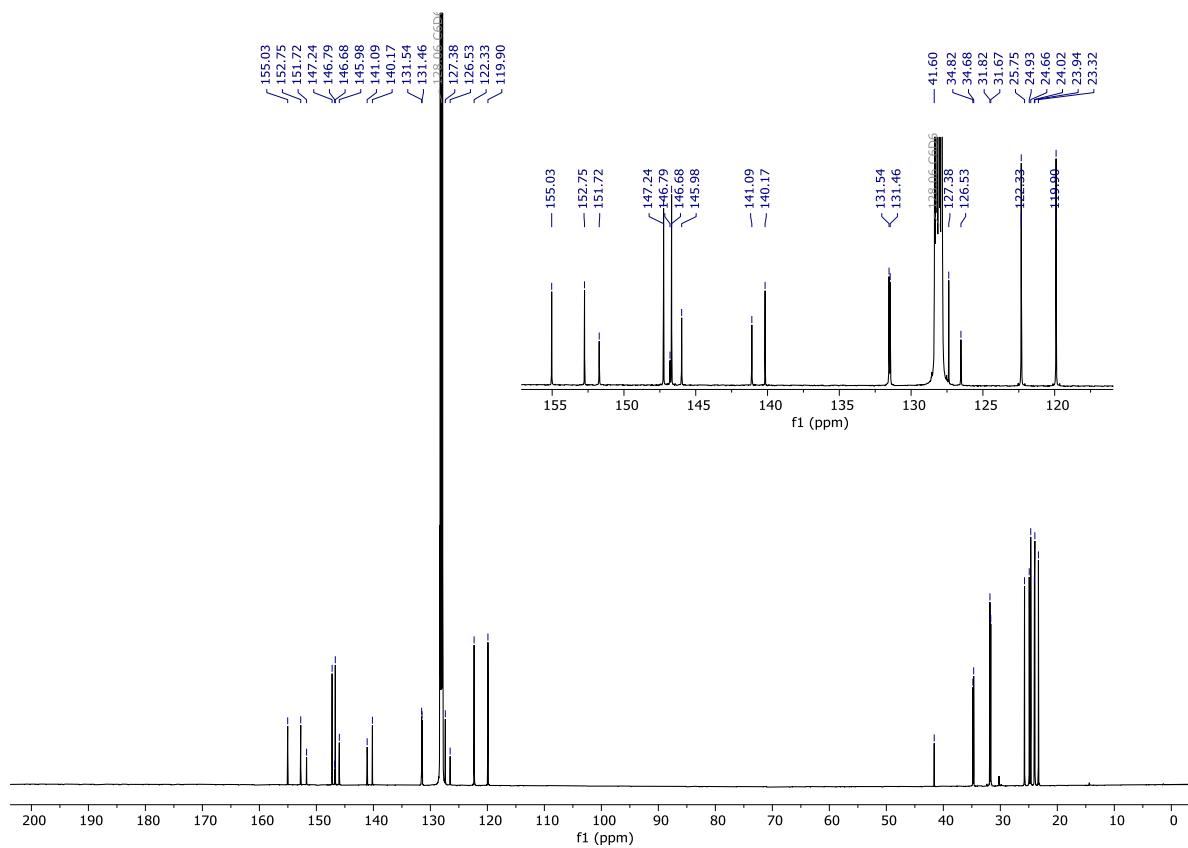

COSY (C<sub>6</sub>D<sub>6</sub>) of C3<sup>+</sup>A3<sup>-</sup>

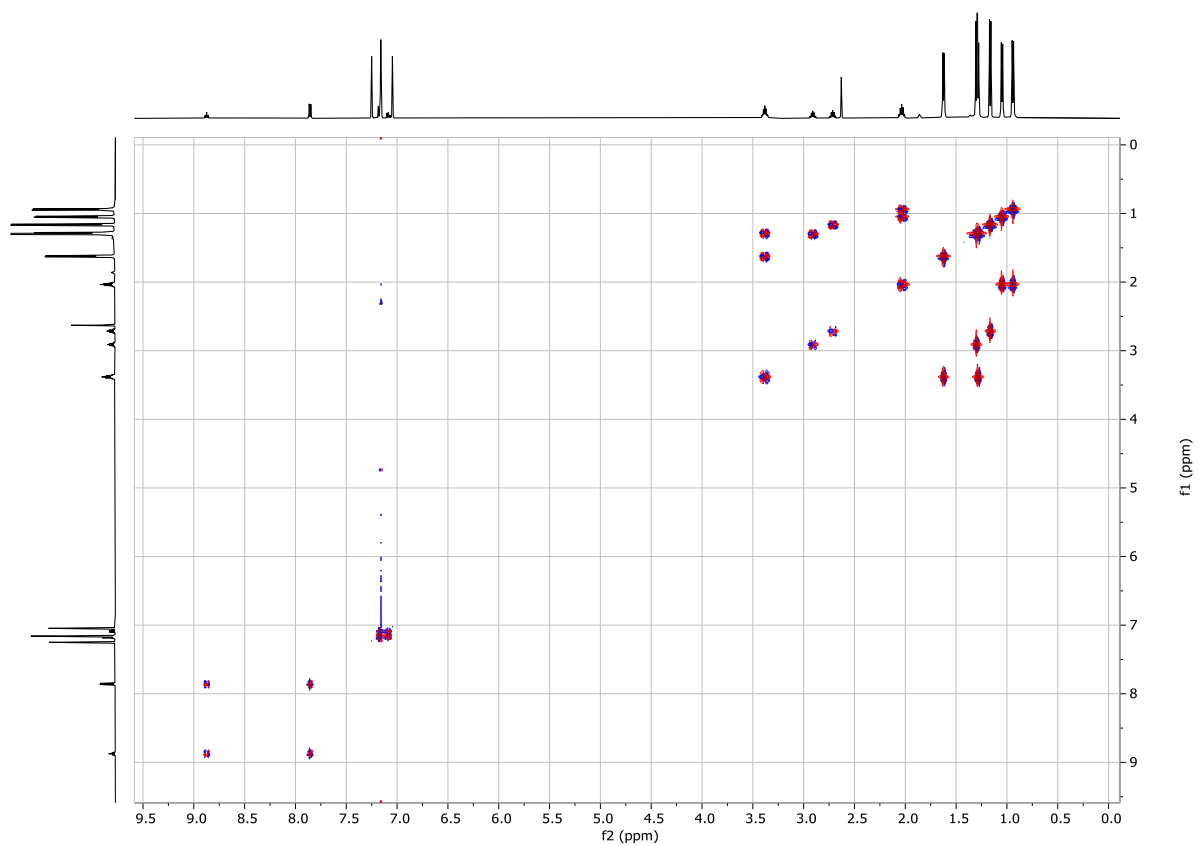

Excerpt from COSY of C3<sup>+</sup>A3<sup>-</sup>

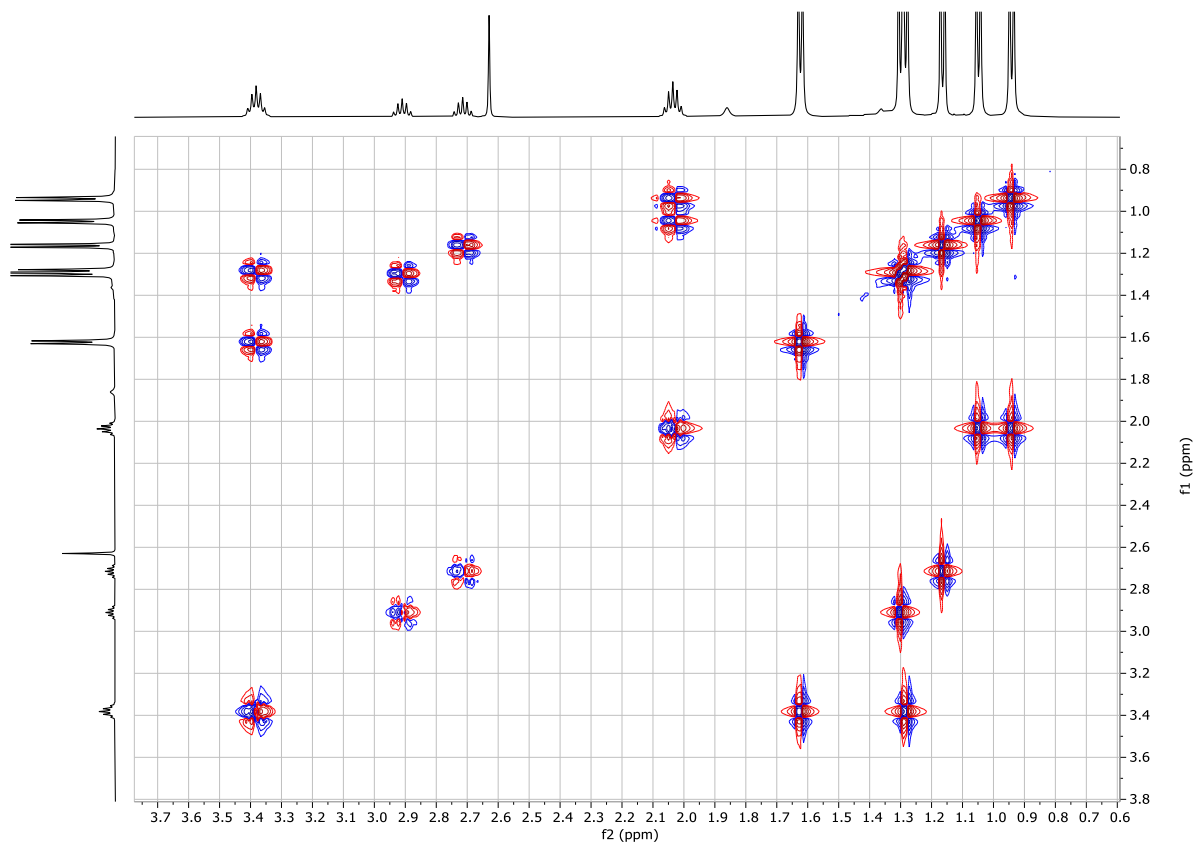

HSQC ( $C_6D_6$ ) of  $C3^+A3^-$

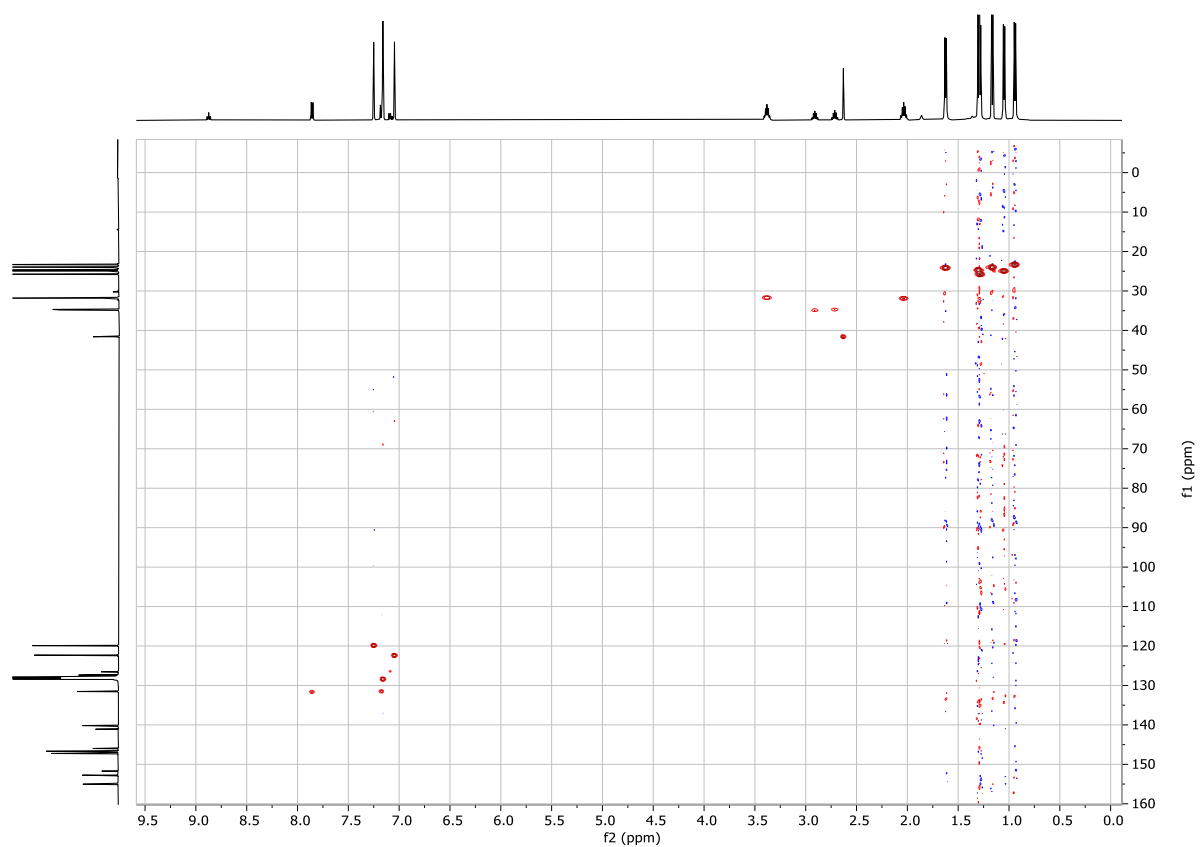

Excerpt from HSQC of  $C3^+A3^-$

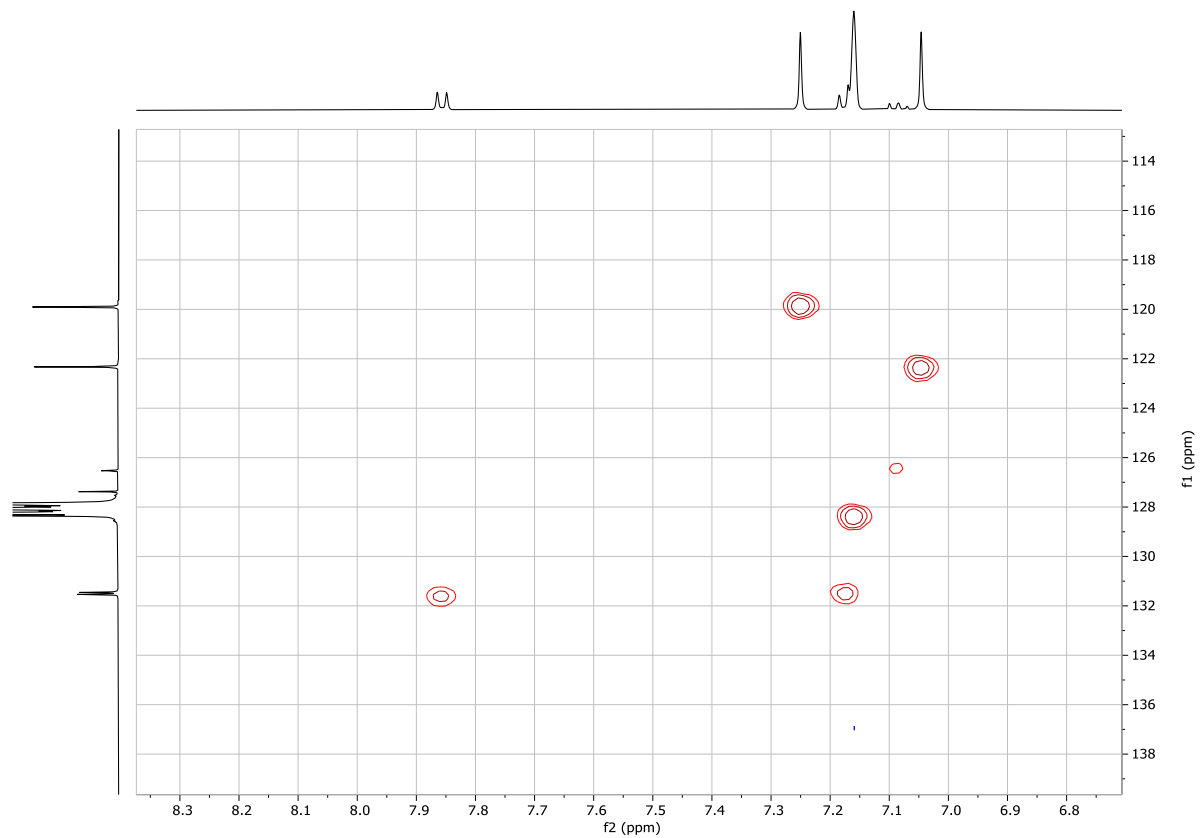

Excerpt from HSQC of  $C3^+A3^-$

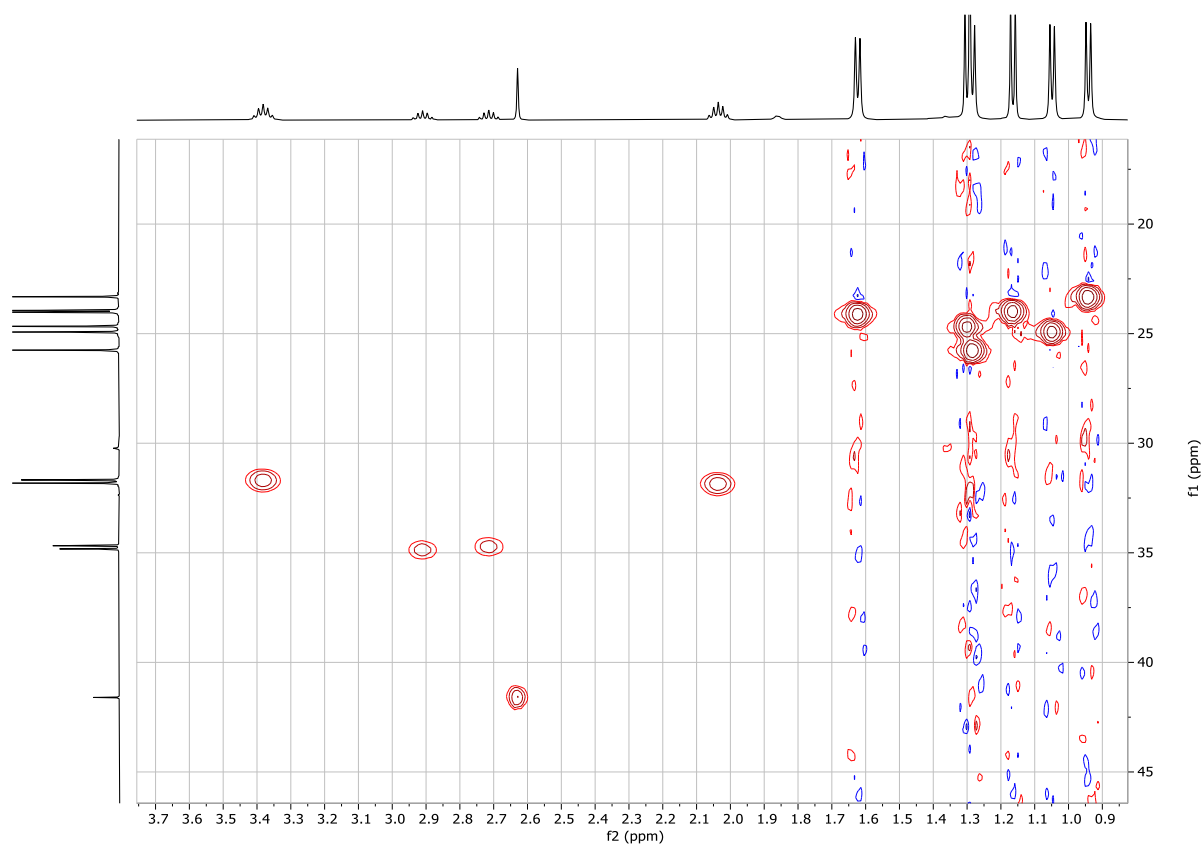

HMBC ( $C_6D_6$ ) of  $C3^+A3^-$

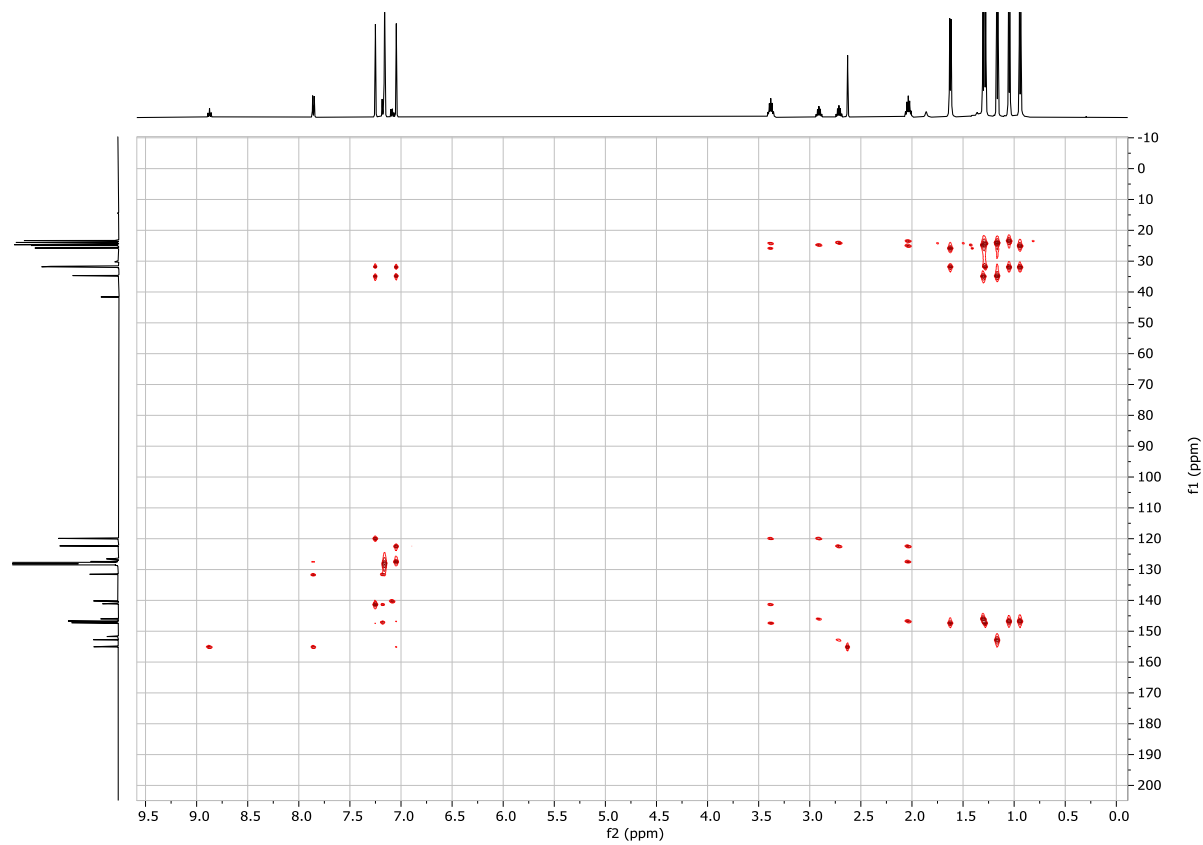



Excerpt from HMBC of  $C3^+A3^-$

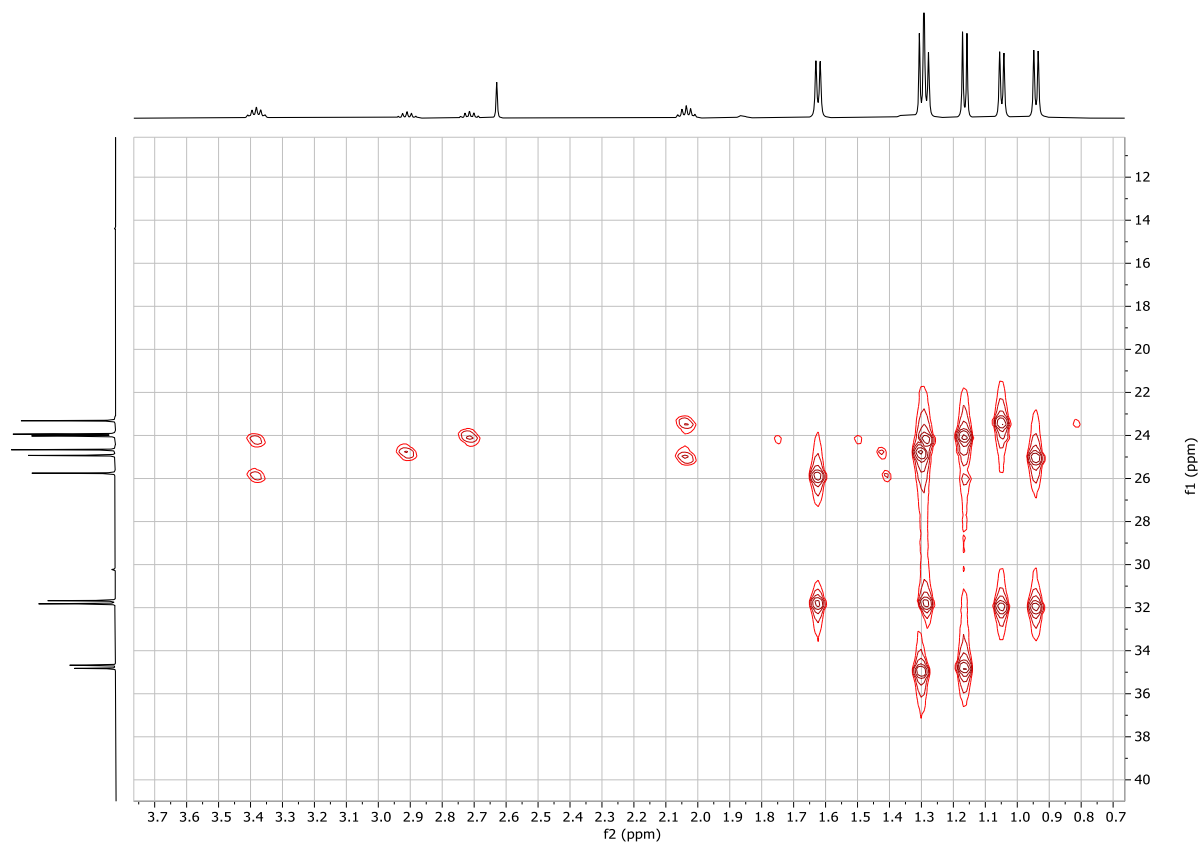

Excerpt from HMBC of  $C3^+A3^-$

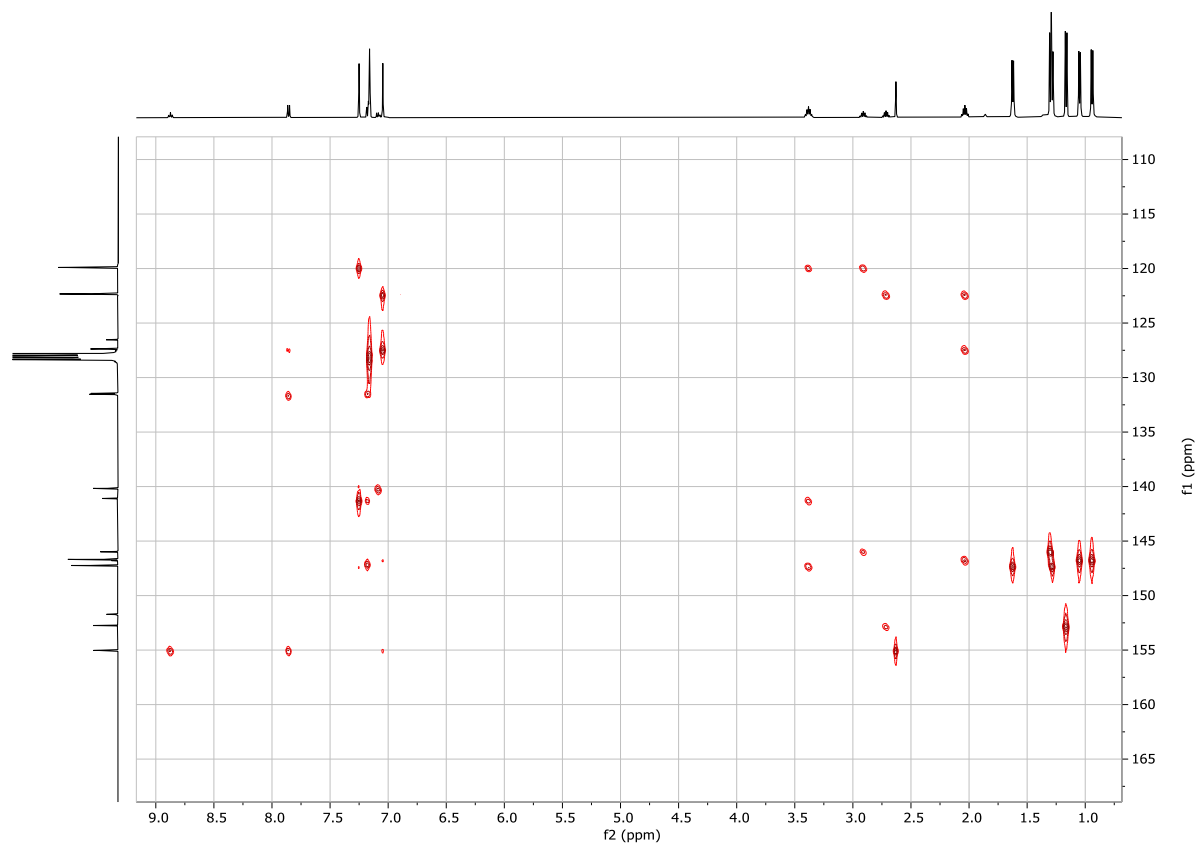

ROESY of  $C3^+A3^-$

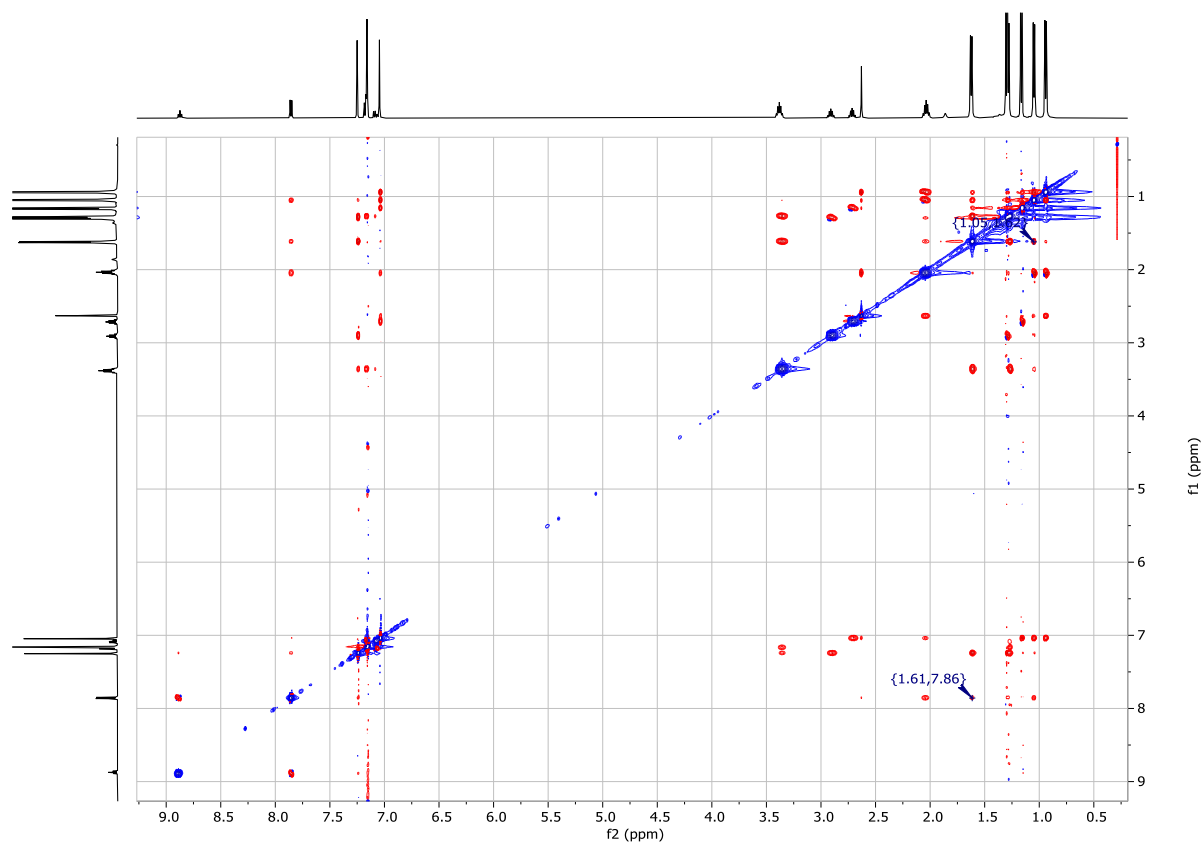

$^1\text{H}$  NMR (500 MHz,  $\text{C}_6\text{D}_6$ ) of **1**

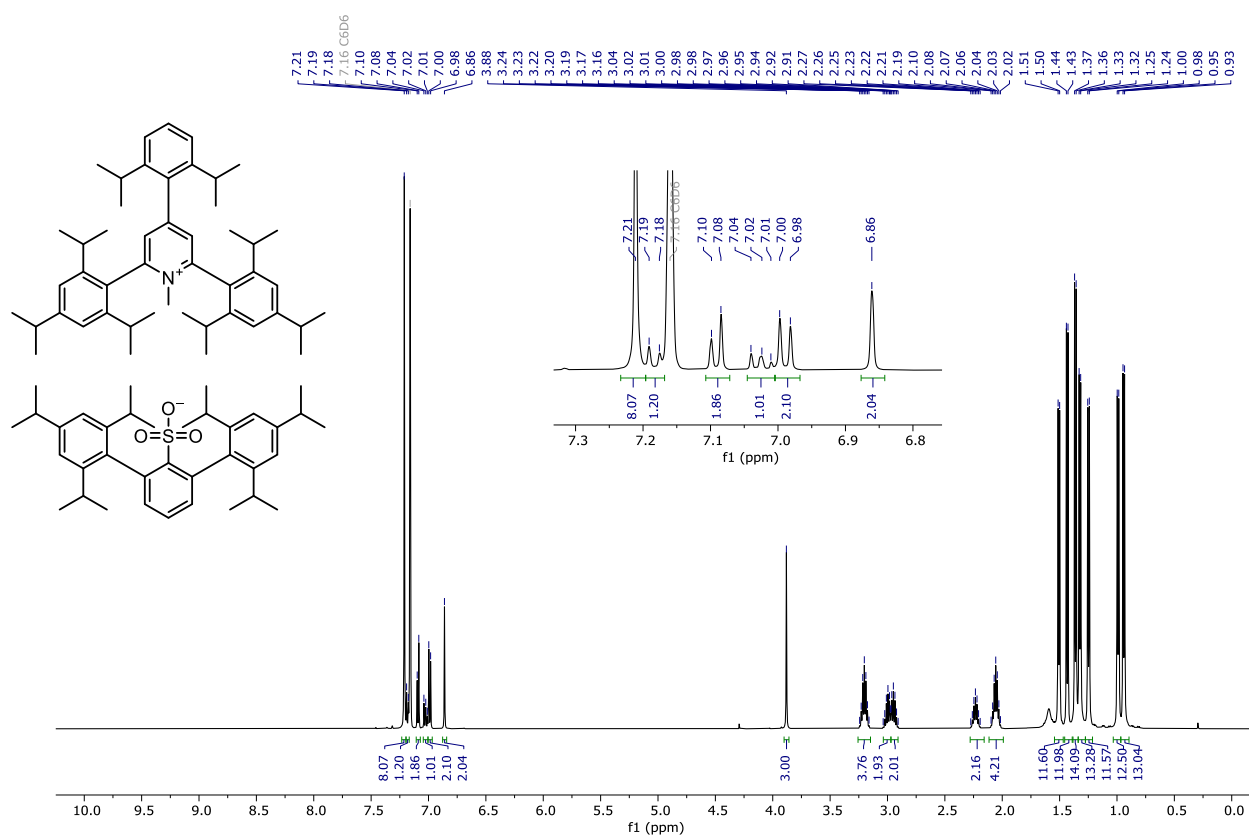

$^{13}\text{C}$  NMR (126 MHz,  $\text{C}_6\text{D}_6$ ) of **1**

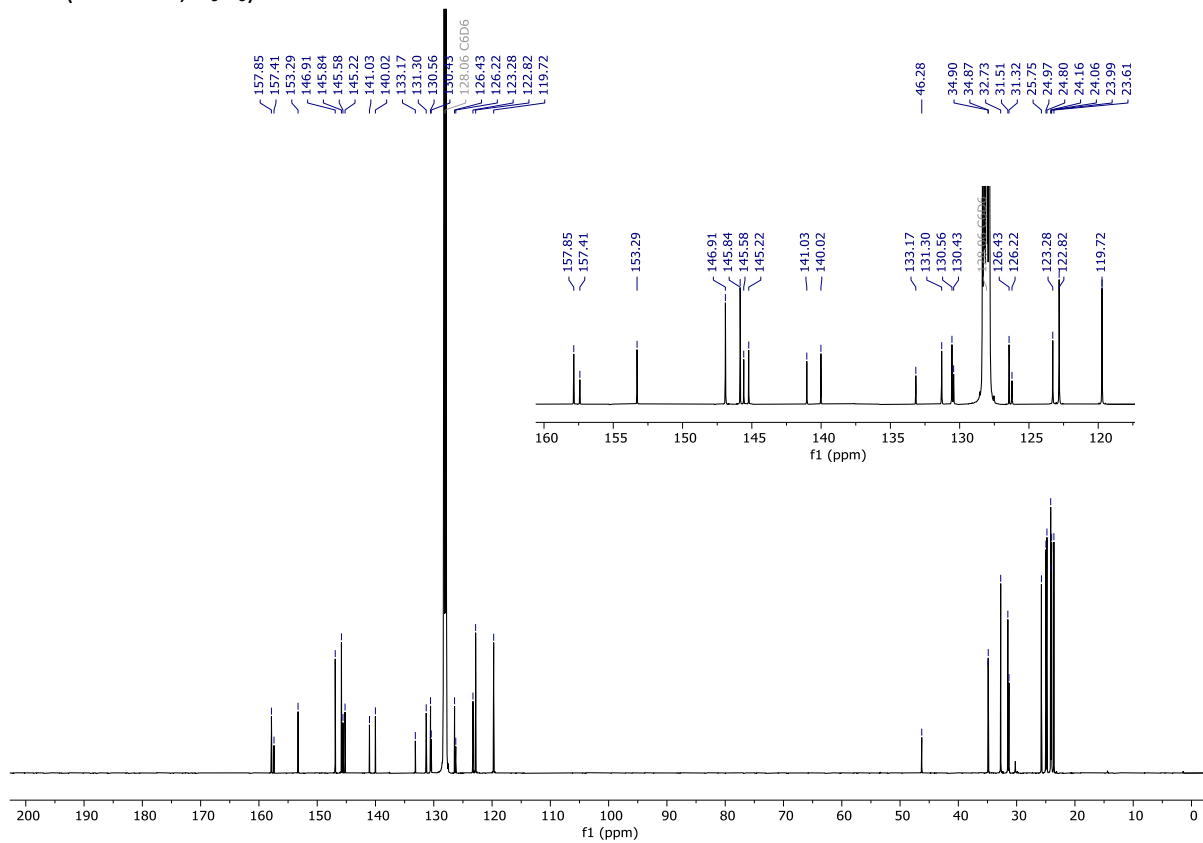

<sup>1</sup>H NMR (400 MHz, CDCl<sub>3</sub>) of **2**

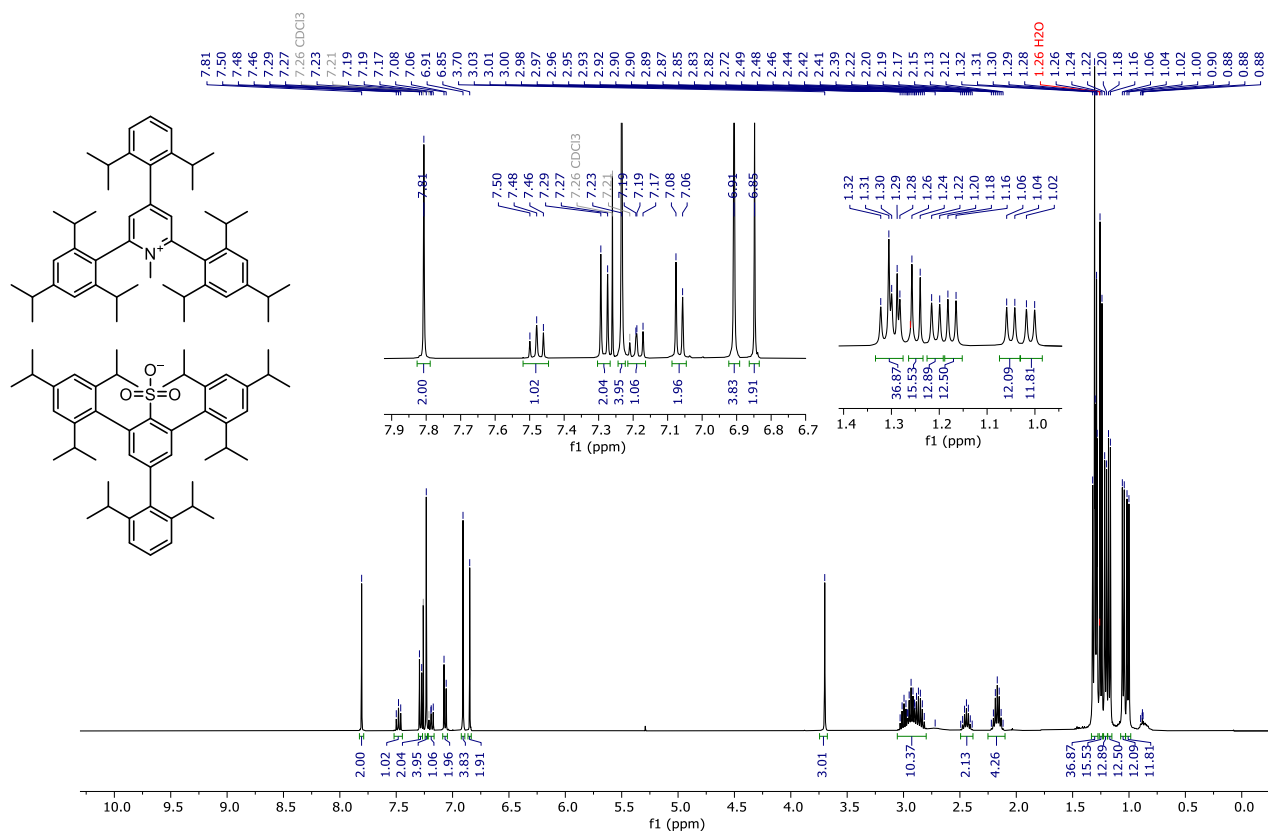

<sup>13</sup>C NMR (101 MHz, CDCl<sub>3</sub>) of **2**

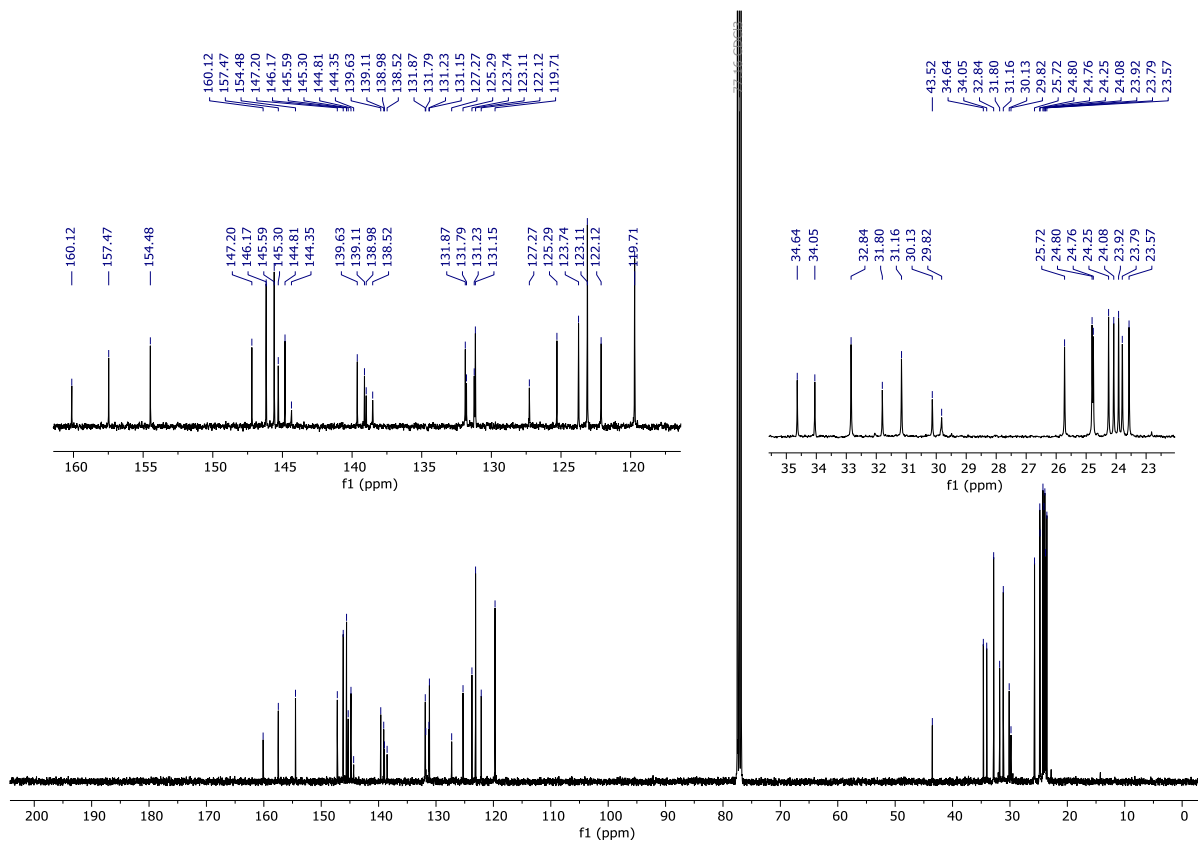

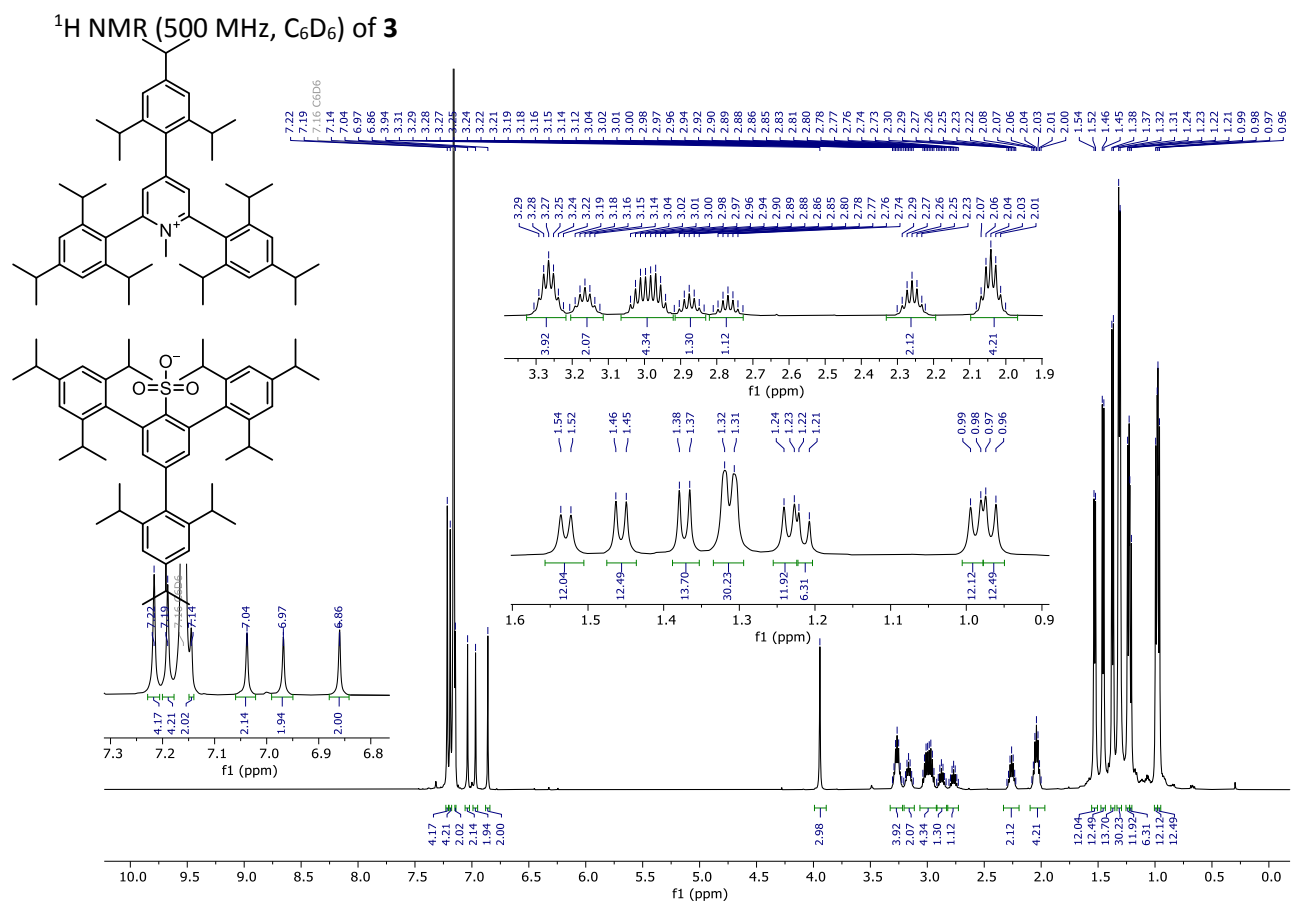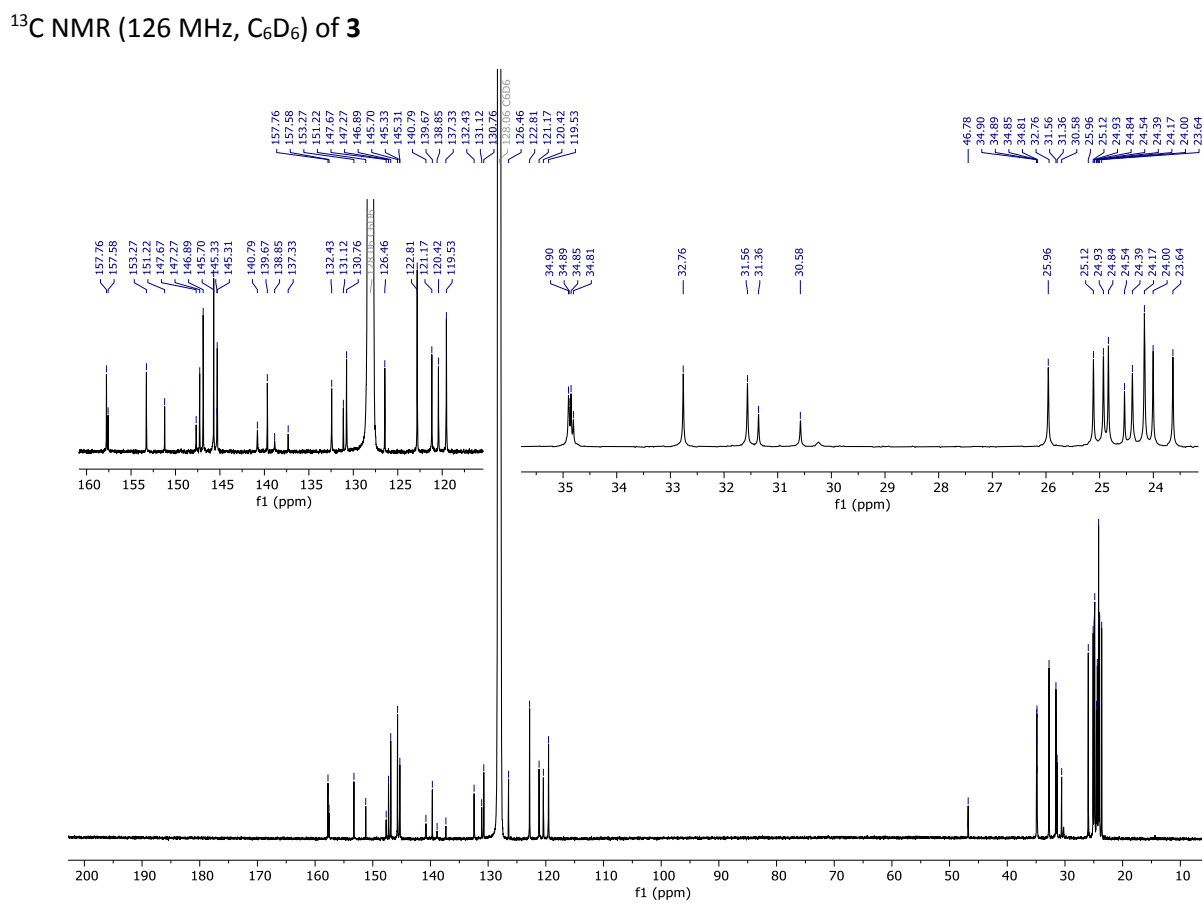

COSY (C<sub>6</sub>D<sub>6</sub>) of **3**

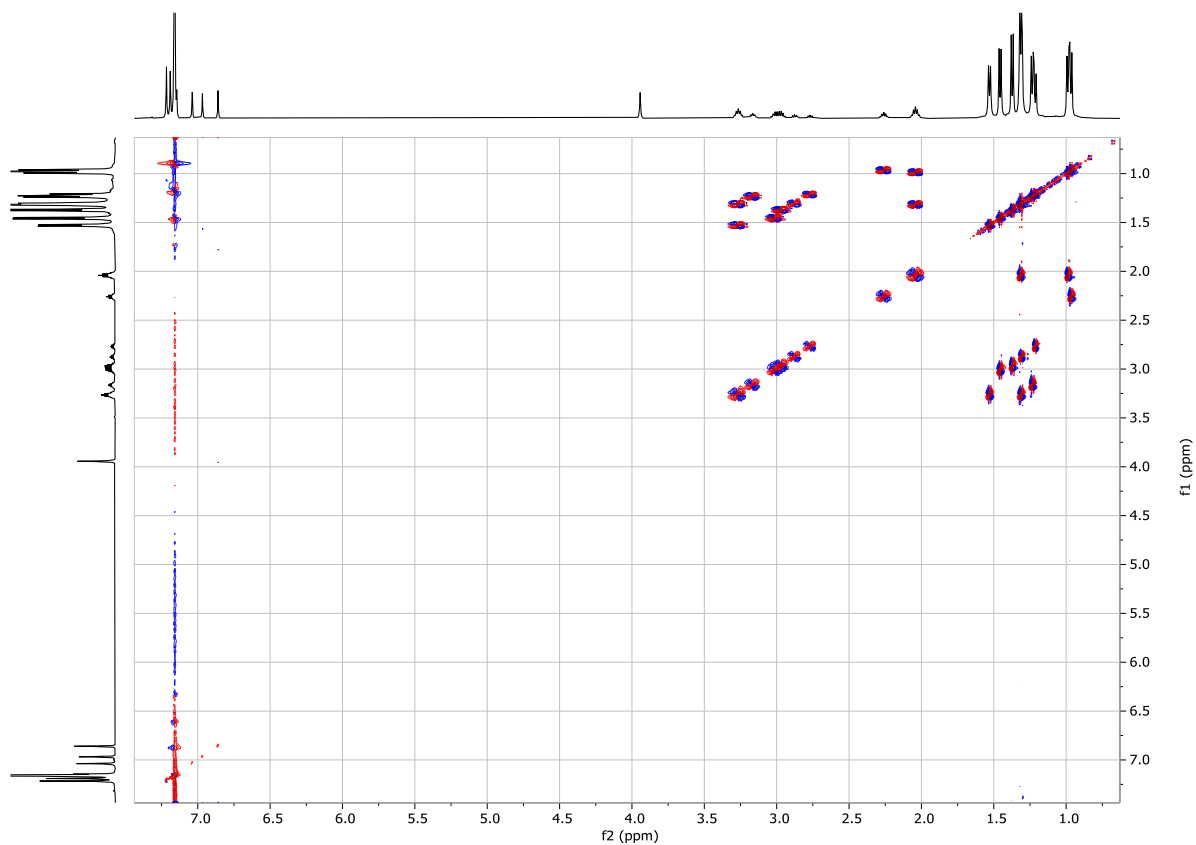

Excerpt from COSY (C<sub>6</sub>D<sub>6</sub>) of **3**

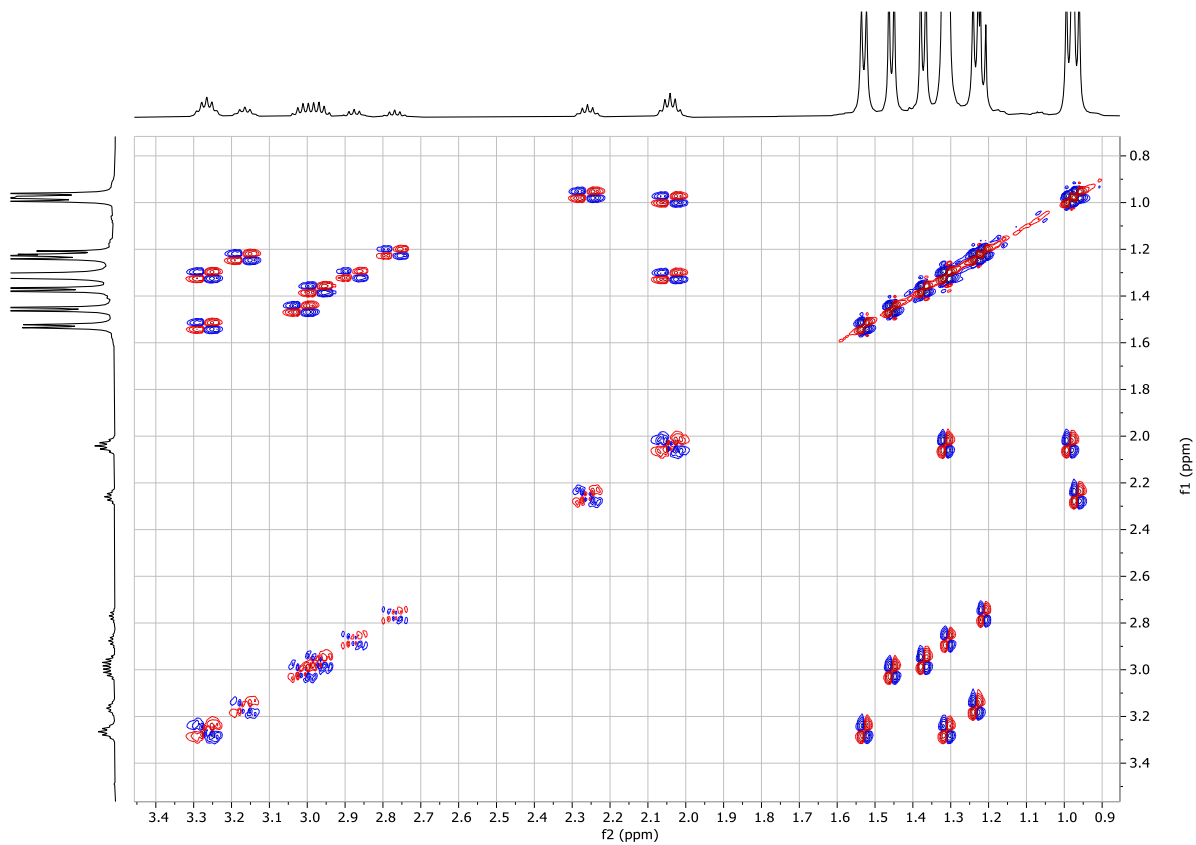

HSQC (C<sub>6</sub>D<sub>6</sub>) of **3**

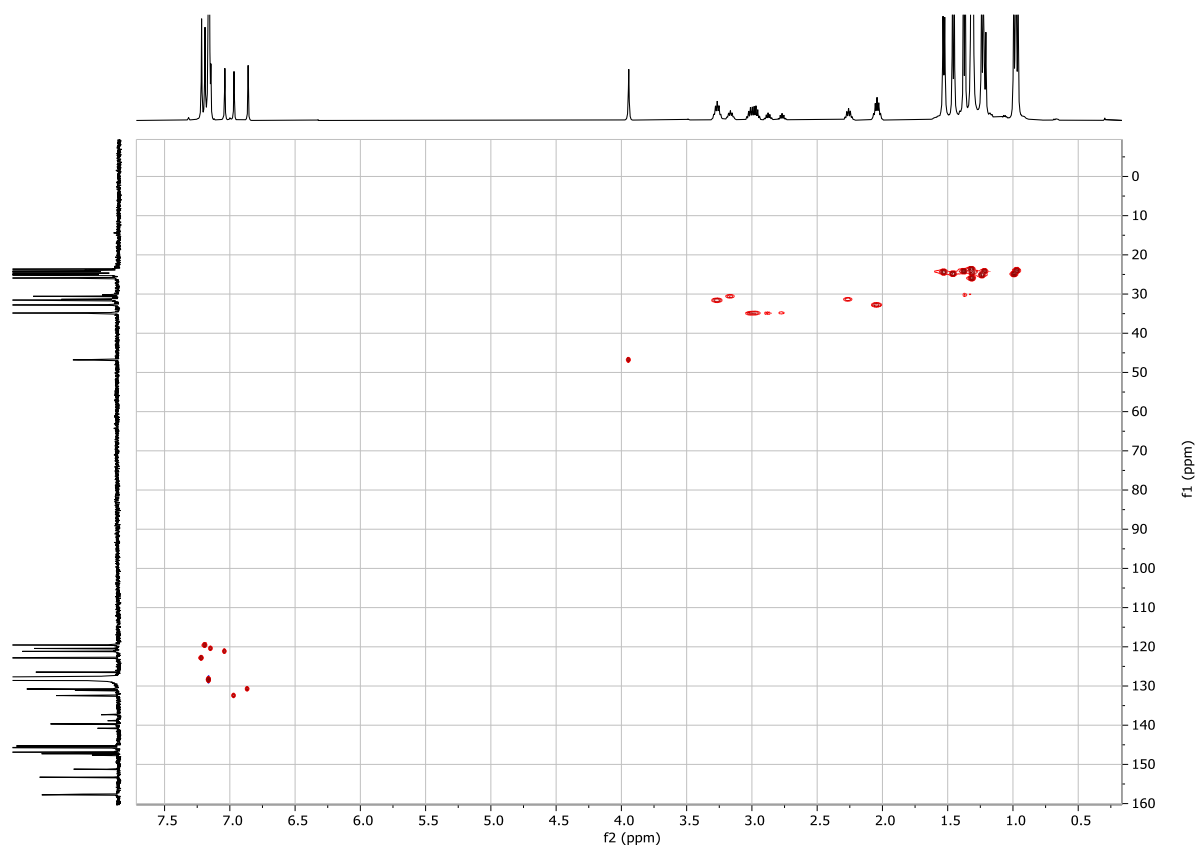

Excerpt from HSQC(C<sub>6</sub>D<sub>6</sub>) of **3**

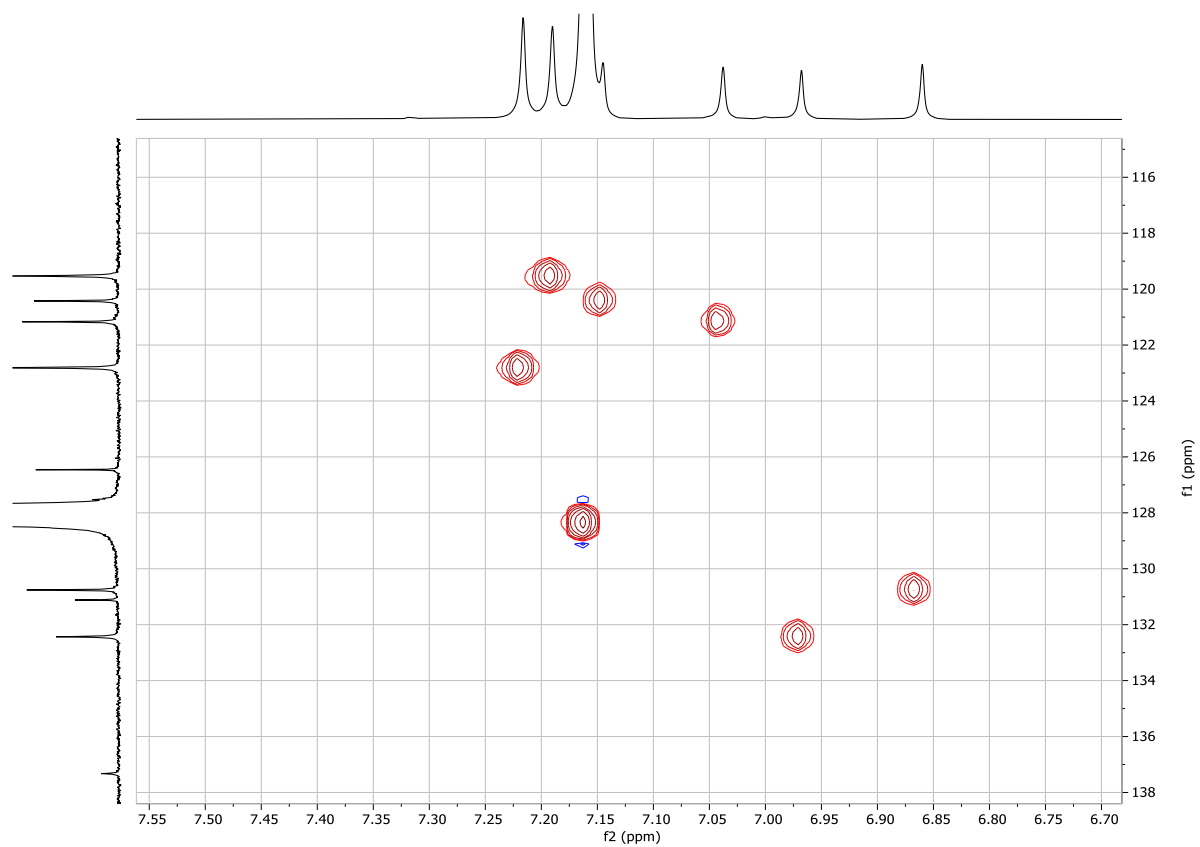

Excerpt from HSQC(C<sub>6</sub>D<sub>6</sub>) of **3**

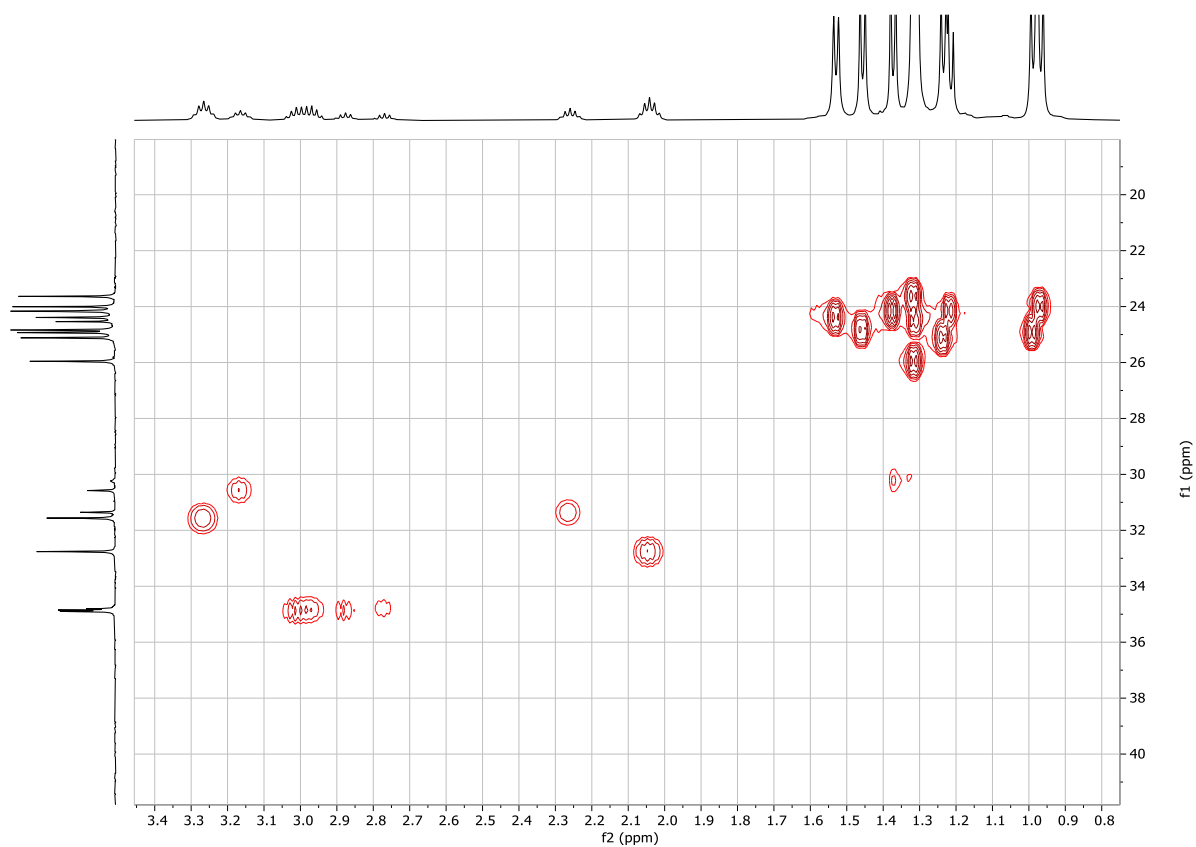

HMBC(C<sub>6</sub>D<sub>6</sub>) of **3**

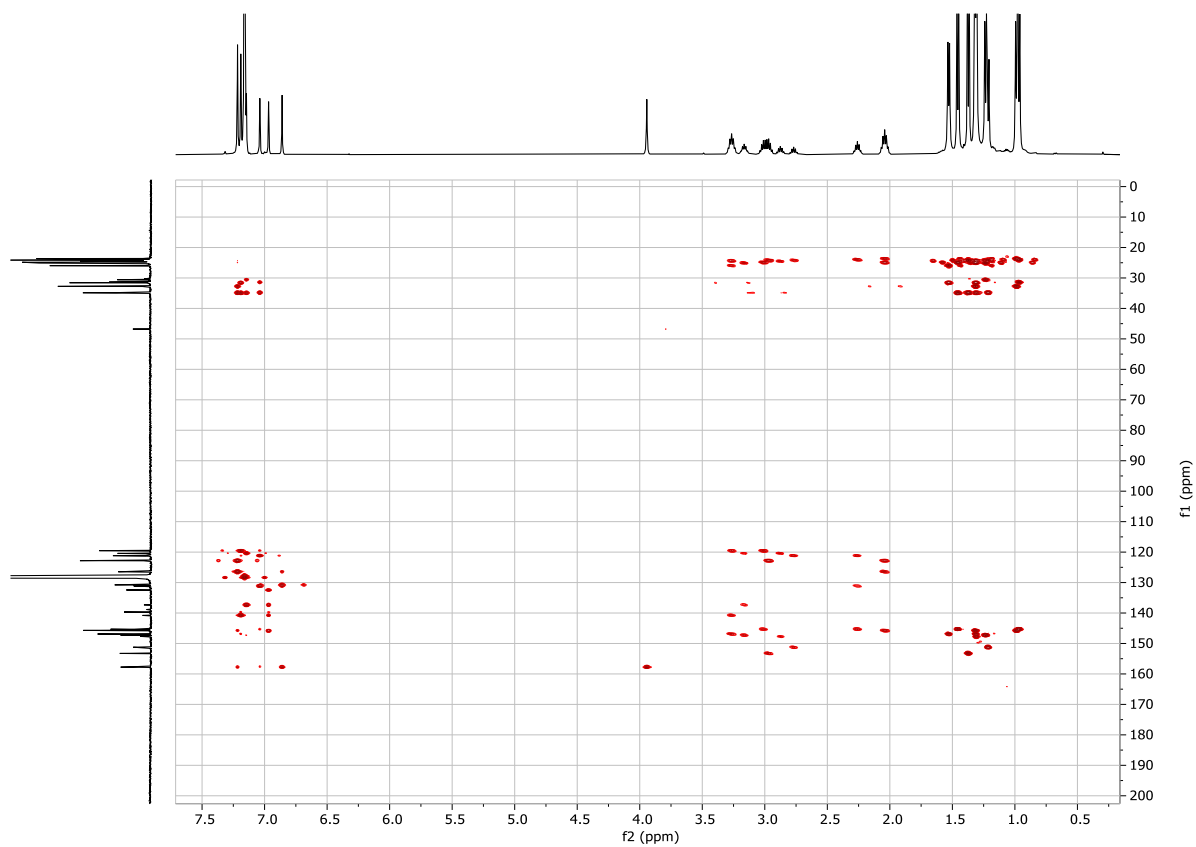



Excerpt from HMBC ( $C_6D_6$ ) of **3**

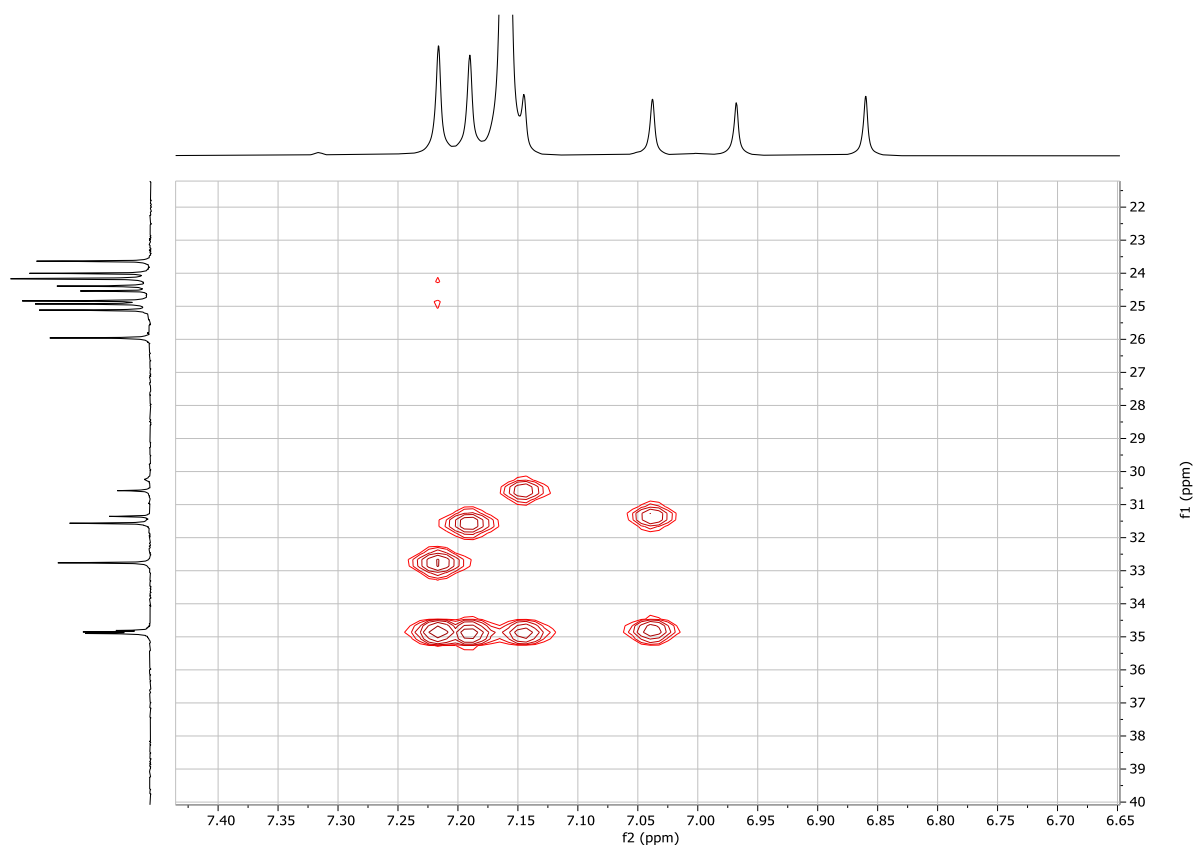

Excerpt from HMBC ( $C_6D_6$ ) of **3**

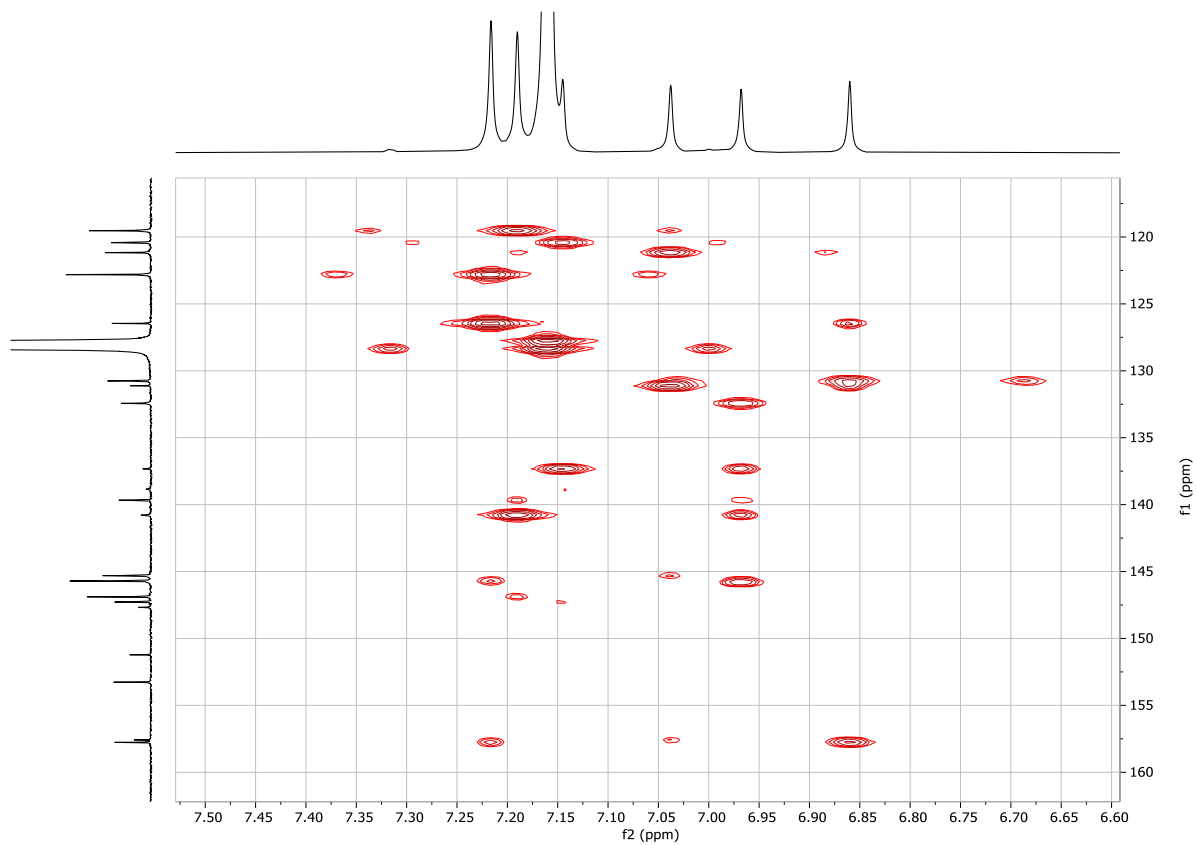

ROESY (C<sub>6</sub>D<sub>6</sub>) of **3**

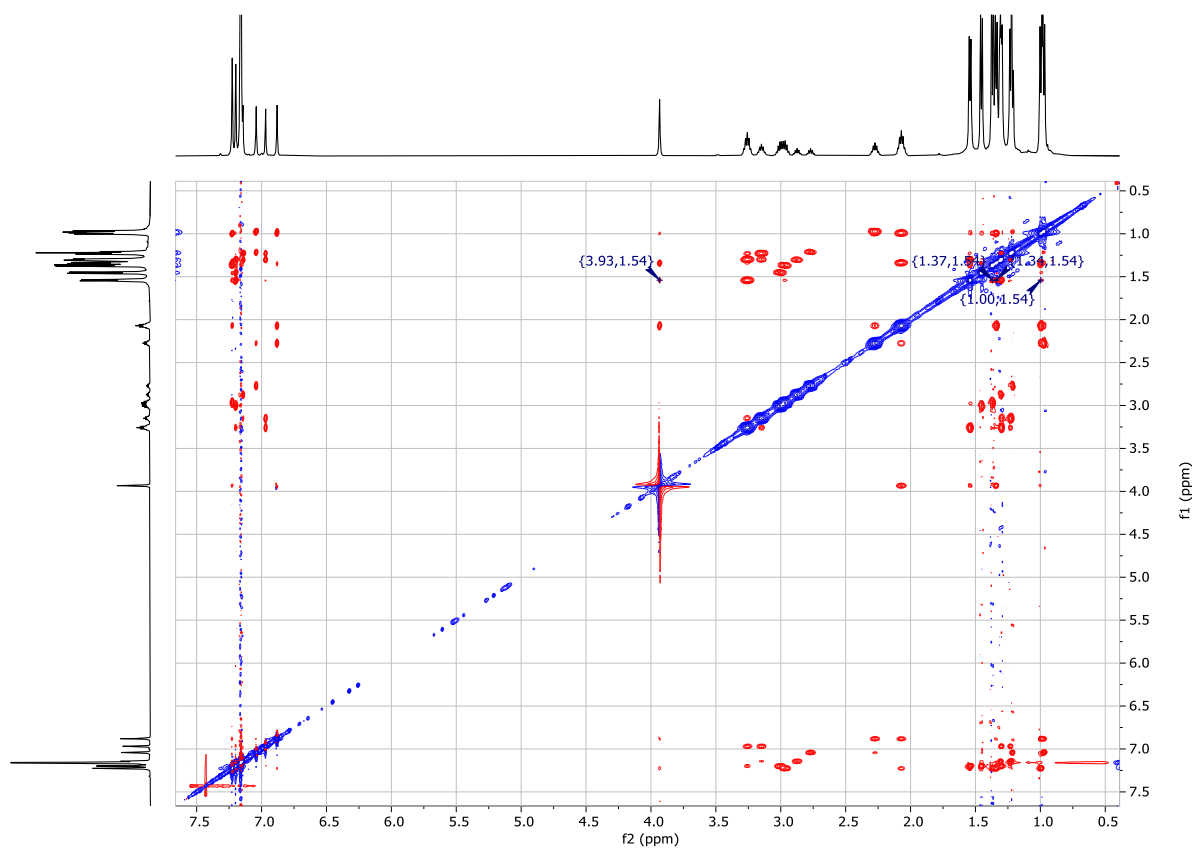

Excerpt from ROESY (C<sub>6</sub>D<sub>6</sub>) of **3**

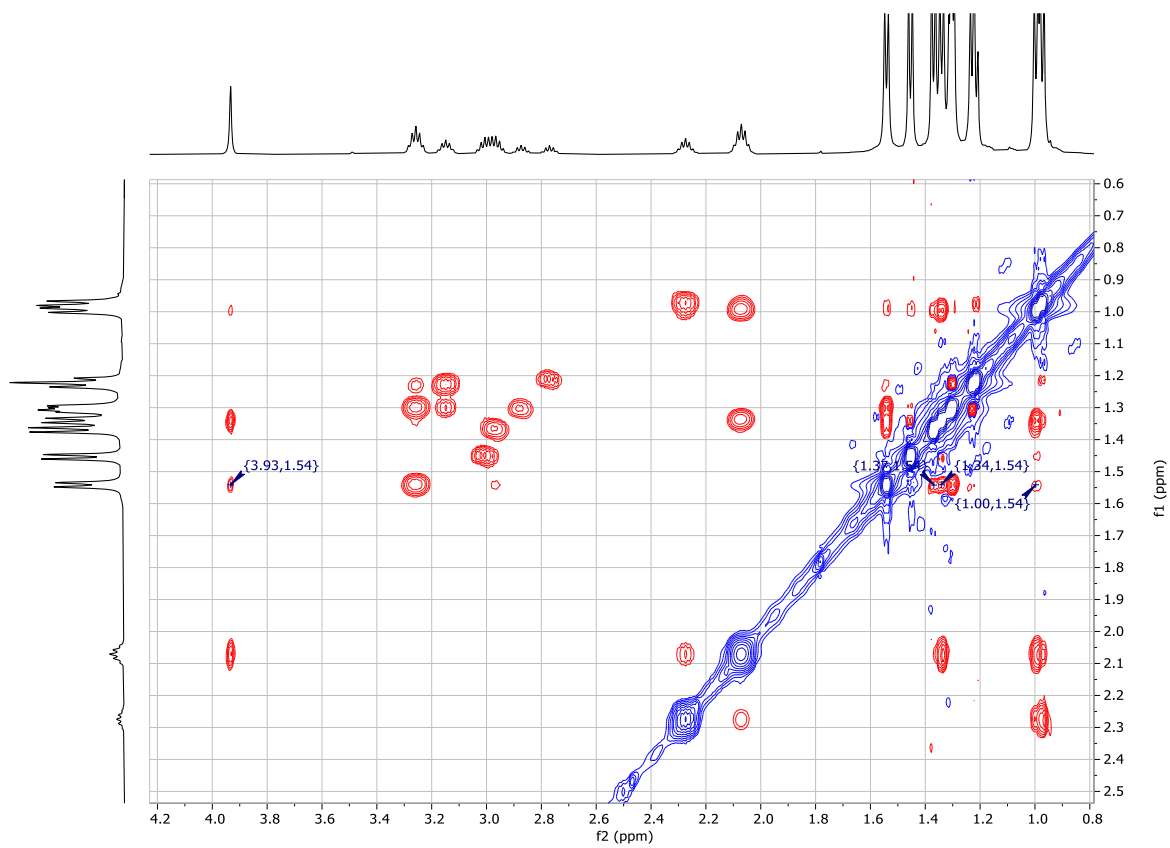

Excerpt from ROESY (C<sub>6</sub>D<sub>6</sub>) of **3**

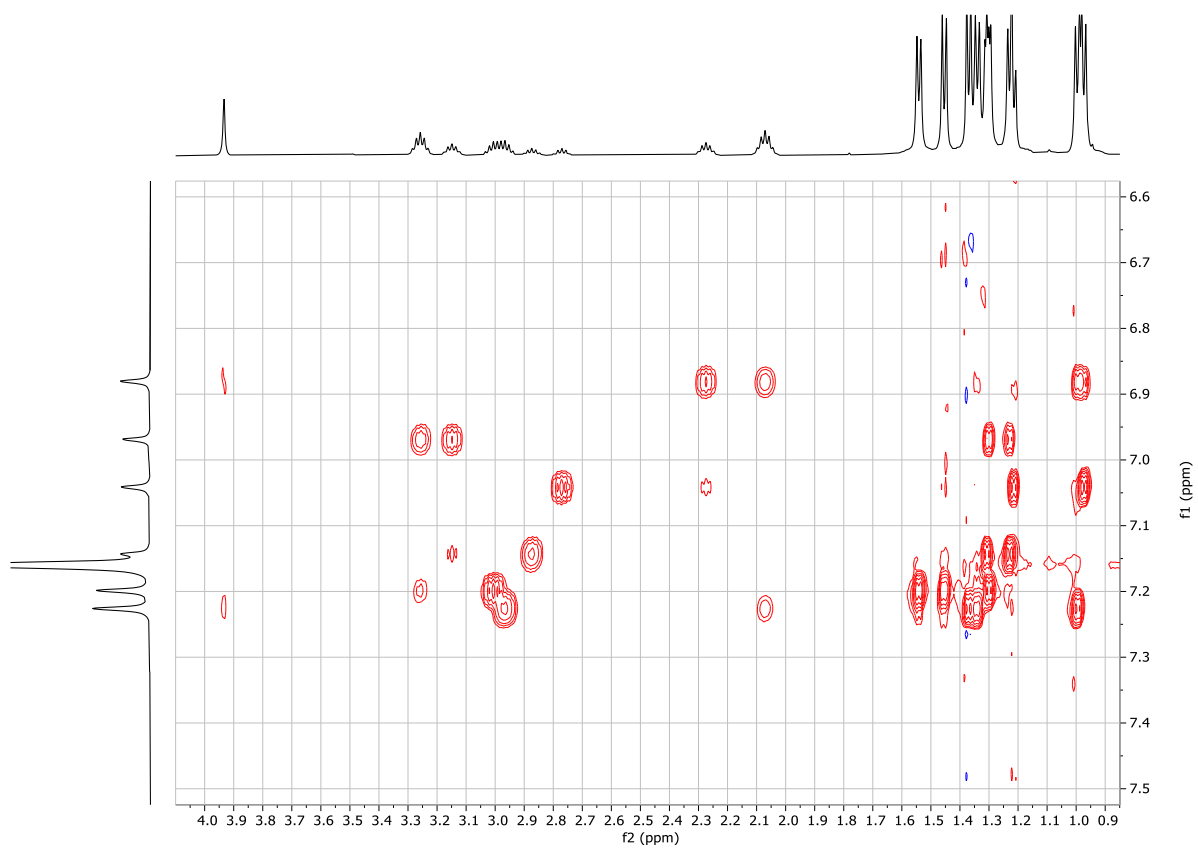



Excerpt from COSY (toluene- $d_8$ ) of **3**

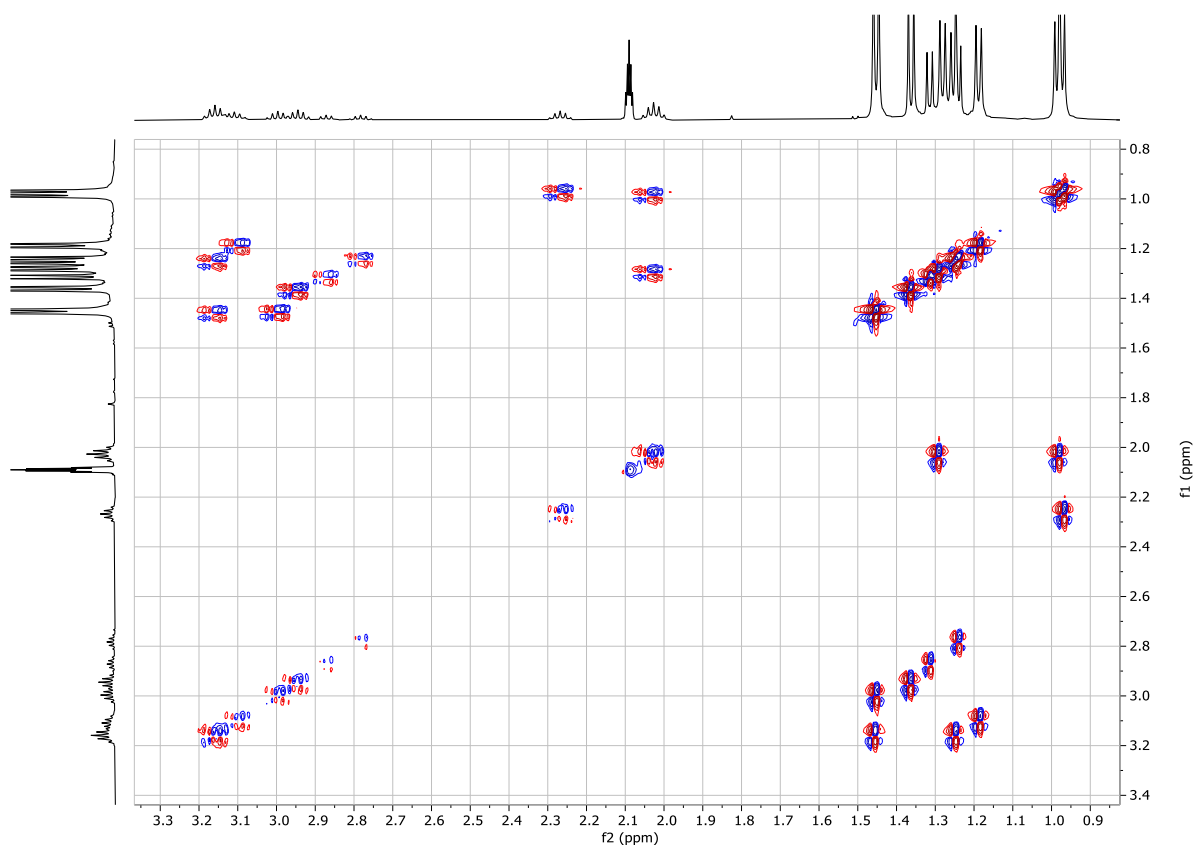

ROESY (toluene- $d_8$ ) of **3**

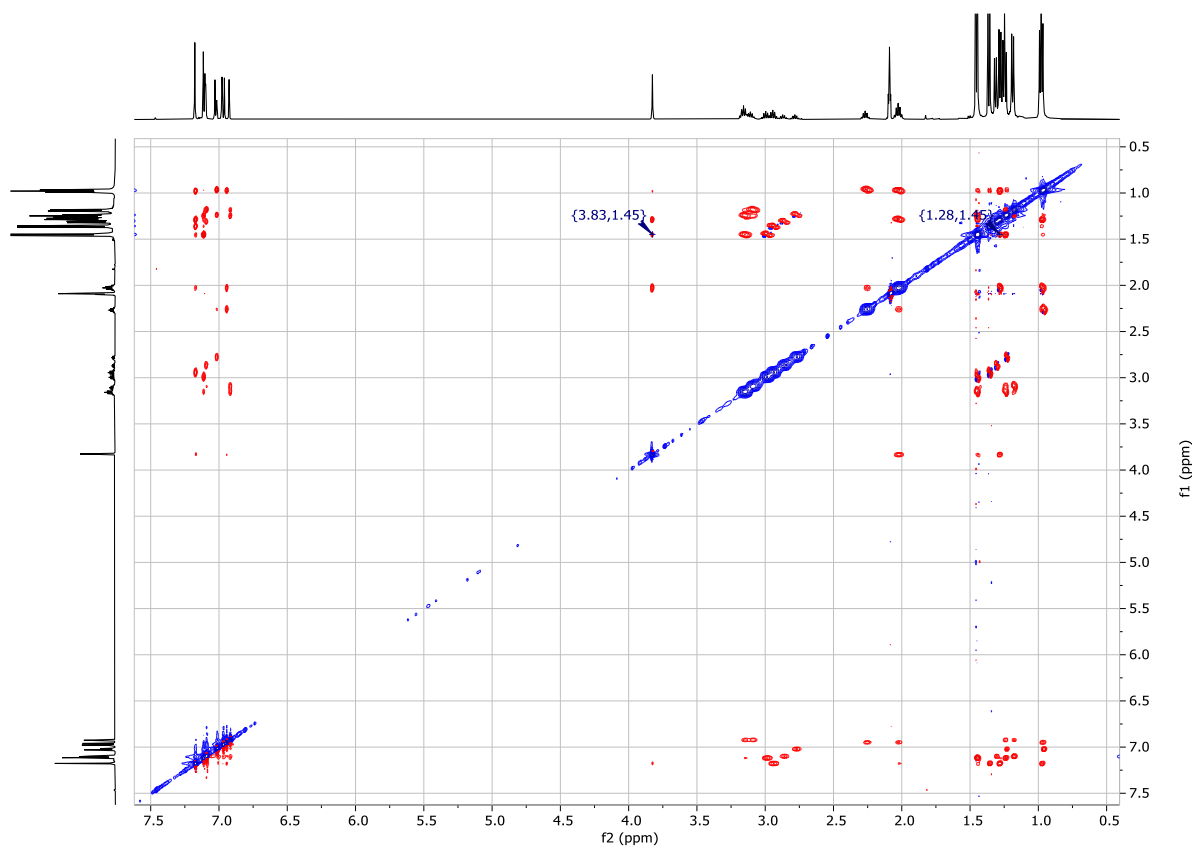

Excerpt from ROESY (toluene- $d_8$ ) of **3**

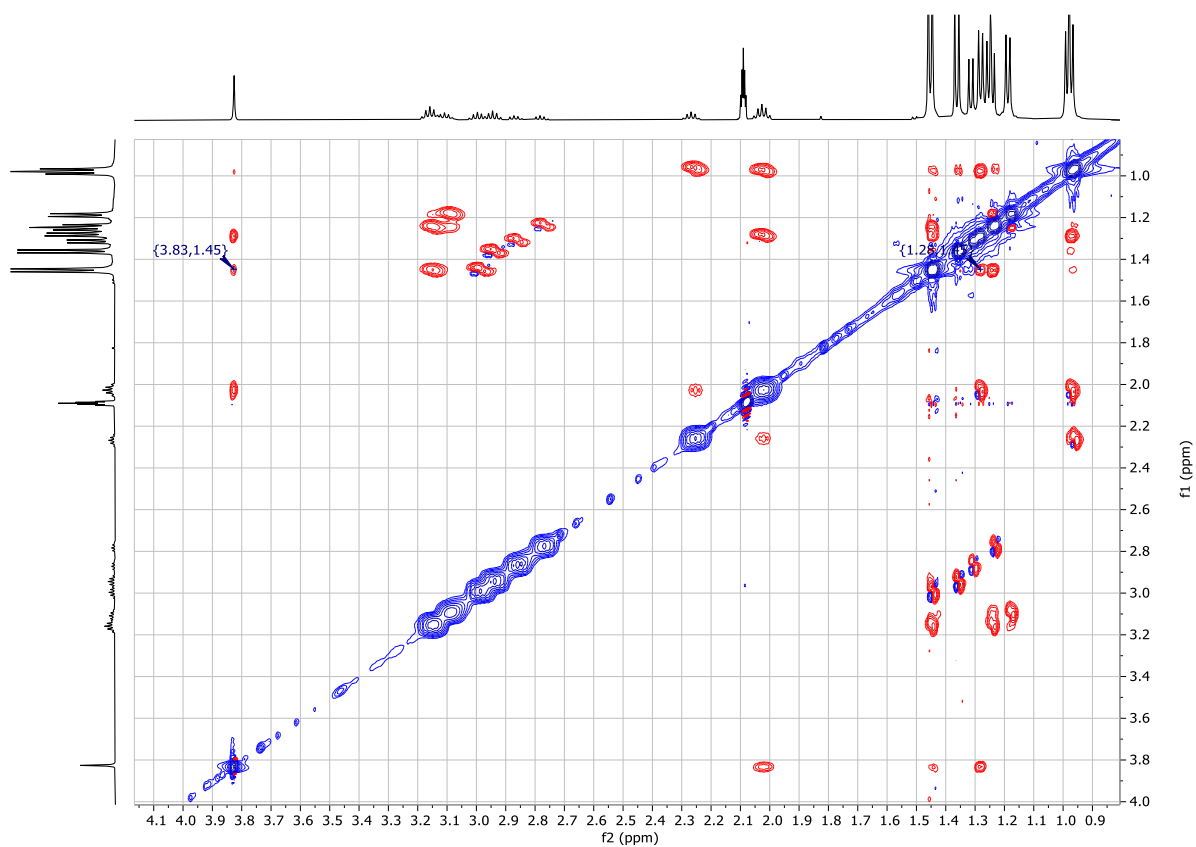

Excerpt from ROESY (toluene- $d_8$ ) of **3**

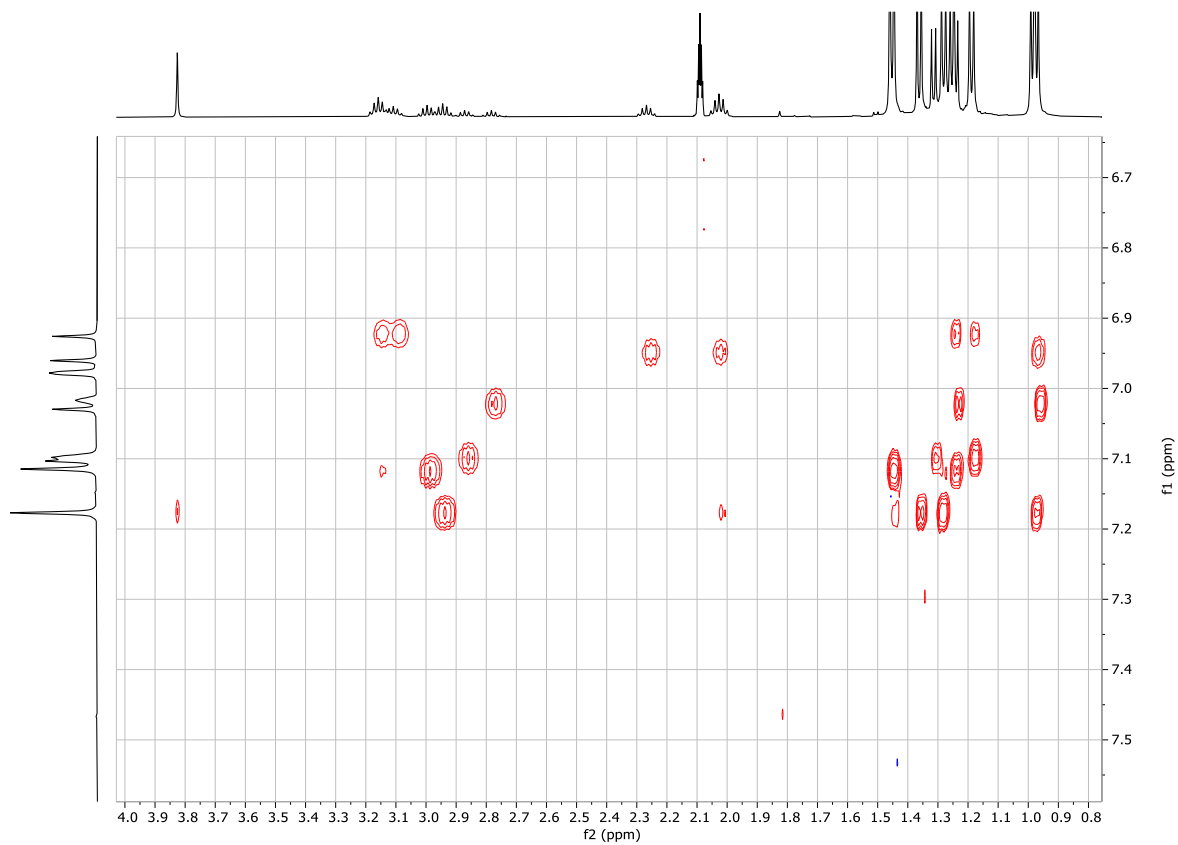

<sup>1</sup>H NMR (500 MHz, DMSO-d<sub>6</sub>) of **3**

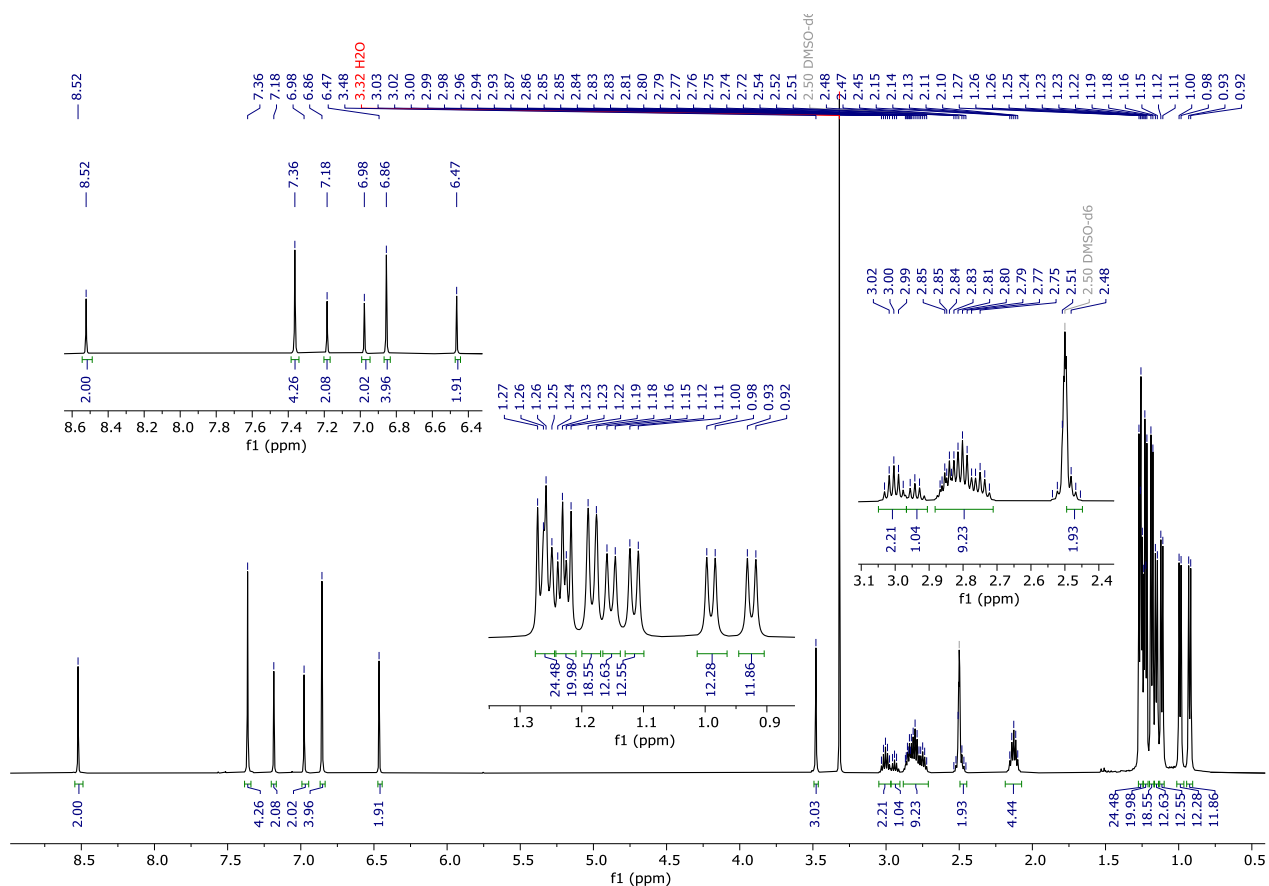

COSY (DMSO-d<sub>6</sub>) of **3**

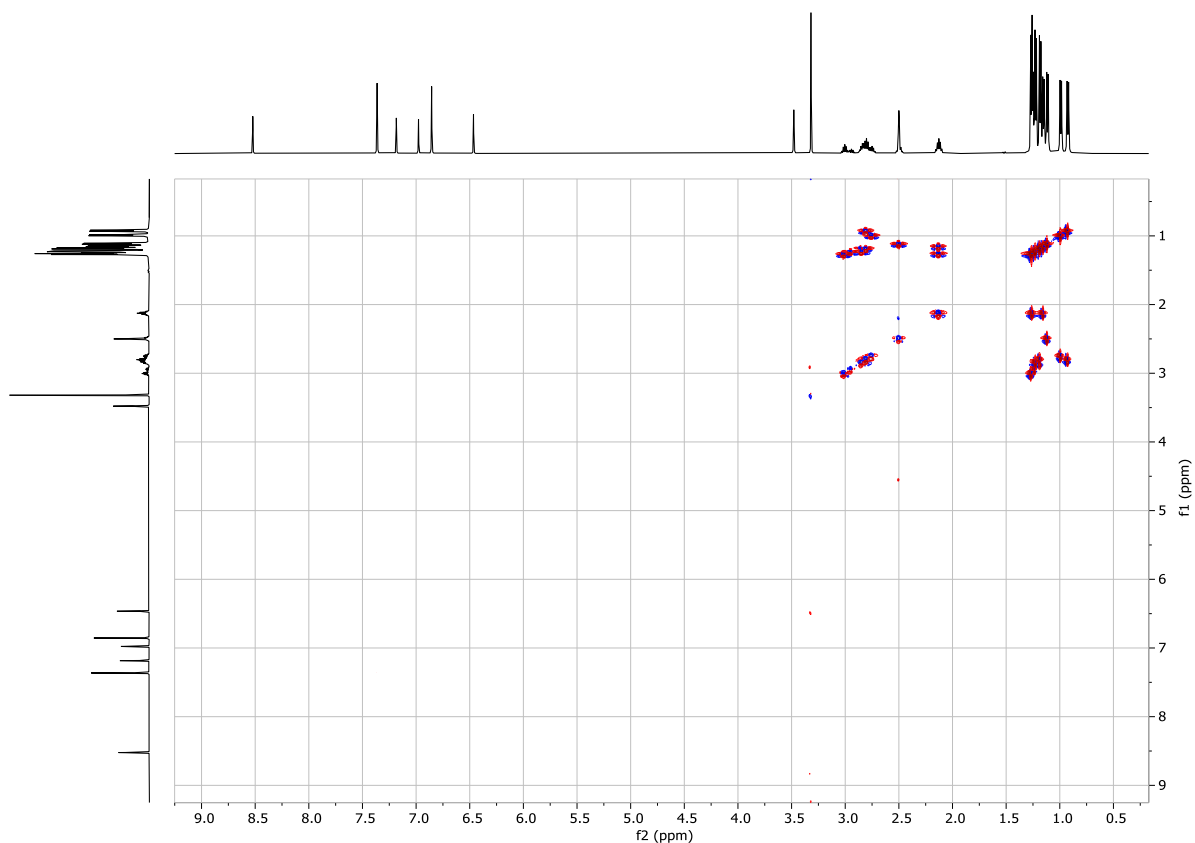

Excerpt from COSY (DMSO- $d_6$ ) of **3**

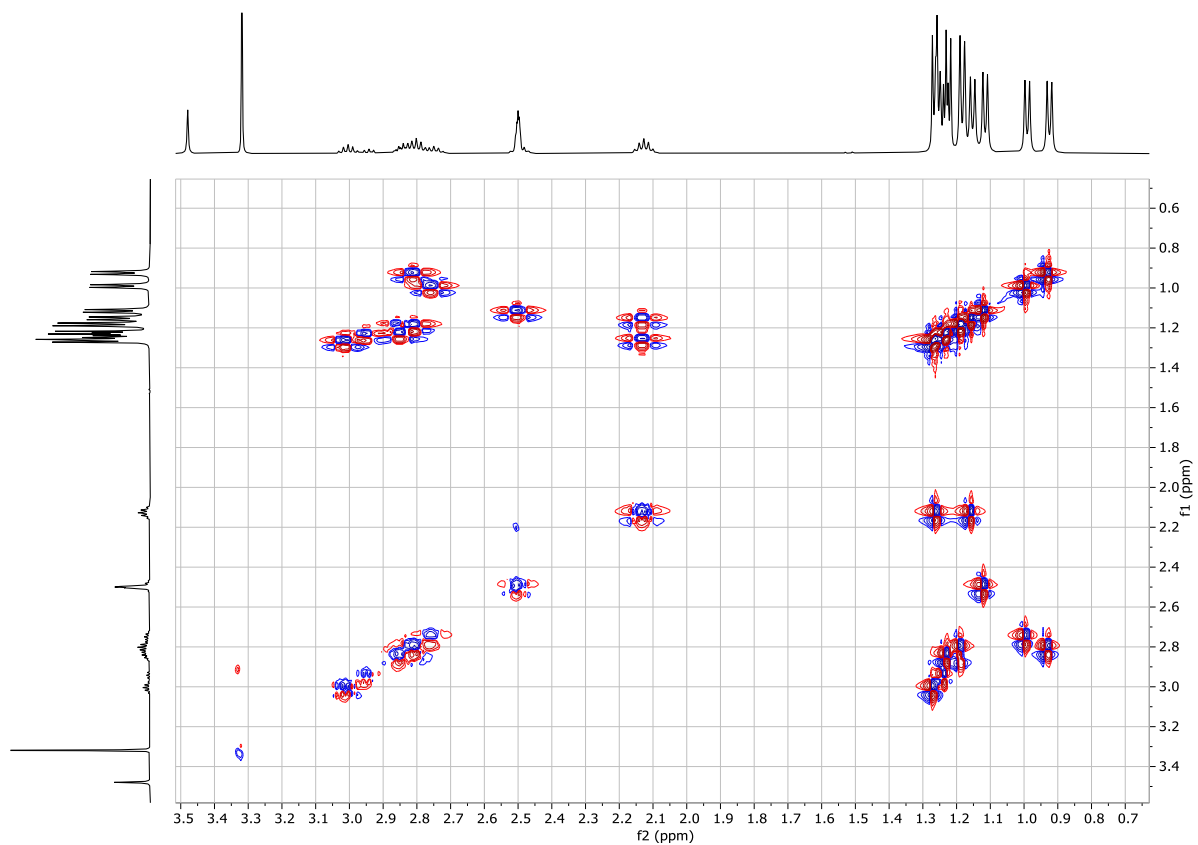

ROESY (DMSO- $d_6$ ) of **3**

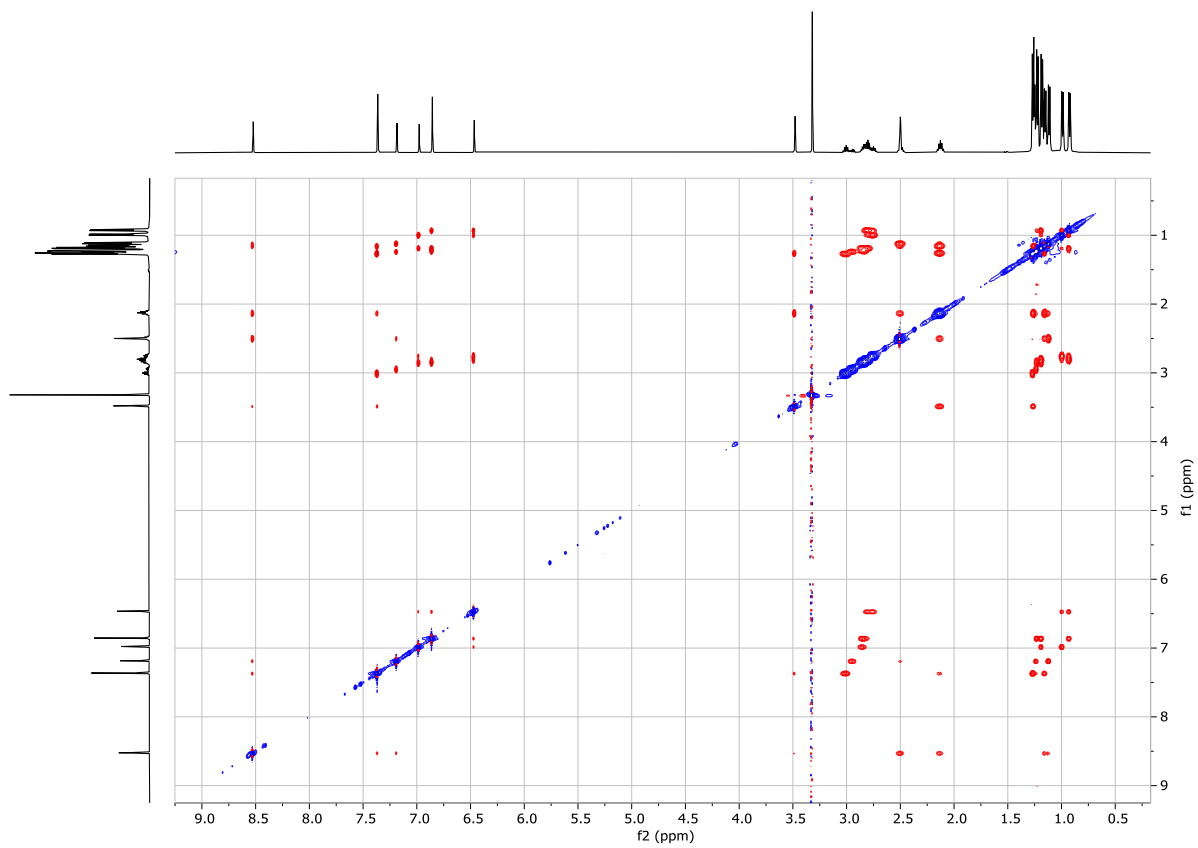



Excerpt from ROESY (DMSO- $d_6$ ) of **3**

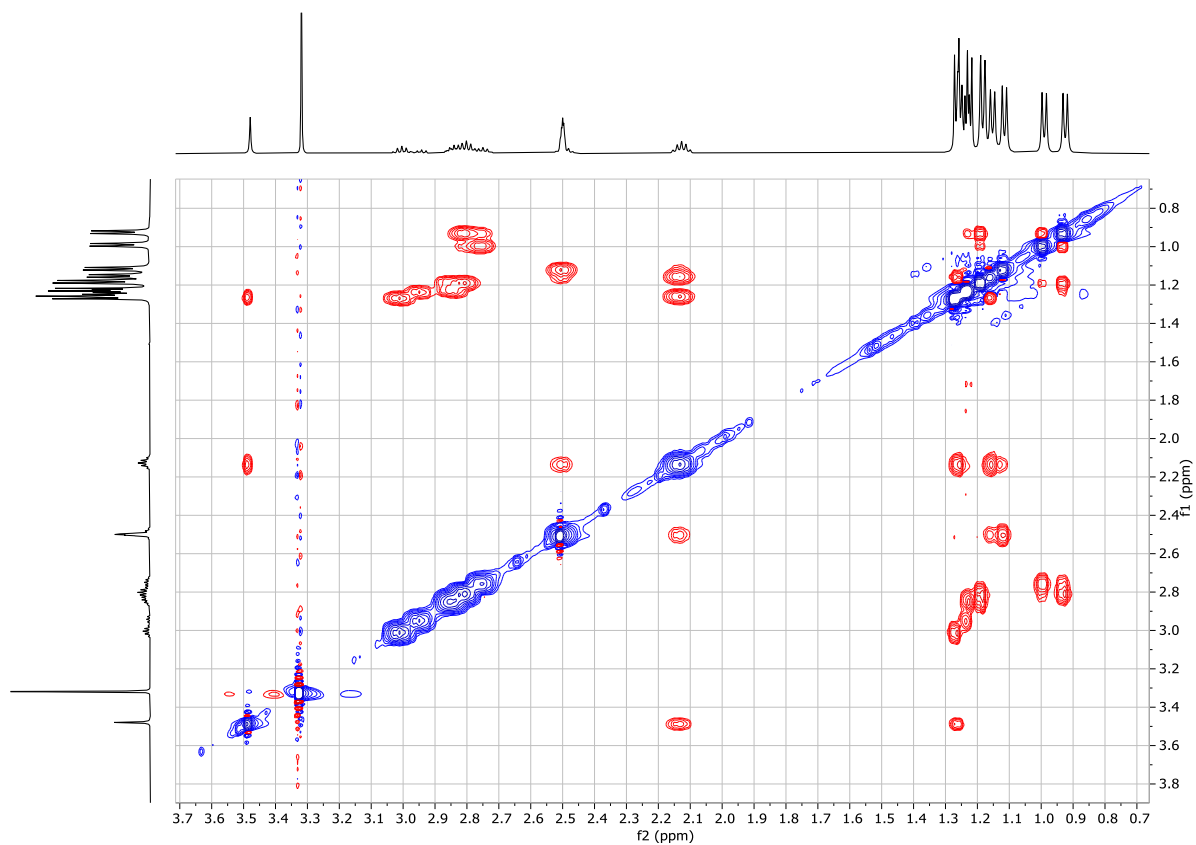

Excerpt from ROESY (DMSO- $d_6$ ) of **3**

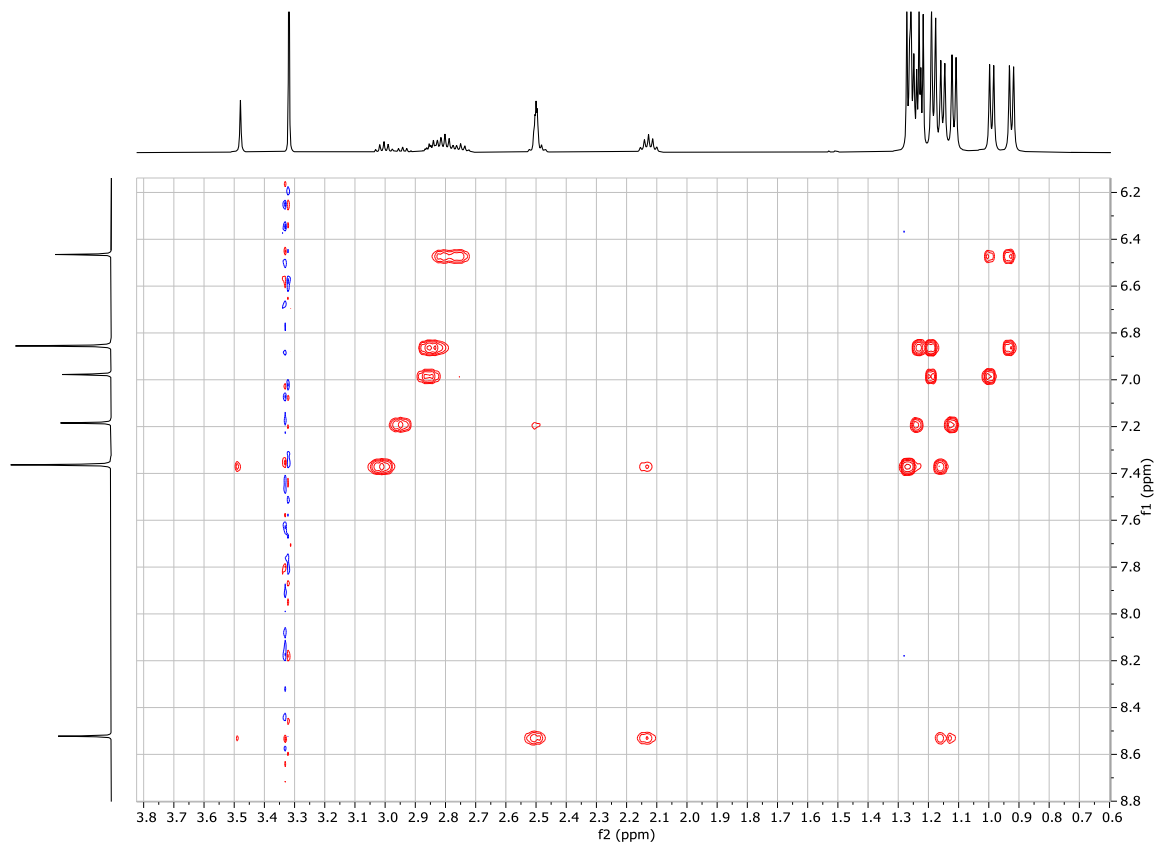

<sup>1</sup>H NMR (400 MHz, CDCl<sub>3</sub>) of **4**

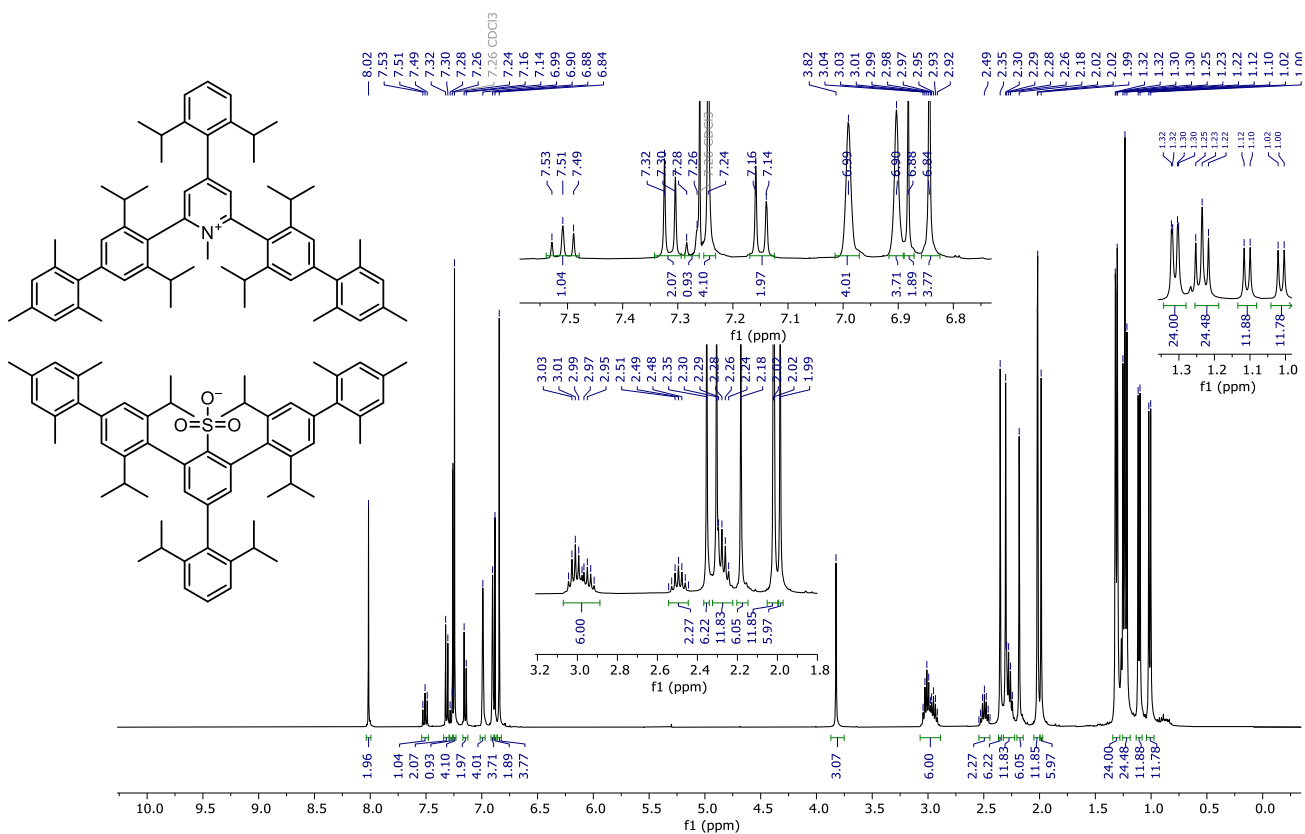

<sup>13</sup>C NMR (101 MHz, CDCl<sub>3</sub>) of **4**

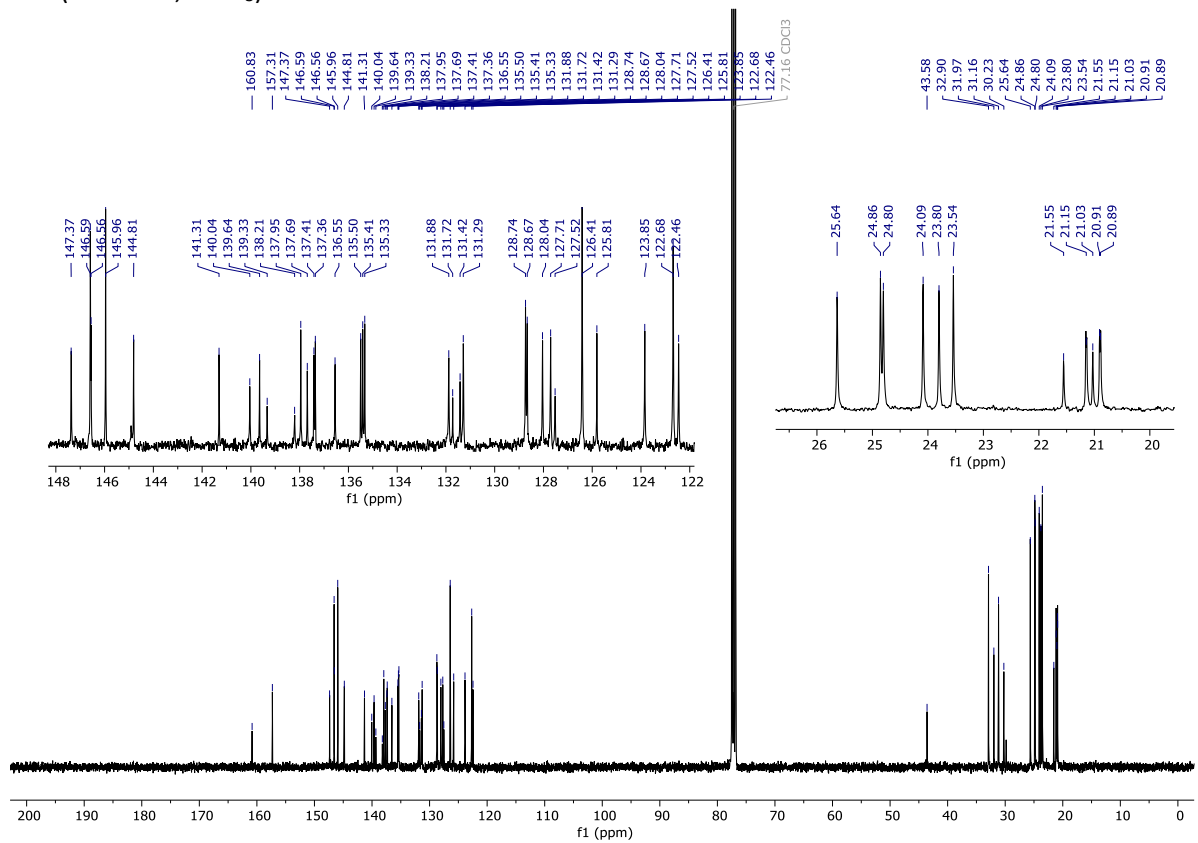

<sup>1</sup>H NMR (500 MHz, CDCl<sub>3</sub>) of **5**

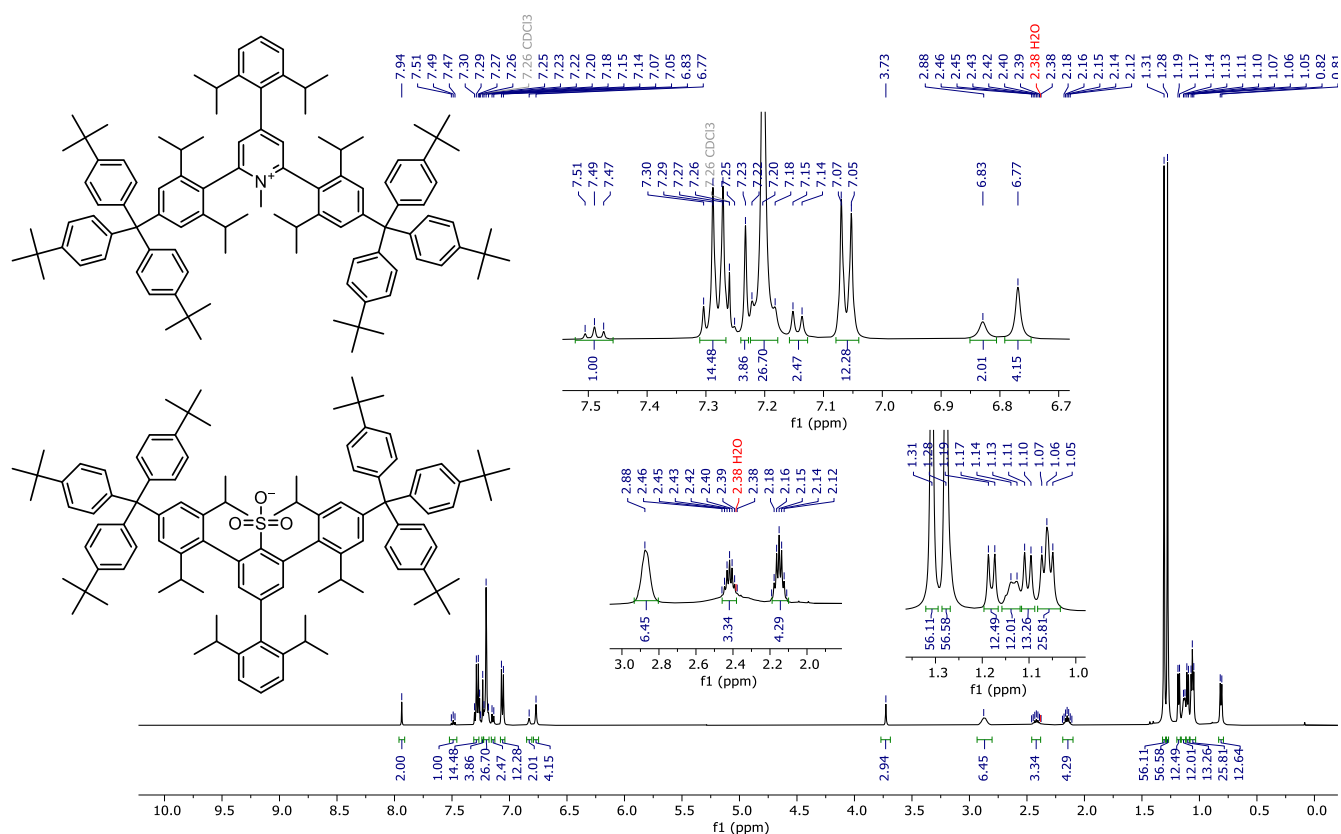

<sup>13</sup>C NMR (126 MHz, CDCl<sub>3</sub>) of **5**

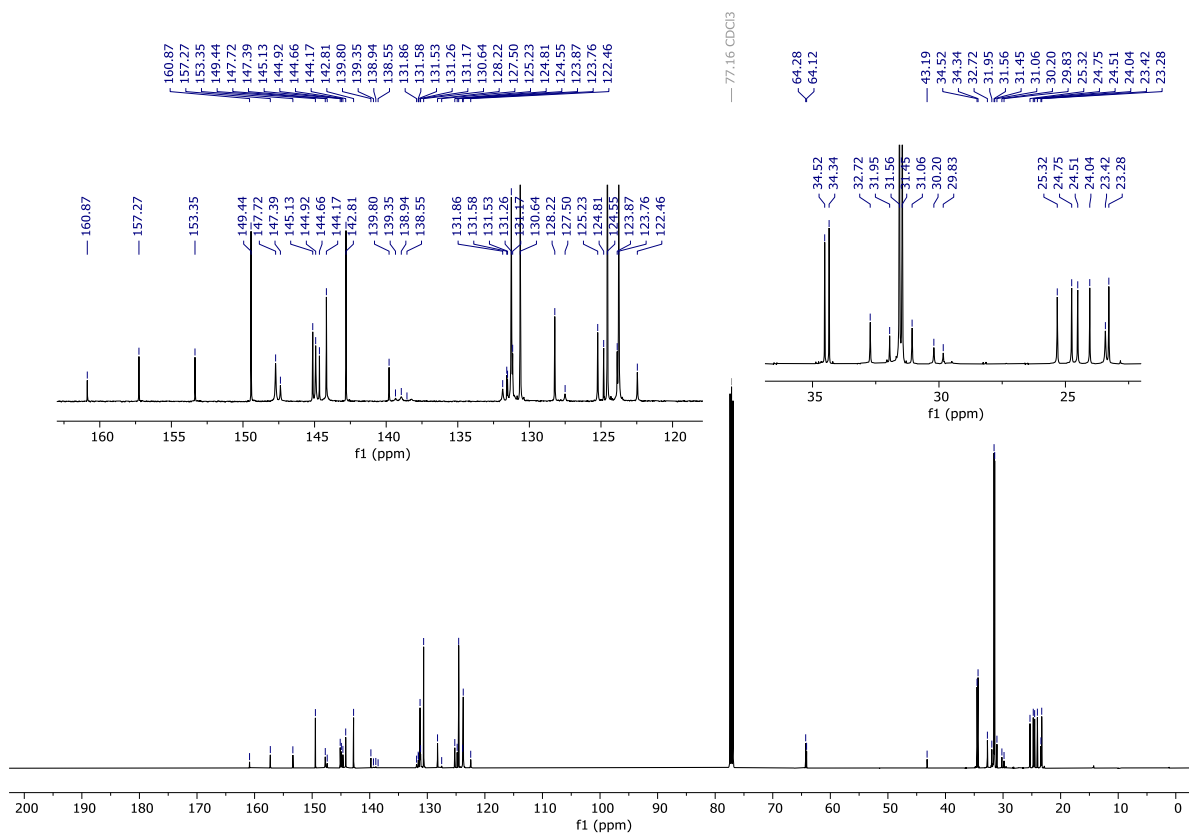

<sup>1</sup>H NMR (400 MHz, CDCl<sub>3</sub>) of **6**

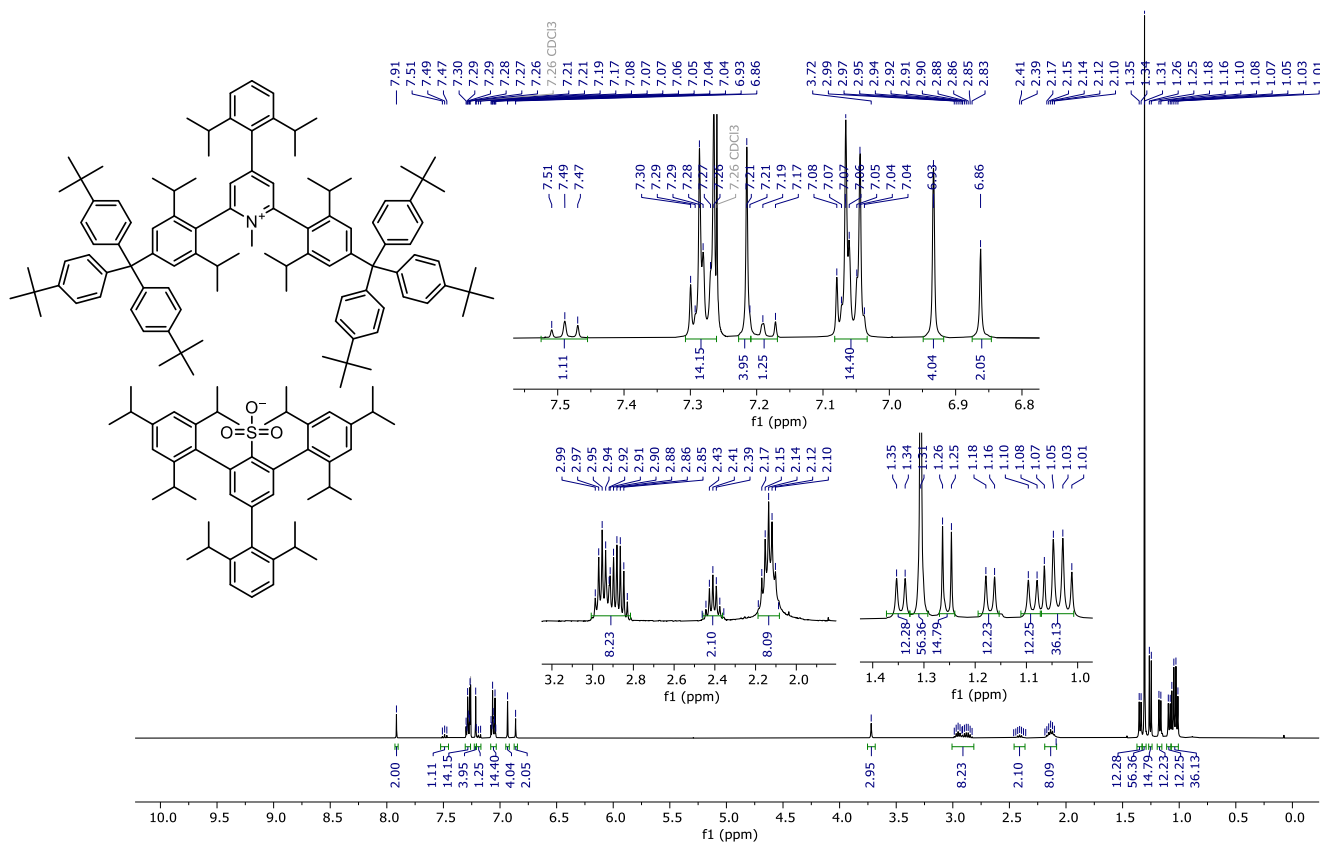

<sup>13</sup>C NMR (101 MHz, CDCl<sub>3</sub>) of **6**

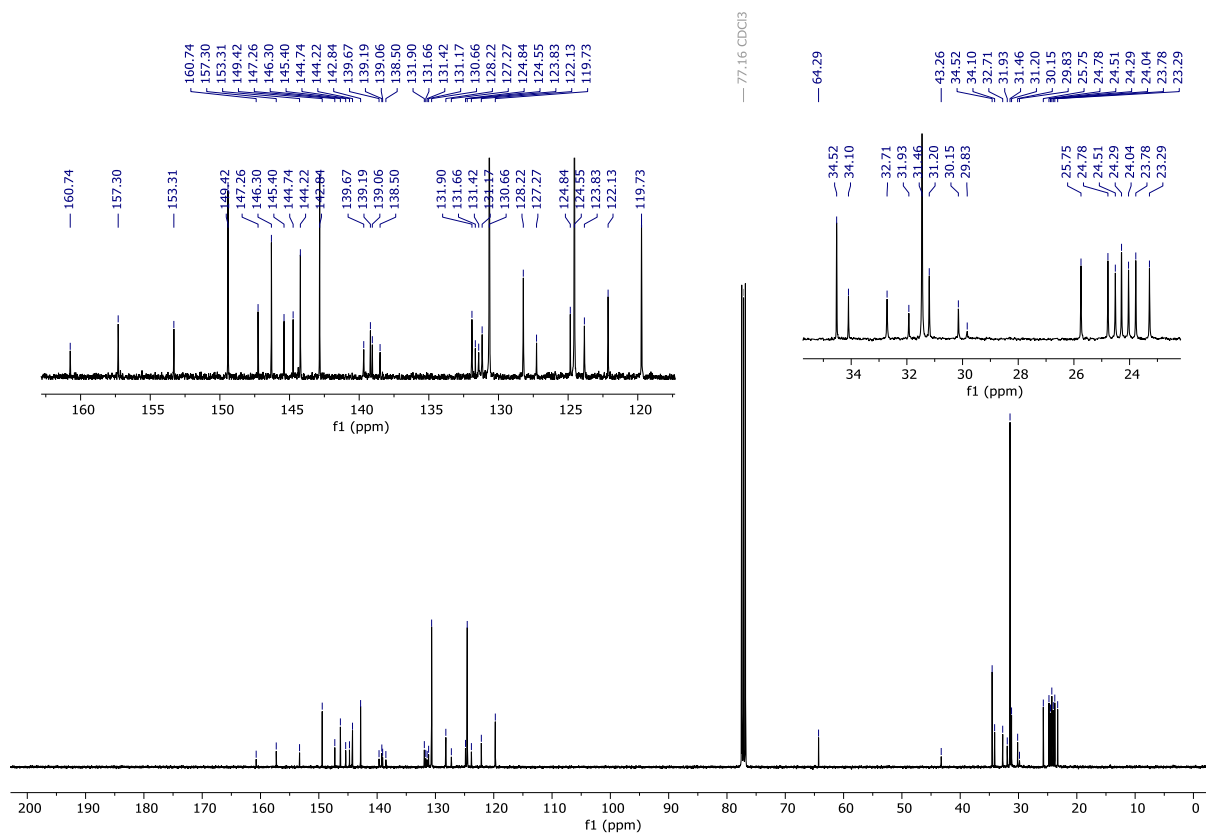

# <sup>1</sup>H NMR (500 MHz, C<sub>6</sub>D<sub>6</sub>/CDCl<sub>3</sub> 9:1) of 7

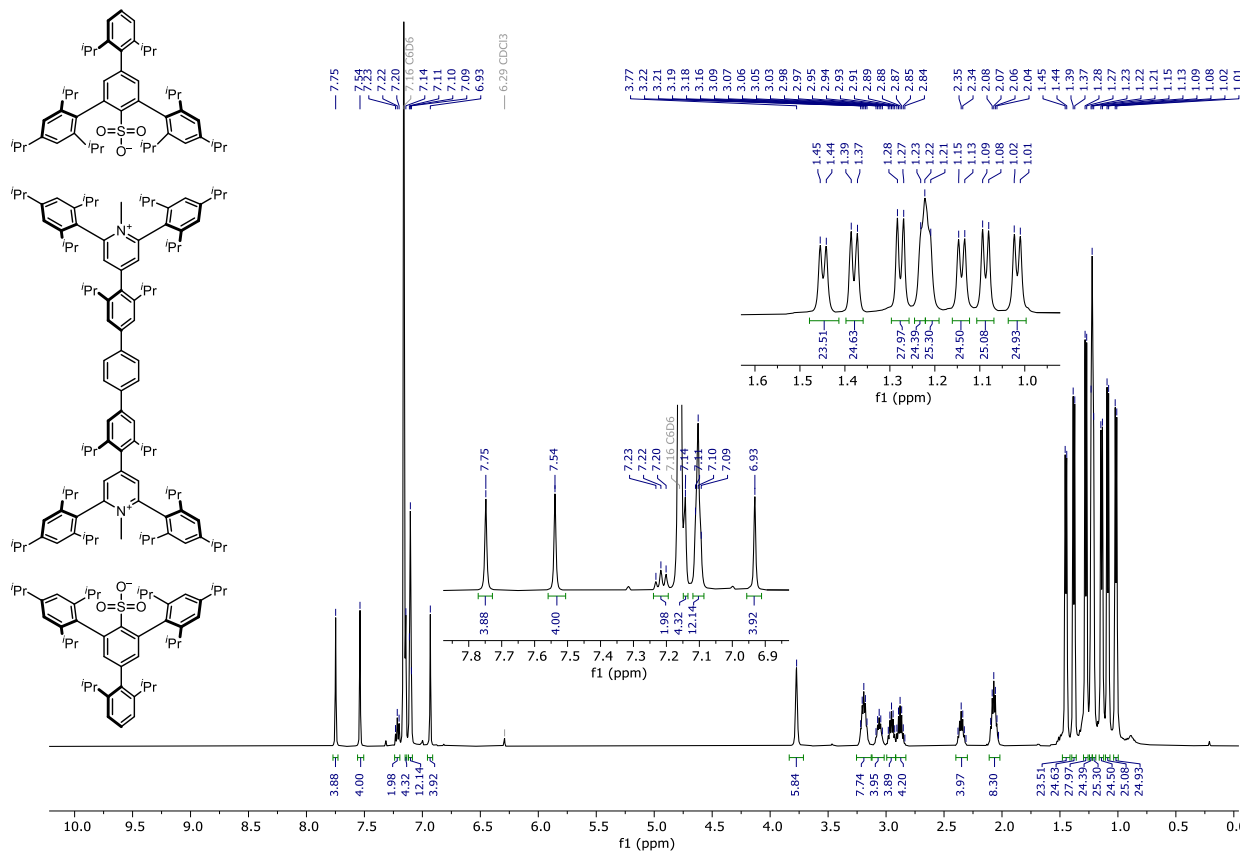

# <sup>13</sup>C NMR (126 MHz, C<sub>6</sub>D<sub>6</sub>/CDCl<sub>3</sub> 9:1) of 7

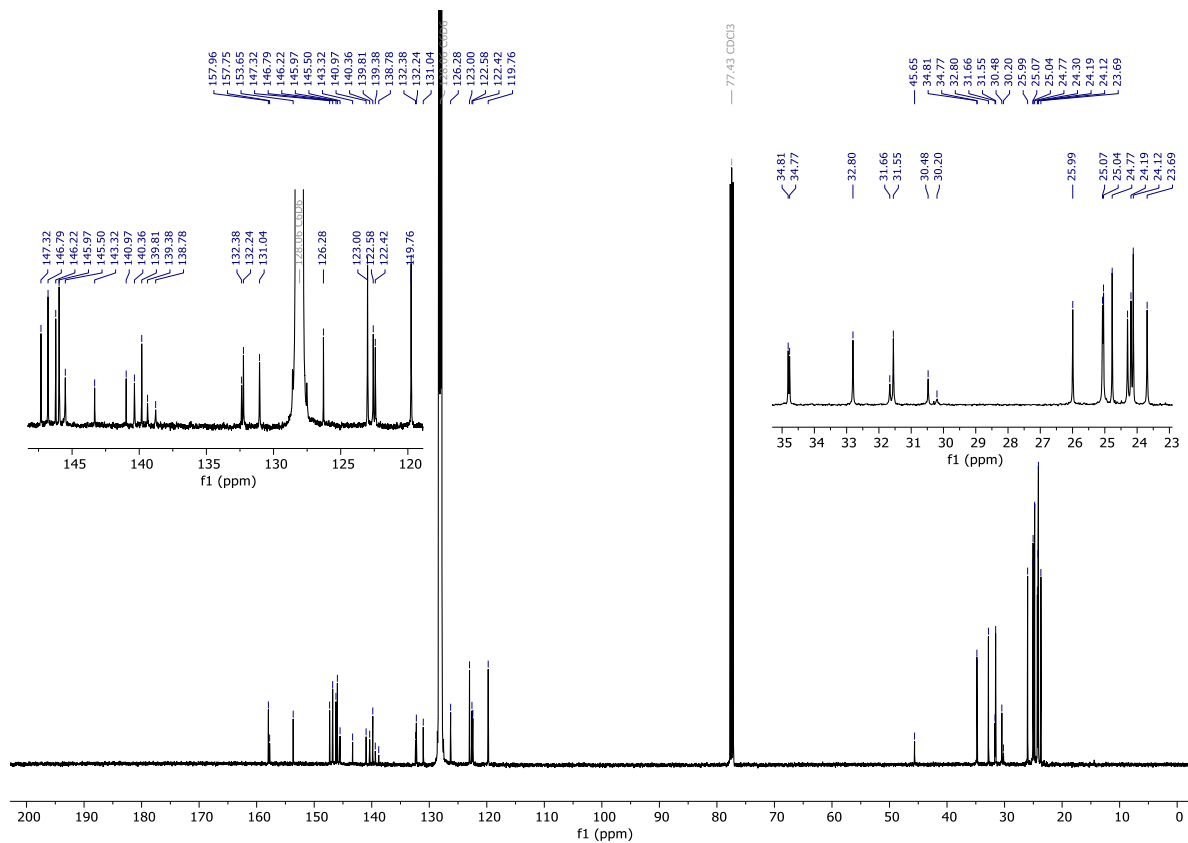

COSY ( $C_6D_6/CDCl_3$  9:1) of **7**

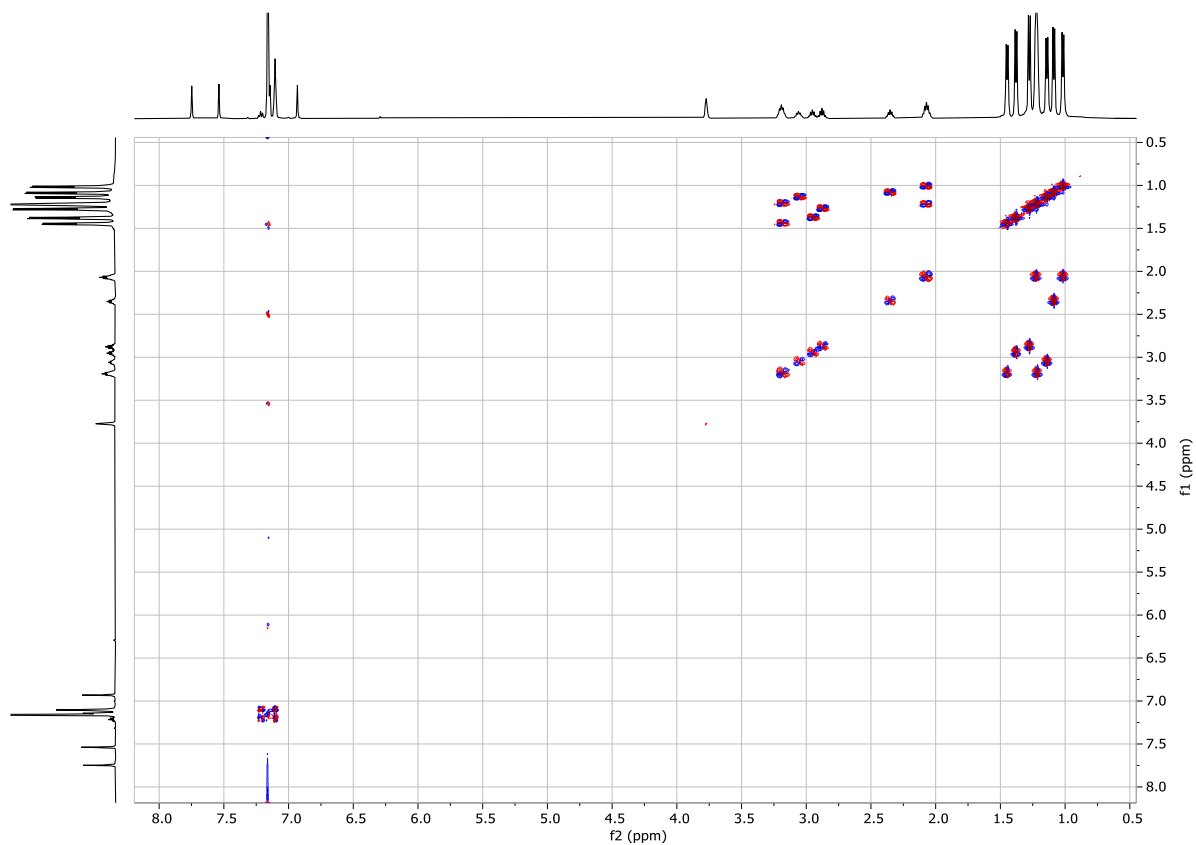

Excerpt from COSY ( $C_6D_6/CDCl_3$  9:1) of **7**

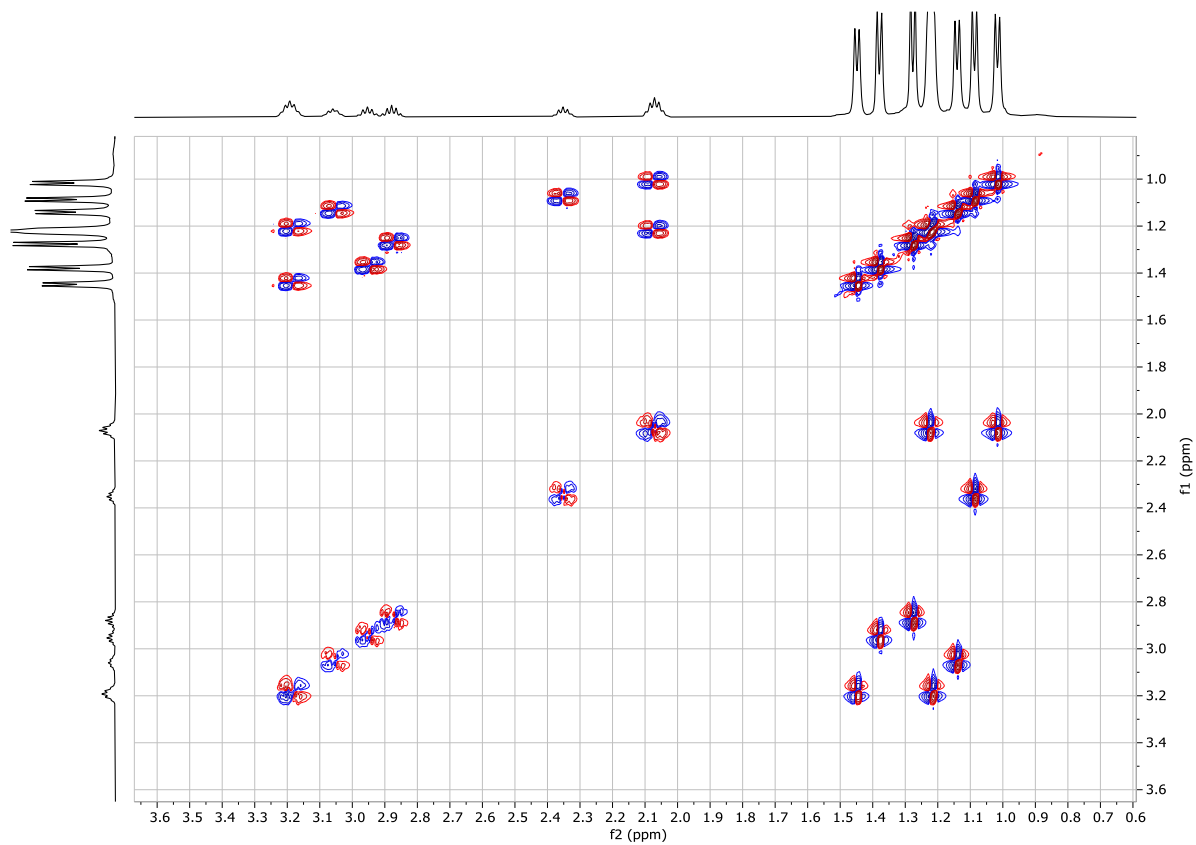

ROESY (C<sub>6</sub>D<sub>6</sub>/CDCl<sub>3</sub> 9:1) of **7**

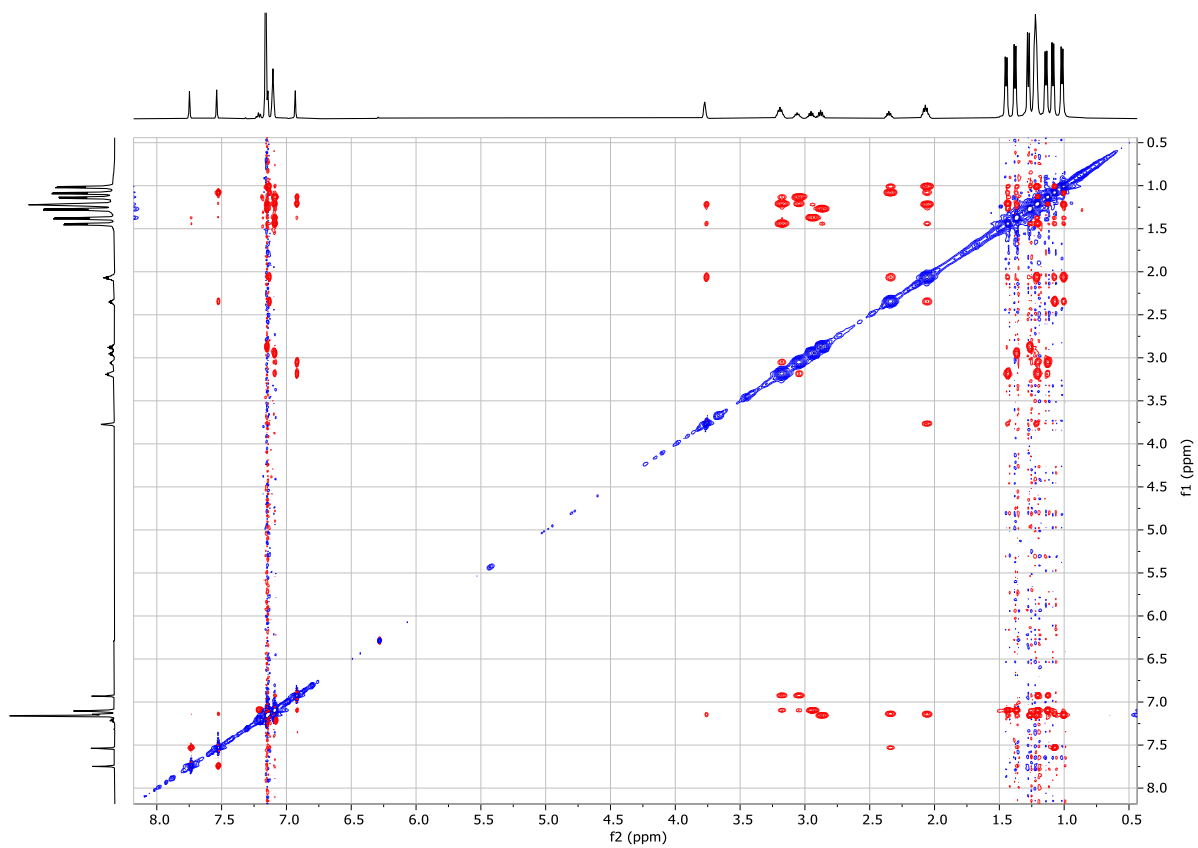

Excerpt from ROESY (C<sub>6</sub>D<sub>6</sub>/CDCl<sub>3</sub> 9:1) of **7**

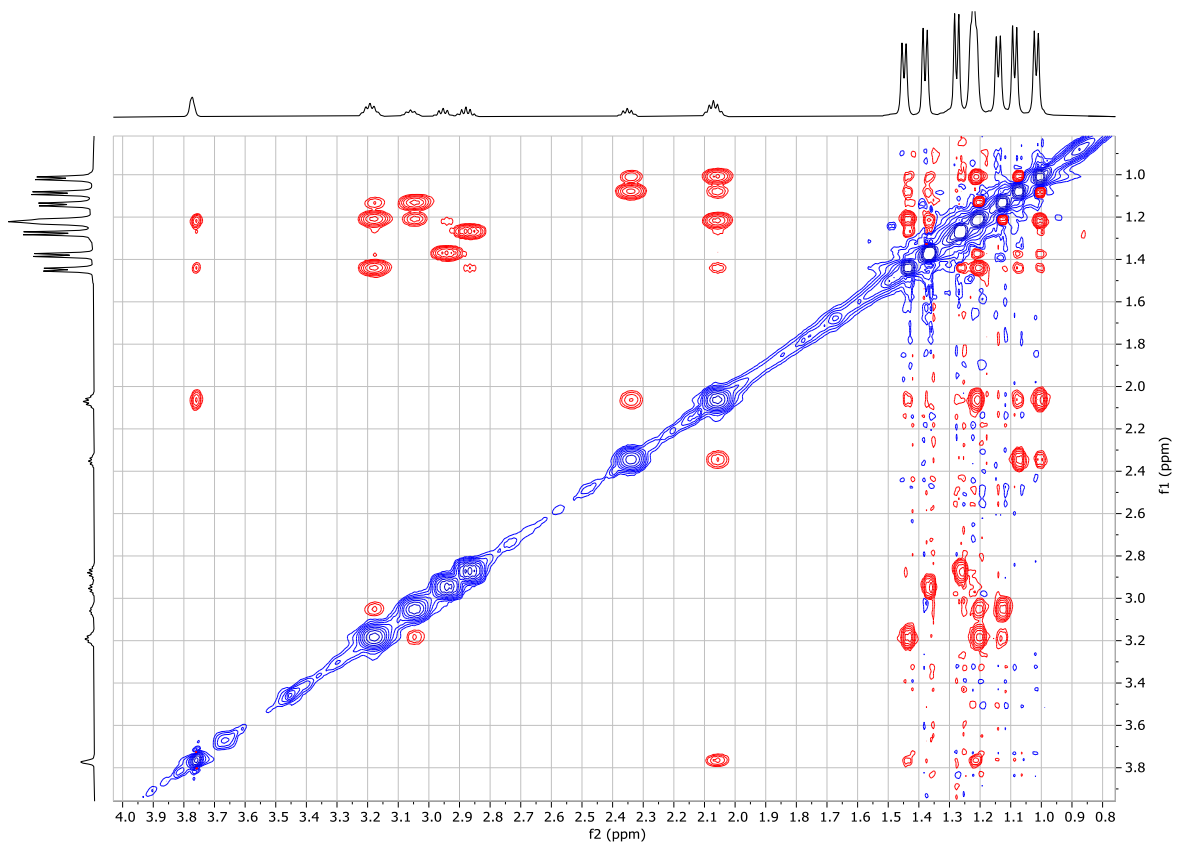

Excerpt from ROESY ( $C_6D_6/CDCl_3$  9:1) of **7**

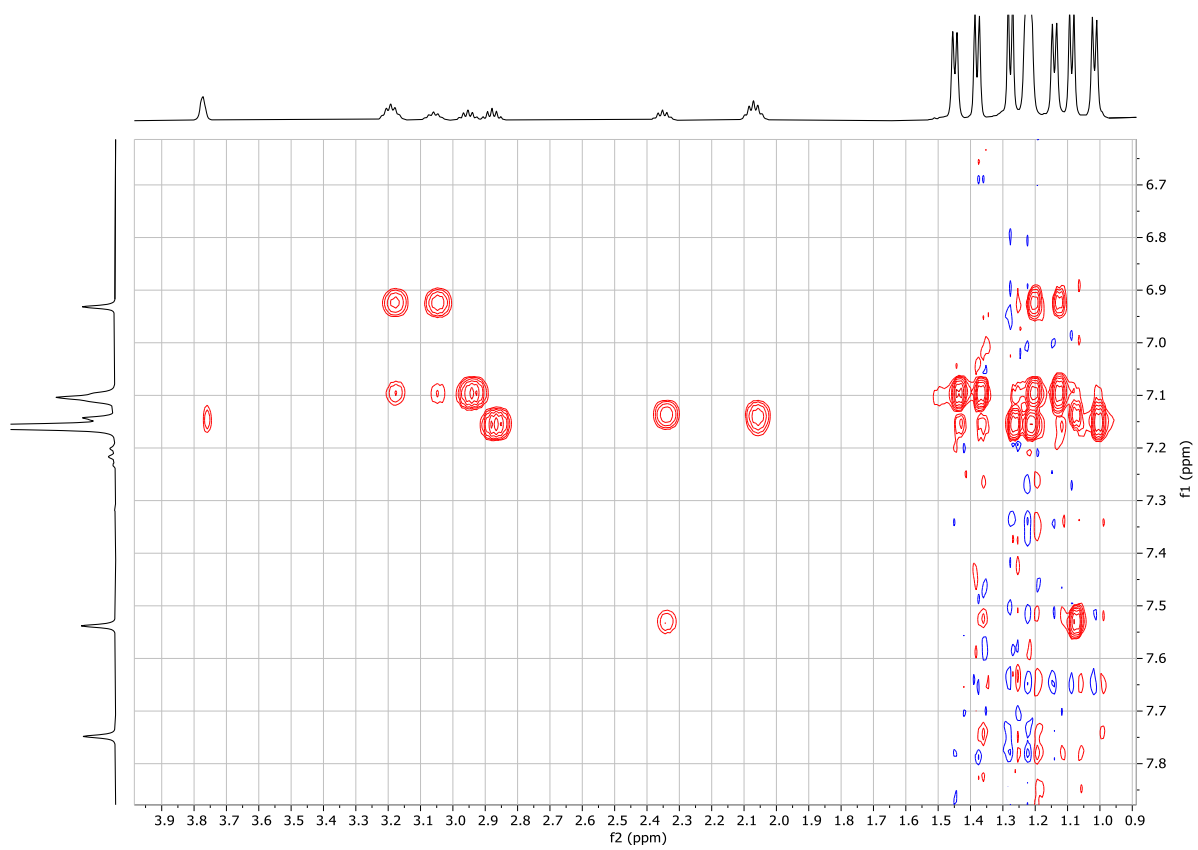



<sup>1</sup>H NMR (500 MHz, C<sub>6</sub>D<sub>6</sub>) of **8**

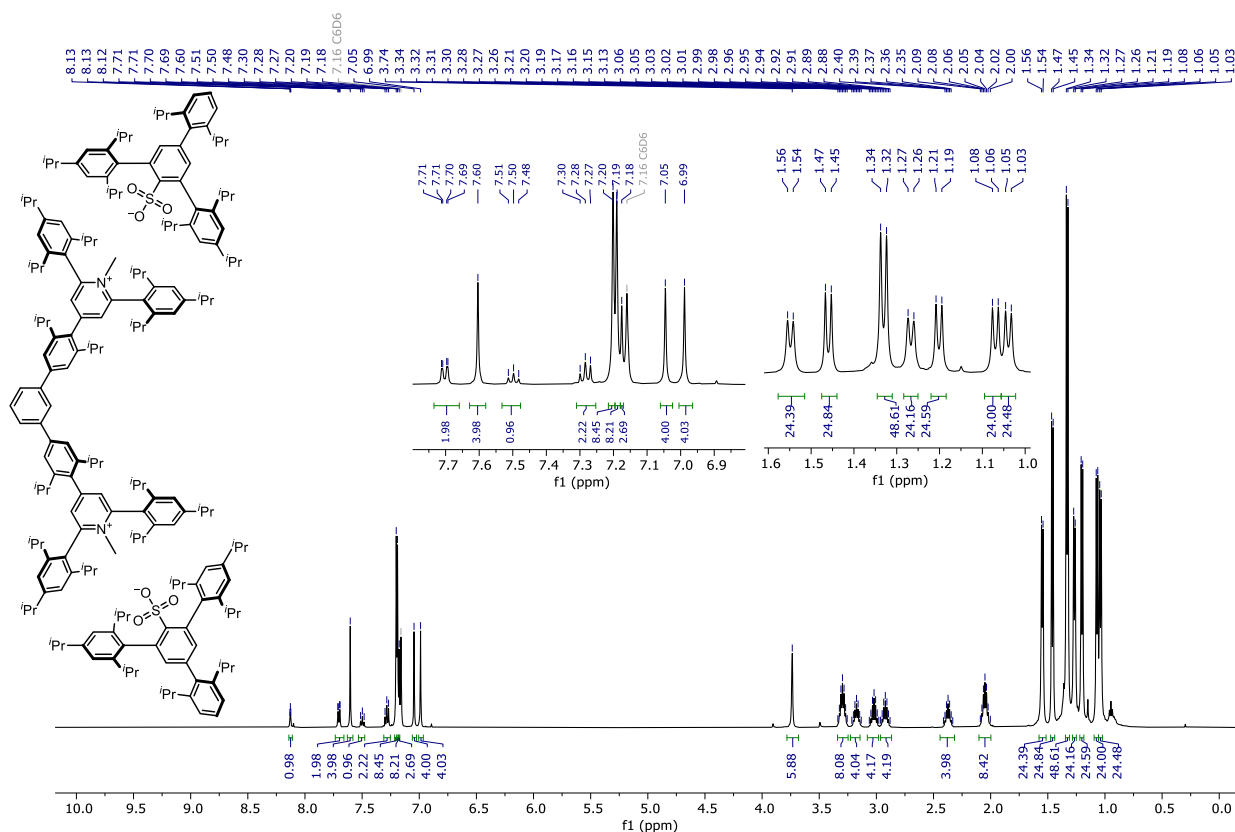

<sup>13</sup>C NMR (126 MHz, C<sub>6</sub>D<sub>6</sub>) of **8**

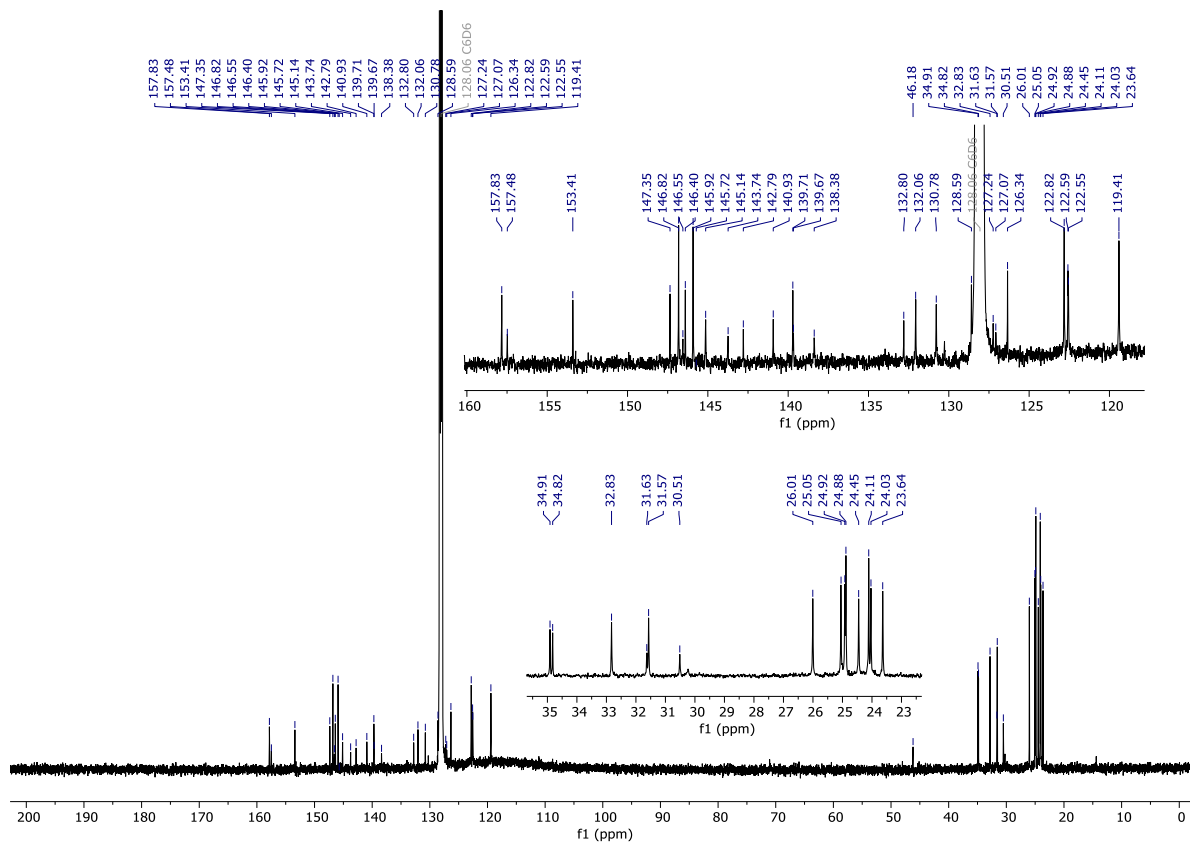

COSY ( $C_6D_6$ ) of **8**

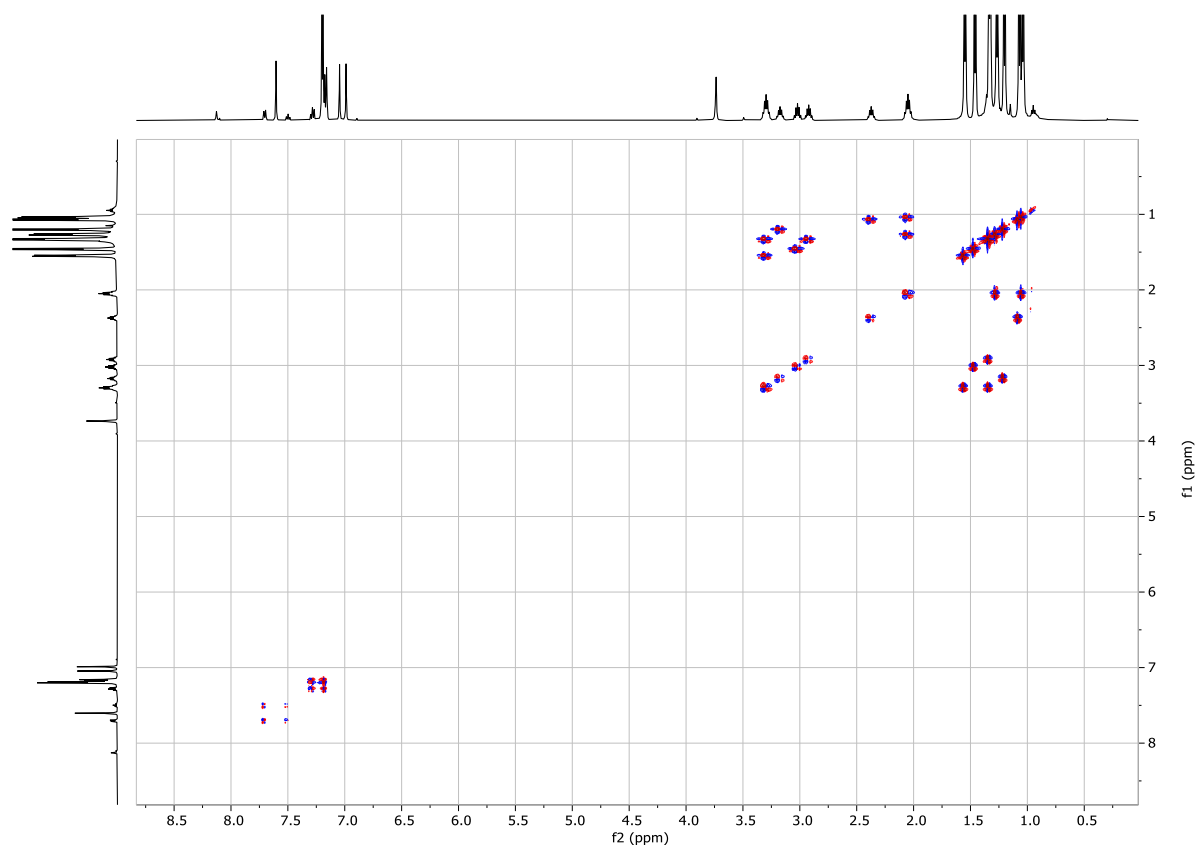

Excerpt from COSY ( $C_6D_6$ ) of **8**

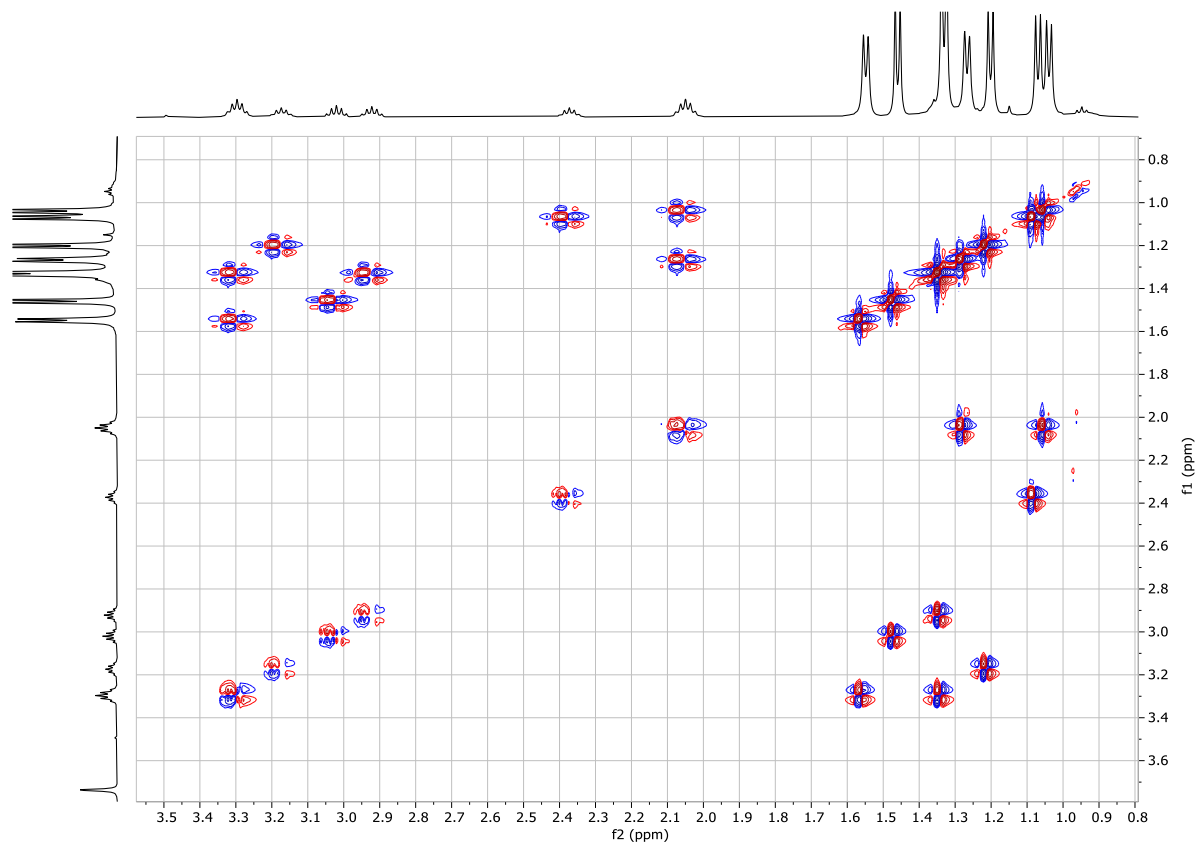

ROESY (C<sub>6</sub>D<sub>6</sub>) of **8**

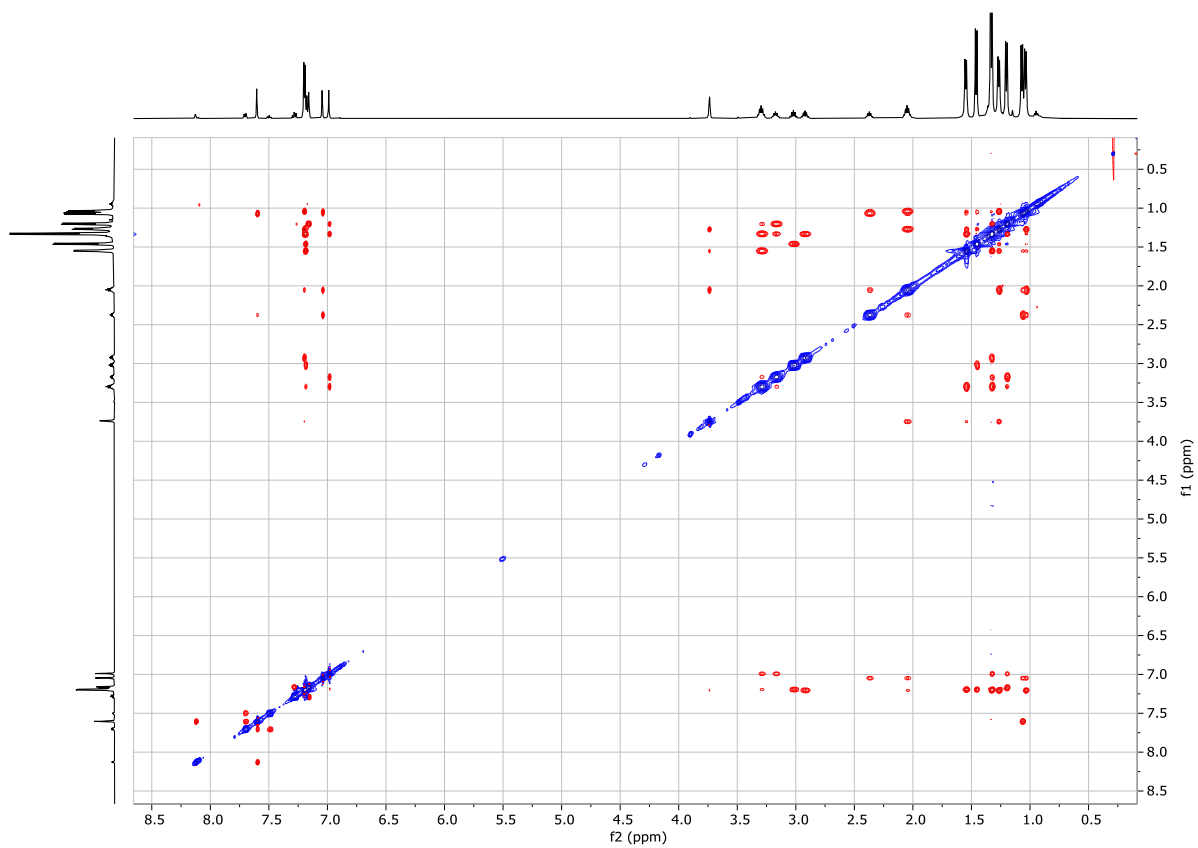

Excerpt from ROESY (C<sub>6</sub>D<sub>6</sub>) of **8**

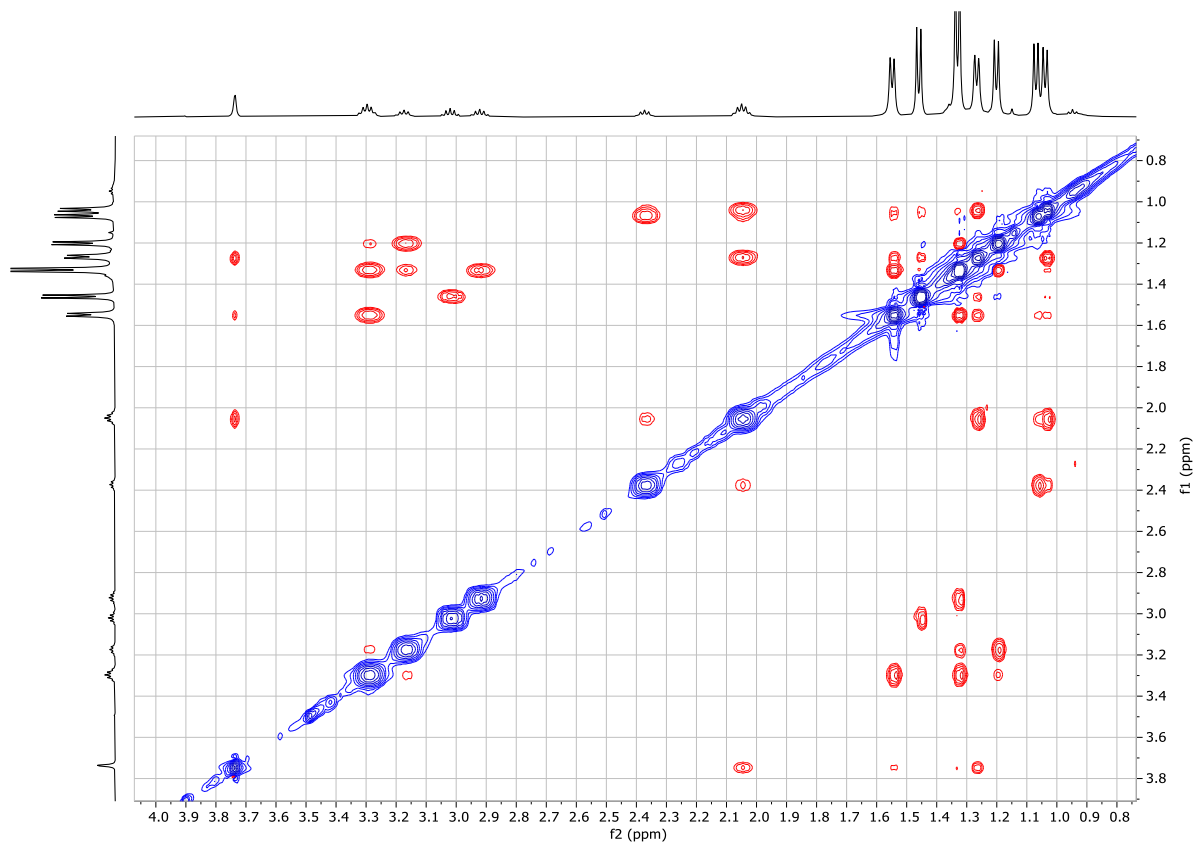

Excerpt from ROESY (C<sub>6</sub>D<sub>6</sub>) of **8**

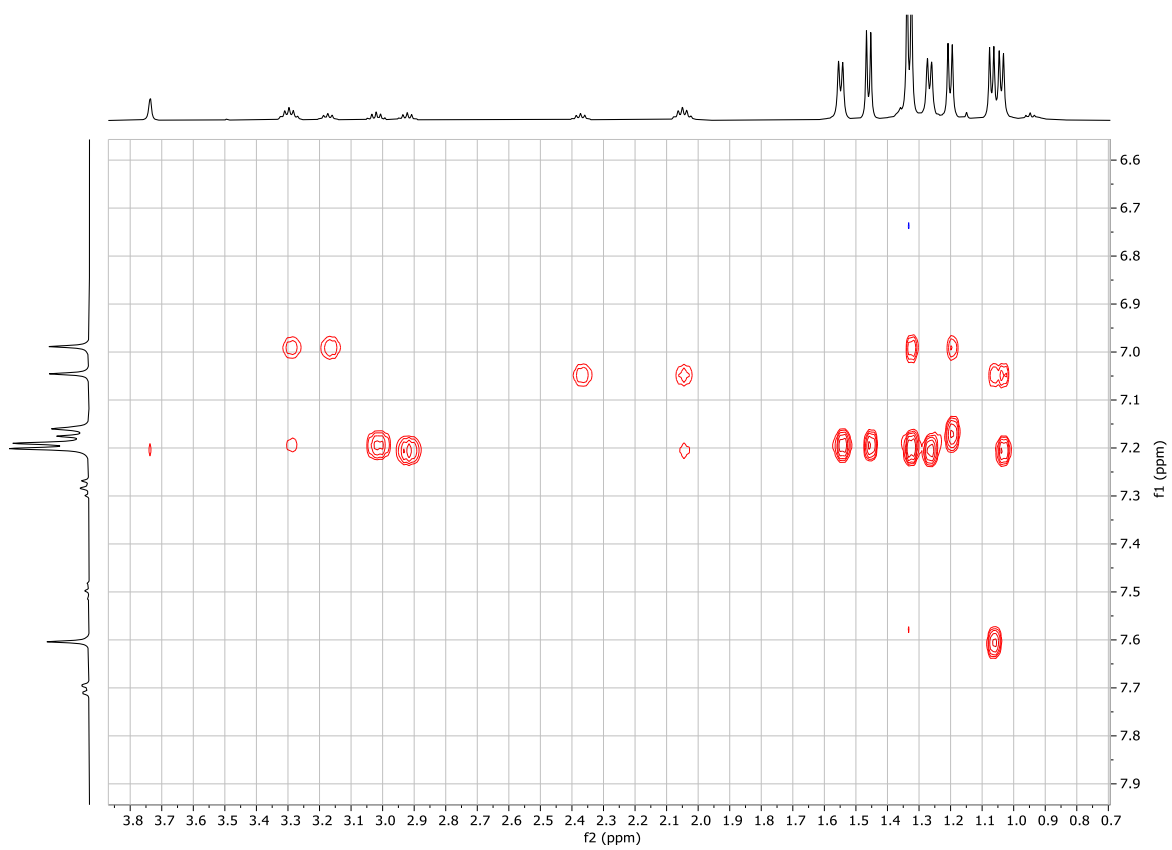

<sup>1</sup>H NMR (500 MHz, C<sub>6</sub>D<sub>6</sub>) of **9**

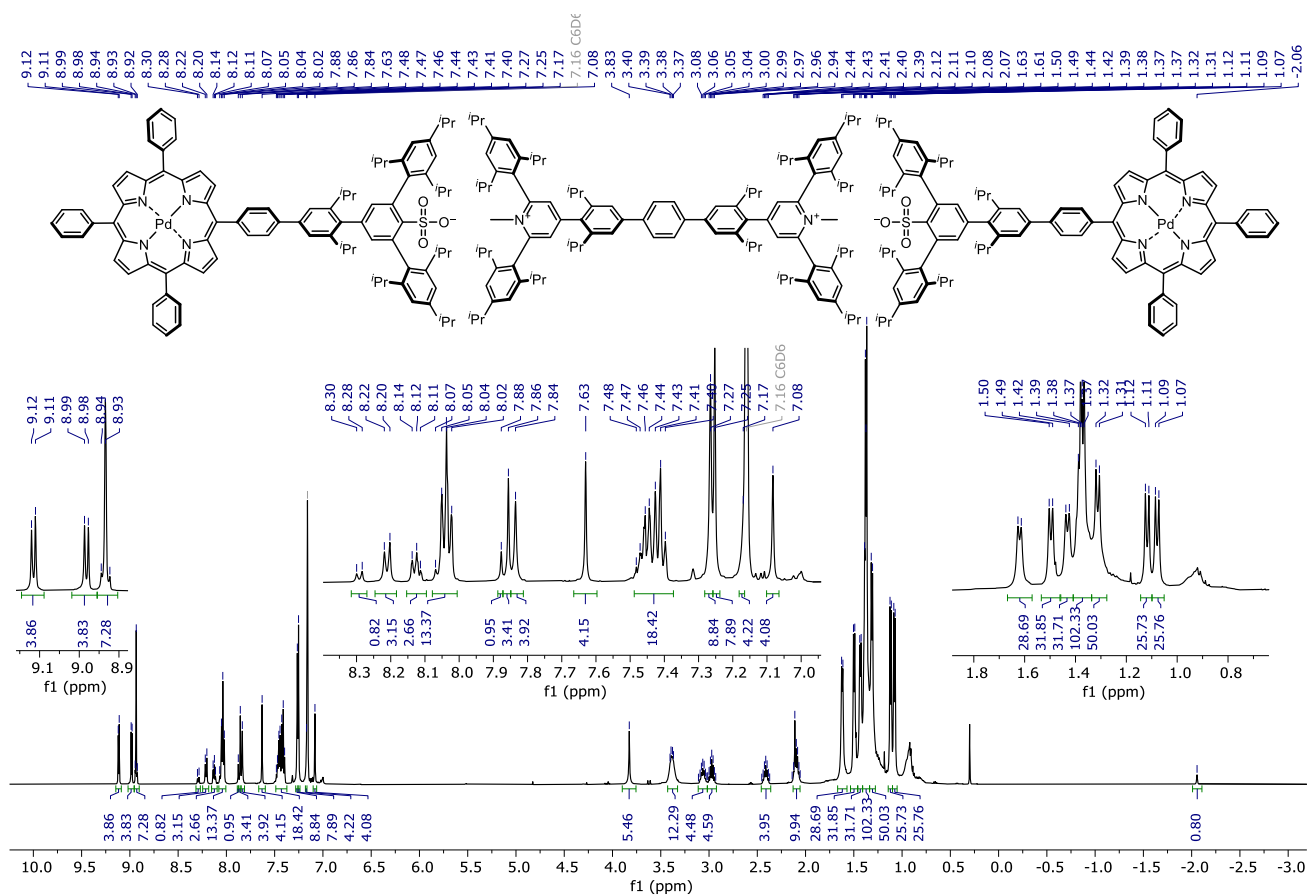

<sup>13</sup>C NMR (126 MHz, C<sub>6</sub>D<sub>6</sub>) of **9**

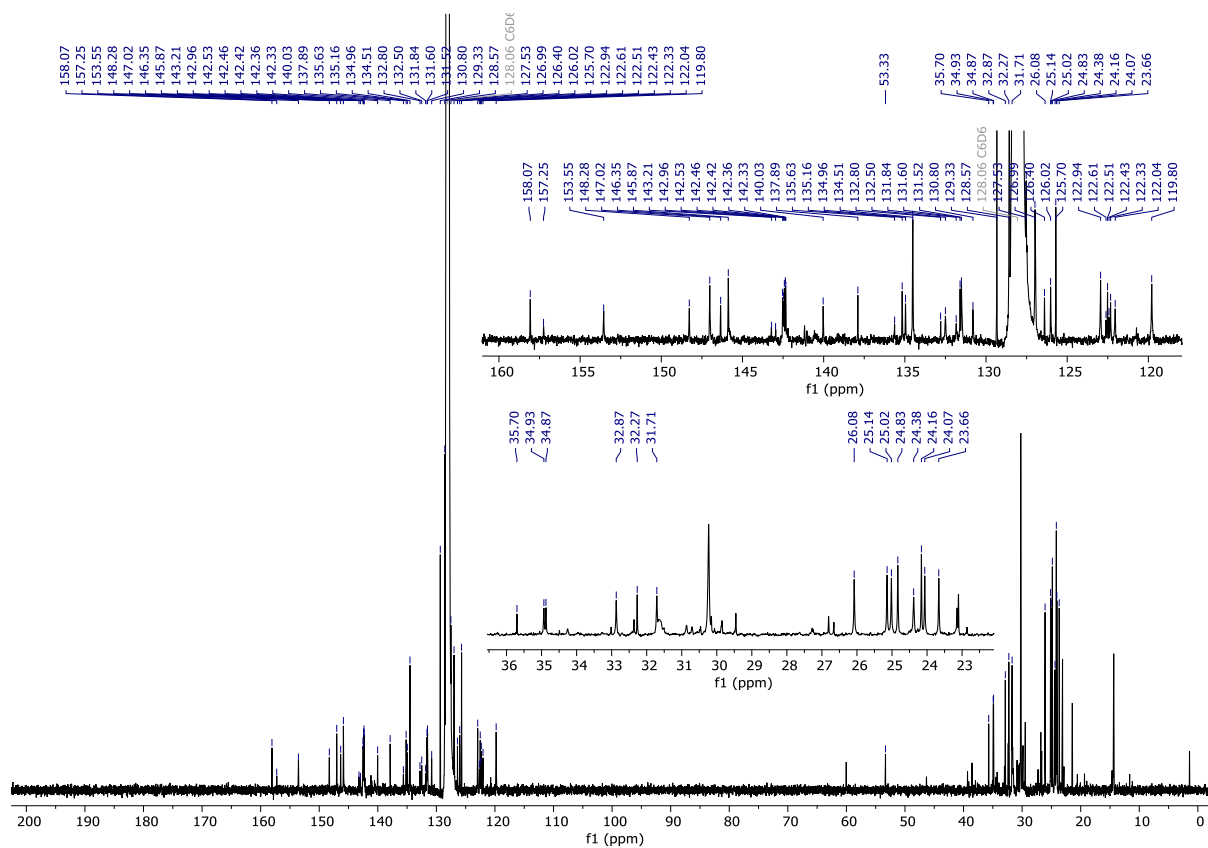

<sup>1</sup>H NMR (500 MHz, CD<sub>3</sub>OD-CDCl<sub>3</sub>) of **10**

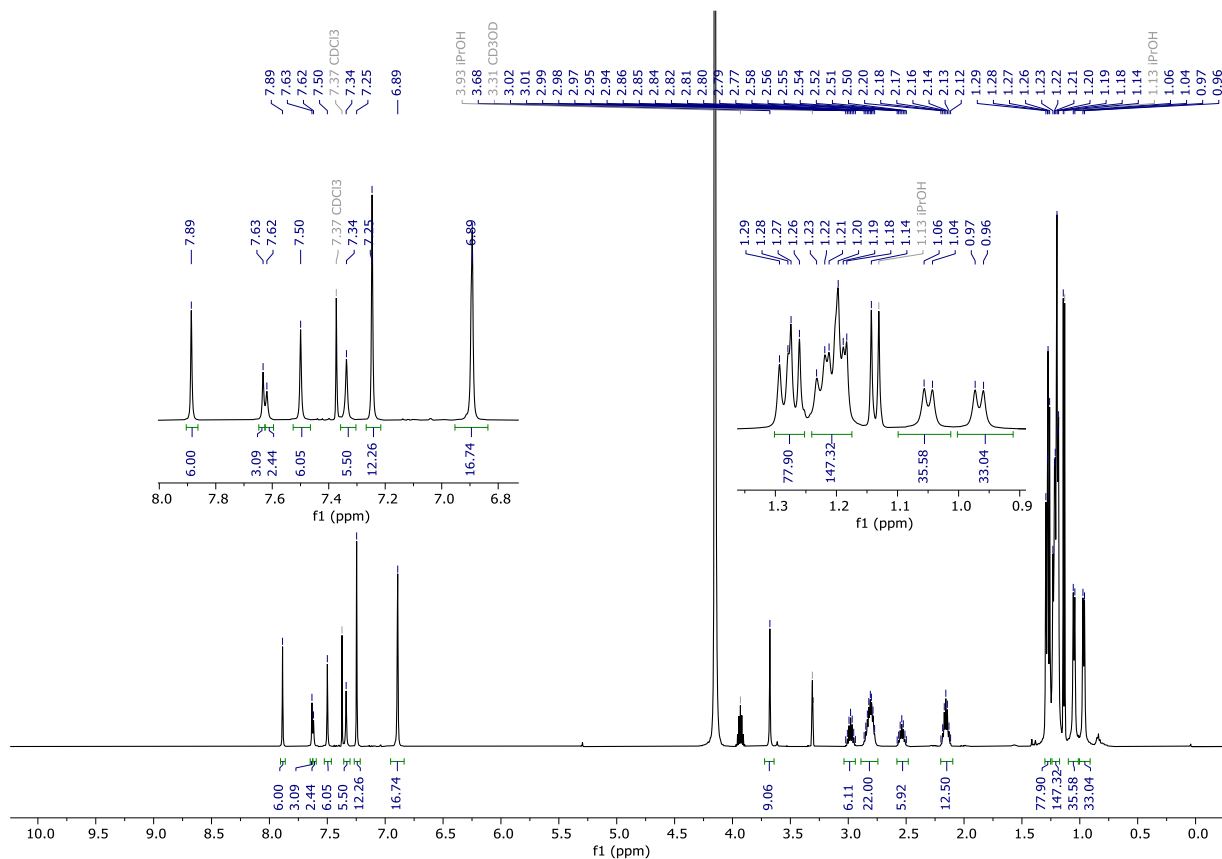

<sup>13</sup>C NMR (126 MHz, CD<sub>3</sub>OD-CDCl<sub>3</sub>) of **10**

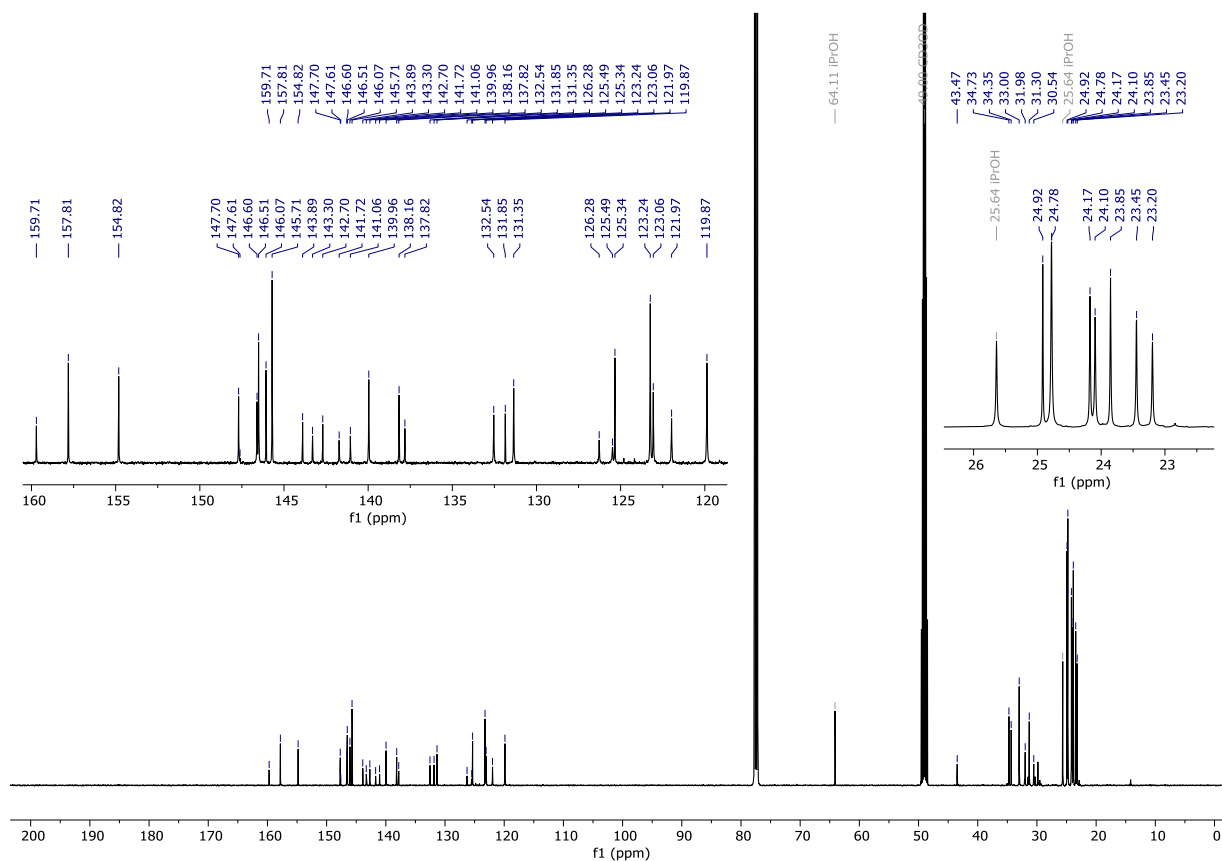

### 3.2 Cartesian coordinates of DFT and PM6 optimized structures

#### 3.2.1 Structures optimized at the M06-2X/6-31+G(d,p) level of theory

C1<sup>+</sup>

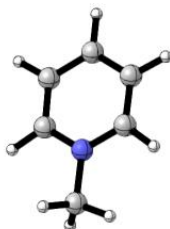

|   |            |            |            |
|---|------------|------------|------------|
| C | -6.3439050 | 1.3676860  | 0.0000000  |
| C | -7.4919100 | 0.5795590  | 0.0000000  |
| C | -7.3642430 | -0.7983170 | 0.0000000  |
| N | -6.1457410 | -1.3752080 | 0.0000000  |
| C | -5.0211830 | -0.6270510 | 0.0000000  |
| C | -5.0918970 | 0.7522390  | 0.0000000  |
| C | -6.0150530 | -2.8498230 | 0.0000000  |
| H | -7.0085210 | -3.2928030 | 0.0000000  |
| H | -5.4743720 | -3.1566500 | 0.8956160  |
| H | -5.4743720 | -3.1566500 | -0.8956160 |
| H | -8.2159600 | -1.4680330 | 0.0000000  |
| H | -6.4221380 | 2.4497300  | 0.0000000  |
| H | -8.4830240 | 1.0169810  | 0.0000000  |
| H | -4.0839510 | -1.1726680 | 0.0000000  |
| H | -4.1745060 | 1.3284920  | 0.0000000  |

A1<sup>-</sup>

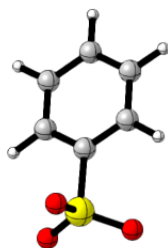

|   |            |            |            |
|---|------------|------------|------------|
| C | -4.7216190 | 2.4671030  | 0.1780940  |
| C | -5.9045810 | 1.7314480  | 0.0935120  |
| C | -5.8585710 | 0.3447070  | -0.0466120 |
| C | -4.6280510 | -0.3054260 | -0.1024810 |
| C | -3.4439730 | 0.4239030  | -0.0235380 |
| C | -3.4915500 | 1.8105090  | 0.1165690  |
| S | -4.5675460 | -2.1141130 | -0.2088500 |
| O | -5.7951400 | -2.4708000 | -0.9504310 |
| O | -3.3062030 | -2.3888080 | -0.9283170 |
| O | -4.5656190 | -2.5528030 | 1.2026120  |
| H | -2.5013430 | -0.1112750 | -0.0899660 |
| H | -2.5683520 | 2.3815300  | 0.1740250  |
| H | -4.7580560 | 3.5481020  | 0.2850890  |
| H | -6.8641520 | 2.2406910  | 0.1329680  |
| H | -6.7627080 | -0.2509900 | -0.1306530 |



C2<sup>+</sup>

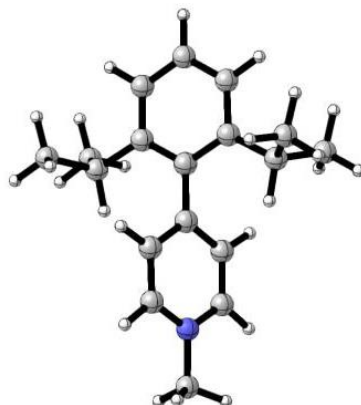

|   |            |            |            |   |            |            |            |
|---|------------|------------|------------|---|------------|------------|------------|
| N | 4.8644450  | 20.3881630 | 18.0126840 | C | 7.5842850  | 19.2422190 | 22.1840270 |
| C | 3.7712730  | 20.6654590 | 17.0584340 | C | 9.7217560  | 20.0223860 | 19.0376750 |
| H | 3.6324100  | 19.7962540 | 16.4171560 | H | 8.8317370  | 20.0991150 | 18.4039820 |
| H | 4.0435980  | 21.5245170 | 16.4480430 | C | 10.5881120 | 18.9031330 | 18.4429990 |
| H | 2.8549590  | 20.8752070 | 17.6123680 | H | 10.8197750 | 19.1224570 | 17.3968810 |
| C | 5.6980990  | 21.3797270 | 18.3937080 | H | 10.0779360 | 17.9369450 | 18.4899270 |
| H | 5.5290730  | 22.3502370 | 17.9417100 | H | 11.5369860 | 18.8084840 | 18.9787150 |
| C | 6.6999840  | 21.1480540 | 19.3124150 | C | 10.4570980 | 21.3681170 | 18.9792860 |
| H | 7.3533070  | 21.9643360 | 19.6008240 | H | 11.3805590 | 21.3308740 | 19.5652180 |
| C | 6.8677250  | 19.8726160 | 19.8735980 | H | 9.8482410  | 22.1840960 | 19.3818170 |
| C | 5.9791580  | 18.8681970 | 19.4563890 | H | 10.7256300 | 21.6127150 | 17.9475530 |
| H | 6.0666650  | 17.8610620 | 19.8492890 | C | 6.1443450  | 19.1718400 | 22.6752810 |
| C | 4.9959600  | 19.1476880 | 18.5320980 | H | 5.4762180  | 19.4954380 | 21.8699800 |
| H | 4.2933990  | 18.4024000 | 18.1766370 | C | 5.9080770  | 20.1289320 | 23.8521710 |
| C | 7.9399410  | 19.5961000 | 20.8631460 | H | 4.8523330  | 20.1206720 | 24.1376150 |
| C | 9.2909760  | 19.6930220 | 20.4609660 | H | 6.1896980  | 21.1538500 | 23.5947950 |
| C | 10.2780710 | 19.4295630 | 21.4122390 | H | 6.4898250  | 19.8307640 | 24.7290850 |
| H | 11.3238330 | 19.4904970 | 21.1263110 | C | 5.7590210  | 17.7360680 | 23.0563650 |
| C | 9.9464760  | 19.0790380 | 22.7154120 | H | 6.3716530  | 17.3785590 | 23.8896390 |
| H | 10.7299440 | 18.8772540 | 23.4386180 | H | 5.9027880  | 17.0399440 | 22.2237170 |
| C | 8.6123400  | 18.9865800 | 23.0930860 | H | 4.7116340  | 17.6912210 | 23.3684390 |
| H | 8.3651570  | 18.7197010 | 24.1162020 |   |            |            |            |

A2<sup>-</sup>

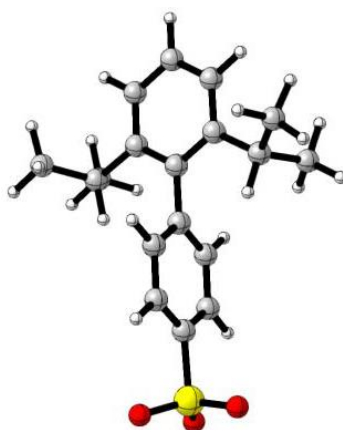

|   |            |            |            |
|---|------------|------------|------------|
| S | 19.0322430 | 12.5889170 | 16.6507380 |
| O | 18.8100310 | 11.8558580 | 17.9138820 |
| O | 17.9259280 | 12.4996040 | 15.6758660 |
| O | 20.3741470 | 12.3925650 | 16.0643690 |
| C | 19.0305770 | 14.3306400 | 17.1526000 |
| C | 18.6191450 | 15.3125110 | 16.2557860 |
| H | 18.2455310 | 15.0035070 | 15.2839790 |
| C | 18.6726900 | 16.6567430 | 16.6236320 |
| H | 18.3413730 | 17.4279280 | 15.9307760 |
| C | 19.1368400 | 17.0314630 | 17.8887980 |
| C | 19.5379850 | 16.0334260 | 18.7842340 |
| H | 19.8881710 | 16.3203400 | 19.7738430 |
| C | 19.4858670 | 14.6893950 | 18.4191080 |
| H | 19.7784300 | 13.9017080 | 19.1071830 |
| C | 19.1830220 | 18.4736540 | 18.2853650 |
| C | 18.0526720 | 19.0755970 | 18.8716660 |
| C | 18.1083990 | 20.4284300 | 19.2236990 |
| H | 17.2394300 | 20.9005910 | 19.6764410 |
| C | 19.2580370 | 21.1772170 | 19.0031570 |
| H | 19.2870380 | 22.2276060 | 19.2795660 |
| C | 20.3741700 | 20.5754420 | 18.4291380 |
| H | 21.2702670 | 21.1663410 | 18.2598970 |
| C | 20.3572640 | 19.2257860 | 18.0678560 |
| C | 16.7749320 | 18.2923710 | 19.1325990 |
| H | 16.9372460 | 17.2620930 | 18.8051820 |
| C | 15.6025980 | 18.8572000 | 18.3213370 |
| H | 15.3771290 | 19.8884560 | 18.6171090 |
| H | 14.7023820 | 18.2546490 | 18.4807680 |
| H | 15.8324690 | 18.8541660 | 17.2516680 |
| C | 16.4402220 | 18.2550210 | 20.6286560 |
| H | 17.2694560 | 17.8302890 | 21.2022640 |
| H | 15.5508260 | 17.6411780 | 20.8047420 |
| H | 16.2391740 | 19.2604360 | 21.0163870 |
| C | 21.5726820 | 18.6004250 | 17.3996770 |
| H | 21.4902300 | 17.5149830 | 17.5083250 |
| C | 21.5705630 | 18.9162630 | 15.8975270 |
| H | 21.6278680 | 19.9994240 | 15.7352360 |
| H | 20.6576810 | 18.5460920 | 15.4226700 |
| H | 22.4273040 | 18.4459670 | 15.4035390 |
| C | 22.8973210 | 19.0312230 | 18.0377240 |
| H | 23.7207420 | 18.4495670 | 17.6115730 |
| H | 22.8876460 | 18.8712970 | 19.1201370 |
| H | 23.1142700 | 20.0890310 | 17.8514000 |

C3<sup>+</sup>

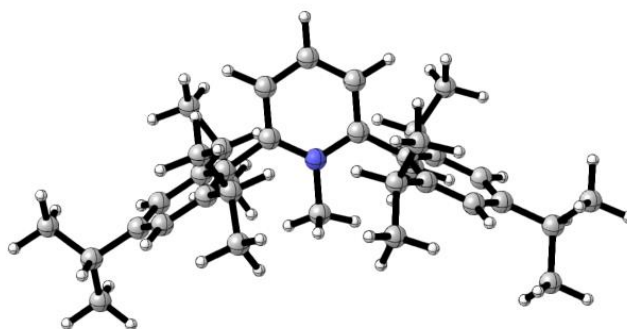

|   |            |            |            |   |            |            |            |
|---|------------|------------|------------|---|------------|------------|------------|
| N | 0.0007150  | 0.2062710  | 0.5259040  | H | -3.3052340 | 4.2549740  | 1.3990240  |
| C | -1.1937310 | 0.2509860  | 1.1845120  | H | -3.6280440 | 2.7001530  | 2.1916020  |
| C | -1.2052710 | 0.5135480  | 2.5480030  | C | 2.4651890  | 0.2516300  | 0.4134660  |
| H | -2.1654280 | 0.5470120  | 3.0499100  | C | 2.9887340  | -1.0311730 | 0.1526260  |
| C | -0.0119950 | 0.7112560  | 3.2327470  | C | 4.2075640  | -1.1162740 | -0.5149270 |
| H | -0.0170710 | 0.9138240  | 4.2988780  | H | 4.6326040  | -2.0971160 | -0.7130140 |
| C | 1.1882430  | 0.6309020  | 2.5372690  | C | 4.9056590  | 0.0227820  | -0.9311300 |
| H | 2.1450120  | 0.7605330  | 3.0301190  | C | 4.3485600  | 1.2728980  | -0.6689380 |
| C | 1.1909300  | 0.3695840  | 1.1728330  | H | 4.8814640  | 2.1622760  | -0.9975080 |
| C | 0.0042010  | -0.0820570 | -0.9269590 | C | 3.1294800  | 1.4177920  | -0.0006500 |
| H | 0.0211840  | -1.1671980 | -1.0686300 | C | 2.2888630  | -2.2958750 | 0.6297980  |
| H | 0.8927140  | 0.3592980  | -1.3706480 | H | 1.2573970  | -2.0414790 | 0.9099760  |
| H | -0.8998370 | 0.3291100  | -1.3689420 | C | 2.9784550  | -2.8404170 | 1.8888590  |
| C | -2.4549240 | -0.0019930 | 0.4355940  | H | 4.0124880  | -3.1209180 | 1.6646120  |
| C | -2.8643230 | -1.3299920 | 0.2234770  | H | 2.4573090  | -3.7272590 | 2.2612420  |
| C | -4.0775370 | -1.5428100 | -0.4336050 | H | 3.0009620  | -2.0913590 | 2.6865870  |
| H | -4.4222270 | -2.5608250 | -0.5978230 | C | 2.2063100  | -3.3723630 | -0.4581140 |
| C | -4.8717160 | -0.4867850 | -0.8817680 | H | 1.7547100  | -2.9865790 | -1.3777640 |
| C | -4.4227160 | 0.8192630  | -0.6672730 | H | 1.6055070  | -4.2157220 | -0.1060350 |
| H | -5.0287150 | 1.6510470  | -1.0187800 | H | 3.1963700  | -3.7622520 | -0.7111310 |
| C | -3.2202050 | 1.0898610  | -0.0163340 | C | 6.2344080  | -0.1028840 | -1.6496820 |
| C | -2.0546440 | -2.5134410 | 0.7332230  | H | 6.5763660  | 0.9138380  | -1.8780250 |
| H | -1.0549550 | -2.1561720 | 1.0164510  | C | 6.0827310  | -0.8612690 | -2.9741380 |
| C | -2.7027660 | -3.0962800 | 1.9969440  | H | 5.7697670  | -1.8963410 | -2.7998560 |
| H | -2.7988140 | -2.3387310 | 2.7809970  | H | 7.0378090  | -0.8889390 | -3.5059880 |
| H | -2.1066530 | -3.9257980 | 2.3883920  | H | 5.3413950  | -0.3867460 | -3.6231270 |
| H | -3.7053880 | -3.4733870 | 1.7718930  | C | 7.2872720  | -0.7675430 | -0.7538040 |
| C | -1.8603640 | -3.5982930 | -0.3323380 | H | 7.4070010  | -0.2272530 | 0.1893040  |
| H | -2.8076590 | -4.0803060 | -0.5900340 | H | 8.2554400  | -0.7925820 | -1.2615770 |
| H | -1.1904990 | -4.3768870 | 0.0436610  | H | 7.0072870  | -1.8004670 | -0.5206400 |
| H | -1.4323610 | -3.1907060 | -1.2539640 | C | 2.5613530  | 2.8093120  | 0.2355270  |
| C | -6.1877380 | -0.7484370 | -1.5873610 | H | 1.5670180  | 2.7086470  | 0.6887680  |
| H | -6.3195490 | -1.8362490 | -1.6339170 | C | 2.3803610  | 3.5755930  | -1.0815410 |
| C | -6.1652450 | -0.2112630 | -3.0238190 | H | 3.3428180  | 3.7665280  | -1.5652080 |
| H | -6.0629910 | 0.8792220  | -3.0325430 | H | 1.9064690  | 4.5430520  | -0.8927330 |
| H | -7.0983670 | -0.4612280 | -3.5363090 | H | 1.7556740  | 3.0194570  | -1.7876570 |
| H | -5.3347030 | -0.6349380 | -3.5953730 | C | 3.4374750  | 3.6006180  | 1.2150520  |
| C | -7.3656910 | -0.1607490 | -0.8001180 | H | 3.5432150  | 3.0774130  | 2.1703180  |
| H | -7.3916750 | -0.5431040 | 0.2240020  | H | 3.0034350  | 4.5860080  | 1.4070130  |
| H | -8.3111680 | -0.4155120 | -1.2869380 | H | 4.4409600  | 3.7488700  | 0.8040190  |
| H | -7.2994990 | 0.9315240  | -0.7536430 |   |            |            |            |
| C | -2.7720370 | 2.5303490  | 0.1854150  |   |            |            |            |
| H | -1.7415430 | 2.5242110  | 0.5646400  |   |            |            |            |
| C | -2.7615620 | 3.3185510  | -1.1305300 |   |            |            |            |
| H | -2.1572830 | 2.8198600  | -1.8946580 |   |            |            |            |
| H | -2.3504820 | 4.3185820  | -0.9661640 |   |            |            |            |
| H | -3.7725160 | 3.4402660  | -1.5301690 |   |            |            |            |
| C | -3.6476410 | 3.2294170  | 1.2339750  |   |            |            |            |
| H | -4.6888110 | 3.2697890  | 0.8982970  |   |            |            |            |

A3<sup>-</sup>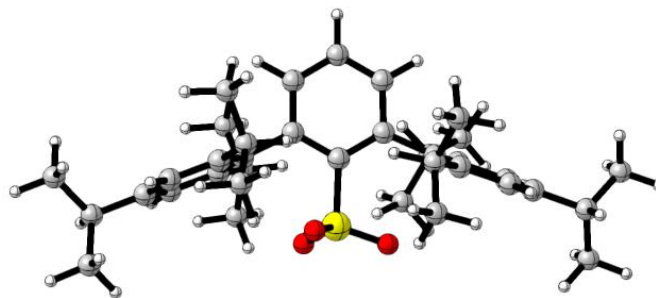

|   |            |            |            |   |            |            |            |
|---|------------|------------|------------|---|------------|------------|------------|
| S | -0.0730870 | -0.1807470 | -1.3615250 | H | -1.5867300 | -2.2075590 | 0.8466500  |
| O | 1.3160240  | -0.2196890 | -1.8488940 | H | -3.9648160 | -3.6948030 | -0.3609630 |
| O | -0.7886190 | -1.4678690 | -1.4913600 | H | -2.3541060 | -4.3320690 | -0.0105800 |
| O | -0.8318850 | 0.9998580  | -1.8199260 | H | -2.5431940 | -3.0784840 | -1.2547490 |
| C | 0.0266700  | 0.0427120  | 0.4519840  | H | -4.2938000 | -2.9119830 | 2.1047120  |
| C | -1.1879510 | 0.1739870  | 1.1563980  | H | -2.9793150 | -2.0398790 | 2.9134900  |
| C | -1.1653640 | 0.2916370  | 2.5479510  | H | -2.7574480 | -3.7370570 | 2.4408160  |
| C | 0.0365320  | 0.2663640  | 3.2504730  | H | -6.8218140 | 1.3568360  | -1.2352420 |
| C | 1.2266830  | 0.1346310  | 2.5501960  | H | -6.4668100 | -1.5211180 | -2.2182360 |
| C | 1.2437200  | 0.0313180  | 1.1499570  | H | -5.9688380 | -0.0714310 | -3.0961660 |
| C | -2.5405890 | 0.1945650  | 0.5046950  | H | -7.6953960 | -0.3745280 | -2.7851870 |
| C | -3.2680850 | -1.0012870 | 0.3719710  | H | -7.4077610 | -1.2895320 | 0.1900270  |
| C | -4.5730190 | -0.9432100 | -0.1197020 | H | -8.6187550 | -0.1474030 | -0.4163060 |
| C | -5.1651670 | 0.2636960  | -0.4919490 | H | -7.5381890 | 0.3173130  | 0.9180720  |
| C | -4.4133540 | 1.4305740  | -0.3747660 | H | -1.2650430 | 2.4582990  | 0.3224490  |
| C | -3.1034730 | 1.4188740  | 0.1104660  | H | -3.4552590 | 3.9732230  | -1.1723630 |
| C | -2.6698430 | -2.3409580 | 0.7721490  | H | -2.1608210 | 2.9907950  | -1.9180080 |
| C | -2.9045460 | -3.4246840 | -0.2840980 | H | -1.7623860 | 4.4379530  | -0.9667270 |
| C | -3.2051000 | -2.7824030 | 2.1412510  | H | -3.8168610 | 3.7702290  | 1.4021170  |
| C | -6.5799430 | 0.3035710  | -1.0396220 | H | -2.1753510 | 4.4301090  | 1.5576610  |
| C | -6.6856630 | -0.4580170 | -2.3667120 | H | -2.6073580 | 2.9139420  | 2.3756120  |
| C | -7.5981010 | -0.2324460 | -0.0259520 | H | 4.8321830  | -2.4228340 | -0.5305650 |
| C | -2.3226920 | 2.7187290  | 0.2190660  | H | 5.3143640  | 1.8142830  | -0.2360300 |
| C | -2.4399240 | 3.5797960  | -1.0416540 | H | 1.2383230  | -2.3081400 | 0.5250290  |
| C | -2.7545650 | 3.5040450  | 1.4651180  | H | 3.1732430  | -3.7393440 | -1.3511730 |
| C | 2.6056070  | -0.0889940 | 0.5295980  | H | 1.8464960  | -2.6469280 | -1.8413310 |
| C | 3.1141570  | -1.3509980 | 0.1920100  | H | 1.4883110  | -4.1710360 | -1.0018990 |
| C | 4.4306190  | -1.4456080 | -0.2659450 | H | 3.7856900  | -3.8675400 | 1.1954610  |
| C | 5.2396920  | -0.3235150 | -0.4182550 | H | 2.1232740  | -4.4211040 | 1.4719160  |
| C | 4.7019810  | 0.9254140  | -0.1010610 | H | 2.7569520  | -3.0210640 | 2.3649100  |
| C | 3.3976300  | 1.0650820  | 0.3742260  | H | 6.8460780  | -1.5222050 | -1.1052590 |
| C | 2.2621260  | -2.6067230 | 0.2800080  | H | 6.6833560  | 1.3499790  | -2.1532380 |
| C | 2.1936760  | -3.3353260 | -1.0669300 | H | 6.1112860  | -0.0850500 | -3.0112120 |
| C | 2.7607570  | -3.5330580 | 1.3966490  | H | 7.8472350  | 0.1179370  | -2.6724090 |
| C | 6.6602700  | -0.4531620 | -0.9360530 | H | 7.5487560  | 1.1159010  | 0.2817610  |
| C | 6.8371000  | 0.2721720  | -2.2757140 | H | 8.7083550  | -0.1012780 | -0.2785620 |
| C | 7.6861900  | 0.0461360  | 0.0886670  | H | 7.5776560  | -0.4815500 | 1.0408850  |
| C | 2.8116250  | 2.4486230  | 0.6204240  | H | 2.0472570  | 2.3552470  | 1.3994660  |
| C | 2.1147890  | 2.9577800  | -0.6510570 | H | 2.8453390  | 3.0548570  | -1.4629280 |
| C | 3.8393830  | 3.4713740  | 1.1143630  | H | 1.6633380  | 3.9406990  | -0.4694350 |
| H | -2.1107010 | 0.3964680  | 3.0748870  | H | 1.3358000  | 2.2727120  | -0.9966040 |
| H | 0.0420750  | 0.3485260  | 4.3336590  | H | 4.5529280  | 3.7395420  | 0.3271620  |
| H | 2.1776290  | 0.1161370  | 3.0773520  | H | 4.4051620  | 3.0936100  | 1.9727060  |
| H | -5.1368790 | -1.8683970 | -0.2245740 | H | 3.3297100  | 4.3929930  | 1.4143470  |
| H | -4.8589120 | 2.3741420  | -0.6844550 |   |            |            |            |











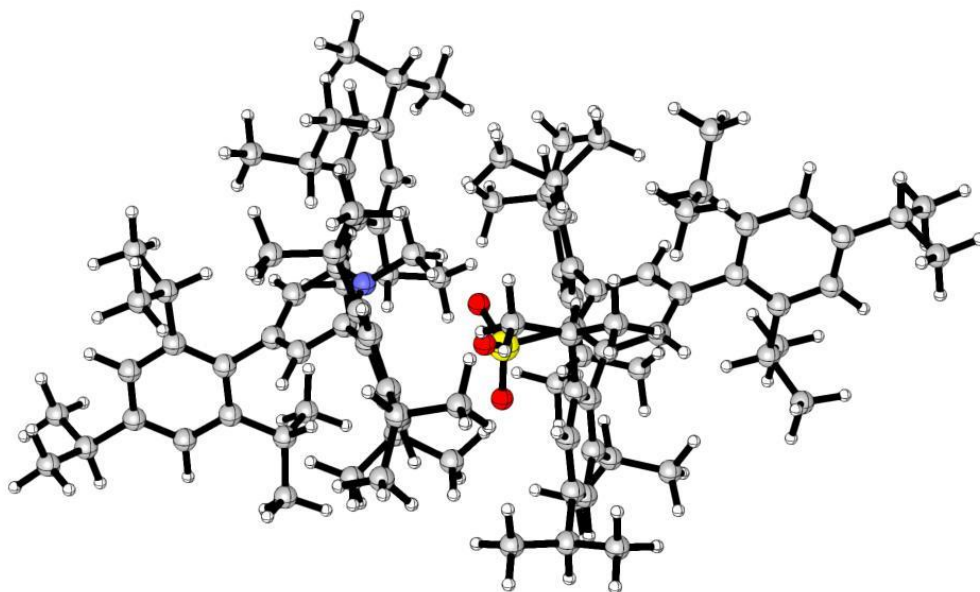

|   |             |             |             |   |             |             |             |   |             |             |             |
|---|-------------|-------------|-------------|---|-------------|-------------|-------------|---|-------------|-------------|-------------|
| S | 0.63606400  | -0.24050200 | -1.00424900 | H | 10.76514600 | 0.53185400  | 2.65269100  | H | 0.21528800  | -8.40715900 | -1.11091800 |
| C | 2.42517100  | -0.12394300 | -0.71284400 | C | 11.46446900 | -1.05199300 | 1.38989400  | H | -0.46170800 | -6.77834700 | -1.30748800 |
| C | 3.14870600  | -1.31790300 | -0.51823700 | H | 11.49086600 | -1.32920800 | 0.33045300  | C | 2.86520800  | -7.71952800 | -0.91650200 |
| C | 4.49376500  | -1.25001100 | -0.15077400 | H | 10.95602800 | -1.85327900 | 1.93351100  | H | 2.92626200  | -7.61625300 | 0.17282500  |
| H | 5.04099900  | -2.17885900 | 0.00331700  | H | 12.49789600 | -0.99087700 | 1.74630200  | H | 3.82338200  | -7.40135400 | -1.33680400 |
| C | 5.15078500  | -0.02849200 | 0.00116700  | C | 11.47671400 | 1.40918400  | 0.83192800  | H | 2.71640300  | -8.77932800 | -1.14929800 |
| C | 4.44107200  | 1.12915500  | -0.28822500 | H | 12.51071600 | 1.49742900  | 1.18097400  | C | 1.01853300  | 3.43812300  | 2.08423900  |
| H | 4.95240400  | 2.08898400  | -0.25116200 | H | 10.97755200 | 2.37144100  | 0.97684000  | H | 0.90522100  | 4.52859900  | 2.12232600  |
| C | 3.08761800  | 1.11007900  | -0.65811400 | H | 11.50223000 | 1.20254800  | -0.24355900 | H | 0.95592600  | 3.06214500  | 3.11240900  |
| C | 2.60988400  | -2.69716600 | -0.75762100 | C | 7.26998700  | -0.45115400 | -2.00679400 | H | 0.17841700  | 3.03773500  | 1.50785800  |
| C | 2.59918400  | -3.19520500 | -2.07265800 | H | 6.19123800  | -0.61406300 | -2.09097700 | C | 3.53151800  | 3.64186000  | 2.22262600  |
| C | 2.27682000  | -4.54093600 | -2.27504300 | H | 7.96356400  | -1.70903500 | -2.54004000 | H | 4.49205400  | 3.34289100  | 1.79038500  |
| H | 2.28296200  | -4.94187600 | -3.28666900 | C | 9.05289800  | -1.59526500 | -2.54890100 | H | 3.51087400  | 3.31378200  | 3.26799600  |
| C | 1.96892200  | -5.39510000 | -1.21874100 | H | 7.64160800  | -1.91025800 | -3.56700800 | H | 3.48662600  | 4.73686900  | 2.21210500  |
| C | 1.95736200  | -4.86596800 | 0.07369700  | C | 7.71999000  | -2.58313300 | -1.92783100 | N | -2.68032700 | 0.20172300  | 1.13109300  |
| H | 1.71136000  | -5.51275900 | 0.91493600  | H | 6.10784000  | 0.77398500  | -2.86540200 | C | -1.37693000 | 0.34586500  | 1.82505400  |
| C | 2.27393200  | -3.52972100 | 0.32505500  | H | 7.08809800  | 1.66415700  | -2.50079300 | H | -0.71667700 | 0.91244900  | 1.16621800  |
| C | 3.03224500  | -2.33651400 | -3.25212400 | H | 7.31448500  | 0.60583600  | -3.90661400 | H | -0.95794400 | -0.64420800 | 1.97748100  |
| H | 2.97538500  | -1.28828700 | -2.94537500 | H | 8.68719900  | 0.97910700  | -2.84214100 | H | -1.53752600 | 0.87160400  | 2.76768200  |
| C | 4.49326900  | -2.64710900 | -3.60818600 | C | 2.56641900  | 2.46726100  | -1.03128600 | C | -3.23172400 | -1.02375200 | 0.91504400  |
| H | 4.59166400  | -3.67537500 | -3.97592000 | C | 2.38831000  | 3.42908200  | -0.02719100 | C | -4.45083600 | -1.10655900 | 0.24738200  |
| H | 5.14232400  | -2.54196400 | -2.73221100 | C | 2.23905100  | 4.77348100  | -0.38920100 | H | -4.89311000 | -2.08837300 | 0.12902800  |
| H | 4.85627000  | -1.96713800 | -4.38821400 | H | 2.13746200  | 5.51677000  | 0.39856600  | C | -5.11216100 | 0.01959500  | -0.21813800 |
| C | 2.11943300  | -2.48438400 | -4.47104800 | C | 2.26401700  | 5.17756600  | -1.72135800 | C | -4.52714900 | 1.25548500  | 0.05381100  |
| H | 2.42293900  | -1.77159700 | -5.24618300 | C | 2.36395500  | 4.48723900  | -2.70397600 | H | -5.02511800 | 2.17668900  | -0.22832000 |
| H | 1.08509400  | -2.26918400 | -4.19294200 | H | 2.34246400  | 4.49366300  | -3.74773100 | C | -3.32548200 | 1.34239800  | 0.73305100  |
| H | 2.17836200  | -3.48759600 | -4.90783900 | C | 2.50483200  | 2.83452900  | -2.39261300 | C | -2.66984200 | -2.31309800 | 1.41761400  |
| C | 2.27389900  | -3.01571600 | 1.75630900  | C | 2.35431500  | 3.04087900  | 1.44412600  | C | -2.30757700 | -3.29911700 | 0.47650800  |
| H | 2.50503300  | -1.94534600 | 1.72811000  | H | 2.43044900  | 1.94953200  | 1.50318800  | C | -2.05496800 | -4.59361100 | 0.94403400  |
| C | 0.89852200  | -3.17208100 | 2.41278700  | C | 2.16087100  | 6.63599000  | -2.13867700 | H | -1.76422000 | -5.35361900 | 0.22317400  |
| H | 0.12820200  | -2.69989600 | 1.79845000  | H | 2.75785300  | 6.74291400  | -3.05435300 | C | -2.18852900 | -4.93613700 | 2.28749500  |
| H | 0.89808100  | -2.71509000 | 3.41041700  | C | 2.72458500  | 7.60955300  | -1.10114900 | C | -2.51093200 | -3.92625100 | 3.19674100  |
| C | 0.64032400  | -4.22840400 | 2.53227600  | H | 2.09212700  | 7.64835700  | -0.20708700 | H | -2.59766300 | -4.18727600 | 4.24825900  |
| C | 3.35068900  | -3.72400100 | 2.58986600  | H | 2.76169200  | 8.62169800  | -1.51566000 | C | -2.75775700 | -2.61526500 | 2.79505100  |
| H | 3.12308900  | -4.79219800 | 2.68468200  | H | 3.73445200  | 7.32503700  | -0.79144600 | C | -2.21848300 | -3.03328400 | -1.02270500 |
| H | 3.40173200  | -3.29932600 | 3.59854600  | C | 0.71377300  | 7.01074200  | -2.48438400 | H | -2.22025700 | -1.94866000 | -1.18427900 |
| H | 4.33979200  | -3.63516700 | 2.12909500  | H | 0.31619600  | 6.37115000  | -3.27787100 | C | -3.40073300 | -3.67054700 | -1.77396400 |
| C | 6.58624200  | 0.04541000  | 0.40813900  | H | 0.64887600  | 8.05376300  | -2.81305000 | H | -3.40139900 | -4.75566200 | -1.62031100 |
| C | 6.92016800  | 0.36927500  | 1.73871600  | H | 0.07541600  | 6.89057300  | -1.60044700 | H | -3.29601200 | -3.48588500 | -2.84827100 |
| C | 8.26965300  | 0.43629600  | 2.09279300  | C | 2.61147300  | 1.78322900  | -3.49351100 | H | -4.38006500 | -3.29341300 | -1.46324000 |
| H | 8.54410900  | 0.68051700  | 3.11589100  | C | 2.07732000  | 0.89187700  | -3.14658600 | C | -0.91318900 | -3.56669200 | -1.62469100 |
| C | 9.28871200  | 0.20323400  | 1.16875200  | H | 1.93147300  | 2.20699100  | -4.79824500 | H | -0.05472800 | -3.26057700 | -1.02858700 |
| C | 8.93190300  | -0.09922600 | -0.14454500 | H | 2.49121000  | 2.99556100  | -5.31447900 | H | -0.77892300 | -3.15711600 | -2.63006800 |
| H | 9.71382200  | -0.26489000 | -0.88360700 | H | 0.91318300  | 2.56485500  | -4.62031500 | H | -0.93126800 | -4.65961700 | -1.69984500 |
| C | 7.59627500  | -0.18305800 | -0.54480100 | H | 1.87598300  | 1.34772400  | -5.47324400 | C | -1.99598900 | -6.35662300 | 2.79147000  |
| C | 5.83129200  | 0.58281300  | 2.78257300  | C | 4.06941100  | 1.38762300  | -3.77741400 | H | -2.59499200 | -6.44515300 | 3.70763300  |
| H | 4.96520100  | 1.02243800  | 2.27446500  | H | 4.10613900  | 0.64461800  | -4.58313500 | C | -3.21493800 | -1.58114100 | 3.81876500  |
| C | 5.38334900  | -0.76723500 | 3.35971400  | H | 4.55476400  | 0.95316900  | -2.89848600 | H | -2.83458200 | -0.60512100 | 3.50859500  |
| H | 5.02028400  | -1.42970400 | 2.56941600  | H | 4.65145700  | 2.26248700  | -4.09158500 | C | -4.74768300 | -1.48066900 | 3.86504800  |
| H | 4.57480100  | -0.62876000 | 4.08630900  | O | 0.10195600  | 1.11934400  | -0.75263600 | H | -5.16992700 | -1.21388300 | 2.89018100  |
| H | 6.22061000  | -1.26353800 | 3.86388200  | O | 0.46253000  | -0.70182600 | -2.39395200 | H | -5.05747900 | -0.71613200 | 4.58768100  |
| C | 6.23299900  | 1.54034600  | 3.90655900  | O | 0.16373800  | -1.21093300 | 0.01189500  | H | -5.18361800 | -2.43807600 | 4.17018500  |
| H | 6.99999600  | 1.10570200  | 4.55640800  | H | 1.71312200  | -6.87035200 | -1.47057700 | C | -2.65510900 | -1.82716700 | 5.22290900  |
| H | 5.36281700  | 1.75747500  | 4.53392900  | H | 1.68028400  | -7.01241300 | -2.55844700 | H | -3.11500600 | -2.70048300 | 5.69596600  |
| H | 6.61424000  | 2.48729300  | 3.51158800  | C | 0.37702100  | -7.34614300 | -0.89251300 | H | -2.86710500 | -0.96391500 | 5.86093000  |
| C | 10.74606600 | 0.28899600  | 1.58242000  | H | 0.36323400  | -7.22611000 | 0.19626600  | H | -1.57195800 | -1.97969000 | 5.19801000  |

|   |              |             |             |   |             |             |             |   |             |             |            |
|---|--------------|-------------|-------------|---|-------------|-------------|-------------|---|-------------|-------------|------------|
| C | -6.41863400  | -0.09424600 | -0.92326900 | C | -5.13839200 | -0.65553700 | -3.05662800 | C | -1.47528500 | 6.60052900  | 2.36325700 |
| C | -7.60835600  | 0.14061200  | -0.21211500 | H | -4.39925300 | -1.08797900 | -2.37139000 | H | -0.91594900 | 6.43828600  | 3.29542900 |
| C | -8.82151400  | 0.01771100  | -0.89223500 | C | -5.26715900 | -1.61798100 | -4.23860500 | C | -0.54816300 | 7.30725200  | 1.37556300 |
| H | -9.74912200  | 0.18560400  | -0.34844800 | H | -5.87449500 | -1.19091900 | -5.04341400 | H | -1.09094600 | 7.61724600  | 0.47527900 |
| C | -8.87571300  | -0.32563000 | -2.24279600 | H | -5.71322600 | -2.57067400 | -3.93640300 | H | 0.27710800  | 6.65863900  | 1.06429700 |
| C | -7.67646500  | -0.55887100 | -2.91820300 | H | -4.27558400 | -1.82019700 | -4.65356300 | H | -0.12682500 | 8.20795800  | 1.83136300 |
| H | -7.71729700  | -0.83233800 | -3.96889300 | C | -4.58737000 | 0.69935000  | -3.52524500 | C | -2.68467200 | 7.49119400  | 2.68677000 |
| C | -6.43670700  | -0.45544900 | -2.28511600 | H | -3.62623400 | 0.56802200  | -4.03221300 | H | -2.35657600 | 8.46325100  | 3.06826600 |
| C | -7.61234500  | 0.46123300  | 1.27661800  | H | -4.43188500 | 1.38049400  | -2.68390300 | H | -3.33612900 | 7.03138800  | 3.43543600 |
| H | -6.57676400  | 0.60508700  | 1.60587900  | H | -5.28910600 | 1.17551500  | -4.21932700 | H | -3.27809600 | 7.65998300  | 1.78163500 |
| C | -8.18091500  | -0.71535800 | 2.08116600  | C | -2.79975500 | 2.68216000  | 1.12004700  | C | -3.73331400 | 2.24055600  | 3.46292800 |
| H | -9.23009900  | -0.89369000 | 1.82226100  | C | -2.27045800 | 3.54997200  | 0.15122900  | H | -3.78155500 | 1.21120200  | 3.09094500 |
| H | -8.12496500  | -0.50764900 | 3.15497600  | C | -1.84486600 | 4.81770800  | 0.56899600  | C | -5.18475200 | 2.73746500  | 3.54612000 |
| H | -7.62443200  | -1.63618600 | 1.87888100  | H | -1.40017600 | 5.47621000  | -0.17110300 | H | -5.21960300 | 3.75534500  | 3.94897000 |
| C | -8.36908900  | 1.75815300  | 1.58418300  | C | -1.94004300 | 5.23257200  | 1.89305900  | H | -5.77961700 | 2.08600700  | 4.19648300 |
| H | -7.95788800  | 2.60015400  | 1.01850300  | C | -2.51278600 | 4.35742700  | 2.82329700  | H | -5.65115200 | 2.75343500  | 2.55497200 |
| H | -8.30051900  | 1.99359300  | 2.65106500  | H | -2.61672500 | 4.68618700  | 3.85567400  | C | -3.09230100 | 2.18659700  | 4.85231800 |
| H | -9.43035400  | 1.67001300  | 1.33039700  | C | -2.96290200 | 3.09297300  | 2.46165700  | H | -2.04642000 | 1.86581200  | 4.80378600 |
| C | -10.20623600 | -0.45345400 | -2.96034200 | C | -2.18957200 | 3.19122600  | -1.32444100 | H | -3.63877000 | 1.48099400  | 5.48705700 |
| H | -9.98760700  | -0.71735700 | -4.00262000 | H | -2.25103600 | 2.10125100  | -1.42145600 | H | -3.12209000 | 3.16160400  | 5.34817300 |
| C | -11.05951200 | -1.57630700 | -2.35767900 | C | -3.35312200 | 3.84924400  | -2.08581600 | C | -2.49845300 | -7.41398800 | 1.80459800 |
| H | -10.52327200 | -2.52933300 | -2.36732900 | H | -4.33770100 | 3.55145100  | -1.71208600 | H | -2.46115300 | -8.40522400 | 2.26634300 |
| H | -11.98992000 | -1.69614300 | -2.92137200 | H | -3.30081900 | 3.59073800  | -3.14850100 | H | -1.87675900 | -7.44960500 | 0.90445300 |
| H | -11.32433500 | -1.34857800 | -1.31935500 | H | -3.28452700 | 4.93949800  | -1.99913400 | H | -3.52950000 | -7.21434400 | 1.49799800 |
| C | -10.97324700 | 0.87439400  | -2.95983900 | C | -0.86629900 | 3.62444900  | -1.96075600 | C | -0.53261300 | -6.61938700 | 3.17055100 |
| H | -11.23910400 | 1.17008300  | -1.93910700 | H | -0.84173100 | 4.70668800  | -2.12402200 | H | -0.18570200 | -5.91746300 | 3.93482400 |
| H | -11.90099000 | 0.78148600  | -3.53287900 | H | -0.75280100 | 3.13599000  | -2.93349700 | H | 0.11359800  | -6.50627900 | 2.29311000 |
| H | -10.37427900 | 1.67769400  | -3.39783200 | H | -0.01522600 | 3.33214900  | -1.34642500 | H | -0.41244400 | -7.63792200 | 3.55365000 |

1<sub>trunc</sub> (first geometry)

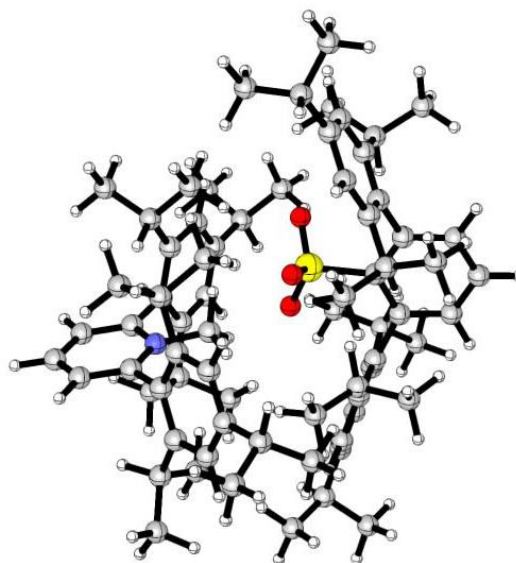

|   |            |            |            |   |            |            |            |   |            |            |            |
|---|------------|------------|------------|---|------------|------------|------------|---|------------|------------|------------|
| N | -2.2377340 | -0.8291440 | 2.3156690  | C | 0.0548770  | -3.9498870 | 0.9452720  | H | -3.7121730 | 5.2481120  | -1.2417850 |
| C | -1.9827860 | -0.0909570 | 3.4303850  | H | 0.1093550  | -4.7023170 | 0.1513130  | C | -4.9419700 | 3.6668310  | -1.9894980 |
| C | -2.7635070 | -0.2911230 | 4.5626390  | H | 0.8192170  | -4.2009930 | 1.6876100  | H | -5.0855670 | 3.0675670  | -2.8957580 |
| H | -2.5501800 | 0.3092140  | 5.4394240  | H | 0.3173610  | -2.9796730 | 0.5105050  | H | -5.8538770 | 4.2520610  | -1.8358200 |
| C | -3.7712550 | -1.2483500 | 4.5514550  | C | -1.6398050 | -5.3128440 | 2.2394260  | H | -4.8253310 | 2.9797900  | -1.1453110 |
| C | -3.9899920 | -1.9960190 | 3.3999450  | H | -2.6050850 | -5.3037620 | 2.7560940  | C | -3.8985050 | 5.4927850  | -3.3638810 |
| H | -4.7559100 | -2.7618130 | 3.3523130  | H | -0.8631840 | -5.5921000 | 2.9578900  | H | -3.0710890 | 6.2026270  | -3.4495390 |
| C | -3.2105350 | -1.7782760 | 2.2699450  | H | -1.6799400 | -6.0861180 | 1.4649640  | H | -4.8362890 | 6.0570580  | -3.3179350 |
| C | -1.3318620 | -0.6289190 | 1.1627200  | C | -3.7283760 | -4.5826400 | -2.7821650 | H | -3.9092250 | 4.8792820  | -4.2716500 |
| H | -1.7289910 | -1.1197900 | 0.2826640  | H | -2.9136130 | -5.3158810 | -2.8284880 | C | 1.2442390  | 4.7554240  | -1.4581510 |
| H | -0.3650350 | -1.0665570 | 1.4097030  | C | -3.5592250 | -3.6151510 | -3.9599450 | H | 2.1338280  | 4.1597890  | -1.6857960 |
| H | -1.1783970 | 0.4346460  | 0.9806830  | H | -4.3347860 | -2.8413330 | -3.9461540 | C | 1.3988100  | 6.1094130  | -2.1574300 |
| C | -0.8682020 | 0.8972890  | 3.3906880  | H | -3.6386390 | -4.1546630 | -4.9087680 | H | 1.4505140  | 5.9898970  | -3.2442690 |
| C | -1.1481190 | 2.2285610  | 3.0480040  | H | -2.5874070 | -3.1151040 | -3.9281090 | H | 2.3139510  | 6.6080270  | -1.8219340 |
| C | -0.0939210 | 3.1417790  | 3.0559370  | C | -5.0571540 | -5.3419800 | -2.8855820 | H | 0.5580910  | 6.7744370  | -1.9315390 |
| H | -0.2872160 | 4.1769060  | 2.7807000  | H | -5.1835700 | -6.0364900 | -2.0501070 | C | 1.1847830  | 4.9126390  | 0.0686550  |
| C | 1.2137670  | 2.7582680  | 3.3394230  | H | -5.0994600 | -5.9116110 | -3.8188570 | H | 0.3375430  | 5.5490350  | 0.3575590  |
| C | 1.4657180  | 1.4134250  | 3.6192390  | H | -5.9045460 | -4.6477710 | -2.8796930 | H | 2.1033500  | 5.3800020  | 0.4428410  |
| H | 2.4898440  | 1.0894410  | 3.7834510  | C | -5.4113100 | -1.0768390 | 0.4735300  | H | 1.0590990  | 3.9321000  | 0.5415010  |
| C | 0.4470750  | 0.4650320  | 3.6496100  | H | -5.5636220 | -1.0845980 | 1.5589960  | C | 3.6843570  | -0.9186190 | -1.6065220 |
| C | -2.5207900 | 2.6749510  | 2.5707990  | C | -4.8202410 | 0.2921650  | 0.0984180  | C | 4.7213060  | -0.9042510 | -0.6586570 |
| H | -3.1894600 | 1.8027530  | 2.5613130  | H | -3.8320790 | 0.4627830  | 0.5417120  | C | 5.1024670  | -2.1075630 | -0.0647660 |
| C | -2.4364360 | 3.2049660  | 1.1310970  | H | -5.4832530 | 1.0969350  | 0.4338890  | H | 5.8975270  | -2.0992760 | 0.6774760  |
| H | -1.8743120 | 4.1450840  | 1.0924900  | H | -4.7074660 | 0.3709660  | -0.9884720 | C | 4.4791100  | -3.3155900 | -0.3826110 |
| H | -3.4405180 | 3.3998020  | 0.7358580  | C | -6.7903240 | -1.2442970 | -0.1700960 | C | 3.4597330  | -3.3035790 | -1.3319370 |
| H | -1.9193510 | 2.5091140  | 0.4605670  | H | -6.7492920 | -1.0911230 | -1.2530670 | H | 2.9726280  | -4.2428740 | -1.5887120 |
| C | -3.1419870 | 3.7145320  | 3.5105990  | H | -7.4788290 | -0.4973050 | 0.2350230  | C | 3.0449550  | -2.1231000 | -1.9532040 |
| H | -3.2429650 | 3.3234250  | 4.5282940  | H | -7.2074540 | -2.2374110 | 0.0210660  | C | 5.4350050  | 0.3881950  | -0.2995210 |
| H | -4.1327300 | 4.0125260  | 3.1526520  | S | 1.4790070  | 0.6407840  | -0.1498150 | H | 4.7672060  | 1.2133590  | -0.5656620 |
| H | -2.5172960 | 4.6124410  | 3.5575840  | O | 0.4235580  | 1.6251550  | 0.1771270  | C | 6.7304870  | 0.5240880  | -1.1117860 |
| C | 2.3311940  | 3.7824170  | 3.3316180  | O | 0.9519830  | -0.7440660 | -0.2844360 | H | 7.4144020  | -0.3017800 | -0.8836570 |
| H | 1.9223230  | 4.6946450  | 2.8779860  | O | 2.6576670  | 0.7385470  | 0.7283570  | H | 7.2386850  | 1.4647560  | -0.8731170 |
| C | 3.5312010  | 3.3299240  | 2.4934210  | C | 2.0911220  | 1.0551460  | -1.8050310 | H | 6.5297700  | 0.5064980  | -2.1875330 |
| H | 4.0563850  | 2.4993270  | 2.9778500  | C | 1.4703380  | 2.0232900  | -2.6041640 | C | 5.7208250  | 0.5123330  | 1.1995850  |
| H | 4.2440450  | 4.1547720  | 2.3866920  | C | 2.0897840  | 2.3808280  | -3.8129560 | H | 4.8042280  | 0.3412810  | 1.7702500  |
| H | 3.2240590  | 2.9779730  | 1.5048900  | H | 1.6161360  | 3.1418450  | -4.4281920 | H | 6.0891290  | 1.5192100  | 1.4244680  |
| C | 2.7600780  | 4.1183000  | 4.7667550  | C | 3.2594280  | 1.7640390  | -4.2349720 | H | 6.4894730  | -0.1970800 | 1.5272690  |
| H | 1.9165820  | 4.4840960  | 5.3604350  | H | 3.7254770  | 2.0601820  | -5.1698360 | C | 4.8780240  | -4.6056040 | 0.3092440  |
| H | 3.5419870  | 4.8847380  | 4.7645180  | C | 3.7953220  | 0.7199630  | -3.4827990 | H | 4.3103120  | -5.4169430 | -0.1654020 |
| H | 3.1618060  | 3.2270850  | 5.2621620  | H | 4.6578280  | 0.1658620  | -3.8433410 | C | 6.3698380  | -4.9151550 | 0.1420390  |
| C | 0.7689150  | -0.9895810 | 3.9638880  | C | 3.2114530  | 0.3391160  | -2.2748470 | H | 6.6498100  | -4.9417430 | -0.9148920 |
| H | -0.1103600 | -1.6015870 | 3.7136960  | C | 0.1267920  | 2.6418260  | -2.3429610 | H | 6.6160140  | -5.8828600 | 0.5917220  |
| C | 1.9436090  | -1.5314170 | 3.1375560  | C | -1.0365830 | 1.8913340  | -2.6025000 | H | 6.9844320  | -4.1533930 | 0.6333500  |
| H | 1.7973580  | -1.3971380 | 2.0606000  | C | -2.2791470 | 2.5276690  | -2.5281090 | C | 4.4930840  | -4.5677280 | 1.7937360  |
| H | 2.0767260  | -2.5978080 | 3.3502400  | H | -3.1742080 | 1.9478350  | -2.7343860 | H | 5.0316260  | -3.7654890 | 2.3104800  |
| H | 2.8789150  | -1.0248330 | 3.3958680  | C | -2.4006490 | 3.8722660  | -2.1757120 | H | 4.7375390  | -5.5153380 | 2.2860970  |
| C | 1.0257750  | -1.1645350 | 5.4672010  | C | -1.2362200 | 4.5713520  | -1.8615540 | C | 3.4221600  | -4.3768320 | 1.9107530  |
| H | 1.8975900  | -0.5758690 | 5.7715430  | H | -1.3215910 | 5.6053810  | -1.5272050 | C | 1.9529940  | -2.1770720 | -3.0149760 |
| H | 1.2227410  | -2.2145310 | 5.7065720  | C | 0.0264940  | 3.9809620  | -1.9345360 | H | 1.6147440  | -1.1545920 | -3.2085080 |
| H | 0.1701550  | -0.8263460 | 6.0617220  | O | -0.9603460 | 0.4042260  | -2.9321590 | C | 0.7167970  | -2.9722720 | -2.5814170 |
| C | -3.3880790 | -2.5477180 | 1.0052490  | H | -0.1066530 | -0.0116720 | -2.3891900 | H | 0.9524450  | -0.9260130 | -2.3912580 |
| C | -2.4499930 | -3.5402640 | 0.6721940  | C | -2.1814270 | -0.3799340 | -2.4418320 | H | -0.0369530 | -2.9460290 | -3.3784860 |
| C | -2.5864670 | -4.1860840 | -0.5590790 | H | -2.4591650 | -0.0704400 | -1.4306060 | H | 0.2868060  | -2.5349530 | -1.6765840 |
| H | -1.8671660 | -4.9529800 | -0.8375450 | H | -1.9522450 | -1.4512970 | -2.4168500 | C | 2.5240520  | -2.7279150 | -4.3292190 |
| C | -3.6090330 | -3.8672720 | -1.4497590 | H | -3.0571150 | -0.2433980 | -3.0902880 | H | 3.3741380  | -2.1280790 | -4.6690220 |
| C | -4.5272550 | -2.8771200 | -1.0848080 | C | -0.7339880 | 0.1621080  | -4.4304690 | H | 1.7605700  | -2.7200630 | -5.1152790 |
| H | -5.3247080 | -2.6195300 | -1.7759800 | H | -1.5636970 | 0.5780000  | -5.0141840 | H | 2.8709580  | -3.7593350 | -4.1972670 |
| C | -4.4414100 | -2.2023790 | 0.1316010  | H | -0.6728000 | -0.9132140 | -4.6386660 | H | -4.3762780 | -1.4179340 | 5.4363640  |
| C | -1.3254190 | -3.9446970 | 1.6161580  | H | 0.1947770  | 0.6271060  | -4.7744760 |   |            |            |            |
| H | -1.2812140 | -3.2200390 | 2.4390750  | C | -3.7357900 | 4.5963470  | -2.1271900 |   |            |            |            |

Model ion pair system in Figure 2d (first geometry)

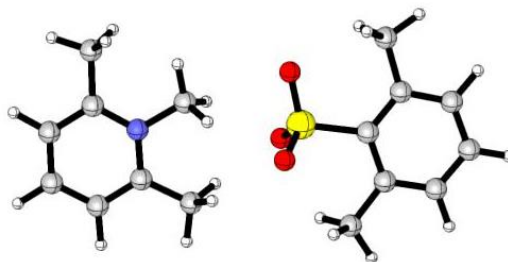

|   |           |            |            |   |            |            |            |
|---|-----------|------------|------------|---|------------|------------|------------|
| C | 2.9083640 | -0.1210850 | -0.3012030 | N | -3.1547440 | 0.4693120  | 0.7164670  |
| C | 3.2419610 | -1.4796870 | -0.4802970 | C | -1.8133630 | 1.1061890  | 0.6740600  |
| C | 4.5687060 | -1.8060950 | -0.7649010 | H | -1.4065480 | 1.0257840  | -0.3366530 |
| C | 5.5423120 | -0.8202290 | -0.8720790 | H | -1.1423050 | 0.5763420  | 1.3518400  |
| C | 5.1915320 | 0.5110680  | -0.7023190 | H | -1.8735990 | 2.1460190  | 0.9681230  |
| C | 3.8738370 | 0.8952020  | -0.4183640 | C | -3.2078620 | -0.8783160 | 0.5097790  |
| H | 4.8335570 | -2.8505300 | -0.9053490 | C | -4.4494910 | -1.5108950 | 0.5366600  |
| H | 6.5710040 | -1.0893990 | -1.0932650 | H | -4.4814480 | -2.5810180 | 0.3728490  |
| H | 5.9490460 | 1.2845090  | -0.7939410 | C | -5.6034510 | -0.7822220 | 0.7649240  |
| S | 1.1734970 | 0.2409240  | 0.0510040  | C | -5.5109300 | 0.5911170  | 0.9617110  |
| O | 1.0312830 | 1.6828480  | 0.3367920  | H | -6.3937100 | 1.1939460  | 1.1360460  |
| O | 0.4251320 | -0.1647920 | -1.1720910 | C | -4.2733120 | 1.2157330  | 0.9338900  |
| O | 0.8181220 | -0.6001380 | 1.2258160  | H | -6.5701820 | -1.2745630 | 0.7861800  |
| C | 3.6014430 | 2.3752440  | -0.2700590 | C | -4.1581920 | 2.6988120  | 1.1314900  |
| C | 2.2355770 | -2.6016840 | -0.3761540 | H | -3.5757540 | 2.9396670  | 2.0249360  |
| H | 2.8358820 | 2.7141870  | -0.9700530 | H | -3.6795250 | 3.1794170  | 0.2743380  |
| H | 3.2286290 | 2.6160370  | 0.7267540  | H | -5.1564430 | 3.1194150  | 1.2499720  |
| H | 4.5263590 | 2.9280350  | -0.4535160 | C | -1.9493890 | -1.6328290 | 0.2546910  |
| H | 1.8953650 | -2.7152420 | 0.6558040  | H | -1.3903330 | -1.2277130 | -0.6002400 |
| H | 1.3536010 | -2.3912320 | -0.9860140 | H | -1.2395420 | -1.5543340 | 1.0877580  |
| H | 2.6913700 | -3.5359700 | -0.7130500 | H | -2.1895470 | -2.6808450 | 0.0768940  |

Model hydrogen-bonded system in Figure 2d (first geometry)

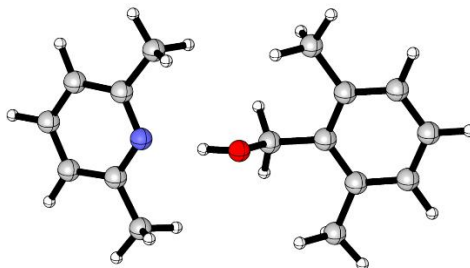

|   |            |           |            |   |            |            |            |
|---|------------|-----------|------------|---|------------|------------|------------|
| C | 1.2639040  | 2.7486370 | 1.1666950  | O | -0.3424270 | 1.0584420  | 1.6674280  |
| C | 2.5061670  | 2.3224920 | 0.6699450  | H | -1.2130780 | 0.7000200  | 1.3973710  |
| C | 3.6696700  | 2.9652530 | 1.1019790  | N | -2.9151300 | 0.3386220  | 0.6820060  |
| C | 3.6080860  | 4.0055740 | 2.0234530  | C | -3.9598900 | 1.0225050  | 1.1656930  |
| C | 2.3760870  | 4.4031590 | 2.5346960  | C | -5.2650150 | 0.7558860  | 0.7451190  |
| C | 1.1979930  | 3.7792080 | 2.1193370  | H | -6.0941320 | 1.3223730  | 1.1553650  |
| H | 4.6320650  | 2.6373410 | 0.7176870  | C | -5.4725380 | -0.2430950 | -0.1997360 |
| H | 4.5190400  | 4.4961520 | 2.3530690  | C | -4.3801560 | -0.9452030 | -0.6983250 |
| H | 2.3252450  | 5.2009140 | 3.2712140  | H | -4.5061860 | -1.7310090 | -1.4353620 |
| C | -0.1280970 | 4.2020730 | 2.7048970  | C | -3.1045580 | -0.6237450 | -0.2297050 |
| C | 2.6044430  | 1.1721840 | -0.3049210 | H | -6.4763870 | -0.4733440 | -0.5437510 |
| H | -0.7431980 | 4.7297220 | 1.9663860  | C | -1.8677380 | -1.3291270 | -0.7149020 |
| H | -0.6920210 | 3.3299490 | 3.0492090  | H | -1.2009930 | -0.6167610 | -1.2105490 |
| H | 0.0226540  | 4.8750980 | 3.5521570  | H | -1.3195950 | -1.7521240 | 0.1314650  |
| H | 2.0399430  | 0.3060340 | 0.0532250  | H | -2.1115120 | -2.1282670 | -1.4173020 |
| H | 2.2111750  | 1.4427410 | -1.2911250 | C | -3.6435900 | 2.0940130  | 2.1731050  |
| H | 3.6463460  | 0.8705890 | -0.4352220 | H | -3.0024370 | 1.6929010  | 2.9626830  |
| C | -0.0087340 | 2.0648830 | 0.7288890  | H | -3.0931300 | 2.9092250  | 1.6914900  |
| H | 0.1192440  | 1.6362080 | -0.2743210 | H | -4.5512020 | 2.5049720  | 2.6191530  |
| H | -0.8181190 | 2.8066210 | 0.6530680  |   |            |            |            |

Model halogen-bonded system in Figure 2d (first geometry)

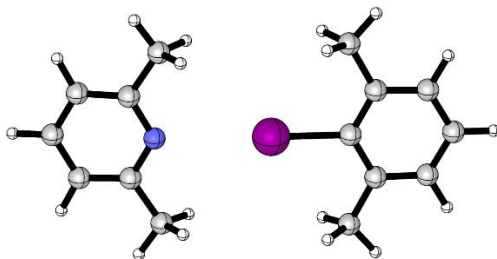

|   |            |           |            |   |            |            |            |
|---|------------|-----------|------------|---|------------|------------|------------|
| C | 1.2187930  | 2.9045940 | 0.7800730  | N | -3.0389150 | -0.1623200 | 0.6366290  |
| C | 1.7339150  | 3.2944440 | 2.0248200  | C | -3.5539120 | -0.6364740 | 1.7776860  |
| C | 2.8919060  | 4.0788670 | 2.0394570  | C | -4.5407500 | -1.6260870 | 1.7868170  |
| C | 3.5155580  | 4.4621100 | 0.8582000  | H | -4.9390990 | -1.9883640 | 2.7286520  |
| C | 2.9843470  | 4.0630210 | -0.3623540 | C | -4.9942650 | -2.1286100 | 0.5726520  |
| C | 1.8282590  | 3.2782900 | -0.4264360 | C | -4.4559340 | -1.6324660 | -0.6090740 |
| H | 3.3032610  | 4.3886020 | 2.9960870  | H | -4.7867440 | -1.9998380 | -1.5747750 |
| H | 4.4137240  | 5.0708610 | 0.8887440  | C | -3.4720500 | -0.6426200 | -0.5354520 |
| H | 3.4681990  | 4.3603160 | -1.2885260 | H | -5.7606530 | -2.8976130 | 0.5475660  |
| C | 1.2862710  | 2.8672520 | -1.7707350 | C | -2.8390880 | -0.0637180 | -1.7716560 |
| C | 1.0900140  | 2.9008940 | 3.3288000  | H | -2.9332730 | 1.0258290  | -1.7666340 |
| H | 1.2554070  | 1.7774040 | -1.8686140 | H | -1.7696010 | -0.2954150 | -1.7893500 |
| H | 0.2636550  | 3.2306310 | -1.9132830 | H | -3.3007690 | -0.4584790 | -2.6790720 |
| H | 1.9102500  | 3.2682950 | -2.5722430 | C | -3.0097820 | -0.0509740 | 3.0524740  |
| H | 0.0597350  | 3.2658100 | 3.3876680  | H | -1.9443240 | -0.2826050 | 3.1470250  |
| H | 1.0509430  | 1.8124130 | 3.4382910  | H | -3.1029240 | 1.0385350  | 3.0350140  |
| H | 1.6509110  | 3.3125770 | 4.1705320  | H | -3.5346610 | -0.4408840 | 3.9270370  |
| I | -0.5388340 | 1.7052510 | 0.7203630  |   |            |            |            |

### 3.2.2 Structures optimized at the M06-2X/6-31G(d) level of theory

4<sub>trunc</sub>

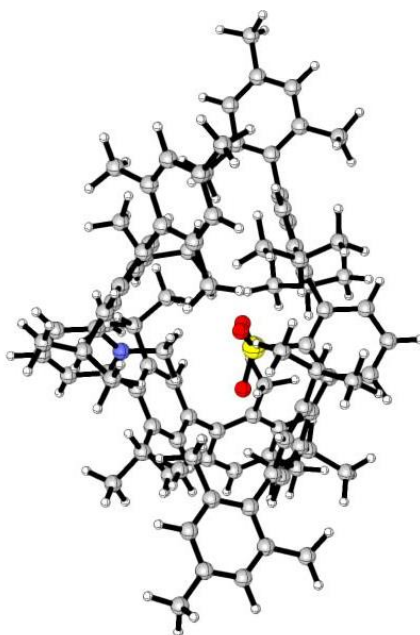

|   |            |            |            |   |            |            |            |   |            |            |            |
|---|------------|------------|------------|---|------------|------------|------------|---|------------|------------|------------|
| N | 0.4940640  | 1.1208190  | 3.2893370  | H | -0.7673580 | -2.4458860 | 2.1654470  | O | -0.3124030 | 0.4642090  | -0.7954340 |
| C | 1.3974230  | 0.4448950  | 4.0520790  | H | -1.8252000 | -2.8639130 | 3.5456310  | O | -0.1846030 | -1.8856510 | -0.0222410 |
| C | 1.5119900  | 0.7546960  | 5.3996990  | H | -0.5164940 | -3.9484290 | 3.0651270  | C | 0.3597250  | -1.3457240 | -2.5373270 |
| H | 2.2473360  | 0.2155900  | 5.9855730  | C | -1.4135060 | 2.6563110  | 2.9583390  | C | 1.3501360  | -0.9639770 | -3.4597870 |
| C | 0.6617480  | 1.6951760  | 5.9699780  | C | -2.4780770 | 1.8889840  | 2.4389080  | C | 1.2764090  | -1.4504520 | -4.7677280 |
| C | -0.3048400 | 2.3006140  | 5.1804500  | C | -3.4227510 | 2.5357040  | 1.6459040  | H | 2.0458780  | -1.1554070 | -5.4762280 |
| H | -1.0150460 | 3.0096800  | 5.5902000  | C | -4.2339870 | 1.9598980  | 1.2079910  | C | 0.2104170  | -2.2439400 | -5.1737990 |
| C | -0.3855010 | 2.0106630  | 3.8211840  | C | -3.3363860 | 3.8965200  | 1.3522730  | C | -0.8248930 | -2.5054540 | -4.2845190 |
| C | 0.4487920  | 0.8068990  | 1.8418480  | C | -2.2780750 | 4.6280390  | 1.8863310  | H | -1.7053200 | -3.0522340 | -4.6119280 |
| H | -0.1330900 | 1.5557730  | 1.3180480  | H | -2.2029660 | 5.6863200  | 1.6477180  | C | -0.7791510 | -2.0476920 | -2.9619520 |
| H | -0.0096850 | -0.1769170 | 1.7086610  | C | -1.2975240 | 4.0309320  | 2.6779880  | C | 2.3662230  | 0.0963690  | -3.1574070 |
| H | 1.4612400  | 0.7664380  | 1.4416830  | C | -2.6452180 | 0.3978130  | 2.6961680  | C | 3.6479250  | -0.2220880 | -2.6798000 |
| C | 2.1352830  | -0.6979320 | 3.4440190  | H | -1.7396760 | 0.0155210  | 3.1818910  | C | 4.5235350  | 0.8138170  | -2.3707040 |
| C | 3.3765420  | -0.5162630 | 2.8158860  | C | -2.8360610 | -0.3793950 | 1.3862640  | H | 5.5025850  | 0.5872810  | -1.9555160 |
| C | 4.0238340  | -1.6424240 | 2.3127640  | H | -3.8080390 | -0.1525050 | 0.9325460  | C | 4.1587240  | 2.1537820  | -2.5268700 |
| H | 4.9852100  | -1.5335920 | 1.8180330  | H | -2.8074370 | -1.4579820 | 1.5680960  | C | 2.9024020  | 2.4432370  | -3.0499310 |
| C | 3.4440490  | -2.9093070 | 2.3706960  | H | -2.0578520 | -0.1526740 | 0.6505810  | H | 2.6242350  | 3.4843500  | -3.2007770 |
| C | 2.1967700  | -3.0503290 | 2.9758630  | C | -3.8077030 | 0.1525570  | 3.6676260  | C | 1.9896610  | 1.4338490  | -3.3653830 |
| H | 1.7381880  | -4.0357970 | 3.0037740  | H | -3.6601500 | 0.6831420  | 4.6146760  | C | 4.0707940  | -2.1677860 | -2.4946030 |
| C | 1.5197950  | -1.9607770 | 3.5170440  | H | -3.9023180 | -0.9176100 | 3.8802060  | H | 3.1578120  | -2.2698210 | -2.4256110 |
| C | 4.0028520  | 0.8577920  | 2.6430200  | H | -4.7525640 | 0.4948980  | 3.2315350  | C | 4.8708330  | -2.1456310 | -3.7129710 |
| H | 3.2304710  | 1.6149580  | 2.8444170  | C | -4.3230350 | 4.5320840  | 0.4334630  | H | 4.2853490  | -2.0569130 | -4.6337960 |
| C | 4.4944080  | 1.0720560  | 1.2046500  | C | -5.6647770 | 4.6726620  | 0.8239660  | H | 5.1688190  | -3.1930640 | -3.5943980 |
| H | 5.3616260  | 0.4382080  | 0.9881410  | C | -6.5687810 | 5.2552210  | -0.0630590 | H | 5.7793850  | -1.5432590 | -3.8329390 |
| H | 4.8097130  | 2.1107020  | 1.0575480  | H | -7.6058790 | 5.3751800  | 0.2442740  | C | 4.8558890  | -1.8923580 | -1.2025630 |
| H | 3.7164190  | 0.8249550  | 0.4718930  | C | -6.1786990 | 5.6862760  | -1.3298560 | H | 5.8306000  | -1.3900550 | -1.2243760 |
| C | 5.1343920  | 1.0690530  | 3.6559320  | C | -4.8420880 | 5.5366880  | -1.6948790 | H | 5.0413300  | -2.9612280 | -1.0500220 |
| H | 4.7734940  | 0.9776920  | 4.6862740  | H | -4.5196410 | 5.8675590  | -2.6801960 | H | 4.2784480  | -1.5118000 | -0.3549310 |
| H | 5.5839720  | 2.0592930  | 3.5321370  | C | -3.9018800 | 4.9708960  | -0.8340100 | C | 5.0816710  | 3.2431110  | -2.0983540 |
| H | 5.9190400  | 0.3188880  | 3.5081290  | C | -6.1335710 | 4.2227820  | 2.1873970  | C | 4.6983990  | 4.1274280  | -1.0747190 |
| C | 4.1127350  | -4.0830270 | 1.7395460  | H | -6.1952590 | 3.1309590  | 2.2544280  | C | 5.5932080  | 5.1170470  | -0.6581910 |
| C | 3.5699550  | -4.6213040 | 0.5580280  | H | -7.1265730 | 4.6244870  | 2.4038270  | H | 5.2954890  | 5.7901970  | 0.1442540  |
| C | 4.2126450  | -5.7077360 | -0.0345740 | H | -5.4484670 | 4.5526380  | 2.9744060  | C | 6.8474430  | 5.2678820  | -1.2396770 |
| H | 3.8044980  | -6.1186060 | -0.9562700 | C | -7.1814990 | 6.2725530  | -2.2906760 | C | 7.2031680  | 4.3922110  | -2.2659210 |
| C | 5.3644430  | -6.2733370 | 0.5131770  | H | -8.0015340 | 6.7624800  | -1.7585850 | H | 8.1756840  | 4.5009060  | -2.7435740 |
| C | 5.8803020  | -5.7208590 | 1.6832090  | H | -7.6182190 | 5.4912940  | -2.9227410 | C | 6.3474290  | 3.3839300  | -2.7019180 |
| H | 6.7786220  | -6.1484420 | 2.1244200  | H | -6.7146790 | 7.0074790  | -2.9521750 | C | 3.3446230  | 4.0475780  | -0.4045980 |
| C | 5.2727790  | -4.6301030 | 2.3061770  | C | -2.4649980 | 4.8351390  | -1.2804210 | H | 2.6012250  | 4.6521590  | -0.9387580 |
| C | 2.3480930  | -4.0120890 | -0.0829130 | H | -1.8264010 | 5.6017760  | -0.8260160 | H | 3.4079090  | 4.4365790  | 0.6172000  |
| H | 1.4460060  | -4.1567350 | 0.5203230  | H | -2.3890590 | 4.9457810  | -2.3653880 | H | 2.9587990  | 3.0250550  | -0.3715990 |
| H | 2.1673210  | -4.4591280 | -1.0660730 | H | -2.0452990 | 3.8615670  | -1.0092980 | C | 7.7941160  | 6.3537920  | -0.7943080 |
| H | 2.4475390  | -2.9271520 | -0.2037560 | C | -0.1056270 | 4.8710240  | 3.1134200  | H | 7.9131440  | 7.1161750  | -1.5719770 |
| C | 6.0173590  | -7.4672520 | -0.1362490 | H | 0.5891670  | 4.2383300  | 3.6761040  | H | 8.7887830  | 5.9497620  | -0.5806790 |
| H | 5.4896970  | -8.3919610 | 0.1231280  | C | 0.6544230  | 5.3899090  | 1.8852080  | H | 7.4295120  | 6.8518670  | 0.1080450  |
| H | 7.0561470  | -7.5766000 | 0.1867080  | H | 0.9307990  | 4.5680010  | 1.2174210  | C | 6.7848540  | 2.4798360  | -3.8306160 |
| H | 6.0058980  | -7.3797760 | -1.2265850 | H | 1.5676280  | 5.9105820  | 2.1913840  | H | 7.1236620  | 1.5049300  | -3.4639080 |
| C | 5.8594850  | -4.0619220 | 3.5763750  | H | 0.0426730  | 6.0951080  | 1.3127070  | H | 7.6134290  | 2.9325100  | -4.3818920 |
| H | 6.3074550  | -3.0760580 | 3.4094790  | C | -0.5293090 | 6.0242560  | 4.0291830  | H | 5.9639120  | 2.2886810  | -4.5270890 |
| H | 6.6380040  | -4.7199900 | 3.9705780  | H | -1.2117650 | 6.7054130  | 3.5105030  | C | 0.6398130  | 1.8235920  | -3.9511050 |
| H | 5.0916460  | -3.9355550 | 4.3463200  | H | 0.3445420  | 6.6022710  | 4.3456340  | H | 0.0186230  | 0.9254930  | -4.0182480 |
| C | 0.1458520  | -2.1699440 | 4.1358300  | H | -1.0427650 | 5.6576940  | 4.9239960  | C | -0.1149960 | 2.8235850  | -3.0703450 |
| H | -0.2994380 | -1.1898910 | 4.3509260  | S | 0.4511540  | -0.8093210 | -0.8154920 | H | -0.2561840 | 2.4083780  | -2.0681130 |
| C | -0.7969130 | -2.8938300 | 3.1657490  | O | 1.8813410  | -0.6386980 | -0.4792740 | H | -1.0996350 | 3.0299810  | -3.5076450 |

|   |            |            |            |   |             |            |            |   |            |            |            |
|---|------------|------------|------------|---|-------------|------------|------------|---|------------|------------|------------|
| H | 0.4173660  | 3.7798690  | -2.9931360 | H | -3.0572060  | -0.6658650 | -4.8033510 | H | -4.2841320 | -3.6410600 | 1.5885570  |
| C | 0.8178120  | 2.3629580  | -5.3758890 | H | -3.2428070  | 1.0941420  | -4.6636780 | H | -5.6011490 | -3.4885810 | 2.7708980  |
| H | 1.4331140  | 3.2700670  | -5.3757650 | H | -4.5315100  | 0.0156030  | -4.0914870 | H | -5.0062290 | -2.0684670 | 1.8946140  |
| H | -0.1534450 | 2.6113250  | -5.8175890 | C | -5.9409860  | -3.1820310 | -0.6327860 | C | -1.1850610 | -4.5699700 | -1.4720170 |
| H | 1.3090120  | 1.6240950  | -6.0173970 | C | -6.9357110  | -3.3647520 | -1.6116130 | H | -0.2320470 | -4.0801940 | -1.6980350 |
| C | -2.0266950 | -2.2623630 | -2.1492930 | C | -8.2251270  | -3.7186790 | -1.2177510 | C | -1.4180920 | -5.6852550 | -2.4973930 |
| C | -3.0148200 | -1.2605660 | -2.1346670 | H | -8.9889420  | -3.8613130 | -1.9803290 | H | -2.3777360 | -6.1828960 | -2.3151270 |
| C | -4.2673180 | -1.5665460 | -1.5919620 | C | -8.5581810  | -3.9043840 | 0.1230610  | H | -0.6271300 | -6.4406340 | -2.4339040 |
| H | -5.0561500 | -0.8170860 | -1.6075340 | C | -7.5605100  | -3.7226820 | 1.0770340  | H | -1.4314110 | -5.2898740 | -3.5178560 |
| C | -4.5564150 | -2.8249440 | -1.0685910 | H | -7.8005730  | -3.8593940 | 2.1299810  | C | -1.0709430 | -5.1422990 | -0.0567810 |
| C | -3.5363820 | -3.7771350 | -1.0344170 | C | -6.2582500  | -3.3664010 | 0.7224170  | H | -0.9206510 | -4.3284660 | 0.6584400  |
| H | -3.7528730 | -4.7579760 | -0.6155420 | C | -6.6192650  | -3.2017030 | -3.0791500 | H | -0.2203320 | -5.8300740 | 0.0065050  |
| C | -2.2702680 | -3.5104620 | -1.5517080 | H | -6.4371790  | -2.1537650 | -3.3396920 | H | -1.9688710 | -5.7021710 | 0.2284650  |
| C | -2.7943180 | 0.1027640  | -2.7787670 | H | -7.4469370  | -3.5645770 | -3.6941530 | H | 0.7329760  | 1.9311420  | 7.0268610  |
| H | -1.7175010 | 0.2491090  | -2.8989340 | H | -5.7138540  | -3.7536800 | -3.3500350 | H | 0.1606500  | -2.6141580 | -6.1933010 |
| C | -3.2859580 | 1.2662890  | -1.9123610 | C | -9.9513600  | -4.3215500 | 0.5216320  | C | 0.2560210  | -2.9173600 | 5.4699570  |
| H | -4.3535590 | 1.1924600  | -1.6739560 | H | -10.7059190 | -3.8251910 | -0.0957090 | H | -0.7346140 | -3.0625690 | 5.9126610  |
| H | -3.1417860 | 2.2117800  | -2.4477910 | H | -10.1539220 | -4.0789620 | 1.5684180  | H | 0.7080540  | -3.9033550 | 5.3188960  |
| H | -2.7130750 | 1.3109920  | -0.9811500 | H | -10.0883150 | -5.4020010 | 0.3998120  | H | 0.8787260  | -2.3698460 | 6.1857160  |
| C | -3.4440840 | 0.1374650  | -4.1678740 | C | -5.2309770  | -3.1366660 | 1.8038060  |   |            |            |            |





|   |            |            |            |   |            |            |            |   |            |            |            |
|---|------------|------------|------------|---|------------|------------|------------|---|------------|------------|------------|
| H | 6.3199470  | -0.9652910 | -2.6783660 | H | 0.4552470  | 4.7427330  | -3.6957280 | C | -3.1434370 | -5.9448560 | 0.4829290  |
| H | 5.6705930  | -0.1216790 | -1.2756570 | H | -1.0854860 | 3.8599050  | -3.7108260 | H | -2.3808420 | -6.6279330 | 0.0934320  |
| C | 5.0499160  | 0.4701670  | -4.6328670 | H | 0.3391390  | 3.1788510  | -4.5217590 | H | -3.9451930 | -6.5560540 | 0.9117360  |
| H | 4.1797130  | 0.6346070  | -5.2732300 | C | -0.7509210 | -2.2534580 | -2.1786850 | H | -2.6852620 | -5.3569660 | 1.2838780  |
| H | 5.5596690  | -0.4373220 | -4.9779450 | C | -0.4346250 | -3.6185580 | -2.0652200 | C | -4.2611830 | -5.8818560 | -1.7725940 |
| H | 5.7349050  | 1.3152110  | -4.7693380 | C | -1.3832660 | -4.4950060 | -1.5398540 | H | -4.6711350 | -5.2446720 | -2.5618940 |
| C | 4.9120130  | 5.0418900  | -1.3057700 | H | -1.1273530 | -5.5495140 | -1.4510390 | H | -5.0565960 | -6.5447860 | -1.4133890 |
| H | 5.9685470  | 4.7530200  | -1.3854360 | C | -2.6480360 | -4.0639920 | -1.1404480 | H | -3.4749900 | -6.5021200 | -2.2179080 |
| C | 4.6132140  | 5.3408140  | 0.1681110  | C | -2.9393410 | -2.7087580 | -1.2612820 | C | -2.3858630 | -0.3236360 | -1.8071820 |
| H | 3.5694440  | 5.6494730  | 0.2951460  | H | -3.9223300 | -2.3493920 | -0.9519380 | H | -1.4781200 | 0.2568850  | -1.9792240 |
| H | 5.2522600  | 6.1499710  | 0.5399030  | C | -2.0083620 | -1.7930670 | -1.7597920 | C | -3.3708770 | -0.0259070 | -2.9420570 |
| H | 4.7741860  | 4.4545500  | 0.7910250  | C | 0.9168770  | -4.1695300 | -2.4846080 | H | -2.9317410 | -0.2550630 | -3.9183780 |
| C | 4.7025680  | 6.2938120  | -2.1646910 | H | 1.5123630  | -3.3344130 | -2.8698840 | H | -3.6594100 | 1.0330400  | -2.9358070 |
| H | 4.9295530  | 6.0913270  | -3.2153600 | C | 0.7736280  | -5.2017710 | -3.6093270 | H | -4.2817910 | -0.6274930 | -2.8291730 |
| H | 5.3446290  | 7.1123310  | -1.8217600 | H | 0.1743320  | -6.0586630 | -3.2820500 | C | -2.9523450 | 0.1209510  | -0.4526790 |
| H | 3.6633310  | 6.6356520  | -2.1057610 | H | 1.7547320  | -5.5819010 | -3.9153420 | H | -4.0333870 | -0.0509280 | -0.3832970 |
| C | 0.3989740  | 3.0389170  | -2.3441120 | H | 0.2851950  | -4.7661020 | -4.4870610 | H | -2.7474750 | 1.1831180  | -0.2775620 |
| H | -0.0483640 | 2.0419860  | -2.3470640 | C | 1.6610410  | -4.7551800 | -1.2811990 | H | -2.4803250 | -0.4449720 | 0.3515030  |
| C | -0.1755510 | 3.7712860  | -1.1301360 | H | 1.8079470  | -3.9816390 | -0.5221440 | H | 0.6185420  | -0.5585020 | -6.2170290 |
| H | 0.2124930  | 3.3294690  | -0.2095240 | H | 2.6450920  | -5.1350920 | -1.5803860 | H | -1.4206030 | -0.9363910 | 7.4865260  |
| H | -1.2686450 | 3.6793880  | -1.1216430 | H | 1.0974710  | -5.5846890 | -0.8367870 | H | -7.3663320 | 2.1418700  | 1.8391270  |
| H | 0.0634250  | 4.8413580  | -1.1444990 | C | -3.6891680 | -5.0393810 | -0.6256870 | H | 5.9048820  | -2.3387680 | 2.8105390  |
| C | 0.0033140  | 3.7450780  | -3.6470790 | H | -4.5106580 | -4.4435430 | -0.2042910 |   |            |            |            |





|   |            |            |            |   |             |            |           |   |             |            |            |
|---|------------|------------|------------|---|-------------|------------|-----------|---|-------------|------------|------------|
| H | -8.5394900 | -3.2029810 | -1.7462470 | H | -5.5049620  | -5.4337420 | 4.0023370 | H | -8.0368250  | 1.4330300  | 2.6667300  |
| H | -5.9341960 | -3.2888680 | -1.7851800 | H | -4.8286280  | -4.1799610 | 2.9519830 | H | -6.8245360  | -3.7653820 | 0.1276660  |
| H | -5.8733030 | -2.0496710 | -3.0343610 | H | -6.8814960  | -5.1913000 | 1.9271260 | H | -7.7307150  | -2.0973150 | 3.9900220  |
| H | -5.0024060 | -1.8125900 | -1.5087190 | H | -9.9221520  | -0.5781630 | 4.0714170 | H | -10.0927990 | 0.3231660  | 0.9093380  |
| H | -7.1189460 | -0.4460580 | -1.6579030 | H | -10.1519320 | 1.1652710  | 3.8921370 | H | -10.6899680 | 1.2099830  | -0.5353830 |
| H | -9.1441070 | -4.6850730 | 3.0570300  | H | -10.2494740 | 0.0831100  | 2.4842440 | H | -9.7507900  | -0.3077140 | -0.7343840 |
| H | -8.1471400 | -5.9119330 | 3.8701060  | H | -6.3461150  | 0.6301940  | 4.3675640 | H | -7.2907850  | 4.4200110  | -1.0786070 |
| H | -8.2592400 | -4.2801800 | 4.5340760  | H | -7.7383080  | 1.4504740  | 5.0965410 | H | -5.3233460  | 1.0870570  | 0.8479590  |
| H | -5.7336040 | -3.7287650 | 4.4006510  | H | -7.6105290  | -0.3035590 | 5.1761440 |   |             |            |            |

### 3.3 Crystallographic data

*General procedure.* The measurements for compound **10** were made on a *Rigaku Oxford Diffraction Xta-LAB Synergy-S* diffractometer fitted with a *HyPix 6000HE* hybrid pixel array detector using  $\text{Cu K}\alpha$  radiation ( $\lambda = 1.54184 \text{ \AA}$ ) from a *PhotonJet* micro-focus X-ray source and an *Oxford Cryosystems Cryostream 800+* cooler. For all other compounds, the measurements were made on an a *Rigaku Oxford Diffraction Super-Nova* diffractometer fitted with an Atlas CCD area-detector using  $\text{Cu K}\alpha$  radiation from a micro-focus X-ray source and an *Oxford Instruments Cryojet XL* cooler. Data reduction was performed with *CrysAlisPro*.<sup>34a-d</sup> The intensities were corrected for Lorentz and polarization effects, and usually an empirical absorption correction using spherical harmonics<sup>34</sup> was applied. Where explicitly mentioned below, a numerical absorption correction<sup>35</sup> was applied instead. The space groups were determined from the systematic absences, packing considerations, a statistical analysis of intensity distribution, and the successful solution and refinement of the structures. Equivalent reflections, other than Friedel pairs for the structures with non-centrosymmetric space groups, were merged. The structures were solved by dual space methods using the *SHELXT-2014* or *SHELXT-2018* programs,<sup>36</sup> which revealed the positions of all non-hydrogen atoms. The non-hydrogen atoms were refined anisotropically. Unless otherwise stated below, all of the H-atoms were placed in geometrically calculated positions and refined by using a riding model where each H-atom was assigned a fixed isotropic displacement parameter with a value equal to  $1.2U_{\text{eq}}$  of its parent atom ( $1.5U_{\text{eq}}$  for the methyl groups and any water H-atoms). The refinement of each structure was carried out on  $F^2$  by using full-matrix least-squares procedures, which minimised the function  $\sum w(F_o^2 - F_c^2)^2$ . Neutral atom scattering factors for non-hydrogen atoms were taken from Maslen, Fox and O'Keefe,<sup>37</sup> and the scattering factors for H-atoms were taken from Stewart, Davidson and Simpson.<sup>38</sup> Anomalous dispersion effects were included in  $F_c$ <sup>39</sup>; the values for  $f'$  and  $f''$  were those of Creagh and McAuley.<sup>40</sup> The values of the mass attenuation coefficients are those of Creagh and Hubbel.<sup>41</sup> The *SHELXL-2014* or *SHELXL-2018* programs<sup>42</sup> were used for all calculations. Displacement ellipsoid plots of the molecules are drawn with 50% probability ellipsoids<sup>43,44</sup> hydrogen atoms are omitted for clarity; the colour codes are: gray, carbon; red, oxygen; blue, nitrogen; sea green, palladium; yellow green, fluorine; pink, boron.

## Crystal structure of $C3^+BF_4^-$

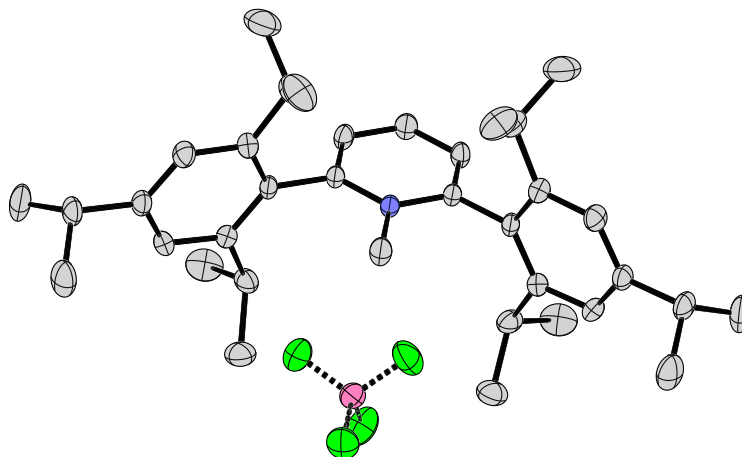

In the structure of  $C3^+BF_4^-$  ( $C_{36}H_{52}N^+BF_4^-$ ), the unique cation and anion sit across a mirror plane. The methyl H-atoms of the methylamine group are disordered across the mirror and necessarily have equal site occupation. The anion is disordered over four orientations, defined as two mirror-related pairs. Two sets of positions were defined for all atoms of the anion and the site occupation factor of the major conformation refined to 0.342(2). The minor conformation occupancy is 0.158(2) and then the mirror-related orientations duplicate these. Similarity restraints were applied to all B–F bond lengths and F...F distances within the anion, while neighbouring atoms within and between each orientation of the disordered anion were restrained to have similar atomic displacement parameters. These orientations of the anion approximate a "spinning top" type disorder where the four positions of one F-atom and the B-atom are almost on identical sites across all orientations, while the remaining three F-atoms are approximating a toroidal ring of electron density.

### Crystallographic data

|                                            |                                |
|--------------------------------------------|--------------------------------|
| Crystallised from                          | EtOAc                          |
| Empirical formula                          | $C_{36}H_{52}BF_4N$            |
| Formula weight [ $g\ mol^{-1}$ ]           | 585.59                         |
| Crystal colour, habit                      | colourless, prism              |
| Crystal dimensions [mm]                    | $0.04 \times 0.06 \times 0.10$ |
| Temperature [K]                            | 160(1)                         |
| Crystal system                             | orthorhombic                   |
| Space group                                | $Pnma$ (#62)                   |
| Z                                          | 4                              |
| Reflections for cell determination         | 14705                          |
| $2\theta$ range for cell determination [°] | 7–149                          |
| Unit cell parameters $a$ [Å]               | 12.1344(2)                     |

|  |                                               |                                                                                     |
|--|-----------------------------------------------|-------------------------------------------------------------------------------------|
|  | $b$ [Å]                                       | 25.1177(4)                                                                          |
|  | $c$ [Å]                                       | 11.0932(2)                                                                          |
|  | $\alpha$ [°]                                  | 90                                                                                  |
|  | $\beta$ [°]                                   | 90                                                                                  |
|  | $\gamma$ [°]                                  | 90                                                                                  |
|  | $V$ [Å <sup>3</sup> ]                         | 3381.08(10)                                                                         |
|  | $F(000)$                                      | 1264                                                                                |
|  | $D_x$ [g cm <sup>-3</sup> ]                   | 1.150                                                                               |
|  | $\mu(\text{Cu } K\alpha)$ [mm <sup>-1</sup> ] | 0.648                                                                               |
|  | Scan type                                     | $\omega$                                                                            |
|  | $2\theta_{(\text{max})}$ [°]                  | 148.5                                                                               |
|  | Transmission factors (min; max)               | 0.892; 1.000                                                                        |
|  | Total reflections measured                    | 32180                                                                               |
|  | Symmetry independent reflections              | 3515                                                                                |
|  | $R_{\text{int}}$                              | 0.025                                                                               |
|  | Reflections with $I > 2\sigma(I)$             | 3160                                                                                |
|  | Reflections used in refinement                | 3515                                                                                |
|  | Parameters refined; restraints                | 270; 255                                                                            |
|  | Final $R(F)$ [ $I > 2\sigma(I)$ reflections]  | 0.0551                                                                              |
|  | $wR(F^2)$ (all data)                          | 0.1582                                                                              |
|  | Weights:                                      | $w = [\sigma^2(F_o^2) + (0.0703P)^2 + 2.3425P]^{-1}$ where $P = (F_o^2 + 2F_c^2)/3$ |
|  | Goodness of fit                               | 1.127                                                                               |
|  | Final $\Delta_{\text{max}}/\sigma$            | 0.000                                                                               |
|  | $\Delta\rho$ (max; min) [e Å <sup>-3</sup> ]  | 0.24; -0.25                                                                         |
|  | $\sigma(d_{(\text{c-c})})$ [Å]                | 0.0019 – 0.003                                                                      |



## Crystal structure of $C4^+BF_4^-$

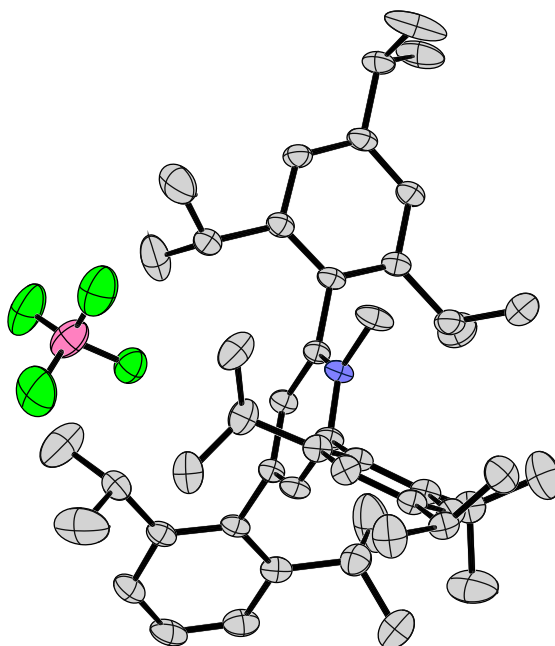

The anion in the crystal structure of  $C4^+BF_4^-$  ( $C_{48}H_{68}N^+ BF_4^-$ ) is disordered over two orientations which are approximately mirror-related. Two sets of positions were defined for all atoms of the anion and the site occupation factor of the major orientation refined to 0.660(3). Similarity restraints were applied to all B–F bond lengths, while neighboring atoms within and between each orientation of the disordered anion were restrained to have similar atomic displacement parameters. A correction for secondary extinction was applied.

### Crystallographic data:

|                                            |                                |
|--------------------------------------------|--------------------------------|
| Crystallised from                          | $CH_2Cl_2$ / iPrOH             |
| Empirical formula                          | $C_{48}H_{68}BF_4N$            |
| Formula weight [ $g\ mol^{-1}$ ]           | 745.84                         |
| Crystal colour, habit                      | colourless, needle             |
| Crystal dimensions [mm]                    | $0.03 \times 0.06 \times 0.18$ |
| Temperature [K]                            | 160(1)                         |
| Crystal system                             | triclinic                      |
| Space group                                | $P\bar{1}$ (#2)                |
| Z                                          | 2                              |
| Reflections for cell determination         | 21858                          |
| $2\theta$ range for cell determination [°] | 6–149                          |

|                                               |                                                                                     |                |
|-----------------------------------------------|-------------------------------------------------------------------------------------|----------------|
| Unit cell parameters                          | $a$ [Å]                                                                             | 11.4195(3)     |
|                                               | $b$ [Å]                                                                             | 13.2952(3)     |
|                                               | $c$ [Å]                                                                             | 15.0834(3)     |
|                                               | $\alpha$ [°]                                                                        | 95.3682(19)    |
|                                               | $\beta$ [°]                                                                         | 101.1467(19)   |
|                                               | $\gamma$ [°]                                                                        | 93.8514(19)    |
|                                               | $V$ [Å <sup>3</sup> ]                                                               | 2228.44(9)     |
| $F(000)$                                      |                                                                                     | 808            |
| $D_x$ [g cm <sup>-3</sup> ]                   |                                                                                     | 1.112          |
| $\mu(\text{Cu } K\alpha)$ [mm <sup>-1</sup> ] |                                                                                     | 0.589          |
| Scan type                                     |                                                                                     | $\omega$       |
| $2\theta_{(\text{max})}$ [°]                  |                                                                                     | 148.7          |
| Transmission factors (min; max)               |                                                                                     | 0.904; 1.000   |
| Total reflections measured                    |                                                                                     | 41871          |
| Symmetry independent reflections              |                                                                                     | 8819           |
| $R_{\text{int}}$                              |                                                                                     | 0.019          |
| Reflections with $I > 2\sigma(I)$             |                                                                                     | 7704           |
| Reflections used in refinement                |                                                                                     | 8819           |
| Parameters refined; restraints                |                                                                                     | 551; 52        |
| Final $R(F)$ [ $I > 2\sigma(I)$ reflections]  |                                                                                     | 0.0467         |
|                                               | $wR(F^2)$ (all data)                                                                | 0.1287         |
| Weights:                                      | $w = [\sigma^2(F_o^2) + (0.0621P)^2 + 0.8820P]^{-1}$ where $P = (F_o^2 + 2F_c^2)/3$ |                |
| Goodness of fit                               |                                                                                     | 1.034          |
| Secondary extinction coefficient              |                                                                                     | 0.0006(2)      |
| Final $\Delta_{\text{max}}/\sigma$            |                                                                                     | 0.001          |
| $\Delta\rho$ (max; min) [e Å <sup>-3</sup> ]  |                                                                                     | 0.39; -0.33    |
| $\sigma(d_{(c-c)})$ [Å]                       |                                                                                     | 0.0015 – 0.002 |

## Crystal structure of $C5^+BF_4^-$

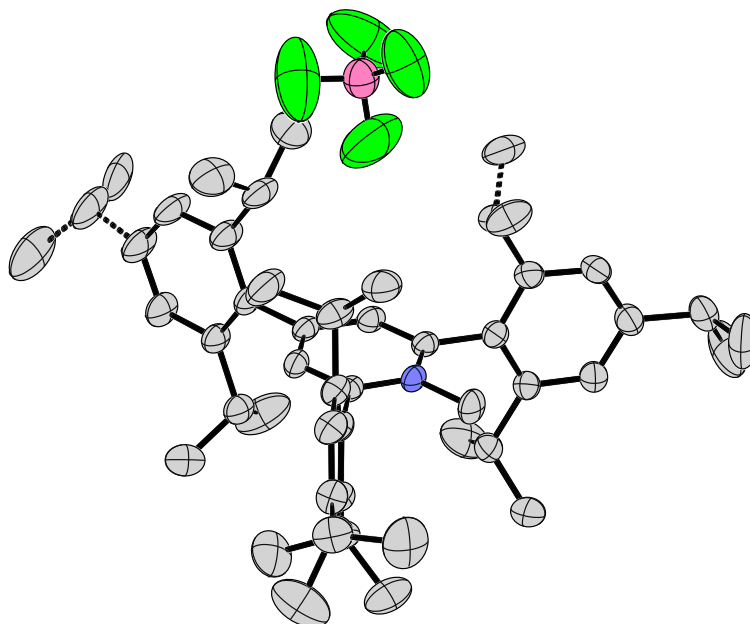

The asymmetric unit of  $C5^+BF_4^-$  ( $C_{51}H_{74}N^+ BF_4^- \cdot C_7H_{16}$ ) contains one half of a cation, one half of an anion and one half of a disordered solvent molecule, estimated to be *n*-heptane. Each of these entities lie across crystallographic mirror planes. The disordered solvent molecule could not be modelled adequately, so its contribution to the diffraction data was removed using the *SQUEEZE* routine of the program *PLATON*.<sup>45</sup> When the solvent molecule is excluded from the model, there are four cavities of  $233 \text{ \AA}^3$  per unit cell. The total number of electrons contributing to each void was calculated by the *SQUEEZE* routine to be approximately 54 e. An *n*-heptane molecule has 58 e, which suggests that each cavity has one molecule of *n*-heptane, rather than the other solvent used, which was benzene (42 e). This approximation was used in the subsequent calculation of the empirical formula, formula weight, density, linear absorption coefficient and  $F(000)$ . Based on the assumption, the overall ratio of cations to anions and *n*-heptane molecules is 1:1:1. Two of the symmetry-unique *i*Pr groups are disordered over two conformations, one of which is disordered across the mirror plane. The site occupation factors of the unique atoms of the *i*Pr group disordered across the mirror plane were fixed at 0.5. Two sets of positions were defined for the atoms of the other disordered *i*Pr group and the site occupation factor of the major conformation refined to 0.650(11). Similarity restraints were applied to the chemically equivalent bond lengths involving all disordered C-atoms, while neighbouring atoms within and between each of the disordered conformations were restrained to have similar atomic displacement parameters. A numerical absorption correction was applied.

### Crystallographic data:

|                                        |                             |
|----------------------------------------|-----------------------------|
| Crystallised from                      | benzene / <i>n</i> -heptane |
| Empirical formula                      | $C_{58}H_{90}BF_4N$         |
| Formula weight [ $\text{g mol}^{-1}$ ] | 888.11                      |

|                                                                               |                    |
|-------------------------------------------------------------------------------|--------------------|
| Crystal colour, habit                                                         | colourless, prism  |
| Crystal dimensions [mm]                                                       | 0.14 × 0.17 × 0.43 |
| Temperature [K]                                                               | 160(1)             |
| Crystal system                                                                | orthorhombic       |
| Space group                                                                   | <i>Pnma</i> (#62)  |
| Z                                                                             | 4                  |
| Reflections for cell determination                                            | 16310              |
| 2 $\theta$ range for cell determination [°]                                   | 7–146              |
| Unit cell parameters                                                          |                    |
| <i>a</i> [Å]                                                                  | 17.99832(15)       |
| <i>b</i> [Å]                                                                  | 20.8154(2)         |
| <i>c</i> [Å]                                                                  | 14.54327(12)       |
| $\alpha$ [°]                                                                  | 90                 |
| $\beta$ [°]                                                                   | 90                 |
| $\gamma$ [°]                                                                  | 90                 |
| <i>V</i> [Å <sup>3</sup> ]                                                    | 5448.52(8)         |
| <i>F</i> (000)                                                                | 1944               |
| <i>D</i> <sub>x</sub> [g cm <sup>-3</sup> ]                                   | 1.083              |
| $\mu$ (Cu <i>K</i> $\alpha$ ) [mm <sup>-1</sup> ]                             | 0.549              |
| Scan type                                                                     | $\omega$           |
| 2 $\theta$ <sub>(max)</sub> [°]                                               | 146.3              |
| Transmission factors (min; max)                                               | 0.549; 1.000       |
| Total reflections measured                                                    | 27340              |
| Symmetry independent reflections                                              | 5528               |
| <i>R</i> <sub>int</sub>                                                       | 0.019              |
| Reflections with <i>I</i> > 2 $\sigma$ ( <i>I</i> )                           | 4852               |
| Reflections used in refinement                                                | 5528               |
| Parameters refined; restraints                                                | 324; 63            |
| Final <i>R</i> ( <i>F</i> ) [ <i>I</i> > 2 $\sigma$ ( <i>I</i> ) reflections] | 0.0722             |

|                                                  |                                                                                     |
|--------------------------------------------------|-------------------------------------------------------------------------------------|
| $wR(F^2)$ (all data)                             | 0.2169                                                                              |
| Weights:                                         | $w = [\sigma^2(F_o^2) + (0.1102P)^2 + 3.3647P]^{-1}$ where $P = (F_o^2 + 2F_c^2)/3$ |
| Goodness of fit                                  | 1.064                                                                               |
| Final $\Delta_{\max}/\sigma$                     | 0.000                                                                               |
| $\Delta\rho$ (max; min) [ $e \text{ \AA}^{-3}$ ] | 0.75; -0.56                                                                         |
| $\sigma(d_{(c-c)})$ [ $\text{\AA}$ ]             | 0.002 – 0.004                                                                       |

## Crystal structure of $C7^+BF_4^-$

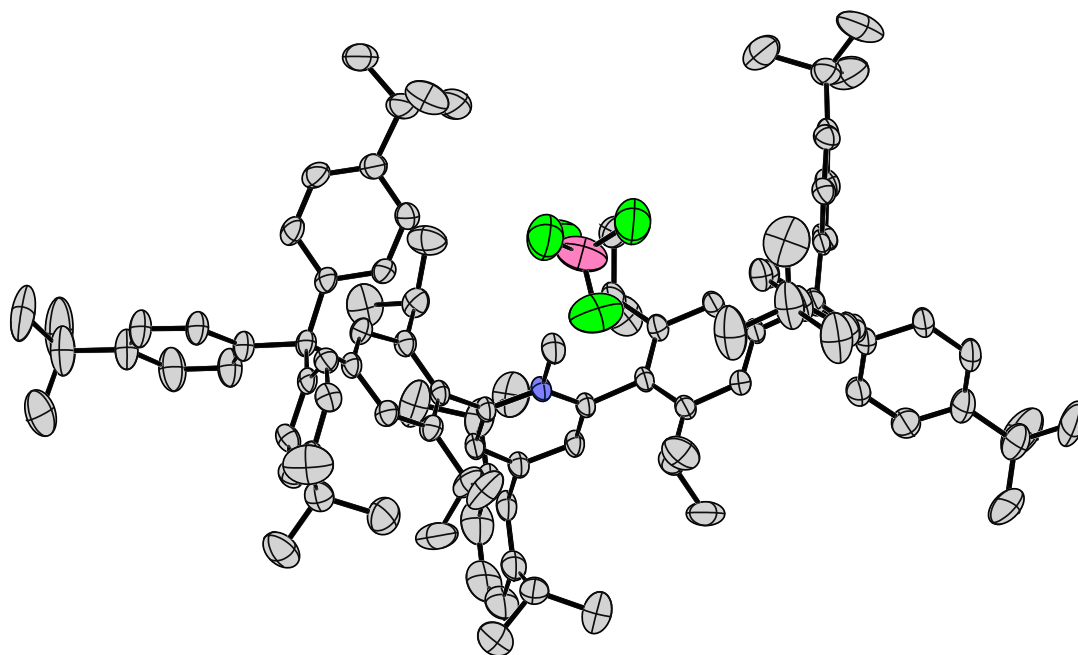

The asymmetric unit of  $C7^+BF_4^-$  ( $C_{104}H_{132}N^+ BF_4^- \cdot 3CH_2Cl_2$ ) contains half of a cation and half of an anion, each of which sit across a  $C_2$ -axis, plus one and a half molecules of  $CH_2Cl_2$ , one of which is disordered across a centre of inversion. The F-atoms of the anion and one of the t-butyl groups of the cation are also disordered. Two sets of positions were defined for the symmetry-unique F-atoms and the atoms of the disordered t-butyl group and the site occupation factors of the major conformations of these groups refined to 0.683(4) and 0.673(8), respectively. Similarity restraints were applied to the chemically equivalent bond lengths involving all disordered F- and C-atoms, as well as the  $C_{methyl} \cdots C_{methyl}$  distances within the disordered t-butyl group. Neighbouring atoms within and between each conformation of the disordered groups were restrained to have similar atomic displacement parameters and pseudo-isotropic restraints were applied additionally to some t-butyl  $C_{methyl}$  atoms. Attempts to model the disordered  $CH_2Cl_2$  molecule led to unsatisfactory results, so the *SQUEEZE* routine of the program *PLATON*<sup>45</sup> was employed to account for this solvent molecule. Omission of the disordered  $CH_2Cl_2$  molecule leaves four cavities of  $96 \text{ \AA}^3$  and four of  $114 \text{ \AA}^3$  per unit cell, centred about centres of inversion. The total number of electrons contributing to the larger voids in the unit cell was calculated by the *SQUEEZE* routine to be approximately 31 e, although this can be an underestimate. A negligible electron count was assigned to the smaller voids. Allowing for one molecule of  $CH_2Cl_2$  per void yields 42 e and this approximation was used in the subsequent calculation of the empirical formula, formula weight, density, linear absorption coefficient and  $F(000)$ . Based on the assumption, the overall ratio of cation:anion: $CH_2Cl_2$  in the structure is 1:1:3.

### Crystallographic data:

|                                         |                           |
|-----------------------------------------|---------------------------|
| Crystallised from                       | $CH_2Cl_2$ /hexane        |
| Empirical formula                       | $C_{107}H_{138}BCl_6F_4N$ |
| Formula weight [ $g \text{ mol}^{-1}$ ] | 1737.69                   |

|                                                                               |                    |
|-------------------------------------------------------------------------------|--------------------|
| Crystal colour, habit                                                         | colourless, block  |
| Crystal dimensions [mm]                                                       | 0.28 × 0.31 × 0.35 |
| Temperature [K]                                                               | 160(1)             |
| Crystal system                                                                | monoclinic         |
| Space group                                                                   | <i>C2/c</i> (#15)  |
| <i>Z</i>                                                                      | 4                  |
| Reflections for cell determination                                            | 30803              |
| 2 $\theta$ range for cell determination [°]                                   | 7–146              |
| Unit cell parameters                                                          |                    |
| <i>a</i> [Å]                                                                  | 20.56989(16)       |
| <i>b</i> [Å]                                                                  | 15.92753(12)       |
| <i>c</i> [Å]                                                                  | 31.9108(2)         |
| $\alpha$ [°]                                                                  | 90                 |
| $\beta$ [°]                                                                   | 93.9468(6)         |
| $\gamma$ [°]                                                                  | 90                 |
| <i>V</i> [Å <sup>3</sup> ]                                                    | 10430.06(13)       |
| <i>F</i> (000)                                                                | 3720               |
| <i>D</i> <sub>x</sub> [g cm <sup>-3</sup> ]                                   | 1.107              |
| $\mu$ (Cu <i>K</i> $\alpha$ ) [mm <sup>-1</sup> ]                             | 1.893              |
| Scan type                                                                     | $\omega$           |
| 2 $\theta$ <sub>(max)</sub> [°]                                               | 146.0              |
| Transmission factors (min; max)                                               | 0.886; 1.000       |
| Total reflections measured                                                    | 49228              |
| Symmetry independent reflections                                              | 10211              |
| <i>R</i> <sub>int</sub>                                                       | 0.015              |
| Reflections with <i>I</i> > 2 $\sigma$ ( <i>I</i> )                           | 9268               |
| Reflections used in refinement                                                | 10211              |
| Parameters refined; restraints                                                | 592; 120           |
| Final <i>R</i> ( <i>F</i> ) [ <i>I</i> > 2 $\sigma$ ( <i>I</i> ) reflections] | 0.0712             |

|                                                  |                                                                                      |
|--------------------------------------------------|--------------------------------------------------------------------------------------|
| $wR(F^2)$ (all data)                             | 0.2129                                                                               |
| Weights:                                         | $w = [\sigma^2(F_0^2) + (0.1193P)^2 + 13.6373P]^{-1}$ where $P = (F_0^2 + 2F_C^2)/3$ |
| Goodness of fit                                  | 1.037                                                                                |
| Final $\Delta_{\max}/\sigma$                     | 0.001                                                                                |
| $\Delta\rho$ (max; min) [ $e \text{ \AA}^{-3}$ ] | 0.72; -0.62                                                                          |
| $\sigma(d_{(C-C)})$ [ $\text{\AA}$ ]             | 0.002 – 0.006                                                                        |



### Crystal structure of $\text{C8}^{2+}(\text{BF}_4^-)_2$

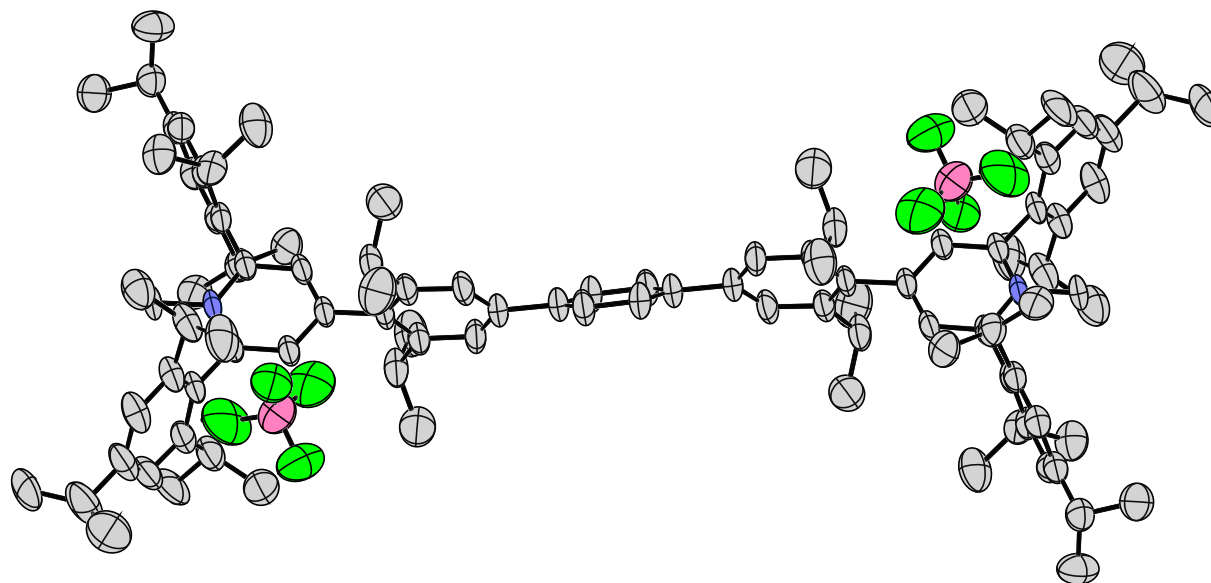

The asymmetric unit in the structure of  $\text{C8}^{2+}(\text{BF}_4^-)_2$  ( $\text{C}_{102}\text{H}_{138}\text{N}_2^{2+} 2\text{BF}_4^- \cdot 2\text{C}_7\text{H}_{14} \cdot 2\text{C}_6\text{D}_6$ ) contains one half of a cation, which sits about a crystallographic centre of inversion, one tetrafluoroborate anion and, at a rough estimate, one disordered molecule of deuterobenzene and one disordered molecule of *n*-heptane. An indication of which and how many solvent molecules were present could not be derived from the residual electron density peaks. The contribution of the solvent molecules to the diffraction data was removed using the *SQUEEZE* routine of the program *PLATON*.<sup>45</sup> When the solvent molecules are excluded from the model, there are two cavities of  $1584 \text{ \AA}^3$  per unit cell. The total number of electrons contributing to each void was calculated by the *SQUEEZE* routine to be approximately 386 e. A deuterobenzene molecule has 42 e and a *n*-heptane molecule has 58 e. If it is assumed that each cavity contains four of each of these molecules, there are 400 e per cavity (one of each solvent molecule or 100 e per asymmetric unit), which is fairly close to the electron count calculated by *SQUEEZE*. This approximation was used in the subsequent calculation of the empirical formula, formula weight, density, linear absorption coefficient and  $F(000)$ . Based on the assumption, the overall ratio of cation:anion:deuterobenzene:*n*-heptane is 1:2:2:2. Four *i*Pr groups in the symmetry-unique half of the cation, the central phenyl ring of the cation and the anion were modelled as disordered over two conformations. Two sets of positions were defined for the atoms of each disordered group and the site occupation factors of the major conformations of these groups refined to between 0.509(15) and 0.578(19) for the *i*Pr groups, to 0.756(4) for the central phenyl ring of the cation and to 0.705(3) for the anion. Similarity restraints were applied to the chemically equivalent bond lengths involving all disordered atoms, as well as to the F...F distances within the anion, while neighbouring atoms within and between each of the disordered conformations were restrained to have similar atomic displacement parameters. A numerical absorption correction was applied.

#### Crystallographic data:

|                   |                                                              |
|-------------------|--------------------------------------------------------------|
| Crystallised from | deuterobenzene / <i>n</i> -heptane                           |
| Empirical formula | $\text{C}_{128}\text{H}_{182}\text{B}_2\text{F}_8\text{N}_2$ |

|                                                     |                    |
|-----------------------------------------------------|--------------------|
| Formula weight [g mol <sup>-1</sup> ]               | 1922.37            |
| Crystal colour, habit                               | colourless, needle |
| Crystal dimensions [mm]                             | 0.06 × 0.09 × 0.33 |
| Temperature [K]                                     | 160(1)             |
| Crystal system                                      | monoclinic         |
| Space group                                         | <i>C2/c</i> (#15)  |
| Z                                                   | 4                  |
| Reflections for cell determination                  | 15613              |
| 2 $\theta$ range for cell determination [°]         | 6–144              |
| Unit cell parameters                                |                    |
| <i>a</i> [Å]                                        | 40.0822(9)         |
| <i>b</i> [Å]                                        | 11.1343(2)         |
| <i>c</i> [Å]                                        | 26.9243(7)         |
| $\alpha$ [°]                                        | 90                 |
| $\beta$ [°]                                         | 97.360(2)          |
| $\gamma$ [°]                                        | 90                 |
| <i>V</i> [Å <sup>3</sup> ]                          | 11917.0(5)         |
| <i>F</i> (000)                                      | 4184               |
| <i>D</i> <sub>x</sub> [g cm <sup>-3</sup> ]         | 1.071              |
| $\mu$ (Cu <i>K</i> $\alpha$ ) [mm <sup>-1</sup> ]   | 0.538              |
| Scan type                                           | $\omega$           |
| 2 $\theta$ <sub>(max)</sub> [°]                     | 144.8              |
| Transmission factors (min; max)                     | 0.765; 1.000       |
| Total reflections measured                          | 56841              |
| Symmetry independent reflections                    | 11514              |
| <i>R</i> <sub>int</sub>                             | 0.029              |
| Reflections with <i>I</i> > 2 $\sigma$ ( <i>I</i> ) | 8523               |
| Reflections used in refinement                      | 11514              |
| Parameters refined; restraints                      | 680; 376           |

|                                                  |                                                                           |
|--------------------------------------------------|---------------------------------------------------------------------------|
| Final $R(F)$ [ $I > 2\sigma(I)$ reflections]     | 0.0921                                                                    |
| $wR(F^2)$ (all data)                             | 0.3268                                                                    |
| Weights:                                         | $w = [\sigma^2(F_o^2) + (0.2000P)^2]^{-1}$ where $P = (F_o^2 + 2F_c^2)/3$ |
| Goodness of fit                                  | 1.345                                                                     |
| Final $\Delta_{\max}/\sigma$                     | 0.001                                                                     |
| $\Delta\rho$ (max; min) [ $e \text{ \AA}^{-3}$ ] | 1.05; -1.00                                                               |
| $\sigma(d_{(c-c)})$ [ $\text{\AA}$ ]             | 0.002 – 0.010                                                             |

## Crystal structure of $\text{C}_2^+\text{A}_4^-$

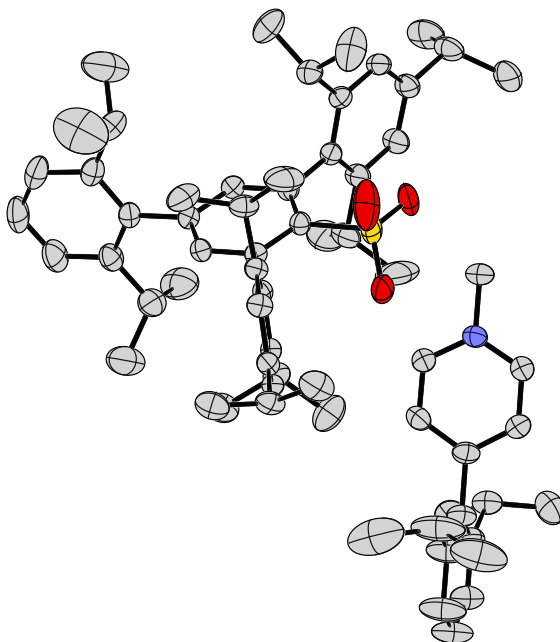

The asymmetric unit in the structure of  $\text{C}_2^+\text{A}_4^-$  ( $\text{C}_{18}\text{H}_{24}\text{N}^+ \text{C}_{48}\text{H}_{65}\text{O}_3\text{S}^- \cdot 1.5(\text{C}_6\text{H}_5\text{Cl})$ ) contains one cation, one anion and one and a half disordered molecules of chlorobenzene, with the half-molecule arising from a chlorobenzene molecule that sits across a crystallographic centre of inversion. The disordered solvent molecules could not be modelled adequately, so their contribution to the diffraction data was removed using the *SQUEEZE* routine of the program *PLATON*.<sup>45</sup> When the solvent molecules are excluded from the model, there are four cavities of  $217 \text{ \AA}^3$  and two cavities of  $172 \text{ \AA}^3$  per unit cell, with the latter sitting across centres of inversion. The total number of electrons contributing to each void was calculated by the *SQUEEZE* routine to be approximately 58 e. A chlorobenzene molecule has 58 e, which suggests that each cavity contains one molecule of chlorobenzene and this approximation was used in the subsequent calculation of the empirical formula, formula weight, density, linear absorption coefficient and  $F(000)$ . Based on the assumption, the overall ratio of cations : anions : solvent molecules is 1:1:1.5. The  $-\text{SO}_3^-$  group is disordered over two orientations. Two sets of positions were defined for the atoms of this group and the site occupation factor of the major conformation of the group refined to 0.737(3). Similarity restraints were applied to the chemically equivalent bond lengths involving all disordered O-atoms, while neighbouring atoms within and between each of the disordered orientations were restrained to have similar atomic displacement parameters. Pseudo-isotropic restraints were applied to the atomic displacement parameters of the atoms of one isopropyl group. A numerical absorption correction was applied.

### Crystallographic data

|                                        |                                                                  |
|----------------------------------------|------------------------------------------------------------------|
| Crystallised from                      | chlorobenzene / hexane                                           |
| Empirical formula                      | $\text{C}_{75}\text{H}_{96.5}\text{Cl}_{1.5}\text{NO}_3\text{S}$ |
| Formula weight [ $\text{g mol}^{-1}$ ] | 1145.26                                                          |
| Crystal colour, habit                  | colourless, plate                                                |

|                                                                               |                                                                                     |
|-------------------------------------------------------------------------------|-------------------------------------------------------------------------------------|
| Crystal dimensions [mm]                                                       | 0.04 × 0.14 × 0.16                                                                  |
| Temperature [K]                                                               | 160(1)                                                                              |
| Crystal system                                                                | monoclinic                                                                          |
| Space group                                                                   | $P2_1/c$ (#14)                                                                      |
| Z                                                                             | 4                                                                                   |
| Reflections for cell determination                                            | 22564                                                                               |
| 2 $\theta$ range for cell determination [°]                                   | 5–144                                                                               |
| Unit cell parameters                                                          |                                                                                     |
| <i>a</i> [Å]                                                                  | 10.59983(10)                                                                        |
| <i>b</i> [Å]                                                                  | 21.2959(2)                                                                          |
| <i>c</i> [Å]                                                                  | 30.1508(2)                                                                          |
| $\alpha$ [°]                                                                  | 90                                                                                  |
| $\beta$ [°]                                                                   | 91.5265(8)                                                                          |
| $\gamma$ [°]                                                                  | 90                                                                                  |
| <i>V</i> [Å <sup>3</sup> ]                                                    | 6803.61(10)                                                                         |
| <i>F</i> (000)                                                                | 2476                                                                                |
| <i>D</i> <sub>x</sub> [g cm <sup>-3</sup> ]                                   | 1.118                                                                               |
| $\mu$ (Cu <i>K</i> $\alpha$ ) [mm <sup>-1</sup> ]                             | 1.306                                                                               |
| Scan type                                                                     | $\omega$                                                                            |
| 2 $\theta$ <sub>(max)</sub> [°]                                               | 143.5                                                                               |
| Transmission factors (min; max)                                               | 0.780; 1.000                                                                        |
| Total reflections measured                                                    | 64901                                                                               |
| Symmetry independent reflections                                              | 13200                                                                               |
| <i>R</i> <sub>int</sub>                                                       | 0.028                                                                               |
| Reflections with <i>I</i> > 2 $\sigma$ ( <i>I</i> )                           | 10750                                                                               |
| Reflections used in refinement                                                | 13200                                                                               |
| Parameters refined; restraints                                                | 689; 69                                                                             |
| Final <i>R</i> ( <i>F</i> ) [ <i>I</i> > 2 $\sigma$ ( <i>I</i> ) reflections] | 0.0523                                                                              |
| <i>wR</i> ( <i>F</i> <sup>2</sup> ) (all data)                                | 0.1517                                                                              |
| Weights:                                                                      | $w = [\sigma^2(F_o^2) + (0.0756P)^2 + 2.5261P]^{-1}$ where $P = (F_o^2 + 2F_c^2)/3$ |
| Goodness of fit                                                               | 1.050                                                                               |
| Final $\Delta_{\max}/\sigma$                                                  | 0.001                                                                               |

$\Delta\rho$  (max; min) [ $e \text{ \AA}^{-3}$ ]

0.45; -0.30

$\sigma(d_{(c-c)})$  [ $\text{\AA}$ ]

0.0019 – 0.006

## Crystal structure of $C4^+A2^-$

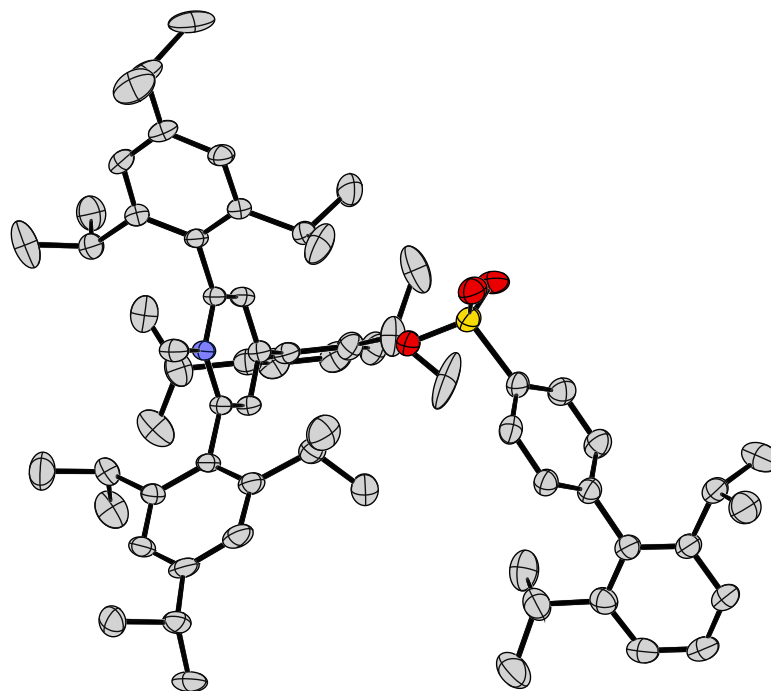

The asymmetric unit in the structure of  $C4^+A2^-$  ( $C_{48}H_{68}N^+ C_{18}H_{21}O_3S^- \cdot 0.5(C_8H_{10})$ ), contains one cation, one anion and one half of a disordered molecule of  $p$ -xylene with the half-molecule arising from a  $p$ -xylene molecule that sits across a crystallographic centre of inversion. In the anion, the  $-SO_3^-$  group is disordered, while in the cation, three  $i$ Pr groups are disordered. Two sets of positions were defined for the O-atoms of the  $-SO_3^-$  group (site occupation factor of the major conformation refined to 0.58(3)), for the two methyl groups of two  $i$ Pr groups (site occupation factors for the major conformations of the groups bonded to C30 and C45 refined to 0.591(19) and 0.644(15), respectively), for the entire  $i$ Pr group at C55 (site occupation factor for the major conformation refined to 0.672(5)), and for the symmetry-unique atoms of the solvent molecule (site occupation factor for the major conformation refined to 0.700(5)). Similarity restraints were applied to the chemically equivalent bond lengths involving all disordered atoms, as well as to the O $\cdots$ O distances in the  $-SO_3^-$  group, while neighbouring atoms within and between each of the disordered conformations were restrained to have similar atomic displacement parameters. Pseudo-isotropic restraints were also applied to the atomic displacement parameters of the atoms of one disordered  $i$ Pr group. A numerical absorption correction was applied.

### Crystallographic data

|                                       |                                                   |
|---------------------------------------|---------------------------------------------------|
| Crystallised from                     | Et <sub>2</sub> O / hexanes / $p$ -xylene         |
| Empirical formula                     | C <sub>70</sub> H <sub>94</sub> NO <sub>3</sub> S |
| Formula weight [g mol <sup>-1</sup> ] | 1029.52                                           |
| Crystal colour, habit                 | colourless, prism                                 |
| Crystal dimensions [mm]               | 0.09 × 0.25 × 0.36                                |
| Temperature [K]                       | 160(1)                                            |

|                                                                               |                                                                                     |
|-------------------------------------------------------------------------------|-------------------------------------------------------------------------------------|
| Crystal system                                                                | triclinic                                                                           |
| Space group                                                                   | $P\bar{1}$ (#2)                                                                     |
| Z                                                                             | 2                                                                                   |
| Reflections for cell determination                                            | 38626                                                                               |
| 2 $\theta$ range for cell determination [°]                                   | 4–153                                                                               |
| Unit cell parameters                                                          |                                                                                     |
| <i>a</i> [Å]                                                                  | 12.7871(4)                                                                          |
| <i>b</i> [Å]                                                                  | 13.2999(5)                                                                          |
| <i>c</i> [Å]                                                                  | 21.1254(5)                                                                          |
| $\alpha$ [°]                                                                  | 73.610(2)                                                                           |
| $\beta$ [°]                                                                   | 84.331(2)                                                                           |
| $\gamma$ [°]                                                                  | 64.782(3)                                                                           |
| <i>V</i> [Å <sup>3</sup> ]                                                    | 3117.29(19)                                                                         |
| <i>F</i> (000)                                                                | 1122                                                                                |
| <i>D</i> <sub>x</sub> [g cm <sup>-3</sup> ]                                   | 1.097                                                                               |
| $\mu$ (Cu <i>K</i> $\alpha$ ) [mm <sup>-1</sup> ]                             | 0.796                                                                               |
| Scan type                                                                     | $\omega$                                                                            |
| 2 $\theta$ <sub>(max)</sub> [°]                                               | 153.7                                                                               |
| Transmission factors (min; max)                                               | 0.385; 1.000                                                                        |
| Total reflections measured                                                    | 62886                                                                               |
| Symmetry independent reflections                                              | 12803                                                                               |
| <i>R</i> <sub>int</sub>                                                       | 0.020                                                                               |
| Reflections with <i>I</i> > 2 $\sigma$ ( <i>I</i> )                           | 11622                                                                               |
| Reflections used in refinement                                                | 12803                                                                               |
| Parameters refined; restraints                                                | 837; 326                                                                            |
| Final <i>R</i> ( <i>F</i> ) [ <i>I</i> > 2 $\sigma$ ( <i>I</i> ) reflections] | 0.0474                                                                              |
| <i>wR</i> ( <i>F</i> <sup>2</sup> ) (all data)                                | 0.1337                                                                              |
| Weights:                                                                      | $w = [\sigma^2(F_o^2) + (0.0692P)^2 + 1.0638P]^{-1}$ where $P = (F_o^2 + 2F_c^2)/3$ |
| Goodness of fit                                                               | 1.044                                                                               |
| Final $\Delta$ <sub>max</sub> / $\sigma$                                      | 0.002                                                                               |
| $\Delta\rho$ (max; min) [e Å <sup>-3</sup> ]                                  | 0.56; -0.58                                                                         |
| $\sigma$ ( <i>d</i> <sub>(c-c)</sub> ) [Å]                                    | 0.0014 – 0.013                                                                      |



## Crystal structure of $C3^+A3^-$

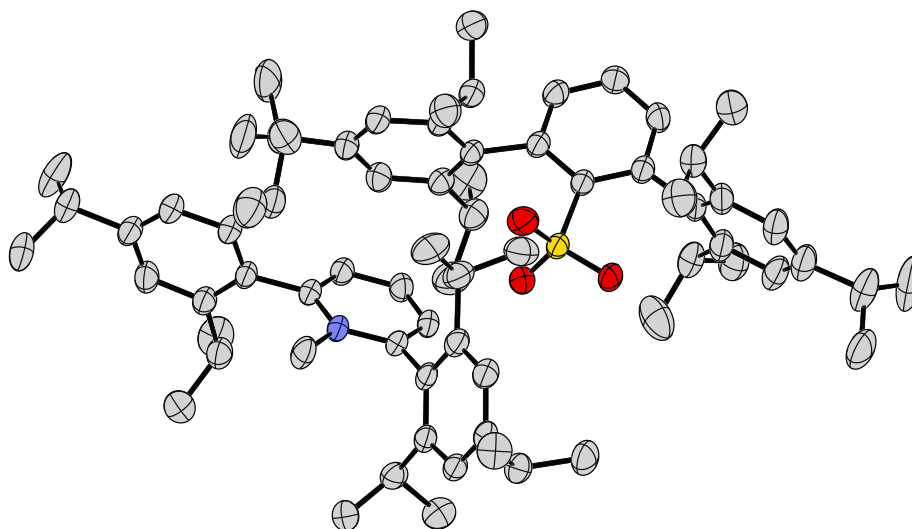

The asymmetric unit in the structure of  $C3^+A3^-$  ( $C_{36}H_{52}N^+ C_{36}H_{49}O_3S^-$ ) contains one cation and one anion. Some of the isopropyl groups are possibly slightly disordered. Disorder has been modelled for one of these in the anion. In other groups, modelling the disorder does not bring any improvement overall. Two sets of positions were defined for the methyl atoms of the isopropyl group for which disorder was modelled and the site occupation factor of the major conformation of this group refined to 0.778(13). Similarity restraints were applied to the chemically equivalent C–C bond lengths involving all disordered atoms and these C-atoms were restrained to have similar and pseudo-isotropic atomic displacement parameters. In addition, rigid bond restraints were applied to the atomic displacement parameters of all non-hydrogen atoms.

### Crystallographic data:

|                                            |                                |
|--------------------------------------------|--------------------------------|
| Crystallised from                          | hexanes                        |
| Empirical formula                          | $C_{72}H_{101}NO_3S$           |
| Formula weight [ $g\ mol^{-1}$ ]           | 1060.59                        |
| Crystal colour, habit                      | colourless, prism              |
| Crystal dimensions [mm]                    | $0.06 \times 0.10 \times 0.20$ |
| Temperature [K]                            | 160(1)                         |
| Crystal system                             | triclinic                      |
| Space group                                | $P\bar{1}$ (#2)                |
| Z                                          | 2                              |
| Reflections for cell determination         | 23840                          |
| $2\theta$ range for cell determination [°] | 6–149                          |

|                      |                                               |                                                                                     |
|----------------------|-----------------------------------------------|-------------------------------------------------------------------------------------|
| Unit cell parameters | $a$ [Å]                                       | 13.0647(2)                                                                          |
|                      | $b$ [Å]                                       | 13.6914(3)                                                                          |
|                      | $c$ [Å]                                       | 20.0229(4)                                                                          |
|                      | $\alpha$ [°]                                  | 81.6247(15)                                                                         |
|                      | $\beta$ [°]                                   | 78.9167(15)                                                                         |
|                      | $\gamma$ [°]                                  | 73.8402(16)                                                                         |
|                      | $V$ [Å <sup>3</sup> ]                         | 3359.73(12)                                                                         |
|                      | $F(000)$                                      | 1160                                                                                |
|                      | $D_x$ [g cm <sup>-3</sup> ]                   | 1.048                                                                               |
|                      | $\mu(\text{Cu } K\alpha)$ [mm <sup>-1</sup> ] | 0.750                                                                               |
|                      | Scan type                                     | $\omega$                                                                            |
|                      | $2\theta_{(\text{max})}$ [°]                  | 148.9                                                                               |
|                      | Transmission factors (min; max)               | 0.168; 1.000                                                                        |
|                      | Total reflections measured                    | 63461                                                                               |
|                      | Symmetry independent reflections              | 13524                                                                               |
|                      | $R_{\text{int}}$                              | 0.048                                                                               |
|                      | Reflections with $I > 2\sigma(I)$             | 10537                                                                               |
|                      | Reflections used in refinement                | 13524                                                                               |
|                      | Parameters refined; restraints                | 740; 666                                                                            |
|                      | Final $R(F)$ [ $I > 2\sigma(I)$ reflections]  | 0.0527                                                                              |
|                      | $wR(F^2)$ (all data)                          | 0.1529                                                                              |
|                      | Weights:                                      | $w = [\sigma^2(F_o^2) + (0.0769P)^2 + 1.0432P]^{-1}$ where $P = (F_o^2 + 2F_c^2)/3$ |
|                      | Goodness of fit                               | 1.026                                                                               |
|                      | Final $\Delta_{\text{max}}/\sigma$            | 0.054                                                                               |
|                      | $\Delta\rho$ (max; min) [e Å <sup>-3</sup> ]  | 0.56; -0.29                                                                         |
|                      | $\sigma(d_{(c-c)})$ [Å]                       | 0.002 – 0.005                                                                       |

## Crystal structure of 1

view 1:

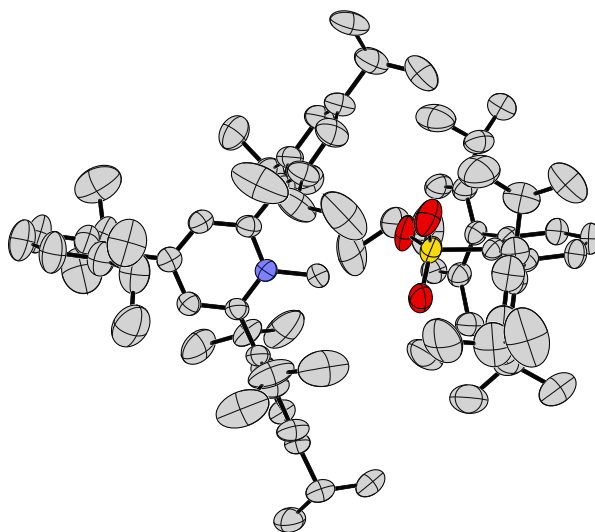

view 2:

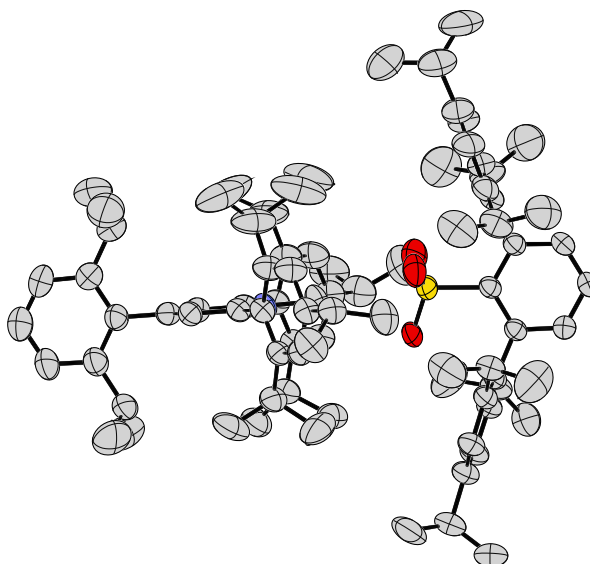

view 3:

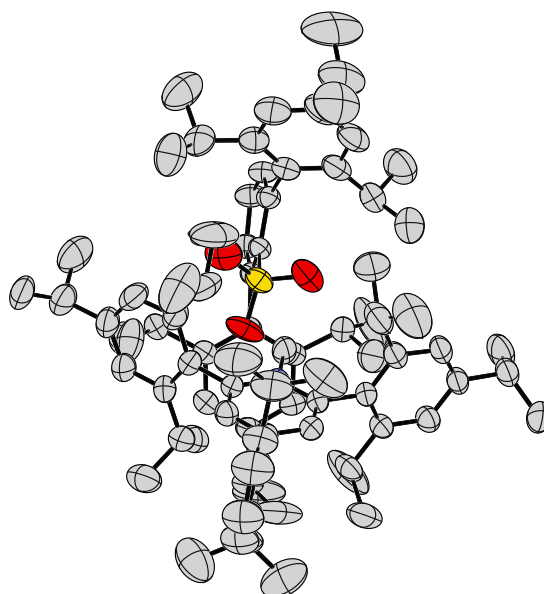

The crystals of **1** ( $C_{48}H_{68}N^+ C_{36}H_{49}O_3S^- \cdot C_6H_{12}$ ) were very weakly diffracting and while the molecular connectivity is unambiguous, the overall quality of the structure is poorer than normal. There is probably disorder in some of the isopropyl groups, because the atomic displacement parameters for the atoms of these groups are quite elongated. Attempts to model the disorder did not yield any improvement, and an ordered model was employed for the isopropyl groups in the final refinement. On the other hand, the O-atoms of the sulfonate group could be modelled as disordered over two positions and the site occupation factor of the major orientation of this group refined to 0.792(4). Similarity restraints were applied to the S–O bond lengths and O···O distances, while the O-atoms were restrained to have similar atomic displacement parameters. The asymmetric unit appears to contain one disordered molecule of cyclohexane, although this could not be modelled successfully, so the *SQUEEZE* routine of the program *PLATON*<sup>45</sup> was employed. Omission of the solvent molecules leaves two centrosymmetric cavities of 555 Å<sup>3</sup> per unit cell. The number of electrons contributing to each void in the structure was calculated by the *SQUEEZE* routine to be approximately 104 e. Allowing for two cyclohexane molecules per cavity (one per asymmetric unit) yields 96 e and this approximation was been used in the subsequent calculation of the empirical formula, formula weight, density, linear absorption coefficient and *F*(000). Based on the assumption, the ratio of cations and anions to cyclohexane in the structure is 1:1.

#### Crystallographic data

|                                             |                                                    |
|---------------------------------------------|----------------------------------------------------|
| Crystallised from                           | hexane                                             |
| Empirical formula                           | C <sub>90</sub> H <sub>129</sub> NO <sub>3</sub> S |
| Formula weight [g mol <sup>-1</sup> ]       | 1304.99                                            |
| Crystal colour, habit                       | colourless, tablet                                 |
| Crystal dimensions [mm]                     | 0.03 × 0.07 × 0.14                                 |
| Temperature [K]                             | 160(1)                                             |
| Crystal system                              | monoclinic                                         |
| Space group                                 | <i>P</i> 2 <sub>1</sub> / <i>n</i> (#14)           |
| <i>Z</i>                                    | 4                                                  |
| Reflections for cell determination          | 10964                                              |
| 2 $\theta$ range for cell determination [°] | 7–120                                              |
| Unit cell parameters                        |                                                    |
| <i>a</i> [Å]                                | 12.6383(3)                                         |
| <i>b</i> [Å]                                | 41.8526(11)                                        |
| <i>c</i> [Å]                                | 16.5501(4)                                         |
| $\alpha$ [°]                                | 90                                                 |
| $\beta$ [°]                                 | 105.600(3)                                         |

|  |                                               |                                                                                     |
|--|-----------------------------------------------|-------------------------------------------------------------------------------------|
|  | $\gamma$ [°]                                  | 90                                                                                  |
|  | $V$ [Å <sup>3</sup> ]                         | 8431.6(4)                                                                           |
|  | $F(000)$                                      | 2864                                                                                |
|  | $D_x$ [g cm <sup>-3</sup> ]                   | 1.028                                                                               |
|  | $\mu(\text{Cu } K\alpha)$ [mm <sup>-1</sup> ] | 0.675                                                                               |
|  | Scan type                                     | $\omega$                                                                            |
|  | $2\theta_{(\text{max})}$ [°]                  | 148.4                                                                               |
|  | Transmission factors (min; max)               | 0.609; 1.000                                                                        |
|  | Total reflections measured                    | 79461                                                                               |
|  | Symmetry independent reflections              | 16862                                                                               |
|  | $R_{\text{int}}$                              | 0.062                                                                               |
|  | Reflections with $I > 2\sigma(I)$             | 10209                                                                               |
|  | Reflections used in refinement                | 16860                                                                               |
|  | Parameters refined; restraints                | 859; 66                                                                             |
|  | Final $R(F)$ [ $I > 2\sigma(I)$ reflections]  | 0.0801                                                                              |
|  | $wR(F^2)$ (all data)                          | 0.2468                                                                              |
|  | Weights:                                      | $w = [\sigma^2(F_o^2) + (0.1236P)^2 + 2.3129P]^{-1}$ where $P = (F_o^2 + 2F_c^2)/3$ |
|  | Goodness of fit                               | 1.033                                                                               |
|  | Final $\Delta_{\text{max}}/\sigma$            | 0.001                                                                               |
|  | $\Delta\rho$ (max; min) [e Å <sup>-3</sup> ]  | 1.04; -0.43                                                                         |
|  | $\sigma(d_{(\text{C-C})})$ [Å]                | 0.004 – 0.008                                                                       |

## Crystal structure of 2

view 1:

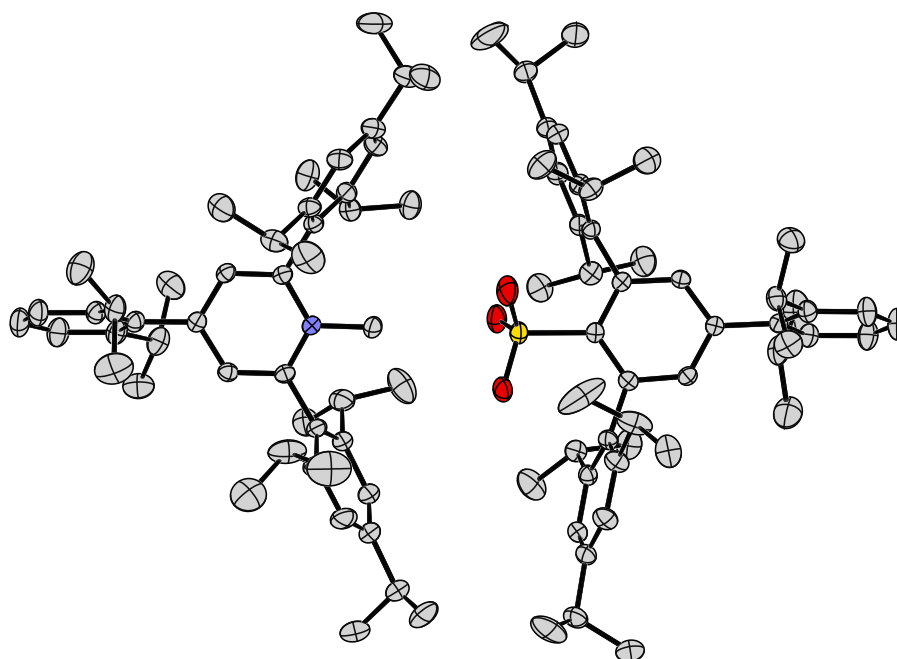

view 2:

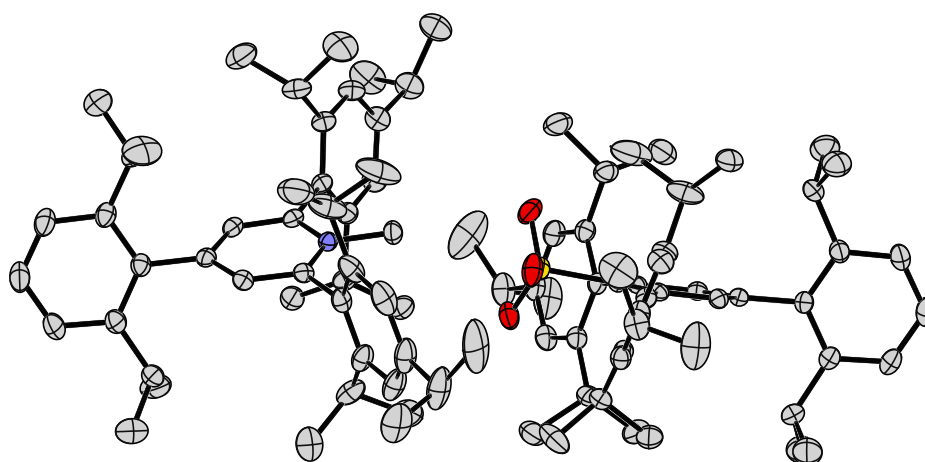

view 3:

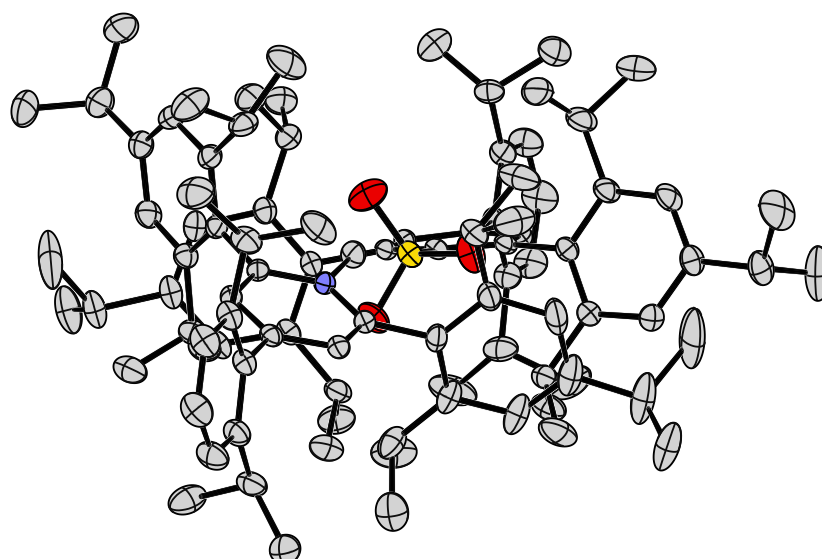

The asymmetric unit in the structure of **2** ( $C_{48}H_{68}N^+ C_{48}H_{65}O_3S^- \cdot 0.5C_6H_{14} \cdot 2H_2O$ ) contains one cation, one anion and some highly diffuse and disordered solvent molecules whose exact nature cannot be elucidated, but it is surmised that hexane and water might be present. The contribution of the solvent molecules to the diffraction data was removed by using the *SQUEEZE* routine of the program *PLATON*.<sup>45</sup> Omission of the solvent molecules leaves one cavity of 511 Å<sup>3</sup>, situated about a centre of inversion, and two cavities of 90 Å<sup>3</sup> per unit cell. The number of electrons contributing the first void was calculated by the *SQUEEZE* routine to be 77 e, while 15 e are contained in each of the smaller voids in the unit cell (total 107 e per unit cell). Allowing for one molecule of hexane (50 e) and two water molecules (10 e each) in the large void and one water molecule in each of the smaller voids yields 90 e and this approximation was used in the subsequent calculation of the empirical formula, formula weight, density, linear absorption coefficient and F(000). Based on the assumption, the ratio of cations:anions:hexane:H<sub>2</sub>O is 1:1:0.5:2. Some of the <sup>i</sup>Pr groups show evidence of disorder. Disorder was modelled for one of these groups, but attempts to model the disorder for other groups did not yield any improvement in the model, so these groups were refined as ordered, albeit with enlarged atomic displacement parameters for some C-atoms. Two sets of positions were defined for the methyl atoms of one <sup>i</sup>Pr group and the site occupation factor of the major conformation refined to 0.512(8). Similarity restraints were applied to the C–C bond lengths involving all disordered C-atoms, while neighbouring disordered atoms were restrained to have similar atomic displacement parameters. A correction for secondary extinction was applied.

### Crystallographic data

|                                             |                                                    |
|---------------------------------------------|----------------------------------------------------|
| Crystallised from                           | hexane                                             |
| Empirical formula                           | C <sub>99</sub> H <sub>144</sub> NO <sub>6</sub> S |
| Formula weight [g mol <sup>-1</sup> ]       | 1460.20                                            |
| Crystal colour, habit                       | colourless, prism                                  |
| Crystal dimensions [mm]                     | 0.16 × 0.20 × 0.22                                 |
| Temperature [K]                             | 160(1)                                             |
| Crystal system                              | triclinic                                          |
| Space group                                 | $P\bar{1}$ (#2)                                    |
| Z                                           | 2                                                  |
| Reflections for cell determination          | 40984                                              |
| 2 $\theta$ range for cell determination [°] | 6–149                                              |
| Unit cell parameters                        |                                                    |
| <i>a</i> [Å]                                | 14.5585(3)                                         |
| <i>b</i> [Å]                                | 17.4027(3)                                         |
| <i>c</i> [Å]                                | 21.0730(4)                                         |
| $\alpha$ [°]                                | 102.6796(16)                                       |

|                                               |                                                                                     |               |
|-----------------------------------------------|-------------------------------------------------------------------------------------|---------------|
|                                               | $\beta$ [°]                                                                         | 103.5351(15)  |
|                                               | $\gamma$ [°]                                                                        | 106.4067(16)  |
|                                               | $V$ [Å <sup>3</sup> ]                                                               | 4740.12(17)   |
| $F(000)$                                      |                                                                                     | 1602          |
| $D_x$ [g cm <sup>-3</sup> ]                   |                                                                                     | 1.023         |
| $\mu(\text{Cu } K\alpha)$ [mm <sup>-1</sup> ] |                                                                                     | 0.661         |
| Scan type                                     |                                                                                     | $\omega$      |
| $2\theta_{(\text{max})}$ [°]                  |                                                                                     | 148.9         |
| Transmission factors (min; max)               |                                                                                     | 0.835; 1.000  |
| Total reflections measured                    |                                                                                     | 87128         |
| Symmetry independent reflections              |                                                                                     | 18497         |
| $R_{\text{int}}$                              |                                                                                     | 0.020         |
| Reflections with $I > 2\sigma(I)$             |                                                                                     | 15960         |
| Reflections used in refinement                |                                                                                     | 18497         |
| Parameters refined; restraints                |                                                                                     | 965; 18       |
| Final $R(F)$ [ $I > 2\sigma(I)$ reflections]  |                                                                                     | 0.0534        |
| $wR(F^2)$ (all data)                          |                                                                                     | 0.1581        |
| Weights:                                      | $w = [\sigma^2(F_o^2) + (0.0816P)^2 + 1.8296P]^{-1}$ where $P = (F_o^2 + 2F_c^2)/3$ |               |
| Goodness of fit                               |                                                                                     | 1.039         |
| Secondary extinction coefficient              |                                                                                     | 0.00049(9)    |
| Final $\Delta_{\text{max}}/\sigma$            |                                                                                     | 0.001         |
| $\Delta\rho$ (max; min) [e Å <sup>-3</sup> ]  |                                                                                     | 0.49; -0.34   |
| $\sigma(d_{(\text{C-C})})$ [Å]                |                                                                                     | 0.002 – 0.005 |



### Crystal structure of 3

view 1:

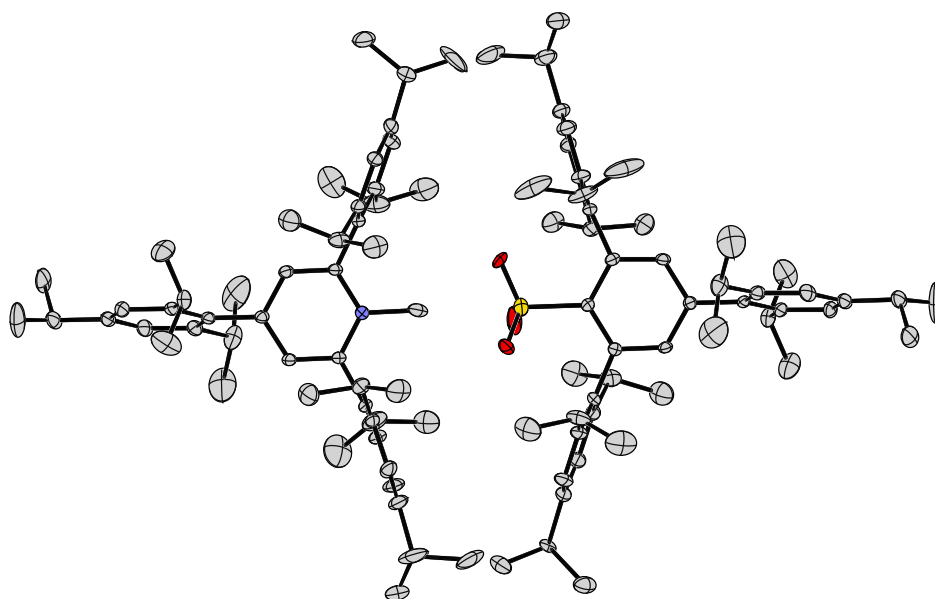

view 2:

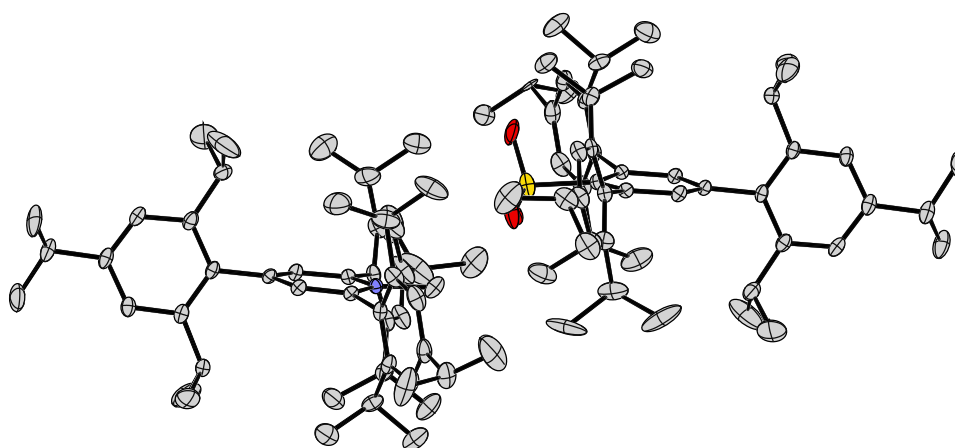

view 3:

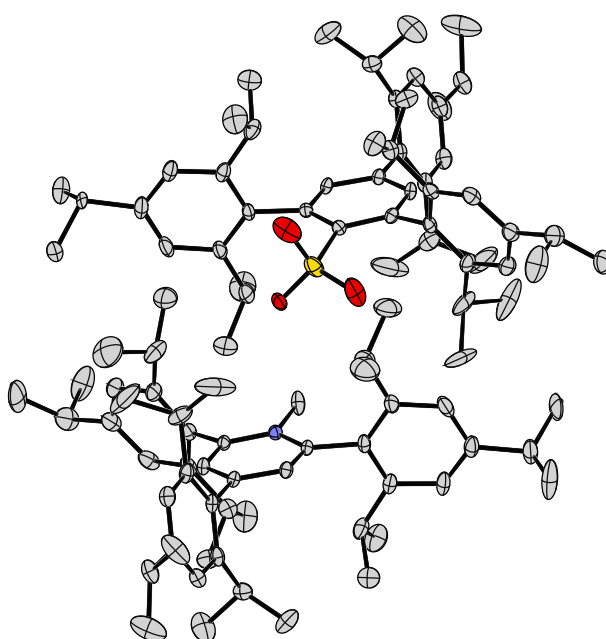

The space group of the structure of **3** ( $C_{51}H_{74}N^+ C_{51}H_{71}O_3S^-$ ) is non-centrosymmetric, but achiral. Refinement of the absolute structure parameter<sup>46</sup> indicates that the crystals are inversion twins. The asymmetric unit contains one cation and one anion and the structure is actually very close to being centrosymmetric, with the carbon framework of the cation closely related to that of the anion by a centre of inversion. However, the potential symmetry is broken by the  $MeN^+$  and  $-SO_3^-$  groups, which are not disordered across both entities in the asymmetric unit. Several *i*Pr groups and the  $SO_3^-$  group are disordered and three of the *i*Pr groups and the  $-SO_3^-$  group were modelled with two sets of positions for the atoms; the site occupation factors of the major conformations of these groups refined to 0.592(9), 0.67(3) and 0.853(10) for the three *i*Pr groups and 0.61(3) for the  $-SO_3^-$  group. Similarity restraints were applied to the chemically equivalent bond lengths involving all disordered atoms, as well as to the methyl C...C and sulfonate O...O distances within these groups. Neighbouring atoms within and between each of the disordered conformations were restrained to have similar, and for one methine C-atom pseudo-isotropic, atomic displacement parameters.

### Crystallographic data

|                                       |                                 |
|---------------------------------------|---------------------------------|
| Crystallised from                     | <i>n</i> -hexane / benzene      |
| Empirical formula                     | $C_{102}H_{145}NO_3S$           |
| Formula weight [g mol <sup>-1</sup> ] | 1465.24                         |
| Crystal colour, habit                 | colourless, prism               |
| Crystal dimensions [mm]               | 0.09 × 0.12 × 0.21              |
| Temperature [K]                       | 160(1)                          |
| Crystal system                        | orthorhombic                    |
| Space group                           | <i>Pca</i> 2 <sub>1</sub> (#29) |
| Z                                     | 4                               |
| Reflections for cell determination    | 25563                           |
| 2θ range for cell determination [°]   | 6–144                           |
| Unit cell parameters                  |                                 |
| <i>a</i> [Å]                          | 20.7763(9)                      |
| <i>b</i> [Å]                          | 15.59946(12)                    |
| <i>c</i> [Å]                          | 28.00819(12)                    |
| α [°]                                 | 90                              |
| β [°]                                 | 90                              |
| γ [°]                                 | 90                              |
| <i>V</i> [Å <sup>3</sup> ]            | 9077.4(4)                       |
| <i>F</i> (000)                        | 3216                            |
|                                       | S250                            |

|                                               |                                                                                     |
|-----------------------------------------------|-------------------------------------------------------------------------------------|
| $D_x$ [g cm <sup>-3</sup> ]                   | 1.072                                                                               |
| $\mu(\text{Cu } K\alpha)$ [mm <sup>-1</sup> ] | 0.675                                                                               |
| Scan type                                     | $\omega$                                                                            |
| $2\theta_{(\text{max})}$ [°]                  | 143.6                                                                               |
| Transmission factors (min; max)               | 0.675; 1.000                                                                        |
| Total reflections measured                    | 45042                                                                               |
| Symmetry independent reflections              | 16806                                                                               |
| $R_{\text{int}}$                              | 0.023                                                                               |
| Reflections with $I > 2\sigma(I)$             | 15546                                                                               |
| Reflections used in refinement                | 16806                                                                               |
| Parameters refined; restraints                | 1102; 269                                                                           |
| Final $R(F)$ [ $I > 2\sigma(I)$ reflections]  | 0.0643                                                                              |
| $wR(F^2)$ (all data)                          | 0.1810                                                                              |
| Weights:                                      | $w = [\sigma^2(F_o^2) + (0.1133P)^2 + 4.3950P]^{-1}$ where $P = (F_o^2 + 2F_c^2)/3$ |
| Goodness of fit                               | 1.022                                                                               |
| Final $\Delta_{\text{max}}/\sigma$            | 0.000                                                                               |
| $\Delta\rho$ (max; min) [e Å <sup>-3</sup> ]  | 0.60; -0.34                                                                         |
| $\sigma(d_{(\text{c-c})})$ [Å]                | 0.004 – 0.011                                                                       |

## Crystal structure of 4

view 1:

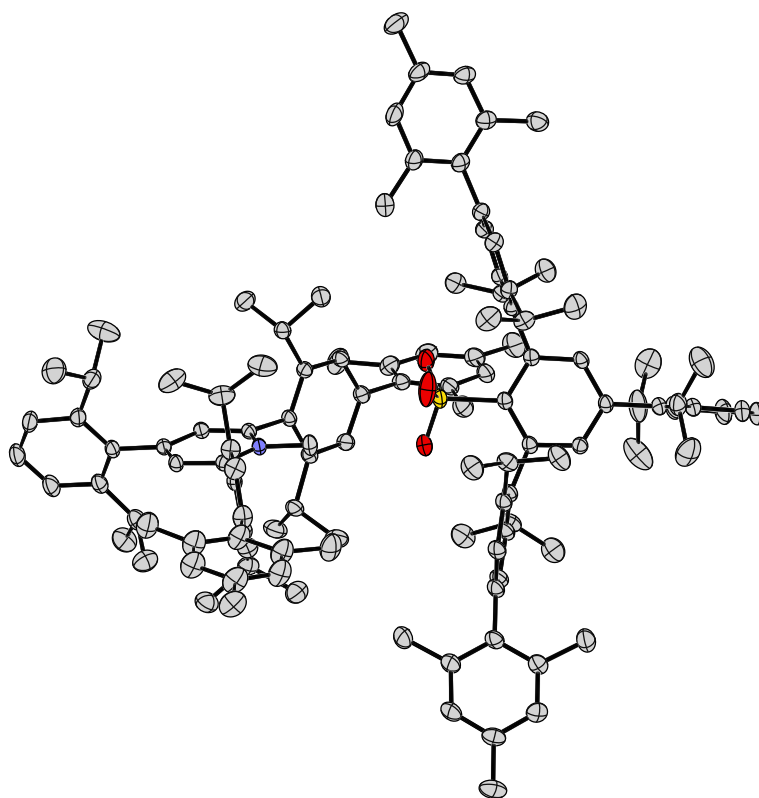

view 2:

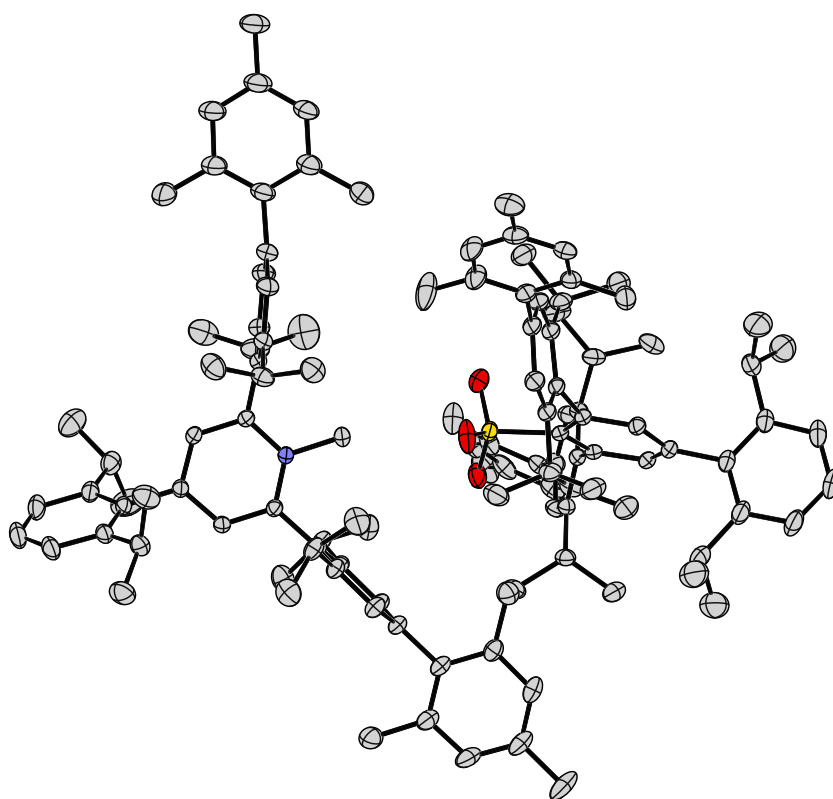

view 3:

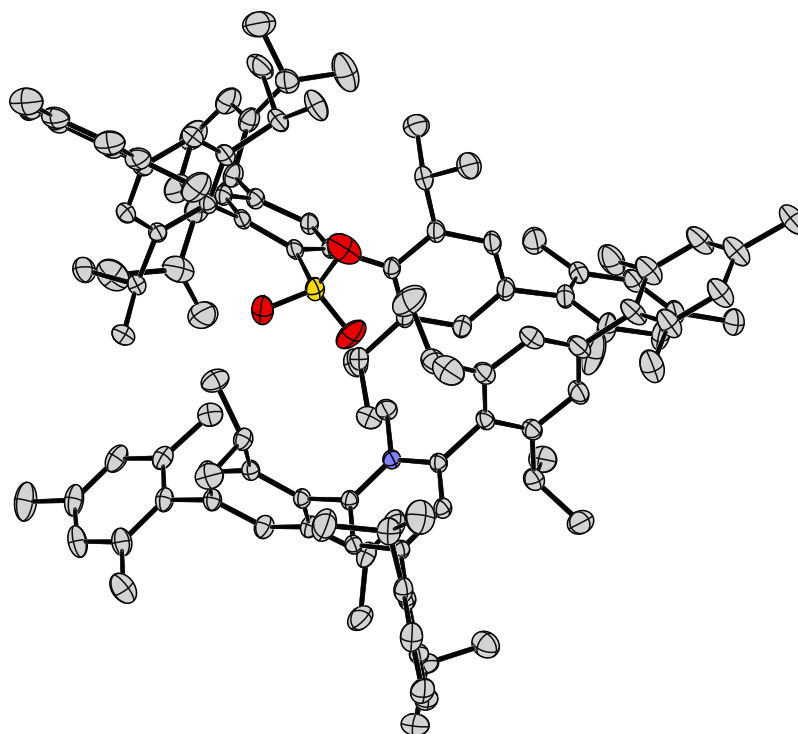

The asymmetric unit in the structure of **4** ( $C_{60}H_{76}N^+ C_{60}H_{73}O_3S^- \cdot 1.65C_6H_6 \cdot 1.63H_2O$ ) contains one cation, one anion, one fully occupied ordered benzene molecule on a general position, one half of a fully occupied disordered benzene molecule, which sits across a centre of inversion, another half of a partially occupied ordered benzene molecule, which also sits across a centre of inversion, and two sites for water molecules, one of which is partially occupied. For the partially occupied benzene and water molecules, the site occupation factors refined to 0.303(5) and 0.627(7), respectively. For the disordered benzene molecule, two sets of positions were defined for the symmetry-unique atoms and the site occupation factor of the major conformation refined to 0.556(8). Bond length restraints of 1.395(5) Å were applied to the C–C bond lengths within both of the benzene molecules that lie across centres of inversion, while neighbouring atoms within these benzene molecules were restrained to have similar atomic displacement parameters. One of the mesitylene groups is also disordered. Two sets of positions were defined for the atoms of this mesitylene group and the site occupation factor of the major conformation refined to 0.685(9). Similarity restraints were applied to the chemically equivalent bond lengths and angles involving all disordered C-atoms of this mesitylene group, while neighbouring atoms within and between each conformation of the disordered mesitylene group were restrained to have similar atomic displacement parameters. The water H-atoms could not be located in any difference electron density map. Three of the four water H-atoms were placed in calculated positions which yielded the best hydrogen bonding interactions with anion O-atoms or a neighbouring water molecule and their positions were refined using a riding model. The fourth water H-atom was omitted from the model. All remaining H-atoms were placed in geometrically calculated positions and refined using a riding model.

#### Crystallographic data

Crystallised from

benzene / heptane

|                                                                               |                                  |
|-------------------------------------------------------------------------------|----------------------------------|
| Empirical formula                                                             | $C_{129.91}H_{162.11}NO_{4.60}S$ |
| Formula weight [g mol <sup>-1</sup> ]                                         | 1843.27                          |
| Crystal colour, habit                                                         | colourless, needle               |
| Crystal dimensions [mm]                                                       | 0.04 × 0.07 × 0.27               |
| Temperature [K]                                                               | 160(1)                           |
| Crystal system                                                                | triclinic                        |
| Space group                                                                   | $P\bar{1}$ (#2)                  |
| Z                                                                             | 2                                |
| Reflections for cell determination                                            | 42204                            |
| 2 $\theta$ range for cell determination [°]                                   | 7–149                            |
| Unit cell parameters                                                          |                                  |
| <i>a</i> [Å]                                                                  | 12.8742(2)                       |
| <i>b</i> [Å]                                                                  | 17.7178(2)                       |
| <i>c</i> [Å]                                                                  | 26.5501(5)                       |
| $\alpha$ [°]                                                                  | 101.7022(13)                     |
| $\beta$ [°]                                                                   | 94.6920(12)                      |
| $\gamma$ [°]                                                                  | 104.1168(15)                     |
| <i>V</i> [Å <sup>3</sup> ]                                                    | 5695.96(16)                      |
| <i>F</i> (000)                                                                | 2003                             |
| <i>D</i> <sub>x</sub> [g cm <sup>-3</sup> ]                                   | 1.075                            |
| $\mu$ (Cu <i>K</i> $\alpha$ ) [mm <sup>-1</sup> ]                             | 0.643                            |
| Scan type                                                                     | $\omega$                         |
| 2 $\theta$ <sub>(max)</sub> [°]                                               | 149.0                            |
| Transmission factors (min; max)                                               | 0.760; 1.000                     |
| Total reflections measured                                                    | 106920                           |
| Symmetry independent reflections                                              | 22424                            |
| <i>R</i> <sub>int</sub>                                                       | 0.034                            |
| Reflections with <i>I</i> > 2 $\sigma$ ( <i>I</i> )                           | 18536                            |
| Reflections used in refinement                                                | 22424                            |
| Parameters refined; restraints                                                | 1403; 424                        |
| Final <i>R</i> ( <i>F</i> ) [ <i>I</i> > 2 $\sigma$ ( <i>I</i> ) reflections] | 0.0539                           |
| <i>wR</i> ( <i>F</i> <sup>2</sup> ) (all data)                                | 0.1631                           |

|                                                  |                                                                                     |
|--------------------------------------------------|-------------------------------------------------------------------------------------|
| Weights:                                         | $w = [\sigma^2(F_O^2) + (0.0905P)^2 + 1.8135P]^{-1}$ where $P = (F_O^2 + 2F_C^2)/3$ |
| Goodness of fit                                  | 1.031                                                                               |
| Final $\Delta_{\max}/\sigma$                     | 0.001                                                                               |
| $\Delta\rho$ (max; min) [ $e \text{ \AA}^{-3}$ ] | 0.78; -0.48                                                                         |
| $\sigma(d_{(c-c)})$ [ $\text{\AA}$ ]             | 0.0019 – 0.014                                                                      |

Crystal structure of 5

view 1:

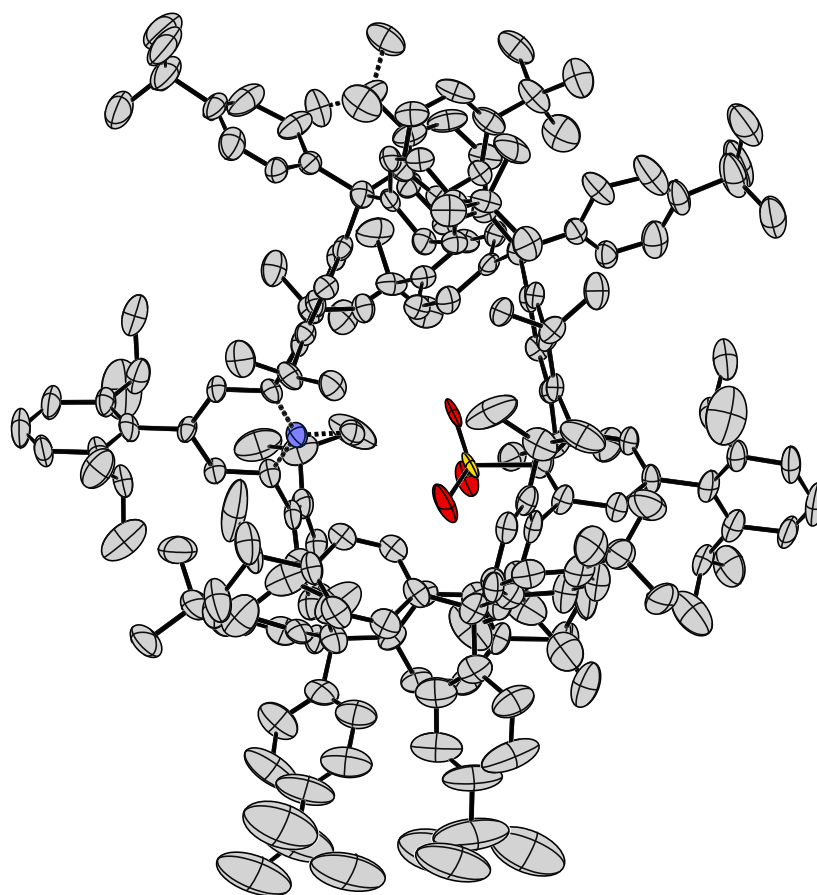

view 2:

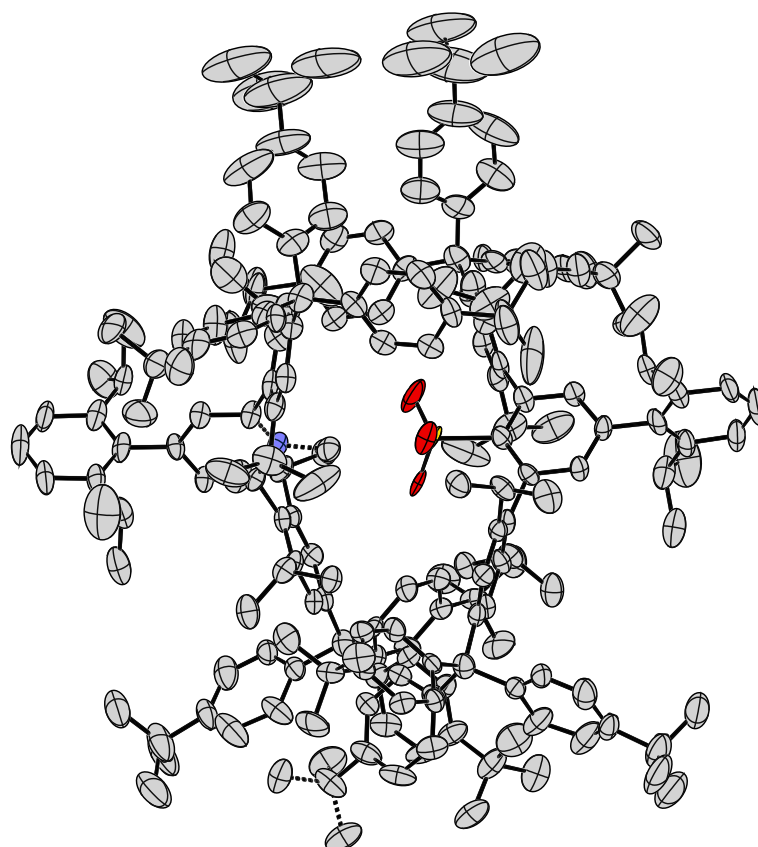



view 3:

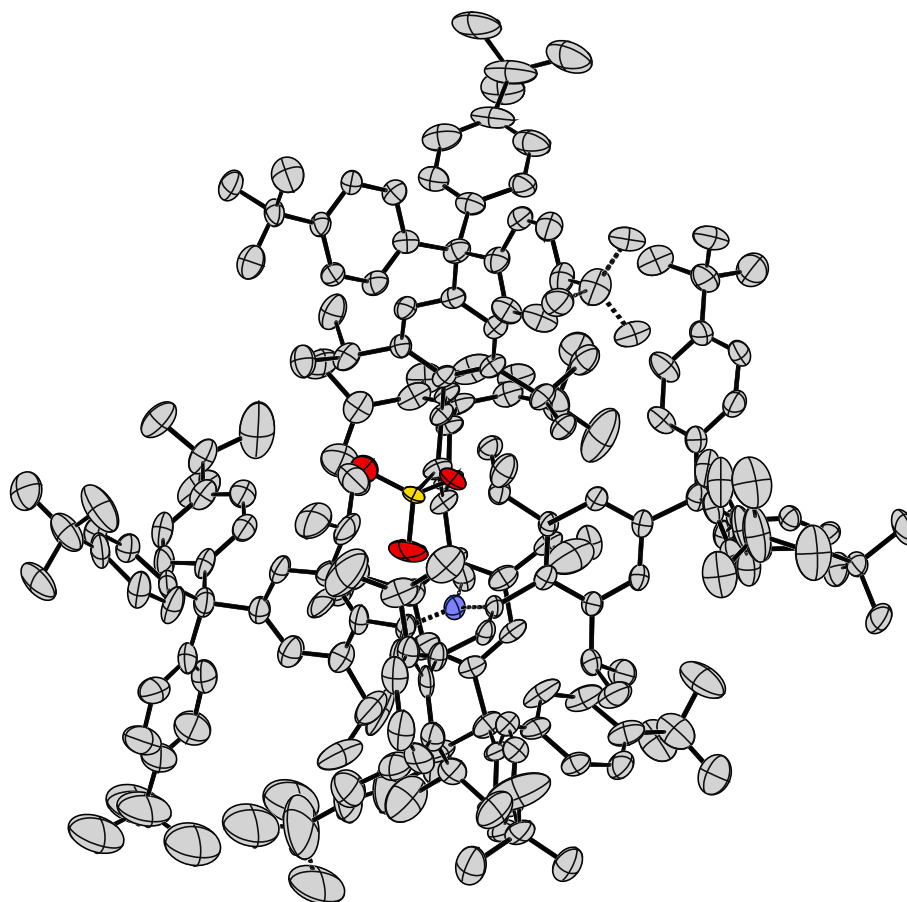

The structure of **5** ( $C_{104}H_{132}N^+ C_{104}H_{129}O_3S^- \cdot 30H_2O$ ) is an inversion twin; refinement of the absolute structure parameter<sup>14</sup> yielded a value of 0.53(2). In the structure, the cation and anion, being topologically almost identical, occupy the same sites in the crystal structure, so the C-SO<sub>3</sub> and N-Me groups are disordered. There are two such sites in the asymmetric unit and short contacts dictate that the cation:anion distribution at each site is 1:1. Each of these independent sites displays further disorder of some *t*-butyl groups, two in the ions at one site, three in the other. Two sets of positions were defined for the atoms of each disordered *t*-butyl group and for the disordered C-SO<sub>3</sub> and N-Me groups. The site occupation factors for the *t*-butyl groups were refined, while their sums were constrained to 1.0 within each disordered entity. Similarity restraints were applied to the C-C bond lengths and C<sub>methyl</sub>...C<sub>methyl</sub> distances involving all disordered *t*-butyl groups, while neighbouring atoms within and between each conformation of the disordered *t*-butyl groups were restrained to have similar atomic displacement parameters. Analogous similarity restraints were also applied to the N-C, C-S, S-O and O...O distances. For two *t*-butyl groups and the C-S and O-atoms, pseudo-isotropic restraints were additionally applied to the atomic displacement parameters, while rigid bond restraints were applied to all atoms in the structure model. Furthermore, the positions and atomic displacement parameters of the perfectly overlapping C- and N-atoms were constrained to be identical.

There are large solvent regions in the structure. Although the crystals were grown from hexane, no residual electron density peaks could be discerned that were indicative of hexane molecules. Instead, the

peaks were scattered throughout the solvent region with no recognisable pattern and were sometimes close to one another suggesting disorder. Consequently, the solvent mask routine of the program *OLEX2*<sup>47</sup> was employed to account for all solvent molecules. For convenience, it was assumed that all solvent molecules were water, although without further elemental or thermogravimetric analyses this is pure assumption. Omission of the solvent molecules leaves one cavity of 13925 Å<sup>3</sup> per unit cell. The total number of electrons contributing to this void in the unit cell was calculated to be approximately 1876 e. Allowing for 180 molecules of water per void yields 1800 e and this approximation was used in the subsequent calculation of the empirical formula, formula weight, density, linear absorption coefficient and F(000). Based on the assumption, the overall ratio of cations:anions:toluene:water is 1:1:30. However, the estimated solvent content is possibly too low, because the calculated density is lower than might be expected.

### Crystallographic data

|                                             |                                                      |
|---------------------------------------------|------------------------------------------------------|
| Crystallised from                           | hexane                                               |
| Empirical formula                           | C <sub>208</sub> H <sub>321</sub> NO <sub>33</sub> S |
| Formula weight [g mol <sup>-1</sup> ]       | 3395.70                                              |
| Crystal colour, habit                       | colourless, prism                                    |
| Crystal dimensions [mm]                     | 0.11 × 0.15 × 0.23                                   |
| Temperature [K]                             | 160(1)                                               |
| Crystal system                              | trigonal                                             |
| Space group                                 | <i>P</i> 321 (#150)                                  |
| Z                                           | 6                                                    |
| Reflections for cell determination          | 63910                                                |
| 2θ range for cell determination [°]         | 6–146                                                |
| Unit cell parameters                        |                                                      |
| <i>a</i> [Å]                                | 35.75342(15)                                         |
| <i>b</i> [Å]                                | 35.75342(15)                                         |
| <i>c</i> [Å]                                | 33.28987(10)                                         |
| α [°]                                       | 90                                                   |
| β [°]                                       | 90                                                   |
| γ [°]                                       | 120                                                  |
| <i>V</i> [Å <sup>3</sup> ]                  | 36853.4(3)                                           |
| <i>F</i> (000)                              | 11136                                                |
| <i>D</i> <sub>x</sub> [g cm <sup>-3</sup> ] | 0.918                                                |
| μ(Cu Kα) [mm <sup>-1</sup> ]                | 0.555                                                |

|                                                  |                                                                                     |
|--------------------------------------------------|-------------------------------------------------------------------------------------|
| Scan type                                        | $\omega$                                                                            |
| $2\theta_{(\max)}$ [°]                           | 146.1                                                                               |
| Transmission factors (min; max)                  | 0.709; 1.000                                                                        |
| Total reflections measured                       | 128470                                                                              |
| Symmetry independent reflections                 | 40388                                                                               |
| $R_{\text{int}}$                                 | 0.015                                                                               |
| Reflections with $I > 2\sigma(I)$                | 35260                                                                               |
| Reflections used in refinement                   | 40388                                                                               |
| Parameters refined; restraints                   | 2180; 3191                                                                          |
| Final $R(F)$ [ $I > 2\sigma(I)$ reflections]     | 0.0454                                                                              |
| $wR(F^2)$ (all data)                             | 0.1459                                                                              |
| Weights:                                         | $w = [\sigma^2(F_o^2) + (0.0940P)^2 + 2.1344P]^{-1}$ where $P = (F_o^2 + 2F_c^2)/3$ |
| Goodness of fit                                  | 1.084                                                                               |
| Final $\Delta_{\text{max}}/\sigma$               | 0.001                                                                               |
| $\Delta\rho$ (max; min) [ $e \text{ \AA}^{-3}$ ] | 0.35; -0.21                                                                         |
| $\sigma(d_{(c-c)})$ [ $\text{\AA}$ ]             | 0.003 – 0.008                                                                       |

## Crystal structure of 6

view 1:

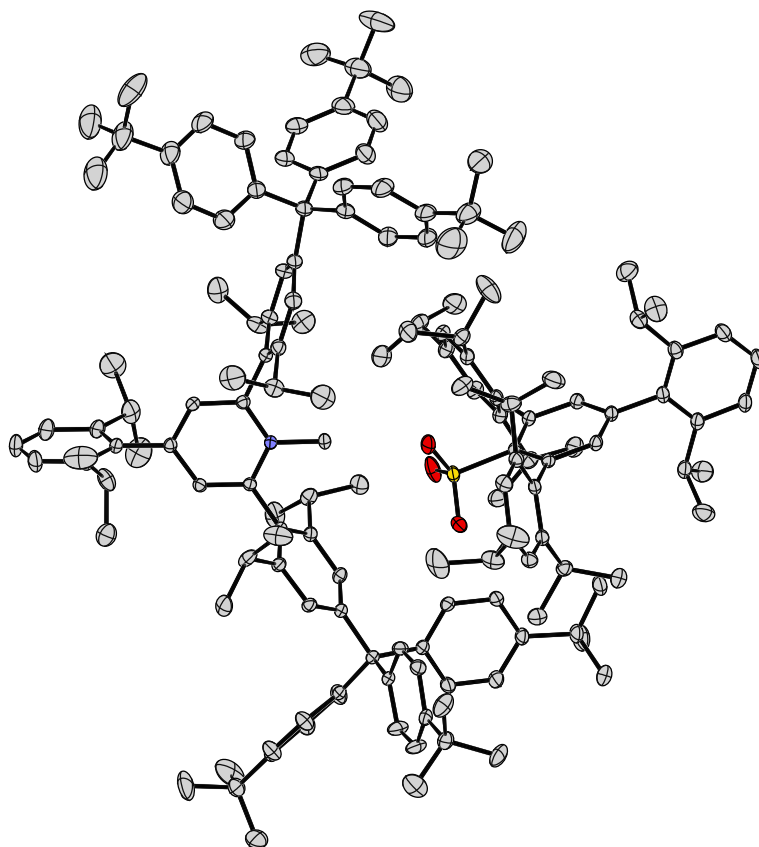

view 2:

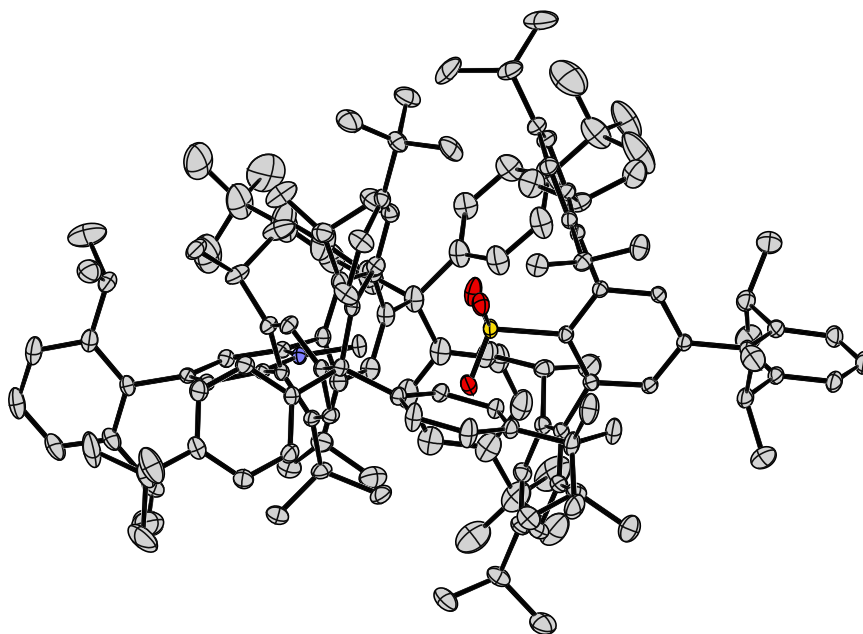

view 3:

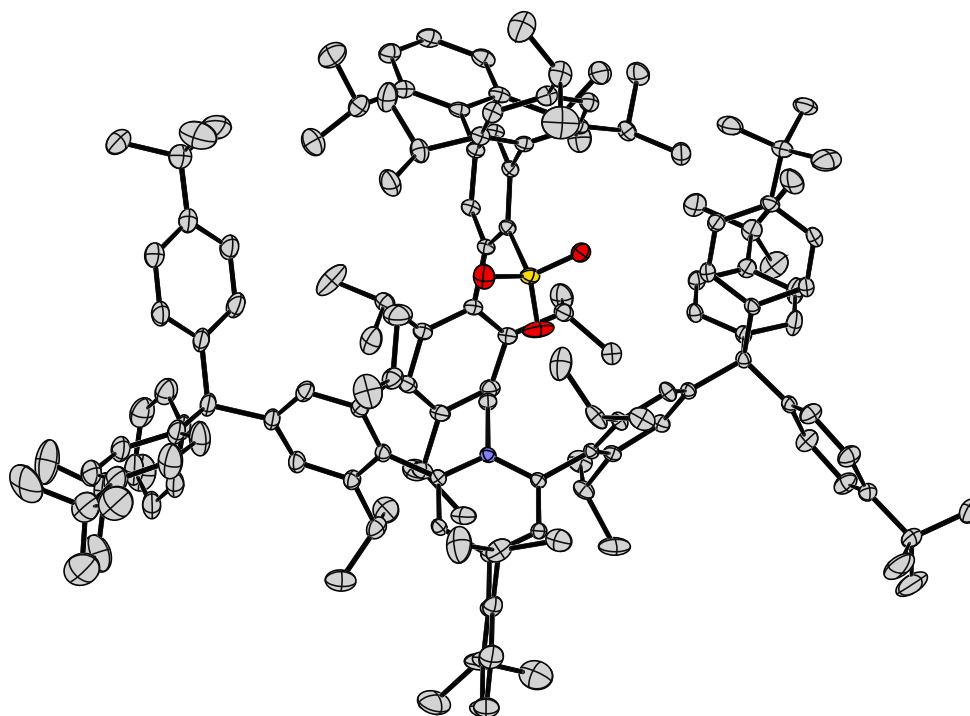

The asymmetric unit in the structure of **6** ( $C_{104}H_{132}N^+ C_{48}H_{65}O_3S^- \cdot 3.5(C_7H_8) \cdot H_2O$ ) contains one cation, one anion, one water molecule and 3.5 molecules of toluene, one of which is disordered across a centre of inversion, and a further two of which are also disordered. A disorder model for one of the latter toluene molecules could not be established, so the *SQUEEZE* routine of the program *PLATON*<sup>45</sup> was employed to account for this toluene molecule. Omission of this one toluene molecule leaves one cavity of 694 Å<sup>3</sup> per unit cell, centred about a centre of inversion. The total number of electrons contributing to this void in the unit cell was calculated by the *SQUEEZE* routine to be approximately 112 e. Several additional tiny voids are also present, but contain a zero electron count. Allowing for two molecules of toluene per void yields 100 e and this approximation was used in the subsequent calculation of the empirical formula, formula weight, density, linear absorption coefficient and F(000). Based on the assumption, the overall ratio of cations:anions:toluene:water is 1:1:3.5:1.

Two *t*-butyl groups in the cation are disordered over two orientations. Two sets of positions were defined for the atoms of each disordered *t*-butyl group and the site occupation factors of the major conformations of these groups refined to 0.706(6) and 0.897(4) for the disordered group at C(23) and C(33), respectively. Similarity restraints were applied to the chemically equivalent bond lengths and C...C distances involving all disordered C-atoms, while neighbouring atoms within and between each orientation of the disordered *t*-butyl groups were restrained to have similar and pseudo-isotropic atomic displacement parameters. For the modelled disordered toluene molecule in a general position, two sets of positions were defined for the atoms and the site occupation factor of the major orientation refined to 0.523(6). For the toluene molecule disordered about a centre of inversion, a single full molecule was defined with all atoms having a site occupation factor of 0.5; the inversion symmetry generating the other orientation of the molecule. For both disordered toluene molecules, the ring atoms were constrained to a perfect hexagon and, for

the toluene molecule in a general position, the ring-methyl C–C bonds were restrained to be similar. For all modelled toluene molecules, neighbouring atoms were restrained to have similar atomic displacement parameters. The non-hydrogen atoms were refined anisotropically. Only one potential position for a water H-atom could be located in a difference electron density map and its position was allowed to refine while applying an O–H distance restraint of 1.84(1) Å. The other water H-atom was not included in the model. A correction for secondary extinction was applied.

### Crystallographic data

|                                                   |                                                       |
|---------------------------------------------------|-------------------------------------------------------|
| Crystallised from                                 | toluene                                               |
| Empirical formula                                 | C <sub>176.5</sub> H <sub>227</sub> NO <sub>4</sub> S |
| Formula weight [g mol <sup>-1</sup> ]             | 2458.64                                               |
| Crystal colour, habit                             | colourless, prism                                     |
| Crystal dimensions [mm]                           | 0.05 × 0.06 × 0.13                                    |
| Temperature [K]                                   | 160(1)                                                |
| Crystal system                                    | triclinic                                             |
| Space group                                       | $P\bar{1}$ (#2)                                       |
| Z                                                 | 2                                                     |
| Reflections for cell determination                | 54954                                                 |
| 2 $\theta$ range for cell determination [°]       | 6–147                                                 |
| Unit cell parameters                              |                                                       |
| <i>a</i> [Å]                                      | 15.1995(2)                                            |
| <i>b</i> [Å]                                      | 15.9154(2)                                            |
| <i>c</i> [Å]                                      | 34.2180(5)                                            |
| $\alpha$ [°]                                      | 87.6311(11)                                           |
| $\beta$ [°]                                       | 79.9452(12)                                           |
| $\gamma$ [°]                                      | 73.6514(12)                                           |
| <i>V</i> [Å <sup>3</sup> ]                        | 7820.60(19)                                           |
| <i>F</i> (000)                                    | 2682                                                  |
| <i>D</i> <sub>x</sub> [g cm <sup>-3</sup> ]       | 1.044                                                 |
| $\mu$ (Cu <i>K</i> $\alpha$ ) [mm <sup>-1</sup> ] | 0.572                                                 |
| Scan type                                         | $\omega$                                              |
| 2 $\theta$ <sub>(max)</sub> [°]                   | 146.1                                                 |
| Transmission factors (min; max)                   | 0.882; 1.000                                          |
| Total reflections measured                        | 133077                                                |

|                                                 |                                                                                     |
|-------------------------------------------------|-------------------------------------------------------------------------------------|
| Symmetry independent reflections                | 30364                                                                               |
| $R_{\text{int}}$                                | 0.022                                                                               |
| Reflections with $I > 2\sigma(I)$               | 25964                                                                               |
| Reflections used in refinement                  | 30364                                                                               |
| Parameters refined; restraints                  | 1744; 512                                                                           |
| Final $R(F)$ [ $I > 2\sigma(I)$ reflections]    | 0.0546                                                                              |
| $wR(F^2)$ (all data)                            | 0.1659                                                                              |
| Weights:                                        | $w = [\sigma^2(F_o^2) + (0.0936P)^2 + 2.8180P]^{-1}$ where $P = (F_o^2 + 2F_c^2)/3$ |
| Goodness of fit                                 | 1.046                                                                               |
| Secondary extinction coefficient                | 0.00017(4)                                                                          |
| Final $\Delta_{\text{max}}/\sigma$              | 0.000                                                                               |
| $\Delta\rho$ (max; min) [ $\text{e \AA}^{-3}$ ] | 0.72; -0.50                                                                         |
| $\sigma(d_{(\text{c-c})})$ [ $\text{\AA}$ ]     | 0.0018 – 0.005                                                                      |

## Crystal structure of 7

view 1:

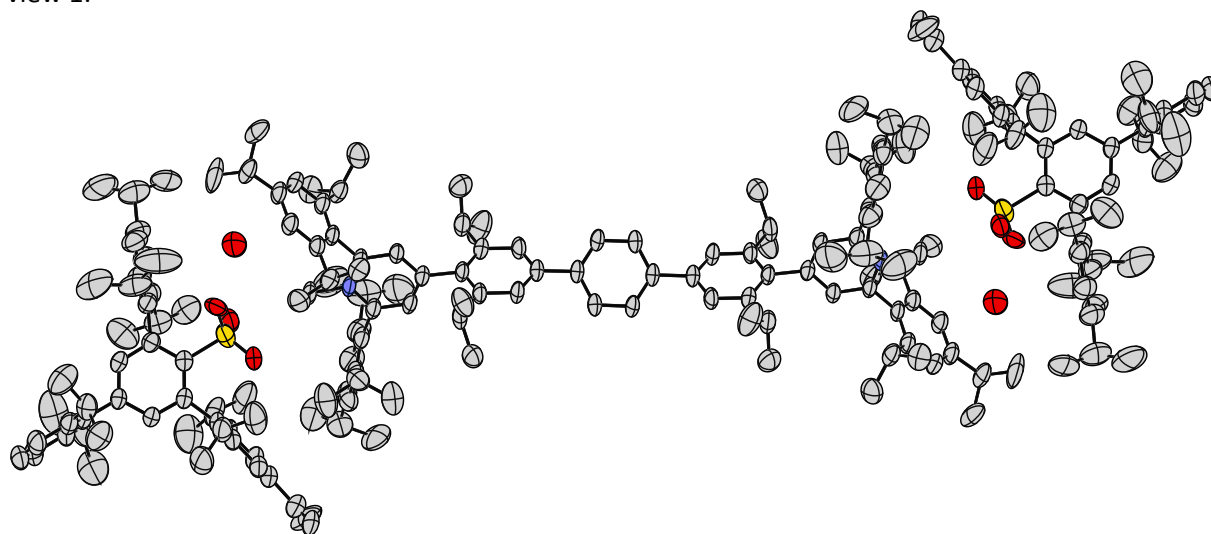

view 2:

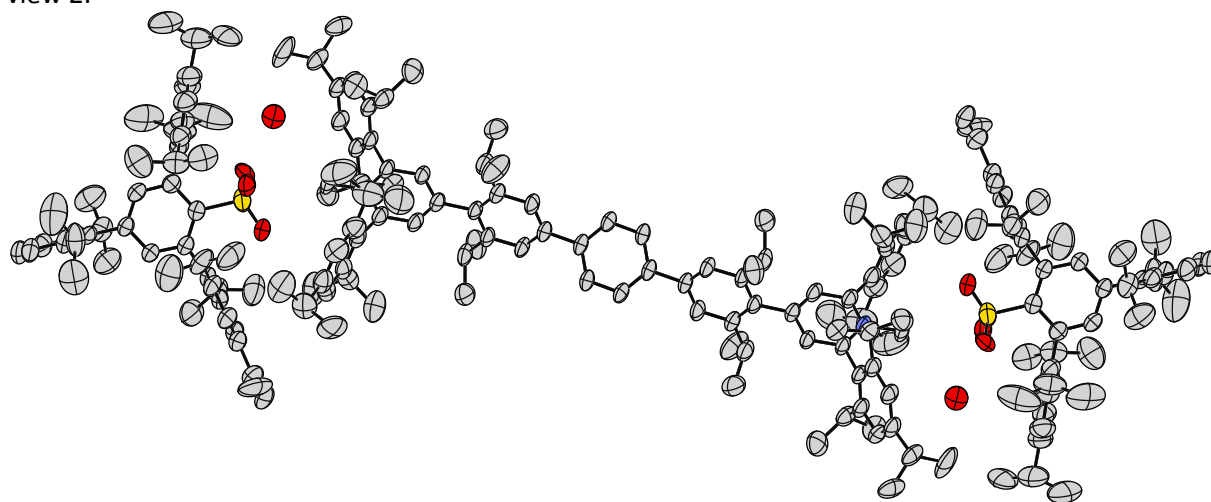

For the structure of **7** ( $C_{102}H_{138}N_2^{2+} (C_{48}H_{65}O_3S^-)_2 \cdot 7C_6H_6 \cdot 2H_2O$ ), the overall quality of the results is poorer than usual. This may in part be due to extensive disorder in the *i*Pr groups and several disordered solvent molecules of benzene. The asymmetric unit contains one half of a centrosymmetric cation, one anion, one water molecule and 3.5 disordered molecules of benzene, where one of these molecules sits across a crystallographic centre of inversion. Although the benzene molecules could be discerned clearly from the residual electron density peaks, they are quite disordered and the best refinement results were obtained when their contribution to the diffraction data was removed using the *SQUEEZE* routine of the program *PLATON*.<sup>45</sup> When the solvent molecules are excluded from the model, there is one centrosymmetric cavity of 843 Å<sup>3</sup> and one centrosymmetric cavity of 332 Å<sup>3</sup> per unit cell. The total number of electrons contributing to these voids was calculated by the *SQUEEZE* routine to be approximately 193 and 85 e, respectively. A benzene molecule has 42 e which suggests that the cavities have a total of seven molecules of benzene per unit cell (3.5 per asymmetric unit) and this approximation was used in the subsequent calculation of the empirical formula, formula weight, density, linear absorption coefficient and



F(000). Based on the assumption, the overall ratio of cations:anions:benzene:water is 1:2:7:2. Although there is probably some degree of disorder among most of the <sup>i</sup>Pr groups, disorder was modelled for just two <sup>i</sup>Pr groups as well as for the sulfonate O-atoms. Two sets of positions were defined for the atoms of each disordered group and the site occupation factors of the major conformations of these groups refined to 0.596(11), 0.658(12) (<sup>i</sup>Pr groups) and 0.537(10) (sulfonate O-atoms). Similarity restraints were applied to the chemically equivalent bond lengths involving all disordered atoms, as well as to the sulfonate O...O distances, while neighbouring atoms within and between each of the disordered conformations were restrained to have similar atomic displacement parameters. The H-atoms of the water molecule were placed in the positions indicated by a difference electron density map and the water molecule was refined as a rigid group. All other H-atoms were placed in geometrically calculated positions and refined using a riding model. A numerical absorption correction was applied.

### Crystallographic data

|                                             |                                                                                |
|---------------------------------------------|--------------------------------------------------------------------------------|
| Crystallised from                           | mesitylene / <i>n</i> -hexane / <i>n</i> -pentane / benzene                    |
| Empirical formula                           | C <sub>240</sub> H <sub>314</sub> N <sub>2</sub> O <sub>8</sub> S <sub>2</sub> |
| Formula weight [g mol <sup>-1</sup> ]       | 3419.03                                                                        |
| Crystal colour, habit                       | pale-yellow, prism                                                             |
| Crystal dimensions [mm]                     | 0.14 × 0.18 × 0.22                                                             |
| Temperature [K]                             | 160(1)                                                                         |
| Crystal system                              | triclinic                                                                      |
| Space group                                 | $P\bar{1}$ (#2)                                                                |
| Z                                           | 1                                                                              |
| Reflections for cell determination          | 24800                                                                          |
| 2 $\theta$ range for cell determination [°] | 5–146                                                                          |
| Unit cell parameters                        |                                                                                |
| <i>a</i> [Å]                                | 15.4354(4)                                                                     |
| <i>b</i> [Å]                                | 16.6547(5)                                                                     |
| <i>c</i> [Å]                                | 22.8322(6)                                                                     |
| $\alpha$ [°]                                | 83.077(2)                                                                      |
| $\beta$ [°]                                 | 78.545(2)                                                                      |
| $\gamma$ [°]                                | 66.641(3)                                                                      |
| <i>V</i> [Å <sup>3</sup> ]                  | 5275.4(3)                                                                      |
| <i>F</i> (000)                              | 1864                                                                           |
| <i>D</i> <sub>x</sub> [g cm <sup>-3</sup> ] | 1.076                                                                          |
| $\mu$ (Cu K $\alpha$ ) [mm <sup>-1</sup> ]  | 0.654                                                                          |

|                                                  |                                                                                     |
|--------------------------------------------------|-------------------------------------------------------------------------------------|
| Scan type                                        | $\omega$                                                                            |
| $2\theta_{(\max)}$ [°]                           | 146.5                                                                               |
| Transmission factors (min; max)                  | 0.614; 1.000                                                                        |
| Total reflections measured                       | 76688                                                                               |
| Symmetry independent reflections                 | 20551                                                                               |
| $R_{\text{int}}$                                 | 0.045                                                                               |
| Reflections with $I > 2\sigma(I)$                | 14687                                                                               |
| Reflections used in refinement                   | 20551                                                                               |
| Parameters refined; restraints                   | 1041; 159                                                                           |
| Final $R(F)$ [ $I > 2\sigma(I)$ reflections]     | 0.0951                                                                              |
| $wR(F^2)$ (all data)                             | 0.3180                                                                              |
| Weights:                                         | $w = [\sigma^2(F_o^2) + (0.1680P)^2 + 3.0737P]^{-1}$ where $P = (F_o^2 + 2F_c^2)/3$ |
| Goodness of fit                                  | 1.085                                                                               |
| Final $\Delta_{\text{max}}/\sigma$               | 0.000                                                                               |
| $\Delta\rho$ (max; min) [ $e \text{ \AA}^{-3}$ ] | 1.14; -0.42                                                                         |
| $\sigma(d_{(c-c)})$ [ $\text{\AA}$ ]             | 0.003 – 0.011                                                                       |

## Crystal structure of **9**

view 1:

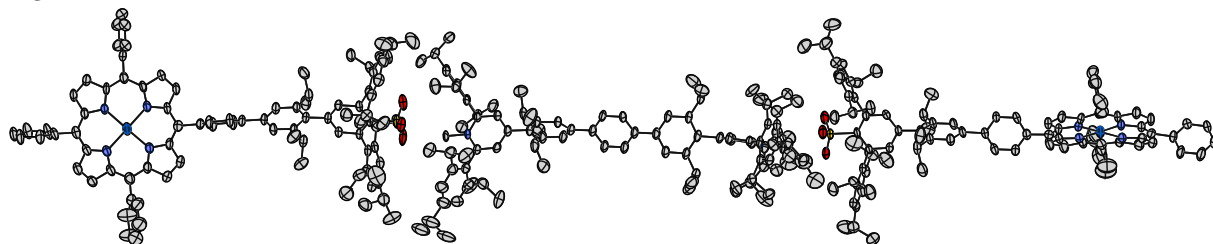

view 2:

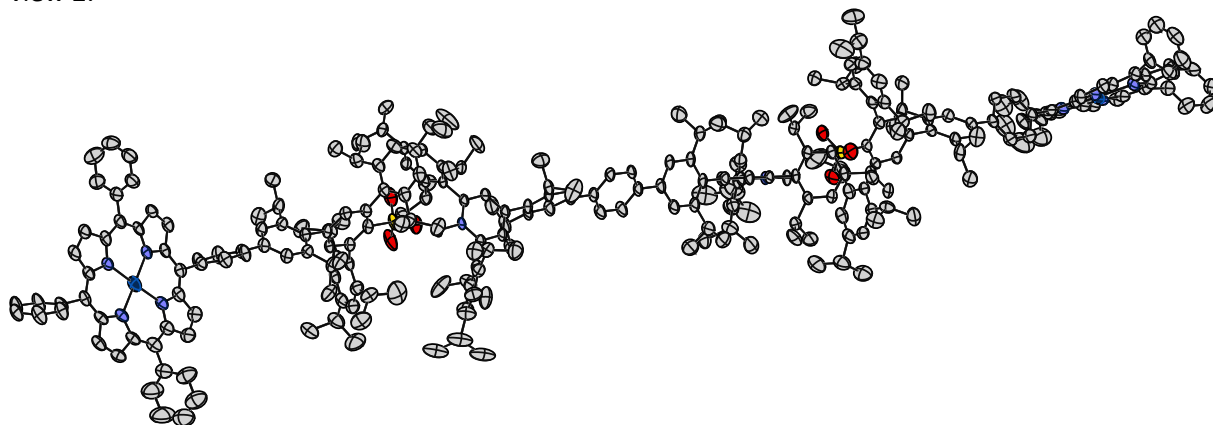

view 3:

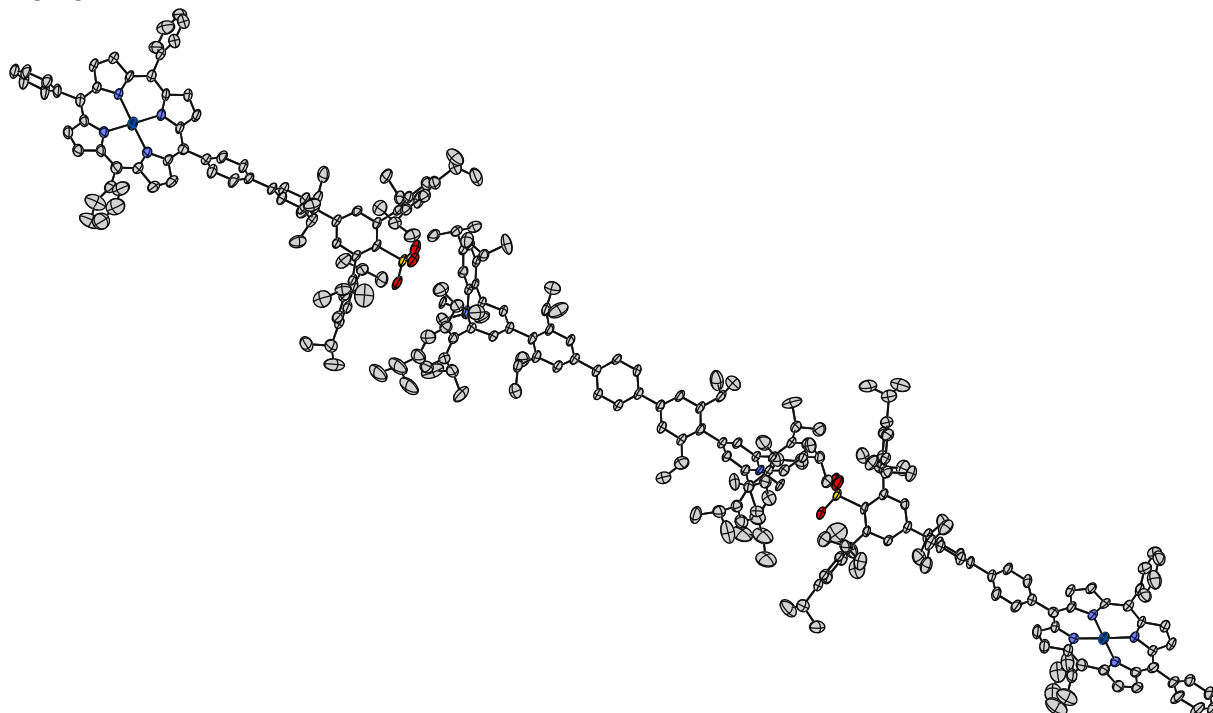

The crystal of **9**  $[\text{C}_{102}\text{H}_{138}\text{N}_2^{2+}][\text{C}_{92}\text{H}_{91}\text{N}_4\text{O}_3\text{PdS}^-]_2 \cdot 2(\text{H}_2\text{O}) \cdot 10(\text{C}_7\text{H}_8)$  was weakly diffracting and many of the high angle reflections have barely measurable intensities. Only data to a resolution of 0.90 Å was used during refinement. In addition, the crystal appeared to suffer decay during the latter part of the data collection, as was apparent from an increase in  $R_{\text{int}}$  and unstable frame scaling. A reasonable value for  $R_{\text{int}}$  and good frame scaling was obtained when only the first 15 of the 19 runs were used (3558 out of 4410

frames). Nonetheless, almost full completeness of the data to the desired resolution was attained. Overall, the final results are of modest quality. The geometries of the main species present are clearly defined, but the precision of the geometric parameters is modest and could be of limited accuracy where disorder has not been modelled. The asymmetric unit contains one half of a  $C_2$ -symmetric cation, one anion, one water molecule and an estimated five molecules of toluene. Only some of the toluene molecules were fully visible in difference electron density maps and, even then, they showed evidence of being disordered. Therefore, the contribution of all toluene solvent molecules to the diffraction data was removed using the *SQUEEZE* routine of the program *PLATON*.<sup>45</sup> When the solvent molecules are excluded from the model, there are two main cavities of 4806 Å<sup>3</sup> per unit cell. The total number of electrons contributing to each of these voids was calculated by the *SQUEEZE* routine to be approximately 1018 e. A toluene molecule has 50 e which suggests that each cavity contains twenty molecules of toluene (5 per asymmetric unit) and this approximation was used in the subsequent calculation of the empirical formula, formula weight, density, linear absorption coefficient and F(000). Based on the assumption, the overall ratio of cation:anion:water:toluene is 1:2:2:10. Some of the *i*Pr groups and porphyrin phenyl rings are probably disordered, but this disorder was only modelled for two of the *i*Pr groups. Two sets of positions were defined for the atoms of these two groups and the site occupation factors of the major conformations of the groups at C134 and C137 refined to 0.543(17) and 0.67(6), respectively. Similarity restraints were applied to the chemically equivalent bond lengths involving all disordered C-atoms, as well as to the C...C distances between the disordered terminal methyl C-atoms. Neighbouring atoms within and between each of the disordered conformations were restrained to have similar atomic displacement parameters. A numerical absorption correction was applied.

### Crystallographic data

|                                       |                                                                                                 |
|---------------------------------------|-------------------------------------------------------------------------------------------------|
| Crystallised from                     | toluene / <i>n</i> -heptane                                                                     |
| Empirical formula                     | C <sub>356</sub> H <sub>404</sub> N <sub>10</sub> O <sub>8</sub> Pd <sub>2</sub> S <sub>2</sub> |
| Formula weight [g mol <sup>-1</sup> ] | 5227.79                                                                                         |
| Crystal colour, habit                 | red, plate                                                                                      |
| Crystal dimensions [mm]               | 0.07 × 0.11 × 0.43                                                                              |
| Temperature [K]                       | 160(1)                                                                                          |
| Crystal system                        | monoclinic                                                                                      |
| Space group                           | <i>I</i> 2/ <i>a</i> (#15)                                                                      |
| <i>Z</i>                              | 4                                                                                               |
| Reflections for cell determination    | 38697                                                                                           |
| 2θ range for cell determination [°]   | 4–147                                                                                           |
| Unit cell parameters                  |                                                                                                 |
| <i>a</i> [Å]                          | 31.1028(2)                                                                                      |
| <i>b</i> [Å]                          | 23.6402(2)                                                                                      |

|                                               |                                                                           |
|-----------------------------------------------|---------------------------------------------------------------------------|
| $c$ [Å]                                       | 44.8209(5)                                                                |
| $\alpha$ [°]                                  | 90                                                                        |
| $\beta$ [°]                                   | 104.6052(9)                                                               |
| $\gamma$ [°]                                  | 90                                                                        |
| $V$ [Å <sup>3</sup> ]                         | 31890.8(5)                                                                |
| $F(000)$                                      | 11192                                                                     |
| $D_x$ [g cm <sup>-3</sup> ]                   | 1.089                                                                     |
| $\mu(\text{Cu } K\alpha)$ [mm <sup>-1</sup> ] | 1.465                                                                     |
| Scan type                                     | $\omega$                                                                  |
| $2\theta_{(\text{max})}$ [°]                  | 133.2                                                                     |
| Transmission factors (min; max)               | 0.273; 1.000                                                              |
| Total reflections measured                    | 120757                                                                    |
| Symmetry independent reflections              | 28085                                                                     |
| $R_{\text{int}}$                              | 0.039                                                                     |
| Reflections with $I > 2\sigma(I)$             | 18077                                                                     |
| Reflections used in refinement                | 28085                                                                     |
| Parameters refined; restraints                | 1462; 82                                                                  |
| Final $R(F)$ [ $I > 2\sigma(I)$ reflections]  | 0.1025                                                                    |
| $wR(F^2)$ (all data)                          | 0.3605                                                                    |
| Weights:                                      | $w = [\sigma^2(F_o^2) + (0.2000P)^2]^{-1}$ where $P = (F_o^2 + 2F_c^2)/3$ |
| Goodness of fit                               | 1.372                                                                     |
| Final $\Delta_{\text{max}}/\sigma$            | 0.001                                                                     |
| $\Delta\rho$ (max; min) [e Å <sup>-3</sup> ]  | 1.99; -1.58                                                               |
| $\sigma(d_{(\text{c-c})})$ [Å]                | 0.006 – 0.016                                                             |

## Crystal structure of 10

view 1:

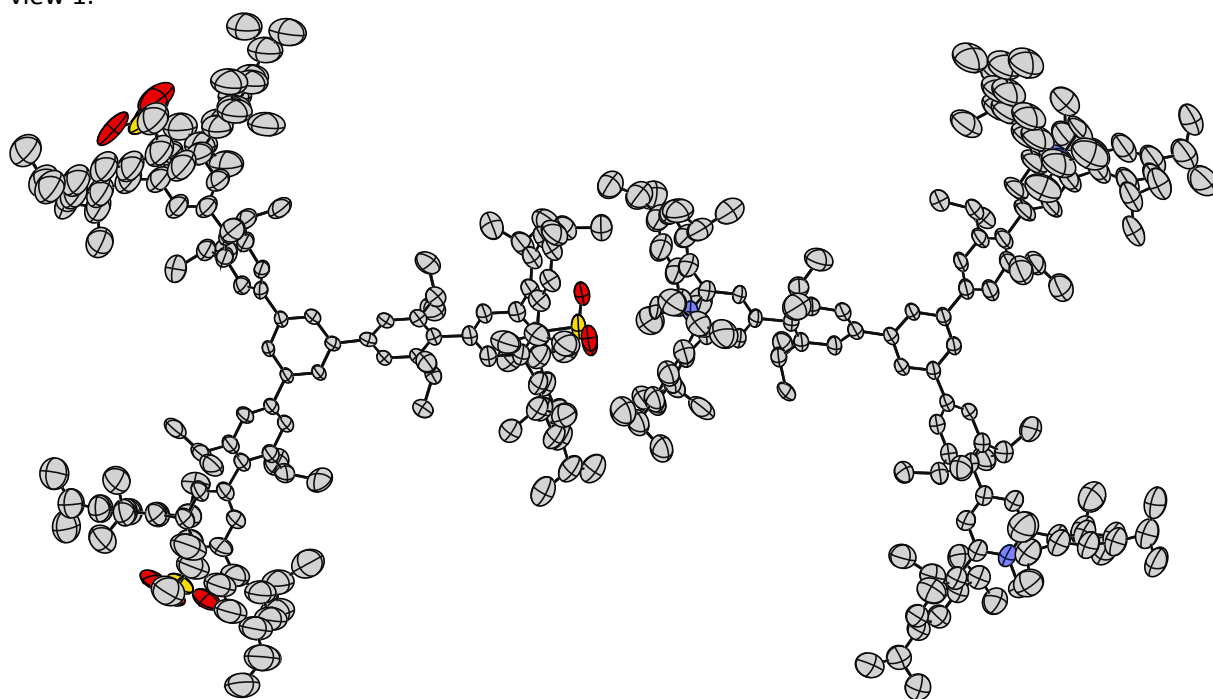

view 2:

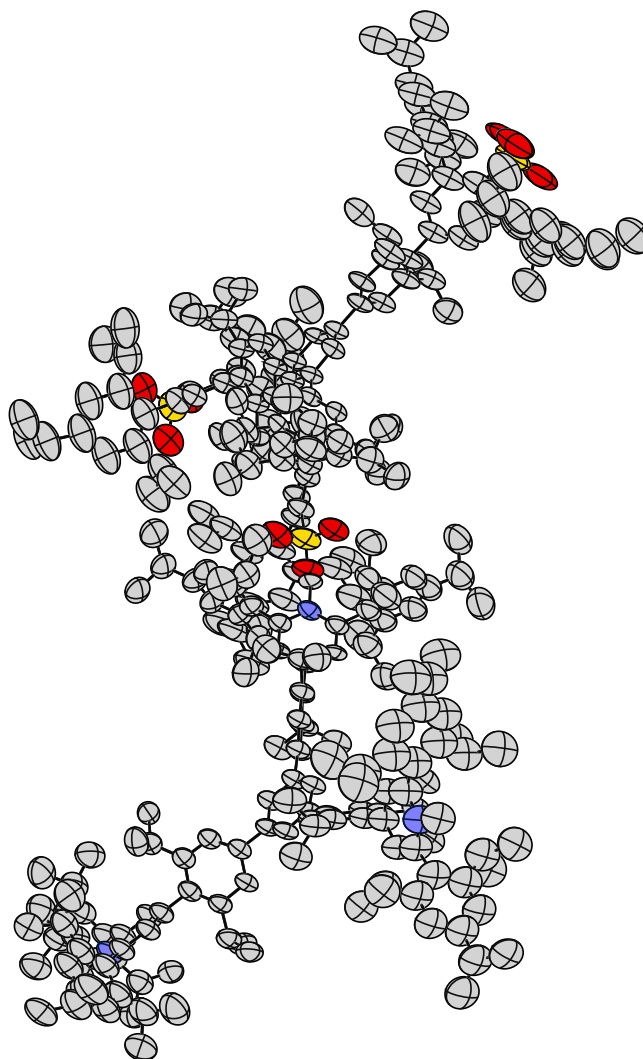

view 3:

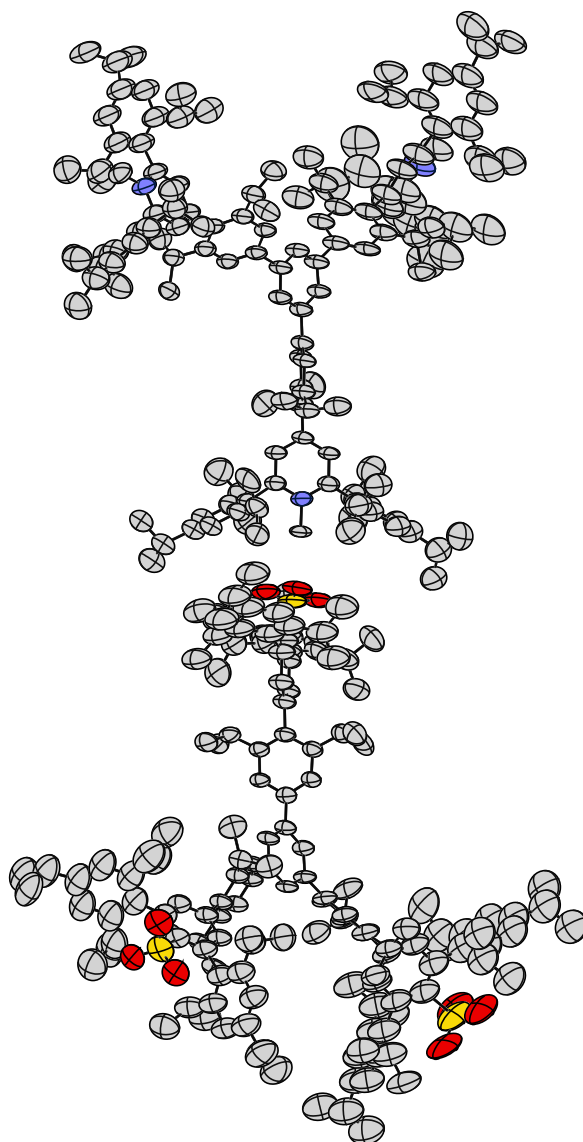

view 4 (hexagon):

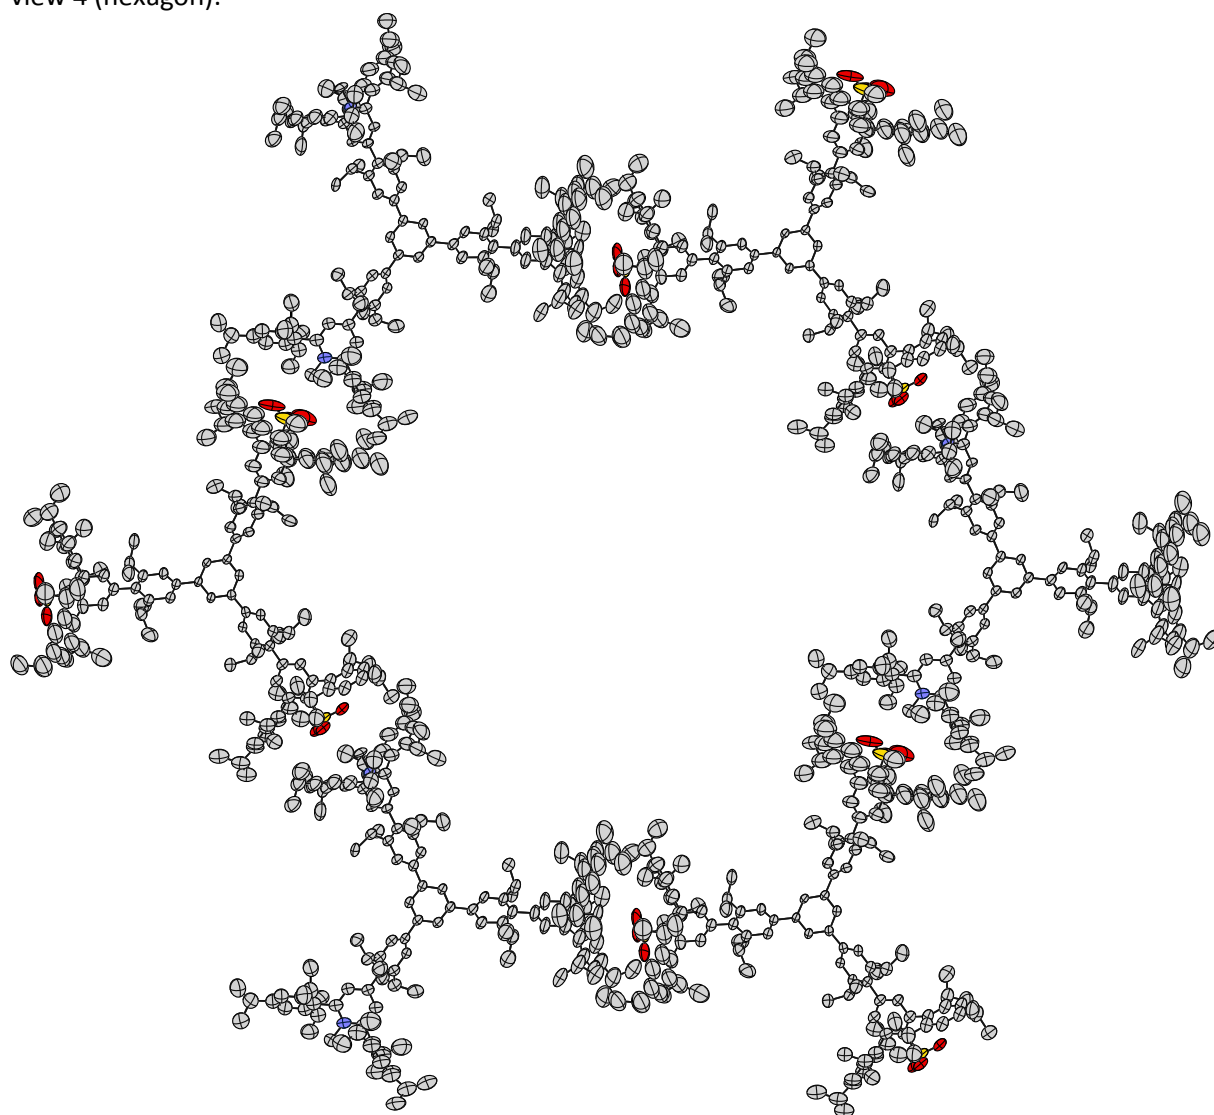

view 5 (hexagon):

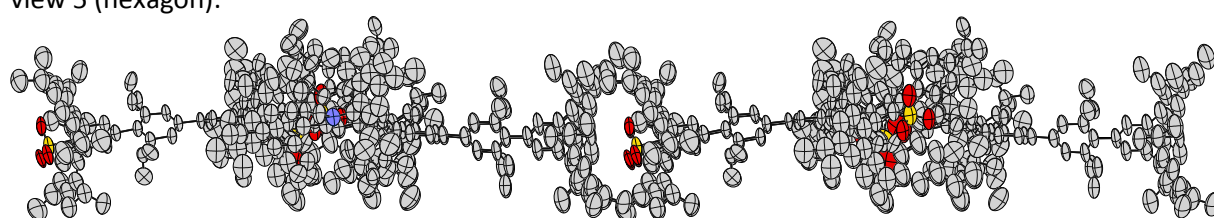



Crystal packing in **10**, (100) view:

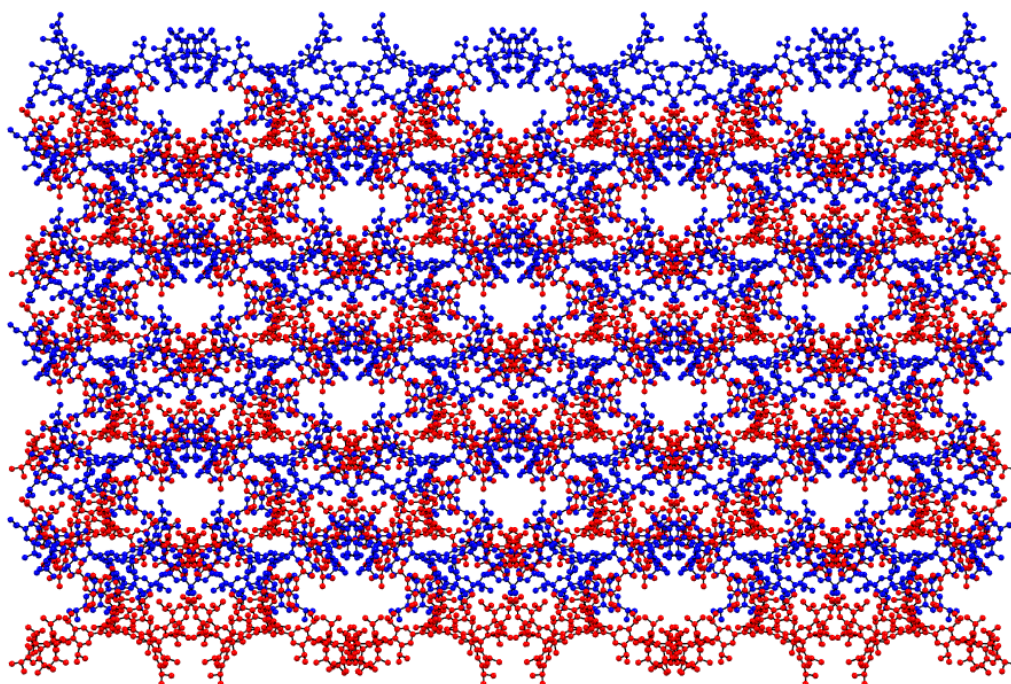

Crystal packing in **10**, (010) view:

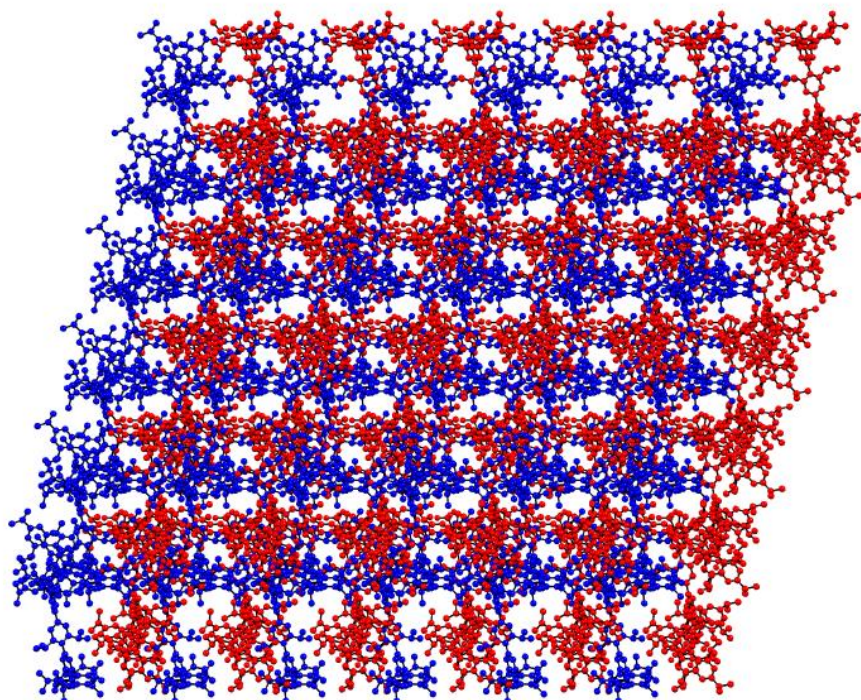

Crystal packing in **10**, (001) view:

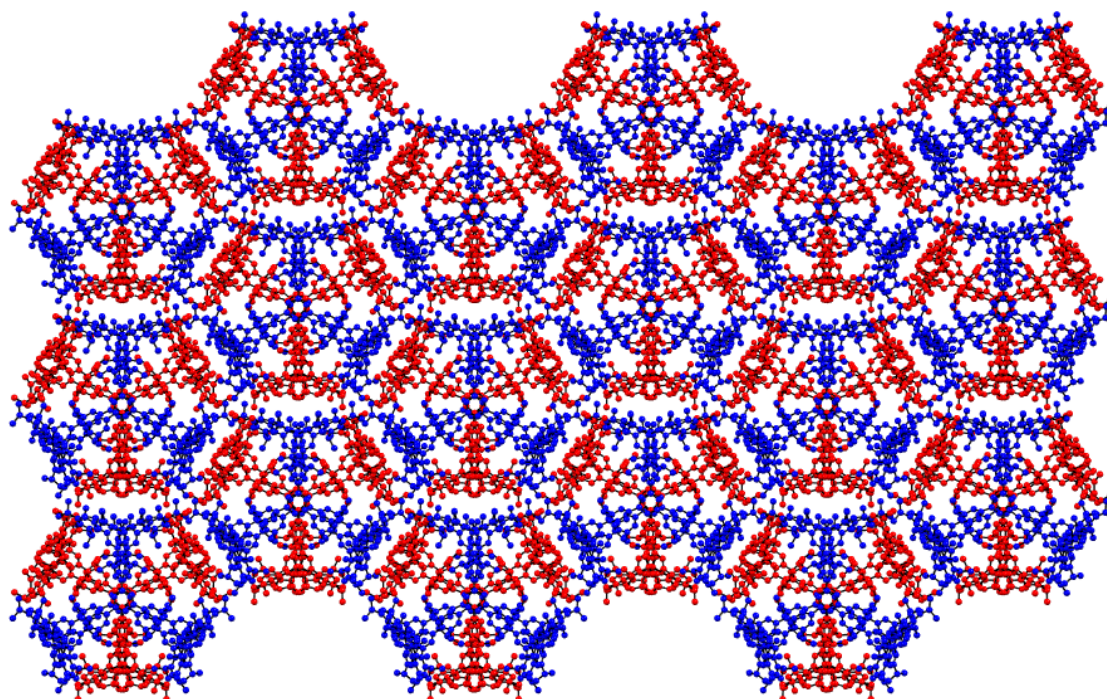

The structure **10** ( $C_{150}H_{204}N_3^+ C_{150}H_{195}O_9S_3^-$  [+ solvent]) has been solved and refined successfully, albeit the overall quality of the results is modest. All crystals tried were very weakly diffracting, despite a good size, because of the very large cavities with disordered solvent and disorder of some arms of the ions. For the best crystal tried, for which the results are reported here, no diffraction was observed at all beyond a resolution of 1.10 Å, so the data were truncated at this resolution. The space group is non-centrosymmetric, but achiral, because of the presence of glide planes. The absolute structure has been determined by the diffraction experiment and indicates that the chosen crystal was a partial inversion twin. Two of the three sulfonate groups have been modelled as disordered with two positions for each of the O-atoms. All rings outside the central four of each ion were constrained to be perfect hexagons. All chemically equivalent C–C bonds between the rings, C(methyl)–N bonds, S–O bonds, O···O distances within the sulfonate groups, and C–C bonds involving isopropyl groups were restrained to be of similar length (SADI restraints). All non-H atoms were restrained to have similar atomic displacement parameters to those of their immediate neighbours (SIMU restraints). Anti-bumping restraints were used to prevent unreasonably short intra- and intermolecular H···H contacts and to generally stabilise the refinement convergence and the geometry of the isopropyl groups. A solvent mask was used to account for the highly diffuse electron density in the solvent accessible voids in the structure, with 2563 electrons accounted for, 2545 of which occurred in one large void per unit cell of 10828 Å<sup>3</sup>. This corresponds with approximately 8.5 molecules of trifluorotoluene per asymmetric unit. The absence of large residual electron density peaks before applying the solvent mask suggests that there is no CH<sub>2</sub>Cl<sub>2</sub> in the solvent region.

**Crystallographic data:**

|                                                   |                                                                                                                                     |
|---------------------------------------------------|-------------------------------------------------------------------------------------------------------------------------------------|
| Crystallised from                                 | trifluorotoluene / CH <sub>2</sub> Cl <sub>2</sub>                                                                                  |
| Empirical formula                                 | C <sub>300</sub> H <sub>399</sub> N <sub>3</sub> O <sub>9</sub> S <sub>3</sub> [+ 8.5C <sub>7</sub> H <sub>5</sub> F <sub>3</sub> ] |
| Formula weight [g mol <sup>-1</sup> ]             | 5529.31                                                                                                                             |
| Crystal colour, habit                             | colourless, block                                                                                                                   |
| Crystal dimensions [mm]                           | 0.12 × 0.16 × 0.22                                                                                                                  |
| Temperature [K]                                   | 160(1)                                                                                                                              |
| Crystal system                                    | monoclinic                                                                                                                          |
| Space group                                       | <i>Ia</i> (#9)                                                                                                                      |
| Z                                                 | 4                                                                                                                                   |
| Reflections for cell determination                | 22453                                                                                                                               |
| 2 $\theta$ range for cell determination [°]       | 5–90                                                                                                                                |
| Unit cell parameters                              |                                                                                                                                     |
| <i>a</i> [Å]                                      | 26.4108(3)                                                                                                                          |
| <i>b</i> [Å]                                      | 46.3352(5)                                                                                                                          |
| <i>c</i> [Å]                                      | 28.9924(6)                                                                                                                          |
| $\alpha$ [°]                                      | 90                                                                                                                                  |
| $\beta$ [°]                                       | 104.7669(16)                                                                                                                        |
| $\gamma$ [°]                                      | 90                                                                                                                                  |
| <i>V</i> [Å <sup>3</sup> ]                        | 34307.6(9)                                                                                                                          |
| <i>F</i> (000)                                    | 11876                                                                                                                               |
| <i>D</i> <sub>x</sub> [g cm <sup>-3</sup> ]       | 1.071                                                                                                                               |
| $\mu$ (Cu <i>K</i> $\alpha$ ) [mm <sup>-1</sup> ] | 0.740                                                                                                                               |
| Scan type                                         | $\omega$                                                                                                                            |
| 2 $\theta$ <sub>(max)</sub> [°]                   | 89.2                                                                                                                                |
| Transmission factors (min; max)                   | 0.826; 1.000                                                                                                                        |
| Total reflections measured                        | 41157                                                                                                                               |
| Symmetry independent reflections                  | 22731                                                                                                                               |
| <i>R</i> <sub>int</sub>                           | 0.023                                                                                                                               |
|                                                   | S275                                                                                                                                |

|                                              |             |
|----------------------------------------------|-------------|
| Reflections with $I > 2\sigma(I)$            | 19530       |
| Reflections used in refinement               | 22731       |
| Parameters refined; restraints               | 2677; 16148 |
| Final $R(F)$ [ $I > 2\sigma(I)$ reflections] | 0.1049      |
| $wR(F^2)$ (all data)                         | 0.2935      |

Weights:  $w = [\sigma^2(F_o^2) + (0.2P)^2]^{-1}$  where  $P = (F_o^2 + 2F_c^2)/3$

|                                                  |               |
|--------------------------------------------------|---------------|
| Goodness of fit                                  | 1.335         |
| Final $\Delta_{\max}/\sigma$                     | 0.003         |
| $\Delta\rho$ (max; min) [ $e \text{ \AA}^{-3}$ ] | 0.52; -0.28   |
| $\sigma(d_{(c-c)})$ [ $\text{\AA}$ ]             | 0.005 – 0.017 |

## 4 Supplementary References

- (1) Pettersen, E. F.; Goddard, T. D.; Huang, C. C.; Couch, G. S.; Greenblatt, D. M.; Meng, E. C.; Ferrin, T. E. UCSF Chimera – A Visualization System for Exploratory Research and Analysis. *J. Comput. Chem.* **2004**, *25*, 1605–1612. <https://doi.org/10.1002/jcc.20084>.
- (2) Voss, N. R.; Gerstein, M. 3V: Cavity, Channel and Cleft Volume Calculator and Extractor. *Nucleic Acid. Res.* **2010**, *38*, W555–W562. <https://doi.org/10.1093/nar/gkq395>.
- (3) Ämmälähti, E.; Bardet, M.; Molko, D.; Cadet, J. Evaluation of Distances from ROESY Experiments with the Intensity-Ratio Method. *J. Magn. Reson. A* **1996**, *122*, 230–232. <https://doi.org/10.1006/jmra.1996.0199>.
- (4) Bruno, I. J.; Cole, J. C.; Edgington, P. R.; Kessler, M.; Macrae, C. F.; McCabe, P.; Pearson, J.; Taylor, R. New Software for Searching the Cambridge Structural Database and Visualizing Crystal Structures. *Acta Crystallogr. Sect. B Struct. Sci.* **2002**, *58*, 389–397. <https://doi.org/10.1107/S0108768102003324>.
- (5) Chemcraft - Graphical Software for Visualization of Quantum Chemistry Computations. <https://www.chemcraftprog.com> (accessed 2023-01-24).
- (6) Knorr, R.; Ruhdorfer, J.; Böhrer, P.; Bronberger, H.; Räßle, E. Sterically Congested Molecules, 11. The 2,6-Diisopropylphenyl Substituent at C=C and C=N Groups. *Liebigs Ann. der Chemie* **1994**, *1994*, 433–438. <https://doi.org/10.1002/jlac.199419940417>.
- (7) Li, G.; Han, A.; Pulling, M. E.; Estes, D. P.; Norton, J. R. Evidence for Formation of a Co-H Bond from (H<sub>2</sub>O)<sub>2</sub>Co(DmgBF<sub>2</sub>)<sub>2</sub> under H<sub>2</sub>: Application to Radical Cyclizations. *J. Am. Chem. Soc.* **2012**, *134*, 14662–14665. <https://doi.org/10.1021/ja306037w>.
- (8) Dible, B. R.; Cowley, R. E.; Holland, P. L. Remote Substitution on N-Heterocyclic Carbenes Heightens the Catalytic Reactivity of Their Palladium Complexes. *Organometallics* **2011**, *30*, 5123–5132. <https://doi.org/10.1021/om200349y>.
- (9) Hondros, C. J.; Aravindu, K.; Diers, J. R.; Holten, D.; Lindsey, J. S.; Bocian, D. F. Effects of Linker Torsional Constraints on the Rate of Ground-State Hole Transfer in Porphyrin Dyads. *Inorg. Chem.* **2012**, *51*, 11076–11086. <https://doi.org/10.1021/ic301613k>.
- (10) Dhankhar, J.; González-Fernández, E.; Dong, C.-C.; Mukhopadhyay, T. K.; Linden, A.; Čorić, I. Spatial Anion Control on Palladium for Mild C–H Arylation of Arenes. *J. Am. Chem. Soc.* **2020**, *142*, 19040–19046. <https://doi.org/10.1021/jacs.0c09611>.
- (11) Chen, H. C.; Chen, S. H. Diffusion of Crown Ethers in Alcohols. *J. Phys. Chem.* **1984**, *88*, 5118–5121. <https://doi.org/10.1021/j150665a063>.
- (12) Zhao, Y. H.; Abraham, M. H.; Zissimos, A. M. Fast Calculation of van der Waals Volume as a Sum of Atomic and Bond Contributions and Its Application to Drug Compounds. *J. Org. Chem.* **2003**, *68*, 7368–7373. <https://doi.org/10.1021/jo034808o>.
- (13) Schulze, B. M.; Watkins, D. L.; Zhang, J.; Ghiviriga, I.; Castellano, R. K. Estimating the Shape and Size of Supramolecular Assemblies by Variable Temperature Diffusion Ordered Spectroscopy. *Org. Biomol. Chem.* **2014**, *12*, 7932–7936. <https://doi.org/10.1039/C4OB01373E>.

- (14) Pfeuffer-Rooschütz, J.; Schmid, L.; Prescimone, A.; Tiefenbacher, K. Xanthene[n]Arenes: Exceptionally Large, Bowl-Shaped Macrocyclic Building Blocks Suitable for Self-Assembly. *JACS Au* **2021**, *1*, 1885–1891. <https://doi.org/10.1021/jacsau.1c00343>.
- (15) Beaudoin, D.; Rominger, F.; Mastalerz, M. Chirality-Assisted Synthesis of a Very Large Octameric Hydrogen-Bonded Capsule. *Angew. Chem. Int. Ed.* **2016**, *55*, 15599–15603. <https://doi.org/10.1002/anie.201609073>.
- (16) Qiu, Y.; Song, B.; Pezzato, C.; Shen, D.; Liu, W.; Zhang, L.; Feng, Y.; Guo, Q.-H.; Cai, K.; Li, W.; Chen, H.; Nguyen, M. T.; Shi, Y.; Cheng, C.; Astumian, R. D.; Li, X.; Stoddart, J. F. A Precise Polyrotaxane Synthesizer. *Science* **2020**, *368*, 1247–1253. <https://doi.org/10.1126/science.abb3962>.
- (17) Frisch, M. J.; Trucks, G. W.; Schlegel, H. B.; Scuseria, G. E.; Robb, M. A.; Cheeseman, J. R.; Scalmani, G.; Barone, V.; Petersson, G. A.; Nakatsuji, H.; Li, X.; Caricato, M.; Marenich, A. v; Bloino, J.; Janesko, B. G.; Gomperts, R.; Mennucci, B.; Hratchian, H. P.; Ortiz, J. v; Izmaylov, A. F.; Sonnenberg, J. L.; Williams-Young, D.; Ding, F.; Lipparini, F.; Egidi, F.; Goings, J.; Peng, B.; Petrone, A.; Henderson, T.; Ranasinghe, D.; Zakrzewski, V. G.; Gao, J.; Rega, N.; Zheng, G.; Liang, W.; Hada, M.; Ehara, M.; Toyota, K.; Fukuda, R.; Hasegawa, J.; Ishida, M.; Nakajima, T.; Honda, Y.; Kitao, O.; Nakai, H.; Vreven, T.; Throssell, K.; Montgomery Jr., J. A.; Peralta, J. E.; Ogliaro, F.; Bearpark, M. J.; Heyd, J. J.; Brothers, E. N.; Kudin, K. N.; Staroverov, V. N.; Keith, T. A.; Kobayashi, R.; Normand, J.; Raghavachari, K.; Rendell, A. P.; Burant, J. C.; Iyengar, S. S.; Tomasi, J.; Cossi, M.; Millam, J. M.; Klene, M.; Adamo, C.; Cammi, R.; Ochterski, J. W.; Martin, R. L.; Morokuma, K.; Farkas, O.; Foresman, J. B.; Fox, D. J. Gaussian 16 Revision C.01. (2016).
- (18) Luchini, G.; Alegre-Requena, J. V.; Funes-Ardoiz, I.; Paton, R. S. GoodVibes: Automated Thermochemistry for Heterogeneous Computational Chemistry Data. *F1000Res* **2020**, *9*, 291. <https://doi.org/10.12688/f1000research.22758.1>.
- (19) Grimme, S. Supramolecular Binding Thermodynamics by Dispersion-Corrected Density Functional Theory. *Chem. Eur. J.* **2012**, *18*, 9955–9964. <https://doi.org/10.1002/chem.201200497>.
- (20) Barone, V.; Cossi, M. Quantum Calculation of Molecular Energies and Energy Gradients in Solution by a Conductor Solvent Model. *J. Phys. Chem. A* **1998**, *102*, 1995–2001. <https://doi.org/10.1021/jp9716997>.
- (21) Cossi, M.; Rega, N.; Scalmani, G.; Barone, V. Energies, Structures, and Electronic Properties of Molecules in Solution with the C-PCM Solvation Model. *J. Comput. Chem.* **2003**, *24*, 669–681. <https://doi.org/10.1002/jcc.10189>.
- (22) Liu, Y.; Sengupta, A.; Raghavachari, K.; Flood, A. H. Anion Binding in Solution: Beyond the Electrostatic Regime. *Chem* **2017**, *3*, 411–427. <https://doi.org/10.1016/j.chempr.2017.08.003>.
- (23) Humphrey, W.; Dalke, A.; Schulten, K. VMD - Visual Molecular Dynamics. *J. Mol. Graph.* **1996**, *14*, 33–38.
- (24) Legault, C. Y. CYLview20. Université de Sherbrooke (2020). Université de Sherbrooke. <http://www.cylview.org>.
- (25) Hohenstein, E. G.; Sherrill, C. D. Wavefunction Methods for Noncovalent Interactions. *WIREs Comput. Mol. Sci.* **2012**, *2*, 304–326. <https://doi.org/10.1002/wcms.84>.
- (26) Szalewicz, K. Symmetry-Adapted Perturbation Theory of Intermolecular Forces. *WIREs Comput. Mol. Sci.* **2012**, *2*, 254–272. <https://doi.org/10.1002/wcms.86>.

- (27) Hohenstein, E. G.; Parrish, R. M.; Sherrill, C. D.; Turney, J. M.; Schaefer, H. F., III Large-Scale Symmetry-Adapted Perturbation Theory Computations via Density Fitting and Laplace Transformation Techniques: Investigating the Fundamental Forces of DNA-Intercalator Interactions. *J. Chem. Phys.* **2011**, *135*, 174107. <https://doi.org/10.1063/1.3656681>.
- (28) Hohenstein, E. G.; Sherrill, C. D. Density Fitting and Cholesky Decomposition Approximations in Symmetry-Adapted Perturbation Theory: Implementation and Application to Probe the Nature of  $\pi$ - $\pi$  Interactions in Linear Acenes. *J. Chem. Phys.* **2010**, *132*, 184111. <https://doi.org/10.1063/1.3426316>.
- (29) Smith, D. G. A.; Burns, L. A.; Simmonett, A. C.; Parrish, R. M.; Schieber, M. C.; Galvelis, R.; Kraus, P.; Kruse, H.; Di Remigio, R.; Alenaizan, A.; James, A. M.; Lehtola, S.; Misiewicz, J. P.; Scheurer, M.; Shaw, R. A.; Schriber, J. B.; Xie, Y.; Glick, Z. L.; Sirianni, D. A.; O'Brien, J. S.; Waldrop, J. M.; Kumar, A.; Hohenstein, E. G.; Pritchard, B. P.; Brooks, B. R.; Schaefer, H. F., III; Sokolov, A. Yu.; Patkowski, K.; DePrince, A. E.; Bozkaya, U.; King, R. A.; Evangelista, F. A.; Turney, J. M.; Crawford, T. D.; Sherrill, C. D. Psi4 1.4: Open-Source Software for High-Throughput Quantum Chemistry. *J. Chem. Phys.* **2020**, *152*, 184108. <https://doi.org/10.1063/5.0006002>.
- (30) Wadt, W. R.; Hay, P. J. *Ab Initio* Effective Core Potentials for Molecular Calculations. Potentials for Main Group Elements Na to Bi. *J. Chem. Phys.* **1985**, *82*, 284–298. <https://doi.org/10.1063/1.448800>.
- (31) Roy, L. E.; Hay, P. J.; Martin, R. L. Revised Basis Sets for the LANL Effective Core Potentials. *J. Chem. Theory Comput.* **2008**, *4*, 1029–1031. <https://doi.org/10.1021/ct8000409>.
- (32) Hay, P. J.; Wadt, W. R. *Ab Initio* Effective Core Potentials for Molecular Calculations. Potentials for K to Au Including the Outermost Core Orbitals. *J. Chem. Phys.* **1985**, *82*, 299–310. <https://doi.org/10.1063/1.448975>.
- (33) Ehlers, A. W.; Böhme, M.; Dapprich, S.; Gobbi, A.; Höllwarth, A.; Jonas, V.; Köhler, K. F.; Stegmann, R.; Veldkamp, A.; Frenking, G. A Set of F-Polarization Functions for Pseudo-Potential Basis Sets of the Transition Metals Sc-Cu, Y-Ag and La-Au. *Chem. Phys. Lett.* **1993**, *208*, 111–114. [https://doi.org/10.1016/0009-2614\(93\)80086-5](https://doi.org/10.1016/0009-2614(93)80086-5).
- (34) Rigaku Oxford Diffraction, CrysAlisPro Software System. (a) Rigaku Oxford Diffraction: Abingdon, Oxfordshire, England 2017. (b) Rigaku Corporation: Wroclaw, Poland 2018. (c) Rigaku Corporation: Oxford, UK 2021. (d) Rigaku Corporation: Oxford, UK 2022. Rigaku Oxford Diffraction: Abingdon, Oxfordshire, England.
- (35) Coppens, P.; Leiserowitz, L.; Rabinovich, D. Calculation of Absorption Corrections for Camera and Diffractometer Data. *Acta Crystallogr.* **1965**, *18*, 1035–1038. <https://doi.org/10.1107/S0365110X65002487>.
- (36) Sheldrick, G. M. SHELXT – Integrated Space-Group and Crystal-Structure Determination. *Acta Crystallogr. Sect. A Found. Adv.* **2015**, *71*, 3–8. <https://doi.org/10.1107/S2053273314026370>.
- (37) Maslen, E. N.; Fox, A. G.; O'Keefe, M. A. Table 6.1.1.1. In *International Tables for Crystallography*; Wilson, A. J., Ed.; Kluwer Academic Publishers: Dordrecht, 1992; Vol. C, Pp 477–486.
- (38) Stewart, R. F.; Davidson, E. R.; Simpson, W. T. Coherent X-Ray Scattering for the Hydrogen Atom in the Hydrogen Molecule. *J. Chem. Phys.* **1965**, *42*, 3175–3187.
- (39) Ibers, J. A.; Hamilton, W. C. Dispersion Corrections and Crystal Structure Refinements. *Acta Crystallogr.* **1964**, *17*, 781–782. <https://doi.org/10.1107/S0365110X64002067>.

- (40) Creagh, D. C.; McAuley, W. J. Table 4.2.6.8. In *International Tables for Crystallography*; Wilson, A. J., Ed.; Kluwer Academic Publishers: Dordrecht, 1992; Pp 219–222.
- (41) Creagh, D. C.; Hubbel, J. H. Table 4.2.4.3. In *International Tables for Crystallography*; Wilson, A. J., Ed.; Kluwer Academic Publishers: Dordrecht, 1992; Pp 200–206.
- (42) Sheldrick, G. M. Crystal Structure Refinement with SHELXL. *Acta Crystallogr. C Struct. Chem.* **2015**, *71*, 3–8. <https://doi.org/10.1107/S2053229614024218>.
- (43) Macrae, C. F.; Sovago, I.; Cottrell, S. J.; Galek, P. T. A.; McCabe, P.; Pidcock, E.; Platings, M.; Shields, G. P.; Stevens, J. S.; Towler, M.; Wood, P. A. Mercury 4.0 : From Visualization to Analysis, Design and Prediction. *J. Appl. Crystallogr.* **2020**, *53*, 226–235. <https://doi.org/10.1107/S1600576719014092>.
- (44) Farrugia, L. J. WinGX and ORTEP for Windows : An Update. *J. Appl. Crystallogr.* **2012**, *45*, 849–854. <https://doi.org/10.1107/S0021889812029111>.
- (45) Spek, A. L. PLATON SQUEEZE: A Tool for the Calculation of the Disordered Solvent Contribution to the Calculated Structure Factors. *Acta Crystallogr. C Struct. Chem.* **2015**, *71*, 9–18. <https://doi.org/10.1107/S2053229614024929>.
- (46) Parsons, S.; Flack, H. D.; Wagner, T. Use of Intensity Quotients and Differences in Absolute Structure Refinement. *Acta Crystallogr. B Struct. Sci. Cryst. Eng. Mater.* **2013**, *69*, 249–259. <https://doi.org/10.1107/S2052519213010014>.
- (47) Dolomanov, O. V.; Bourhis, L. J.; Gildea, R. J.; Howard, J. A. K.; Puschmann, H. OLEX2: A Complete Structure Solution, Refinement and Analysis Program. *J. Appl. Crystallogr.* **2009**, *42*, 339–341. <https://doi.org/10.1107/S0021889808042726>.
